# Supplementary material for: Proteomic analysis in primary T cells reveals IL-7 alters T cell receptor thresholding via CYTIP/cytohesin/LFA-1 localisation and activation
Source: PubMed Central journal article supplement (PMC8883493; doi:10.1042/bcj20210313), 2022-02-04
Supplement: BCJ-479-225-s1.pdf [file BCJ-479-225-s1.pdf]

## Supplemental Information

Rayner M. L. Queiroz<sup>1-2\*</sup>, Siân C. Piper<sup>3\*</sup>, Johanna S. Rees<sup>1-2\* #</sup>, Sam Strickson<sup>3</sup>, Emmanuel Briend<sup>4</sup>, Choon Pei Low<sup>5</sup>, G. John Ferguson<sup>6</sup>, Kathryn S. Lilley<sup>1,2</sup>, Antony P. Jackson<sup>1</sup>, and Donna K. Finch<sup>4</sup>

### Supplemental Information Figures

#### Supplemental Information Figure S1

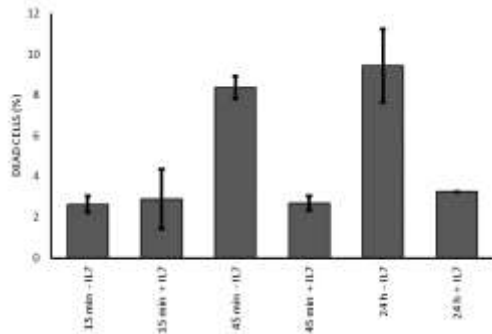

**Supplemental Information Figure S1. Total T cell viability is maintained after 24h culture without IL-7 even in absence of FBS.** The percentage of viable total T cells measured through flow-cytometry with a fixable Viability Dye eFluor® 780 and was superior to 90% when primed or not with IL-7 with and without FBS. Representative of data from 3 independent experiments in 3 donors.

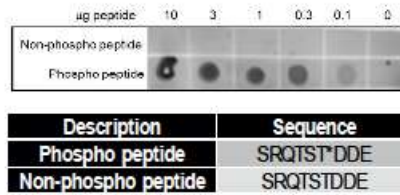

### Supplemental Information Figure S2

**Supplemental Information Figure 2. Specificity of anti-p-CYTIP<sup>T280</sup>** Dot blot analysis demonstrating that anti-p-CYTIP<sup>T280</sup> recognises the phosphorylated CYTIP peptide but not the non-phosphorylated peptide.

### Supplemental Information Figure S3

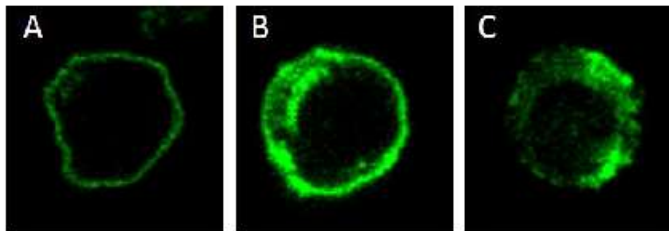

**Supplemental Information Figure S3. Analysis of incubation times for SPPLATing of CD3 molecules on the surface of primary human T cells in absence of IL-7 priming or TCR activation.** T cells were incubated with anti-CD3-HRP to label surface CD3 molecules. The labelled cells were incubated with biotin-tyramide for 1 min (A), 2 min (B) or 5 min (C) to allow biotinylation of CD3 associated proteins. To assess the degree of biotinylation achieved by each labelling time the cells were incubated with streptavidin-AF488, mounted in Duolink mounting media, and assessed by confocal microscopy for the degree of staining of the cell surface. A good degree of surface staining was observed after 2 min labelling, whereas 5min labelling resulted in some intracellular labelling. Confocal microscopy was performed using an Olympus Fluoview IX81-FVXF-2 laser scanning microscope with a UPLANAPO-N 60x magnification lense and numerical aperture set to 2, at room temperature. Acquisition was performed using Fluoview v 5.0 FV300 and images imported into GIMP2 for cropping and collation.

## Supplemental Information Figure S4

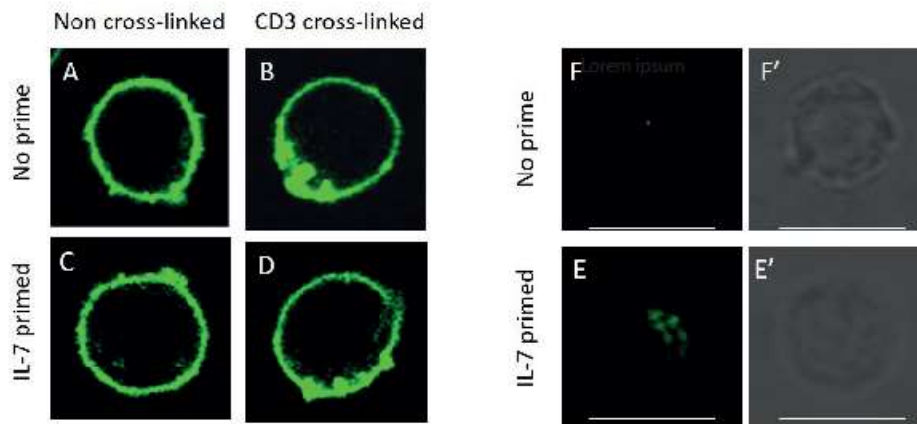

**Supplemental Information Figure S4. Analysis of IL-7 and/or TCR stimulation conditions for CD3 SPPLAT analysis on the surface of primary human T cells within 2 min biotinylation.** The Biotinylation profile of CD3 SPPLATed primary human T cells upon IL-7 and TCR stimulation was assessed. Following stimulation with CD3-HRP or HRP-tagged cross-linking antibody, the cells were incubated with biotin-tyramide for 2 min. After staining with streptavidin-AF488 and mounting using Duolink media the cells were assessed by confocal microscopy. (A) IL-7 unprimed and non-crosslinked CD3; (B) IL-7 unprimed and crosslinked CD3; (C) IL-7 primed and non-crosslinked CD3; (D) IL-7 primed and crosslinked CD3; (E) IL-7 primed and non-crosslinked CD3 Negative SPPLAT control; (E') brightfield view; (F) IL-7 unprimed and non-crosslinked CD3 Negative SPPLAT control; (F') brightfield view. Confocal microscopy was performed using an Olympus Fluoview IX81-FV5F-2 laser scanning microscope with a UPLANAPO-N 60x magnification lens and numerical aperture set to 2, at room temperature. Acquisition was performed using Fluoview v 5.0 FV300 and images imported into GIMP2 for cropping and collation.

## ***Supplemental Information Tables***

**As separate .pdf files**

**Supplemental Information Table S1.** Log<sub>2</sub>/median normalized TMT reporter intensities of 24 h IL-7 stimulation of human primary T cell total proteome

**Supplemental Information Table S2.** Log<sub>2</sub>/median normalized TMT reporter intensities of phosphorylation sites of 24 h IL-7 stimulation of human primary T cell phosphoproteome

**Supplemental Information Table S3.** Log<sub>2</sub>/median normalized TMT reporter intensities of regulated proteins (tab 3.1) and phosphorylation sites (tab 3.2) of 24 h IL-7 stimulation of human primary T cell total proteome

**Supplemental Information Table S4.** Raw Proteome discoverer output from the three replicates of Conditions A-F (tabs 4.1(A)-4.6(F))

**Supplemental Information Table S5.** Master protein identifications from CD3 SPPLATed primary human T cells with SILAC abundance ratio Light/Heavy > 1 (tab 5.1) and not in controls (tab 5.2)

**Supplemental Information Table S6.** Antibody sources, concentrations and applications

**Supplemental Information Table S7.** Summary of stimulation condition and antibody conjugation state per experimental design

**Supplemental Table 1.** Log2/median normalized TMT reporter intensities of 24 h IL-7 stimulation of human primary T cell total proteome

|           | Protein name         | Gene name  | Control_1 | Primed_1 | Control_2 | Primed_2 | Control_3 | Primed_3 | Control_4 | Primed_4 | Control_5 | Primed_5 |
|-----------|----------------------|------------|-----------|----------|-----------|----------|-----------|----------|-----------|----------|-----------|----------|
| A0A0B4J2F | Protein PIG          | PIGBOS1    | -0.17404  | -0.08743 | 0.056501  | -0.11431 | 0.224811  | 0.084632 | 0.033934  | -0.00448 | -0.00047  | 0.00861  |
| A0A5B9    | T cell receptor      | TRBC2 TCR  | -0.5025   | -0.5427  | -0.0516   | 0.137504 | -0.53382  | -0.24998 | -0.5697   | -0.47743 | -0.28584  | -0.18382 |
| A0AVT1    | Ubiquitin-like       | UBA6 MOP   | 1.675038  | 2.056396 | 1.850161  | 1.703332 | 1.859519  | 1.352211 | 1.743092  | 1.719688 | 1.746833  | 1.813663 |
| A0FGR8    | Extended sequence    | ESYT2 FAM  | 0.173037  | 0.329956 | 0.158866  | -0.07977 | 0.013274  | 0.147424 | 0.218001  | -0.1193  | -0.18593  | -0.1008  |
| A1L0T0    | 2-hydroxyacid        | ILVBL AHAS | -0.13993  | -0.23676 | -0.09259  | -0.16601 | -0.06075  | -0.24349 | -0.30666  | -0.13808 | -0.21299  | -0.1008  |
| A2A288    | Probable ribosome    | ZC3H12D C  | -1.32496  | -1.91667 | -1.93147  | -2.9386  | -4.42999  | -3.34395 | -3.09516  | -1.88982 | -3.45003  | -4.34873 |
| A2RRP1    | Neuroblastoma        | NBAS NAG   | -1.60942  | -1.69849 | -0.88753  | -0.91475 | -2.07635  | -1.40054 | -1.85415  | -3.07039 | -2.08746  | -1.70487 |
| A4D1P6    | WD repeat            | WDR91 HSI  | 0.082462  | 0.165586 | 0.26628   | 0.231326 | 0.859519  | 0.447459 | 0.010196  | 0.207595 | 0.719892  | 0.843565 |
| A5YKK6    | CCR4-NOT             | CNOT1 CDC  | -0.53882  | -0.41773 | -0.71058  | -0.74443 | -1.04532  | -0.58496 | -0.83936  | -0.79737 | -0.6325   | -0.56133 |
| A6NC98    | Coiled-coil          | CCDC88B B  | -1.26546  | -0.91667 | -0.93545  | -1.01808 | -0.81382  | -0.99604 | -0.53222  | -0.74846 | -0.96989  | -0.63691 |
| A6NDG6    | Glycerol-3-phosphate | PGP        | -0.15384  | -0.27551 | -1.52524  | -1.6235  | -1.26914  | -1.71652 | -1.77644  | -0.81978 | -1.04807  | -1.0838  |
| A6NHR9    | Structural ribosome  | SMCHD1 KI  | 0.138605  | 0.236803 | 0.137504  | 0.329436 | 0.31895   | 0.390234 | 0.213595  | 0.326501 | 0.331327  | 0.323697 |
| A6NI79    | Coiled-coil          | CCDC69     | -0.0661   | -0.05331 | 0.141087  | -0.11126 | 0.272583  | 0.275658 | 0.15004   | 0.21672  | 0.05391   | -0.13967 |
| A6NIH7    | Protein uncoupled    | UNC119B    | -2.27442  | -2.03297 | -1.65509  | -1.25437 | -1.46069  | -1.3626  | -1.58971  | -1.35213 | -1.52441  | -1.44274 |
| A6NJ78    | 12S rRNA             | MMETTL15 N | -3.13993  | -2.42286 | -2.08844  | -2.9386  | NA        | NA       | -3.81762  | -3.1193  | -2.06756  | -2.06333 |
| A8MPS7    | Carbohydrate         | YDJC       | -3.13993  | -1.16506 | -1.13906  | -1.54171 | -1.47063  | -1.5366  | -1.43911  | -2.04654 | -0.95361  | -0.53495 |
| A8MVM7    | Putative uridine     | 0          | 1.314636  | 1.549436 | 1.489598  | 1.430634 | 1.345531  | 1.381871 | 1.564352  | 1.417183 | 1.632876  | 1.695666 |
| B0I1T2    | Unconventional       | MYO1G HA   | 0.03592   | 0.144226 | 0.09423   | 0.373678 | -0.17365  | 0.264767 | 0.110029  | 0.410737 | 0.130629  | 0.017594 |
| B7ZAP0    | Rab GTPase           | RABGAP1L   | 1.829696  | 1.842571 | 2.358123  | 2.245945 | 2.519028  | 2.195204 | 2.191366  | 2.363683 | 2.777411  | 2.634978 |
| B9A064    | Immunoglobulin       | IGLL5      | 2.486725  | 2.489598 | 0.704633  | 0.942413 | 0.648015  | 1.117997 | 1.103623  | 0.880701 | 1.591235  | 1.114796 |
| C9J7I0    | UBAP1-MV             | UMAD1 RP   | -2.53727  | -1.96153 | -1.91667  | -1.56009 | -1.31451  | -1.81558 | -2.11718  | -1.86876 | -1.58496  | -2.1589  |
| E9PRG8    | Uncharacterized      | C11orf98   | -0.08746  | -0.29776 | 0.348202  | 0.294061 | 0.47155   | 0.595851 | 0.66458   | 0.312739 | 0.523972  | 0.287896 |
| G9CGD6    | CNK3/IPCE            | CNK3/IPCE  | 0.48158   | 0.510426 | 0.555037  | 0.462109 | 0.496765  | 0.58502  | 0.737699  | 0.796327 | 1.121857  | 0.938304 |
| I3L1I5    | Rho guanine          | ARHGEF18   | -0.84828  | -0.63268 | -0.5475   | -0.82854 | -0.56485  | -0.42609 | -0.75046  | -0.7384  | -0.41926  | -0.3252  |
| L0R819    | ASNSD1 up            | ASDURF     | 1.102362  | 1.225175 | 1.553427  | 1.049328 | 1.564994  | 1.35435  | 1.301318  | 1.162271 | 1.938599  | 1.744029 |
| O00116    | Alkyl dihydro        | AGPS AAGE  | -0.30006  | -0.62118 | -0.3085   | -0.30521 | -0.73766  | -0.15654 | -0.53723  | -0.47746 | -0.53175  | -0.24073 |
| O00139    | Kinesin-like         | KIF2A KIF2 | 0.029995  | 0.418124 | -0.39569  | -0.28325 | -0.66918  | -0.45194 | -0.26919  | 0.093774 | -0.32624  | -0.21945 |
| O00148    | ATP-dependent        | DDX39A DI  | -0.22147  | -0.06153 | -0.14851  | -0.19257 | -0.71499  | -0.75982 | -0.65105  | -0.73835 | -0.93139  | -0.9967  |
| O00151    | PDZ and LIM          | PDLIM1 CLI | -0.04307  | 0.137504 | -0.10932  | 0.198904 | -1.10806  | -0.75899 | -0.19118  | -0.15073 | -1.36257  | -0.77887 |
| O00154    | Cytosolic a          | ACOT7 BAC  | -0.85641  | -0.66307 | -0.67911  | -0.65337 | -1.75056  | -1.65392 | -0.80009  | -1.1414  | -1.21287  | -1.53673 |
| O00160    | Unconventional       | MYO1F      | 0.422595  | 0.513013 | 0.730713  | 0.7507   | 0.637154  | 0.536806 | 0.67423   | 0.303491 | -0.68793  | -0.61156 |

|        |                        |          |          |          |          |          |          |          |          |          |          |
|--------|------------------------|----------|----------|----------|----------|----------|----------|----------|----------|----------|----------|
| O00161 | Synaptosor SNAP23      | -0.05069 | -0.01971 | -0.04274 | -0.09678 | -0.04534 | 0.109011 | -0.02914 | -0.06148 | -0.26303 | -0.47836 |
| O00170 | AH recepto AIP XAP2    | 0.420777 | 0.320159 | 0.836096 | 0.632658 | 0.652134 | 0.676414 | 0.576364 | 0.601265 | 0.697449 | 0.490772 |
| O00178 | GTP-bindin GTPBP1      | -0.60251 | -0.44072 | -0.23702 | -0.38008 | -0.77607 | -0.82565 | -0.24625 | -0.76134 | -0.75796 | -0.70188 |
| O00182 | Galectin-9 LGALS9      | -0.31739 | -0.5541  | -0.29776 | -0.2986  | -1.53382 | -0.80599 | -0.65574 | -0.50967 | -0.37474 | -1.1589  |
| O00186 | Syntaxin-bi STXBP3     | -0.65883 | -0.42205 | -0.03639 | -0.10823 | 0.006167 | 0.11306  | 0.027255 | 0.123071 | -0.16801 | -0.07757 |
| O00193 | Small acidu SMAP C11c  | -0.24788 | -0.05933 | 0.254952 | -0.06156 | -0.03354 | 0.244629 | -0.14268 | 0.126833 | 0.74624  | 0.818325 |
| O00203 | AP-3 comp AP3B1 ADT    | -0.0743  | 0.128499 | 0.08755  | 0.268252 | 0.20045  | 0.204766 | 0.215758 | 0.145534 | 0.098896 | 0.30007  |
| O00217 | NADH dehy NDUFS8       | 0.531514 | 0.440463 | 0.429074 | 0.55864  | 0.408839 | 0.32349  | 0.367039 | 0.811582 | 0.757536 | 0.581997 |
| O00221 | NF-kappa-E NFKBIE IKB  | -1.72489 | -1.44392 | -1.10512 | -1.89129 | -1.39046 | -1.37197 | -0.9898  | -1.76783 | -1.23502 | -1.6763  |
| O00231 | 26S protea PSMD11      | 0.514197 | 0.512131 | 0.251549 | 0.464503 | 0.031533 | 0.328819 | 0.142443 | 0.089293 | 0.149982 | 0.053883 |
| O00232 | 26S protea PSMD12      | 0.248934 | 0.158874 | 0.311748 | 0.276226 | 0.299827 | 0.124173 | 0.152168 | 0.228204 | 0.105859 | 0.288276 |
| O00233 | 26S protea PSMD9       | -0.40332 | 0.027039 | 0.437285 | 0.005705 | -0.19903 | -0.4975  | 0.507907 | 0.22376  | 0.025609 | 0.224919 |
| O00244 | Copper tra ATOX1 HA    | 0.530844 | 0.601144 | 0.759674 | 0.714568 | 0.751444 | 0.71719  | 0.649962 | 0.59119  | 0.877513 | 0.581644 |
| O00255 | Menin MEN1 SCG         | -1.60942 | -1.75002 | -1.68589 | -1.11757 | -0.89072 | -0.78858 | -1.5697  | -1.29078 | -1.20211 | -1.2402  |
| O00257 | E3 SUMO- $\gamma$ CBX4 | -0.47433 | -0.34094 | -0.58782 | -0.75982 | -0.31256 | -0.25144 | -0.41483 | -0.65361 | -0.05582 | -0.27438 |
| O00264 | Membrane PGRMC1 H      | -0.23971 | -0.03955 | -0.89478 | -0.68242 | -0.45031 | -0.6116  | -0.33401 | -0.66743 | -0.9198  | -1.07994 |
| O00267 | Transcripti SUPT5H SP  | -0.51623 | -0.56899 | -0.33171 | -0.52862 | -0.53182 | -0.36572 | -0.66755 | -0.58828 | -0.33814 | -0.34446 |
| O00268 | Transcripti TAF4 TAF2  | -1.73498 | -1.95595 | -1.61021 | -1.51996 | -1.43054 | -1.41533 | -1.65342 | -1.47746 | -1.3473  | -1.28352 |
| O00273 | DNA fragm DFFA DFF1    | -0.25848 | -0.14768 | 0.203328 | 0.222184 | 0.123112 | -0.10188 | -0.25081 | -0.06165 | 0.38102  | 0.422576 |
| O00287 | Regulatory RFXAP       | -0.58193 | -0.4761  | -0.09675 | 0        | -0.06853 | -0.37906 | -0.80863 | -0.33342 | -0.22396 | -0.25597 |
| O00299 | Chloride in CLIC1 G6 N | 0.213707 | 0.52661  | 0.648528 | 0.626185 | 0.325083 | 0.090032 | 0.491982 | 0.207595 | 0.181835 | -0.0223  |
| O00303 | Eukaryotic EIF3F EIF3S | 0.402343 | 0.429922 | -0.32518 | 0.102163 | -0.45672 | -0.6158  | -0.09777 | -0.56003 | -0.59614 | -0.05669 |
| O00308 | NEDD4-like WWP2        | -1.70499 | -2.32193 | -1.66102 | -1.63604 | -1.19052 | -1.2115  | -1.55459 | -1.80735 | -2.39941 | -1.0268  |
| O00329 | Phosphatid PIK3CD      | -0.13771 | 0.063166 | -0.88178 | -0.7635  | -0.85024 | -0.96884 | -0.91612 | -0.96105 | -0.67693 | -0.52302 |
| O00330 | Pyruvate d PDHX PDX1   | 0.302882 | 0.451423 | 0.257337 | 0.304418 | 0.185371 | 0        | 0.15545  | 0.197646 | 0.409399 | 0.139912 |
| O00410 | Importin-5 IPO5 KPNB   | -0.04763 | 0.194538 | -0.44147 | -0.22483 | -0.69077 | -0.71923 | -0.66843 | -0.87959 | -0.76857 | -0.35257 |
| O00422 | Histone de SAP18 GIG   | 0.632659 | 0.67379  | 0.747068 | 0.726167 | 0.552102 | 0.750022 | 0.820451 | 0.681206 | 0.725606 | 0.602557 |
| O00429 | Dynamin-1 DNML1 DLI    | 0.612977 | 0.716909 | 0.38001  | 0.386687 | 0.610396 | 0.215332 | 0.545188 | 0.294289 | 0.12846  | 0.455803 |
| O00442 | RNA 3'-terr RTCA RPC F | -0.30993 | -0.34736 | 0.187234 | 0.134285 | 0.258791 | 0.190649 | 0.131934 | 0.003038 | -0.0287  | 0.100832 |
| O00478 | Butyrophili BTN3A3 BT  | -2.53727 | -1.37151 | -1.63656 | -1.71621 | -2.84503 | -1.79647 | -1.87276 | -1.55102 | -1.57089 | -1.39453 |
| O00479 | High mobili HMGN4 HN   | -0.9418  | -0.86605 | 0.102158 | -0.04521 | -0.13355 | -0.32845 | -0.08672 | -0.69858 | 0.377942 | 0.394768 |
| O00481 | Butyrophili BTN3A1 BT  | -0.84215 | -1.17943 | -1.08789 | -1.29221 | -0.89575 | -1.62795 | 0.811733 | 1.008562 | -1.98201 | -1.55437 |
| O00483 | Cytochrom NDUFA4       | 0.86119  | 0.777453 | 0.716257 | 0.687544 | 0.59172  | 0.371161 | 0.670992 | 0.68033  | 0.277017 | 0.051823 |

|        |              |              |          |          |          |          |          |          |          |          |          |          |
|--------|--------------|--------------|----------|----------|----------|----------|----------|----------|----------|----------|----------|----------|
| O00487 | 26S protea   | PSMD14 PC    | 1.550878 | 1.408852 | 1.955593 | 1.416054 | 1.892075 | 1.737929 | 1.730361 | 1.845299 | 2.103099 | 1.90714  |
| O00488 | Zinc finger  | ZNF593 ZT    | -2.89482 | -2.28345 | -1.73697 | -2.75803 | -1.2076  | -2.83494 | -1.39808 | -3.02308 | -2.52947 | -1.93934 |
| O00499 | Myc box-d    | BIN1 AMP     | 0.394431 | 0.539103 | 0.555603 | 0.343729 | 0.494375 | 0.425023 | 0.588724 | 0.593949 | 0.768112 | 1.029475 |
| O00505 | Importin s   | KPNA3 QIP    | -1.13993 | -1.35147 | -0.12624 | -1.15899 | -0.39046 | -0.68684 | -0.95964 | -0.9886  | -0.47603 | -1.1589  |
| O00522 | Krev intera  | KRIT1 CCM    | -0.13771 | 0.034718 | -0.10412 | -0.32297 | -0.30281 | 0.019119 | 0.047187 | -0.12772 | -0.33663 | -0.1483  |
| O00541 | Pescadillo   | IPES1        | -1.50897 | -1.32219 | -1.54091 | -1.70337 | -0.65478 | -0.5579  | -0.43137 | -0.56589 | -1.45511 | -0.98893 |
| O00560 | Syntenin-1   | SDCBP MD     | -2.47996 | -1.73702 | -0.78124 | -0.57573 | -1.42031 | -1.44678 | -1.34286 | -2.6933  | -1.28038 | -1.17547 |
| O00562 | Membrane     | PITPNM1 C    | -0.45618 | -0.23561 | -0.18273 | -0.19512 | -0.42396 | -0.3107  | -0.48099 | -0.54275 | -0.60796 | -0.77164 |
| O00566 | U3 small nt  | MPHOSPH      | 0.840607 | 0.67319  | 0.854481 | 0.716752 | 0.871762 | 0.686925 | 1.116113 | 0.912724 | 1.046393 | 1.250126 |
| O00567 | Nucleolar    | ç NOP56 NO   | 0.80215  | 0.779231 | 0.59754  | 0.515567 | 0.85271  | 0.706921 | 0.779312 | 0.624671 | 0.462926 | 0.441565 |
| O00571 | ATP-depen    | DDX3X DB     | 0.889817 | 1.01165  | -0.66955 | -1.76304 | -0.89681 | -0.44964 | -0.5723  | -1.12317 | 0.827421 | 0.656896 |
| O00584 | Ribonuclea   | RNASSET2 R   | 1.105182 | 0.942324 | 1.103791 | 1.012491 | 1.55467  | 1.539888 | 1.608398 | 1.645691 | 1.013826 | 0.955818 |
| O00602 | Ficolin-1    | (C FCN1 FCNM | -0.91754 | -1.72403 | -1.31221 | -0.39428 | -0.38074 | -0.56866 | -0.0897  | -0.32623 | -0.81444 | -0.45998 |
| O00629 | Importin s   | KPNA4 QIP    | -0.13829 | -0.0048  | -1.21916 | -1.03802 | -1.05759 | -1.05076 | -1.01551 | -0.96087 | -0.89321 | -0.945   |
| O00635 | E3 ubiquiti  | TRIM38 RN    | -0.15614 | -0.2106  | -0.24172 | -0.06812 | -0.34949 | 0.209426 | -0.12491 | -0.08506 | -0.11476 | -0.3921  |
| O00743 | Serine/thre  | PPP6C PPP    | 0.806734 | 0.808469 | 0.387482 | 0.88243  | 0.174874 | 0.923122 | 0.874469 | 0.738628 | 0.693897 | 0.400385 |
| O00757 | Fructose-1,  | FBP2         | -1.87245 | -1.32193 | -1.7632  | -1.69574 | -2.69302 | -1.5366  | -1.28157 | -1.24936 | -0.65748 | -0.89752 |
| O00764 | Pyridoxal k  | PDXK C21o    | -1.13993 | -1.27399 | -1.39183 | -1.30259 | -1.66918 | -1.47454 | -2.16829 | -1.62619 | -2.09925 | -0.97285 |
| O14497 | AT-rich int  | ARID1A BA    | 0.531203 | 0.294985 | 0.279988 | 0.377195 | 0.199811 | 0.335881 | 0.372196 | 0.445012 | 0.279359 | 0.474414 |
| O14498 | Immunoglc    | ISLR UNQ1:   | -0.74507 | -0.69849 | -0.46529 | -0.56009 | 0.43351  | 0.179608 | -0.40484 | -0.15073 | 0.060025 | 0.330752 |
| O14526 | F-BAR dom    | FCHO1 KIA    | -0.30236 | -0.26459 | -0.58301 | -0.34564 | -0.58869 | -0.51301 | -0.60039 | -0.47743 | -1.04793 | 0.090064 |
| O14545 | TRAF-type    | TRAFD1 FLI   | -1.98973 | -1.5793  | -1.05565 | -1.4521  | -1.71748 | -1.61813 | -1.76739 | -1.85632 | -1.1281  | -1.08194 |
| O14561 | Acyl carrier | NDUFAB1      | 1.933319 | 1.751707 | 0.781501 | 1.276043 | 0.594844 | 1.676705 | 1.36626  | 1.246722 | 0.540274 | 0.155098 |
| O14579 | Coatomer     | ç COPE       | 0.40439  | 0.488209 | 0.203328 | 0.043253 | 0.086588 | 0.189226 | 0.191366 | -0.18286 | 0.069042 | 0.291517 |
| O14602 | Eukaryotic   | EIF1AY       | -1.38702 | -0.93147 | 0.301509 | 0.148863 | -2.31451 | -1.83494 | -0.16227 | -0.10692 | 0.606798 | 0.555154 |
| O14617 | AP-3 comp    | AP3D1 PRC    | 1.03592  | 0.91983  | 1.254888 | 1.157325 | 1.236138 | 1.315355 | 0.860449 | 1.144254 | 1.195883 | 1.444062 |
| O14618 | Copper cha   | CCS          | -0.83722 | -1.20365 | -0.4195  | -0.03532 | -0.21492 | -0.17061 | -0.77051 | -0.35651 | -0.08001 | 0.178701 |
| O14639 | Actin-bindi  | ABLIM1 AB    | -0.59104 | -0.78583 | 0.285602 | -0.36639 | -0.07635 | -0.48714 | -0.30666 | -0.09464 | 0.387063 | 0.656896 |
| O14641 | Segment p    | DVL2         | -1.87245 | -1.69849 | -0.73697 | -1.20163 | -1.24236 | -1.35789 | -1.46713 | -0.80735 | -1.5025  | -1.1788  |
| O14646 | Chromodo     | CHD1         | -1.25096 | -1.13866 | -0.84813 | -0.37637 | -0.77036 | -0.56589 | -0.47528 | -0.53167 | -0.503   | -0.56106 |
| O14647 | Chromodo     | CHD2         | -1.51978 | -1.28345 | -1.4761  | -1.50564 | -1.22487 | -1.52083 | -1.48134 | -1.65535 | -1.33852 | -0.97369 |
| O14653 | Golgi SNAP   | GOSR2 GS2    | -0.77588 | -0.53703 | -0.47069 | -0.86821 | -0.97056 | -0.2962  | -0.40484 | -0.73888 | -0.61353 | -1.06333 |
| O14662 | Syntaxin-1   | (STX16       | -3.37126 | -2.4021  | -2.42286 | -1.63604 | -3.01495 | -3.04439 | -3.89162 | -3.58496 | -3.00946 | -2.28264 |

|        |                         |          |          |          |          |          |          |          |          |          |          |
|--------|-------------------------|----------|----------|----------|----------|----------|----------|----------|----------|----------|----------|
| O14672 | Disintegrin ADAM10 K    | 0.24984  | 0.2824   | 0.399356 | -0.0906  | 0.294905 | 0.326293 | 0.611993 | 0.453173 | 0.546743 | 0.50614  |
| O14683 | Tumor proTP53I11 PI     | -0.34023 | -0.74348 | -0.6734  | -0.31411 | -0.58869 | -0.66069 | -0.96963 | -0.96605 | -1.62803 | -1.55431 |
| O14737 | ProgrammePDCD5 TFA      | -0.70482 | -0.77767 | -0.45534 | -0.83861 | -0.58665 | -0.62189 | -0.71681 | -0.80361 | -0.09946 | 0.00454  |
| O14744 | Protein arg PRMT5 HRI   | -1.64689 | -1.94642 | -3.62449 | -1.8011  | -2.59991 | -2.23704 | -1.51019 | -3.07039 | -3.39941 | -3.1788  |
| O14745 | Na(+)/H(+) SLC9A3R1 I   | -0.08542 | -0.03953 | -0.44076 | -0.45824 | -0.54156 | -0.73866 | -0.76214 | -0.67733 | -0.66724 | -0.38248 |
| O14773 | Tripeptidyl TPP1 CLN2   | 0.856726 | 0.934185 | 0.416986 | 0.176878 | -0.07635 | 0.189226 | 0.500694 | 0.308122 | -0.04307 | -0.56737 |
| O14776 | Transcripti TCERG1 CA   | 0.20847  | 0.116077 | 0.360402 | 0.283793 | 0.427993 | 0.459432 | 0.460361 | 0.353637 | 0.382857 | 0.471451 |
| O14787 | Transportir TNPO2       | -2.85042 | -2.42286 | NA       | NA       | -3.35199 | -3.65208 | -2.9301  | -3.97728 | -2.30319 | -3.82517 |
| O14802 | DNA-direct POLR3A       | -3.43539 | -3.36146 | -2.2276  | -2.56009 | -2.55552 | -2.45943 | -2.23266 | -2.04654 | -3.04793 | -2.21945 |
| O14818 | Proteasom PSMA7 HSF     | 0.506813 | 0.58598  | -0.10512 | -0.1186  | 0.425352 | 0.207984 | 0.243817 | 0.522494 | 0.258312 | -0.09606 |
| O14827 | Ras-specific RASGRF2 G  | -0.54241 | -0.73688 | -1.35385 | -1.23433 | -1.04166 | -0.7216  | -1.38728 | -1.0145  | -0.98178 | -0.9281  |
| O14828 | Secretory c SCAMP3 C1   | -1.02445 | -1.25526 | -1.16506 | -1.0126  | -1.31451 | -1.37197 | -1.3322  | -1.09464 | -1.11784 | -1.03585 |
| O14867 | Transcripti BACH1       | -3.08746 | -2.5541  | NA       | NA       | NA       | NA       | -4.43911 | -3.80735 | -3.25739 | -3.1008  |
| O14879 | Interferon- IFIT3 CIG-4 | -0.04052 | 0.079818 | -0.25551 | -0.16614 | -0.7138  | -0.38413 | -0.5133  | -0.02843 | 0.36548  | 0.619357 |
| O14893 | Gem-assoc GEMIN2 SII    | -0.54609 | -0.2185  | -0.20046 | -0.19444 | -0.07635 | -0.24349 | -0.5175  | -0.33342 | -0.3445  | -0.26658 |
| O14908 | PDZ domai GIPC1 C19c    | 0.242581 | 0.377869 | 0.230051 | 0.507171 | 0.49552  | 0.215762 | 0.275743 | 0.419128 | 0.231722 | 0.111088 |
| O14920 | Inhibitor of IKKB IKKB  | -0.15046 | -0.17383 | -0.44923 | -0.46836 | -0.74193 | -0.67807 | -0.29406 | -0.946   | -0.86166 | -0.90379 |
| O14929 | Histone ac HAT1 KAT1    | -0.88359 | -0.78991 | -0.93892 | -0.85681 | -1.51245 | -0.59318 | -1.18536 | -1.6735  | -1.2916  | -1.6763  |
| O14933 | Ubiquitin/I UBE2L6 UB   | 0.584396 | 0.49932  | 0.902116 | 1.098471 | 0.596414 | 0.561816 | 0.909352 | 0.957812 | 0.811906 | 0.945695 |
| O14949 | Cytochrom UQCRCQ        | 1.440573 | 1.642296 | 0.812914 | 1.037153 | 0.954676 | 0.573991 | 1.259192 | 0.968164 | 0.293359 | 0.552139 |
| O14950 | Myosin reg MYL12B M     | 0.131244 | -0.01391 | -0.13505 | -0.24842 | 0.007546 | -0.15264 | -0.03928 | -0.08311 | -0.17102 | 0.054923 |
| O14964 | Hepatocyte HGS HRS      | -0.6133  | -0.70574 | -0.54868 | -0.2168  | -0.79256 | -0.55034 | -0.52712 | -1.11311 | -0.74733 | -0.55431 |
| O14966 | Ras-relatec RAB29 RAB   | -1.60942 | -1.35147 | -2.03953 | -2.06413 | -2.55552 | -2       | -2.81762 | -2.04654 | -3.1281  | -3.44184 |
| O14972 | Vacuolar pi VPS26C DC   | -3.30986 | -2.20945 | -2.26459 | -3.20163 | -3.01495 | -1.52083 | -2.13955 | -2.04654 | -3.97818 | -3.24036 |
| O14974 | Protein phc PPP1R12A    | -0.25162 | -0.09087 | -0.11496 | -0.14081 | -0.3554  | -0.35443 | -0.32831 | -0.32944 | -0.16375 | -0.18348 |
| O14976 | Cyclin-G-as GAK         | -1.49133 | -1.08961 | -0.85788 | -0.80257 | -1.1351  | -1.29991 | -1.01966 | -0.98681 | -0.88265 | -1.35839 |
| O14979 | Heterogen HNRNPDL I     | 0.029995 | 0.295167 | 0.584963 | 0.613942 | 0.397242 | 0.81201  | 0.426503 | 0.680728 | 1.108934 | 0.79593  |
| O14980 | Exportin-1 XPO1 CRM     | -0.02445 | 0.396397 | -0.73276 | -0.41495 | -0.53866 | -0.52773 | -0.31824 | -0.37967 | -0.56987 | -0.67679 |
| O14981 | TATA-bindi BTAF1 TAF    | -1.18057 | -0.61849 | -1.1305  | -1.54171 | -1.84503 | -1.83494 | -0.97968 | -1.60224 | -1.4892  | -1.26127 |
| O15015 | Zinc finger ZNF646 KIA  | -1.18057 | -0.70483 | -0.64264 | -0.85681 | -0.63413 | -0.45194 | -1.23266 | -0.65535 | -0.71049 | -0.44786 |
| O15027 | Protein tra SEC16A KIA  | -1.85042 | -1.50697 | -1.04328 | -1.17306 | -0.55552 | -0.70454 | -1.17585 | -1.28273 | -0.98126 | -0.48301 |
| O15042 | U2 snRNP-i U2SURP KI    | -0.23661 | -0.29298 | 0.101614 | -0.18015 | -0.04435 | -0.28951 | 0.104926 | -0.1734  | -0.03115 | -0.08029 |
| O15047 | Histone-lys SETD1A KIA  | -1.14131 | -1.02364 | -1.16776 | -1.38013 | -0.57712 | -0.29547 | -0.51012 | -0.42212 | -0.72123 | -0.89875 |



|        |                        |          |          |          |          |          |           |          |          |          |          |
|--------|------------------------|----------|----------|----------|----------|----------|-----------|----------|----------|----------|----------|
| O15050 | TPR and an TRANK1 KI   | -0.90613 | -0.7632  | -0.44923 | -0.5881  | -0.42    | -0.41504  | -0.77323 | -0.93289 | -0.79796 | -0.64137 |
| O15056 | Synaptojan SYNJ2 KIAA  | -1.25096 | -1.26459 | -1.18265 | -1.02531 | -0.83173 | -0.87447  | -1.3322  | -1.36257 | -0.62803 | -0.8893  |
| O15067 | Phosphoric PFAS KIAAC  | -1.76553 | -1.20945 | -1.09675 | -1.45317 | -1.15697 | -0.88452  | -1.66382 | -1.13179 | -1.24616 | -0.60054 |
| O15111 | Inhibitor of CHUK IKKA | 1.059379 | 0.899071 | 0.812914 | 0.705257 | 0.703868 | 0.778973  | 0.899368 | 0.63005  | -1.65571 | -1.86584 |
| O15117 | FYN-bindin FYB1 FYB S  | -0.47763 | -0.61752 | -0.08972 | -0.20648 | -0.2974  | -0.27621  | -0.48208 | -0.55658 | -0.28431 | -0.30626 |
| O15118 | NPC intrac NPC1        | -0.5639  | -0.27872 | 0        | 0.4899   | -0.25118 | 0.074547  | 0.595158 | 0.177538 | -1.07748 | -0.41209 |
| O15120 | 1-acyl-sn-g AGPAT2     | -0.58193 | -0.78319 | -0.65486 | -0.36976 | -0.71727 | -1.06711  | -0.80863 | -0.83773 | -1.04793 | -1.28264 |
| O15126 | Secretory c SCAMP1 SC  | -0.76553 | -1.26459 | -1.10512 | -0.69574 | -0.81855 | -1.11366  | -0.97968 | -1.24936 | -1.10764 | -1.31531 |
| O15127 | Secretory c SCAMP2     | -0.07089 | -0.03559 | -0.13906 | -0.03171 | -0.37479 | -0.16625  | -0.25858 | -0.23261 | -0.24097 | -0.24553 |
| O15143 | Actin-relat ARPC1B AR  | 0.348629 | 0.502131 | 0.380265 | 0.276041 | 0.225613 | 0.209782  | 0.302385 | 0.30714  | 0.404034 | 0.305333 |
| O15144 | Actin-relat ARPC2 ARC  | 1.114016 | 1.195949 | 0.453986 | 0.513883 | 0.137986 | 0.424454  | 0.600639 | 0.464913 | 0.19587  | 0.047718 |
| O15145 | Actin-relat ARPC3 ARC  | -0.77849 | 0.261602 | -0.86014 | -0.98998 | -1.14002 | -0.90797  | -0.4957  | -0.39516 | -0.71902 | -1.18453 |
| O15160 | DNA-direct POLR1C PC   | 0.22785  | -0.05743 | -0.1151  | -0.07469 | 0.09876  | -0.01066  | -0.28287 | -0.04404 | 0.153078 | -0.09643 |
| O15164 | Transcripti TRIM24 RN  | -2.76553 | -2.03953 | -0.82981 | -0.42042 | -0.67131 | -1.10155  | -0.87462 | -0.66826 | -0.83995 | -0.69342 |
| O15173 | Membrane PGRMC2 D      | -0.98718 | -1.01626 | -1.71483 | -1.50685 | -0.74193 | -1.23704  | -1.92224 | -1.99837 | -1.59918 | -1.56737 |
| O15212 | Prefoldin s PFDN6 HKE  | 0.446021 | 0.711643 | 0.552244 | 0.803819 | 0.617662 | 0.416166  | 0.678895 | 0.495682 | 0.600958 | 0.985254 |
| O15213 | WD repeat WDR46 BIN    | -0.38646 | -0.43273 | -1.0593  | -0.83171 | -0.6668  | -0.75004  | -0.67608 | -1.18058 | -0.92867 | -0.65894 |
| O15231 | Zinc finger ZNF185     | 1.693897 | 0.566651 | 1.478447 | 1.476438 | 0.875821 | 0.871485  | 1.094068 | 0.988504 | 0.625255 | 2.833045 |
| O15234 | Protein CA CASC3 MLN   | -1.49044 | -1.36271 | -2.06935 | -1.25212 | -2.01998 | -1.77143  | -1.21838 | -1.04785 | -1.34775 | -0.71739 |
| O15270 | Serine paln SPTLC2 KIA | -2.85042 | -2.00782 | -2.44392 | -3.59756 | NA       | NA        | -3.3322  | -2.97728 | -2.02857 | -2.39453 |
| O15294 | UDP-N-ace OGT          | -0.02524 | -0.21834 | -0.58379 | -0.52678 | -0.58414 | -0.36935  | -0.36375 | -0.79155 | -0.876   | -1.03019 |
| O15305 | Phosphom PMM2          | -0.27479 | -0.64526 | 0.034215 | -0.2018  | 0.115313 | 0.02652   | -0.32613 | -0.26305 | 0.034389 | 0.243942 |
| O15320 | Melanoma MIA2 CTAC     | 0.215872 | 0.215015 | 0.442748 | 0.52527  | 0.303639 | 0.347252  | 0.444941 | 0.373427 | 0.149152 | 0.014847 |
| O15327 | Inositol pol INPP4B    | -1.94137 | -1.48228 | -1.42833 | -1.77715 | -2.07977 | -1.09048  | -1.86707 | -1.50064 | -0.84516 | -1.03508 |
| O15347 | High mobil HMGB3 HM    | 1.088176 | 1.12683  | 1.657164 | 1.498763 | 1.60011  | 1.684201  | 1.742293 | 1.900633 | 1.721311 | 1.483215 |
| O15355 | Protein phc PPM1G PPI  | -0.73495 | -0.57719 | -0.31845 | -0.42047 | -0.24731 | -0.47594  | -0.25718 | -0.34024 | -0.08559 | -0.64982 |
| O15357 | Phosphatid INPPL1 SHI  | -1.57289 | -1.96153 | -1.45457 | -1.35364 | -2.55552 | -2.16175  | -1.81762 | -1.46949 | -1.95361 | -1.41799 |
| O15371 | Eukaryotic EIF3D EIF3E | 0.449307 | 0.687218 | 0.357615 | 0.412452 | 0.301434 | 0.275135  | 0.459283 | 0.347692 | 0.361852 | 0.396141 |
| O15372 | Eukaryotic EIF3H EIF3I | 0.135087 | 0.196539 | 0.23017  | 0.411898 | 0.107446 | -0.14958  | 0.113114 | 0.340133 | 0.1133   | 0.174834 |
| O15379 | Histone de HDAC3       | 0.290058 | 0.548103 | -1.91099 | -1.62247 | 0.168271 | 0.259387  | -0.15656 | 0.067114 | -1.80207 | -2.01606 |
| O15381 | Nuclear val NVL NVL2   | 0.484561 | 0.618366 | 0.817347 | 0.812721 | 0.83054  | 0.986273  | 0.820451 | 1.005714 | 0.776035 | 0.31305  |
| O15382 | Branched-c BCAT2 BCA   | -0.18052 | 0.002446 | 0.206636 | 0.390348 | 0.276487 | -6.21E-05 | 0.001051 | -0.3753  | 0.066931 | 0.357375 |
| O15400 | Syntaxin-7 STX7        | -1.45666 | -1.31381 | -1.33536 | -1.09358 | -1.23002 | -1.18406  | -1.52065 | -1.25426 | -1.2709  | -1.09741 |

|        |             |            |          |          |          |          |          |          |          |          |          |          |
|--------|-------------|------------|----------|----------|----------|----------|----------|----------|----------|----------|----------|----------|
| O15427 | Monocarbo   | SLC16A3 M  | -0.79679 | -1.15634 | -0.57138 | -0.04459 | -0.42999 | -0.2962  | -0.88216 | 0.764187 | -0.46297 | -0.0268  |
| O15446 | DNA-direct  | POLR1G AS  | -0.32605 | -0.28354 | -0.82443 | -1.07165 | -1.47993 | -0.96878 | -0.57385 | -0.94747 | -1.21857 | -0.71165 |
| O15498 | Synaptobre  | YKT6       | -0.79637 | -0.22563 | -0.36866 | -0.47702 | -0.72926 | -0.48429 | -0.22337 | -0.87779 | -0.86    | -0.34205 |
| O15511 | Actin-relat | ARPC5 ARC  | -0.20655 | -0.04626 | 0.459427 | 0.287587 | 0.441837 | 0.14095  | 0.172147 | 0.213796 | 0.622524 | 0.801453 |
| O15514 | DNA-direct  | POLR2D     | -0.00169 | 0.391273 | 0.055413 | 0.112864 | 0.32929  | 0.03414  | 0.106649 | 0.190103 | 0.551424 | 0.446715 |
| O15523 | ATP-depen   | DDX3Y DBY  | 0.712513 | 0.749389 | 0.27919  | 0.516454 | -0.71727 | -0.77761 | 0.173332 | 0.045088 | 0.173065 | 0.9063   |
| O15530 | 3-phosphoi  | PDPK1 PDK  | 0.573582 | 0.679137 | 0.750122 | 0.221643 | 0.658737 | 0.680986 | 0.578467 | 0.232832 | 0.370352 | 0.11649  |
| O15533 | Tapasin (TF | TAPBP NGS  | -0.21963 | -0.32435 | -0.98297 | -0.73967 | -1.16724 | -0.07562 | -0.77412 | -0.87682 | -0.05275 | -0.10273 |
| O15541 | E3 ubiquiti | RNF113A R  | -0.71659 | -0.66011 | -0.75619 | -0.9378  | -0.73872 | -1.08324 | -0.85246 | -1.04703 | -0.42051 | -0.27409 |
| O43143 | Pre-mRNA-   | DHX15 DBF  | 0.456039 | 0.613963 | 0.157625 | 0.226841 | 0.200929 | 0.431339 | 0.743092 | 0.63743  | 0.326258 | 0.137436 |
| O43148 | mRNA cap    | RNMT KIAA  | 0.68451  | 1.032273 | 0.498523 | 0.653618 | 0.706673 | 0.601254 | 0.604851 | 0.714766 | 0.543182 | 0.609827 |
| O43149 | Zinc finger | ZZEF1 KIAA | 0.149576 | -0.39183 | -0.24503 | 0.003899 | -0.43814 | -0.11084 | -0.10661 | -0.13686 | -0.45095 | -0.18046 |
| O43159 | Ribosomal   | RRP8 KIAA  | 0.525265 | 0.377365 | 0.726244 | 0.798257 | 0.523854 | 0.489467 | 0.623341 | 0.595297 | 0.833092 | 0.850663 |
| O43169 | Cytochrom   | CYB5B CYB  | -2.02846 | -1.8852  | -2.50081 | -2.84201 | -2.91526 | -3.61753 | -2.96311 | -1.64608 | -2.07238 | -2.55459 |
| O43172 | U4/U6 sma   | PRPF4 PRP  | -1.09029 | -1.30907 | -1.58303 | -1.23289 | -0.77973 | -1       | -1.26645 | -1.3975  | -1.51372 | -1.54201 |
| O43175 | D-3-phosph  | PHGDH PG   | -0.43539 | -0.20945 | -0.03154 | 0.018696 | 0.168271 | 0.140481 | -0.48134 | -0.1838  | 0.055495 | 0.034976 |
| O43181 | NADH dehy   | NDUFS4     | 0.634165 | 0.553125 | 0.204335 | 0.302131 | 0.127464 | 0.090584 | 0.222186 | -0.06078 | 0.234157 | 0.194858 |
| O43189 | PHD finger  | PHF1 PCL1  | -0.88589 | -0.93222 | -0.67273 | -0.97718 | -0.27    | -0.56331 | -0.83762 | -0.63469 | -0.6325  | -0.43959 |
| O43237 | Cytoplasm   | DYNC1LI2 I | 0.329184 | -0.18265 | 0.625965 | 0.563901 | 0.239291 | 0.263945 | 0.31988  | -0.07039 | 0.214287 | 0.190431 |
| O43242 | 26S protea  | PSMD3      | -0.02828 | 0.155119 | 0.530614 | 0.645806 | 0.614406 | 0.543053 | 0.318649 | 0.552667 | 0.696808 | 0.516905 |
| O43252 | Bifunction  | PAPSS1 AT  | 0.080346 | 0.408446 | -0.401   | -0.13251 | -0.3404  | -0.81085 | -0.45921 | -0.12956 | -0.05128 | -0.19458 |
| O43290 | U4/U6.U5    | SART1      | -1.06193 | -0.95395 | -0.99624 | -1.21613 | -0.95375 | -0.66575 | -0.8687  | -0.83144 | -0.62209 | -0.4524  |
| O43314 | Inositol he | PPIP5K2 HI | -0.25429 | 0.146285 | 0.255165 | 0.069805 | 0.213355 | 0.044559 | 0.073802 | -0.17348 | -0.06922 | 0.176786 |
| O43318 | Mitogen-ac  | MAP3K7 T   | -0.19438 | 0.049819 | 0.393431 | -0.48794 | -0.10806 | -0.07285 | -0.03626 | -0.2091  | 0.023383 | 0.217326 |
| O43324 | Eukaryotic  | EEF1E1 AIN | -0.08542 | -0.07084 | -0.31338 | -0.10985 | -0.31841 | -0.25651 | -0.30515 | -0.25296 | -0.09459 | -0.32811 |
| O43325 | LYR motif-c | LYRM1      | 0.229304 | 0.620903 | 0.465798 | 0.958641 | 0.903913 | 0.983512 | 0.893872 | 0.677356 | 0.218346 | 0.570135 |
| O43390 | Heterogen   | HNRNPR HI  | 0.636564 | 0.672493 | 0.565889 | 0.395284 | 0.45812  | 0.297247 | 0.554387 | 0.407919 | 0.569231 | 0.783271 |
| O43395 | U4/U6 sma   | PRPF3 HPR  | 0.549851 | 0.632828 | 0.438638 | 0.17177  | 0.48755  | 0.453329 | 0.589689 | 0.711347 | 0.473831 | 0.416201 |
| O43396 | Thioredoxi  | TXNL1 TRP  | -0.27063 | -0.22004 | -0.06209 | -0.07615 | -0.18233 | -0.01202 | -0.09153 | 0.121146 | -0.22237 | 0.020529 |
| O43399 | Tumor pro   | TPD52L2    | 0.655929 | 0.988255 | 0.801774 | 0.783867 | 1.022139 | 1.040414 | 0.950561 | 0.917538 | 1.102362 | 1.056413 |
| O43402 | ER membra   | EMC8 C16c  | -2.80735 | -1.58887 | -1.13906 | -1.2909  | -1.15697 | -1.48981 | -1.20881 | -1.65535 | -0.54314 | -0.96502 |
| O43422 | 52 kDa rep  | THAP12 DA  | -0.0183  | 0        | 0.504792 | 0.772895 | 0.739937 | 0.451461 | 0.522227 | 0.427862 | 0.390071 | 0.052151 |
| O43426 | Synaptojan  | SYNJ1 KIAA | -2.80735 | -1.97679 | -3.48699 | -1.82312 | -2.55552 | -2.83494 | -2.09516 | -2.04654 | -2.16993 | -1.66223 |

|        |                               |          |          |          |          |          |          |          |          |          |          |
|--------|-------------------------------|----------|----------|----------|----------|----------|----------|----------|----------|----------|----------|
| O43427 | Acidic fibro FIBP             | 0.984765 | 1.137504 | 1.01744  | 0.906054 | 1.19125  | 1.08231  | 0.880039 | 0.75743  | 0.949626 | 1.293324 |
| O43432 | Eukaryotic EIF4G3             | -0.49427 | -0.3843  | -0.21876 | -0.08386 | -0.40054 | -0.53688 | -0.2757  | -0.32339 | -0.68881 | -0.61343 |
| O43447 | Peptidyl-pr PPIH CYP2C        | 0.165878 | -0.24136 | 1.021288 | 0.63429  | 0.851298 | 1.142958 | 1.072337 | 1.389042 | 0.922521 | 0.798477 |
| O43488 | Aflatoxin B AKR7A2 AF         | -0.94062 | -0.68589 | -2.43078 | -2.0126  | -0.39046 | -0.72247 | -0.17377 | -0.19592 | -2.0287  | -2.07842 |
| O43491 | Band 4.1-lil EPB41L2          | -0.83954 | -0.7176  | -0.50901 | -1.10402 | -0.53382 | -0.57679 | -0.7997  | -0.69188 | -0.52268 | -0.89752 |
| O43493 | Trans-Golgi TGOLN2 TC         | 0.026991 | 0.17552  | 0.016045 | 0.223672 | -0.32093 | 0.102375 | 0.406704 | 0.066926 | 0.024683 | -0.2301  |
| O43513 | Mediator of MED7 ARCA         | 0.777608 | 0.88436  | 1.130819 | 0.439438 | 0.950834 | 0.68012  | 0.709072 | 0.908416 | 0.971431 | 0.938984 |
| O43516 | WAS/WASL WIPF1 WASL           | -0.6002  | -0.69218 | -0.81028 | -0.98751 | -1.06075 | -0.80814 | -0.7997  | -0.53434 | -0.65748 | -0.63448 |
| O43521 | Bcl-2-like protein BCL2L11 BL | -1.80735 | -2.15634 | -2.26459 | -1.84549 | -3.27798 | -2.83494 | -1.55459 | -1.58496 | -1.78165 | -1.82517 |
| O43561 | Linker for alpha LAT          | -0.86581 | -0.84174 | -0.94699 | -1.27433 | -0.6986  | -1.25669 | -1.28813 | -1.13121 | -0.74151 | -0.5153  |
| O43566 | Regulator of RGS14            | 0.04182  | -0.13478 | 0.049819 | -0.02531 | 0.181447 | 0.254814 | -0.02581 | 0.110183 | 0.069042 | 0.122947 |
| O43583 | Density-regulated DENR DRP1   | 0.426519 | 0.440771 | 0.802778 | 0.791523 | 0.96961  | 0.783902 | 0.790363 | 0.740278 | 0.94082  | 0.899783 |
| O43586 | Proline-serine PSTPIP1 CD     | -0.41482 | -0.5484  | -0.12528 | 0.017725 | -0.31964 | -0.30926 | -0.10579 | 0.048813 | -0.31444 | -0.63197 |
| O43598 | 2'-deoxy nucleotide DNPH1 C6c | 0.135214 | 0.323039 | -0.70275 | -0.35542 | -0.15402 | -0.30249 | -0.0495  | -0.29173 | 0.113885 | -0.23677 |
| O43615 | Mitochondrial TIMM44 M        | 0.793983 | 0.827261 | 0.545874 | 0.47793  | 0.32871  | 0.404558 | 0.49794  | 0.460463 | 0.420409 | 0.390712 |
| O43617 | Trafficking TRAPPC3 B         | 0.711848 | 0.822611 | 0.647107 | 0.363881 | 0.416368 | 0.343655 | 0.216853 | 0.344817 | 0.577996 | 0.497464 |
| O43633 | Charged membrane CHMP2A B     | -2.01612 | -1.97993 | -1.53922 | -1.72212 | -1.66918 | -2.04439 | -1.55271 | -1.55514 | -1.11283 | -1.13874 |
| O43660 | Pleiotropic PLRG1             | -2.07357 | -1.52333 | -1.43231 | -2.07012 | -2.1655  | -2.54123 | -2.35391 | -1.93041 | -1.77847 | -1.27927 |
| O43665 | Regulator of RGS10            | -0.00607 | -0.22304 | 0.253253 | 0.638326 | 0.554905 | 1.239088 | 0.712198 | 1.172467 | 1.407948 | 1.131052 |
| O43670 | BUB3-interacting ZNF207 BU    | 0.616393 | 0.677489 | 1.060775 | 1.338286 | 0.84717  | 0.927149 | 1.075532 | 0.931543 | 1.1133   | 1.67364  |
| O43674 | NADH dehydrogenase NDUFB5     | -0.16011 | -0.5427  | -1.64874 | -0.86821 | -1.69302 | -0.86449 | -0.38466 | -1.72935 | -2.04793 | -1.79414 |
| O43676 | NADH dehydrogenase NDUFB3     | 0.26     | -0.08844 | -0.69849 | -0.0973  | -0.45017 | 0.52166  | 0.108376 | 0.251539 | -1.33852 | -0.97369 |
| O43678 | NADH dehydrogenase NDUFA2     | -0.2949  | -0.11353 | 1.329628 | 1.224613 | 1.15831  | 1.328471 | 1.210736 | 1.237579 | 1.23246  | 1.140138 |
| O43681 | ATPase gamma GET3 ARSA        | 0.326217 | 0.476081 | -0.02488 | -0.1235  | -0.05057 | -0.33428 | 0.045145 | -0.57149 | -0.32278 | -0.11919 |
| O43684 | Mitotic checkpoint BUB3       | 0.486494 | 0.657397 | 0.124933 | 0.068901 | 0.069083 | 0.190847 | 0.237236 | 0.427157 | 0.31809  | 0.236376 |
| O43704 | Sulfotransferase SUL1B1 S     | -1.14049 | -0.85422 | -0.64662 | -0.92226 | -0.39287 | -0.04722 | -0.85084 | -0.79864 | 0.021344 | -0.02909 |
| O43707 | Alpha-actinin ACTN4           | 0.937045 | 0.795048 | 0.101614 | 0.572362 | -0.47914 | 0.100264 | 0.368243 | 0.406657 | -0.74188 | -0.62797 |
| O43715 | TP53-regulator TRIAP1 15E     | -1.1669  | -1.09675 | -1.04757 | -1.2909  | -1.57755 | -1.85457 | -1.52484 | -1.08246 | -0.9906  | -1.66223 |
| O43716 | Glutamyl-tRNA GATC 15E1       | -1.60942 | -1.72403 | -1.53138 | -1.15899 | -1.76702 | -1.74061 | -3.01027 | -1.50155 | -1.54314 | -1.63448 |
| O43719 | HIV Tat-specific HTATSF1      | -0.48543 | -0.152   | -0.18791 | -0.36167 | -0.13992 | -0.0383  | -0.30035 | -0.78746 | 0.001308 | -0.09471 |
| O43747 | AP-1 component AP1G1 ADT      | -1.1004  | -1.35347 | -0.04757 | -0.51457 | -0.46036 | -0.11958 | -0.30035 | 0.146841 | -0.13327 | -0.2402  |
| O43752 | Syntaxin-6 STX6               | -1.25096 | -0.97679 | -1.37151 | -1.5787  | -1.64572 | -0.59318 | -1.31937 | -0.69188 | -1.2687  | -1       |
| O43765 | Small glutathione SGTA SGT 5  | 0.142817 | 0.173343 | 0.110783 | 0.251619 | 0.538431 | 0.104136 | 0.329113 | 0.145561 | 0.357247 | 0.389281 |

|        |                         |          |          |          |          |          |          |          |          |          |          |
|--------|-------------------------|----------|----------|----------|----------|----------|----------|----------|----------|----------|----------|
| O43768 | Alpha-endc ENSA         | 1.072623 | 1.191905 | 0.989138 | 1.103796 | 1.080779 | 0.782676 | 1.177615 | 1.068921 | 1.132294 | 1.219239 |
| O43772 | Mitochond SLC25A20 (    | 1.547871 | 1.292214 | -0.15791 | 0.071017 | -0.58054 | -0.01998 | 0.309926 | 0.096323 | -1.01177 | -1.38041 |
| O43776 | Asparagine NARS1 NAF    | 0.324351 | 0.288798 | 0.378512 | 0.231326 | 0.007417 | 0.125531 | 0.31988  | 0.246722 | 0.649503 | 0.929721 |
| O43809 | Cleavage at NUDT21 CF   | 0.827215 | 0.955961 | -0.01233 | 0.019169 | 0.107446 | 0.155278 | 0.300624 | 0.207059 | -0.03339 | 0.03065  |
| O43813 | Glutathione LANCL1 GP   | 0.214445 | 0.251318 | 0.440794 | 0.373646 | 0.523634 | 0.284621 | 0.501558 | 0.633098 | 0.800388 | 0.816135 |
| O43815 | Striatin STRN           | 0.620882 | 0.377651 | 0.569776 | 0.563901 | 0.286657 | 0.420894 | 0.428253 | 0.615177 | 0.688056 | 0.954977 |
| O43818 | U3 small nt RRP9 RNU3   | 0.535635 | 0.53216  | 0.661756 | 0.759291 | 1.009388 | 0.634893 | 1.189124 | 0.895868 | 0.532314 | 0.735921 |
| O43819 | Protein SC(ESCO2        | -3.25096 | -2.48699 | -1.90202 | -2.84549 | -2.89947 | -3.04439 | -1.73016 | -3.33342 | -2.21299 | -3.26127 |
| O43823 | A-kinase ar AKAP8 AKA   | -0.0563  | 0.250779 | -0.22037 | -0.27308 | 0.225949 | -0.31116 | 0.231942 | -0.10752 | -0.17255 | -0.03521 |
| O43824 | Putative GTPBP6 PG      | 0.812541 | 0.618366 | 0.641046 | 0.630243 | 0.354283 | 0.095157 | 0.981982 | 1.064379 | 1.018737 | 0.843565 |
| O43829 | Zinc finger ZBTB14 ZFF  | -2.19545 | -2.69208 | -2.72081 | -2.95317 | -1.17365 | -0.66069 | -1.11718 | -1.02308 | -2.53695 | -2.35155 |
| O43847 | Nardilysin (NRDC NRDC   | -2.68536 | -1.4761  | -1.5427  | -1.02531 | -1.45017 | -1.68684 | -3.61599 | -2.04654 | -1.46297 | -2.13927 |
| O43852 | Calumenin CALU          | -0.85042 | -0.69082 | 0.680507 | 0.752071 | -1.14459 | -1.24998 | -1.20881 | -1.22239 | -0.97199 | -0.69015 |
| O43865 | S-adenosyl AHCYL1 DC    | -1.18057 | -0.42286 | 0.529314 | 0.542527 | 0.178819 | 0.367793 | -1.84989 | -1.73588 | -1.53475 | -1.15607 |
| O43914 | TYRO prote TYROBP DA    | -1.45187 | -3.4021  | -1.91667 | -1.73697 | -1.76702 | -1.72247 | -3.09516 | -1.88982 | -2.10764 | -2.19898 |
| O43920 | NADH dehy NDUFS5        | 0.376645 | 0.240108 | 0.034673 | 0.15451  | -0.50188 | 0.475242 | 0.471473 | 0.251539 | -0.30319 | -0.56737 |
| O60216 | Double-str RAD21 HR23   | -0.9395  | -0.67755 | -0.7733  | -0.75803 | -0.58908 | -1.02032 | -0.67492 | -0.85834 | -0.71049 | -0.29754 |
| O60220 | Mitochond TIMM8A DI     | -1.45035 | -1.74279 | -0.5225  | -1.46368 | -2.2571  | -1.53234 | -1.41653 | -1.90304 | -0.38065 | -0.55186 |
| O60231 | Pre-mRNA- DHX16 DBF     | -0.50434 | -0.50607 | -0.53691 | -0.52359 | -0.69911 | -0.37447 | -0.52525 | -0.58175 | -0.606   | -0.57432 |
| O60232 | Protein ZNIZNRD2 SSS1   | 0.171271 | 0.023207 | 0.440162 | 0.176878 | -0.12418 | 0.203533 | 0.31988  | 0.067114 | 0.018737 | 0.174834 |
| O60234 | Glia matur GMFG         | 0.183209 | 0.128843 | 0.773351 | 0.590666 | -0.18039 | -0.20968 | -0.4402  | -0.28697 | -0.14535 | -0.07334 |
| O60256 | Phosphorik PRPSAP2      | 0.002867 | 0.145752 | 0.046929 | -0.18594 | 0.247333 | 0.355663 | 0.207441 | 0.110309 | 0.513322 | 0.605679 |
| O60262 | Guanine nt GNG7 GNG     | 0.730891 | 0.930098 | -0.19153 | -0.71621 | -0.59991 | -0.33015 | 0.222392 | 0.152003 | -0.22948 | -0.42392 |
| O60264 | SWI/SNF-re SMARCA5 S    | 0.272896 | 0.214093 | -0.22496 | -0.07757 | -0.18588 | 0.022783 | 0.305197 | 0.158638 | -0.13198 | -0.19797 |
| O60271 | C-Jun-amin SPAG9 HSS    | -0.83502 | -0.50768 | -0.32462 | -0.55318 | -0.18206 | -0.1315  | -0.71246 | -0.4122  | -0.58524 | -0.45265 |
| O60282 | Kinesin hea KIF5C KIAA  | -0.48136 | -0.80502 | -0.09394 | -0.10984 | 0.020483 | -0.00912 | -0.08041 | -0.30986 | -0.44699 | -0.49386 |
| O60306 | RNA helica AQR KIAA0    | 0.187331 | 0.477047 | 0.141044 | 0.170242 | -0.38315 | -0.13728 | -0.02429 | 0.160964 | 0.081251 | 0.487322 |
| O60307 | Microtubul MAST3 KIA    | -1.33251 | -0.97108 | -1.09264 | -0.88811 | -0.51998 | -0.65377 | -0.79107 | -0.73248 | -1.06304 | -1.07263 |
| O60308 | Centrosom CEP104 KIA    | -0.08104 | -0.16506 | 0.101614 | -0.15899 | -0.02248 | 0.169925 | 0.368243 | 0.340133 | -0.05772 | -0.45998 |
| O60313 | Dynamini OPA1 KIAA0     | 0.1385   | 0.181961 | 0.105794 | 0.049328 | 0.291151 | 0.250227 | 0.244153 | 0.360809 | 0.519575 | 0.382484 |
| O60318 | Germinal-c MCM3AP C     | -2.72489 | -1.63656 | -0.97679 | -0.72655 | -0.92749 | -0.52869 | -0.65574 | -0.76783 | -0.89984 | -0.64829 |
| O60333 | Kinesin-like KIF1B KIAA | -3.1429  | -2.68116 | -2.30243 | -2.19962 | -2.89947 | -2.04439 | -1.30666 | -2.02308 | -3.20313 | -2.01784 |
| O60341 | Lysine-spec KDM1A AO    | -0.21138 | 0.104095 | 0.363436 | 0.476438 | 0.57516  | 0.483078 | 0.677854 | 0.63005  | 0.115835 | 0.090973 |

|        |                        |          |          |          |          |          |          |          |          |          |          |
|--------|------------------------|----------|----------|----------|----------|----------|----------|----------|----------|----------|----------|
| O60449 | Lymphocyt LY75 CD20!   | 0.419348 | 0.822918 | 0.839694 | 0.971604 | 0.559967 | 0.848211 | 0.657327 | 0.583654 | 0.279892 | 0.166088 |
| O60488 | Long-chain ACSL4 ACS!  | -1.06193 | -1.19153 | -0.70483 | -1.03814 | -1.87199 | -0.86449 | -0.83577 | -1.05842 | -1.54314 | -1.50324 |
| O60493 | Sorting nex SNX3       | 0.667425 | 0.668291 | 0.954448 | 0.948926 | 0.652753 | 0.595851 | 0.415037 | 0.561879 | 0.905003 | 1.024137 |
| O60496 | Docking pri DOK2       | -0.0747  | 0.210086 | 0.06084  | 0.192021 | 0.100527 | 0.19878  | 0.288683 | 0.23756  | 0.081513 | 0.064991 |
| O60502 | Protein O-(OGA HEXC    | -0.23456 | -0.12758 | -0.0096  | 0.011337 | -0.0067  | 0.203252 | -0.16992 | -0.01395 | 0.058655 | 0.124491 |
| O60504 | Vinexin (SHSORBS3 SC   | -4.08746 | -3.32193 | -3.24598 | -2.56009 | -2.84503 | -2.83494 | -2.89162 | -1.848   | -3.5025  | -2.30433 |
| O60506 | Heterogen SYNCRIP HI   | 0.996966 | 1.107054 | 0.577143 | 0.709099 | 0.862154 | 0.559227 | 0.913017 | 0.780235 | 0.728454 | 0.925067 |
| O60508 | Pre-mRNA- CDC40 EHB    | -0.38702 | -0.42809 | -0.6734  | -0.73936 | -0.5225  | -0.40777 | -0.77323 | -0.2978  | -0.06263 | -0.19391 |
| O60524 | Nuclear exp NEMF SDC   | 1.47587  | 1.025125 | 1.443033 | 1.220599 | 1.391609 | 1.358618 | 1.209177 | 0.988504 | 1.014075 | 2.122947 |
| O60547 | GDP-mann GMDS          | -0.09597 | -0.24485 | -0.55403 | -1.15472 | -0.03694 | -0.35047 | -0.18785 | -0.33827 | -0.14981 | 0.036707 |
| O60551 | Glycylpepti NMT2       | 0.043124 | 0.23101  | 0.274822 | 0.480687 | 0.827296 | 0.789827 | 0.68109  | 0.688056 | 0.562332 | 0.790379 |
| O60573 | Eukaryotic EIF4E2 EIF4 | -1.55497 | -1.42286 | -1.5541  | -0.06413 | -1.06075 | -1.24998 | -1.30666 | -1.60224 | -1.848   | -1.69052 |
| O60610 | Protein dia DIAPH1 DI! | 0.532267 | 0.604053 | 0.628095 | 0.487539 | 0.464303 | 0.661484 | 0.453377 | 0.666486 | 0.597041 | 0.701015 |
| O60645 | Exocyst cor EXOC3 SEC  | 0.290058 | 0.369485 | 0.648528 | 0.646363 | 1.054723 | 0.909802 | 0.788227 | 0.436348 | 0.643479 | 0.733421 |
| O60664 | Perilipin-3 PLIN3 M6P  | -0.88359 | -0.20046 | -0.19153 | -0.35364 | -0.28703 | -0.35091 | 0.055206 | -0.05252 | -0.44361 | -0.08663 |
| O60669 | Monocarbo SLC16A7 M    | -0.87245 | -0.96153 | -0.77649 | -0.74746 | -0.5231  | -0.54455 | -0.66382 | -0.60224 | -0.67996 | -1.06333 |
| O60675 | Transcriptio MAFK      | -0.94062 | -1.19153 | -0.43862 | -1.35364 | -1.53382 | -1       | -0.81762 | -0.82753 | -1.00946 | -1.22979 |
| O60684 | Importin st KPNA6 IPO  | -0.23311 | -0.1607  | -1.68589 | -1.3377  | -0.6293  | -0.72955 | -0.45305 | -1.21001 | -0.75756 | -0.60058 |
| O60711 | Leupaxin LPXN LDLP     | -0.70499 | -1.11471 | -1.04757 | -0.97513 | -0.85845 | -1.11366 | -0.67195 | -0.72935 | -1.03822 | -0.84093 |
| O60725 | Protein-S-is ICMT PCCN | -0.16011 | -0.90933 | -0.69218 | 0.555389 | -0.59991 | 0.105353 | -0.81762 | 0.498454 | -0.63534 | 0.127005 |
| O60749 | Sorting nex SNX2 TRG9  | 0.409646 | 0.511434 | 0.488253 | 0.256449 | 0.519481 | 0.386825 | 0.340625 | 0.429775 | 0.642288 | 0.590313 |
| O60759 | Cytohesin-i CYTIP PSCD | -1.40296 | -1.57719 | -1.43335 | -1.2909  | -1.22487 | -0.95693 | -1.20881 | -1.93289 | -1.07748 | -1.0726  |
| O60763 | General ve: USO1 VDP   | 0.124706 | 0.390349 | 0.41632  | 0.262087 | 0.407729 | 0.135515 | 0.384011 | -0.02302 | -0.01228 | 0.291517 |
| O60783 | 28S ribosor MRPS14     | -1.38702 | -1.43335 | -1.42286 | -2.89129 | -1.51245 | -1.40054 | -1.39808 | -1.74846 | -1.46297 | -1.56737 |
| O60784 | Target of IV TOM1      | -0.87681 | -0.78665 | -0.23948 | -0.3677  | -0.50382 | -0.56682 | -0.81041 | -0.73706 | -0.32914 | -0.33594 |
| O60826 | Coiled-coil CCDC22 CX  | 0.280108 | 0.847997 | 0.633525 | 0.84101  | 0.766409 | 0.377671 | 0.736966 | 0.367016 | 0.197939 | 0.622815 |
| O60828 | Polyglutam PQBP1 NPV   | 1.07338  | 1.132739 | -1.67311 | -1.65141 | 0.717422 | 0.144686 | -1.66238 | -1.43553 | -1.819   | -1.20132 |
| O60832 | H/ACA ribo DKC1 NOLA   | 0.741807 | 0.713292 | 0.317241 | 0.266511 | 0.544664 | 0.39151  | 0.446467 | 0.311862 | 0.731297 | 1.094215 |
| O60841 | Eukaryotic EIF5B IF2 K | 0.334001 | 0.332805 | 0.589594 | 0.629247 | 0.534513 | 0.498638 | 0.608945 | 0.51056  | 0.457226 | 0.445688 |
| O60869 | Endothelial EDF1       | 0.833103 | 0.903247 | 0.830562 | 0.765535 | 1.061865 | 0.835189 | 0.929227 | 0.603921 | 0.819428 | 1.302324 |
| O60879 | Protein dia DIAPH2 DI! | -0.13327 | -0.03154 | -0.16069 | 0.339385 | -0.49139 | 0.021695 | -0.33865 | -0.25618 | -0.38087 | -0.12473 |
| O60880 | SH2 domai SH2D1A DS    | 1.211278 | 1.369451 | 1.119104 | 1.026506 | 1.14478  | 1.294029 | 1.257914 | 1.432382 | 0.82937  | 0.737403 |
| O60884 | DnaJ homo DNAJA2 CP    | 0.895716 | 0.986288 | 1.314381 | 1.044232 | 1.207442 | 1.138    | 1.180121 | 1.336644 | 1.289507 | 1.004419 |

|        |                        |          |          |          |          |          |          |          |          |          |          |
|--------|------------------------|----------|----------|----------|----------|----------|----------|----------|----------|----------|----------|
| O60885 | Bromodom BRD4 HUNI     | 0.199882 | 0.396174 | 0.651384 | 0.511511 | 0.792405 | 0.330645 | 0.654865 | 0.644772 | 0.781531 | 0.945893 |
| O60888 | Protein Cut CUTA ACH/  | -0.69348 | -1.14147 | -1.42036 | -1.12402 | -1.86002 | -1.3767  | -1.19333 | -1.29617 | -1.08316 | -1.02287 |
| O60907 | F-box-like/ TBL1X TBL1 | -3.64689 | -3.28345 | -0.87317 | -0.71621 | -1.31451 | -1.07861 | -0.87276 | -0.63743 | -0.76553 | -0.32082 |
| O60925 | Prefoldin s1 PFDN1 PFD | 0.712503 | 1.018038 | 1.211761 | 1.015173 | 0.684392 | 0.882111 | 0.845738 | 0.921981 | 1.24312  | 1.074703 |
| O60927 | E3 ubiquitin PPP1R11 H | -2.29713 | -2.54346 | -2.14419 | -2.58764 | -2.00655 | -1.72642 | -2.056   | -1.58496 | -2.20215 | -1.65823 |
| O60934 | Nibrin (Cell NBN NBS N | 0.495952 | 0.430625 | 0.682606 | 0.745693 | 0.723985 | 0.673954 | 0.493403 | 0.461626 | 0.617586 | 0.775789 |
| O60942 | mRNA-cap1 RNGTT CAF    | -0.54709 | -0.53559 | -1.24027 | -1.05269 | -1.06054 | -1.4829  | -1.31987 | -1.30562 | -1.48177 | -1.45252 |
| O75027 | ATP-bindin ABCB7 ABC   | -1.80735 | -1.93147 | -2.75002 | -1.69574 | -2.59991 | -1.91511 | -1.66382 | -1.74846 | -3.3505  | -3.54137 |
| O75044 | SLIT-ROBO SRGAP2 AR    | -2.04114 | -1.48769 | -1.88763 | -2.71376 | -1.90941 | -2.33074 | -2.06464 | -2.72579 | -3.24655 | -3.11022 |
| O75083 | WD repeat WDR1         | 0.341114 | 0.507225 | 0.412639 | 0.30566  | 0.411314 | 0.250578 | 0.489805 | 0.141661 | 0.789125 | 0.484592 |
| O75113 | NEDD4-bin N4BP1 KIA/   | -0.46855 | -0.18709 | 0.151613 | -0.19444 | -0.269   | 0.110424 | -0.22666 | -0.19592 | 0.023383 | -0.73402 |
| O75116 | Rho-associi ROCK2 KIA/ | -1.10879 | -1.24846 | -0.62203 | -0.99761 | -1.26271 | -0.78014 | -1.34114 | -1.53003 | -1.06956 | -1.07423 |
| O75122 | CLIP-associ CLASP2 KIA | -0.63743 | -0.68306 | -0.5242  | -0.77344 | -0.85249 | -0.6372  | -0.4957  | -0.50164 | -0.51592 | -0.69052 |
| O75131 | Copine-3 (CPNE3 CPN    | -0.37126 | -0.29298 | -0.10932 | -0.04459 | -0.02248 | -0.06711 | 0        | -0.26303 | -0.04307 | -0.296   |
| O75143 | Autophagy ATG13 KIA/   | -2.92356 | -3.07232 | -1.72403 | -1.47045 | -1.12418 | -1.38618 | -1.83577 | -1.07039 | -1.4245  | -1.06333 |
| O75146 | Huntingtin- HIP1R HIP1 | -1.05097 | -0.25282 | -0.07195 | -0.2986  | -0.88234 | -1.09604 | -0.78189 | -0.86569 | -1.38702 | -1.04495 |
| O75150 | E3 ubiquitin RNF40 BRE | -0.81503 | -0.54033 | -0.79426 | -0.5283  | -0.75732 | -0.93413 | -1.08486 | -0.60402 | -0.46953 | -0.58801 |
| O75151 | Lysine-spec PHF2 CENP  | -0.9523  | -0.74348 | -0.98449 | -0.85681 | -1.03006 | -1.03317 | -1.24473 | -0.95491 | -0.67996 | -0.73402 |
| O75152 | Zinc finger ZC3H11A K  | -0.52293 | -0.43818 | -0.51668 | -0.68872 | -0.24103 | -0.59218 | -0.62405 | -0.63359 | -0.25256 | -0.4064  |
| O75157 | TSC22 dom TSC22D2 KI   | -1.13163 | -1.55256 | -0.98628 | -0.98489 | -1.04467 | -1.15643 | -2.16995 | -0.77272 | -1.12605 | -1.16968 |
| O75167 | Phosphata: PHACTR2 C   | 0.446899 | 0.362589 | -1.52025 | -1.85494 | -1.78875 | -1.801   | -1.53083 | -1.39262 | -2.05005 | -1.64582 |
| O75170 | Serine/thre PPP6R2 KIA | -2.77868 | -1.77394 | -1.89199 | -2.91865 | -1.72358 | -2.40895 | -2.93095 | -2.52858 | -2.44084 | -2.54092 |
| O75175 | CCR4-NOT CNOT3 KIA.    | -1.94591 | -1.40449 | -1.45026 | -1.96586 | -1.90745 | -2.03047 | -1.76598 | -1.72172 | -1.98274 | -1.48514 |
| O75190 | DnaJ homo DNAJB6 HS    | -0.66935 | -0.81809 | -0.70826 | -0.716   | -1.34784 | -0.25724 | -0.95671 | -1.01998 | -0.98716 | -1.03779 |
| O75208 | Ubiquinone COQ9 C16c   | -1.96017 | -1.71905 | -1.09485 | -1.41767 | -1.19523 | -1.14658 | -1.84199 | -1.71983 | -1.06506 | -0.97411 |
| O75223 | Gamma-glγ GGCT C7or    | 1.508501 | 1.662391 | 1.106863 | 1.373335 | 1.376589 | 1.567105 | 1.371712 | 1.308822 | 1.209941 | 0.848888 |
| O75251 | NADH dehy NDUFS7       | -0.18057 | -0.27399 | 0.291986 | -0.28325 | -0.34252 | -0.30293 | -0.28157 | -0.52607 | -0.05282 | -0.26127 |
| O75306 | NADH dehy NDUFS2       | 0.187331 | -0.03154 | 0.348202 | 0.383329 | -0.19903 | 0.250227 | 0.846291 | 0.222392 | 0.230452 | 0.265982 |
| O75312 | Zinc finger ZPR1 ZNF2! | -1.20893 | -1.20813 | -0.19519 | -0.15733 | -0.27869 | -0.39076 | -0.6029  | -0.03369 | -0.11317 | -0.01881 |
| O75319 | RNA/RNP c DUSP11 PIF   | -0.30986 | -0.23217 | 0.199938 | 0.079322 | 0.360089 | 0.290996 | 0.030374 | 0.172467 | 0.230452 | -0.04495 |
| O75323 | Protein Nip NIPSNAP2 ( | -0.69515 | -1.18265 | -0.73048 | 0.182416 | -0.89947 | -0.64351 | -1.02061 | -1.74846 | -0.85651 | -0.59384 |
| O75347 | Tubulin-spγ TBCA       | 0.469096 | 0.482639 | 0.717626 | 0.424288 | 0.524208 | 0.419825 | 0.510276 | 0.648429 | 0.955568 | 0.881982 |
| O75348 | V-type prot ATP6V1G1   | 0.006049 | -0.53703 | -0.13906 | 0.304257 | 0.762031 | 0.525461 | 0.244153 | 0.534473 | 0.382857 | 0.056413 |

|        |              |            |          |          |          |          |          |          |          |          |          |          |
|--------|--------------|------------|----------|----------|----------|----------|----------|----------|----------|----------|----------|----------|
| O75351 | Vacuolar pi  | VPS4B SKD  | 0.843081 | 0.749307 | 0.958013 | 0.520826 | 0.848939 | 0.590571 | 0.96407  | 0.802677 | 0.797578 | 0.784784 |
| O75367 | Core histor  | MACROH2/   | 1.128947 | 0.948399 | 0.675633 | 0.653816 | 0.800967 | 0.810474 | 0.958481 | 0.962299 | 0.725606 | 0.821197 |
| O75368 | SH3 domai    | SH3BGRL    | 1.085361 | 1.352068 | 0.673246 | 0.899344 | 0.917143 | 0.895852 | 0.82717  | 0.630761 | 0.760868 | 0.662391 |
| O75369 | Filamin-B (I | FLNB FLN1I | -0.25819 | -0.26929 | -0.61375 | -0.55813 | -0.56649 | -0.61813 | -0.68834 | -0.54287 | -0.02713 | 0.0399   |
| O75376 | Nuclear rec  | NCOR1 KIA  | -1.25821 | -1.02367 | -0.53288 | -0.32201 | -0.87728 | -0.31284 | -0.84461 | -0.94786 | -0.44873 | -0.44576 |
| O75380 | NADH dehy    | NDUFS6     | 1.471504 | 1.174251 | 1.515742 | 1.220599 | 1.348454 | 1.217701 | 1.428405 | 1.197646 | 1.489126 | 1.518551 |
| O75390 | Citrate syn  | CS         | 1.151365 | 1.28613  | 1.0275   | 0.819758 | 0.530983 | 0.871144 | 0.86022  | 0.832276 | 0.891398 | 0.881027 |
| O75391 | Sperm-assc   | SPAG7      | -1.60942 | -1.08459 | -1.84488 | -2.0906  | -1.81855 | -2.02203 | -2.05209 | -1.848   | -1.64268 | -1.66223 |
| O75394 | 39S ribosor  | MRPL33 C2  | 1.796926 | 1.545434 | 1.70941  | 2.120294 | 2.18799  | 2.044394 | 2.224583 | 2.177538 | 2.244449 | 2.156091 |
| O75396 | Vesicle-traf | SEC22B SEC | 0.481856 | 0.591764 | 0.348407 | -0.0409  | 0.270452 | 0.06755  | 0.124233 | -0.02409 | -0.18224 | -0.13919 |
| O75398 | Deformed (   | DEAF1 SPN  | -1.60234 | -1.70233 | -1.16689 | -0.9371  | -1.04696 | -1.33494 | -1.19895 | -1.29248 | -0.75607 | -1.03405 |
| O75400 | Pre-mRNA-    | PRPF40A FI | 0.052591 | 0.215179 | 0.153059 | 0.099434 | 0.231675 | 0.195257 | 0.025347 | 0.272648 | 0.334905 | 0.082081 |
| O75410 | Transformi   | TACC1 KIA/ | -0.25819 | -0.75002 | 0.083328 | -0.36976 | -0.28703 | -0.33015 | -0.51019 | -0.71989 | -0.58496 | -0.68339 |
| O75420 | GRB10-inte   | GIGYF1 CD/ | -0.72712 | -0.56196 | -0.12996 | -0.52165 | -0.47907 | -0.58254 | -0.4057  | -0.49914 | -0.24612 | -0.39834 |
| O75427 | Leucine-ric  | LRCH4 LRN  | -0.96094 | -0.91549 | -0.65232 | -0.65634 | -0.61883 | -0.69863 | -1.16291 | -0.82439 | -0.75756 | -0.56383 |
| O75431 | Metaxin-2 (  | MTX2       | -0.98556 | -1.01689 | -1.11104 | -1.4354  | -1.33234 | -0.83782 | -0.87932 | -1.1705  | -1.10099 | -1.03824 |
| O75436 | Vacuolar pi  | VPS26A VP  | -0.99169 | -0.86459 | -1.19844 | -0.77691 | -1.55784 | -1.70027 | -1.24438 | -1.42473 | -1.08746 | -1.05267 |
| O75438 | NADH dehy    | NDUFB1     | 0.093867 | -0.25992 | -0.63656 | -0.44461 | -0.51245 | -0.10776 | -0.32577 | -0.60224 | -1.57089 | -1.45391 |
| O75439 | Mitochond    | PMPCB MP   | -0.60865 | -0.62861 | -0.26984 | -0.24146 | -0.8308  | -0.33552 | -0.53803 | -0.28771 | -0.30941 | -0.38299 |
| O75446 | Histone de   | SAP30      | -2.80735 | -1.7112  | -1.53138 | -2.9386  | -1.15697 | -2.02203 | -2.01027 | -1.88982 | -2.1913  | -1.6763  |
| O75448 | Mediator o   | MED24 AR/  | -1.39844 | -1.75229 | -1.24456 | -1.01929 | -1.81214 | -1.96493 | -1.66391 | -1.53596 | -0.83357 | -0.46969 |
| O75475 | PC4 and SF   | PSIP1 DFS7 | 0.633852 | 0.6277   | 0.569281 | 0.421228 | 0.816551 | 0.554334 | 0.808816 | 0.608778 | 0.353892 | 0.377742 |
| O75489 | NADH dehy    | NDUFS3     | -0.06428 | 0.139013 | 0.276358 | 0.365509 | 0.173775 | 0.346081 | 0.509757 | 0.201548 | 0.338045 | 0.502909 |
| O75494 | Serine/argi  | SRSF10 FU/ | 0.996727 | 1.271794 | 1.184581 | 1.38938  | 1.284396 | 0.949227 | 1.35121  | 1.278805 | 1.155721 | 1.37749  |
| O75506 | Heat shock   | HSBP1 HSF  | -0.78629 | -0.41764 | -1.19153 | -0.7794  | -1.35199 | -0.59318 | -0.52484 | -0.41504 | -0.37474 | -1.09134 |
| O75521 | Enoyl-CoA (  | ECI2 DRS1  | -0.6002  | -0.54839 | -0.25526 | -0.32979 | -0.12418 | -0.58496 | -0.43219 | -0.20249 | -0.24616 | -0.01781 |
| O75528 | Transcripti  | TADA3 AD/  | -3.30986 | -1.58887 | -2.58359 | -2.77062 | -1.07635 | -1.07861 | -1.01027 | -1.26303 | -2.75493 | -2.06309 |
| O75529 | TAF5-like R  | TAF5L PAF/ | -1.76553 | -1.93147 | -1.63656 | -3.67557 | -3.69302 | -1.72247 | -1.41163 | -2.848   | -2.16993 | -1.80957 |
| O75531 | Barrier-to-  | BANF1 BAF  | 1.109262 | 1.105458 | 1.262208 | 1.10693  | 1.259691 | 1.484954 | 1.240434 | 1.14689  | 0.726568 | 0.622022 |
| O75533 | Splicing fac | SF3B1 SAP/ | 0.244734 | 0.558731 | 0.206711 | 0.216116 | 0.43351  | 0.389848 | 0.302796 | 0.289507 | 0.371969 | 0.611274 |
| O75534 | Cold shock   | CSDE1 D1S  | -0.21444 | -0.02008 | 0.094309 | -0.01416 | 0.116327 | 0.370901 | 0.207456 | 0.097306 | 0.271073 | -0.20142 |
| O75554 | WW domai     | WBP4 FBP/  | 0.165878 | 0.034673 | 0.763239 | 0.981058 | 0.534513 | 0.778973 | 0.564352 | 0.607683 | 0.751041 | 0.725413 |
| O75558 | Syntaxin-1:  | STX11      | -3.03684 | -1.68589 | -1.5427  | -1.89129 | -3.2076  | -1.87447 | -1.782   | -3.07039 | -2.21299 | -4.44184 |

|        |                                           |          |          |          |          |          |          |          |          |          |          |
|--------|-------------------------------------------|----------|----------|----------|----------|----------|----------|----------|----------|----------|----------|
| O75564 | Jerky prote JRK JH8                       | -1.43539 | -0.8519  | -0.79667 | -0.91475 | -1.07635 | -0.40777 | -0.60817 | -1.07039 | -0.74959 | -0.93088 |
| O75569 | Interferon- PRKRA PAC                     | 0.018072 | 0.342063 | 0.597902 | 1.085247 | -0.09212 | 0.577658 | 0.584963 | -0.25618 | 0.060025 | 0.202019 |
| O75582 | Ribosomal RPS6KA5 M                       | 1.149576 | 1.149857 | 0.970456 | 1.215206 | 1.294905 | 1.337149 | 1.204745 | 1.005714 | 0.853748 | 0.803557 |
| O75592 | E3 ubiquitin MYCBP2 KI                    | -1.34023 | -1.00782 | -0.61252 | -0.87971 | -0.59996 | -0.66069 | -0.80863 | -0.85834 | -0.50603 | -1.01781 |
| O75608 | Acyl-protein LYPLA1 AP1                   | -0.22992 | -0.20042 | 0.089228 | -0.21195 | -0.07601 | 0.124556 | -0.03    | 0.132904 | 0.156392 | -0.12114 |
| O75643 | U5 small nuclear SNRNP200                 | 0.239609 | 0.437285 | 0.068531 | -0.00629 | -0.12418 | 0.134476 | 0.017687 | 0.157064 | 0.165126 | 0.186547 |
| O75663 | TIP41-like protein TIPRL                  | 0.099436 | 0.111753 | -0.28668 | -0.50663 | -0.18853 | -0.52973 | -0.30095 | -0.17735 | -0.15454 | -0.25441 |
| O75683 | Surfeit locus SURF6 SUR                   | -0.27277 | -0.16506 | -0.14336 | -0.32193 | -0.1161  | -0.24998 | -0.0897  | -0.50155 | -0.14886 | 0.127005 |
| O75688 | Protein phosphatase PPM1B PP2             | 0.314636 | 0.437285 | 0.852365 | 0.613942 | 0.67155  | 0.595851 | 0.445411 | 0.733527 | 1.069042 | 1.047877 |
| O75694 | Nuclear pore NUP155 KL                    | -0.68619 | -0.47078 | -0.55029 | -0.74217 | -0.45188 | -0.613   | -1.782   | -1.33342 | -1.54314 | -1.66223 |
| O75695 | Protein XRI RP2                           | -2.64689 | -1.78991 | -3.28345 | -3.32193 | -3.69302 | -2.75899 | -2.18536 | -1.78746 | NA       | NA       |
| O75746 | Calcium-binding SLC25A12 M                | 0.007676 | 0.154702 | -0.29904 | -0.18087 | -0.3234  | -0.1144  | -0.37404 | -0.49748 | -0.55014 | -0.29729 |
| O75764 | Transcription factor TCEA3 TFII           | -0.23661 | -0.30256 | -0.31706 | -0.22344 | -0.42    | -0.52083 | -0.08427 | -0.0115  | 0.360998 | 0.419456 |
| O75791 | GRB2-related GRAP2 GAI                    | 1.229304 | 1.393431 | 0.206711 | 0.263034 | 0.007417 | 0.369234 | 0.136573 | 0.227291 | 0.368321 | 0.284267 |
| O75792 | Ribonucleic RNASEH2A                      | 0.461282 | 0.573412 | 0.53061  | 0.527871 | 0.254026 | 0.389662 | 0.55388  | 0.554222 | 0.348312 | 0.257272 |
| O75808 | Calpain-15 CAPN15 SC                      | -3.89482 | -4.83094 | -4.07195 | -4.03814 | NA       | NA       | NA       | NA       | -3.79796 | -3.49075 |
| O75817 | Ribonucleic POP7 RPP2                     | 0.235256 | 0.201912 | 0.167147 | 0.073373 | 0.17121  | -0.00582 | -0.32898 | 0.077635 | 0.46596  | 0.646069 |
| O75818 | Ribonucleic RPP40 RNA                     | -2.00127 | -1.57214 | -2.22518 | -1.96763 | -1.91131 | -1.47175 | -2.48995 | -2.73135 | -1.83907 | -2.04877 |
| O75821 | Eukaryotic EIF3G EIF3C                    | 0.79518  | 0.690675 | 1.040371 | 0.783867 | 0.50935  | 1.013598 | 0.863264 | 0.662965 | 1.037233 | 0.767616 |
| O75822 | Eukaryotic EIF3J EIF3S                    | 0.584005 | 0.67319  | -0.12326 | -0.2909  | 0.181447 | -0.52083 | -0.1452  | 0.190694 | -0.24058 | 0.021959 |
| O75828 | Carbonyl reductase CBR3                   | -0.20243 | -0.15729 | -0.64874 | -0.69574 | 0.489342 | 0.525052 | -0.06289 | -0.0734  | 0.869896 | 0.938938 |
| O75832 | 26S proteasome PSMD10                     | 0.03592  | -0.34156 | -0.01568 | 0.286914 | 0.128008 | 0.021695 | 0.090429 | -0.0803  | -0.24058 | -0.2507  |
| O75843 | AP-1 complex AP1G2                        | -2.32793 | -2.08549 | -2.58189 | -2.64292 | -0.8055  | -1.12553 | -0.62385 | -0.95491 | -0.96277 | -0.89752 |
| O75844 | CAAX prenylation ZMPSTE24                 | -1.23661 | -1.44392 | -0.78319 | -1.27563 | -1.55552 | -0.56866 | -1.19704 | -0.74846 | -1.64268 | -1.74882 |
| O75874 | Isocitrate dehydrogenase IDH1 PICD        | -0.57289 | -0.48699 | -0.44491 | -0.52376 | -0.63413 | -0.25649 | -0.15333 | -0.1193  | -0.53629 | -0.62324 |
| O75880 | Protein SC (SCO1) SCOC                    | -0.76553 | -1.31221 | -1.32193 | -1.45317 | -1.57755 | -1.18641 | -1.19704 | -1.1193  | -1.3505  | -1.6763  |
| O75884 | Serine hydroxymethyltransferase RBBP9 BOC | 0.024045 | 0.158617 | -0.13478 | -0.11078 | -0.18206 | 0.074547 | -0.09516 | -0.32623 | 0.082462 | 0.351712 |
| O75909 | Cyclin-K CCNK CPR4                        | -0.42721 | -0.04757 | -0.998   | -1.61783 | -0.32379 | -0.33015 | -0.65574 | -0.24257 | -2.01397 | -2.39135 |
| O75915 | PRA1 family ARL6IP5 DE                    | -0.46855 | -0.75659 | 1.208399 | 0.816288 | 1.011112 | 0.862496 | 0.893872 | 0.461512 | 0.443052 | 0.642794 |
| O75934 | Pre-mRNA debranching BCAS2 DAM            | 0.385953 | 0.342063 | 0.584963 | 0.435281 | 0.570012 | 0.490881 | 0.601916 | 0.561879 | 0.773279 | 0.518551 |
| O75935 | Dynactin subunit DCTN3 DCT                | -0.49394 | -0.61252 | -0.57719 | -0.44461 | -0.40024 | -0.88452 | -0.36476 | -0.50155 | -0.36864 | -0.10555 |
| O75937 | DnaJ homolog DNAJC8 SP                    | 1.054199 | 0.960096 | 1.061376 | 1.068411 | 1.105487 | 1.056912 | 0.997813 | 1.04125  | 1.364664 | 1.182482 |
| O75940 | Survival of SMNDC1 SI                     | -0.43539 | -0.19153 | -0.10932 | -0.30633 | -0.1161  | -0.24349 | -0.50293 | -0.36995 | 0.073529 | 0.202019 |



|        |              |            |          |          |          |          |          |          |          |          |          |           |
|--------|--------------|------------|----------|----------|----------|----------|----------|----------|----------|----------|----------|-----------|
| O75947 | ATP syntha   | ATP5PD AT  | 0.432039 | 0.378534 | 0.123255 | 0.433481 | -0.15288 | 0.578216 | 0.242789 | 0.288435 | -0.32278 | -0.22761  |
| O75955 | Flotillin-1  | FLOT1      | -0.6002  | -0.44923 | -0.51994 | -0.49235 | -0.71727 | -0.48215 | -0.40484 | -0.64636 | -0.06263 | 0.139112  |
| O75956 | Cyclin-depe  | CDK2AP2 C  | -0.83705 | -0.89665 | -0.44723 | -0.05539 | 0.046194 | -0.22217 | -0.08428 | 0.079103 | -0.12168 | -0.03022  |
| O75964 | ATP syntha   | ATP5MG A   | 2.236636 | 1.704686 | 0.587837 | 0.998744 | -0.28166 | 1.370641 | 1.47767  | 0.895583 | -0.12259 | -0.28919  |
| O75995 | SAM and S    | SASH3 CXo  | -0.09862 | -0.04302 | 0.241466 | 0.103431 | 0.132769 | -0.33068 | -0.01579 | -0.06635 | 0.042659 | 0.418927  |
| O76003 | Glutaredox   | GLRX3 PICC | 0.818138 | 1.025834 | 0.675284 | 0.758093 | 0.439902 | 0.627381 | 0.661334 | 0.477139 | 0.68156  | 0.506383  |
| O76021 | Ribosomal    | RSL1D1 CA  | -0.21505 | -0.22675 | -0.25061 | -0.47917 | -0.45017 | -0.16788 | -0.73769 | -0.43039 | -0.51592 | -0.22768  |
| O76038 | Secretagog   | SCGN SECR  | 1.27761  | 1.271135 | 0.52661  | -0.32193 | 1.362983 | 0.880418 | -0.45305 | -0.58496 | 0.973833 | 0.665292  |
| O76071 | Probable c   | CIAO1 CIA1 | -0.88359 | -0.97679 | -1.2276  | -1.06413 | -0.9852  | -0.86329 | -0.96963 | -0.885   | -1.33852 | -1.40621  |
| O76094 | Signal reco  | SRP72      | -0.88572 | -0.86367 | 0.055702 | 0.196903 | 0.24266  | 0.059469 | 0.147079 | 0.211917 | -0.22073 | -2.72E-05 |
| O94763 | Unconvent    | URI1 C19or | -1.59208 | -0.95001 | -1.35271 | -1.18312 | -0.88653 | -1.33983 | -1.53604 | -1.20456 | -0.50437 | -0.87931  |
| O94766 | Galactosyl   | B3GAT3     | -2.45964 | -2.53209 | -1.85896 | -1.96285 | -3.79256 | -1.37197 | -2.64237 | -3.25892 | -1.93546 | -1.59384  |
| O94768 | Serine/thre  | STK17B DR  | -0.11313 | 0.036072 | -0.06601 | -0.22675 | 0.156704 | -0.02188 | 0.15994  | -0.05111 | 0.250276 | -0.14335  |
| O94776 | Metastasis   | MTA2 MTA   | -0.53373 | -0.51694 | -0.4074  | -0.36567 | -0.64121 | -0.3643  | -0.23718 | -0.51181 | -0.38892 | -0.25276  |
| O94804 | Serine/thre  | STK10 LOK  | 0.497016 | 0.445728 | 0.766844 | 0.471923 | 0.580991 | 0.52646  | 0.582891 | 0.652279 | 0.87241  | 0.872859  |
| O94817 | Ubiquitin-li | ATG12 APC  | 1.95224  | 2.050761 | 2.166455 | 1.945673 | 1.968043 | 2.130532 | 1.860449 | 2.086115 | 2.257326 | 2.35604   |
| O94819 | Kelch repe   | KBTBD11 C  | -2.57923 | -1.86278 | -2.42286 | -1.73697 | -1.10009 | -1.14708 | -2.23266 | -2.04596 | -1.00028 | -1.00592  |
| O94826 | Mitochond    | TOMM70 K   | 0.099536 | 0.27275  | 0.206089 | 0.225972 | 0.372969 | 0.23173  | 0.204745 | 0.019814 | 0.238467 | 0.239986  |
| O94842 | TOX high nr  | TOX4 C14o  | -3.37126 | -4.07195 | -2.72403 | -3.45317 | -3.2076  | -3.40054 | -3.3322  | -3.45372 | -3.5025  | -2.2402   |
| O94874 | E3 UFM1-p    | UFL1 KIAAC | -0.73495 | -0.53138 | -0.06378 | -0.15899 | -0.30529 | 0.203533 | -0.35819 | -0.26303 | -0.4892  | -0.30981  |
| O94880 | PHD finger   | PHF14 KIAA | -0.00866 | -0.10426 | -0.05311 | -0.25544 | 0.157198 | -0.23054 | -0.24473 | -0.07039 | -0.2687  | -0.62081  |
| O94886 | CSC1-like p  | TMEM63A    | -2.68536 | -2.15634 | -3.28345 | -4.38606 | -3.79256 | -3.65208 | -2.89162 | -3.88982 | -2.97199 | -3.44184  |
| O94888 | UBX domai    | UBXN7 KIAA | -3.72489 | -3.72403 | -4.07195 | -3.84549 | -3.69302 | -4.45943 | -3.81762 | -3.80735 | -3.04793 | -2.59384  |
| O94901 | SUN domai    | SUN1 KIAA  | 0.357848 | -0.0843  | -0.04354 | 0.043253 | -0.22487 | 0.100264 | 0.010196 | 0        | -0.16993 | -0.52218  |
| O94903 | Pyridoxal p  | PLPBP PRO  | -1.68536 | -1.05565 | -0.65486 | -1.0906  | -0.69302 | -1.18641 | -1.06274 | -0.55943 | -0.96277 | -0.65524  |
| O94905 | Erlin-2 (Enc | ERLIN2 C8c | -0.39552 | -0.56471 | -0.59725 | -0.47192 | -0.62263 | -0.72869 | -0.42286 | -0.55736 | -0.32274 | -0.53013  |
| O94906 | Pre-mRNA-    | PRPF6 C20  | -0.06193 | 0.094327 | -0.03991 | -0.17464 | -0.05477 | -0.16335 | -0.08836 | -0.34148 | -0.16588 | 0.008824  |
| O94913 | Pre-mRNA     | PCF11 KIAA | -0.60942 | -0.5427  | -0.18709 | -0.21613 | -0.48097 | -0.11958 | -0.04679 | -0.51785 | -0.00472 | 0.047877  |
| O94915 | Protein fur  | FRYL AF4P1 | -0.5583  | -0.30218 | -0.25169 | -0.5444  | -0.55349 | -0.28821 | -0.58358 | -0.76274 | -0.67737 | -0.71717  |
| O94919 | Endonucle    | ENDOD1 KI  | -1.406   | -1.57864 | -1.11163 | -1.23939 | -1.40027 | -1.75215 | -1.35225 | -1.34954 | -1.64088 | -1.38299  |
| O94925 | Glutaminas   | GLS GLS1 K | -0.55354 | -0.26997 | -0.89392 | -0.71327 | -0.87521 | -0.69374 | -0.70611 | -0.73035 | -0.9484  | -1.14544  |
| O94952 | F-box only   | FBXO21 FB  | -2.98793 | -3.88753 | -2.26459 | -3.03814 | NA       | NA       | -3.28157 | -2.72935 | -2.04793 | -2.30433  |
| O94966 | Ubiquitin c  | USP19 KIAA | 0.213707 | -0.21397 | -0.07195 | 0.006259 | -0.22487 | 0.090032 | -0.35819 | -0.06439 | -0.02377 | 0.309483  |

|        |                         |          |          |          |          |          |          |          |          |          |          |
|--------|-------------------------|----------|----------|----------|----------|----------|----------|----------|----------|----------|----------|
| O94973 | AP-2 comp AP2A2 ADT     | 0.730891 | 0.923946 | -1.83128 | -1.30708 | 0.800967 | 0.443446 | 0.489805 | 0.312739 | -1.25633 | -1.05789 |
| O94979 | Protein tra SEC31A KIA  | 0.477822 | 0.69984  | 0.183387 | 0.480596 | 0.365687 | 0.300687 | 0.407338 | 0.61106  | 0.297196 | 0.168209 |
| O94992 | Protein HEI HEXIM1 CL   | -0.411   | -0.45457 | -0.7112  | -0.82312 | -0.38074 | -0.5366  | -0.48134 | -0.6644  | -0.50919 | -0.41209 |
| O95071 | E3 ubiquitin UBR5 EDD   | 0.35311  | 0.600476 | 0.27919  | 0.453718 | 0.694708 | 0.525461 | 0.186878 | 0.402098 | 0.63743  | 0.368948 |
| O95081 | Arf-GAP do AGFG2 HRE    | -0.90613 | -1.35147 | -0.86605 | -0.37788 | -0.74193 | -0.9783  | -1.16227 | -1.1193  | -0.9445  | -0.6763  |
| O95104 | SR-related SCAF4 KIAA   | -0.57357 | -0.26929 | -0.24136 | -0.07731 | -0.22487 | -0.41504 | -0.15087 | -0.18938 | -0.09832 | 0.027044 |
| O95140 | Mitofusin-2 MFN2 CPR1   | 0.659771 | 0.513013 | 0.064808 | 0.283793 | 0.072512 | -0.06711 | 0.159657 | -0.36995 | -0.13327 | -0.12473 |
| O95155 | Ubiquitin c UBE4B HD1   | 0.543974 | 0.733061 | 0.960472 | 0.701404 | 0.84717  | 0.603064 | 0.290901 | 0.592576 | 0.565979 | 0.385981 |
| O95163 | Elongator c ELP1 IKAP I | -1.40046 | -1.11133 | -1.54715 | -1.60195 | -1.62218 | -1.1621  | -1.03418 | -1.15108 | -1.81179 | -1.48394 |
| O95168 | NADH dehy NDUFB4        | 0.866808 | 0.896256 | 0.116169 | 0.028795 | 0.149361 | 0.218811 | 0.371786 | -0.02415 | -0.26638 | 0.00301  |
| O95169 | NADH dehy NDUFB8        | 0.592994 | 0.437219 | -0.52302 | -0.56437 | -0.64067 | -0.70768 | -0.09108 | -0.27192 | -0.94682 | -0.78721 |
| O95182 | NADH dehy NDUFA7        | 0.853375 | 0.90741  | 1.170791 | 0.865316 | 1.225234 | 1.087463 | 1.208279 | 0.929611 | 1.628477 | 1.326258 |
| O95183 | Vesicle-ass VAMP5 HSI   | -0.666   | -0.68589 | -0.97679 | -0.32979 | -0.55552 | -0.43706 | -0.62385 | -0.42269 | -2.67745 | -2.41355 |
| O95202 | Mitochond LETM1         | 0.065184 | 0.288798 | -0.1475  | -0.13934 | -0.39455 | 0.029208 | 0.069507 | 0.164771 | -0.65493 | -0.37145 |
| O95218 | Zinc finger ZRANB2 ZIF  | -1.26453 | -0.85103 | -0.90623 | -1.3996  | -0.75317 | -1.06966 | -0.90856 | -0.79156 | -0.87854 | -0.73415 |
| O95219 | Sorting nex SNX4        | -1.01217 | -1.7112  | -1.20945 | -0.85681 | -0.54463 | -1.22422 | -1.23266 | -1.29078 | -1.18057 | -0.88112 |
| O95232 | Luc7-like pr LUC7L3 CRI | 0.419912 | 0.682378 | 0.580073 | 1.320489 | 0.857467 | 0.906891 | 0.769684 | 0.663902 | 0.700418 | 0.678635 |
| O95248 | Myotubula SBF1 MTM1     | -1.71866 | -1.63906 | -1.5541  | -1.59756 | -1.49139 | -1.61813 | -1.24478 | -1.61887 | -1.83073 | -1.60745 |
| O95249 | Golgi SNAP GOSR1 GS2    | 2        | 1.931121 | 2.256521 | 1.782044 | 1.813715 | 1.905433 | 1.910297 | 1.916022 | 1.943511 | 1.694299 |
| O95251 | Histone ac KAT7 HBO1    | -1.28011 | -0.72403 | -0.64874 | -1.02531 | -0.57755 | -0.71348 | -0.82667 | -0.46158 | -0.83954 | -0.40036 |
| O95260 | Arginyl-tRNA TE1        | 0.121991 | 0.256521 | 0.462972 | 0.171318 | 0.524208 | 0.676705 | 0.767339 | 0.985616 | 0.956931 | 0.968684 |
| O95292 | Vesicle-ass VAPB UNQ    | -1.41908 | -1.43335 | 0.141044 | -0.26053 | 0.022139 | 0.174774 | -0.04152 | -0.36257 | 0.312468 | 0.365517 |
| O95295 | SNARE-ass SNAPIN BL1    | -0.69125 | -0.89645 | -1.12199 | -1.0126  | -1.03575 | -1.27846 | -1.03597 | -1.00086 | -1.31487 | -1.18886 |
| O95298 | NADH dehy NDUFC2 HI     | 1.946491 | 1.844975 | 1.1318   | 1.118792 | 0.718852 | 1.311177 | 1.491528 | 1.367956 | 0.516349 | -0.00289 |
| O95299 | NADH dehy NDUFA10       | -0.13995 | 0.07944  | -0.15592 | -0.01563 | -0.04532 | -0.00411 | -0.08114 | -0.12553 | -0.09078 | -0.11083 |
| O95319 | CUGBP Ela CELF2 BRUI    | 1.2726   | 1.094327 | 1.346669 | 1.309328 | 1.022139 | 0.84739  | 1.2158   | 0.929611 | 1.308666 | 1.479408 |
| O95336 | 6-phospho PGLS          | 0.045357 | 0.530399 | 0.431025 | 0.335482 | 0.291765 | 0.402268 | 0.233181 | -0.14244 | 0.505743 | 0.781745 |
| O95347 | Structural r SMC2 CAPE  | 0.032437 | -0.07351 | 0.317646 | 0.407413 | 0.18085  | 0.125855 | -0.00414 | 0.024464 | 0.007411 | 0.152612 |
| O95363 | Phenylalan FARS2 FAR1   | 0.183066 | 0.456075 | 0.169592 | -0.15474 | 0.210655 | 0.028433 | -0.7456  | -0.51376 | -0.69614 | -0.68935 |
| O95365 | Zinc finger ZBTB7A FBI  | -1.88086 | -1.93147 | -0.84488 | -0.74746 | -0.77973 | -0.84472 | -1.12832 | -1.29078 | -0.96277 | -0.95641 |
| O95372 | Acyl-protei LYPLA2 AP1  | 0.940692 | 0.813302 | 0.771216 | 0.623009 | 1.03912  | 1.018109 | 0.943972 | 1.108819 | 1.163261 | 1.223664 |
| O95373 | Importin-7 IPO7 RANB    | 0.53981  | 0.680507 | 0.068531 | -0.10402 | 0.371631 | 0.313158 | 0.31166  | -0.04064 | -0.09248 | 0.155098 |
| O95379 | Tumor nec TNFAIP8       | 1.917609 | 1.881477 | 1.762003 | 1.486233 | 1.925415 | 1.800194 | 1.72321  | 1.774582 | 1.975051 | 1.794866 |

|        |                        |          |          |          |          |          |          |          |          |          |          |
|--------|------------------------|----------|----------|----------|----------|----------|----------|----------|----------|----------|----------|
| O95391 | Pre-mRNA- SLU7         | -1.42586 | -0.62685 | -0.34278 | 0.01292  | -0.7571  | -0.49591 | -0.36436 | -0.45705 | -0.40237 | -0.42932 |
| O95394 | Phosphoac PGM3 AGN     | -2.32696 | -1.99968 | -1.69252 | -0.75429 | -1.42004 | -1.25373 | -1.21838 | -0.62153 | -1.60778 | -0.9781  |
| O95396 | Adenylyltra MOCS3 UB   | -0.72489 | -0.6672  | -0.88033 | -1.2909  | -1.12418 | -0.90484 | -0.63176 | -1.0115  | -0.96277 | -0.64829 |
| O95400 | CD2 antige CD2BP2 KIA  | -1.02445 | -0.75002 | -0.70483 | -0.68562 | -0.9852  | -0.66935 | -0.94973 | -0.75811 | -0.55695 | -0.1738  |
| O95425 | Supervillin SVIL       | -1.31346 | -1.2167  | -1.11353 | -1.10402 | -0.83173 | -0.9783  | -1.41163 | -1.29078 | -1.06756 | -1.04495 |
| O95429 | BAG family BAG4 SODI   | -3.25096 | -1.87317 | -1.7632  | -1.69574 | -1.14048 | -1.37197 | -1.53964 | -1.46949 | -1.1913  | -1.37145 |
| O95433 | Activator o AHSA1 C14  | -1.1514  | -1.33171 | -0.85543 | -1.0126  | -0.99809 | -0.97847 | -1.17863 | -1.31245 | -1.18045 | -0.87692 |
| O95453 | Poly(A)-spe PARN DAN   | -0.43539 | -0.39696 | -0.06378 | -0.61667 | -1.24236 | -0.82523 | -0.53964 | -0.79737 | -0.49584 | -0.89752 |
| O95456 | Proteasom PSMG1 C2     | -0.35566 | -0.44923 | -1.28345 | -0.76867 | -0.79256 | -0.77761 | -0.59266 | -0.90046 | -0.85651 | -0.68339 |
| O95466 | Formin-like FMNL1 C17  | 0.226434 | 0.233023 | 0.591432 | 0.179379 | 0.253313 | 0.288926 | 0.296786 | 0.236836 | 0.101896 | 0.077511 |
| O95470 | Sphingosin SGPL1 KIAA  | -1.12234 | -1.58596 | -1.69517 | -1.9386  | -1.05156 | -2.06548 | -2.26211 | -1.83472 | -1.71316 | -1.12232 |
| O95479 | GDH/6PGL H6PD GDH      | 0.018072 | -0.12199 | -0.25526 | 0.231326 | -0.44004 | -0.51301 | -0.4885  | -0.39232 | -0.3505  | -0.45391 |
| O95486 | Protein tra SEC24A     | -3.19438 | -1.93147 | -1.33171 | -2.06413 | -1.84503 | -1.85457 | -2.11718 | -2.848   | -2.02857 | -1.85688 |
| O95487 | Protein tra SEC24B     | 0.661789 | 0.59786  | 0.905416 | 0.87323  | 0.71507  | 0.761073 | 0.678036 | 0.567897 | 0.468602 | 0.530442 |
| O95551 | Tyrosyl-DN TDP2 EAP2   | 0.51154  | 0.620266 | 0.231295 | 0.381097 | 0.425989 | 0.61516  | 0.570782 | 0.555975 | 0.612338 | 0.171358 |
| O95571 | Persulfide ( ETHE1 HSC | 0.716207 | 0.279437 | 0.302694 | 0.431864 | 0.18085  | 0.778973 | 0.431751 | 0.355555 | 0.35135  | 0.230695 |
| O95573 | Long-chain ACSL3 ACS   | -0.09392 | 0.151613 | 0.116077 | 0.171318 | 0.029444 | 0.048363 | -0.01027 | -0.08246 | -0.25176 | -0.52218 |
| O95602 | DNA-direct POLR1A      | -0.57289 | -0.64874 | -0.83094 | -0.54171 | 0.086588 | -0.05571 | -0.7997  | -0.79737 | -0.71823 | -0.76377 |
| O95613 | Pericentrin PCNT KIAA  | -0.94779 | -0.82138 | -0.46517 | -0.75816 | -0.6674  | -0.56754 | -1.15603 | -1.12592 | -0.72237 | -0.76066 |
| O95625 | Zinc finger ZBTB11     | -1.47766 | -1.76435 | -1.67745 | -1.29227 | -1.08177 | -1.04918 | -1.16329 | -1.36457 | -1.61226 | -1.51787 |
| O95630 | STAM-bind STAMBIP AF   | -0.10692 | -0.16506 | 0.354315 | 0.278631 | 0.154975 | 0.043069 | 0.141219 | 0.280108 | 0.023383 | 0.276981 |
| O95639 | Cleavage ai CPSF4 CPSF | -0.19438 | 0.101614 | 0.087004 | 0.231326 | 0.043943 | -0.05571 | -0.06274 | -0.4459  | -0.24616 | -0.41799 |
| O95644 | Nuclear fac NFATC1 NF  | 0.523035 | 0.479846 | 0.416986 | 0.278631 | 0.154975 | 0.115477 | -0.12274 | -0.10692 | 0.360998 | 0.984427 |
| O95671 | Probable b ASMTL       | -0.41194 | -0.35299 | 0.085503 | 0.185828 | 0.05706  | -0.08912 | -0.45124 | -0.19934 | -0.1318  | -0.27834 |
| O95674 | Phosphatid CDS2        | 0.095442 | 0.214122 | -0.13457 | 0.208037 | -0.4724  | -0.35374 | -0.19604 | -0.60368 | -0.95286 | -0.65217 |
| O95684 | Centrosom CEP43 FGFI   | -1.31268 | -1.50399 | -1.04194 | -1.35186 | -0.83422 | -1.95693 | -0.99451 | -0.95803 | -1.27838 | -1.38013 |
| O95696 | Bromodom BRD1 BRL E    | 0.338802 | 0.304669 | 0.291986 | 0.288936 | 0.449936 | 0.299902 | 0.060121 | 0.217477 | -0.04793 | -0.06796 |
| O95721 | Synaptosor SNAP29      | -0.46021 | -0.2853  | -0.16923 | 0.000654 | -0.36312 | -0.62617 | -0.23855 | -0.49751 | -0.5229  | -0.4819  |
| O95747 | Serine/thre OXSR1 KIAA | 1.052331 | 1.302535 | 0.123066 | 0.298738 | 0.156088 | 0.49016  | 0.523206 | 0.240067 | 0.064752 | -0.25603 |
| O95749 | Geranylger GGPS1       | -3.43539 | -3.24598 | -3.88753 | -3.59756 | -3.27798 | -3.87447 | -4.05209 | -3.80735 | -3.86507 | -3.21945 |
| O95758 | Polypyrimin PTBP3 ROC  | 0.46062  | 0.407158 | 0.496073 | 0.226585 | 0.013054 | 0.230075 | 0.434382 | 0.166135 | 0.07075  | 0.100658 |
| O95777 | U6 snRNA-i LSM8        | -1.52852 | -1.63677 | -2.02359 | -1.8011  | -2.89947 | -2.2115  | -2.13955 | -1.34792 | -1.82086 | -2.26738 |
| O95782 | AP-2 comp AP2A1 ADT    | 0.776875 | 0.792095 | 0.329222 | 0.225663 | 0.300528 | 0.517416 | 0.729389 | 0.588839 | 0.468741 | 0.455722 |

|        |                         |          |          |          |          |          |          |          |          |          |          |
|--------|-------------------------|----------|----------|----------|----------|----------|----------|----------|----------|----------|----------|
| O95785 | Protein Wi: WIZ ZNF80   | -0.54609 | -0.60657 | 0.196539 | 0.15451  | 0.708426 | 0.282035 | 0.209177 | 0.094182 | 0.640458 | 0.87044  |
| O95786 | Antiviral in: DDX58     | -1.40028 | -1.63612 | -1.08348 | -1.1805  | -1.67092 | -1.48518 | -0.93203 | -1.35095 | -1.19349 | -1.30201 |
| O95793 | Double-str: STAU1 STA   | -0.72489 | -0.82402 | -0.44923 | -0.5787  | -0.39046 | -0.61813 | -0.5175  | -0.27684 | -0.50919 | -0.56083 |
| O95816 | BAG family BAG2         | -0.77748 | -0.97311 | -0.67963 | -0.5737  | -0.54893 | -0.27947 | -0.61635 | -0.82682 | -0.18057 | -0.44039 |
| O95817 | BAG family BAG3 BIS     | -1.62803 | -1.00782 | -0.92405 | -1       | -0.69613 | -0.85531 | -1.06835 | -1.16454 | -0.25302 | 0.039128 |
| O95819 | Mitogen-ac: MAP4K4 H    | -1.23661 | -1.78991 | -1.53138 | -1.8011  | -2.34899 | -2.50599 | -3.28243 | -2.78327 | -2.55802 | -2.6257  |
| O95825 | Quinone o: CRYZL1 4P1   | -0.11498 | -0.10333 | -0.16697 | -0.02956 | 0.183456 | -0.10088 | -0.1673  | -0.05004 | -0.11001 | 0.04015  |
| O95831 | Apoptosis-i: AIFM1 AIF  | 0.035907 | -0.23972 | 0.189165 | 0.138219 | 0.215154 | 0.223908 | 0.178144 | 0.063004 | 0.162982 | -0.25234 |
| O95833 | Chloride in: CLIC3      | -0.06193 | 0.451612 | 0.169058 | -0.11757 | -0.5231  | -0.15565 | 0.108376 | 0.120752 | -0.7028  | -0.50952 |
| O95834 | Echinoderm EML2 EMA     | 0.203214 | 0.158617 | -0.12199 | -0.05107 | -0.48097 | -0.1315  | -0.49942 | -0.3374  | -0.3445  | -0.07727 |
| O95861 | 3'(2'),5'-bis BPNT1     | 0.877053 | 1.413768 | 1.287694 | 1.219232 | 1.518255 | 1.417415 | 1.2538   | 1.302364 | 1.616807 | 1.623718 |
| O95865 | N(G),N(G)-: DDAH2 DD    | -2.02051 | -1.71403 | -1.87728 | -1.8855  | -2.81879 | -2.0887  | -1.6777  | -2.59567 | -2.44408 | -2.21915 |
| O95870 | Phosphatid: ABHD16A E   | -1.06193 | -0.60657 | -1.1305  | -1.56009 | -1.27798 | -1.1989  | -1.06274 | -1.10692 | -1.36257 | -0.85688 |
| O95881 | Thioredoxin: TXNDC12 T  | 0.612045 | 0.415074 | 1.000741 | 0.854841 | 0.586316 | 0.609958 | 0.667595 | 0.812212 | 0.206137 | 0.50614  |
| O95926 | Pre-mRNA-: SYF2 CBPIN   | -0.28011 | -0.42286 | 0.144576 | -0.41086 | 0.072512 | 0.217701 | -0.12832 | -0.13179 | 0.046393 | -0.01781 |
| O95989 | Diphospho: NUDT3 DIP    | -0.36409 | -0.1261  | -1.01879 | -0.74244 | -0.79798 | -0.29231 | -0.50601 | -0.73292 | -0.83071 | -0.73113 |
| O95999 | B-cell lymp: BCL10 CIPE | -0.88398 | -0.04219 | 0.149548 | 0.140708 | 0.222579 | 0.233028 | -0.30069 | 0.132862 | 0.217981 | 0.257871 |
| O96000 | NADH dehy: NDUFB10      | 1.523035 | 1.510278 | 0.424236 | 0.453718 | 0.248231 | 1.771066 | 1.178232 | 1.043713 | -0.05678 | -0.25649 |
| O96006 | E3 SUMO-: ZBED1 ALTI    | -1.15335 | -1.25526 | -0.68589 | -0.18015 | -0.71727 | -0.81558 | -0.53222 | -1.03477 | -1.02857 | -0.78649 |
| O96019 | Actin-like: pACTL6A BA  | -0.34152 | -0.14747 | 0.235032 | 0.37389  | -0.17177 | -0.5064  | -0.09987 | -0.40663 | -0.46826 | -0.20839 |
| P00338 | L-lactate de: LDHA PIG1 | 1.024045 | 0.970981 | 0.998049 | 0.861869 | 0.662182 | 0.844349 | 1.025356 | 0.896164 | 0.934905 | 1.147127 |
| P00367 | Glutamate: GLUD1 GLU    | 0.723568 | 0.859523 | 0.725958 | 0.885829 | 0.636052 | 0.883384 | 1.082537 | 1.088809 | 0.597481 | 0.412823 |
| P00387 | NADH-cyto: CYB5R3 DI    | -0.28749 | -0.11775 | 0.744349 | 0.411898 | 0.270452 | 0.723099 | 0.387926 | 0.629865 | 0.145717 | -0.28803 |
| P00390 | Glutathion: GSR GLUR    | 0.560509 | 0.808469 | 0.565049 | 0.803465 | 0.796692 | 0.841473 | 0.78229  | 0.893085 | 0.538005 | 0.376811 |
| P00395 | Cytochrom: MT-CO1 CC    | -2.98793 | -2.34156 | -2.5541  | -1.3377  | -2.35199 | -1.91511 | -3.05209 | -1.14439 | -3.16993 | -1.8893  |
| P00403 | Cytochrom: MT-CO2 CC    | 3.017942 | 2.771871 | 0.843825 | 1.18897  | 0.545655 | 1.231205 | 1.962003 | 1.33926  | 0.206165 | -0.06164 |
| P00451 | Coagulatio: F8 F8C      | -0.666   | -0.82402 | -0.62449 | -0.89129 | -1.10806 | -0.84472 | -0.94973 | -0.49346 | -0.61353 | -0.44786 |
| P00491 | Purine nucl: PNP NP     | 0.079116 | 0.533398 | -0.1939  | 0.370027 | -0.10584 | 0.700773 | 0.270639 | -0.05737 | -0.66797 | -0.66557 |
| P00492 | Hypoxanth: HPRT1 HPR    | 1.211091 | 1.167323 | 0.984318 | 1.193539 | 0.971103 | 0.782154 | 1.235488 | 1.220313 | 1.007055 | 1.305711 |
| P00505 | Aspartate : GOT2        | 0.637069 | 0.535681 | 0.585028 | 1.241144 | 0.243337 | 0.481492 | 0.975858 | 0.552054 | 0.667461 | 0.598823 |
| P00558 | Phosphogly: PGK1 PGKA   | 0.734539 | 0.765272 | 0.900945 | 0.666263 | 0.988802 | 0.895185 | 0.743092 | 0.850304 | 1.227762 | 1.230272 |
| P00747 | Plasminoge: PLG         | -2.89411 | -2.05702 | -0.47321 | -0.84708 | -1.66821 | -1.16103 | -0.98148 | -1.24949 | -1.24898 | -1.16762 |
| P00813 | Adenosine: ADA ADA1     | 0.144101 | 0.437285 | -0.27872 | -0.30633 | -1.04532 | -0.66935 | -0.39808 | -0.33342 | 0.390071 | -0.50324 |

|        |                         |          |          |          |          |          |          |          |          |          |          |
|--------|-------------------------|----------|----------|----------|----------|----------|----------|----------|----------|----------|----------|
| P01009 | Alpha-1-an SERPINA1 /   | -0.47697 | -0.09259 | -0.23676 | -0.23816 | -0.85845 | -0.74977 | -0.15087 | -0.13179 | -1.20211 | -1.71937 |
| P01111 | GTPase NR NRAS HRAS     | 0.13317  | 0.273266 | 0.036454 | 0.101609 | 0.10839  | 0.275793 | 0.070791 | 0.046281 | -0.08302 | -0.0854  |
| P01116 | GTPase KR: KRAS KRAS    | 0.448371 | 0.816331 | 0.679421 | 0.55429  | 0.466186 | 0.769344 | 0.818388 | 0.809662 | 0.253742 | 0.337755 |
| P01591 | Immunoglc JCHAIN IGC    | -0.55497 | -0.40726 | -1.75002 | -1.86821 | -2.74193 | -1.44448 | -3.18536 | -2.04654 | -1.10764 | -1.47836 |
| P01730 | T-cell surfa CD4        | 0.186152 | 0.435568 | 0.026156 | 0.024374 | 0.047433 | 0.154268 | 0.215825 | -0.08267 | 0.398983 | 0.207553 |
| P01732 | T-cell surfa CD8A MAL   | 1.735046 | 1.874191 | 1.311397 | 1.594191 | 1.001847 | 1.298218 | 2.173299 | 1.949043 | 0.753482 | 0.656632 |
| P01834 | Immunoglc IGKC          | 0.149083 | 0.166755 | -1.09659 | -1.08544 | -0.73783 | -0.7964  | -1.17737 | -0.94839 | -1.0531  | -1.40028 |
| P01848 | T cell receç TRAC TCRA  | 1.766495 | 1.965945 | 1.007355 | 1.202394 | 1.400291 | 1.097562 | 1.442627 | 1.39063  | 1.675598 | 1.657445 |
| P01857 | Immunoglc IGHG1         | -1.24772 | -0.8422  | -1.05009 | -1.83778 | -2.09851 | -1.73337 | -0.93505 | -0.71758 | -0.47179 | -0.71623 |
| P01876 | Immunoglc IGHA1         | -0.51111 | -0.90933 | -2.26459 | -1.71621 | -2.59991 | -2.0902  | -2.89162 | -3.45372 | -2.04793 | -1.69052 |
| P01892 | HLA class I HLA-A HLA   | -2.15949 | -2.27773 | -1.57864 | -1.21151 | -2.0957  | -2.2571  | 0.113641 | 0.399407 | -1.78668 | -1.75645 |
| P02545 | Prelamin-A LMNA LMN     | 0.578585 | 0.528991 | 0.608571 | 0.818658 | 0.336725 | 0.342811 | 0.792602 | 0.712848 | -0.40601 | -0.23868 |
| P02656 | Apolipopro APOC3        | 0.561434 | 0.611988 | 1.554573 | 1.527016 | 1.328993 | 1.417355 | 0.902019 | 1.210342 | 1.500234 | 1.443063 |
| P02671 | Fibrinogen FGA          | -1.80735 | -2.48699 | -2.50901 | -1.9386  | -2.64572 | -1.91511 | -1.782   | -1.74846 | -2.08746 | -1.63448 |
| P02675 | Fibrinogen FGB          | -0.63531 | -0.58012 | -0.80149 | -0.98291 | -0.63445 | -0.45974 | -0.93036 | -0.49491 | -0.89109 | -0.87575 |
| P02679 | Fibrinogen FGG PRO2C    | 0.925361 | 0.338983 | 0.019365 | -0.37788 | 0.18799  | 1.383966 | 1.393778 | 1.104869 | -1.57089 | -1.60726 |
| P02686 | Myelin bas MBP          | -1.26546 | -0.91667 | -1.32127 | -0.97534 | -1.88469 | -1.24595 | -1.36268 | -1.25866 | -1.37082 | -0.7121  |
| P02749 | Beta-2-glyc APOH B2G:   | 0.80215  | 0.749389 | 1.52661  | 1.691728 | 1.339666 | 1.227069 | 1.340229 | 1.149425 | 0.609891 | 0.178749 |
| P02751 | Fibronectin FN1 FN      | -0.98793 | -1.37151 | -1.42627 | -1.22671 | -0.91341 | -0.56058 | -0.35165 | -0.69188 | -0.98126 | -0.96502 |
| P02771 | Alpha-feto AFP HPAFP    | -1.03684 | -1.66102 | -0.86605 | -1.30633 | -0.83173 | -0.74977 | -0.75585 | -0.61096 | -0.98126 | -0.97369 |
| P02774 | Vitamin D-IGC           | -1.04818 | -1.34169 | -0.86071 | -1.51594 | -1.49215 | -0.95231 | -0.87618 | -1.6933  | -1.74603 | -1.32858 |
| P02775 | Platelet ba: PPBP CTAP  | -0.07707 | -0.16837 | 0.355269 | 0.383529 | 0.424394 | 0.188835 | 0.642482 | 0.676227 | 0.834372 | 0.829571 |
| P02794 | Ferritin heç FTH1 FTH F | -0.53859 | -0.10033 | -0.18691 | 0.110443 | -0.29089 | -0.51055 | -0.45757 | -0.13114 | -0.75471 | -0.08273 |
| P03928 | ATP syntha MT-ATP8 A    | 1.912537 | 1.87376  | 1.756331 | 1.695607 | 1.441746 | 1.631563 | 1.680628 | 1.655715 | 1.025701 | 1.196236 |
| P03989 | HLA class I HLA-B HLAI  | -0.69792 | -0.6636  | -0.53837 | 0.068454 | -1.55552 | -1.45943 | -3.09516 | -3.16993 | -1.76553 | -1.99118 |
| P04075 | Fructose-bi ALDOA ALL   | 0.260155 | 0.517886 | 0.599813 | 0.220234 | 0.603034 | 0.456551 | 0.514725 | 0.502478 | 0.743979 | 0.668357 |
| P04080 | Cystatin-B   CSTB CST6  | 0.000263 | 0.179362 | -0.04895 | 0.046271 | -0.09614 | 0.153746 | 0.221911 | 0.167903 | 0.378285 | 0.443049 |
| P04083 | Annexin A1 ANXA1 AN)    | 0.836521 | 1.089004 | 1.359039 | 1.16055  | 0.599822 | 0.847093 | 0.491355 | 0.846031 | 0.401879 | 0.128588 |
| P04150 | Glucocortic NR3C1 GRL   | -0.56616 | -0.61357 | -0.72702 | -0.67313 | -1.30884 | -0.86424 | -0.61276 | -1.45645 | -1.72149 | -0.97931 |
| P04156 | Major prior PRNP ALTP   | -3.13993 | -3.53138 | -2.12199 | -2.75803 | -4.27798 | -2.83494 | -3.13955 | -3.97728 | -3.21299 | -1.87299 |
| P04179 | Superoxide SOD2         | -1.36144 | -0.36216 | -2.73702 | -2.5798  | -2.44234 | -1.50757 | -1.30866 | -1.37515 | -1.37412 | -1.50822 |
| P04181 | Ornithine a OAT         | -0.30236 | -0.23217 | -0.65486 | -1.40255 | -0.59991 | -1.14958 | -0.68012 | -0.922   | -0.83954 | -0.61402 |
| P04234 | T-cell surfa CD3D T3D   | 0.088176 | 0.216811 | -1.32166 | -1.3116  | -0.49139 | -0.90484 | -0.63971 | -0.66434 | -0.24058 | -0.79414 |

|        |                         |          |          |          |          |          |          |          |          |          |          |
|--------|-------------------------|----------|----------|----------|----------|----------|----------|----------|----------|----------|----------|
| P04350 | Tubulin bet TUBB4A TL   | 0.090392 | 0.103584 | 1.533885 | 1.259953 | 1.357467 | 1.801476 | 1.564813 | 1.944883 | 1.49565  | 1.175646 |
| P04406 | Glyceraldel GAPDH GA    | 0.25853  | 0.564776 | 0.727676 | 0.626803 | 0.958134 | 0.785579 | 0.760979 | 0.691605 | 1.00347  | 1.038424 |
| P04424 | Argininosu ASL          | -3.19438 | -1.48699 | -2.44392 | -2.8011  | -2.51245 | -2.75899 | -2.13955 | -1.61973 | -2.02857 | -1.79414 |
| P04439 | HLA class I HLA-A HLA   | 0.846649 | 0.52661  | -1.37112 | -1.18884 | -4.59991 | -3.72247 | -3.81314 | -4.17008 | -0.06365 | -0.15998 |
| P04632 | Calpain sm CAPNS1 CA    | 0.33579  | 0.405256 | 0.067552 | 0.023166 | -0.13226 | 0.074168 | 0.049337 | 0.060481 | -0.23047 | -0.35221 |
| P04733 | Metallothio MT1F PRO    | -3.98793 | -4.13906 | NA       | NA       | -2.74193 | -3.52083 | NA       | NA       | -2.89984 | -3.39453 |
| P04792 | Heat shock HSPB1 HSP    | -0.32496 | 0.030861 | 1.409666 | 1.263034 | 1.388772 | 1.546193 | 0.336182 | 0.440573 | 0.902483 | 0.728087 |
| P04839 | Cytochrom CYBB NOX2     | -0.04307 | -0.02359 | -0.52576 | -0.66558 | -0.06075 | -0.37906 | 0.060121 | 0.415037 | -0.38087 | -0.12956 |
| P04843 | Dolichyl-di RPN1        | -0.16369 | -0.28113 | 0.24753  | -0.14998 | 0.023457 | 0.210076 | -0.15091 | 0.056143 | -0.46447 | -0.42414 |
| P04844 | Dolichyl-di RPN2        | 0.628744 | 0.80624  | -0.20945 | 0.160134 | -0.39046 | 0        | 0.098853 | -0.42269 | -0.91754 | -0.06796 |
| P04899 | Guanine n GNAI2 GNA     | 0.006049 | 0.072245 | -0.15906 | -0.05107 | -0.42999 | -0.1375  | -0.35712 | -0.05247 | -0.2916  | -0.38294 |
| P04921 | Glycophori GYPC GLPC    | -0.88359 | -1.24598 | -3.83094 | -3.20163 | -3.2076  | -3.34395 | -2.03103 | -3.07039 | -3.30319 | -3.0268  |
| P05023 | Sodium/po ATP1A1        | 0.336128 | 0.068531 | -0.24589 | -0.17986 | -0.39097 | -0.11892 | -0.01518 | -0.04359 | -0.2687  | -0.63448 |
| P05091 | Aldehyde d ALDH2 ALD    | 1.110807 | 1.256521 | 1.032768 | 1.193429 | 0.638492 | 0.471306 | 0.752232 | 0.777608 | 0.218346 | 0.166972 |
| P05106 | Integrin be ITGB3 GP3   | 0.093116 | 0.13186  | 0.325626 | 0.032944 | -0.26819 | -0.1575  | 0.478582 | 0.00471  | -0.97998 | -0.84983 |
| P05107 | Integrin be ITGB2 CD1   | 0.399803 | 0.317241 | 0.23349  | 0.006259 | -0.1161  | 0.174774 | 0.069902 | 0.172467 | -0.25739 | -0.23499 |
| P05112 | Interleukin IL4         | -3.37126 | -2.44392 | -1.91667 | -1.59756 | -3.2076  | -2.95693 | -3.81762 | -3.16993 | -2.14886 | -2.41799 |
| P05114 | Non-histon HMGN1 HM     | 0.796899 | 0.878009 | 0.776348 | 0.525197 | 0.865821 | 0.72379  | 0.738746 | 0.688056 | 0.843274 | 0.704829 |
| P05141 | ADP/ATP tr SLC25A5 AI   | 1.462112 | 1.483495 | 0.285173 | 0.044639 | -0.20845 | 0.249696 | 0.715318 | 0.201101 | -0.68803 | -0.85321 |
| P05161 | Ubiquitin-li ISG15 G1P2 | -0.63195 | -0.4269  | -0.40329 | -0.14733 | -1.16586 | -0.94957 | -0.43808 | -0.66259 | 0.065175 | 0.07668  |
| P05165 | Propionyl-( PCCA        | -0.00473 | -0.03019 | -0.00721 | -0.08518 | 0.269412 | -0.24998 | -0.05436 | -0.34066 | -0.09581 | 0.346726 |
| P05166 | Propionyl-( PCCB        | -0.17617 | 0.187381 | -0.62449 | -0.34573 | -0.44004 | 0.169115 | -0.04217 | 0.031603 | -0.19709 | -0.53495 |
| P05198 | Eukaryotic EIF2S1 EIF2  | 0.100367 | 0.409689 | -0.24638 | -0.33491 | -0.05622 | -0.30484 | -0.05765 | -0.07965 | -0.05666 | -0.19955 |
| P05204 | Non-histon HMGN2 HM     | 0.703295 | 0.911562 | 0.584002 | 1.000654 | 0.908437 | 0.60853  | 0.996891 | 0.815344 | 0.396306 | 0.607138 |
| P05362 | Intercellula ICAM1      | -1.1669  | -0.4761  | -1.51769 | -1.97623 | -2.42776 | -2.23383 | -2.03727 | -2.02009 | -2.91589 | -2.53931 |
| P05387 | 60S acidic r RPLP2 D11  | 0.916098 | 1.046981 | 0.289052 | 0.523145 | 0.468242 | 0.508357 | 0.634514 | 0.500524 | 0.463744 | 0.502737 |
| P05388 | 60S acidic r RPLP0      | 1.016199 | 0.978917 | 0.88013  | 0.805562 | 0.84717  | 0.520036 | 0.93459  | 0.740396 | 1.071287 | 1.269657 |
| P05412 | Transcriptio JUN        | -2.48633 | -1.75553 | -1.81727 | -2.40112 | -2.08183 | -1.19304 | -1.23236 | -1.23261 | -1.88245 | -1.30632 |
| P05455 | Lupus La pr SSB         | 0.48333  | 0.60817  | 0.490986 | 0.374945 | 0.299108 | 0.486987 | 0.290901 | 0.490326 | 0.649503 | 0.384884 |
| P05534 | HLA class I HLA-A HLA   | -1.20832 | -0.51457 | 0.105243 | -0.30633 | -3.2076  | -1.28951 | -1.89162 | -1.63743 | -3.04793 | -1.74882 |
| P05556 | Integrin be ITGB1 FNRI  | -0.818   | -0.92331 | -0.43862 | -0.74746 | -0.8055  | -0.85457 | -1.2012  | -1.24808 | -0.97199 | -1.42986 |
| P05771 | Protein kin PRKCB PKC   | 1.179048 | 1.314109 | 1.153078 | 0.99872  | 0.871762 | 0.924273 | 1.117836 | 0.982722 | 0.745427 | 0.880091 |
| P06127 | T-cell surfa CD5 LEU1   | -0.61869 | -0.88753 | -0.04131 | -0.51644 | -0.17365 | -0.23704 | -0.39808 | -0.59358 | -0.14294 | -0.18886 |

|        |                         |          |          |          |          |          |          |          |          |          |          |
|--------|-------------------------|----------|----------|----------|----------|----------|----------|----------|----------|----------|----------|
| P06239 | Tyrosine-pr LCK         | 0.003108 | -0.07986 | -0.2748  | -0.17456 | 0.021507 | 0.084261 | 0.013843 | -0.18638 | -0.35078 | -0.29492 |
| P06241 | Tyrosine-pr FYN         | -1.04933 | -0.92405 | -0.55984 | -0.56937 | -1.37109 | -1.1989  | -0.93988 | -1.29078 | -1.38702 | -1.56737 |
| P06400 | Retinoblast RB1         | -2.0646  | -1.4018  | -1.46726 | -1.80708 | -1.85349 | -1.13391 | -2.09317 | -2.34859 | -2.46514 | -1.8489  |
| P06454 | Prothymos PTMA TMS      | -0.02577 | -0.10512 | 0.040043 | 0.312236 | 0.161638 | -0.28284 | 0.108376 | -0.07039 | -0.05282 | 0.201871 |
| P06576 | ATP syntha ATP5F1B A    | 0.22955  | 0.253294 | 0.464667 | 0.255193 | 0.229392 | 0.370571 | 0.410589 | 0.459977 | 0.608072 | 0.625341 |
| P06702 | Protein S1C S100A9 CA   | 2.833103 | 2.997073 | -1.1305  | -1.47045 | -1.71727 | -0.89465 | 0.164229 | 0.141661 | -1.3505  | -1.09134 |
| P06703 | Protein S1C S100A6 CA   | 2.620731 | 2.74618  | 0.321919 | 0.857862 | 0.834142 | 1.330284 | 1.216673 | 1.008483 | 0.36108  | 0.503554 |
| P06729 | T-cell surfa CD2 SRBC   | 1.118352 | 1.222909 | 1.213452 | 1.27117  | 1.232408 | 1.145291 | 0.994146 | 0.855256 | 0.868843 | 0.775456 |
| P06730 | Eukaryotic EIF4E EIF4E  | -0.38962 | 0.044048 | 1.461557 | 1.363963 | -0.52124 | -0.56503 | -0.10491 | -0.24889 | -0.19851 | -0.17525 |
| P06733 | Alpha-enol ENO1 ENO1    | 0.233236 | 0.493758 | 0.548756 | 0.426985 | 0.547819 | 0.631352 | 0.54909  | 0.657439 | 1.002355 | 0.901345 |
| P06744 | Glucose-6-PI GPI        | 0.906082 | 1.000924 | 0.337974 | 0.49436  | 0.557379 | 0.906891 | 0.765355 | 0.778122 | 0.636706 | 0.461843 |
| P06746 | DNA polym POLB          | -0.83954 | -0.63656 | -0.65486 | -0.97513 | -1.14048 | -0.28951 | -0.7217  | -0.42269 | -0.4892  | -0.7414  |
| P06748 | Nucleopho NPM1 NPM1     | -0.57334 | -0.45201 | 0.313618 | 0.333921 | 0.488914 | 0.375011 | 0.372423 | 0.549227 | 0.563599 | 0.514408 |
| P06753 | Tropomyos TPM3          | 0.565698 | 0.549384 | 0.765535 | 0.483413 | 0.528919 | 0.490102 | 0.499986 | 0.42696  | 0.665725 | 0.751817 |
| P06865 | Beta-hexos HEXA         | 0.566416 | 0.726838 | -1.08865 | -0.96357 | -0.54725 | -1.00599 | -0.48995 | -0.85995 | -1.26625 | -0.39486 |
| P07108 | Acyl-CoA-b DBI          | 1.84632  | 2.278822 | 0.659627 | 1.263531 | 0.026789 | 0.478187 | 1.042943 | 1.08292  | 0.160409 | -0.04945 |
| P07195 | L-lactate de LDHB       | 1.335198 | 1.046047 | 1.287201 | 1.151292 | 1.445505 | 1.333993 | 1.328868 | 1.16383  | 1.762203 | 1.81869  |
| P07196 | Neurofilam NEFL NF68    | -1.15335 | -1.19153 | -0.83789 | -1.52356 | 0.927564 | 0.447459 | -1.45305 | -1.97728 | -0.75754 | -0.68339 |
| P07199 | Major cent CENPB        | -0.12003 | -0.20945 | -0.94642 | -0.9386  | -0.33313 | -0.41504 | -0.54709 | -0.69188 | -1.13845 | -0.12956 |
| P07203 | Glutathione GPX1        | 0.445032 | 0.557795 | -0.38163 | 0.055377 | 0.377367 | 0.529253 | 0.248466 | 0.321928 | 0.407948 | 0.122947 |
| P07237 | Protein dis P4HB ERBA   | 0.259557 | 0.539087 | 0.889091 | 1.130291 | 0.593625 | 0.688526 | 0.631298 | 0.630141 | 0.243201 | 0.286073 |
| P07305 | Histone H1 H1-O H1FO    | 0.460269 | 1.044158 | 0.116077 | -0.04459 | 1.273531 | 1.19162  | 1.824422 | 1.799153 | 1.462001 | 1.726751 |
| P07355 | Annexin A2 ANXA2 ANX    | 0.36963  | 0.479846 | 0.842384 | 0.842802 | 0.572755 | 0.330645 | 0.546949 | 0.473931 | -0.61353 | -0.56083 |
| P07384 | Calpain-1 c CAPN1 CAP   | 0.490082 | 0.457495 | 0.084517 | 0.420203 | 0.13846  | 0.591964 | 0.394422 | 0.402887 | 0.124795 | -0.14456 |
| P07437 | Tubulin bet TUBB TUBE   | -0.666   | -0.45992 | 0.425721 | 0.407175 | 0.31895  | 0.242193 | 0.380085 | 0.644772 | 0.43644  | 0.198166 |
| P07602 | Prosaposin PSAP GLBA    | 0.870054 | 0.847997 | 0.907018 | 0.840458 | 0.634487 | 0.807355 | 0.702799 | 0.749633 | 0.588239 | 0.512195 |
| P07686 | Beta-hexos HEXB HCC7    | -0.16011 | -0.18265 | 0.247739 | 0.425973 | 0.138001 | 0.079727 | 0.529334 | 0.519842 | 0.042477 | -0.11276 |
| P07737 | Profilin-1 (PFN1        | 0.441699 | 0.504792 | 0.685364 | 0.453362 | 0.22279  | 0.41913  | 0.273574 | 0.473908 | 0.604383 | 0.473763 |
| P07738 | Bisphospho BPGM         | -3.64689 | -3.57719 | -2.23143 | -2.14933 | -1.91593 | -1.24767 | -2.07346 | -2.07039 | -3.04793 | -2.11991 |
| P07741 | Adenine pr APRT         | 1.467851 | 1.788291 | 0.866236 | 1.33416  | 1.22936  | 1.59095  | 1.561697 | 1.38711  | 1.05042  | 0.694298 |
| P07766 | T-cell surfa CD3E T3E   | 0.070967 | 0.023207 | -0.23217 | -0.02531 | 0.221113 | 0        | -0.05209 | -0.16993 | -0.08246 | -0.00888 |
| P07814 | Bifunctional EPRS1 EPR1 | 0.115666 | -0.06786 | 0.285602 | 0.085211 | 0.133571 | 0.290996 | 0.212198 | 0.167378 | 0.429954 | 0.384226 |
| P07858 | Cathepsin L CTSB CPSB   | 0.041363 | 0.410629 | 0.446478 | 0.325382 | 0.813821 | 0.48189  | -0.10554 | -0.09319 | 0.353962 | 0.15887  |

|        |                        |          |          |          |          |          |          |          |          |          |          |
|--------|------------------------|----------|----------|----------|----------|----------|----------|----------|----------|----------|----------|
| P07900 | Heat shock HSP90AA1    | -0.22101 | -0.21919 | 0.498431 | 0.287442 | 0.550008 | 0.345783 | 0.601439 | 0.482801 | 0.578493 | 0.660049 |
| P07902 | Galactose-: GALT       | -0.25932 | -0.25516 | 0.398767 | 0.366013 | 0.288715 | 0.242699 | 0.074118 | -0.04122 | 0.088745 | 0.182211 |
| P07910 | Heterogeni HNRNPC HI   | 0.395201 | 0.46014  | 0.345135 | 0.079322 | 0.474107 | 0.430195 | 0.387926 | 0.256219 | 0.360998 | 0.228701 |
| P07919 | Cytochrom UQCRH        | -0.71204 | -1.12727 | -0.92219 | -1.13987 | -1.00015 | -0.852   | -0.2308  | -0.27147 | -1.19283 | -0.68006 |
| P07948 | Tyrosine-pi LYN JTK8   | 0.018072 | 0.09067  | -0.08844 | -0.15899 | 0.594844 | 0.053638 | 0.715317 | 0.028345 | -0.37474 | -0.40036 |
| P07951 | Tropomyos TPM2 TMS     | 0.095609 | -0.00314 | 0.405677 | -0.4598  | 0.289626 | 0.002521 | 0.141033 | 0.237881 | 0.014823 | 0.015803 |
| P07954 | Fumarate f FH          | -0.15412 | 0.378063 | -0.03106 | 0.137504 | -0.28703 | 0.130532 | -0.15656 | -0.07641 | 0.193823 | 0.251185 |
| P07996 | Thrombosç THBS1 TSP    | -0.68536 | -0.30738 | 0.675633 | 0.794755 | 0.822152 | 0.656046 | 1.02032  | 0.760812 | 0.379237 | 0.419456 |
| P08047 | Transcripti SP1 TSFP1  | -1.58014 | -1.47524 | -0.83234 | -1.0012  | -0.76836 | -0.5819  | -0.58811 | -0.48334 | -1.4119  | -0.71937 |
| P08069 | Insulin-like IGF1R     | -0.22239 | -0.16069 | 0.030861 | 0.363963 | 0.513829 | 0.41913  | 0.411195 | 0.5025   | 0.546743 | 0.406159 |
| P08133 | Annexin A6 ANXA6 AN    | 1.006049 | 1.009294 | 0.641044 | 0.943379 | 0.810463 | 0.686601 | 0.820032 | 0.685102 | 0.675135 | 0.714604 |
| P08134 | Rho-relate( RHOC ARH   | 1.348356 | 1.569281 | 1.733061 | 1.662305 | 1.673883 | 1.534922 | 1.821898 | 1.733527 | 1.014075 | 0.920399 |
| P08174 | Compleme CD55 CR D     | -1.26546 | -1.19153 | -2.15634 | -1.82312 | -1.29613 | -1.28951 | -1.20881 | -1.29078 | -1.59918 | -1.11991 |
| P08195 | 4F2 cell-sur SLC3A2 MC | -0.60942 | -0.28345 | -0.30738 | -0.32193 | -0.6574  | -0.18021 | -0.13393 | -0.48543 | -0.25739 | -0.62081 |
| P08238 | Heat shock HSP90AB1    | -0.08062 | -0.19329 | -0.1537  | -0.2011  | -0.03307 | -0.02715 | 0.142141 | 0.001683 | 0.08245  | 0.038895 |
| P08240 | Signal reco SRPRA SRP  | -0.90613 | -0.17276 | -0.33201 | -0.74715 | -0.34441 | -0.07922 | -0.98752 | -0.39412 | -1.19299 | -0.3868  |
| P08514 | Integrin alç ITGA2B GP | -1.02146 | -1.00131 | -0.89953 | -1.10807 | -1.85174 | -1.16362 | -0.68686 | -0.9701  | -1.72224 | -1.44894 |
| P08559 | Pyruvate d PDHA1 PHE   | 0.141922 | 0.307127 | -0.15634 | 0.091148 | 0.16378  | -0.07229 | 0.34396  | 0.003807 | 0.082007 | 0        |
| P08567 | Pleckstrin ( PLEK P47  | -0.89482 | -0.82402 | -0.73048 | -1.41923 | -2.79256 | -3.04439 | -1.51019 | -1.56789 | -3.3505  | -2.44184 |
| P08574 | Cytochrom CYC1         | 1.462734 | 1.46014  | 0.648528 | 0.743225 | -0.269   | 0.369234 | 0.937264 | 0.432111 | -0.18057 | -0.14906 |
| P08575 | Receptor-t PTPRC CD4   | 0.759818 | 0.87376  | 0.381508 | 0.339385 | 0.537185 | 0.488714 | 0.649974 | 0.393407 | 0.226428 | 0.190431 |
| P08579 | U2 small nt SNRPB2     | 0.193795 | 0.416465 | 0.336717 | 0.598644 | 0.268077 | 0.619926 | 0.285701 | 0.485474 | 0.686984 | 0.669254 |
| P08621 | U1 small nt SNRNP70 R  | 0.381177 | 0.624608 | 0.600079 | 0.36954  | 0.526401 | 0.49589  | 0.448409 | 0.484198 | 0.587935 | 0.860717 |
| P08648 | Integrin alç ITGA5 FNR | -0.47837 | -0.17418 | 0.335507 | 0.026349 | -0.13003 | -0.65302 | -0.18237 | -0.20069 | -0.49094 | -0.34543 |
| P08670 | Vimentin VIM           | 0.180056 | 0.2824   | 0.213452 | 0.319417 | -0.00481 | 0.015476 | -0.16227 | -0.0378  | 0.113033 | 0.134666 |
| P08708 | 40S ribosor RPS17 RPS  | -0.1669  | 0.445898 | 1.741248 | 0.563901 | 0.84717  | 0.360747 | 1.250618 | 0.056143 | 2.167828 | 2.157083 |
| P08754 | Guanine nt GNAI3       | -0.64689 | -0.52576 | -0.64874 | -0.72655 | -1.47063 | -1.12553 | -1.05209 | -1.39232 | -1.52947 | -1.21945 |
| P08865 | 40S ribosor RPSA LAME  | -0.02181 | 0.070699 | -0.0986  | 0.008159 | 0.040381 | 0.010956 | -0.03952 | 0.05293  | 0.342195 | 0.551067 |
| P09012 | U1 small nt SNRPA      | 0.390584 | 0.597902 | 0.440162 | 0.309328 | 1        | 0.533035 | 0.089267 | 0.557995 | 1.071287 | 1.58053  |
| P09104 | Gamma-en ENO2          | -0.09738 | -0.17237 | 0.082083 | 0.151826 | 0.237869 | 0.237467 | 0.235449 | 0.42339  | 0.778221 | 0.741894 |
| P09110 | 3-ketoacyl- ACAA1 ACA  | 0.678829 | 0.763239 | 1.0925   | 1.037153 | 1.22981  | 0.886343 | 1.110747 | 0.790904 | 1.475627 | 1.409495 |
| P09132 | Signal reco SRP19      | -0.55486 | -0.72519 | 0.020095 | 0.254951 | 0.309143 | -0.03843 | 0.049596 | -0.19774 | -0.2664  | 0.055228 |
| P09234 | U1 small nt SNRPC      | -0.10697 | -0.23676 | -0.2811  | -0.04182 | -0.44142 | -0.18081 | -0.236   | -0.43864 | -0.03436 | 0.245943 |



|        |                         |          |          |          |          |          |          |          |          |          |          |
|--------|-------------------------|----------|----------|----------|----------|----------|----------|----------|----------|----------|----------|
| P09326 | CD48 antig CD48 BCM:    | 0.662745 | 0.695963 | 0.53082  | 0.367628 | 0.706269 | 0.312775 | 0.474176 | 0.515993 | 0.437079 | 0.595044 |
| P09382 | Galectin-1 LGALS1       | 1.570154 | 1.791174 | 1.661839 | 1.686502 | 1.199012 | 0.949349 | 1.57347  | 1.576475 | 0.567896 | 0.725969 |
| P09429 | High mobili HMGB1 HM    | 1.178228 | 1.200712 | 1.216811 | 1.16853  | 1.054723 | 1.090032 | 0.826233 | 1.219937 | 1.377073 | 1.198166 |
| P09467 | Fructose-1, FBP1 FBP    | -0.53509 | -0.12366 | -2.9979  | -1.41459 | -1.08514 | -0.39493 | -0.21316 | -0.55328 | 0.472874 | 0.213614 |
| P09496 | Clathrin ligl CLTA      | 0.64796  | 0.690782 | 0.257576 | 0.192918 | 0.474564 | 0.064623 | 0.287402 | 0.156406 | 0.341835 | 0.20688  |
| P09497 | Clathrin ligl CLTB      | 0.130255 | 0.206026 | 0.781501 | 0.516454 | 0.194503 | 0.014995 | 0.177861 | -0.04819 | 0.514102 | -0.00443 |
| P09525 | Annexin A4 ANXA4 AN)    | 0.239609 | 0.310969 | -0.2185  | -0.152   | -0.61123 | 0.130532 | 0.387926 | -0.37737 | -1.07748 | -1.14906 |
| P09543 | 2',3'-cyclic- CNP       | 0.498011 | 0.335815 | 0.417216 | 0.525006 | 0.498628 | 0.529149 | 0.429805 | 0.345662 | 0.454277 | 0.380323 |
| P09564 | T-cell antig CD7        | -1.78629 | -2.2276  | -2.20945 | -1.82312 | -3.07635 | -1.45943 | -1.46713 | -1.63743 | -1.46297 | -1.55431 |
| P09622 | Dihydrolipe DLD GCSL L  | 0.781139 | 0.483276 | 0.730713 | 0.589138 | 0.699295 | 0.625931 | 0.779312 | 0.923587 | 0.840644 | 0.513302 |
| P09651 | Heterogen HNRNPA1 H     | -0.01863 | 0.042266 | 0.227365 | 0.001008 | -0.04166 | -0.19265 | 0.049833 | -0.04492 | 0.262382 | 0.265601 |
| P09661 | U2 small nt SNRPA1      | 0.018072 | -0.18265 | 0.01165  | 0.049328 | 0.154975 | -0.27621 | -0.1452  | 0.136462 | 0.736966 | 0.749304 |
| P09669 | Cytochrom COX6C         | 2.530398 | 1.930098 | 1.633525 | 1.105795 | 0.907882 | 1.938599 | 2.078406 | 2.039528 | 0.925007 | 0.385981 |
| P09693 | T-cell surfa CD3G T3G   | -1.3769  | -0.91667 | -1.10113 | -1.65553 | -1.60062 | -0.98622 | -1.16569 | -1.59526 | -0.97377 | -0.74461 |
| P09874 | Poly [ADP-ri PARP1 ADP  | 1.047697 | 1.231615 | 0.959731 | 1.012491 | 1.026556 | 0.868495 | 0.99744  | 0.973816 | 0.91003  | 0.665292 |
| P09913 | Interferon- IFIT2 CIG-4 | -0.6002  | -1.08017 | -1.19153 | -1.35364 | -0.92749 | -1.14958 | -1.06274 | -1.1193  | -0.24616 | -0.43584 |
| P09914 | Interferon- IFIT1 G10P: | 0.121991 | 0.269518 | -1.20717 | -1.76335 | -0.12418 | -0.33015 | -1.78286 | -1.96783 | -1.64901 | -1.33668 |
| P09960 | Leukotrien LTA4H LTA:   | 0.431612 | 0.399356 | -0.0041  | 0.006259 | 0.251836 | 0.217701 | 0.26984  | 0.246722 | 0.297135 | 0.444457 |
| P09972 | Fructose-bi ALDOC ALC   | -0.27913 | -0.12562 | -0.33751 | -0.28325 | 0.017346 | -0.0176  | -0.24593 | -0.4243  | 0.124783 | 0.256405 |
| POC6T2 | Dolichyl-di OST4        | -0.60853 | -0.90501 | -1.01201 | 0.3101   | -0.3344  | -0.33555 | -0.88327 | 0.598199 | -0.90668 | -0.22083 |
| POC7P0 | CDGSH iror CISD3        | 1.663557 | 1.784179 | 1.130016 | 1.321284 | 1.62117  | 1.630134 | 1.725488 | 1.763651 | 1.510144 | 1.20582  |
| POC7X5 | Zinc finger ZNF806      | 1.436099 | 1.290393 | 0.26628  | 0.823395 | 0.594844 | 0.529253 | 0.826233 | 0.331059 | -0.1913  | -0.11511 |
| POC870 | Bifunction JMJD7        | -0.63743 | -0.52576 | -0.67963 | -0.44461 | -1.12418 | -0.42234 | -0.3322  | -0.19592 | -0.38702 | -0.60726 |
| PODJDO | RANBP2-lik RGPD1 RAN    | -3.80735 | -3.36146 | -4.00782 | -3.38606 | -2.89947 | -3.65208 | -2.96963 | -2.76783 | -4.3505  | -3.1788  |
| PODMV9 | Heat shock HSPA1B HS    | 0.674193 | 0.726884 | 1.262459 | 1.193809 | 1.237574 | 1.178924 | 1.046075 | 1.116544 | 0.973229 | 0.994294 |
| PODP25 | Calmodulin CALM3 CAL    | 1.207477 | 1.213452 | -0.01507 | 0.182768 | 0.258055 | 0.208527 | 0.270413 | 0.344493 | 0.174488 | -1.04495 |
| PODPB6 | DNA-direct POLR1D       | -0.34023 | -0.16069 | -0.03953 | 0.079322 | -0.10806 | 0.321928 | 0.195839 | 0.4236   | 0.470533 | 0.530855 |
| P10109 | Adrenodox FDX1 ADX      | -2.64689 | -1.45457 | -1.41244 | -2.03814 | -2.84503 | -3       | -2.16227 | -1.56789 | -2.00946 | -1.64829 |
| P10124 | Serglycin ( SRGN PRG    | -0.37467 | 0.019678 | -0.39696 | -0.10661 | -0.56982 | -0.37093 | -0.51782 | -0.35486 | -0.93254 | -1.96505 |
| P10155 | 60 kDa SS-1 RO60 SSA2   | 0.093867 | 0.094572 | 0.101614 | 0.165737 | -0.28703 | -0.1989  | 0.02032  | -0.23581 | -0.04793 | -0.04952 |
| P10253 | Lysosomal GAA           | -1.94062 | -1.57719 | -1.5427  | -1.0126  | -1.71727 | -2.06711 | -1.81762 | -1.78746 | -2.14886 | -2.1008  |
| P10398 | Serine/thre ARAF ARAF   | -1.64689 | -2.17383 | 1.153367 | 0.765535 | 0.996277 | 1.388148 | 1.171061 | 1.261125 | 1.250407 | 1.944743 |
| P10412 | Histone H1 H1-4 H1F4    | 0.082462 | 0.852323 | 1.208399 | 0.961865 | 1.348454 | 1.032421 | 1.744619 | 1.344648 | 1.320041 | 1.479408 |

|        |                        |          |          |          |          |          |          |          |          |          |          |
|--------|------------------------|----------|----------|----------|----------|----------|----------|----------|----------|----------|----------|
| P10415 | Apoptosis r BCL2       | -0.3072  | -0.46341 | -0.48241 | -0.24617 | -0.46294 | 0.132877 | 0.049732 | -0.38461 | -0.71275 | -0.15539 |
| P10515 | Dihydrolipe DLAT DLTA  | 1.093229 | 1.073348 | 1.336925 | 0.969451 | 0.880919 | 1.359673 | 1.42614  | 1.296762 | 1.176031 | 0.753419 |
| P10606 | Cytochrom COX5B        | 2.217622 | 2.055458 | 1.990219 | 1.705257 | 1.662182 | 1.915608 | 1.904843 | 1.790904 | 1.548356 | 1.342409 |
| P10619 | Lysosomal CTSA PPGB    | -1.02445 | -1.10512 | -1.28345 | -1.3377  | -2.84503 | -0.95693 | -1.04152 | -1.72935 | -1.78165 | -1.70487 |
| P10644 | cAMP-depe PRKAR1A P    | 0.144101 | 0.186295 | 0.462964 | 0.330748 | 0.23969  | 0.636609 | -0.02675 | -0.13808 | 0.218067 | 0.426574 |
| P10720 | Platelet fac PF4V1 CXC | 0.138605 | 0.108863 | 0.335897 | 0.165737 | 0.699295 | 0.402689 | 1.005107 | 0.926602 | 0.778786 | 0.744029 |
| P10746 | Uroporphyr UROS        | 0.484775 | 0.274743 | 0.360322 | 0.020594 | 0.249656 | -0.22186 | 0.216927 | 0.099447 | 0.609093 | 0.747794 |
| P10768 | S-formylglu ESD        | 0.297001 | 0.463601 | 0.069805 | 0.238435 | -0.2076  | 0.010521 | 0.29969  | 0.047538 | 0.434414 | 0.354794 |
| P10809 | 60 kDa hea HSPD1 HSP   | 0.466058 | 0.559448 | 0.961899 | 0.686987 | 0.756324 | 0.785329 | 0.882816 | 0.844239 | 1.12674  | 0.981668 |
| P11021 | Endoplasm HSPA5 GRP    | 0.648214 | 0.686416 | 0.810693 | 0.863347 | 0.411314 | 0.600183 | 0.384986 | 0.606153 | 0.426247 | 0.276981 |
| P11142 | Heat shock HSPA8 HSC   | 0.489946 | 0.396397 | 0.571906 | 0.498806 | 0.697526 | 0.399121 | 0.325095 | 0.554102 | 0.675708 | 0.898579 |
| P11169 | Solute carr SLC2A3 GLI | 0.296866 | -0.02617 | -0.97898 | -1.45964 | -0.621   | -0.31654 | -0.49479 | -0.52018 | -0.73383 | -0.72169 |
| P11171 | Protein 4.1 EPB41 E41I | -0.13878 | -0.11037 | -0.22584 | 0.022499 | 0.448151 | 0.053996 | 0.273768 | 0.197244 | 0.208137 | 0.166063 |
| P11177 | Pyruvate de PDHB PHE1  | -0.15567 | 0.118218 | -0.17508 | -0.66393 | -0.15998 | -0.05249 | -0.22352 | -0.20146 | -0.03949 | -0.2665  |
| P11182 | Lipoamide DBT BCATE    | -0.58193 | -0.53703 | -1.39183 | -1.24558 | -1       | -1.14958 | -0.69661 | -0.848   | -0.95361 | -0.85688 |
| P11216 | Glycogen p PYGB        | -0.04307 | 0.218756 | 0.186295 | 0.435281 | 0.160197 | 0.192871 | 0.079617 | -0.04654 | -0.03339 | 0.194304 |
| P11274 | Breakpoint BCR BCR1 I  | -0.86422 | -0.53856 | -0.16152 | -0.3517  | -1.26006 | -0.98911 | -1.22069 | -1.45372 | -1.15936 | -0.50952 |
| P11279 | Lysosome-i LAMP1       | 0.343924 | 0.733487 | 0.280182 | 0.37778  | 0.393608 | 0.342115 | 0.263873 | 0.370072 | -0.07334 | -0.31774 |
| P11310 | Medium-cl ACADM        | 0.110807 | -0.04354 | 0.582361 | 0.646363 | 0.043041 | 0.31755  | 0.740032 | 0.684498 | 0.082462 | 0.039289 |
| P11387 | DNA topois TOP1        | 0.479567 | 0.471434 | 0.209171 | 0.329436 | 0.589912 | 0.189226 | 0.411195 | 0.212545 | 0.002983 | 0.013216 |
| P11413 | Glucose-6-  G6PD       | -0.15808 | -0.19342 | -0.43831 | -0.5021  | -0.37386 | -0.37167 | -0.353   | -0.474   | -0.34112 | -0.38589 |
| P11441 | Ubiquitin-li UBL4A DXS | -0.76546 | -0.19837 | -0.38404 | -0.66954 | -0.85681 | -0.92437 | -0.27644 | -1.25322 | -0.9376  | -0.03365 |
| P11586 | C-1-tetrahy MTHFD1 M   | 0.105182 | 0.223338 | 0.101614 | -0.08264 | -0.06853 | -0.46697 | 0.030374 | -0.12553 | -0.21847 | -0.0223  |
| P11717 | Cation-indε IGF2R MPR  | -0.11769 | 0.017938 | -0.75107 | -0.62919 | -0.94581 | -0.3045  | 0.005782 | 0.028498 | -0.7577  | -1.21431 |
| P11766 | Alcohol del ADH5 ADH   | 1.611568 | 1.513071 | 1.240491 | 1.258532 | 1.212845 | 1.358349 | 1.471576 | 1.188235 | 1.401242 | 1.30017  |
| P11908 | Ribose-phc PRPS2       | 1.165878 | 1.288798 | 0.721284 | 0.638326 | 0.91184  | 1.172352 | 1.209177 | 1.185111 | 1.252387 | 1.14112  |
| P11940 | Polyadenyl PABPC1 PA   | 0.089111 | 0.518467 | 0.019365 | 0.4899   | 0.365871 | 0.334984 | 0.449163 | 0.294183 | 0.04182  | 0.198166 |
| P12004 | Proliferatin PCNA      | -0.23724 | -0.22625 | 0.69262  | 0.525197 | 0.616374 | 0.321478 | -0.06571 | 0.130904 | 0.565979 | 0.770213 |
| P12074 | Cytochrom COX6A1 CC    | 0.180805 | 0.169215 | 0.741918 | 0.6067   | 0.924949 | 0.637939 | 0.925524 | 0.875081 | 0.688328 | 1.141956 |
| P12110 | Collagen al COL6A2     | -3.08746 | -2.38163 | -2.4021  | -1.21613 | -2.42999 | -3.1375  | -3.05209 | -2       | -1.81444 | -1.8893  |
| P12235 | ADP/ATP tr SLC25A4 AI  | -0.86713 | -0.5063  | -0.74853 | -0.36985 | -0.80867 | -1.0366  | -0.96122 | -2.20625 | -1.19234 | -1.62622 |
| P12268 | Inosine-5'-r IMPDH2 IV | 0.035013 | 0.25748  | 0.759542 | 0.803948 | 0.346311 | 0.392196 | 0.576328 | 0.644772 | 0.962905 | 0.825281 |
| P12270 | Nucleoprot TPR         | -0.22948 | -0.1002  | 0.23183  | 0.13213  | 0.342411 | 0.078976 | 0.190084 | 0.232165 | 0.160465 | 0.257843 |

|        |                        |          |          |          |          |          |          |          |          |          |          |
|--------|------------------------|----------|----------|----------|----------|----------|----------|----------|----------|----------|----------|
| P12544 | Granzyme / GZMA CTL    | 0.682611 | 0.852797 | -0.16944 | -0.11078 | 0.065423 | 0.577658 | 0.168788 | 0.406424 | -1.05935 | -1.64829 |
| P12694 | 2-oxoisova BCKDHA      | -0.13993 | -0.15634 | -0.74727 | -0.58405 | -0.8055  | -0.5366  | -0.30666 | -0.5764  | -0.43608 | -0.79823 |
| P12814 | Alpha-actir ACTN1      | 0.909313 | 0.944389 | -0.31336 | 0.275623 | -0.24034 | 0.857848 | 0.452803 | 0.280108 | 0.393624 | 0.608932 |
| P12955 | Xaa-Pro diğ PEPD PRD   | 0.078635 | 0.427028 | -0.37239 | 0.011337 | -0.64717 | -0.38484 | -0.2165  | -0.42271 | -0.93964 | -1.00767 |
| P12956 | X-ray repai XRCC6 G22  | 0.227606 | 0.741847 | 0.565311 | 0.366298 | 0.447208 | 0.346747 | 0.611896 | 0.486043 | 0.580232 | 0.883213 |
| P13010 | X-ray repai XRCC5 G22  | 0.543086 | 0.775554 | 0.527501 | 0.516454 | 0.67155  | 0.37933  | 0.417172 | 0.479946 | 0.649475 | 0.845421 |
| P13073 | Cytochrom COX4I1 CO    | 0.93879  | 0.582915 | -0.37656 | -0.41044 | -0.38495 | 0.343623 | -0.22687 | 0.010213 | -0.87575 | -0.89932 |
| P13489 | Ribonuclea RNH1 PRI R  | 0.208432 | 0.350432 | 0.60817  | 0.50763  | 0.520278 | 0.559232 | 0.460361 | 0.367016 | 0.816754 | 0.622815 |
| P13501 | C-C motif c CCL5 D17S  | -0.5915  | -0.2111  | -0.72728 | -0.5516  | -1.33666 | -1.13826 | -0.79256 | -0.76582 | -2.69146 | -2.7669  |
| P13612 | Integrin alç ITGA4 CD4 | -0.30236 | -0.07195 | -0.09259 | -0.0906  | -0.34252 | 0.533035 | 0.380085 | 0.308122 | -0.32075 | -0.46609 |
| P13639 | Elongation EEF2 EF2    | 1.044351 | 1.072721 | 0.584963 | 0.693669 | 0.778899 | 0.459432 | 0.755266 | 0.648429 | 0.803308 | 0.895753 |
| P13667 | Protein dis PDIA4 ERP  | 0.612977 | 0.852323 | 0.627347 | 0.62595  | 0.399746 | 0.435386 | 0.489805 | 0.44907  | 0.459121 | 0.295324 |
| P13693 | Translation TPT1       | 0.391369 | 0.458315 | 0.484899 | 0.296713 | 0.607774 | 0.266622 | 0.347845 | 0.413683 | 0.690193 | 0.593642 |
| P13716 | Delta-amin ALAD        | -0.21534 | -0.28821 | -0.89476 | -0.86821 | -0.63413 | -0.635   | -0.21474 | -1       | -0.32075 | -0.04952 |
| P13747 | HLA class I HLA-E HLA- | 0.04182  | -0.09675 | 0.892785 | 1.052355 | 0.377367 | 0.402689 | 0.418869 | 0.573467 | 0.301033 | 0.527789 |
| P13796 | Plastin-2 (L LCP1 PLS2 | 1.119203 | 1.315676 | -0.08961 | 0.00971  | -0.35202 | 0.665948 | 0.391809 | 0.179365 | 0.055495 | -0.54091 |
| P13798 | Acylamino- APEH D3F1   | -0.17763 | -0.02024 | -0.18607 | 0.174698 | -0.22676 | -0.12285 | -0.21225 | 0.001676 | -0.08356 | -0.3796  |
| P13804 | Electron tra ETFA      | 0.554081 | 0.468619 | 0.618366 | 0.701404 | 0.394441 | 0.470045 | 0.680628 | 0.733527 | 0.80185  | 0.383708 |
| P13807 | Glycogen [ç GYS1 GYS   | -2.81741 | -1.98608 | -2.56306 | -2.32227 | -2.39489 | -2.18727 | -2.24335 | -2.18667 | -2.31721 | -1.85661 |
| P13861 | cAMP-depe PRKAR2A P    | -0.09768 | -0.04248 | -0.28545 | -0.05913 | -0.28694 | -0.38618 | -0.43731 | -0.22947 | -0.78165 | -0.31582 |
| P13984 | General tra GTF2F2 RA  | -0.27644 | -0.36512 | -0.25759 | -0.34573 | -0.4175  | -0.53269 | -0.49213 | -0.48303 | -0.46977 | -0.18886 |
| P13987 | CD59 glyco CD59 MIC1   | -0.00607 | 0.019365 | -0.45457 | 0.097024 | -0.57755 | -0.03877 | -0.17955 | -0.34066 | -0.57089 | -0.3375  |
| P14151 | L-selectin ( SELL LNHR | 0.031057 | 0.377226 | -0.22108 | -0.28622 | -0.29659 | -0.6506  | -0.62837 | -0.72002 | 0.573049 | 0.305201 |
| P14174 | Macrophag MIF GLIF M   | 0.275107 | 0.223506 | -0.00782 | 0.324435 | -1.9721  | -1.89022 | -1.71368 | -1.75892 | 0.722752 | 0.474639 |
| P14209 | CD99 antig CD99 MIC2   | 0.552998 | 0.630846 | 0.089183 | 0.395104 | -0.27795 | -0.05499 | 0.100879 | 0.063514 | -0.21787 | -0.64352 |
| P14210 | Hepatocyte HGF HPTA    | 0.38514  | 0.335639 | -0.29075 | -0.51482 | 0.150633 | -0.01498 | 0.107548 | -0.0763  | -0.34354 | -0.44699 |
| P14222 | Perforin-1 ( PRF1 PFP  | -1.34023 | -1.13906 | -1.20665 | -0.5142  | -1.93811 | -1.47574 | -1.14458 | -1.84437 | -1.54915 | -1.78877 |
| P14314 | Glucosidas PRKCSH G1   | 0.074165 | 0.175107 | 0.10341  | 0.314901 | -0.11345 | 0.048024 | 0.173474 | -0.12176 | 0.075724 | -0.00694 |
| P14317 | Hematopoi HCLS1 HS1    | -0.07928 | 0.032032 | 0.213448 | -0.09983 | 0.062566 | -0.12437 | 0.26984  | 0.303491 | 0.422092 | 0.353976 |
| P14324 | Farnesyl py FDPS FPS K | 0.181093 | -0.03773 | -0.14487 | -0.42617 | -0.46818 | -0.3427  | -0.51367 | -0.07792 | -0.01463 | 0.074139 |
| P14406 | Cytochrom COX7A2 CC    | 1.099536 | 0.97443  | 0.758637 | 1.082288 | 0.411314 | 1.386058 | 1.161945 | 1.053387 | 0.494156 | 0.320157 |
| P14550 | Aldo-keto r AKR1A1 AL  | 0.953496 | 0.966975 | 1.142568 | 1.27552  | 1.134125 | 1.354191 | 1.305897 | 1.237881 | 0.517399 | 0.676411 |
| P14618 | Pyruvate ki PKM OIP3 I | 0.598184 | 0.392677 | 0.314109 | 0.320563 | 0.410334 | 0.467359 | 0.355583 | 0.383728 | 0.592202 | 0.559495 |

|        |                        |          |          |          |          |          |          |          |          |          |          |
|--------|------------------------|----------|----------|----------|----------|----------|----------|----------|----------|----------|----------|
| P14625 | Endoplasm HSP90B1 G    | -0.23793 | 0.357349 | 0.411133 | 0.204358 | 0.072512 | -0.00898 | 0.057345 | -0.01728 | -0.01896 | -0.26658 |
| P14678 | Small nucle SNRPB COE  | 1.828207 | 1.870221 | 1.057783 | 1.523198 | 1.225823 | 1.697018 | 1.642561 | 1.829716 | 1.539069 | 1.274486 |
| P14854 | Cytochrom COX6B1 CC    | -1.23661 | -1.10512 | -0.70867 | -1.40453 | -1.28654 | -1.22914 | -1.0721  | -1.07784 | -0.96536 | -0.84304 |
| P14866 | Heterogeni HNRNPL HI   | -0.06193 | 0.364521 | 0.426786 | 0.314372 | 0.31527  | 0.236414 | 0.261328 | 0.251507 | 0.56277  | 0.505048 |
| P14868 | Aspartate-- DARS1 DAF  | 0.630638 | 0.569645 | -0.21403 | -0.16434 | -0.06075 | 0.053628 | 0.02878  | -0.02961 | -0.06947 | -0.08044 |
| P14921 | Protein C-e ETS1 EWSR  | 2.370797 | 2.301509 | 0.434403 | 0.84101  | 0.245577 | 1.441435 | 1.222392 | 0.644772 | 1.039528 | 0.555154 |
| P14927 | Cytochrom UQCRB UQ     | 0.41743  | 0.355909 | -0.88028 | -0.09417 | -0.47122 | -0.14354 | 0.384947 | -0.31018 | -0.49561 | -1.10018 |
| P15121 | Aldo-keto r AKR1B1 AL  | 0.931731 | 1.133954 | 0.834616 | 0.991599 | 1.018487 | 1.308478 | 1.22928  | 1.241889 | 1.127635 | 1.121665 |
| P15153 | Ras-relatec RAC2       | 1.674476 | 2.012046 | 1.465205 | 1.341444 | 1.374704 | 1.157902 | 1.600629 | 1.143581 | 1.167171 | 1.404784 |
| P15170 | Eukaryotic GSPT1 ERF   | 0.074007 | -0.25061 | -0.18265 | -0.31312 | -0.32379 | -0.21628 | -0.15846 | -0.12942 | -0.07748 | 0.03065  |
| P15289 | Arylsulfata: ARSA      | -1.70499 | -1.27399 | -1.41244 | -3.14505 | -1.87199 | -1.31647 | -1.69661 | -1.76783 | -2.04793 | -3.1008  |
| P15311 | Ezrin (Cyto EZR VIL2   | 0.080232 | 0.521187 | 0.801774 | 0.840993 | 0.652753 | 0.484898 | 0.730813 | 0.743357 | 0.341715 | 0.50614  |
| P15336 | Cyclic AMP ATF2 CREB   | -0.68536 | -0.58301 | -0.51457 | -0.66558 | -0.62263 | -0.71348 | -0.68834 | -0.848   | -0.67996 | 0.155098 |
| P15374 | Ubiquitin c UCHL3      | 0.292727 | 0.388639 | 0.168283 | -0.08964 | 0.216925 | 0.150833 | 0.120512 | -0.09183 | 0.372318 | 0.613379 |
| P15498 | Proto-oncc VAV1 VAV    | -2.59115 | -2.0157  | -1.68589 | -2.98307 | -1.81855 | -2.02203 | -3.24549 | -3.02609 | -2.1913  | -2.11991 |
| P15529 | Membrane CD46 MCP      | 0.366718 | 0.406457 | 0.86406  | 0.858567 | 0.584528 | 0.65272  | 0.731472 | 0.791652 | 0.555238 | 0.579767 |
| P15531 | Nucleoside NME1 NDP    | 0.955551 | 0.934185 | 0.797293 | 0.707955 | 0.907882 | 0.915608 | 0.785261 | 0.926602 | 1.108934 | 0.524716 |
| P15586 | N-acetylglu GNS        | -2.05993 | -1.90195 | -2.1965  | -2.2574  | -2.57363 | -2.64922 | -1.44199 | -2.51934 | -2.98201 | -2.25536 |
| P15848 | Arylsulfata: ARSB      | -3.19438 | -3.53138 | -4.94642 | -4.03814 | -3.01495 | -4.1375  | NA       | NA       | -4.3505  | -3.26127 |
| P15880 | 40S ribosor RPS2 RPS4  | 1.050626 | 1.032768 | 1.32546  | 1.125045 | 1.444481 | 1.280674 | 1.290155 | 1.152003 | 1.370146 | 1.321928 |
| P15927 | Replication RPA2 REPA  | -0.12363 | 0.124492 | 0.226842 | 0.15451  | 0.294905 | 0.053638 | 0.278301 | 0.005714 | 0.289507 | 0.50614  |
| P15954 | Cytochrom COX7C        | 1.624818 | 1.451612 | 0.80624  | 0.809146 | 0.544745 | 1.217701 | 1.274077 | 0.662965 | 0.218346 | -0.42986 |
| P16070 | CD44 antig CD44 LHR P  | 0.762164 | 0.354315 | 0.927939 | 0.499896 | 0.794089 | 0.995338 | 0.993402 | 0.808328 | 0.844613 | 0.7015   |
| P16104 | Histone H2 H2AX H2AF   | 0.963163 | 2.020327 | 1.775819 | 2.020243 | 2.151631 | 1.856473 | 2.194722 | 2.112832 | 1.436099 | 1.576084 |
| P16150 | Leukosialin SPN CD43   | -0.19025 | -0.29321 | -0.92706 | -1.5991  | -1.35472 | -1.19016 | -1.69076 | -0.90823 | -0.64228 | -0.50428 |
| P16152 | Carbonyl re CBR1 CBR C | -1.39977 | -0.88741 | -1.5541  | -1.3377  | -1.2076  | -0.93224 | -1.38466 | -1.02158 | -0.58651 | -0.85244 |
| P16219 | Short-chair ACADS      | -0.18746 | -0.10093 | -0.36146 | -0.39428 | -0.19903 | 0.14543  | -0.19704 | -0.35523 | -1.13845 | -1.28264 |
| P16220 | Cyclic AMP CREB1       | -1.07289 | -1.01577 | -1.05515 | -1.38606 | -1.22205 | -0.99501 | -1.36828 | -1.15761 | -1.09879 | -0.59482 |
| P16278 | Beta-galact GLB1 ELNR  | 1.588998 | 1.717732 | 0.60561  | 0.38813  | 0.134797 | 0.494765 | 0.605282 | -0.1635  | -0.67996 | -0.69052 |
| P16284 | Platelet eni PECAM1    | -1.70499 | -1.50901 | -1.88753 | -2.84549 | -1.76702 | -1.48981 | -1.7997  | -2.88982 | -1.55695 | -1.66223 |
| P16298 | Serine/thre PPP3CB CA  | -0.02445 | 0.015513 | 0.030861 | -0.05759 | 0.427993 | 0.394398 | -0.53222 | -0.07039 | -0.46949 | 0.034976 |
| P16333 | Cytoplasmic NCK1 NCK   | -1.12584 | -1.06405 | -0.7112  | -0.43368 | -0.61978 | -0.85752 | -1.65892 | -0.7087  | -0.85998 | -0.8267  |
| P16383 | Intron Larg GCFC2 C2o  | -0.89482 | -0.78991 | -1.34156 | -0.95067 | -2.69302 | -1.03317 | -0.97968 | -0.96605 | -1       | -0.93088 |

|        |                        |          |          |          |          |          |          |          |          |          |          |
|--------|------------------------|----------|----------|----------|----------|----------|----------|----------|----------|----------|----------|
| P16401 | Histone H1 H1-5 H1F5   | 0.395201 | 1.009715 | 0.781501 | 0.810659 | 0.624613 | -0.23136 | 0.784601 | 0.515624 | 0.14919  | -0.22979 |
| P16402 | Histone H1 H1-3 H1F3   | 0.265054 | 2.604969 | -0.05206 | 0.407431 | 0.652753 | 0.028492 | 0.374618 | 0.090184 | 0.018737 | 0.655828 |
| P16403 | Histone H1 H1-2 H1F2   | 0.921655 | 0.919793 | 1.191344 | 0.948172 | 1.275375 | 0.451461 | 1.613665 | 0.878069 | 0.512294 | 0.521011 |
| P16455 | Methylatec MGMT        | -0.14609 | -0.21185 | -0.19103 | 0.000641 | -0.44902 | -0.48359 | -0.29256 | -0.58068 | -0.08903 | -0.0726  |
| P16615 | Sarcoplasr ATP2A2 AT   | -0.666   | -0.83094 | -0.86982 | -0.92663 | -0.87341 | -1.07861 | -0.89162 | -1.10182 | -1.55695 | -1.31434 |
| P16871 | Interleukin IL7R       | -1.96408 | -0.93147 | -2.44143 | -2.37901 | -2.01777 | -2.5887  | -2.80688 | -2.15086 | -1.22396 | -0.93088 |
| P16949 | Stathmin (I LSTM1 C1c  | 0.931164 | 0.97103  | 0.701932 | 0.882085 | 0.429918 | 0.412775 | 0.593104 | 0.720784 | 0.791433 | 0.435903 |
| P16989 | Y-box-bindl YBX3 CSDA  | 0.826281 | 0.595323 | 0.718917 | 0.525197 | 0.923649 | 0.475242 | 0.730813 | 0.7022   | 0.882164 | 0.964155 |
| P17010 | Zinc finger ZFX        | -1.4221  | -0.84159 | -0.55229 | -0.45584 | -0.30884 | -0.06792 | -0.38059 | -0.72512 | -0.99659 | -1.04495 |
| P17026 | Zinc finger ZNF22 KOX  | -0.36112 | -0.55285 | -0.14984 | -0.61789 | -0.37456 | 0.203182 | 0.74925  | -0.75659 | -0.87924 | -1.45142 |
| P17028 | Zinc finger ZNF24 KOX  | 0.76696  | 1.005837 | 0.151613 | -0.20887 | 0.365871 | 0.079727 | 0.282513 | -0.18286 | 0.168877 | 0.309483 |
| P17050 | Alpha-N-ac NAGA        | -1.04933 | -0.85896 | 0.01165  | 0.061401 | -0.34252 | -0.03317 | 0.191366 | -0.39232 | -0.57089 | -0.09134 |
| P17066 | Heat shock HSPA6 HSP   | -0.55497 | -0.17823 | -0.37151 | -0.8011  | -0.72955 | -0.48981 | -1.08427 | -0.52607 | -0.71049 | -0.83303 |
| P17096 | High mobili HMGA1 HM   | 0.225541 | 0.182864 | 0.706612 | 0.685554 | 0.59539  | 0.485827 | 0.467475 | 0.302274 | 0.432995 | 0.437541 |
| P17174 | Aspartate a GOT1       | -0.47217 | -0.34307 | -0.68576 | -0.67689 | -0.68179 | -0.47949 | -0.85712 | -0.8511  | -0.75449 | -0.64296 |
| P17252 | Protein kin PRKCA PKC  | 0.133088 | 0.545434 | 0.203328 | 0.209792 | 1.011112 | 0.915608 | 0.553936 | 0.371448 | 0.776035 | 0.846029 |
| P17480 | Nucleolar t UBTF UBF l | 0.640458 | 0.589375 | 0.367839 | 0.520832 | 0.735478 | 0.451461 | 0.752232 | 0.534473 | 0.537335 | 0.400728 |
| P17535 | Transcripti JUND       | -1.05897 | -1.07683 | -0.42257 | -0.2612  | -0.74606 | -0.44055 | -0.63408 | -0.33276 | -0.80356 | -0.36125 |
| P17568 | NADH dehy NDUFB7       | -0.20406 | 0.002    | -0.66539 | -0.40555 | -0.55925 | -0.27536 | -0.0677  | -0.3643  | -1.19436 | -0.7857  |
| P17612 | cAMP-depe PRKACA PK    | 0.053549 | 0.451612 | 0.521187 | 0.650365 | 0.7175   | 0.68012  | 0.471473 | 0.754039 | 0.917538 | 1.114796 |
| P17655 | Calpain-2 c CAPN2 CAM  | -0.10428 | 0.155119 | -0.34156 | -0.13813 | -0.30529 | -0.26303 | -0.16801 | -0.17638 | -0.36257 | -0.41799 |
| P17676 | CCAAT/enh CEBPB TCF!   | -2.76553 | -2.5541  | -3.48699 | -2.9386  | -3.69302 | -3.45943 | -3.38466 | -3.33342 | -4.08746 | -3.13927 |
| P17706 | Tyrosine-pr PTPN2 PTP  | 0.234925 | 0.05009  | -0.66267 | -0.48723 | 0.093877 | -0.26042 | -0.62159 | -0.57085 | -0.85355 | -0.90884 |
| P17812 | CTP syntha CTPS1 CTP!  | 0.105182 | 0.243406 | -0.88033 | -0.05107 | -0.46036 | -1.12553 | -0.5175  | -0.6735  | -0.78165 | -0.72668 |
| P17844 | Probable A DDX5 G17F   | 0.609008 | 0.71792  | 0.65597  | 0.618865 | 0.443735 | 0.454784 | 0.703864 | 0.582267 | 0.508226 | 0.642099 |
| P17858 | ATP-depen PFKL         | 0.379705 | 0.332536 | 0.384498 | 0.735711 | 0.519028 | 0.555519 | 0.667804 | 0.569615 | 0.510796 | 0.70384  |
| P17931 | Galectin-3 lLGALS3 MA  | 1.667425 | 1.663375 | 1.027039 | 0.948926 | 1.261174 | 1.032421 | 1.709072 | 1.805718 | 0.756633 | 0.90157  |
| P17980 | 26S protea PSMC3 TBF   | 0.105864 | 0.030861 | 0.486931 | 0.359081 | 0.439006 | 0.471306 | 0.340229 | 0.303491 | 0.614398 | 0.582769 |
| P17987 | T-complex TCP1 CCT1    | 0.316165 | 0.551433 | 0.401911 | 0.120294 | 0.096902 | 0.338586 | 0.36212  | 0.115158 | 0.480629 | 0.487153 |
| P18031 | Tyrosine-pr PTPN1 PTP  | 0.143642 | -0.08779 | 0.211985 | -0.07237 | -0.4861  | -0.31278 | -0.08496 | -0.26397 | 0.050951 | -0.04039 |
| P18074 | General tra ERCC2 XPD  | -1.37126 | -2.26459 | -2.00782 | -3.32193 | -1.81855 | -3.04439 | -2.3322  | -1.91119 | -2.14886 | -2.34873 |
| P18077 | 60S ribosor RPL35A GIC | 2.631681 | 2.736576 | 2.388227 | 2.501024 | 2.003714 | 2.509235 | 2.963736 | 2.417183 | 1.748237 | 1.809882 |
| P18085 | ADP-ribosy ARF4 ARF2   | 1.572434 | 1.710435 | 0.581705 | 0.74592  | 0.497456 | 0.990058 | 0.954898 | 0.650525 | 0.500462 | 0.123971 |

|        |                        |          |          |          |          |          |          |          |          |          |          |
|--------|------------------------|----------|----------|----------|----------|----------|----------|----------|----------|----------|----------|
| P18124 | 60S ribosor RPL7       | 1.504045 | 1.462561 | 0.886471 | 0.664121 | 0.847076 | 0.679293 | 0.796606 | 0.76362  | 0.897428 | 1.047862 |
| P18206 | Vinculin (M VCL        | 0.059379 | 0.172522 | 0.249978 | 0.693669 | 0.043943 | 0.222392 | 0.06502  | -0.18938 | -0.00946 | -0.23499 |
| P18433 | Receptor-t PTPRA PTP   | -2.57289 | -2.44392 | -3.6734  | -2.98751 | -3.89947 | -3.58496 | -2.9301  | -3.65535 | -3.61353 | -2.37145 |
| P18583 | Protein SOISON C21or   | -0.41668 | -0.12056 | -0.09259 | -0.08394 | -0.34252 | -0.19265 | -0.50293 | -0.24936 | -0.14886 | -0.02024 |
| P18615 | Negative el NELFE RD F | -2.78041 | -2.02359 | -2.46529 | -2.7168  | -2.79256 | -2.87447 | -2.22342 | -2.32398 | -3.08746 | -1.98424 |
| P18621 | 60S ribosor RPL17      | 0.650259 | 0.482639 | 0.443033 | 0.503944 | 0.699295 | 0.250227 | 0.63111  | 0.24492  | 0.146    | 0.295128 |
| P18669 | Phosphogly PGAM1 PG    | 0.254929 | 0.597902 | 0.629657 | 0.241973 | 0.703976 | 0.362835 | 0.588353 | 0.232173 | 0.544994 | 0.680935 |
| P18754 | Regulator c RCC1 CHC1  | -0.25096 | -0.18255 | -0.20757 | -0.5881  | -0.37657 | -0.61876 | -0.41845 | -0.62907 | -0.21299 | -0.14856 |
| P18858 | DNA ligase LIG1        | -1.10218 | -1.16692 | -0.92369 | -1.19289 | -0.58118 | -1.12192 | -1.02589 | -1.31962 | -0.78523 | -0.78503 |
| P18859 | ATP syntha ATP5PF ATl  | -0.34593 | 0.025123 | -0.21129 | -0.20691 | -0.25584 | -0.02982 | -0.3235  | -0.08902 | -0.13819 | -0.22768 |
| P18887 | DNA repair XRCC1       | -0.97897 | -1.13017 | -1.20771 | -1.16165 | -1.14722 | -1.10002 | -1.85843 | -1.11226 | -1.3478  | -0.8785  |
| P19174 | 1-phosphat PLCG1 PLC:  | -0.2838  | 0.184506 | -0.34423 | -0.25388 | -0.24403 | -0.02327 | -0.30256 | -0.30497 | -0.06512 | 0.064599 |
| P19338 | Nucleolin (I NCL       | 0.791683 | 0.976413 | 0.749236 | 0.829634 | 0.797936 | 0.592067 | 0.74844  | 0.794074 | 1.18369  | 0.831648 |
| P19367 | Hexokinase HK1         | 0.905127 | 0.826516 | 0.796999 | 0.525191 | 0.766403 | 0.803359 | 0.782843 | 0.726233 | 0.492753 | 0.080851 |
| P19387 | DNA-direct POLR2C A-   | -0.64689 | -0.22304 | -0.41768 | -0.4581  | -0.09636 | -0.32344 | -0.34233 | -0.40563 | -0.13878 | -0.21486 |
| P19388 | DNA-direct POLR2E      | 0.633649 | 0.735375 | 0.375932 | 0.718084 | 0.640782 | 0.822881 | 0.874199 | 0.746076 | 0.722706 | 0.409845 |
| P19404 | NADH dehy NDUFV2       | -1.1004  | -0.60293 | -0.40816 | 0.044805 | -0.19322 | -0.29581 | -0.26681 | -0.31572 | -0.45216 | -0.42788 |
| P19447 | General tra ERCC3 XPB  | -0.8974  | -0.58351 | -0.24485 | -0.16698 | -0.21264 | -0.25745 | -0.63417 | -0.24831 | -0.16719 | -0.28474 |
| P19474 | E3 ubiquiti TRIM21 RN  | -0.03737 | -0.24206 | 0.007694 | 0.484947 | -0.2426  | -0.19277 | -0.09089 | -0.1103  | -0.19922 | -0.05954 |
| P19525 | Interferon- EIF2AK2 PK | 0.477126 | 0.224896 | 0.049509 | -0.02398 | 0.176182 | 0.239584 | 0.120482 | -0.00775 | 0.38161  | 0.163863 |
| P19623 | Spermidine SRM SPS1 S  | -0.46019 | -0.45992 | -0.41244 | -0.52356 | -0.37109 | -0.24998 | -0.46713 | -0.30485 | -0.22948 | -0.21945 |
| P19784 | Casein kina CSNK2A2 C  | 0.029995 | -0.42286 | -1.04757 | -0.79021 | -0.83173 | -0.74061 | -0.60039 | -1.03477 | -0.93546 | -0.60054 |
| P19838 | Nuclear fac NFKB1      | 0.286305 | 0.599102 | 0.148099 | 0.257002 | 0.200987 | 0.588601 | 0.117836 | 0.072569 | 0.281771 | 0.31564  |
| P19971 | Thymidine TYMP ECGF    | -2.68536 | -1.52015 | -1.7632  | -3.14505 | -3.2076  | -2.0902  | -2.16227 | -2.848   | -2.28011 | -2.08194 |
| P20020 | Plasma me ATP2B1 PM    | -1.89482 | -1.57719 | -1.46529 | -1.69574 | -3.51245 | -1.65208 | -1.41163 | -1.93289 | -2.32665 | -3.70487 |
| P20042 | Eukaryotic EIF2S2 EIF2 | 0.147752 | 0.273691 | -0.60962 | -0.81908 | -0.57071 | -0.89361 | -0.2878  | -0.81371 | -0.848   | -0.40664 |
| P20073 | Annexin A7 ANXA7 AN)   | -0.56393 | -0.35534 | -0.4736  | -0.42825 | -0.73574 | -0.36021 | -0.49658 | -0.39608 | -0.5332  | -0.36981 |
| P20290 | Transcripti BTF3 NACB  | -1.14216 | -0.92361 | -0.58301 | -0.62632 | -0.46404 | -0.71359 | -0.41696 | -0.64334 | -0.77397 | -0.53396 |
| P20292 | Arachidonase ALOX5AP F | 1.160465 | 1.057333 | 0.826171 | 1.176878 | 0.007417 | 0.135515 | 0.654865 | 0.157146 | -0.59918 | -0.53495 |
| P20339 | Ras-relatec RAB5A RAE  | -1.01404 | -0.52246 | -2.42286 | -2.8011  | -2.95606 | -3.0902  | -2.96963 | -3.1193  | -3.08746 | -3.34873 |
| P20585 | DNA mism: MSH3 DUC     | 0.529628 | 0.429292 | 0.466353 | 0.580982 | 0.640679 | 0.603961 | 0.487889 | 0.608191 | 0.409714 | 0.498138 |
| P20591 | Interferon- MX1        | 0.090729 | 0.208319 | 0.161423 | 0.327663 | -0.42    | -0.30293 | 0.303392 | 0.393407 | 0.104309 | -0.33209 |
| P20592 | Interferon- MX2        | 0.471504 | 0.393431 | 0.521187 | 0.425973 | 0.427993 | 0.529253 | 0.702799 | 0.893085 | 0.353637 | 0.676411 |

|        |                     |          |      |          |          |          |          |          |          |          |          |          |          |          |
|--------|---------------------|----------|------|----------|----------|----------|----------|----------|----------|----------|----------|----------|----------|----------|
| P20618 | Proteasom           | PSMB1    | PSC  | 0.324351 | 0.550733 | 0.133954 | -0.10402 | -0.02651 | 0.037755 | 0.222392 | 0.120752 | 0.218346 | 0.323697 |          |
| P20645 | Cation-dep          | M6PR     | MPR  | 0.80215  | 1.227686 | 0.408198 | 0.685891 | 0.043342 | 0.189226 | 0.47483  | 0.384664 | 0.104556 | -0.05591 |          |
| P20674 | Cytochrom           | COX5A    |      | 1.473159 | 1.143723 | 1.239651 | 1.215003 | 0.594768 | 1.602831 | 1.518142 | 1.427468 | 0.692338 | 0.515352 |          |
| P20700 | Lamin-B1            | LMNB1    | LM   | 0.498119 | 0.586946 | 0.542092 | 0.626666 | 0.342602 | 0.369234 | 0.480658 | 0.622633 | 0.845769 | 0.422761 |          |
| P20701 | Integrin α          | ITGAL    | CD1  | 0.154817 | 0.23469  | 0.030452 | -0.00651 | -0.1161  | -0.16175 | -0.19704 | -0.01728 | -0.47603 | -0.36573 |          |
| P20718 | Granzyme            | GZMH     | CGL  | 0.925361 | 1.158617 | 0.310969 | 0.043253 | -1.07635 | -0.61813 | 0.546949 | 0.061639 | -1.4245  | -1.2402  |          |
| P20810 | Calpastatin         | CAST     |      | 0.889813 | 0.735405 | 0.66799  | 0.853443 | 0.765813 | 0.841186 | 0.642877 | 0.502551 | 0.402078 | 0.590848 |          |
| P20839 | Inosine-5'-         | IMP      | DH1  | IV       | 0.245876 | 0.393312 | 0.218253 | 0.378867 | 0.079808 | -0.19394 | 0.276968 | 0.181426 | 0.055467 | 0.172283 |
| P20933 | N(4)-(beta-         | AGA      |      | -0.43539 | -0.90202 | -1.26545 | -1.90934 | -0.15697 | -0.36491 | -1.50718 | -1.39798 | -0.67243 | -1.0268  |          |
| P20962 | Parathymo           | PTMS     |      | 0.378109 | 0.816953 | 0.217778 | 0.180571 | -0.01214 | -0.56664 | 0.228669 | 0.378715 | -0.04331 | -0.44651 |          |
| P20963 | T-cell surfa        | CD247    | CD3  | -0.08104 | -0.20945 | 0.090652 | -0.27784 | 0.322995 | 0.18619  | 0.514867 | 0.026497 | 0.48614  | 0.650699 |          |
| P21127 | Cyclin-dep          | CDK11B   | CD   | -0.95987 | -1.01976 | -0.85329 | -1.22212 | -0.97451 | -1.25634 | -1.13105 | -1.15949 | -0.57417 | -0.18779 |          |
| P21266 | Glutathion          | GSTM3    | GST  | -1.76877 | -1.17286 | -2.33663 | -1.7688  | -2.15943 | -1.99264 | -2.73875 | -1.95501 | 0.377547 | 0.451165 |          |
| P21281 | V-type pro          | ATP6V1B2 |      | 1.491045 | 1.381508 | 1.591447 | 1.306795 | 1.59238  | 1.473275 | 1.26984  | 1.419325 | 1.591235 | 1.780555 |          |
| P21283 | V-type pro          | ATP6V1C1 |      | -0.43539 | -0.37656 | -1.43335 | -1.65567 | -0.97056 | -1.74061 | -1.29406 | -0.6644  | -0.4245  | -1.8893  |          |
| P21291 | Cysteine ar         | CSRP1    | CSRI | -0.59104 | -0.33241 | -0.16593 | -0.44461 | -0.24648 | -0.47107 | -0.5252  | -0.11697 | -0.55014 | -0.37718 |          |
| P21333 | Filamin-A           | FLNA     | FLN  | F        | 0.659946 | 0.795445 | 0.44734  | 0.546827 | 0.072356 | 0.243316 | 0.30953  | 0.25634  | -0.13402 | -0.11276 |
| P21399 | Cytoplasm           | ACO1     | IREB | -0.74908 | -0.74537 | -0.75694 | -0.81708 | -0.64572 | -0.85579 | -0.95964 | -0.95491 | -0.52795 | -0.63441 |          |
| P21580 | Tumor necr          | TNFAIP3  | O    | -0.04261 | -0.02586 | -0.54516 | -0.96605 | -0.86104 | -0.87157 | -0.1285  | 0.412964 | -0.83628 | -0.62677 |          |
| P21675 | Transcripti         | TAF1     | BA2R | -1.04933 | -0.78319 | -0.94642 | -0.46179 | -0.31451 | -1.22422 | -1.03103 | -1.22239 | -0.64208 | -1.04097 |          |
| P21796 | Voltage-de          | VDAC1    | VD   | 0.431818 | 0.500558 | -0.58717 | -0.24943 | -1.425   | -0.0586  | -0.24349 | -0.19736 | -1.15936 | -1.55431 |          |
| P21912 | Succinate c         | SDHB     | SDH  | -0.07309 | 0.054415 | 0.462972 | 0.299168 | -0.28995 | 0.5025   | 0.415037 | 0.494395 | 0.149745 | 0.053972 |          |
| P21953 | 2-oxoisova          | BCKDHB   |      | -0.41918 | 0.166921 | 0.248901 | 0.069817 | -0.83094 | 0.198143 | 0.286006 | -0.53269 | 0.007998 | 0.351144 |          |
| P21964 | Catechol O          | COMT     |      | 1.280788 | 1.141785 | 0.545159 | 1.032325 | 0.55431  | 0.317336 | 0.844672 | 0.217838 | 0.224241 | 0.077439 |          |
| P22033 | Methylmal           | MMUT     | MU   | -0.48663 | -0.49176 | -0.52887 | -0.38549 | -0.35211 | 0.012009 | -0.75573 | -0.3414  | -0.34055 | -0.39775 |          |
| P22059 | Oxysterol-          | OSBP     | OSBP | -0.26269 | -0.49462 | -0.38805 | -0.46022 | -0.5544  | -1.18684 | -1.32499 | -1.23135 | -0.79875 | -0.32608 |          |
| P22061 | Protein-L- <i>s</i> | PCMT1    |      | 0.852646 | 0.95367  | 0.680845 | 0.528307 | 1.271867 | 1.426221 | 0.7096   | 0.814857 | 1.003277 | 0.828863 |          |
| P22087 | rRNA 2'-O-          | FBL      | FIB1 | FL       | 0.580995 | 0.672423 | 0.345512 | 0.148863 | 0.905713 | 0.557784 | 0.60253  | 0.577263 | 0.553431 | 0.673021 |
| P22090 | 40S ribosom         | RPS4Y1   | RP   | 0.556393 | 0.590152 | -0.05971 | 0.176878 | -4.83813 | -2.54439 | 0.159657 | -0.22239 | 0.143492 | 0.155098 |          |
| P22102 | Trifunction         | GART     | PGFT | -0.57366 | -0.68077 | -0.59704 | -0.78402 | -1.00541 | -0.7857  | -0.52502 | -0.72512 | -1.1609  | -1.22291 |          |
| P22234 | Multifuncti         | PAICS    | ADE  | 0.605512 | 0.686134 | -0.29816 | -0.57499 | 0.319759 | 0.305824 | -0.51073 | -0.38828 | -0.15202 | 0.012791 |          |
| P22304 | Iduronate           | IDS      | SIDS | -1.38702 | -1.14768 | -0.63051 | -0.83426 | -1.74193 | -1.75899 | -1.71329 | -1.07039 | -2.06756 | -2.06333 |          |
| P22307 | Non-specifi         | SCP2     |      | 0.550639 | 0.365286 | 0.874229 | 0.755397 | 0.274891 | 0.423004 | 0.324436 | 0.576762 | 0.658043 | 0.580755 |          |

|        |                        |          |          |          |          |          |          |          |          |          |          |
|--------|------------------------|----------|----------|----------|----------|----------|----------|----------|----------|----------|----------|
| P22314 | Ubiquitin-li UBA1 A1S9 | 0.26     | 0.079643 | -0.2276  | 0.165737 | 0.364716 | 0.020811 | 0.071448 | 0.028345 | 0.100164 | 0.27594  |
| P22392 | Nucleoside NME2 NM2    | 1.42711  | 1.541421 | 1.009715 | 1.334419 | 1.117764 | 1.016302 | 1.141219 | 1.091498 | 1.080234 | 0.941291 |
| P22570 | NADPH:adr FXR ADXR     | -1.10944 | -1.10327 | -0.03221 | -0.20808 | -0.28455 | -0.20203 | -0.27323 | -0.07722 | -0.22023 | 0.412371 |
| P22626 | Heterogeni HNRNPA2B    | 0.222797 | 0.322918 | 0.589621 | 0.481137 | 0.541594 | 0.497335 | 0.475158 | 0.611435 | 0.943163 | 0.748573 |
| P22681 | E3 ubiquiti CBL CBL2 R | -1.7553  | -1.6502  | -1.8765  | -3.06519 | -1.30108 | -1.57169 | -2.32984 | -1.6775  | -1.2523  | -1.35168 |
| P22694 | cAMP-depe PRKACB       | 0.167112 | 0.132449 | 0.026397 | 0.07986  | 0.20912  | 0.136577 | 0.120837 | -0.06137 | 0.057849 | 0.082645 |
| P22695 | Cytochrom UQCRC2       | 0.926752 | 0.882029 | 0.010931 | 0.197276 | 0.118612 | 0.699016 | 0.888956 | 0.753946 | 0.489554 | -0.27867 |
| P22749 | Granulysin GNLY LAG2   | -0.59104 | -0.2185  | -0.07195 | -0.55087 | -0.84503 | -0.50524 | -0.74723 | -0.51785 | -1.37474 | -1.31531 |
| P22830 | Ferrochela FECH        | -0.51207 | -0.62968 | -0.69855 | -0.82848 | -1.42999 | -0.33821 | -0.75038 | -0.41199 | -1.17659 | -0.25722 |
| P23025 | DNA repair XPA XPAC    | 0.993925 | 0.670742 | 1.009715 | 0.638326 | 1.261174 | 0.932886 | 1.025356 | 1.110183 | -0.85487 | -1.58597 |
| P23193 | Transcripti TCEA1 GTF  | -0.08104 | 0.123525 | 0.220019 | 0.305486 | 0.411314 | -0.07424 | 0.027713 | 0.213981 | 0.219744 | 0.455165 |
| P23229 | Integrin alç ITGA6     | -0.12609 | -0.34872 | -0.11065 | -0.39024 | 0.094634 | -0.01668 | -0.3002  | -0.40814 | -0.14652 | 0.043219 |
| P23246 | Splicing fac SFPQ PSF  | 0.591392 | 0.735788 | 0.571906 | 0.496377 | 0.549834 | 0.468013 | 0.656414 | 0.654753 | 0.758815 | 0.763343 |
| P23258 | Tubulin gar TUBG1 TUB  | -0.21018 | 0.023302 | -0.08767 | -0.13686 | -0.50943 | -0.08558 | -0.11878 | 0.024929 | -0.02854 | -0.00817 |
| P23284 | Peptidyl-pr PPIB CYPB  | 1.009064 | 1.328153 | 1.388971 | 1.603659 | 1.3249   | 1.319741 | 1.224583 | 1.251539 | 1.301033 | 1.137101 |
| P23368 | NAD-deper ME2          | 0.596233 | 0.579754 | 0.449956 | 0.328597 | 0.517917 | 0.532718 | 0.580376 | 0.620094 | 0.366224 | 0.606593 |
| P23381 | Tryptophar WARS1 IFIE  | -0.98793 | -0.92405 | -1.08844 | -1.27563 | -0.9852  | -0.92545 | -1.66382 | -1.1571  | -1.22396 | -1.16882 |
| P23396 | 40S ribosor RPS3 OK/S  | 1.690145 | 1.624702 | 1.10282  | 1.179918 | 1.119822 | 1.118794 | 1.369402 | 1.086858 | 1.221612 | 1.147755 |
| P23434 | Glycine clei GCSH      | -0.78629 | -1.02359 | -2.58911 | -2.51907 | -2.53785 | -1.84049 | -2.28178 | -2.31575 | -2.13938 | -2.00068 |
| P23458 | Tyrosine-pr JAK1 JAK1A | -1.39563 | -0.49697 | -0.82363 | -0.77584 | -1.0893  | -0.66792 | -0.57192 | -1.40715 | -0.66982 | -0.90822 |
| P23497 | Nuclear aur SP100      | -0.818   | -0.48434 | -0.54594 | -0.51963 | -0.50245 | -0.59736 | -0.76451 | -0.28042 | -0.41202 | -0.49698 |
| P23511 | Nuclear tra NFYA       | 0.219141 | 0.245208 | 0.123197 | -0.41086 | 0.164848 | -0.04586 | 0.197214 | 0.047134 | 0.540707 | 0.968268 |
| P23526 | Adenosylhc AHCY SAHF   | 0.218924 | 0.332805 | 0.133954 | 0.430634 | 0.28273  | 0.005454 | 0.497073 | 0.312739 | 0.540274 | 0.628552 |
| P23528 | Cofilin-1 (1 CFL1 CFL  | 0.486724 | 0.843747 | 1.158308 | 0.993342 | 1.210659 | 0.96917  | 0.942872 | 1.136462 | 1.211563 | 1.151118 |
| P23588 | Eukaryotic EIF4B       | -0.69968 | -0.41543 | -0.36357 | -0.24455 | 0.065423 | 0.177806 | 0.339385 | 0.070159 | 0.089812 | -0.05871 |
| P23634 | Plasma me ATP2B4 AT    | -0.91046 | -0.65293 | -0.73658 | -0.36167 | -0.90759 | -0.55254 | -0.51027 | -0.52607 | -1.13179 | -1.41552 |
| P23743 | Diacylglyce DGKA DAG   | 1.298518 | 1.413604 | 0.788821 | 0.796506 | 1.060596 | 1.090555 | 1.043474 | 1.059482 | 1.122233 | 0.946195 |
| P23786 | Carnitine O CPT2 CPT1  | -1.51978 | -1.17383 | -2.17383 | -2.84549 | -2.69302 | -2.04439 | -2.03103 | -2.72935 | -3.00946 | -2.34873 |
| P23919 | Thymidylat DTYMK CDK   | 0.650343 | 0.626272 | 0.596788 | 0.49306  | 0.316475 | 0.3712   | 0.721892 | 0.673501 | 0.242445 | -0.02914 |
| P23921 | Ribonucleo RRM1 RR1    | -1.43539 | -2.12199 | -1.87317 | -2.75803 | -3.51245 | -2.2115  | -1.69661 | -3.02308 | -2.37474 | -1.90578 |
| P24390 | ER lumen p KDELR1 ER   | 0.648214 | 0.507538 | 0.878009 | 1.636309 | 0.91184  | 0.915608 | 0.532874 | 2.123382 | 0.973833 | 0.831181 |
| P24534 | Elongation EEF1B2 EEF  | -0.07464 | 0.165586 | 0.291986 | 0.331316 | 0.365871 | 0.551796 | 0.344264 | 0.251531 | 0.684936 | 0.809625 |
| P24539 | ATP syntha ATP5PB AT   | 1.941233 | 1.959469 | 1.235147 | 1.51426  | 1.183553 | 1.804229 | 1.821898 | 1.731804 | 1.048402 | 0.63016  |



|        |                                                           |          |          |          |          |          |          |          |          |          |          |
|--------|-----------------------------------------------------------|----------|----------|----------|----------|----------|----------|----------|----------|----------|----------|
| P24557 | Thromboxane synthase (TXAS1)                              | -0.7626  | -1.04399 | -0.91102 | -0.53681 | -1.60132 | -1.5127  | -1.01856 | -1.34396 | -2.48926 | -1.91877 |
| P24666 | Low molecular weight G-protein-coupled receptor 1 (ACYP1) | -2.68536 | -1.40239 | -1.35147 | -1.26053 | -2.74193 | -1.68684 | -1.51019 | -1.61973 | -1.30319 | -1.13927 |
| P24723 | Protein kinase C (PRKCH)                                  | -0.30986 | -0.38672 | -0.35709 | -0.31815 | -0.37502 | -0.25149 | -0.65574 | -0.43039 | -0.67243 | -0.74882 |
| P24752 | Acetyl-CoA acetyltransferase 1 (ACAT1)                    | 0.337965 | -0.01906 | 0.93826  | 0.781877 | 0.492844 | 0.539996 | 0.708956 | 0.690956 | 0.688056 | 0.706146 |
| P24928 | DNA-directed RNA polymerase II (POLR2A)                   | -0.42721 | -0.75659 | -0.58887 | -0.76867 | -0.41743 | -0.10603 | -0.89162 | -0.47743 | -0.31487 | -0.22979 |
| P24941 | Cyclin-dependent kinase 2 (CDK2)                          | -0.6054  | -0.22715 | -0.78884 | -0.52695 | -0.71206 | -1.10365 | -0.66289 | -0.95919 | -0.51542 | -0.26609 |
| P25098 | Beta-adrenergic receptor 2 (GRK2)                         | 0.208094 | 0.205552 | 0.341443 | 0.417645 | 0.319787 | 0.374586 | 0.326853 | 0.398656 | 0.292073 | 0.092564 |
| P25205 | DNA replication fork assembly factor 3 (MCM3)             | -0.00306 | -0.02822 | -0.25151 | -0.61092 | -1.2067  | -0.58217 | -0.43971 | -0.6029  | -0.28778 | -0.28904 |
| P25208 | Nuclear transcription factor YB (NFYB)                    | -1.08746 | -0.78991 | -0.60657 | -0.47917 | -0.89947 | -0.44448 | -0.66382 | -0.91119 | -0.66493 | -0.37145 |
| P25325 | 3-mercaptopropionyl-tRNA synthetase (MPST)                | 0.14632  | 0.090885 | -0.20535 | -0.13567 | -0.3109  | -0.53454 | 0.10334  | 0.061414 | -0.29339 | -0.35178 |
| P25391 | Laminin subunit gamma 1 (LAMA1)                           | 1.265054 | 1.263034 | 1.624702 | 1.402437 | 1.609541 | 1.673282 | 1.134244 | 1.253941 | 1.507484 | 1.485743 |
| P25398 | 40S ribosomal protein S12 (RPS12)                         | 1.129668 | 1.194051 | 1.116357 | 1.120294 | 1.248734 | 1.269921 | 1.148945 | 1.253941 | 1.477322 | 1.370145 |
| P25440 | Bromodomain protein 2 (BRD2)                              | 0.060258 | 0.150241 | 0.342033 | 0.656862 | -0.11941 | 0.43452  | -0.08541 | -1.08175 | 0.175153 | 0.070677 |
| P25445 | Tumor necrosis factor receptor type 1 (FAS)               | -0.12797 | 0.049873 | -0.48835 | -0.90298 | -0.59921 | -1.09888 | -0.89128 | -0.86626 | -0.90866 | -1.23376 |
| P25490 | Transcription factor YY1 (INO80B)                         | -0.13135 | 0.210086 | 0.425721 | 0.961865 | 0.748815 | 0.892244 | 0.560888 | 0.193184 | 0.736966 | 0.662499 |
| P25685 | DnaJ homolog subfamily B member 1 (DNAJB1)                | 0.633607 | 0.580629 | 1.005857 | 0.499659 | 0.974107 | 0.833627 | 0.944618 | 1.026472 | 0.673337 | 0.923335 |
| P25686 | DnaJ homolog subfamily B member 2 (DNAJB2)                | 0.523035 | 0.655971 | -0.50669 | -0.2986  | -0.28615 | -0.62904 | -0.31369 | -0.60478 | -0.93546 | -1.00888 |
| P25705 | ATP synthase subunit F1A (ATP5F1A)                        | 0.63342  | 0.461935 | 0.649406 | 0.815636 | 0.584963 | 0.743494 | 0.984473 | 0.881451 | 0.624863 | 0.558442 |
| P25774 | Cathepsin S (CTSS)                                        | 0.883259 | 0.819558 | 0.220163 | -0.01894 | 0.28883  | 0.455452 | 0.761315 | 0.626346 | 0.254365 | -0.27191 |
| P25786 | Proteasome subunit alpha 1 (PSMA1)                        | 0.377468 | 0.379705 | 0.363373 | 0.273407 | 0.196272 | 0.471306 | 0.566461 | 0.616609 | 0.468861 | 0.592808 |
| P25787 | Proteasome subunit alpha 2 (PSMA2)                        | 0.596835 | 0.711529 | 0.314664 | 0.694794 | 0.137352 | 0.442796 | 0.700051 | 0.753779 | 0.410848 | 0.137493 |
| P25788 | Proteasome subunit alpha 3 (PSMA3)                        | 1.130362 | 1.381508 | 0.625886 | 0.551115 | 0.482236 | 0.603064 | 0.841959 | 0.519875 | 0.556304 | 0.844519 |
| P25789 | Proteasome subunit alpha 4 (PSMA4)                        | 0.021539 | 0.024094 | -0.75001 | -0.64943 | -0.13676 | 0.286175 | -0.09431 | -0.63723 | -0.45396 | -0.6836  |
| P26010 | Integrin beta 7 (ITGB7)                                   | -0.49394 | -0.75002 | -1.39183 | -1.52356 | -0.46036 | -1.27621 | -0.45305 | -0.45372 | -0.66493 | -0.26127 |
| P26038 | Moesin (MSN)                                              | 0.363894 | 0.585719 | 0.848689 | 0.7507   | 0.789283 | 0.676928 | 0.761291 | 0.709    | 0.983403 | 0.902396 |
| P26196 | Probable DNA double-strand break repair factor 2 (DDX6)   | 0.665413 | 0.299925 | 0.546341 | 0.204266 | 0.54711  | 0.415288 | 0.404284 | 0.476424 | 0.618185 | 0.66876  |
| P26358 | DNA methyltransferase 1 (DNMT1)                           | 0.171271 | 0.351262 | 0.068531 | 0.108706 | 0.28883  | 0.299902 | 0.195839 | 0.110183 | -0.30319 | -0.05871 |
| P26368 | Splicing factor 2A (U2AF2)                                | 0.076726 | 0.2824   | -0.62449 | -0.30633 | -0.02248 | -0.21785 | -0.63971 | -0.15073 | -0.65748 | -0.27191 |
| P26373 | 60S ribosomal protein L13 (RPL13)                         | 0.042577 | 0.021184 | 0.537397 | 1.031027 | 1.151631 | 0.652879 | 0.5115   | 0.607683 | 0.606586 | 1.069124 |
| P26440 | Isovaleryl-CoA dehydrogenase (IVD)                        | 1.148751 | 1.207241 | 0.884421 | 0.608561 | 0.671907 | 1.107854 | 1.055176 | 1.041697 | 0.074252 | -0.31969 |
| P26447 | Protein S100A4 (S100A4)                                   | 1.290851 | 1.379358 | 1.662003 | 1.71426  | 1.669214 | 0.817366 | 1.135161 | 1.071386 | 0.609891 | 0.80609  |
| P26583 | High mobility group B2 (HMGB2)                            | 0.357095 | 0.854481 | 0.711793 | 0.425973 | 1.137106 | 0.439422 | 0.286713 | 0.826851 | 0.689796 | 0.844603 |
| P26599 | Polypyrimidine tract-binding protein 1 (PTBP1)            | 0.067171 | -0.19599 | -1.13906 | -0.67557 | -0.79256 | -0.635   | 0.030374 | -1.35995 | 0.182637 | 0.207329 |

|        |                        |          |          |          |          |          |          |          |          |          |          |
|--------|------------------------|----------|----------|----------|----------|----------|----------|----------|----------|----------|----------|
| P26639 | Threonine- TARS1 TAR   | 0.82737  | 0.873722 | 0.938821 | 0.742372 | 0.232977 | -0.11366 | 1.092153 | 0.929611 | 1.273994 | 0.896825 |
| P26640 | Valine--tRN VARS1 G7A  | -0.18619 | -0.12763 | -0.36858 | -0.26706 | -0.37109 | -0.282   | -0.13206 | -0.29197 | -0.15938 | 0.319203 |
| P26641 | Elongation EEF1G EF1C  | 1.033632 | 1.053405 | 0.962212 | 0.943682 | 1.247857 | 1.057117 | 1.352969 | 1.370664 | 1.189446 | 1.21974  |
| P26842 | CD27 antig CD27 TNFR   | 0.127977 | 0.268473 | -0.65911 | -0.82612 | -0.69543 | -0.80627 | -0.49566 | -0.75672 | -0.5571  | -0.55437 |
| P26885 | Peptidyl-pr FKBP2 FKBI | -0.9706  | -0.91942 | -0.46855 | -0.86486 | -0.5943  | -0.81673 | -1.02387 | -0.96281 | -1.01962 | -0.89851 |
| P27105 | Stomatin (f STOM BND   | -0.10428 | -0.18122 | -0.67794 | -1.33778 | -1.91675 | -1.3767  | -0.26645 | -0.75039 | -2.15388 | -2.25505 |
| P27348 | 14-3-3 prot YWHAQ      | -0.41136 | 0.062066 | -0.11545 | -0.08535 | -0.521   | -0.33793 | -0.24033 | -0.26454 | -0.31452 | -0.50557 |
| P27361 | Mitogen-ac MAPK3 ERK   | 0.083382 | 0.189718 | 0.405256 | 0.309905 | 0.239016 | 0.217701 | 0.160674 | 0.375482 | 0.349069 | 0.636037 |
| P27449 | V-type prot ATP6VOC A  | -3.01988 | -2.92422 | -3.09968 | -1.92549 | -1.9828  | -1.51135 | -3.00149 | -1.30472 | -3.00349 | -2.46629 |
| P27635 | 60S ribosom RPL10 DXSI | 0.455348 | 0.172485 | -0.23467 | -0.34614 | -0.03464 | 0.272404 | 0.202064 | 0.118156 | -0.40498 | -0.16043 |
| P27694 | Replication RPA1 REPA  | 0.310954 | 0.228487 | -0.18709 | -0.20025 | 0.093574 | 0.268489 | 0.113114 | 0.212545 | -0.04307 | 0.047877 |
| P27695 | DNA-(apurin APEX1 APE  | 1.428658 | 1.468619 | 1.023091 | 1.162229 | 1.410951 | 1.123476 | 1.041404 | 0.960829 | 1.42702  | 1.486519 |
| P27707 | Deoxycytid DCK         | -0.39429 | -0.44756 | -0.58116 | -0.42228 | -0.77114 | -0.38595 | -0.74721 | -0.83107 | -0.70886 | -0.71429 |
| P27708 | CAD protei CAD         | -0.18057 | -0.08017 | -0.33662 | -0.32979 | -0.62263 | -0.38618 | -0.23326 | -0.43812 | -0.30945 | -0.39453 |
| P27797 | Calreticulin CALR CRTC | 1.306312 | 1.414353 | 1.208695 | 1.201634 | 0.783146 | 0.58512  | 0.989067 | 0.919413 | 0.682713 | 0.506559 |
| P27816 | Microtubul MAP4        | 0.966269 | 1.027039 | 0.968464 | 0.674146 | 0.503375 | 0.606658 | 0.692992 | 0.659345 | 0.600593 | 0.759796 |
| P27824 | Calnexin (IF CANX      | 1.229304 | 1.288798 | 0.687751 | 0.416605 | 0.405712 | 0.115031 | 1.029952 | 0.265894 | -0.35281 | -0.26829 |
| P27986 | Phosphatid PIK3R1 GRF  | -0.15455 | -0.09477 | -0.17253 | -0.2321  | -0.40658 | -0.1394  | 0.045324 | 0.237039 | -0.25955 | -0.30832 |
| P27987 | Inositol-tris ITPKB    | -0.96408 | -0.77649 | -0.63051 | -0.86839 | -0.40914 | -0.72247 | -0.75585 | -0.3994  | -0.30319 | -0.47489 |
| P28062 | Proteasom PSMB8 LM     | -0.09075 | -0.24267 | -1.04281 | -0.63008 | -0.69198 | -0.7104  | -0.52246 | -0.74036 | -0.31373 | -0.18213 |
| P28065 | Proteasom PSMB9 LM     | 1.152306 | 1.179425 | 0.140172 | 0.350669 | 0.276604 | 0.174774 | 0.527812 | 0.328261 | 0.442635 | 0.703535 |
| P28066 | Proteasom PSMA5        | 0.529469 | 0.489876 | 0.90116  | 0.453718 | 0.557857 | 1.279786 | 0.48631  | 0.842899 | 1.216318 | 1.202019 |
| P28070 | Proteasom PSMB4 PRC    | 1.138605 | 1.23017  | -0.19599 | 0.225972 | -0.05302 | 0.494765 | 0.758294 | 0.280108 | -0.06263 | 0.396106 |
| P28161 | Glutathion GSTM2 GST   | -0.94062 | -0.73048 | -1.53138 | -1.5787  | -1.12418 | -0.05004 | -0.74723 | -0.29078 | 0.540274 | 0.783129 |
| P28331 | NADH-ubiq NDUFS1       | 0.672857 | 0.738118 | 1.004431 | 0.918245 | 0.859519 | 0.753267 | 0.927025 | 0.872235 | 0.966614 | 0.9732   |
| P28340 | DNA polym POLD1 POL    | -0.41908 | -0.29776 | 0.049819 | 0.024875 | -0.06853 | -0.24998 | -0.378   | -0.52607 | -0.07251 | 0.131052 |
| P28482 | Mitogen-ac MAPK1 ERK   | 1.809218 | 1.810547 | 1.658443 | 1.299168 | 1.315967 | 1.273018 | 1.435988 | 1.5025   | 1.441317 | 1.385981 |
| P28715 | DNA repair ERCC5 ERC   | -1.59104 | -1.24598 | -1.58887 | -2.8011  | -1.47063 | -1.45943 | -1.46713 | -1.23581 | -1.31487 | -1.84093 |
| P28799 | Progranulir GRN        | -2.40048 | -1.87042 | -0.0039  | 0.334419 | -1.62902 | -1.19293 | -1.64539 | -1.70588 | 0.218346 | -0.08194 |
| P28838 | Cytosol am LAP3 LAPEF  | -0.27876 | -0.11762 | 0.256385 | 0.567888 | -0.00778 | 0.087606 | 0.337008 | 0.47014  | -0.4177  | -0.55767 |
| P28907 | ADP-ribosy CD38        | 0.234465 | 0.288798 | -0.40726 | -0.62632 | -0.04532 | 0.135515 | -0.15656 | -0.09464 | 0.549967 | 0.452172 |
| P29083 | General tra GTF2E1 TF  | -0.74392 | -0.81368 | -0.49187 | -0.79202 | -1.15402 | -0.9558  | -0.24361 | -0.20034 | -0.56799 | -1.28007 |
| P29084 | Transcriptio GTF2E2 TF | -1.38702 | -1.20945 | -1.12199 | -1.75803 | -1.31451 | -1.1989  | -1.31937 | -1.08246 | -0.67243 | -1.11032 |

|        |                         |          |          |           |          |          |          |          |          |          |          |
|--------|-------------------------|----------|----------|-----------|----------|----------|----------|----------|----------|----------|----------|
| P29144 | Tripeptidyl TPP2        | -0.08746 | -0.25526 | 0.072245  | -0.06413 | -0.1161  | 0.179608 | -0.12274 | -0.22689 | 0.397248 | 0.429349 |
| P29218 | Inositol mc IMPA1 IMP   | 0.04182  | -0.17823 | -0.28345  | -0.08394 | 0.342602 | 0.140481 | 0.239827 | 0.241889 | 0.453419 | 0.422761 |
| P29350 | Tyrosine-pr PTPN6 HCP   | 0.741807 | 1.079643 | 1.052896  | 1.15952  | 1.040332 | 1.214798 | 1.26559  | 1.192432 | 0.736966 | 0.76131  |
| P29353 | SHC-transfr SHC1 SHC S  | -1.26546 | -1.60064 | -1.75002  | -1.75803 | -1.42999 | -1.03317 | -2.03103 | -2.14439 | -1.78165 | -1.8893  |
| P29372 | DNA-3-met MPG AAG /     | 0.029787 | 0.05142  | -0.22475  | 0.029078 | -0.02298 | -0.1208  | -0.25691 | -0.33342 | 0.117652 | -0.22461 |
| P29374 | AT-rich intε ARID4A RB  | -2.80735 | -1.73697 | -1.10512  | -1.47045 | -0.71727 | -1       | -1.13955 | -0.848   | -1.21299 | -1.12956 |
| P29401 | Transketolε TKT         | 0.87564  | 1.021616 | -0.18709  | -0.12439 | -0.22487 | 0        | 0.51763  | 0.083416 | 0.130629 | 0.127005 |
| P29466 | Caspase-1   CASP1 IL1B  | 0.663437 | 0.656435 | 0.521496  | 0.276643 | 0.318845 | 0.341389 | 0.563478 | 0.384169 | 0.170519 | 0.070923 |
| P29590 | Protein PM PML MYL P    | -0.38923 | -0.35856 | 0.193132  | 0.055377 | -0.03471 | 0.016907 | 0.072532 | -0.01903 | 0.137608 | -0.02553 |
| P29692 | Elongation EEF1D EF1E   | -1.22992 | -0.78991 | -0.5656   | -0.50564 | -0.64576 | -1       | -0.9898  | -0.69188 | -0.8514  | -0.47836 |
| P29728 | 2'-5'-oligoa OAS2       | -3.19438 | -2.07195 | -1.66827  | -2.41884 | -2.6163  | -1.56875 | -1.74438 | -2.53139 | -2.71101 | -1.50198 |
| P30040 | Endoplasm ERP29 C12A    | -0.44409 | -0.60032 | 0.038657  | -0.06881 | -0.42688 | -0.28001 | -0.38332 | -0.36312 | -0.18921 | -0.3693  |
| P30041 | Peroxiredo PRDX6 AOF    | 0.338802 | 0.45446  | -0.58301  | -0.49011 | -0.51495 | -0.55435 | -0.38863 | -0.24257 | -0.01421 | -0.11276 |
| P30042 | Glutamine GATD3B HE     | 0.371969 | 0.600476 | 1.280796  | 1.160134 | 1.154975 | 1.465381 | 1.31166  | 1.571542 | 1.10953  | 0.898899 |
| P30043 | Flavin redu BLVRB FLR   | -0.19145 | -0.07713 | -8.43E-05 | -0.03338 | 0.152    | 0.224882 | 0.206722 | 0.042276 | -0.02544 | -0.15654 |
| P30044 | Peroxiredo PRDX5 ACR    | 1.528647 | 1.485154 | 1.624696  | 1.566896 | 1.733879 | 1.793936 | 1.647699 | 1.871683 | 1.987807 | 1.991757 |
| P30046 | D-dopachro DDT          | 0.212351 | 0.287479 | -0.13299  | 0.344842 | -0.08786 | 0.153122 | 0.206974 | 0.16977  | 0.29989  | 0.098527 |
| P30048 | Thioredoxi PRDX3 AOF    | 0.876672 | 0.881005 | 0.81247   | 0.78805  | 0.914051 | 0.93012  | 1.12858  | 1.061639 | 1.066793 | 0.761413 |
| P30049 | ATP syntha ATP5F1D A    | -0.44845 | -0.43878 | -1.00395  | -0.89204 | -1.02966 | -1.33758 | -0.82841 | -1.12091 | -0.90274 | -1.03132 |
| P30050 | 60S ribosor RPL12       | 0.719892 | 0.707023 | 0.800644  | 0.725603 | 0.59976  | 0.06413  | 0.729495 | 0.690489 | 0.952502 | 1.043781 |
| P30084 | Enoyl-CoA   ECHS1       | -0.09023 | 0.488929 | 0.551072  | 0.633724 | 0.785819 | 1.047135 | 0.82909  | 0.827093 | -0.06191 | -0.03068 |
| P30085 | UMP-CMP CMPK1 CM        | -0.12003 | -0.36146 | 0.219121  | -0.47874 | 0.47155  | 0.163444 | 0.149311 | 0.141064 | 0.494909 | 0.181694 |
| P30086 | Phosphatid PEBP1 PBP    | 0.440573 | 0.58756  | 0.186295  | 0.584963 | 0.014797 | 0.730393 | 0.364274 | 0.490326 | 0.455622 | 0.419547 |
| P30101 | Protein dis PDIA3 ERP5  | 0.382492 | 0.406301 | 0.852297  | 0.512062 | 0.258068 | 0.544321 | 0.336091 | 0.349122 | 0.509794 | 0.365517 |
| P30153 | Serine/thre PPP2R1A     | 0.720746 | 0.707098 | 0.695031  | 0.399183 | 0.603887 | 0.559232 | 0.68455  | 0.51056  | 0.609891 | 0.269657 |
| P30154 | Serine/thre PPP2R1B     | -0.71491 | -0.87317 | -1.45457  | -1       | -0.55552 | -0.90484 | -1.18536 | -0.54265 | -0.51592 | -0.54137 |
| P30203 | T-cell differ CD6       | -0.24377 | -0.2185  | 0.01165   | 0.25861  | 0.148    | -0.37906 | -0.13391 | -0.04102 | -0.39941 | 0.036126 |
| P30260 | Cell divisioi CDC27 ANK | -3.43539 | -3.32193 | -2.32193  | -3.75803 | NA       | NA       | NA       | NA       | -3.08746 | -3.44184 |
| P30405 | Peptidyl-pr PPIF CYP3   | -0.57289 | -0.54839 | -0.93147  | -0.56937 | -1.74193 | -0.46697 | -0.41163 | -0.12553 | -0.92647 | -0.73402 |
| P30414 | NK-tumor r NKTR         | -1.42659 | -0.63779 | -0.49693  | -0.58273 | -0.52345 | -0.67662 | -0.65248 | -0.68433 | -0.37082 | -0.2056  |
| P30419 | Glycylpepti NMT1 NM1    | -0.28444 | -0.09472 | -0.11231  | 0.202651 | 0.22623  | 0.166499 | 0.136858 | 0.19863  | -0.0677  | 0.049666 |
| P30464 | HLA class I HLA-B HLAI  | 0.12755  | -0.08844 | NA        | NA       | -0.75442 | -0.65208 | 1.235488 | 1.227291 | -0.90866 | -1.34873 |
| P30485 | HLA class I HLA-B HLAI  | -1.34023 | -1.42286 | 0.795405  | 0.440164 | 0.519084 | 0.892015 | 0.911042 | 0.598199 | -1.58496 | -1.93934 |

|        |                        |          |          |          |          |          |          |          |          |          |          |
|--------|------------------------|----------|----------|----------|----------|----------|----------|----------|----------|----------|----------|
| P30501 | HLA class I HLA-C HLA- | -2.14739 | -2.10375 | -0.52576 | -0.5787  | -1.44888 | -0.91009 | -1.5697  | -3.02308 | -1.76553 | -1.58054 |
| P30511 | HLA class I HLA-F HLA- | -0.6958  | -0.51975 | -0.75605 | -0.61837 | -2.10575 | -1.62334 | -0.03815 | -0.27005 | -1.21572 | -1.49788 |
| P30519 | Heme oxyg HMOX2 HC     | 1.614957 | 1.696234 | 0.730713 | 0.780219 | 1.033082 | 0.447459 | 0.817551 | 0.436348 | 0.600593 | 0.499895 |
| P30520 | Adenylosu ADSS2 ADS    | -0.03532 | -0.30256 | 0.307822 | 0.439912 | 0.121186 | 0.330645 | -0.06274 | 0.16506  | 0.193823 | 0.243729 |
| P30533 | Alpha-2-m LRPAP1 A2    | 0.809086 | 0.057333 | 1.842571 | 1.212502 | 0.843031 | 1.212994 | 0.888355 | 0.902303 | 0.375607 | 2.387674 |
| P30566 | Adenylosu ADSL AMP     | 0.055616 | 0.479748 | 0.463859 | 0.658648 | 0.675708 | 0.53804  | 0.591524 | 0.425441 | 0.576688 | 0.704712 |
| P30622 | CAP-Gly do CLIP1 CYLN  | -0.57521 | -0.62825 | -0.39932 | -0.71371 | -0.90981 | -0.64612 | -0.79082 | -0.62355 | -0.63936 | -0.49075 |
| P30626 | Sorcin (22 I SRI       | -0.91867 | -0.65841 | 0.525633 | 0.89331  | 0.537887 | 0.889549 | 0.951933 | 0.770655 | 0.983475 | 0.947659 |
| P30740 | Leukocyte SERPINB1 E   | 0.277894 | 0.242649 | 0.038574 | -0.14903 | 0.114333 | 0.004951 | 0.099581 | 0.131585 | 0.100901 | 0.235941 |
| P30837 | Aldehyde d ALDH1B1 A   | -1.12974 | -0.86785 | -0.29048 | -0.25932 | -1.92114 | -1.65782 | -0.32798 | -0.21049 | 0.600731 | 0.3161   |
| P30876 | DNA-direct POLR2B      | 0.08253  | 0.007777 | 0.112475 | 0.316635 | 0.342602 | 0.356384 | 0.274077 | 0.232173 | 0.297201 | 0.468255 |
| P31040 | Succinate c SDHA SDH   | 0.413514 | 0.44062  | 0.543576 | 0.323141 | 0.429231 | 0.375552 | 0.60661  | 0.553159 | 0.50357  | 0.362013 |
| P31146 | Coronin-1A CORO1A C    | 0.345639 | 0.612032 | 0.331765 | 0.131682 | 0.21374  | 0.333978 | 0.332041 | 0.273314 | 0.295485 | 0.469598 |
| P31150 | Rab GDP di GDI1 GDIL   | -0.99822 | -0.50612 | 0.23349  | 0        | 0.45537  | 0.189226 | -1.32379 | -1.25788 | -1.28586 | -0.9766  |
| P31153 | S-adenosyl MAT2A AM    | -0.17005 | 0.078434 | 0.027039 | 0.034064 | -0.1487  | 0.061512 | -0.01235 | 0.039389 | 0.079267 | 0.094215 |
| P31321 | cAMP-dep PRKAR1B       | -1.96486 | -1.18456 | -1.21086 | -1.435   | -0.73979 | -0.63685 | -1.04688 | -1.55228 | -0.64366 | -0.77672 |
| P31483 | Nucleolysir TIA1       | -1.73668 | -1.88178 | -1.81616 | -2.00575 | -1.53527 | -2.18727 | -1.97972 | -1.89514 | -0.98654 | -1.68713 |
| P31629 | Transcripti HIVEP2     | -0.6429  | -0.44196 | -0.63217 | -0.39855 | -0.53398 | -0.57094 | 0.122543 | -0.26303 | -0.55162 | -0.2691  |
| P31689 | DnaJ homo DNAJA1 DN    | -0.86139 | -0.90202 | -0.73048 | -0.90298 | -0.83173 | -0.81558 | -0.83577 | -0.69126 | -0.73897 | -0.52218 |
| P31751 | RAC-beta s AKT2        | -0.13986 | -0.31708 | -0.424   | -0.35487 | -0.42987 | -0.35078 | -0.36365 | -0.13154 | -0.08355 | -0.25826 |
| P31930 | Cytochrom UQCRC1       | 0.865558 | 0.750658 | 0.118866 | 0.347468 | 0.083358 | 0.599738 | 0.637346 | 0.637715 | 0.222477 | -0.03491 |
| P31937 | 3-hydroxyi HIBADH      | 0.371236 | 0.432556 | 0.8379   | 0.879145 | 0.700795 | 0.780513 | 0.859952 | 0.925201 | 1.382796 | 1.096057 |
| P31939 | Bifunctional ATIC PURH | 0.26     | 0.507538 | 0.179425 | -0.0906  | 0.239291 | 0.415037 | 0.218001 | 0.326501 | 0.285644 | 0.412823 |
| P31942 | Heterogen HNRNPH3 I    | -0.86139 | -1.2276  | -0.84115 | -0.82189 | -0.71989 | -0.83436 | -0.67195 | -1.14439 | -0.82033 | -0.63128 |
| P31943 | Heterogen HNRNPH1 I    | -1.01988 | -1.17673 | -0.67798 | -0.47303 | -0.54391 | -0.73108 | -0.57094 | -0.45965 | -0.58264 | -0.47847 |
| P31946 | 14-3-3 prot YWHAB      | -0.79575 | -0.80228 | -0.00152 | -0.10495 | 0.08652  | -0.50362 | 0.303965 | 0.16451  | 0.352187 | 0.2095   |
| P31948 | Stress-indu STIP1      | 1.073849 | 1.021288 | 1.231831 | 1.142803 | 1.15831  | 1.084889 | 1.060121 | 1.135606 | 1.323813 | 1.152314 |
| P31949 | Protein S1(S100A11 M   | 0.20847  | 0.114424 | 0.307822 | 0.314381 | -0.14048 | 0.048363 | 0.050273 | 0.217477 | -0.28011 | -0.3431  |
| P32119 | Peroxiredo PRDX2 NKE   | 1.189788 | 1.274528 | 1.215277 | 1.301136 | 1.138236 | 1.223063 | 1.198431 | 1.506461 | 1.585219 | 1.567687 |
| P32121 | Beta-arrest ARRB2 ARE  | 0.177567 | 0.138277 | -0.12894 | -0.45042 | -0.02119 | 0.137479 | 0.359484 | 0.083681 | -0.03807 | -0.05993 |
| P32249 | G-protein c GPR183 EB  | -1.666   | -1.6734  | 0.493758 | 0.439912 | 0.051139 | 0.443446 | 0.966357 | 0.839704 | -0.07748 | -0.09134 |
| P32455 | Guanylate- GBP1        | 0.14609  | 0.301509 | 0.687761 | 0.455859 | 0.244472 | 0.319659 | 0.446799 | 0.52654  | 0.51176  | 0.598171 |
| P32456 | Guanylate- GBP2        | 0.412803 | 0.585747 | 0.472001 | 0.483044 | 0.519028 | 0.282035 | 0.570511 | 0.427862 | 0.541784 | 0.465797 |

|        |                                       |          |          |          |          |          |          |          |          |          |          |
|--------|---------------------------------------|----------|----------|----------|----------|----------|----------|----------|----------|----------|----------|
| P32519 | ETS-related ELF1                      | -0.82571 | -0.73911 | -0.39193 | -0.66045 | -0.77055 | -0.73969 | -1.25666 | -1.29419 | -0.54078 | -0.79676 |
| P32780 | General transcription factor 2H1 BT   | 0.381307 | 0.068531 | 0.175978 | 0.288936 | 0.207442 | 0.19878  | 0.040358 | -0.37737 | 0.266174 | 0.008824 |
| P32942 | Intercellular adhesion molecule 3     | -0.411   | -0.37151 | -0.95395 | -1.00268 | -0.74193 | -1.03317 | -0.9255  | -1.1571  | -0.9445  | -1.11032 |
| P32969 | 60S ribosomal protein L9 OK/S         | 1.813383 | 2.17025  | 1.519827 | 1.591221 | 1.537078 | 1.612031 | 1.509705 | 1.207595 | 1.451696 | 1.952768 |
| P33176 | Kinesin-1 heavy chain KIF5B KNS1      | -0.47697 | -0.64874 | -0.18709 | -0.39428 | -0.37109 | -0.33703 | -0.60817 | -0.43812 | -0.20754 | -0.31838 |
| P33240 | Cleavage site CSTF2                   | -1.93427 | -1.65061 | -2.92088 | -2.7761  | -1.4555  | -1.42069 | -2.53999 | -2.73196 | -2.88946 | -2.43344 |
| P33241 | Lymphocyte specific protein 1 WP34    | 0.737845 | 0.904155 | 0.997049 | 0.826149 | 0.862297 | 0.745035 | 0.636667 | 0.985401 | 1.055495 | 1.010799 |
| P33316 | Deoxyuridine diphosphate              | -0.32122 | 0.158617 | -0.43062 | -0.41689 | -0.6574  | -1.02203 | -1.34566 | -1.33342 | -0.7028  | -0.62081 |
| P33527 | Multidrug resistance protein 1 MRI    | -1.13752 | -1.29755 | -0.67911 | -0.54408 | -0.19017 | -0.50499 | -1.00044 | -0.10418 | -0.50241 | -0.44251 |
| P33991 | DNA replication fork protein 4 CDC    | -0.91754 | -0.83094 | -1.06378 | -1.23078 | -0.90597 | -0.79845 | -0.21951 | -0.41891 | -1.1281  | -0.82517 |
| P33992 | DNA replication fork protein 5 CDC    | -0.34993 | -0.7632  | -0.63098 | -0.62285 | -1.17815 | -1.00091 | -0.98513 | -0.86569 | -0.87643 | -0.8478  |
| P33993 | DNA replication fork protein 7 CDC    | 0.313899 | 0.21283  | -0.53223 | -0.25199 | -1.18229 | -0.78597 | -0.21615 | -0.50373 | -0.71159 | -0.4475  |
| P34896 | Serine hydroxymethyltransferase 1     | -0.76553 | -0.7632  | -1.4761  | -0.52356 | -1.42999 | -1.42968 | -1.08427 | -3.80735 | -1.43721 | -1.21945 |
| P34897 | Serine hydroxymethyltransferase 2     | 0.013986 | 0.11614  | -0.74561 | -0.51907 | -0.87844 | -0.82721 | -0.37161 | -0.8867  | -0.77639 | -0.76306 |
| P34910 | Protein EVI1 EVI2B EVD1               | 0.137522 | 0.407776 | -0.31518 | -0.14699 | -0.70164 | -0.48602 | -0.2234  | -0.51543 | -0.54087 | -0.27588 |
| P34913 | Bifunctional protein 2 EPHX2          | -0.08104 | 0.123255 | -0.08844 | 0.006259 | -0.48097 | -0.74977 | -0.1452  | -0.52607 | -0.10764 | -0.38294 |
| P34932 | Heat shock protein 4 alpha APC        | 0.318341 | 0.409827 | 0.119559 | -0.02221 | 0.584963 | 0.3988   | 0.131912 | 0.289507 | 0.409429 | 0.531308 |
| P34947 | G protein-coupled receptor 5 GPRK     | -0.83954 | -1.23676 | -0.87317 | -1.52356 | -0.68105 | -0.47454 | -0.9898  | -1.27684 | -0.29739 | -0.69768 |
| P34949 | Mannose-6-phosphate isomerase 1       | 0.105182 | 0.256521 | -0.87317 | -0.73697 | -0.59991 | -0.30627 | -0.66382 | -0.28842 | -0.37038 | -0.11083 |
| P35080 | Profilin-2 (formin binding protein 2) | -3.39482 | -2.27402 | -2.76204 | -2.84831 | -2.4855  | -2.07167 | -3.11735 | -2.35867 | -2.03851 | -2.00373 |
| P35226 | Polycomb target protein 1 BMI1 PCGF   | -1.20832 | -0.91397 | -0.59533 | -0.92373 | -1.13946 | -0.59434 | -1.60248 | -0.51808 | -0.33259 | -0.73443 |
| P35232 | Prohibitin 1 PHB PHB1                 | 0.994272 | 1.238277 | 1.189716 | 1.157325 | 1.264273 | 1.251042 | 1.30797  | 1.375251 | 1.219133 | 1.152836 |
| P35236 | Tyrosine phosphatase PTPN7            | -0.04544 | -0.32803 | -0.43464 | -0.56629 | -0.46376 | 0.043673 | -0.53964 | -0.23922 | -0.31487 | -0.1322  |
| P35237 | Serpin B6 (serpinin B6 F)             | 0.314092 | 0.395091 | 0.460271 | 0.399183 | 0.465935 | 0.589685 | 0.652754 | 0.677227 | 0.487599 | 0.423075 |
| P35241 | Radixin RDX                           | -1.13993 | -0.68589 | -0.98449 | -0.75803 | -0.6574  | -1.06711 | -1.18536 | -0.37737 | -0.64268 | -0.45998 |
| P35244 | Replication protein A3 REPA           | 0.109091 | 0.419024 | -0.44282 | -0.20621 | 0.038047 | -0.2421  | 0.166748 | -0.00091 | 0.287151 | 0.465104 |
| P35249 | Replication factor 4                  | 0.018072 | -0.00782 | -0.42286 | -0.26806 | -0.26006 | -0.07285 | 0.074768 | 0.25634  | 0.100164 | -0.14906 |
| P35250 | Replication factor 2                  | -3.03684 | -2.03953 | -2.30256 | -3.14505 | -1.51245 | -2.79647 | -1.782   | -2.39232 | -3.08746 | -2.2402  |
| P35251 | Replication factor 1 RFC1             | -1.12017 | -1.0342  | -1.14168 | -1.12382 | -1.00377 | -1.07012 | -1.24795 | -1.76205 | -1.05369 | -1.05566 |
| P35268 | 60S ribosomal protein L22             | -0.55497 | -0.47069 | -0.81589 | -0.68562 | -1.05304 | -0.81558 | -1.20881 | -1.05842 | -0.96277 | -0.87685 |
| P35269 | General transcription factor 2F1 RA   | -0.38279 | -0.44048 | -0.35032 | -0.51469 | -0.54119 | -0.41928 | -0.69005 | -0.80653 | -0.61526 | -0.38374 |
| P35573 | Glycogen debranching enzyme GDE       | -0.04933 | 0.015513 | -0.30778 | -0.3851  | -0.1161  | -0.19265 | -0.17377 | -0.18584 | -0.05282 | 0.273324 |
| P35579 | Myosin-9 (formin binding protein 9)   | 0.299939 | 0.246804 | 0.615823 | 0.462849 | 0.572512 | 0.455402 | 0.500694 | 0.522566 | 0.725606 | 0.711674 |

|        |                                |          |          |          |          |          |          |          |          |          |          |
|--------|--------------------------------|----------|----------|----------|----------|----------|----------|----------|----------|----------|----------|
| P35580 | Myosin-10 MYH10                | -1.18057 | -1.43335 | -0.98449 | -0.56009 | -1.41009 | -0.94636 | -1.22069 | -1.04654 | -0.76553 | -0.51584 |
| P35606 | Coatomer COPB2                 | 0.155031 | 0.27275  | 0.064808 | -0.08394 | 0.226636 | 0.032421 | 0.257053 | 0.389042 | 0.277888 | 0.302324 |
| P35609 | Alpha-actin ACTN2              | 1.582941 | 1.60817  | 1.717732 | 1.697542 | 1.054723 | 1.208271 | 1.473317 | 1.434231 | 0.773279 | 0.803557 |
| P35610 | Sterol O-ac SOAT1 ACA          | 1.856726 | 2.074098 | 1.682938 | 1.867037 | 1.96233  | 1.647349 | 1.833428 | 1.81551  | 1.416804 | 1.370661 |
| P35611 | Alpha-adduct ADD1 ADD1         | 0.118066 | 0.045395 | -0.21366 | -0.05759 | -0.26031 | -0.20769 | -0.54709 | -0.14306 | 0.06454  | 0.368948 |
| P35613 | Basigin (5F BSG UNQ6)          | -3.89482 | -1.84488 | -0.63051 | -0.13813 | -0.13231 | -0.18021 | 0.055206 | -0.05247 | -0.78165 | -0.50324 |
| P35637 | RNA-binding FUS TLS            | -0.07464 | 0.27919  | -0.1936  | -0.12092 | -0.02603 | 0.263945 | -0.03485 | 0.115477 | 0.173871 | 0.228098 |
| P35658 | Nuclear pore NUP214 CA         | 0.217786 | 0.441118 | 0.3046   | 0.157794 | 0.503995 | 0.273111 | 0.175831 | 0.267566 | 0.144753 | -0.12959 |
| P35659 | Protein DEID EK                | 0.661904 | 0.317903 | 0.609532 | 0.329436 | 0.274789 | 0.122607 | 0.336182 | 0.26362  | 0.105681 | 0.480081 |
| P35749 | Myosin-11 MYH11 KIA            | -0.37912 | -0.85896 | -0.10512 | -0.95067 | -0.35199 | -0.28284 | -0.58496 | -0.74846 | -0.24058 | -0.44184 |
| P35754 | Glutaredox GLRX GRX            | 0.440212 | 0.462729 | -0.32126 | 0.102633 | -0.16024 | -0.21134 | -0.10602 | -0.16414 | 0.229412 | 0.123717 |
| P35813 | Protein phosphatase PPM1A PPF  | 0.116409 | -0.69849 | -0.34651 | 0.085247 | -0.02248 | -0.37197 | -0.48134 | -0.95491 | 0.023383 | -0.28264 |
| P35914 | Hydroxymethyl HMGCL            | -0.92411 | -0.7393  | -0.48288 | -0.50049 | -0.24392 | 0.093714 | -0.4449  | -0.58531 | -0.96243 | -1.24711 |
| P35998 | 26S proteasome PSMC2 MS        | -0.0559  | 0.176306 | -0.28512 | -0.26952 | -0.28789 | -0.26527 | -0.28938 | -0.46908 | -0.336   | -0.20147 |
| P36402 | Transcription factor TCF7 TCF1 | -1.46855 | -0.78319 | -0.55984 | -0.65567 | -0.13231 | -0.28951 | -0.58496 | -0.86876 | 0        | 0.228701 |
| P36405 | ADP-ribosylation ARL3 ARFL     | -0.23848 | 0.062527 | 0.213225 | 0.616881 | 0.550978 | 0.447926 | 0.371286 | 0.255695 | -0.07871 | 0.249688 |
| P36507 | Dual specific MAP2K2 M         | 0.719892 | 0.804009 | 1.288798 | 0.765535 | 0.903913 | 0.727095 | 0.500481 | 0.474661 | 0.462844 | 0.244097 |
| P36542 | ATP synthase ATP5F1C A         | 0.794625 | 0.889593 | 0.040968 | 0.480992 | 0.509829 | 1.079334 | 1.100329 | 0.978795 | 0.037637 | -0.2602  |
| P36543 | V-type proton ATP6V1E1         | -0.02445 | -0.04354 | 0.622904 | 0.402437 | 0.609541 | 0.33931  | 0.274077 | 0.261125 | 0.643479 | 0.815026 |
| P36551 | Oxygen-dependent CPOX CPO      | 0.86007  | 0.968464 | 0.491285 | 0.445169 | 0.27497  | 0.745617 | 0.508575 | 0.613209 | 0.456056 | 0.170908 |
| P36578 | 60S ribosomal RPL4 RPL1        | 1.368131 | 1.426713 | 1.207667 | 0.834466 | 1.399608 | 1.324112 | 1.022479 | 1.34915  | 1.404274 | 1.449638 |
| P36639 | 7,8-dihydroxy NUDT1 MT         | -1.40537 | -0.64352 | -1.20144 | -0.57237 | -1.20515 | -1.00017 | -0.58996 | -0.56774 | -0.89252 | -1.00003 |
| P36776 | Lon protease LONP1 PRS         | 0.816429 | 0.652435 | -0.00209 | -0.152   | -0.34722 | 0.395433 | 0.301693 | 0.120771 | -0.12844 | -0.0406  |
| P36871 | Phosphoglucomutase PGM1        | 0.234465 | 0.395882 | -0.20881 | -0.14156 | -0.42999 | -0.26303 | -0.22004 | -0.33342 | -0.26303 | -0.18886 |
| P36873 | Serine/threonine PPP1CC        | 0.055309 | 0.178257 | 0.185418 | 0.231612 | -0.08127 | 0.094364 | 0.065954 | 0.018097 | 0.279172 | 0.123831 |
| P36915 | Guanine nucleotide GNL1 HSR1   | 0.925841 | 0.90004  | 0.697437 | 0.467393 | 0.809478 | 0.743508 | 0.811733 | 0.698677 | 0.480704 | 0.372371 |
| P36954 | DNA-directed POLR2I            | -0.89152 | -0.5008  | -0.41278 | -0.40044 | -0.8108  | -0.50499 | -0.2549  | -0.24492 | 0.030818 | -0.09308 |
| P36957 | Dihydrolipoyl DLST DLTS        | -0.93403 | -1.14014 | -0.01963 | -0.41086 | -0.61488 | -0.29626 | -1.11293 | -0.97728 | -0.55349 | -1.14403 |
| P36969 | Phospholipase GPX4             | 0.798669 | 1.0925   | 0.625965 | 0.626185 | 0.306978 | 0.871485 | 0.546949 | 0.554102 | 0.312468 | 0.251185 |
| P37108 | Signal receptor SRP14          | -0.3347  | -0.22584 | 0.038399 | -0.34356 | -0.00777 | 0.260715 | 0.209313 | -0.02338 | -0.01671 | 0.118463 |
| P37173 | TGF-beta receptor TGFBR2       | -3.30986 | -1.36146 | -1.44392 | -1.67557 | -1.45017 | -1.26303 | -0.6477  | -0.39985 | -0.55003 | -0.88112 |
| P37198 | Nuclear pore NUP62             | -0.97615 | -0.46825 | -0.59474 | -0.38606 | -0.47063 | -0.77761 | -0.95964 | -0.50967 | -0.23502 | -0.42392 |
| P37802 | Transgelin- TAGLN2 KIA         | -0.81545 | -0.79387 | 1.248338 | 1.061401 | 0.899933 | 1.142958 | 0.791186 | 1.36257  | 0.500835 | 0.798477 |

|        |                                                      |          |          |          |          |          |          |          |          |          |          |
|--------|------------------------------------------------------|----------|----------|----------|----------|----------|----------|----------|----------|----------|----------|
| P37837 | Transaldolase TALDO1 TA                              | 0.998944 | 1.069543 | 0.946712 | 1.148852 | 1.389133 | 1.324665 | 1.438055 | 1.500596 | 1.537498 | 1.69026  |
| P38117 | Electron transport chain component ETFB FP58E        | 0.535635 | 0.53123  | 0.657741 | 0.580195 | 0.408533 | 0.569904 | 0.704171 | 0.48811  | 0.563758 | 0.639184 |
| P38159 | RNA-binding protein RBMX HNR                         | 0.705095 | 0.767827 | -1.13017 | -1.937   | -0.09212 | -0.58496 | -1.09404 | -0.90344 | -1.22224 | -0.86307 |
| P38432 | Coilin (p80) COIL CLN8C                              | -3.80735 | -4.72403 | -4.36146 | -3.9386  | -3.59991 | -4.34395 | NA       | NA       | -4.3505  | -4.0268  |
| P38606 | V-type proton ATPase V1A A                           | 0.514573 | 0.767827 | 0.858787 | 0.635342 | 0.778191 | 0.787235 | 0.955846 | 0.861924 | 0.871858 | 0.540619 |
| P38646 | Stress-70 protein HSPA9 GRP                          | 0.051549 | -0.0552  | 0.291986 | 0.176878 | -0.06075 | -0.05858 | 0.035374 | 0.017639 | 0.110496 | 0.043589 |
| P38919 | Eukaryotic translation initiation factor EIF4A3 DD)  | 1.028693 | 1.070866 | 0.450754 | 0.632403 | 0.31009  | 0.430758 | 0.760848 | 0.705309 | 0.439424 | 0.298081 |
| P38935 | DNA-binding protein IGHMBP2 S                        | -2.21002 | -1.70378 | -1.45231 | -1.19161 | -1.12921 | -1.25633 | -1.07616 | -1.31238 | -1.31292 | -1.51263 |
| P39019 | 40S ribosomal protein RPS19                          | 1.566662 | 1.716546 | 1.31177  | 1.225277 | 1.361225 | 1.423945 | 1.566924 | 1.482424 | 1.664123 | 1.725237 |
| P39023 | 60S ribosomal protein RPL3 OK/S)                     | 1.474168 | 1.337591 | 1.377943 | 1.366398 | 1.537078 | 1.471818 | 1.51797  | 1.344535 | 1.38426  | 1.371003 |
| P39656 | Dolichyl-diphosphate synthase DDOST KIAA             | -1.38702 | -1.57719 | -2.32193 | -1.14505 | -1.74193 | -1.28951 | -1.45988 | -0.98583 | -1.92985 | -1.24157 |
| P39687 | Acidic leucine zipper protein ANP32A C1              | 0.737129 | 0.881495 | 1.369486 | 1.119379 | 1.118085 | 1.093332 | 1.126429 | 1.091121 | 1.390008 | 1.290742 |
| P39748 | Flap endonuclease FEN1 RAD2                          | 0.316477 | 0.407882 | 0.503406 | 0.235588 | -0.00512 | 0.380003 | 0.641167 | 0.557471 | -0.13686 | 0.282035 |
| P39880 | Homeobox protein CUX1 CUTL                           | -1.07464 | -1.96153 | -1.32193 | -1.27563 | -1.2076  | -0.98911 | -0.87404 | -0.76362 | -0.95361 | -1       |
| P40121 | Macrophage chaperone CAPG AFCP                       | 0.556246 | 0.572569 | 1.484034 | 1.3186   | 1.411314 | 1.308753 | 1.564352 | 1.588774 | 1.254587 | 1.088123 |
| P40189 | Interleukin-6 IL6ST                                  | -1.60942 | -1.4021  | -1.45457 | -1.20163 | -2.69302 | -1.27621 | -1.46713 | -1.65535 | -1.39941 | -1.37145 |
| P40222 | Alpha-taxilin A TXLNA TXLI                           | -0.70277 | -0.58887 | -0.7112  | -0.9386  | -0.58869 | -0.56866 | -0.81223 | -0.87925 | -0.7028  | -0.82517 |
| P40227 | T-complex component CCT6A CCT                        | 0.808357 | 0.722601 | 0.925575 | 0.946632 | 1.034888 | 0.746769 | 0.800085 | 0.939503 | 1.171954 | 0.9922   |
| P40306 | Proteasome subunit PSMB10 LM                         | -0.05561 | 0.552592 | 0.612326 | 0.055377 | 0.744909 | 0.459367 | 0.089267 | 0.515732 | 0.858429 | 0.524716 |
| P40429 | 60S ribosomal protein RPL13A                         | 0.224123 | 0.513013 | 0.932354 | 0.692542 | 0.801951 | 0.951317 | 1.023183 | 0.755675 | 0.784897 | 1.129535 |
| P40763 | Signal transducer STAT3 APR                          | -0.05706 | 0.320296 | 0.045433 | 0.021594 | -0.00051 | -0.09465 | 0.170274 | 0.073734 | -0.00163 | -0.17687 |
| P40818 | Ubiquitin carboxyl-terminal hydrolase USP8 KIAA      | 0.105006 | 0.257086 | -0.07498 | 0.249953 | -0.05651 | 0.134519 | 0.233135 | 0.052139 | -0.22669 | -0.17866 |
| P40855 | Peroxisomal protein PEX19 HK3                        | -0.54681 | -0.15586 | 0.135103 | -0.08042 | 0.188122 | -0.0436  | -0.2701  | -0.06457 | 0.248764 | 0.140221 |
| P40925 | Malate dehydrogenase MDH1 MDI                        | 0.41515  | 0.758637 | 0.748705 | 0.779587 | 0.855054 | 0.820823 | 0.727307 | 0.716143 | 0.927835 | 0.943646 |
| P40926 | Malate dehydrogenase MDH2                            | 0.684487 | 0.864178 | 0.735532 | 0.789033 | 0.529039 | 0.552311 | 0.906378 | 0.914501 | 0.796691 | 0.445117 |
| P40937 | Replication factor RFC5                              | -2.23668 | -1.41878 | -1.31407 | -0.80292 | -1.17404 | -0.85868 | -1.11697 | -1.09812 | -1.79017 | -1.63128 |
| P40938 | Replication factor RFC3                              | -1.60516 | -1.72495 | -1.98204 | -1.7475  | -2.04057 | -1.07167 | -1.09491 | -1.29455 | -1.34608 | -1.29131 |
| P40939 | Trifunctional protein HADHA HA                       | 0.239609 | 0.369485 | 0.69262  | 0.430634 | 0.306978 | 0.373458 | 0.445411 | 0.303491 | 0.379237 | 0.202019 |
| P41091 | Eukaryotic translation initiation factor EIF2S3 EIF2 | 0.41834  | 0.506446 | 0.468579 | 0.397684 | 0.177448 | 0.330304 | 0.514569 | 0.371683 | 0.565554 | 0.513842 |
| P41208 | Centrin-2 (CETN2 CAL                                 | 0.396482 | 0.462593 | -0.79807 | -0.51199 | -0.0826  | 0.429117 | -0.04883 | 0.054343 | -0.4718  | -0.54392 |
| P41212 | Transcription factor ETV6 TEL T                      | -1.40296 | -1.17383 | -1       | -0.75803 | -1.71727 | -1.16175 | -1.30666 | -1.58496 | -1.68753 | -1.50324 |
| P41214 | Eukaryotic translation initiation factor EIF2D HCA   | 0.553443 | 0.598465 | 0.141044 | 0.480939 | 0.498119 | 0.313158 | 0.677251 | 0.637453 | 0.453419 | 0.496762 |
| P41218 | Myeloid cell nuclear differentiation antigen MNDA    | 0.727234 | 0.704633 | -0.60657 | -0.42764 | -0.40024 | -0.2962  | 0.71843  | 0.265894 | -0.64268 | -0.37718 |

|        |                         |          |          |          |          |          |          |          |          |          |          |
|--------|-------------------------|----------|----------|----------|----------|----------|----------|----------|----------|----------|----------|
| P41223 | Protein BU BUD31 EDC    | -0.40754 | -0.16129 | -0.05638 | -0.05991 | 0.041378 | -0.20262 | -0.45305 | -0.40742 | -0.4119  | -0.30433 |
| P41226 | Ubiquitin-li UBA7 UBE1  | -0.97305 | -0.68048 | -0.24632 | -0.3159  | -1.53046 | -0.73901 | -0.64455 | -0.83585 | -0.40798 | -0.36914 |
| P41227 | N-alpha-ac NAA10 ARI    | -0.3693  | -0.39696 | -0.26929 | -0.60709 | -0.33313 | -0.02203 | -0.33865 | -0.17638 | -0.55003 | -0.19898 |
| P41236 | Protein pho PPP1R2 IPF  | -0.90967 | -0.99813 | -1.06181 | -1.5029  | -0.88212 | -1.11225 | -1.21416 | -0.92269 | -0.56304 | -0.75068 |
| P41240 | Tyrosine-pr CSK         | 0.082462 | 0.150989 | 0.304669 | 0.288936 | 0.031923 | 0.29366  | 0.349798 | 0.157146 | -0.07269 | 0.000733 |
| P41250 | Glycine--tr GARS1 GAF   | 0.694203 | 0.729862 | 0.52661  | 0.806659 | 0.312976 | 0.479168 | 0.6019   | 0.623533 | 0.944    | 0.611274 |
| P41252 | Isoleucine- IARS1 IARS  | 0.70221  | 0.534708 | 0.216811 | 0.422588 | 0.507664 | 0.730393 | 0.605282 | 0.506536 | 0.830075 | 0.518551 |
| P41567 | Eukaryotic EIF1 SUI1    | -0.73245 | -1.10273 | -0.12275 | 0.091568 | 0.081539 | 0.026979 | -0.43274 | -0.1653  | 0.062502 | -0.09242 |
| P42025 | Beta-centr ACTR1B CT    | -0.48458 | -0.73697 | -0.70008 | -0.43837 | -0.81831 | -0.39008 | -0.46007 | -0.73079 | -0.23    | -0.18103 |
| P42126 | Enoyl-CoA ECI1 DCI      | 2.003028 | 2.295167 | 0.92805  | 0.801968 | 1.054723 | 1.548063 | 1.465928 | 1.154577 | 1.289507 | 0.803557 |
| P42166 | Lamina-ass TMPO LAP2    | -1.28011 | -1.02359 | -0.57138 | -0.68965 | -1.01495 | -0.9783  | -1.06274 | -0.94828 | -0.68701 | -0.4841  |
| P42167 | Lamina-ass TMPO LAP2    | 0.335226 | 0.411205 | 0.182864 | 0.076323 | 0.200987 | 0.335978 | 0.657873 | 0.308122 | 0.193711 | 0.442305 |
| P42224 | Signal trans STAT1      | 1.203205 | 1.251514 | 1.171156 | 1.364023 | 0.377945 | 0.746769 | 1.149793 | 1.123382 | 1.160898 | 1.125989 |
| P42226 | Signal trans STAT6      | -1.49255 | -1.25385 | -1.40801 | -1.55113 | -1.66127 | -1.33107 | -1.23447 | -1.63184 | -1.40295 | -1.48026 |
| P42229 | Signal trans STAT5A ST/ | 0.686383 | 0.523901 | -0.51457 | 0.108706 | -0.36151 | -0.15565 | 0.103623 | -0.02308 | -0.2916  | -0.50952 |
| P42285 | Exosome R MTREX DO      | 0.207716 | 0.221699 | 0.424524 | 0.133325 | 0.270702 | 0.403973 | 0.275987 | 0.041105 | 0.386842 | 0.353747 |
| P42331 | Rho GTPase ARHGAP25     | 0.287215 | 0.564016 | 0.4859   | 0.394258 | 0.345908 | 0.528709 | 0.450597 | 0.200086 | 0.063835 | 0.0859   |
| P42338 | Phosphatid PIK3CB PIK   | -0.97595 | -1.53138 | -1.11353 | -1.10402 | -0.89947 | -0.85457 | -1.04152 | -1.2091  | -0.83954 | -0.8893  |
| P42345 | Serine/thre MTOR FRAI   | -0.83429 | -1.02673 | -0.89314 | -0.58949 | -0.8099  | -0.62787 | -0.86328 | -0.68129 | -0.5677  | -0.31408 |
| P42566 | Epidermal j EPS15 AF1f  | -0.41181 | -0.48061 | -0.26348 | -0.29598 | -0.71981 | -0.81337 | -0.66953 | -0.39691 | -0.69614 | -0.31531 |
| P42574 | Caspase-3 ( CASP3 CPP   | -0.18367 | -0.16313 | -0.92128 | -0.96098 | -0.70647 | -0.25474 | -0.93137 | -0.96063 | -0.43701 | -0.87081 |
| P42575 | Caspase-2 ( CASP2 ICH1  | -0.00838 | 0.094575 | 0.586505 | 0.936849 | 0.238784 | 0.63588  | 0.543209 | 0.157844 | 0.077033 | 0.310728 |
| P42677 | 40S ribosor RPS27 MPS   | 1.371969 | 1.60689  | 1.682938 | 0.9874   | 1.327865 | 1.459432 | 1.456638 | 1.380272 | 1.628309 | 1.256751 |
| P42679 | Megakaryo MATK CTK      | -1.55036 | -1.38955 | -1.061   | -2.10459 | -1.0832  | -2.08088 | -2.03422 | -1.89719 | -0.86507 | -0.93934 |
| P42696 | RNA-bindin RBM34 KIA    | -0.9112  | -0.80386 | -1.23676 | -1.56009 | -1       | -1.26303 | -1.11718 | -1.1193  | -1.01898 | -0.82517 |
| P42704 | Leucine-ric LRPPRC LRI  | 0.584963 | 0.608419 | -0.09095 | -0.13525 | -0.26105 | -0.07183 | 0.051844 | -0.23321 | -0.20228 | -0.50204 |
| P42765 | 3-ketoacyl- ACAA2       | 0.228784 | 0.368334 | -0.13607 | -0.42389 | -0.30977 | -0.17522 | -0.23952 | -0.17297 | -0.23779 | -0.27735 |
| P42766 | 60S ribosor RPL35       | 0.452614 | 0.286472 | 0.453516 | 0.321679 | 0.368486 | 0.436033 | 0.210411 | 0.395415 | -0.01533 | 0.434495 |
| P42768 | Wiskott-Alr WAS IMD2    | -0.0525  | -0.03886 | -0.27363 | -0.40255 | -0.9286  | -0.48817 | -0.25691 | -0.60985 | -0.32879 | -0.2301  |
| P42858 | Huntingtin HTT HD IT1   | -1.18057 | -1.03953 | -0.83094 | -0.7794  | -0.22487 | -0.55254 | -1.22069 | -0.96605 | -0.97199 | -0.90578 |
| P43034 | Platelet-act PAFAH1B1   | -0.24578 | 0.045708 | -0.52491 | -0.51732 | -0.73164 | -0.30726 | -0.54071 | -0.59733 | -0.1786  | -0.1738  |
| P43116 | Prostaglan PTGER2       | -2.57289 | -2.10512 | -2.05565 | -1.48794 | -3.89947 | -1.93587 | -2.03103 | -2.97728 | NA       | NA       |
| P43243 | Matrin-3 MATR3 KIA      | 0.4975   | 0.655382 | 0.516873 | 0.277212 | 0.871762 | 0.635086 | 0.705939 | 0.73163  | 0.583369 | 0.645109 |



|        |                                            |          |          |          |          |          |          |          |          |          |          |
|--------|--------------------------------------------|----------|----------|----------|----------|----------|----------|----------|----------|----------|----------|
| P43246 | DNA mism: MSH2                             | 0.610097 | 0.552765 | 0.694419 | 0.800122 | 0.15819  | 0.330664 | 0.067072 | -0.156   | -0.17623 | -0.09337 |
| P43250 | G protein-c GRK6 GPRK                      | -0.46673 | -0.48285 | -0.77535 | -0.26508 | -0.12313 | -0.15586 | -0.45388 | -0.3939  | -0.73795 | -1.08977 |
| P43304 | Glycerol-3- GPD2                           | -1.46673 | -1.11067 | -1.17242 | -1.06278 | -0.77195 | -0.68435 | -0.98209 | -1.13011 | -1.69221 | -1.72714 |
| P43307 | Translocon SSR1 TRAP                       | 0.331874 | 0.540004 | -1.06465 | -0.92618 | -1.44745 | -0.98659 | -0.63814 | -1.53434 | -2.32221 | -1.89896 |
| P43403 | Tyrosine-phosphatase ZAP70 SRK             | -0.04482 | -0.01864 | 0.162105 | -0.30035 | -0.84527 | -0.41511 | -0.01518 | -0.04417 | -0.69727 | -0.3832  |
| P43487 | Ran-specific GTPase RANBP1                 | 0.850404 | 1.059672 | 0.723647 | 0.61137  | 0.742694 | 0.570316 | 0.692839 | 0.626346 | 1.014075 | 0.977701 |
| P43490 | Nicotinamide NADPH oxidase NAMPT PBL       | 0.286836 | 0.284102 | 0.061177 | 0.252734 | 0.151182 | 0.177175 | 0.326637 | 0.221716 | 0.190163 | 0.359473 |
| P43686 | 26S proteasome PSMC4 MIF                   | 0.598947 | 0.577207 | 0.925817 | 0.706154 | 0.888884 | 1.036388 | 0.690035 | 0.804452 | 0.978668 | 0.90182  |
| P43897 | Elongation factor TEFM                     | 0.005607 | -0.04994 | 0.497871 | 0.781406 | -0.21118 | 0.055442 | 0.001658 | -0.17393 | -0.32915 | -0.50899 |
| P45880 | Voltage-dependent VDAC2                    | 0.607387 | 0.542921 | -0.06592 | 0.333561 | -0.60726 | 0.404688 | 0.432931 | 0.223142 | -0.51977 | -0.64829 |
| P45954 | Short/branched ACADSB                      | 0.929157 | 0.780102 | 0.820945 | 0.912002 | 0.614864 | 1.091383 | 1.064166 | 1.020559 | 0.848511 | 0.560263 |
| P45973 | Chromobodies CBX5 HP1A                     | 0.339502 | 0.258667 | 0.163191 | 0.361423 | 0.479155 | 0.613747 | 0.362726 | 0.167054 | 0.850604 | 0.684248 |
| P45974 | Ubiquitin-conjugating enzyme USP5 ISOT     | 0.25443  | 0.509365 | 0.729582 | 0.783024 | 0.709079 | 0.831551 | 0.592869 | 0.557995 | 0.691198 | 0.694291 |
| P45984 | Mitogen-activated protein kinase MAPK9 JNK | -0.71491 | -0.72403 | -0.53703 | -0.82312 | -0.91341 | -0.27621 | -0.38466 | -0.62855 | -0.44361 | -0.41799 |
| P45985 | Dual-specific MAP2K4 JNK                   | -1.04933 | -1.57719 | -0.93892 | -1.2909  | -1.2076  | -0.90484 | -1.11718 | -1.26303 | -1.33852 | -0.8893  |
| P46019 | Phosphorylated PHKA2 PHK                   | -1.22684 | -0.90979 | -0.9145  | -0.60629 | -1.04174 | -0.49771 | -0.7467  | -0.92212 | -0.74512 | -0.7453  |
| P46060 | Ran GTPase RANGAP1                         | -0.30986 | -0.53703 | -0.34156 | -0.36167 | -0.56649 | -0.21785 | -0.52484 | -0.64636 | -0.39941 | -0.63329 |
| P46063 | ATP-dependent RECQL REC                    | 0.5752   | 0.660911 | 0.178837 | 0.182416 | 0.152    | 0.095157 | 0.234309 | 0.272104 | -0.01421 | 0.102654 |
| P46087 | Probable DNA topoisomerase 2: NOP2 NOL     | -0.68536 | -0.20043 | -0.15507 | -0.51711 | 0.133667 | -0.06659 | -0.14904 | -0.37737 | -0.74169 | -0.69768 |
| P46100 | Transcription factor ATRX RAD5             | -0.5025  | -0.6672  | -1.36146 | -1       | -0.92749 | -0.57679 | -0.75298 | -0.6605  | -0.74227 | -0.80202 |
| P46109 | Crk-like protein CRKL                      | -0.39345 | -0.27264 | -0.31829 | -0.19075 | -0.34884 | -0.2871  | -0.24048 | -0.08989 | -0.22017 | -0.05224 |
| P46199 | Translation factor MTIF2                   | -1.6696  | -2.05574 | -1.91787 | -1.63815 | -1.7275  | -1.20553 | -1.96023 | -1.11375 | -1.21084 | -1.35893 |
| P46379 | Large protein BAG6 BAT3                    | -0.42763 | -0.1315  | -0.18648 | -0.01701 | -0.31391 | -0.27718 | -0.23546 | -0.39946 | -0.34684 | -0.34337 |
| P46459 | Vesicle-fusion NSF                         | -0.22239 | -0.19153 | 0.351262 | -0.18728 | -0.02248 | -0.04439 | -0.06809 | 0.050626 | -0.11273 | -0.05365 |
| P46527 | Cyclin-dependent kinase CDKN1B KII         | -0.14662 | -0.1766  | -0.51577 | -0.34413 | -0.21732 | -0.53767 | 0.001341 | -0.43039 | -0.35193 | -0.10555 |
| P46734 | Dual-specific MAP2K3 M                     | -1.12318 | -0.78687 | -0.97679 | -1.3377  | -1.87199 | -1.26303 | -0.94973 | -1.10692 | -1.14886 | -1.45391 |
| P46736 | Lys-63-specific BRCC3 BRC                  | 0.388685 | 0.358299 | 0.094997 | -0.0024  | 0.099125 | 0.002418 | 0.044727 | -0.11388 | 0.034917 | 0.245682 |
| P46776 | 60S ribosomal RPL27A                       | -0.19162 | 0.008845 | 0.694693 | 0.879024 | 0.875821 | 0.991779 | 1.374176 | 0.61891  | 0.900813 | 0.937233 |
| P46777 | 60S ribosomal RPL5 MSTP                    | 0.667425 | 0.655971 | 0.939188 | 0.261081 | 1.002535 | 0.737733 | 0.966495 | 0.911001 | 1.175074 | 1.010772 |
| P46778 | 60S ribosomal RPL21                        | 0.640232 | 1.032768 | 1.567966 | 0.783867 | 1.470989 | 1.249495 | 1.303863 | 0.914504 | 1.423851 | 1.295128 |
| P46779 | 60S ribosomal RPL28                        | 0.727811 | 0.492537 | 0.223205 | 0.315813 | 0.903912 | 0.645222 | 0.434897 | 0.347272 | 0.259004 | 0.115693 |
| P46781 | 40S ribosomal RPS9                         | 1.839892 | 1.904289 | -0.01175 | 0.220599 | 0.549834 | 0.053638 | 0.62532  | 0.565752 | 0.082462 | -0.05411 |
| P46782 | 40S ribosomal RPS5                         | 0.418065 | 0.843658 | 0.735405 | -0.00629 | 0.411314 | 0.459432 | 0.62532  | 0.603921 | 0.751041 | 0.87044  |

|        |                        |          |          |          |          |          |          |          |          |          |          |
|--------|------------------------|----------|----------|----------|----------|----------|----------|----------|----------|----------|----------|
| P46783 | 40S ribosor RPS10      | 0.831689 | 0.632559 | 0.692533 | 0.634086 | 0.480787 | 0.826952 | 0.989143 | 0.828945 | 0.498427 | 0.433823 |
| P46926 | Glucosamir GNPDA1 GI   | 0.453374 | 0.91845  | -0.60639 | -0.27984 | -0.43754 | -0.13869 | -0.02467 | -0.4273  | 0.212298 | 0.154144 |
| P46939 | Utrophin (L UTRN DMC   | -2.74106 | -1.7112  | -0.98449 | -1.35364 | -1.64647 | -1.37197 | -1.4957  | -1.42269 | -1.47603 | -1.28264 |
| P46940 | Ras GTPase IQGAP1 KIA  | 0.833208 | 0.588963 | 0.375801 | 0.396852 | 0.401658 | 0.171712 | 0.321857 | 0.267944 | -0.07917 | -0.08243 |
| P46976 | Glycogenin GYG1 GYG    | -0.41993 | -0.45694 | -0.75538 | -0.70525 | -0.4471  | -0.59732 | -0.55271 | -0.64954 | -0.50873 | -0.65563 |
| P46977 | Dolichyl-di STT3A ITM: | -0.40065 | -0.52576 | -0.72403 | -0.8011  | -1.33313 | -1.38618 | -0.80863 | -0.60224 | -1.02857 | -1.13927 |
| P47224 | Guanine n RABIF MSS:   | -0.411   | -0.43862 | 0.363436 | 0.304257 | -0.22487 | -0.09603 | -0.26303 | -0.61973 | -0.29739 | 0.034976 |
| P47755 | F-actin-cap CAPZA2     | 0.117004 | 0.219373 | -0.30666 | -0.04016 | -0.53427 | -0.02322 | -0.17022 | 0.043689 | -0.20165 | -0.30409 |
| P47756 | F-actin-cap CAPZB      | 0.766855 | 0.942907 | 0.868672 | 0.836153 | 0.826527 | 0.791478 | 0.845052 | 0.73475  | 0.766664 | 1.016931 |
| P47813 | Eukaryotic EIF1AX EIF1 | -0.01961 | 0.087424 | 0.035792 | -0.20627 | 0.845866 | 0.673083 | 0.166494 | 0.078502 | 0.283063 | 0.486005 |
| P47897 | Glutamine- QARS1 QAF   | -0.63688 | -0.35564 | -0.64352 | -0.50243 | -0.84626 | -0.98769 | -0.93638 | -0.894   | -0.79084 | -0.48842 |
| P47914 | 60S ribosor RPL29      | 2.057923 | 1.908449 | 2.204207 | 1.815219 | 2.022361 | 2.053638 | 1.985862 | 2.106199 | 1.987834 | 2.217326 |
| P47985 | Cytochrom UQCRFS1      | 0.572199 | 0.54518  | 0.686731 | 0.876978 | 0.622774 | 1.250535 | 1.184759 | 1.152376 | 0.118004 | -0.18382 |
| P48047 | ATP syntha ATP5PO AT   | 0.498819 | 0.377229 | 0.989945 | 0.924616 | 0.794816 | 1.109624 | 0.922721 | 1.122959 | 1.154395 | 0.849127 |
| P48059 | LIM and se LIMS1 PINC  | 1.622852 | 1.548103 | 0.751707 | 0.844508 | 0.950834 | 0.676705 | 1.263461 | 1.164827 | 0.762203 | 0.882493 |
| P48147 | Prolyl endc PREP PEP   | 1.195295 | 1.332805 | 0.819558 | 0.909397 | 1.138179 | 1.288761 | -0.35165 | 0.265894 | -0.18057 | 0.026311 |
| P48382 | DNA-bindir RFX5        | -1.4199  | -1.05663 | 0.121079 | -0.30333 | -0.53483 | -0.55683 | -0.43325 | -0.43737 | -0.19159 | -0.08304 |
| P48426 | Phosphatid PIP4K2A PI  | 0.30402  | 0.144571 | 0.357798 | 0.223266 | -0.04704 | 0.031223 | 0.107142 | 0.311405 | -0.12341 | 0.111169 |
| P48444 | Coatomer s ARCN1 COF   | 0.438391 | 0.614693 | 0.60561  | 0.701404 | 0.676212 | 0.551796 | 0.368243 | 0.670241 | 0.418569 | 0.391967 |
| P48454 | Serine/thre PPP3CC CA  | 0.761624 | 0.977034 | 0.755969 | 0.665347 | 0.341158 | 0.610664 | 0.561959 | 0.631036 | 0.626126 | 0.268082 |
| P48506 | Glutamate- GCLC GLCL   | 0.284031 | 0.194991 | -0.04286 | -0.29281 | -0.72394 | -0.44248 | -0.03396 | -0.59956 | -0.17101 | -0.16461 |
| P48507 | Glutamate- GCLM GLCL   | 0.20847  | 0.27275  | 0.432172 | 0.396276 | -0.01495 | -0.22422 | 0.278301 | -0.45372 | -1.08746 | -0.69768 |
| P48553 | Trafficking TRAPPC10   | -1.19438 | -1.6734  | -1.66102 | -1.23078 | -1.15697 | -0.86449 | -1.46713 | -1.29078 | -1.10764 | -1.66223 |
| P48556 | 26S protea PSMD8       | -0.98873 | -0.67064 | -0.9337  | -1.06056 | 0.796692 | 0.455452 | -1.32362 | -1.06143 | -1.74111 | -1.38785 |
| P48634 | Protein PRI PRRC2A BA  | -1.8766  | -1.44049 | -1.49548 | -1.29352 | -1.40914 | -1.45951 | -1.68434 | -1.71104 | -1.48298 | -1.00526 |
| P48637 | Glutathion GSS         | 0.351985 | 0.276275 | -0.25111 | 0.287006 | -0.07851 | 0.209255 | 0.152754 | 0.170452 | 0.019637 | 0.033863 |
| P48643 | T-complex CCT5 CTE     | 0.588998 | 0.67319  | 0.817191 | 0.697542 | 0.632743 | 0.657769 | 0.651612 | 0.584963 | 0.898947 | 0.764788 |
| P48735 | Isocitrate d IDH2      | 0.882417 | 1.251435 | 0.665835 | 0.781628 | 0.258068 | 0.735115 | 1.042482 | 1.019847 | 0.193823 | -0.14416 |
| P48736 | Phosphatid PIK3CG      | -3.37126 | -2.15634 | -2.60064 | -4.52356 | -4.14048 | -2.06711 | -2.96963 | -3.27684 | -3.86507 | -3.06333 |
| P48739 | Phosphatid PITPNB      | 0.621264 | 0.751148 | 0.667494 | 0.643134 | 0.625445 | 0.552281 | 0.480424 | 0.492562 | 0.485489 | 0.556916 |
| P48960 | Adhesion C ADGRE5 CI   | -0.43284 | -0.39433 | -0.21029 | -0.38061 | -0.46351 | -0.06055 | -0.23999 | -0.35593 | -0.54492 | -0.72457 |
| P49005 | DNA polym POLD2        | -0.44769 | -0.45561 | -0.87443 | -0.49516 | -0.70515 | -0.39211 | -0.75381 | -0.36739 | -0.52066 | -0.60456 |
| P49006 | MARCKS-re MARCKSL1     | -0.77588 | -0.61252 | -0.58887 | -0.49676 | -0.58869 | -0.30968 | -0.61599 | -0.46949 | -0.06756 | 0.098355 |

|        |                   |            |          |          |          |          |          |          |          |          |          |          |
|--------|-------------------|------------|----------|----------|----------|----------|----------|----------|----------|----------|----------|----------|
| P49023 | Paxillin          | PXN        | -0.15014 | -0.21019 | -0.06916 | 0.101338 | 0.354272 | 0.047959 | 0.060712 | -0.06417 | 0.140984 | 0.012889 |
| P49116 | Nuclear rec       | NR2C2 TAK  | -0.63337 | -0.14446 | 0.001915 | -0.22227 | 0.110561 | 0.193029 | -0.01263 | 0.076982 | 0.164622 | 0.170646 |
| P49137 | MAP kinase        | MAPKAPK2   | -0.03063 | 0.175978 | -0.16069 | -0.4361  | -0.22487 | -0.42968 | -0.05209 | -0.13808 | -0.5639  | -0.19898 |
| P49189 | 4-trimethyl       | ALDH9A1 A  | 0.568319 | 0.659403 | 0.159952 | 0.365148 | 0.294905 | 0.574239 | 0.466854 | 0.389042 | 0.41727  | 0.069069 |
| P49207 | 60S ribosom       | RPL34      | 0.668692 | 0.688452 | 0.516621 | 0.50357  | 0.520697 | 0.664301 | 0.937235 | 0.757235 | 0.532156 | 0.79593  |
| P49257 | Protein ER        | LMAN1 ER   | 0.848784 | 0.624209 | 0.13282  | 0.395323 | -0.26017 | 0.317123 | 0.441088 | 0.310017 | -0.49585 | -0.5867  |
| P49321 | Nuclear au        | NASP       | 0.250075 | 0.330278 | 0.52661  | 0.367478 | 0.45594  | 0.646675 | 0.074768 | 0.419325 | 0.959668 | 0.714306 |
| P49327 | Fatty acid s      | FASN FAS   | -3.37126 | -1.83094 | -2.02359 | -3.14505 | -2.42999 | -2.87447 | -2.01027 | -1.86876 | -3.39941 | -1.85688 |
| P49368 | T-complex         | CCT3 CCTG  | 0.263033 | 0.440162 | 0.520897 | 0.775353 | 0.641412 | 0.655541 | 0.740032 | 0.581141 | 0.69963  | 0.820221 |
| P49407 | Beta-arrest       | ARRB1 ARR  | -1.26849 | -1.06178 | -1.35543 | -1.2478  | -0.98697 | -1.22772 | -1.26669 | -0.9593  | -0.78974 | -0.80038 |
| P49411 | Elongation        | TUFM       | 0.390584 | 0.618366 | 0.810693 | 0.713271 | 0.768909 | 0.954893 | 1.013266 | 0.935609 | 1.033691 | 0.594837 |
| P49441 | Inositol pol      | INPP1      | -0.54912 | -0.59071 | -0.91792 | -0.89635 | -0.89648 | -0.92986 | -0.76948 | -0.76332 | -0.81364 | -0.58471 |
| P49454 | Centromer         | CENPF      | 0.671236 | 0.869498 | 0.502042 | 0.368829 | 0.935363 | 0.659509 | 0.574694 | 0.684498 | 0.699714 | 0.846029 |
| P49458 | Signal reco       | SRP9       | 1.238335 | 1.324795 | 0.841902 | 0.921996 | 1.203752 | 1.035798 | 0.858263 | 1.100692 | 1.172183 | 1.210777 |
| P49585 | Choline-ph        | PCYT1A CT  | -0.15335 | -0.17563 | -0.152   | -0.39704 | -0.31451 | -0.47454 | -0.15545 | -0.26523 | -0.20021 | -0.36116 |
| P49588 | Alanine--tr       | AARS1 AAR  | 0.272123 | 0.298341 | 0.299396 | 0.247267 | 0.057662 | 0.348073 | 0.286011 | 0.122901 | 0.320041 | 0.294529 |
| P49589 | Cysteine--t       | CARS1 CAR  | 0.070967 | 0.498167 | 0.930929 | 0.682988 | 0.864198 | 0.496743 | 0.757514 | 0.717569 | 0.903928 | 0.943654 |
| P49591 | Serine--trN       | SARS1 SAR  | 0.756234 | 0.93826  | 0.804009 | 0.855891 | 0.764021 | 0.369234 | 0.854802 | 0.726624 | 0.922521 | 0.70112  |
| P49593 | Protein ph        | PPM1F KIA  | -0.39497 | -0.61252 | -0.38672 | -0.64582 | -0.84503 | -0.60145 | -0.7217  | -0.64636 | -0.80618 | 0.166972 |
| P49662 | Caspase-4         | CASP4 ICH  | -0.42569 | -0.17238 | -0.63336 | -0.5012  | -0.7296  | -0.56433 | -0.63564 | -0.56256 | -0.75551 | -0.68807 |
| P49711 | Transcripti       | CTCF       | 0.601037 | 0.732403 | 0.256502 | 0.211054 | 0.309552 | 0.296211 | 0.3355   | -0.13809 | 0.00998  | 0.101016 |
| P49720 | Proteasom         | PSMB3      | -0.25096 | -0.31706 | -1.45457 | -1.05107 | -1.69302 | -1.1989  | -1.15087 | -1.18286 | -1.15936 | -0.93088 |
| P49721 | Proteasom         | PSMB2      | 0.012073 | 0.141044 | -0.16506 | -0.52356 | -0.71727 | 0.313158 | -0.11165 | 0.192645 | -0.24058 | -0.30981 |
| P49736 | DNA replic        | MCM2 BM    | -0.35192 | -0.35762 | -0.5427  | -0.37788 | -1.0721  | -0.93587 | -0.69661 | -1.04654 | -0.82276 | -0.66925 |
| P49748 | Very long-c       | ACADVL VL  | -1.10953 | -1.20046 | -0.63051 | -0.65567 | -1.04532 | -0.73151 | -0.83577 | -0.77761 | -0.83954 | -0.95641 |
| P49750 | YLP motif-c       | YLPM1 C14  | -0.5285  | -0.64264 | -0.12199 | -0.72655 | 0        | -0.32329 | -0.4957  | -0.5764  | -0.20211 | -0.34873 |
| P49755 | Transmeml         | TMED10 TM  | 0.654877 | 0.759616 | 0.099602 | 0.495472 | 0.20045  | 0.360503 | 0.507889 | 0.304825 | -0.27995 | -0.25387 |
| P49756 | RNA-bindin        | RBM25 RN   | 0.280108 | 0.165297 | 0.515742 | 0.555389 | 0.549834 | 0.791656 | 0.730813 | 0.82362  | 0.699714 | 0.911015 |
| P49757 | Protein nur       | NUMB C14   | -1.70499 | -1.33171 | -1.5656  | -1.75803 | -2.26105 | -2.51472 | -1.68012 | -1.53434 | -2.63402 | -2.89566 |
| P49770 | Translation       | EIF2B2 EIF | -4.30986 | -2.60064 | NA       | NA       | NA       | NA       | -3.01027 | -2.80735 | -2.06756 | -4.1008  |
| P49773 | Histidine tr      | HINT1 HIN  | 0.595782 | 0.528464 | 1.348202 | 0.777152 | 1.029444 | 1.153365 | 1.263793 | 1.268273 | 1.467126 | 1.927366 |
| P49790 | Nuclear po        | NUP153     | -0.14662 | -0.25061 | -0.10093 | -0.40255 | -0.21621 | -0.12553 | -0.31937 | -0.25618 | 0.037233 | -0.24544 |
| P49792 | E3 SUMO- $\gamma$ | RANBP2 NL  | -0.55566 | -0.42029 | -0.4447  | -0.79021 | -0.48157 | -0.4565  | -0.52507 | -0.27691 | -0.44398 | -0.48574 |

|        |                        |          |          |          |          |          |          |          |          |          |          |
|--------|------------------------|----------|----------|----------|----------|----------|----------|----------|----------|----------|----------|
| P49796 | Regulator c RGS3       | -1.32496 | -1.35147 | -1.97679 | -2.11757 | -1.51245 | -2.0902  | -1.45305 | -1.29078 | -1.88235 | -2.11991 |
| P49815 | Tuberin (Tu TSC2 TSC4  | -0.71491 | -0.94642 | -0.62449 | -0.8011  | -1       | -0.50524 | -0.46007 | -0.52607 | -0.65006 | -0.66223 |
| P49821 | NADH dehy NDUFV1 U     | 0.20847  | -0.151   | -0.07195 | -0.52356 | -0.87935 | -0.35523 | 0.235488 | -0.27408 | 0.014075 | -0.14906 |
| P49841 | Glycogen s GSK3B       | -1.09719 | -0.76545 | -1.55029 | -0.83037 | -0.92086 | -1.15474 | -1.05702 | -0.94491 | -0.87224 | -1.28356 |
| P49848 | Transcripti TAF6 TAF2I | -0.31848 | -0.49765 | -0.62867 | -0.62831 | -0.45635 | -0.56092 | -0.26634 | -0.20458 | 0.087983 | -0.28145 |
| P49863 | Granzyme I GZMK TRYF   | 0.37002  | -0.06327 | 0.225243 | 0.176536 | 0.494411 | 2.017212 | 1.220066 | 1.158335 | -2.24154 | -1.87747 |
| P49903 | Selenide, w SEPHS1 SEI | 0.886542 | 0.980371 | 1.170791 | 1.10254  | 1.117764 | 1.090032 | 1.005107 | 1.115477 | 1.479014 | 1.31927  |
| P49915 | GMP synth GMPS         | -0.86139 | 0.401202 | -0.53138 | -0.01711 | -0.21591 | -0.28231 | -0.24473 | -0.24936 | -0.00208 | -0.17218 |
| P49916 | DNA ligase LIG3        | -1.25168 | -1.08303 | -1.14768 | -0.71584 | -1.71727 | -1.83494 | -0.73106 | -0.73888 | -1.4245  | -1.41799 |
| P49959 | Double-str: MRE11 HN   | -0.31739 | -0.07195 | -0.14336 | -0.10402 | -0.05376 | 0.23317  | 0.079617 | -0.1571  | 0.164677 | -0.15397 |
| P50148 | Guanine nu GNAQ GAC    | 0.088176 | 0.465798 | 0.220163 | 0.209792 | 0.657475 | 0.415037 | 0.295077 | 0.152003 | 0.104556 | 0.232472 |
| P50213 | Isocitrate d IDH3A     | -0.49647 | -0.34672 | 0.266247 | 0.128876 | 0.245577 | 0.23173  | 0.015739 | 0.172467 | 0.121991 | 0.0649   |
| P50219 | Motor neu MNX1 HLXI    | -4.19438 | -3.77649 | -3.36146 | -2.98751 | -3.51245 | -3.28951 | -3.43911 | -3.51785 | -3.79796 | -2.2402  |
| P50238 | Cysteine-ri CRIP1 CRIP | 1.021062 | 1.027039 | 1.70941  | 1.444529 | 1.348454 | 1.208271 | 0.992306 | 1.215013 | 0.843274 | 0.194304 |
| P50395 | Rab GDP di GDI2 RABG   | -0.02981 | 0.021576 | -0.03154 | 0.06735  | -0.07635 | -0.37534 | -0.0897  | 0.157146 | 0.1533   | 0.319478 |
| P50402 | Emerin EMD EDMC        | -0.14357 | -0.12894 | -0.77608 | -1.21613 | -1.29659 | -1.05571 | -0.70072 | -0.88982 | -1.14886 | -1.00551 |
| P50416 | Carnitine O CPT1A CPT  | -0.409   | -0.37716 | -0.03909 | -0.68562 | -0.72955 | -0.56816 | -0.33166 | -0.95491 | -1.57198 | -0.97369 |
| P50453 | Serpin B9 ( SERPINB9 F | 0.51333  | 0.523901 | -0.10512 | 0.051704 | 0.004204 | 0.115477 | 0.286713 | 0.255639 | 0.372314 | 0.200591 |
| P50502 | Hsc70-inte ST13 AAG2   | 0.333833 | 0.400775 | 0.520395 | 0.347246 | 0.466324 | 0.380363 | 0.293677 | 0.414559 | 0.718177 | 1.113717 |
| P50552 | Vasodilator VASP       | -0.31827 | -0.26096 | 0.114977 | 0.225559 | -0.22487 | -0.03877 | 0.136573 | 0.023094 | 0.007291 | -0.11991 |
| P50570 | Dynamain-2 DNM2 DYN    | 0.254929 | 0.203328 | 0.01165  | 0.198904 | -0.27956 | 0.194169 | 0.195728 | -0.19652 | -0.67111 | -0.39428 |
| P50579 | Methionine METAP2 M    | -0.49394 | -0.48153 | -0.77438 | -0.48794 | -0.32499 | -0.36491 | -0.38466 | -0.34792 | -0.03339 | -0.15843 |
| P50747 | Biotin--pro HLCS       | -3.19438 | -2.57719 | -2.46529 | -3.59756 | -3.27798 | -3.28951 | -3.55459 | -2.30485 | -3.79796 | -3.26127 |
| P50749 | Ras associa RASSF2 CEI | -0.76553 | -0.32894 | -0.21464 | -0.43903 | -0.18406 | -0.24822 | -0.34016 | -0.06791 | -0.39302 | -0.53647 |
| P50750 | Cyclin-depe CDK9 CDC2  | -1.91265 | -1.37441 | -1.49297 | -1.72569 | -1.83179 | -1.77627 | -1.37918 | -1.989   | -1.49499 | -1.6028  |
| P50851 | Lipopolysac LRBA BGL C | -0.36515 | -0.24866 | -0.4047  | -0.40255 | -0.37113 | -0.48525 | -0.3173  | -0.40376 | -0.52346 | -0.35271 |
| P50897 | Palmitoyl-p PPT1 CLN1  | -1.08551 | -1.46425 | -0.70514 | -0.65797 | -1.91675 | -1.84824 | -0.78297 | -0.81829 | -1.70182 | -0.98074 |
| P50914 | 60S ribosor RPL14      | 1.934905 | 1.778095 | 1.32074  | 1.046719 | 1.716045 | 1.388291 | 1.944811 | 1.711421 | 0.873235 | 1.278806 |
| P50990 | T-complex CCT8 C21oi   | 0.448796 | 0.547012 | 0.495892 | 0.468067 | 0.554735 | 0.655496 | 0.578056 | 0.624551 | 0.820611 | 0.919223 |
| P50991 | T-complex CCT4 CCTD    | 0.537227 | 0.710275 | 0.422815 | 0.558288 | 0.633707 | 0.470681 | 0.467779 | 0.559168 | 0.67925  | 0.741513 |
| P50995 | Annexin A1 ANXA11 AN   | -0.08545 | -0.05942 | -0.11161 | -0.17763 | 0.370175 | 0.130195 | 0.147905 | 0.297798 | 0.228448 | 0.30063  |
| P51003 | Poly(A) pol PAPOLA PA  | -1.77801 | -1.17431 | -1.79187 | -2.0018  | -1.30333 | -1.65577 | -1.02759 | -1.96644 | -1.50238 | -0.89547 |
| P51114 | Fragile X m FXR1       | -1.11346 | -1.03953 | -0.41277 | -0.15673 | -0.32445 | -0.42351 | -0.07893 | -0.25671 | -0.55148 | -0.49081 |

|        |                        |          |          |          |          |          |          |          |          |          |          |
|--------|------------------------|----------|----------|----------|----------|----------|----------|----------|----------|----------|----------|
| P51116 | Fragile X m FXR2 FMR1  | -0.08104 | -0.42286 | -0.41244 | -0.53261 | -0.89734 | -0.49576 | -0.44606 | -0.51785 | -0.49584 | -0.40395 |
| P51124 | Granzyme I GZMM ME     | 0.95425  | 0.980217 | -0.74246 | -0.70279 | -0.83058 | -1.08935 | 0.132002 | -0.45259 | -3.1055  | -3.305   |
| P51148 | Ras-related RAB5C RAB  | -0.25096 | -0.04757 | -0.80346 | -1.07731 | -1.41178 | -0.52083 | -0.77323 | -0.62855 | -1.75125 | -1.96546 |
| P51149 | Ras-related RAB7A RAE  | 1.899862 | 1.997688 | 1.302632 | 1.088966 | 1.331236 | 1.207754 | 1.419754 | 1.209306 | 0.929956 | 0.953946 |
| P51151 | Ras-related RAB9A RAE  | -0.13327 | -0.35147 | -0.66102 | -0.40255 | -0.81855 | -0.91511 | -0.87276 | -0.81741 | -0.71049 | -0.65524 |
| P51159 | Ras-related RAB27A RA  | 0.073777 | -0.27898 | -0.48132 | -0.39456 | -0.29158 | -0.47606 | -0.30561 | -0.35332 | -0.7448  | -0.67693 |
| P51178 | 1-phosphat PLCD1       | -2.49518 | -2.65519 | -1.88436 | -2.9034  | -2.76724 | -1.8397  | -2.1777  | -2.58007 | -2.87164 | -2.20127 |
| P51398 | 28S ribosom DAP3 MRP   | -2.80735 | -2.00782 | -2.34156 | -4.14505 | -3.59991 | -2.87447 | -3.61599 | -3.39232 | -2.1281  | -3.44184 |
| P51531 | Probable gl SMARCA2 I  | -1.25096 | -1.1305  | -0.87317 | -1.05107 | -1.31451 | -1.06711 | -0.6477  | -0.93289 | -1.1281  | -0.56083 |
| P51532 | Transcriptio SMARCA4 I | -1.46855 | -1.5656  | -1.41244 | -1.47045 | -1.71727 | -1.07861 | -1.19704 | -1.93289 | -0.59205 | -1.66223 |
| P51553 | Isocitrate d IDH3G     | -0.93129 | -0.37186 | -1.06642 | -1.29916 | -0.8671  | -0.25766 | -1.18023 | -1.19322 | -1.44537 | -1.24848 |
| P51570 | Galactokin; GALK1 GAL  | -0.54906 | -0.29061 | -0.4855  | -0.21925 | -0.61455 | -0.39051 | -0.41536 | -0.47543 | -0.50197 | -0.53042 |
| P51571 | Translocon SSR4 TRAP   | 0.012073 | -0.2185  | -0.85896 | -0.5787  | -0.68105 | -0.78701 | -0.46007 | 0.177538 | -1.30319 | -0.6763  |
| P51572 | B-cell recep BCAP31 BA | 0.904844 | 0.483146 | 0.601307 | 0.559651 | 0.519028 | 0.51755  | 0.494528 | 0.481639 | -0.08545 | -0.21945 |
| P51580 | Thiopurine TPMT        | -1.06193 | -1.4761  | -1.19153 | -1.11757 | -1.74193 | -1.50524 | -1.43911 | -1.65535 | -1.76553 | -1.95641 |
| P51608 | Methyl-Cp( MECP2       | 0.545249 | 0.371884 | 0.848306 | 0.654742 | 1.14931  | 0.961132 | 0.966203 | 0.994997 | 0.794679 | 0.661735 |
| P51610 | Host cell fa HCFC1 HCF | -0.28199 | -0.24398 | 0.148853 | 0.081311 | 0.161638 | -0.25649 | 0.092722 | 0.236638 | 0.19901  | 0.376942 |
| P51648 | Aldehyde d ALDH3A2 A   | -1.3913  | -1.03063 | -1.16028 | -1.48153 | -1.77798 | -0.92032 | -1.37612 | -1.61332 | -1.40999 | -1.36296 |
| P51649 | Succinate-s ALDH5A1 S  | 0.525676 | 0.662164 | 0.770113 | 0.62818  | 0.539639 | 0.700279 | 0.811722 | 0.822222 | 1.525342 | 1.291034 |
| P51659 | Peroxisom; HSD17B4 E   | -0.50712 | -0.55666 | -0.53723 | -0.67727 | -0.58226 | -0.25326 | -0.76305 | -0.53627 | -0.4184  | -0.47996 |
| P51665 | 26S protea PSMD7 MC    | -0.21632 | -0.1699  | -0.27051 | -0.31079 | -0.46214 | -0.03695 | -0.46394 | -0.24348 | -0.22196 | -0.16616 |
| P51668 | Ubiquitin-c UBE2D1 SF  | 0.866733 | 1.141044 | 0.338983 | 0.314381 | -0.07635 | 0.479168 | 0.368243 | 0.094182 | 0.308666 | 0.143125 |
| P51692 | Signal trans STAT5B    | 1.292534 | 1.240108 | 1.357362 | 1.371256 | 1.31895  | 1.433364 | 1.478834 | 1.432111 | 1.199993 | 1.273324 |
| P51808 | Dynein ligh DYNLT3 TC  | 0.440573 | 0.668291 | 0.133954 | 0.143195 | -0.01495 | -0.10776 | -0.15656 | 0.115477 | 0.15624  | 0.213514 |
| P51809 | Vesicle-ass VAMP7 SYE  | 0.540978 | 0.663594 | 0.468007 | 0.170361 | 0.638175 | 0.512375 | 0.376116 | 0.40601  | 0.53477  | 0.261088 |
| P51812 | Ribosomal RPS6KA3 IS   | 1.091024 | 1.223506 | 0.704633 | 0.879024 | 0.739937 | 0.736966 | 0.820451 | 0.146841 | 0.480704 | 0.503021 |
| P51858 | Hepatoma- HDGF HMC     | 0.221087 | 0.26628  | 0.416986 | 0.576575 | 0.726517 | 0.286523 | 0.360295 | 0.39776  | 0.699714 | 0.685291 |
| P51948 | CDK-activa MNAT1 CA    | -0.41908 | -0.14336 | 0.291986 | 0.268252 | 0.086588 | 0.140481 | -0.05209 | -0.38482 | -0.06756 | 0.026311 |
| P51970 | NADH dehy NDUFA8       | 1.195295 | 0.950418 | 0.615823 | 1.108706 | 0.258068 | 1.671568 | 1.292991 | 1.395585 | 0.714156 | 0.127005 |
| P51991 | Heterogen; HNRNPA3 I   | 0.570709 | 0.880905 | 0.577027 | 0.07214  | 0.573136 | 0.326424 | 0.657612 | 0.418207 | 0.685381 | 0.759166 |
| P52209 | 6-phospho; PGD PGDH    | -0.4224  | 0.045434 | -0.57719 | -0.66045 | -0.36591 | -0.08331 | -0.44606 | -0.37683 | -0.08246 | 0.070431 |
| P52272 | Heterogen; HNRNPM I    | 0.184056 | 0.395225 | 0.483613 | 0.165965 | 0.513922 | 0.259387 | 0.471473 | 0.53842  | 0.696296 | 0.670796 |
| P52294 | Importin st KPNA1 RCF  | -0.688   | -0.57403 | -1.29338 | -1.52751 | -1.43338 | -1.50826 | -1.49164 | -1.40075 | -1.07634 | -1.21691 |

|        |                         |          |          |          |          |          |          |          |          |          |          |
|--------|-------------------------|----------|----------|----------|----------|----------|----------|----------|----------|----------|----------|
| P52298 | Nuclear cap NCBP2 CBP   | -1.00434 | -0.58959 | -0.18462 | -0.43051 | -0.18953 | -0.38095 | -0.23166 | -0.37099 | -0.33865 | -0.21434 |
| P52306 | Rap1 GTPa RAP1GDS1      | 0.53981  | 0.826171 | 0.737745 | 0.76184  | 0.365871 | 0.588601 | 0.588369 | 0.622633 | 0.329674 | 0.471508 |
| P52333 | Tyrosine-pr JAK3        | 0.155031 | -0.17383 | -0.43335 | -0.26806 | 0.264273 | -0.35091 | 0.127235 | 0.317341 | -0.36257 | -0.44786 |
| P52434 | DNA-direct POLR2H       | -0.40098 | -0.23016 | -0.96743 | -0.5687  | -0.61029 | -0.48019 | -0.505   | -0.71558 | -0.45126 | -0.46203 |
| P52564 | Dual specif MAP2K6 M    | -1.28524 | -1.14373 | -0.47599 | -0.71539 | -0.85252 | -0.70724 | -0.70696 | -0.91252 | -0.78642 | -0.61077 |
| P52565 | Rho GDP-d ARHGDI A C    | 0.548126 | 0.366464 | 0.67754  | 0.22728  | 0.694708 | 0.105854 | 0.437553 | 0.358228 | 0.565979 | 0.727434 |
| P52566 | Rho GDP-d ARHGDI B C    | 0.572039 | 0.38143  | 1.223852 | 1.025151 | 1.39332  | 1.126343 | 1.033162 | 1.240082 | 1.59847  | 1.49474  |
| P52594 | Arf-GAP do AGFG1 HRE    | 0.319501 | 0.58756  | 0.723647 | 0.678072 | 0.614406 | 0.844349 | 0.776328 | 0.730079 | 0.652505 | 0.899199 |
| P52597 | Heterogen HNRNPF HI     | 0.922166 | 1.210217 | 0.740082 | 0.365016 | 0.67155  | 0.402689 | 0.616359 | 0.592576 | 0.480226 | 0.425577 |
| P52630 | Signal trans STAT2      | -3.43539 | -2.03953 | -3.20945 | -1.84549 | -3.59991 | -1.83494 | -2.07346 | -3.45372 | -3.93546 | -2.00888 |
| P52701 | DNA mism MSH6 GTBI      | -0.14789 | 0.084379 | -0.01027 | 0.284942 | 0.176182 | 0.280487 | -0.18221 | -0.11328 | -0.07184 | -0.13581 |
| P52739 | Zinc finger ZNF131      | 0.053549 | 0.493758 | 0.399356 | 0.925999 | 0.422455 | 0.259387 | 0.290901 | 0.045088 | 0.028014 | 0.284267 |
| P52747 | Zinc finger ZNF143 SBI  | -0.90345 | -0.88007 | -0.93017 | -0.93363 | -1.31451 | -0.78286 | -1.28232 | -0.89275 | -0.89577 | -1.03331 |
| P52756 | RNA-bindin RBM5 H37     | -0.36317 | -0.51216 | 0.096514 | -0.05221 | 0.133212 | -0.21251 | -0.10465 | -0.20444 | 0.109264 | 0.281178 |
| P52788 | Spermine s SMS          | 0.588998 | 0.618366 | 0.490986 | 0.378512 | 0.676212 | 0.377671 | 0.31166  | 0.626346 | 0.185556 | 0.429349 |
| P52815 | 39S ribosor MRPL12 M    | 1.015923 | 1.250944 | 1.511892 | 1.504133 | 1.26772  | 1.292081 | 1.370264 | 1.508082 | 1.646294 | 1.419515 |
| P52824 | Diacylglyce DGKQ DAG    | 0.488887 | 0.646038 | 0.269518 | -0.13813 | 0.28883  | -0.24349 | 0.108376 | -0.29078 | -0.39941 | -0.25597 |
| P52888 | Thimet olig THOP1       | -0.21534 | -0.03953 | -0.48699 | -0.67557 | -0.62263 | -0.32329 | -0.5175  | -0.4459  | -0.14365 | -0.04495 |
| P52907 | F-actin-cap CAPZA1      | 0.03823  | -0.10512 | 0.362426 | 0.631654 | 0.437398 | 0.356498 | 0.356049 | 0.46305  | 0.324958 | 0.360346 |
| P52943 | Cysteine-ric CRIP2 CRP2 | -0.41193 | -0.76326 | -2.60064 | -1.27563 | -1.06075 | -1.14958 | -0.4636  | -0.41123 | -1.74959 | -1.01781 |
| P52948 | Nuclear po NUP98 AD/    | -0.07464 | 0        | 0.102698 | 0.352043 | 0.107892 | 0.254858 | -0.02382 | -0.04881 | 0.210218 | 0.42432  |
| P53004 | Biliverdin r BLVRA BLV  | 1.135235 | 1.009421 | 0.959525 | 0.98349  | 0.662389 | 0.571844 | 1.222066 | 1.142186 | 0.78485  | 0.801971 |
| P53007 | Tricarboxyl SLC25A1 SL  | 1.676935 | 1.688997 | 1.393431 | 1.061401 | 0.757639 | 1.138    | 1.633588 | 0.666576 | 0.995278 | 0.759796 |
| P53041 | Serine/thre PPP5C PPP   | -0.33258 | -0.81714 | -0.37656 | -0.17306 | -0.39158 | -0.37906 | -0.25691 | -0.21573 | -0.3932  | -0.54783 |
| P53384 | Cytosolic F NUBP1 NBF   | -1.40798 | -1.65315 | -0.82775 | -0.76751 | -1.68046 | -1.07542 | -0.94648 | -1.41897 | -0.89509 | -0.84627 |
| P53396 | ATP-citrate ACLY        | 0.488887 | 0.182864 | 1.086401 | 0.833592 | 0.510352 | 0.300782 | 0.953791 | 0.921047 | 0.690054 | 0.724516 |
| P53567 | CCAAT/enr CEBPG         | -3.89482 | -2.03953 | -1.20945 | -1.10402 | -0.89947 | -1.26303 | -1.60039 | -1.43812 | -1.31487 | -1.36004 |
| P53582 | Methionin METAP1 KI     | -0.03423 | 0.371836 | 0.466458 | 0.813711 | 0.648358 | 0.607407 | 0.432798 | 0.309766 | 0.601446 | 0.528393 |
| P53597 | Succinate-- SUCLG1      | 1.835146 | 1.737189 | 2.201043 | 2.177488 | 2.153841 | 2.355945 | 2.163436 | 2.095413 | 2.574469 | 2.339061 |
| P53602 | Diphospho MVD MPD       | -0.28749 | -0.44392 | -0.5427  | -1.07731 | -0.97056 | -0.88452 | -0.70492 | -0.64636 | -1.05772 | -0.89752 |
| P53611 | Geranylger RABGGTB C    | -1.29017 | -1.63661 | -1.39237 | -1.59769 | -2.03656 | -1.03321 | -1.75608 | -1.87012 | -1.2718  | -1.8007  |
| P53618 | Coatomer s COPB1 COF    | 0.878264 | 0.947775 | 0.743773 | 0.637105 | 0.439193 | 0.311513 | 0.715263 | 0.259783 | 0.307426 | 0.558706 |
| P53621 | Coatomer s COPA         | 0.611953 | 0.515144 | 0.753974 | 0.529549 | 0.543763 | 0.613459 | 0.521395 | 0.526546 | 0.449971 | 0.416566 |

|        |                        |          |          |          |          |          |          |          |          |          |          |
|--------|------------------------|----------|----------|----------|----------|----------|----------|----------|----------|----------|----------|
| P53634 | Dipeptidyl   CTSC CPPI | 1.003028 | 1.21177  | -0.03154 | 0.476438 | 0.319381 | 0.56308  | 0.78229  | 0.367016 | -0.70498 | -0.57521 |
| P53803 | DNA-direct POLR2K      | -1.23245 | -1.627   | -0.92301 | -1.73591 | -1.43041 | -0.82195 | -1.31745 | -1.56242 | -0.80001 | -0.77181 |
| P53990 | IST1 homol IST1 KIAA0  | 1.100941 | 1.128374 | 1.00943  | 0.868755 | 1.06447  | 0.839633 | 1.049717 | 1.048033 | 1.114784 | 1.127496 |
| P53992 | Protein tra SEC24C KIA | -0.67682 | -0.65019 | -0.3225  | -0.44641 | -0.3448  | -0.59794 | -0.39434 | -0.39136 | -0.53243 | -0.49399 |
| P53999 | Activated F SUB1 PC4 F | 1.352193 | 1.250323 | 0.974997 | 0.820671 | 0.889529 | 0.630938 | 0.843397 | 0.381325 | 1.187627 | 0.926056 |
| P54098 | DNA polym POLG MDP     | -0.59104 | -0.36647 | -0.07605 | 0.143195 | -0.83173 | -0.71348 | -0.68834 | -1.22239 | -0.89107 | -0.74882 |
| P54105 | Methylosol CLNS1A CL   | -0.95964 | -0.79048 | -1.04136 | -1.1841  | -1.1525  | -1.16852 | -0.87746 | -1.17814 | -0.64292 | -0.52601 |
| P54136 | Arginine--t RARS1 RAR  | 0.098637 | 0.140311 | 0.370577 | 0.134963 | 0.251836 | 0.398549 | 0.125743 | 0.317341 | 0.317421 | 0.320157 |
| P54252 | Ataxin-3 (E ATXN3 ATX  | -1.44708 | -1.73096 | -0.81297 | -1.47314 | -0.98101 | -1.47497 | -1.35544 | -1.22003 | -0.76931 | -0.85618 |
| P54577 | Tyrosine--t YARS1 YAR  | 1.262529 | 1.0925   | 1.248338 | 1.027954 | 1.083082 | 1.024384 | 1.26559  | 1.241889 | 1.141356 | 0.877684 |
| P54578 | Ubiquitin c USP14 TGT  | 0.405319 | 0.421888 | -0.31498 | -0.10259 | -0.04014 | 0.113059 | 0.022283 | -0.19881 | -0.32134 | -0.06333 |
| P54619 | 5'-AMP-act PRKAG1      | 1.390295 | 1.274556 | 0.391498 | 0.295104 | 0.525708 | 0.73685  | 0.70441  | 0.32723  | 0.271106 | 0.00877  |
| P54709 | Sodium/po ATP1B3       | 0.59702  | 0.256763 | 0.006126 | 0.161893 | -0.82324 | 0.35058  | 0.367049 | 0.321592 | -0.44881 | -0.64696 |
| P54725 | UV excisior RAD23A     | -0.99114 | -0.7307  | -1.43335 | -0.89129 | -2.04696 | -2.15371 | -1.12793 | -1.72761 | -1.68825 | -1.21596 |
| P54727 | UV excisior RAD23B     | 0.155698 | 0.036022 | 0.692303 | 0.528959 | 1.018711 | 0.943935 | 1.352441 | 1.033497 | 0.379315 | 0.192379 |
| P54819 | Adenylate   AK2 ADK2   | 0.529335 | 0.471434 | 0.124599 | 0.223266 | 0.51172  | 0.465684 | 0.511291 | 0.304698 | 0.648901 | -0.11072 |
| P54886 | Delta-1-pyr ALDH18A1   | -0.71849 | -0.74204 | -0.05554 | -0.32998 | -0.46053 | -0.28617 | -0.48273 | -0.41603 | -0.57994 | -0.48832 |
| P54920 | Alpha-solul NAPA SNAF  | 0.028318 | 0.029805 | -0.31812 | -0.17275 | -0.44434 | -0.0137  | -0.39747 | -0.05684 | -0.0076  | 0.017428 |
| P55010 | Eukaryotic EIF5        | -0.17372 | -0.16944 | -0.07195 | 0.055377 | -0.01495 | -0.28284 | -0.25691 | -0.07641 | -0.38702 | 0.198166 |
| P55036 | 26S protea PSMD4 MC    | 0.741807 | 0.921242 | 0.42862  | 0.439912 | 0.036712 | 0.160177 | 0.344264 | 0.375867 | 0.393664 | 0.599639 |
| P55039 | Developme DRG2         | 0.678829 | 0.786031 | 0.625965 | 0.559651 | 0.594844 | 0.394398 | 0.543443 | 0.534473 | 0.285644 | 0.320157 |
| P55060 | Exportin-2 CSE1L CAS   | 0.832139 | 0.745922 | 0.327109 | 0.231622 | 0.219913 | 0.133909 | 0.420319 | -0.02477 | 0.039716 | 0.253147 |
| P55072 | Transitiona VCP        | 0.035907 | 0.147046 | 0.115412 | 0.005646 | -0.04532 | -0.12464 | 0.114098 | -0.00795 | 0.225717 | 0.218064 |
| P55081 | Microfibrill MFAP1     | -1.48568 | -1.3814  | -1.32282 | -0.9926  | -1.09021 | -0.89669 | -1.19516 | -0.88322 | -0.91024 | -0.84751 |
| P55084 | Trifunction HADHB MS   | 0.868653 | 0.811395 | 0.708451 | 0.806525 | 0.431773 | 0.533944 | 0.735017 | 0.626346 | 0.590077 | 0.34127  |
| P55145 | Mesenceptl MANF ARN    | -0.21594 | -0.19415 | 0.293008 | 0.25996  | -0.40759 | 0.136792 | -0.26219 | -0.04959 | -0.25763 | -0.40517 |
| P55160 | Nck-associ NCKAP1L H   | 0.560511 | 0.717244 | -0.06528 | 0.046902 | -0.05509 | 0.020681 | 0.019658 | -0.21211 | 0.015682 | 0.070214 |
| P55196 | Afadin (ALL AFDN AF6 I | -3.89482 | -2.24598 | -1.97679 | -1.61667 | -1.66918 | -1.60145 | -2.28157 | -1.80735 | -2.39941 | -2.00888 |
| P55198 | Protein AF- MLLT6 AF1  | -0.80735 | -0.79667 | -1.13906 | -2.0126  | -0.68105 | -1.30293 | -1.46713 | -1.18286 | -1.07748 | -1.27191 |
| P55199 | RNA polym ELL C19orf   | -1.56563 | -1.59841 | -2.05147 | -1.58906 | -1.58355 | -1.25718 | -1.34795 | -1.44607 | -1.95751 | -1.58277 |
| P55201 | Peregrin (B BRPF1 BR1  | -0.818   | -1.07195 | -1.80346 | -2.03814 | -1.12418 | -1.27621 | -1.35819 | -1.53434 | -1.32665 | -2.26127 |
| P55209 | Nucleosom NAP1L1 NR    | -0.22302 | -0.03522 | 0.353884 | -0.11598 | 0.351979 | 0.425086 | 0.09211  | 0.21486  | 0.514142 | 0.190502 |
| P55210 | Caspase-7 ( CASP7 MCl  | -0.15398 | -0.41069 | 0.10029  | 0.015433 | -0.45192 | -0.4104  | -0.18893 | -0.16542 | -0.65903 | -0.97857 |

|        |                         |          |          |          |          |          |          |          |          |          |          |
|--------|-------------------------|----------|----------|----------|----------|----------|----------|----------|----------|----------|----------|
| P55263 | Adenosine ADK           | 0.409613 | 0.424861 | 0.786031 | 0.739472 | 1.079567 | 0.905476 | 1.041636 | 1.071874 | 0.73646  | 0.455133 |
| P55265 | Double-str ADAR ADAI    | -0.19438 | -0.03154 | 0.023207 | -0.12439 | 0.160396 | 0.120434 | 0.159657 | 0.088809 | 0.202044 | 0.450553 |
| P55290 | Cadherin-1 CDH13 CDH    | 0.953805 | 1.384498 | 0.96647  | 1.128925 | 1.168271 | 1.058894 | 0.622    | 1.099536 | 0.664453 | 0.445688 |
| P55327 | Tumor prot TPD52        | -1.02445 | -1.30256 | -1.04757 | -1.3377  | -0.63876 | -0.57401 | -0.7161  | -0.66146 | -0.72992 | -0.84884 |
| P55735 | Protein SEC SEC13 D3S   | -0.42969 | -0.52032 | -1.00391 | -0.81908 | -0.98859 | -0.76042 | -0.5549  | -0.8819  | -1.05858 | -1.04469 |
| P55769 | NHP2-like ꞑ SNU13 NHF   | -0.12003 | 0.269518 | -0.19599 | 0.043253 | 0.200987 | -0.0614  | 0.050273 | -0.02308 | 0.147754 | 0.194304 |
| P55786 | Puromycin NPEPPS PS     | 0.160465 | 0.23349  | -0.20722 | -0.00685 | 0.02457  | 0.142967 | 0.169196 | 0.045088 | 0.189695 | 0.319582 |
| P55789 | FAD-linked GFER ALR F   | -0.67588 | -0.05971 | 0.304669 | 0.309328 | 0.003671 | -0.03317 | -0.03929 | -0.21671 | 0.254365 | 0.365517 |
| P55795 | Heterogen HNRNPH2 I     | -0.70499 | -0.61252 | -0.87168 | -0.79126 | -0.85124 | -0.81862 | -0.99589 | -0.65651 | -0.62399 | -0.88939 |
| P55809 | Succinyl-Cc OXCT1 OXC   | 1.239609 | 1.20488  | 1.153367 | 1.16853  | 0.964356 | 1.255795 | 1.156341 | 1.283654 | 1.54653  | 1.148552 |
| P55854 | Small ubiq SUMO3 SM     | 1.966269 | 2.136617 | 1.299926 | 1.453718 | 1.669214 | 1.299902 | 1.590069 | 1.775937 | 1.96782  | 1.81869  |
| P55884 | Eukaryotic EIF3B EIF3E  | -1.11346 | -0.41764 | -0.0843  | -0.13813 | -0.00746 | -0.26303 | -0.44606 | -0.22239 | -0.10257 | -0.12956 |
| P56182 | Ribosomal RRP1 D21S     | -0.94062 | -1.15634 | -1.06378 | -0.90298 | -0.79256 | -0.9783  | -0.96963 | -1.2091  | -1.57089 | -1.2402  |
| P56192 | Methionine MARS1 MA     | 0.413062 | 0.467677 | 0.105243 | 0.073373 | 0.121186 | 0.356485 | 0.574694 | 0.110183 | 0.301033 | 0.135088 |
| P56211 | cAMP-regu ARPP19        | 0.488887 | 0.440162 | 1.894883 | 1.705257 | 1.666874 | 1.975197 | 1.715317 | 1.860348 | 1.981017 | 2.042515 |
| P56270 | Myc-associ MAZ ZNF8C    | 0.110807 | 0.595323 | 1.27275  | 1.102877 | -0.54463 | 0.160177 | 1.241992 | 1.128629 | 0.584963 | 0.03065  |
| P56377 | AP-1 comp AP1S2 DC2     | -0.01524 | 0.057456 | 0.111164 | 0.068912 | 0.097932 | 0.120398 | -0.15467 | 0.156632 | -0.24184 | 0.029553 |
| P56378 | ATP syntha ATP5MPL C    | 0.246256 | 0.022794 | -0.68562 | -0.359   | -1.28115 | 0.424431 | 0.045571 | 0.061044 | -1.46005 | -1.14776 |
| P56385 | ATP syntha ATP5ME A1    | 0.989243 | 0.785965 | 0.503771 | 0.356948 | 0.205803 | 0.869908 | 0.591511 | 0.343595 | 0.148087 | -0.27062 |
| P56537 | Eukaryotic EIF6 EIF3A   | -0.51911 | -0.44659 | -0.70367 | -0.9242  | -1.1914  | -0.98205 | -0.94758 | -0.64671 | -0.56459 | -0.40587 |
| P56556 | NADH dehy NDUFA6 LY     | 2.338802 | 2.275973 | 1.285602 | 2.083768 | 1.757639 | 2.361811 | 2.316803 | 2.226068 | 1.920032 | 1.067014 |
| P56715 | Oxygen-reg RP1 ORP1     | 0.218924 | 1.142811 | 1.360402 | 0.809146 | 1.072512 | 0.431339 | 1.042843 | 0.534473 | 1.472233 | 2.059602 |
| P57076 | Cilia- and fl CFAP298 C | -1.5915  | -1.71228 | -2.31587 | -1.99665 | -3.10193 | -2.67034 | -2.88646 | -2.57863 | -1.34045 | -1.24157 |
| P57105 | Synaptojan SYNJ2BP OI   | -2.07199 | -1.44205 | -1.97884 | -3.37277 | -2.69302 | -2.63072 | -2.24234 | -2.30153 | -2.24725 | -2.41047 |
| P57682 | Krueppel-li KLF3 BKLF   | -2.15695 | -2.56398 | -2.19605 | -1.95686 | -3.07635 | -2       | -2.96963 | -2.97728 | -3.1281  | -2.2402  |
| P57721 | Poly(rC)-bir PCBP3 PCB  | 1.751963 | 1.731882 | 1.907995 | 1.830055 | 1.69213  | 1.805838 | 1.67509  | 1.621532 | 1.942818 | 1.773514 |
| P57737 | Coronin-7 ( CORO7       | 0.503912 | 0.44795  | 0.905542 | 0.818819 | 0.934161 | 1.011509 | 0.815934 | 0.851137 | 0.495234 | 0.450225 |
| P57740 | Nuclear po NUP107       | -0.61869 | -0.75002 | -1.20945 | -1.36976 | -1.12418 | -1.48981 | -1.10613 | -1.27684 | -1.25739 | -1.1788  |
| P57764 | Gasdermin GSDMD DF      | 0.568707 | 0.690206 | 0.641046 | 0.716752 | 0.748815 | 0.90105  | 0.384011 | 0.877588 | 0.449971 | 0.527789 |
| P57772 | Selenocyst EEFSEC SEL   | -0.90613 | -0.82402 | -0.95918 | -0.82261 | -1.1038  | -0.74806 | -0.63966 | -1.02426 | -0.98129 | -0.96691 |
| P58107 | Epiplakin ( EPPK1 EPIP  | -0.63993 | -0.41764 | 0.361919 | 0.131176 | 0.350497 | 0.693698 | -0.61886 | -0.12096 | 0.549234 | 0.368842 |
| P58546 | Myotrophii MTPN         | 0.652724 | 0.716759 | 0.868802 | 0.52088  | 0.754057 | 0.206835 | 0.348033 | 0.18041  | 0.747447 | 0.996133 |
| P59768 | Guanine nu GNG2         | 1.499645 | 1.522544 | 0.934185 | 0.95541  | 1.348454 | 1.138    | 1.411195 | 1.253941 | 1.147754 | 1.006623 |



|        |              |          |       |          |          |          |          |          |          |          |          |          |          |
|--------|--------------|----------|-------|----------|----------|----------|----------|----------|----------|----------|----------|----------|----------|
| P59998 | Actin-relate | ARPC4    | ARC   | 0.883555 | 0.976413 | 0.850224 | 0.801968 | 0.592728 | 0.489934 | 0.631938 | 0.789106 | 0.637542 | 0.909203 |
| P60002 | Transcripti  | ELOF1    |       | 0.189969 | 0.295653 | 0.305522 | 0.052783 | 0.043059 | 0.311963 | 0.356115 | 0.369709 | 0.185073 | 0.180712 |
| P60033 | CD81 antig   | CD81     | TAPA  | 0.234465 | 0.387482 | -0.5427  | -0.24558 | -1.06075 | -0.42968 | -0.39808 | -0.43812 | -0.93546 | -1.04495 |
| P60059 | Protein tra  | SEC61G   |       | -1.3023  | -1.24267 | -1.13053 | -0.17161 | -0.75907 | -0.44096 | -0.95677 | 0.5048   | -0.90309 | -0.80707 |
| P60174 | Triosephos   | TPI1     | TPI   | 0.675647 | 0.941955 | 0.805799 | 0.968434 | 0.524273 | 1.258291 | 0.880757 | 0.709459 | 0.246936 | 0.417298 |
| P60228 | Eukaryotic   | EIF3E    | EIF3S | 0.839892 | 0.921889 | 1.005713 | 0.858414 | 0.503375 | 1.000409 | 0.661349 | 0.655715 | 0.540274 | 0.815592 |
| P60468 | Protein tra  | SEC61B   |       | 0.471504 | -0.2185  | 0.186295 | 0.966729 | 0.643261 | 0.481778 | 0.103623 | 1.589353 | 0.619129 | 0.116548 |
| P60510 | Serine/thre  | PPP4C    | PPP   | -2.79253 | -2.33254 | -2.84658 | -2.49181 | -3.07635 | -3.28951 | -2.71681 | -3.06083 | -2.19146 | -2.90817 |
| P60520 | Gamma-an     | GABARAPL |       | 1.059379 | 0.998049 | 0.847997 | 1.009378 | 0.895942 | 0.975197 | 0.929227 | 0.688056 | 0.889817 | 0.86316  |
| P60660 | Myosin lig   | MYL6     |       | -0.1617  | 0.172522 | 0.647807 | 0.319802 | 0.434539 | 0.409767 | 0.458633 | 0.370605 | 0.791302 | 0.948834 |
| P60709 | Actin, cyto  | ACTB     |       | 0.067241 | 0.038474 | -0.2276  | 0.220599 | -0.23359 | -0.26961 | 0.122543 | -0.0115  | -0.20211 | 0.073337 |
| P60842 | Eukaryotic   | EIF4A1   | DD    | 1.00028  | 1.030932 | 0.618366 | 0.609837 | 0.604658 | 0.656046 | 1.094291 | 0.622633 | 0.382857 | 0.235716 |
| P60866 | 40S ribosor  | RPS20    |       | 0.849314 | 0.912816 | 1.320387 | 0.893282 | 0.882173 | 0.764756 | 1.240253 | 0.700378 | 1.395773 | 1.393591 |
| P60891 | Ribose-phc   | PRPS1    |       | 0.66797  | 0.596029 | 0.623437 | 0.912733 | 0.409752 | 0.786415 | 1.149775 | 1.110183 | 1.119823 | 1.245596 |
| P60900 | Proteasom    | PSMA6    | PRC   | 0.065184 | 0.030861 | -0.49246 | -0.27563 | -0.46036 | -0.40054 | -0.13955 | -0.22909 | 0.100164 | 0.066195 |
| P60903 | Protein S1   | S100A10  | AI    | 0.78681  | 1.333235 | 1.823324 | 2.204045 | 1.447993 | 1.261387 | 1.920129 | 1.800717 | 0.330123 | 0.221871 |
| P60953 | Cell divisio | CDC42    |       | 1.316165 | 1.365465 | 0.855061 | 1.347462 | 0.68085  | 1.427473 | 1.155967 | 1.376689 | 0.266504 | 0.64726  |
| P60981 | Destrin (Ac  | DSTN     | ACTD  | 0.389322 | 0.186231 | 0.825047 | 0.804073 | 0.855414 | 0.704092 | 0.57467  | 0.517356 | 0.539779 | 0.135128 |
| P60983 | Glia matur   | GMFB     |       | -0.28663 | -0.30669 | -0.34413 | -0.36985 | -0.41043 | -0.31742 | -0.55123 | -0.70685 | -0.48263 | 0.092283 |
| P61006 | Ras-relatec  | RAB8A    | MEI   | -0.51111 | -0.09675 | 0.393431 | 0.397684 | 0.141554 | 0.41913  | 0.426503 | 0.280108 | 0.15624  | -0.18886 |
| P61009 | Signal pept  | SPCS3    | SPC   | -0.0502  | 0.174242 | -0.69079 | -0.53192 | -1.17511 | -0.43583 | -0.40658 | -0.43887 | -1.34055 | -1.40037 |
| P61011 | Signal reco  | SRP54    |       | 0.15874  | 0.275441 | 0.359692 | 0.039532 | 0.477773 | 0.428385 | -0.07459 | 0.331059 | 0.141354 | -0.06796 |
| P61018 | Ras-relatec  | RAB4B    | PP1   | 1.073849 | 1.072245 | 0.384498 | 0.299168 | 0.022139 | 0.410933 | 0.418869 | 0.321928 | 0.028014 | 0.155098 |
| P61019 | Ras-relatec  | RAB2A    | RAE   | 0.903903 | 0.902554 | 0.450603 | 0.554568 | -0.07363 | 0.521112 | 0.428719 | 0.531929 | -0.025   | -0.05536 |
| P61020 | Ras-relatec  | RAB5B    |       | -1.71807 | -1.49327 | -1.40619 | -2.59201 | -1.82757 | -2.11537 | -1.90649 | -1.7077  | -1.58778 | -1.5321  |
| P61026 | Ras-relatec  | RAB10    |       | 0.672285 | 0.798975 | 0.725954 | 0.521812 | 0.567014 | 1.014417 | 1.036272 | 0.890531 | 0.23204  | 0.256489 |
| P61081 | NEDD8-cor    | UBE2M    | UB    | 0.216032 | 0.170574 | -0.14463 | -0.19472 | -0.18853 | 0.17008  | 0.068534 | 0.013615 | 0.135045 | -0.04126 |
| P61086 | Ubiquitin-c  | UBE2K    | HIP   | 0.31054  | 0.666072 | 0.134812 | 0.39766  | 0.214965 | 0.110388 | 0.19935  | 0.203623 | 0.343856 | 0.579746 |
| P61106 | Ras-relatec  | RAB14    |       | 1.342289 | 1.254682 | 1.198095 | 1.147364 | 0.891718 | 1.079143 | 1.031586 | 0.946873 | 0.460297 | 0.58938  |
| P61129 | Zinc finger  | ZC3H6    | KIA   | -1.72489 | -1.64874 | -1.93147 | -1.40255 | -3.35199 | -3.04439 | -1.42531 | -1.30485 | -2.32723 | -2.28958 |
| P61158 | Actin-relate | ACTR3    | ARP   | 0.686383 | 0.693039 | 0.285173 | 0.19066  | -0.03138 | 0.193689 | 0.195667 | 0.406127 | 0.08815  | 0.198161 |
| P61160 | Actin-relate | ACTR2    | ARP   | 0.760305 | 0.595323 | 0.638246 | 0.49436  | 0.481342 | 0.510195 | 0.57614  | 0.688056 | 0.530515 | 0.645625 |
| P61163 | Alpha-cent   | ACTR1A   | CT    | -1.46894 | -0.9799  | -0.21749 | -0.03955 | -0.37109 | -0.58324 | -0.35995 | -0.18286 | -0.74033 | -0.42986 |

|        |             |           |          |          |          |          |          |          |          |          |          |          |
|--------|-------------|-----------|----------|----------|----------|----------|----------|----------|----------|----------|----------|----------|
| P61165 | Transmeml   | TMEM258   | -1.23661 | -1.58887 | -1.6734  | -0.41086 | -1.41009 | -1.18641 | -1.68012 | 0.045088 | -1.83112 | -1.18886 |
| P61201 | COP9 signa  | COPS2 CSN | 0.012073 | 0.378434 | -0.48699 | -0.03814 | 0.147718 | 0.180857 | -0.46713 | -0.37737 | -0.44361 | 0.170908 |
| P61204 | ADP-ribosy  | ARF3      | 1.209514 | 1.885416 | 0.77468  | 0.520329 | 1.043943 | 0.447459 | 0.755266 | 0.67776  | 1.082462 | 0.968684 |
| P61221 | ATP-bindin  | ABCE1 RLI | -0.87245 | -0.68589 | 0.351262 | -0.05107 | -0.34252 | 0.19878  | -0.23868 | 0.045088 | 0.147754 | 0.509253 |
| P61224 | Ras-relatec | RAP1B OK/ | 1.726323 | 2.024124 | -1.61797 | -1.17094 | 0.852299 | 1.351136 | -1.15649 | -1.15829 | -1.41411 | -1.97327 |
| P61225 | Ras-relatec | RAP2B     | 0.47587  | 0.76094  | -0.04757 | 0.102877 | -0.17365 | -0.635   | 0.164229 | 0.115477 | -0.50919 | -0.49075 |
| P61244 | Protein ma  | MAX BHLH  | -0.79775 | -0.57719 | -1.72403 | -1.8011  | -1.14929 | -1.17728 | -1.36893 | -1.15083 | -0.74169 | -0.57965 |
| P61247 | 40S ribosor | RPS3A FTE | 0.105996 | 0.348202 | 0.80637  | 0.462849 | 0.973734 | 0.792388 | 0.856874 | 0.546282 | 0.862411 | 0.598394 |
| P61254 | 60S ribosor | RPL26     | 1.221526 | 1.394915 | 1.113508 | 0.822768 | 1.220194 | 1.24283  | 1.25156  | 1.201298 | 1.096539 | 1.151885 |
| P61289 | Proteasom   | PSME3     | -0.09392 | 0.108863 | 0.146083 | 0.098085 | -0.269   | -0.07861 | -0.04679 | -0.08854 | 0.13493  | 0.056413 |
| P61313 | 60S ribosor | RPL15 EC4 | 0.663603 | 0.808469 | 0.685364 | 0.324435 | 0.604658 | 0.016302 | 0.522227 | -0.04654 | 0.494156 | 0.596716 |
| P61326 | Protein ma  | MAGOH M   | 0.454697 | 0.537362 | -0.30917 | -0.09808 | -0.36249 | -0.05254 | -0.3069  | -0.27484 | -0.12778 | -0.31507 |
| P61353 | 60S ribosor | RPL27     | -0.28338 | -0.52665 | -0.02014 | -0.31414 | 0.157516 | 0.083472 | 0.064756 | -0.11676 | 0.028548 | 0.242679 |
| P61421 | V-type pro  | ATP6V0D1  | -1.80735 | -1.5541  | -1.69849 | -1.54171 | -1.53382 | -1.30293 | -2.16227 | -1.43812 | -1.95361 | -1.20918 |
| P61513 | 60S ribosor | RPL37A    | 1.200095 | 1.023731 | 0.826918 | 0.72075  | 1.200856 | 0.812648 | 0.898306 | 0.912503 | 0.713474 | 0.87775  |
| P61586 | Transformi  | RHOA ARH  | -0.28011 | -0.07195 | -0.44923 | -0.152   | -0.39046 | -0.24998 | -0.5697  | -0.22239 | -0.45003 | -0.66223 |
| P61604 | 10 kDa hea  | HSPE1     | 1.456679 | 1.526079 | 1.908746 | 1.452976 | 1.67155  | 1.741876 | 1.469627 | 1.780943 | 2.003532 | 1.669985 |
| P61619 | Protein tra | SEC61A1 S | -1.21302 | -1.30836 | -1.61776 | -0.90594 | -0.9466  | -1.21668 | -1.35498 | -0.49818 | -1.14985 | -1.26447 |
| P61758 | Prefoldin s | VBP1 PFDN | -0.30367 | -0.10165 | -0.07717 | -0.2369  | 0.139909 | 0.026411 | -0.24105 | 0.130369 | -0.01055 | -0.01644 |
| P61916 | NPC intrac  | NPC2 HE1  | 0.070967 | -0.20495 | 1.369485 | 1.165737 | 1.291871 | 1.402689 | 1.405413 | 1.698177 | 0.932437 | 0.619939 |
| P61923 | Coatomer    | COPZ1 COF | -0.39497 | -0.59474 | 0.477047 | 0.288936 | 0        | 0.514027 | 0.094068 | 0.126008 | 0.301033 | 0.455403 |
| P61927 | 60S ribosor | RPL37     | 1.242173 | 1.184581 | -1.12179 | -1.28789 | 1.342602 | 0.819792 | 1.175598 | 1.175005 | -1.34178 | -1.56043 |
| P61956 | Small ubiq  | SUMO2 SM  | 1.837443 | 2.132674 | 1.514862 | 1.507434 | 1.600243 | 1.456135 | 1.468881 | 1.559861 | 1.665346 | 1.565232 |
| P61962 | DDB1- and   | DCAF7 HAN | -2.44175 | -1.74758 | -1.85543 | -1.33778 | -2.19102 | -2.1154  | -2.21485 | -2.0199  | -2.22975 | -2.42013 |
| P61964 | WD repeat   | WDR5 BIG  | 0.973608 | 1.012174 | 0.232422 | 0.674762 | 0.115313 | 0.840799 | 0.842393 | 0.377477 | -0.10297 | -0.16856 |
| P61966 | AP-1 comp   | AP1S1 AP1 | -1.12663 | -1.41244 | -1.5656  | -1.50564 | -3.51245 | -3.18641 | -1.9898  | -1.65535 | -2.06756 | -1.20918 |
| P61970 | Nuclear tra | NUTF2 NTF | 0.980536 | 0.905773 | 0.698177 | 0.893337 | 0.800564 | 0.814621 | 0.976348 | 0.920601 | 1.154763 | 0.975536 |
| P61978 | Heterogen   | HNRNPK HI | 0.934905 | 0.917767 | 0.931041 | 0.716752 | 0.931764 | 0.609962 | 1.00607  | 0.988724 | 1.104556 | 0.894446 |
| P61981 | 14-3-3 pro  | YWHAQ     | -0.18057 | -0.01287 | 0.075778 | 0.25916  | 0.167527 | 0.091066 | 0.079788 | 0.375867 | 0.246317 | 0.333664 |
| P62070 | Ras-relatec | RRAS2 TC2 | -1.30986 | -1.32193 | -0.70483 | -0.62632 | -0.77973 | -0.89465 | -0.82667 | -1.80735 | -1.68753 | -1.63448 |
| P62072 | Mitochond   | TIMM10 TI | 0.008431 | 0.125643 | 0.113396 | 0.395649 | 0.476714 | 0.587733 | -0.313   | -0.69188 | 0.438903 | 0.376342 |
| P62081 | 40S ribosor | RPS7      | 0.767661 | 0.782436 | 1.119069 | 0.990126 | 1.134529 | 1.271709 | 1.026021 | 1.100177 | 1.159995 | 1.013808 |
| P62136 | Serine/thre | PPP1CA PP | 0.350372 | 0.536112 | 0.685984 | 0.640509 | 0.414378 | 0.550049 | 0.633453 | 0.642163 | 0.609253 | 0.232313 |

|        |                       |          |          |          |          |          |          |          |          |          |          |
|--------|-----------------------|----------|----------|----------|----------|----------|----------|----------|----------|----------|----------|
| P62140 | Serine/thre PPP1CB    | 0.097667 | 0.326131 | 0.389506 | 0.503883 | -0.32888 | 0.335237 | 0.290858 | -0.13    | -0.03837 | 0.292365 |
| P62191 | 26S protea PSMC1      | 0.236854 | 0.344701 | 0.363347 | 0.161978 | 0.116782 | 0.223729 | 0.091764 | 0.224601 | 0.447908 | 0.321918 |
| P62195 | 26S protea PSMC5 SUC  | -0.2949  | -0.25252 | -0.31507 | -0.13792 | -0.19903 | 0.016302 | -0.26039 | -0.18286 | -0.06756 | 0.205861 |
| P62241 | 40S ribosor RPS8 OK/S | 1.044943 | 0.929373 | 0.91465  | 0.554606 | 1.122045 | 1.213517 | 0.713423 | 0.888413 | 0.972052 | 0.838138 |
| P62244 | 40S ribosor RPS15A OK | 1.027023 | 1.232085 | 1.206711 | 1.380922 | 1.210659 | 1.358618 | 1.553936 | 1.399931 | 1.275942 | 0.982189 |
| P62249 | 40S ribosor RPS16     | 1.247289 | 1.488209 | 0.399356 | 0.4899   | 0.405712 | 0.31755  | 0.332124 | 0.380272 | 0.230452 | 0.351712 |
| P62258 | 14-3-3 prot YWHAE     | -0.46877 | -0.71985 | -0.55345 | -0.42215 | -0.41799 | -0.24376 | -0.44248 | -0.74905 | -0.79767 | -0.40858 |
| P62263 | 40S ribosor RPS14 PRO | 0.746032 | 0.688627 | 0.413723 | 0.195472 | 0.237264 | 0.146472 | 0.455274 | 0.078392 | 0.215616 | 0.60907  |
| P62266 | 40S ribosor RPS23     | 1.464549 | 1.456425 | 1.276534 | 1.027295 | 1.452745 | 1.367098 | 1.544934 | 1.356984 | 1.426482 | 1.246789 |
| P62269 | 40S ribosor RPS18 D6S | 0.501685 | 0.506948 | 0.819399 | 0.627643 | 1.179126 | 0.916523 | 1.099835 | 0.821994 | 0.857059 | 0.974841 |
| P62273 | 40S ribosor RPS29     | 0.74228  | 0.907656 | 0.361549 | 0.563876 | 0.52011  | 0.525936 | 0.603552 | 0.014339 | 0.653932 | 0.515793 |
| P62277 | 40S ribosor RPS13     | 1.662137 | 1.920648 | 1.159962 | 0.720564 | 1.497158 | 1.326334 | 1.521237 | 1.240615 | 0.89743  | 1.069593 |
| P62280 | 40S ribosor RPS11     | 0.969355 | 0.952074 | 0.551614 | 0.845586 | 1.005304 | 0.809009 | 0.663355 | 0.659304 | 0.869317 | 0.982262 |
| P62304 | Small nucle SNRPE     | 0.770518 | 1.034673 | 0.220163 | -0.18728 | -0.34252 | 0.208271 | -0.07346 | 0.056143 | -0.11273 | 0.287896 |
| P62306 | Small nucle SNRPF PBS | -1.8892  | -2.62209 | -1.85896 | -1.26053 | -0.92749 | -1.0902  | -1.12832 | -0.63743 | -1.46297 | -1.54137 |
| P62308 | Small nucle SNRPG PBS | 1.105182 | 1.032768 | -0.52015 | -0.32979 | -0.33313 | -0.01097 | 0.286713 | 0.083416 | 0.032631 | -0.21945 |
| P62310 | U6 snRNA-i LSM3 MDS   | -1.06193 | -1.28345 | -0.22304 | -0.41086 | -0.66918 | -0.36491 | -0.54709 | -0.36257 | 0.164677 | 0.008824 |
| P62312 | U6 snRNA-i LSM6       | 0.996966 | 0.90116  | 0.996096 | 1.15451  | 0.875821 | 1.07195  | 0.945257 | 0.956411 | 1.23246  | 1.186547 |
| P62314 | Small nucle SNRPD1    | -0.68966 | -0.637   | -0.46413 | -0.57956 | -0.83727 | -0.85416 | -1.03156 | -0.59791 | -0.59502 | -0.68704 |
| P62316 | Small nucle SNRPD2 SN | 1.612977 | 1.532014 | 0.847563 | 0.823395 | 1.027006 | 0.736966 | 1.454773 | 1.411521 | 0.751041 | 0.634265 |
| P62318 | Small nucle SNRPD3    | -0.38125 | -0.14545 | -0.66028 | -0.61554 | -0.55552 | -0.35091 | -0.44075 | -0.52607 | -0.94923 | -0.60726 |
| P62328 | Thymosin k TMSB4X TE  | 0.518916 | 0.534472 | 1.054681 | 0.944418 | 0.901193 | 0.589049 | 0.727843 | 1.113296 | 0.944909 | 0.537874 |
| P62330 | ADP-ribosy ARF6       | 0.782083 | 0.82887  | 0.332688 | 0.369341 | 0.164876 | 0.233349 | 0.16071  | 0.403148 | -0.08565 | -0.05241 |
| P62333 | 26S protea PSMC6 SUC  | 0.080073 | 0.125166 | 0.203185 | 0.278177 | 0.291842 | 0.547835 | 0.255317 | 0.362385 | 0.329392 | 0.097763 |
| P62424 | 60S ribosor RPL7A SUR | 1.786304 | 1.501432 | 0.89219  | 0.723491 | 1.072512 | 1.012947 | 1.174365 | 1.018736 | 0.767752 | 0.753904 |
| P62487 | DNA-direct POLR2G RP  | -0.97232 | -0.48396 | -1.2276  | -1.35364 | -0.98595 | -0.91338 | -1.35819 | -1.18286 | -0.98126 | -1.52855 |
| P62495 | Eukaryotic ETF1 ERF1  | 0.224123 | 0.485427 | -0.2576  | -0.21652 | -0.29798 | 0.044938 | -0.20726 | -0.36002 | -0.20503 | -0.11619 |
| P62633 | Cellular nu CNBP RNF1 | 0.245015 | 0.470284 | 0.099643 | -0.17306 | -0.05302 | 0.189226 | 0.143539 | -0.65792 | 0.254365 | 0.135854 |
| P62701 | 40S ribosor RPS4X CCG | 1.130888 | 1.316678 | 0.754021 | 0.731939 | 1.297428 | 1.022942 | 1.082036 | 0.761089 | 0.773279 | 0.887286 |
| P62714 | Serine/thre PPP2CB    | -1.17029 | -1.10633 | -0.71739 | -0.79153 | -0.65126 | -0.71144 | -0.83996 | -1.0869  | -0.67337 | -0.66067 |
| P62750 | 60S ribosor RPL23A    | 1.377789 | 1.297797 | 1.688096 | 1.53172  | 1.772952 | 1.313158 | 1.51866  | 1.417183 | 1.547789 | 1.429807 |
| P62753 | 40S ribosor RPS6 OK/S | 1.083688 | 1.070389 | 1.030861 | 0.654356 | 1.033082 | 0.93002  | 1.045324 | 1.017074 | 0.902483 | 0.882493 |
| P62805 | Histone H4 H4C1 H4/A  | 2.006049 | 2.349245 | 0.019365 | 0.344335 | 0.251836 | 1.150363 | 0.93459  | 0.146841 | -0.62076 | -0.41914 |

|        |                        |          |          |          |          |          |          |          |          |          |          |
|--------|------------------------|----------|----------|----------|----------|----------|----------|----------|----------|----------|----------|
| P62820 | Ras-relatec RAB1A RAE  | -1.34023 | -1.07195 | -0.90933 | -0.10402 | -1.53382 | -1.04439 | -1.08427 | 0.25634  | -0.92647 | -1.20918 |
| P62826 | GTP-bindin RAN ARA24   | 0.941233 | 0.948399 | 0.582361 | 0.383329 | 0.919723 | 0.23173  | 0.631938 | 0.202629 | 0.685127 | 1.026311 |
| P62829 | 60S ribosor RPL23      | 1.467019 | 1.390459 | 1.202067 | 0.847315 | 1.513829 | 1.297685 | 1.254911 | 0.991387 | 1.456218 | 1.541536 |
| P62834 | Ras-relatec RAP1A KRE  | -1.11978 | -0.76561 | -2.20595 | -1.78174 | -0.8335  | -1.58299 | -0.88473 | -0.79738 | -1.77309 | -1.75635 |
| P62841 | 40S ribosor RPS15 RIG  | 1.605028 | 1.406728 | 1.519827 | 0.885829 | 1.650386 | 1.52166  | 1.524007 | 1.561879 | 1.388271 | 1.224919 |
| P62847 | 40S ribosor RPS24      | 1.601436 | 1.663631 | 1.54672  | 0.937936 | 1.40099  | 1.124526 | 1.679604 | 1.079031 | 1.607865 | 1.798038 |
| P62851 | 40S ribosor RPS25      | 0.982117 | 0.930643 | 1.679642 | 1.702852 | 1.881754 | 1.351709 | 1.6474   | 1.479825 | 2.088845 | 2.199514 |
| P62854 | 40S ribosor RPS26      | 1.073849 | 1.11067  | 0.189718 | -0.0126  | 0.584963 | 0.259387 | 0.543443 | 0.246722 | 0.407948 | 0.416143 |
| P62857 | 40S ribosor RPS28      | -0.4765  | -0.55364 | -0.31464 | 0.055401 | -0.03495 | -0.35406 | -0.16879 | -0.12836 | 0.104323 | 0.192868 |
| P62873 | Guanine nt GNB1        | 0.224123 | 0.437285 | 0.2824   | 0.471923 | 0.300954 | 0.548063 | 0.340229 | 0.61891  | 0.658492 | 0.163024 |
| P62875 | DNA-direct POLR2L      | 1.590944 | 1.610981 | 1.503058 | 1.474322 | 1.735156 | 1.651865 | 1.699248 | 1.659436 | 1.713668 | 1.82793  |
| P62877 | E3 ubiquitin RBX1 RNF7 | 0.285091 | 0.830562 | 0.641046 | 0.64235  | 0.923649 | 0.6386   | 0.702799 | 0.152003 | 1.183481 | 1.632839 |
| P62879 | Guanine nt GNB2        | 0.13975  | 0.123836 | -0.42948 | -0.31358 | -0.53499 | -0.13256 | -0.04804 | -0.26451 | -0.45594 | -0.31671 |
| P62888 | 60S ribosor RPL30      | 0.080027 | 0.481374 | 0.078807 | 0.25458  | 0.126481 | 0.109784 | 0.3739   | 0.088769 | -0.11545 | 0.058963 |
| P62899 | 60S ribosor RPL31      | 1.029995 | 1.269042 | 1.604473 | 1.225077 | 1.62399  | 1.77259  | 1.595873 | 1.490326 | 1.266124 | 1.281711 |
| P62906 | 60S ribosor RPL10A NE  | 1.27604  | 1.23619  | 0.622057 | 0.486054 | 0.935063 | 0.5366   | 0.686697 | 0.572547 | 0.8096   | 1.061478 |
| P62910 | 60S ribosor RPL32 PP94 | 1.149576 | 0.828368 | 0.474036 | 0.471845 | 1.466176 | 1.508275 | 1.127235 | 1.421464 | 0.406217 | 0.631001 |
| P62913 | 60S ribosor RPL11      | 0.488524 | 0.797231 | 0.740735 | 1.041913 | 0.919723 | 0.791656 | 0.801472 | 0.86507  | 0.60005  | 0.73608  |
| P62917 | 60S ribosor RPL8       | 0.7663   | 0.77468  | 0.918731 | 0.820696 | 1.087336 | 1.153808 | 0.989145 | 0.824301 | 0.944504 | 1.210956 |
| P62942 | Peptidyl-pr FKBP1A FKI | -1.25096 | -1.34034 | -1.95318 | -1.36278 | -1.26569 | -1.64314 | -1.04325 | -1.31449 | -1.17055 | -1.5046  |
| P62993 | Growth fac GRB2 ASH    | 0.381307 | 0.46014  | 0.116077 | 0.354182 | 0.422455 | 0.467359 | 0.261328 | 0.321928 | 0.304855 | 0.353514 |
| P62995 | Transformε TRA2B SFR3  | 0.834547 | 0.744007 | 1.634782 | 1.289197 | 1.232977 | 1.150363 | 0.900967 | 1.100544 | 1.515751 | 1.648451 |
| P63010 | AP-2 comp AP2B1 ADT    | -0.90923 | -1.05337 | -0.83392 | -0.84202 | -0.65826 | -0.83504 | -0.7963  | -0.95236 | -0.87082 | -0.89486 |
| P63027 | Vesicle-ass VAMP2 SYE  | -2.11036 | -1.28658 | -1.4018  | -1.56151 | -1.43839 | -1.60921 | -1.50616 | -1.42106 | -0.97225 | -0.80173 |
| P63092 | Guanine nt GNAS GNA1   | 0.178098 | 0.220072 | 0.407479 | 0.333921 | 0.504902 | 0.684218 | 0.403548 | 0.462671 | 0.3132   | 0.248457 |
| P63098 | Calcineurin PPP3R1 CN  | 1.270059 | 1.290466 | 1.073631 | 1.051185 | 0.857163 | 1.350882 | 0.841236 | 0.771303 | 0.222907 | 0.374874 |
| P63104 | 14-3-3 protYWHAZ       | 0.008437 | 0.0846   | 0.265989 | 0.263034 | 0.172645 | 0.445787 | 0.065807 | 0.141661 | 0.581244 | 0.471394 |
| P63146 | Ubiquitin-c UBE2B RAC  | -0.42351 | -0.84897 | -1.12562 | -0.44312 | -1.02061 | -0.62795 | -0.84519 | -0.9413  | -0.80244 | -0.7525  |
| P63151 | Serine/thre PPP2R2A    | -1.04818 | -1.21824 | -1.27674 | -1.68594 | -1.19906 | -1.36404 | -1.68606 | -1.38246 | -1.69151 | -1.79065 |
| P63167 | Dynein ligh DYNLL1 DL1 | 0.012073 | -0.10932 | 2.207555 | 2.253858 | 2.197749 | 1.90105  | 2.158511 | 2.16355  | 1.788372 | 1.687445 |
| P63173 | 60S ribosor RPL38      | 0.950672 | 0.754021 | 0.648528 | 0.819846 | 1.276604 | 0.544321 | 1.198071 | 0.652077 | 0.667425 | 0.911015 |
| P63208 | S-phase kin SKP1 EMC1  | -0.37467 | -0.49362 | -0.30646 | -0.35932 | -0.38818 | -0.43898 | -0.42657 | -0.80222 | -0.09061 | -0.16665 |
| P63218 | Guanine nt GNG5 GNG    | 1.612977 | 1.782635 | 2.240933 | 2.020243 | 1.977516 | 1.568474 | 1.82479  | 1.882255 | 1.696808 | 1.392739 |

|        |                        |          |          |          |          |          |          |          |          |          |          |
|--------|------------------------|----------|----------|----------|----------|----------|----------|----------|----------|----------|----------|
| P63220 | 40S ribosom RPS21      | 1.464793 | 1.467835 | 1.421645 | 0.859992 | 1.410932 | 1.229053 | 1.36603  | 1.349228 | 1.77373  | 1.572837 |
| P63241 | Eukaryotic EIF5A       | 1.839892 | 1.742414 | 1.258152 | 1.196873 | 1.488875 | 1.00273  | 1.393778 | 1.031149 | 1.5099   | 1.417801 |
| P63244 | Receptor o RACK1 GNE   | 0.135817 | 0.11967  | -0.56927 | -0.2738  | -0.38528 | 0.273446 | -0.11971 | -0.19689 | -0.45885 | -0.23614 |
| P63272 | Transcripti SUPT4H1 S  | -2.47996 | -1.52577 | -1.95461 | -2.68735 | -2.52631 | -1.70631 | -2.2129  | -2.40145 | -1.26875 | -1.92052 |
| P63313 | Thymosin k TMSB10 PT   | 0.098814 | 0.291553 | -0.01933 | 0.225045 | 0.2856   | 0.039001 | 0.057211 | 0.203957 | 0.584438 | 0.15269  |
| P67775 | Serine/thre PPP2CA     | -0.80986 | -0.72472 | -0.17832 | -0.4386  | -0.98708 | -0.45631 | -0.39645 | -0.72079 | -0.42985 | -0.4636  |
| P67809 | Y-box-bindl YBX1 NSEP  | -0.73603 | -0.56198 | -1.1518  | -1.05102 | -0.9791  | -1.47143 | -1.40753 | -1.13969 | -0.88135 | -0.6706  |
| P67812 | Signal pept SEC11A SEC | -0.22264 | -0.7047  | 1.250064 | 1.433444 | 0.548079 | 1.009388 | 1.726165 | 1.146939 | 0.489047 | 0.177312 |
| P67870 | Casein kina CSNK2B CK  | 1.059379 | 0.923946 | 0.636037 | 0.9874   | 0.239291 | 0.92139  | 0.891116 | 0.419325 | 0.490805 | 0.455403 |
| P67936 | Tropomyos TPM4         | 0.116409 | 0.295167 | 0.807953 | 0.88243  | 0.31895  | 0.289447 | 0.574694 | 0.29762  | 0.069042 | 0.429349 |
| P68032 | Actin, alph: ACTC1 ACT | 0.029946 | 0.236799 | 0.382724 | 0.236659 | 0.18799  | 0.205851 | 0.215596 | 0.217477 | 0.242458 | 0.392739 |
| P68036 | Ubiquitin-c UBE2L3 UB  | 1.268031 | 1.370857 | 1.328463 | 1.432735 | 1.261174 | 1.116645 | 1.299811 | 1.427102 | 1.393825 | 1.311496 |
| P68104 | Elongation EEF1A1 EEF  | 0.842983 | 1.040807 | 1.016948 | 1.14647  | 1.028984 | 1.202088 | 1.128007 | 1.112772 | 0.947683 | 1.064949 |
| P68366 | Tubulin alp TUBA4A TL  | 0.338802 | 0.152155 | 1.226842 | 1.204358 | 0.946564 | 1.047041 | 0.926538 | 0.916091 | 0.863213 | 0.797523 |
| P68371 | Tubulin bet TUBB4B TU  | -1.55778 | -2.11309 | 0.166965 | 0.101259 | -0.14292 | -0.13182 | -0.08789 | -0.10246 | -0.27213 | -0.09795 |
| P68400 | Casein kina CSNK2A1 C  | -0.20383 | -0.1031  | -1.05116 | -1.05319 | -1.34165 | -0.6723  | -1.20399 | -0.94323 | -0.74838 | -0.86838 |
| P68402 | Platelet-act PAFAH1B2  | 2.395201 | 2.60817  | 2.262222 | 2.236659 | 2.009266 | 2.279786 | 2.435042 | 2.306966 | 2.301989 | 2.353445 |
| P68431 | Histone H3 H3C1 H3FA   | -2.94062 | -1.90202 | -2.03953 | -1.71621 | -2.84503 | -2.42968 | -1.58496 | -3.27684 | -4.16993 | -4.0268  |
| P78316 | Nucleolar ç NOP14 C4c  | -2.85042 | -2.24598 | -1.36146 | -1.2909  | -2.64572 | -1.95693 | -2.18536 | -1.72935 | -1.45003 | -1.1008  |
| P78318 | Immunoglc IGBP1 IBP1   | 0.47587  | 0.462972 | 1.030861 | 0.650365 | 0.96233  | 0.610242 | 0.854802 | 1.00286  | 1.086908 | 1.087983 |
| P78332 | RNA-bindin RBM6 DEF3   | -0.72824 | -0.45738 | -0.54839 | -0.79021 | -0.40024 | -0.33015 | -0.41163 | -0.59358 | -0.45003 | -0.16385 |
| P78344 | Eukaryotic EIF4G2 DAF  | 0.42711  | 0.548103 | 0.468619 | 0.439912 | 0.220266 | 0.690316 | 0.231136 | 0.498454 | 0.055495 | -0.11032 |
| P78346 | Ribonuclea RPP30 RNA   | -0.72489 | -0.82402 | -0.33171 | -0.35364 | -1.19052 | -0.72247 | -0.60039 | -1.07039 | -0.53629 | -0.10555 |
| P78347 | General tra GTF2I BAP1 | -1.64689 | -1.46529 | -2.04849 | -2.28732 | -1.09212 | -1.85457 | -1.53964 | -1.63743 | -1.83112 | -1.38294 |
| P78356 | Phosphatid PIP4K2B PIP | -1.3399  | -1.18562 | 0.130357 | 0.180221 | -0.65643 | -1.15402 | -0.84225 | -0.75642 | -0.50707 | -0.61059 |
| P78362 | SRSF protei SRPK2      | -0.90603 | -0.59804 | -0.43628 | -0.89661 | -0.96936 | -0.43299 | -0.34847 | -0.46497 | -0.36453 | -0.52781 |
| P78364 | Polyhomec PHC1 EDR1    | -4.08746 | -4.72403 | -4.07195 | -3.9386  | NA       | NA       | -3.81762 | -3.58496 | -4.00946 | -3.76377 |
| P78371 | T-complex CCT2 99D8    | 0.326551 | 0.431515 | 0.221862 | 0.291435 | 0.336655 | 0.408564 | 0.36262  | 0.379016 | 0.676491 | 0.493938 |
| P78406 | mRNA expc RAE1 MRN1    | 0.742976 | 0.7325   | 1.016912 | 1.024539 | 0.754198 | 1.2643   | 1.141492 | 1.012427 | 0.837775 | 0.431352 |
| P78410 | Butyrophili BTN3A2 BT  | -0.82873 | -0.76983 | 0.2824   | 0.666263 | -0.23359 | -0.45943 | 0.407343 | -0.05247 | -0.77357 | -0.52218 |
| P78417 | Glutathionc GSTO1 GST  | 2.019836 | 2.108378 | 0.64638  | 1.130209 | 0.423883 | 0.282378 | 1.423611 | 1.226825 | 1.160761 | 1.064084 |
| P78527 | DNA-deper PRKDC HYR    | 0.028784 | 0.112475 | -0.29879 | -0.31411 | -0.47478 | -0.30286 | -0.0548  | -0.23581 | -0.33942 | -0.23755 |
| P78537 | Biogenesis BLOC1S1 B   | -0.51238 | -0.52867 | -0.72466 | -0.76951 | -0.63427 | -0.4733  | -0.70639 | -0.84594 | -0.30076 | -0.52086 |

|        |              |             |          |          |          |          |          |          |          |          |          |          |
|--------|--------------|-------------|----------|----------|----------|----------|----------|----------|----------|----------|----------|----------|
| P78563 | Double-str   | ADARB1 A    | -2.40296 | -2.2847  | -2.28345 | -2.75803 | -3.35399 | -2.75332 | -2.13955 | -3.72935 | -2.64028 | -3.17936 |
| P80217 | Interferon-  | IFI35 IFP35 | -0.19965 | 0.590067 | 0.15686  | 0.464264 | 0.424257 | 0.27733  | 0.345623 | 0.345305 | 0.585867 | 0.54598  |
| P80297 | Metallothio  | MT1X        | -2.48873 | -1.74338 | -1.46751 | -1.84075 | -2.87844 | -2.14455 | -1.94622 | -1.87194 | -1.71391 | -1.94184 |
| P80303 | Nucleobinc   | NUCB2 NEF   | 0.044639 | 0.239991 | 0.221206 | 0.100046 | -0.29475 | -0.0436  | -0.13435 | 0.206496 | 0.519337 | 0.459891 |
| P80723 | Brain acid s | BASP1 NAP   | 0.643934 | 0.921557 | 0.11307  | -0.12463 | 0.34901  | -0.01913 | -0.36148 | -0.43204 | -0.21523 | -0.24627 |
| P81877 | Single-strar | SSBP2 SSDF  | -1.82873 | -2.02359 | -2.05565 | -1.27563 | -1.24236 | -1.70454 | -1.42531 | -1.6735  | -1.62803 | -1.26127 |
| P82094 | TATA elem    | TMF1 ARA1   | -0.76249 | -1.05642 | -0.39193 | -0.57544 | -0.61223 | -0.63166 | -0.62132 | -0.72201 | -0.32774 | -0.77971 |
| P82650 | 28S ribosor  | MRPS22 C3   | -0.30935 | -0.36407 | -0.45849 | -0.32886 | -1.07244 | -0.35664 | -0.38351 | -0.29514 | -0.80965 | -0.50987 |
| P82663 | 28S ribosor  | MRPS25 RF   | 1.009064 | 0.896979 | 0.847997 | 0.9874   | 1.018473 | 0.759737 | 1.122543 | 0.950498 | 1.06454  | 1.178749 |
| P82673 | 28S ribosor  | MRPS35 M    | 0.777608 | 0.744743 | 0.482639 | 0.294061 | 0.3249   | 0.471306 | 0.661349 | 0.767554 | 0.756633 | 0.499895 |
| P82909 | 28S ribosor  | MRPS36 KC   | -0.22948 | -0.33171 | 0.144576 | -0.32193 | -0.16528 | -0.1315  | 0.094068 | 0.380272 | 0.046393 | 0.047877 |
| P82912 | 28S ribosor  | MRPS11 RF   | -0.65404 | -0.64014 | -0.69277 | -1.2432  | -1.04778 | -0.46887 | -0.26517 | -0.51506 | -0.44602 | -0.63655 |
| P82930 | 28S ribosor  | MRPS34      | -1.242   | -1.67051 | -1.23749 | -2.28992 | -1.94177 | -1.21803 | -1.01796 | -1.88283 | -1.195   | -2.11748 |
| P82933 | 28S ribosor  | MRPS9 RPI   | -0.63743 | -0.48699 | -1.26459 | -0.79405 | -1.00377 | -0.65924 | -1.0409  | -0.83773 | -0.76736 | -0.82653 |
| P82979 | SAP domai    | SARNP HCC   | 0.759818 | 1.068531 | 0.432422 | 0.227949 | 0.256013 | 0.261754 | 0.591652 | 0.584959 | 0.371969 | 0.424817 |
| P83111 | Serine beta  | LACTB MRF   | 0.438197 | 0.472483 | 0.747075 | 0.75937  | 0.833823 | 0.797432 | 0.744483 | 0.999071 | 0.719116 | 0.669343 |
| P83436 | Conserved    | COG7 UNQ    | -0.35566 | -0.34156 | -0.48699 | -0.53261 | -0.79256 | -0.89465 | -0.47422 | -0.11309 | -0.66493 | -0.76377 |
| P83731 | 60S ribosor  | RPL24       | 0.727234 | 0.46014  | 0.269518 | 0.126054 | 0.342602 | 0.566631 | 0.680628 | 0.680932 | 0.371969 | 0.258602 |
| P83881 | 60S ribosor  | RPL36A RPI  | 1.467519 | 1.212223 | 1.714796 | 1.351783 | 2.006175 | 1.600478 | 1.824495 | 1.657482 | 1.455855 | 1.52048  |
| P83916 | Chromobo     | CBX1 CBX    | 0.360408 | 0.454741 | 0.970902 | 0.585951 | 0.910566 | 0.738573 | 0.703418 | 0.696522 | 1.303035 | 1.161047 |
| P84074 | Neuron-sp    | HPCA BDR2   | -0.9579  | -0.33329 | -0.86459 | -0.67064 | -0.83361 | -0.25673 | -0.24606 | -0.13661 | -0.92029 | -0.28293 |
| P84085 | ADP-ribosy   | ARF5        | 1.728281 | 1.91369  | 1.241553 | 1.060602 | 1.063644 | 1.220306 | 1.380955 | 1.348919 | 1.066387 | 0.969811 |
| P84090 | Enhancer o   | ERH         | 0.763394 | 1.074098 | 0.133937 | 0.609837 | -0.45017 | 0.529253 | 0.399607 | 0.770913 | 0.281771 | 0.57905  |
| P84095 | Rho-relate   | RHOG ARH    | -0.1669  | -0.01568 | 0.217428 | 0.109456 | -0.1467  | -0.29202 | -0.22666 | -0.58496 | -0.07748 | 0.0051   |
| P84098 | 60S ribosor  | RPL19       | 0.018072 | 0.410579 | 1.227881 | 0.755619 | 0.899076 | 0.891045 | 1.005588 | 1.012293 | 1.087112 | 1.009258 |
| P84103 | Serine/argi  | SRSF3 SFRS  | -0.03684 | -0.09675 | 0.349832 | 0.309328 | 0.643917 | 0.139723 | 0.23105  | 0.098446 | 0.382857 | 0.221127 |
| P84157 | Matrix-rem   | MXRA7       | -2.72489 | -2.57719 | -3.72403 | -1.07731 | -3.27798 | -1.10188 | -2.05209 | -1.36257 | -1.81444 | -1.51584 |
| P84243 | Histone H3   | H3-3A H3.3  | -0.95869 | -0.59337 | -1.62057 | -0.80144 | -0.91602 | -0.77476 | -1.21554 | -0.74855 | -1.76698 | -1.74892 |
| P85037 | Forkhead b   | FOXK1 MN    | -1.09649 | -0.78998 | -1.37119 | -0.574   | -1.4855  | -1.02425 | -0.89966 | -1.38113 | -1.10725 | -0.68383 |
| P86790 | Vacuolar fu  | CCZ1B C7o   | -0.2949  | -0.41244 | 0.223506 | -0.01894 | -0.14048 | 0.135515 | 0.387926 | 0.321928 | 0.160465 | -0.07727 |
| P98170 | E3 ubiquiti  | XIAP API3 E | -0.83484 | -1.0786  | -1.52418 | -1.53118 | -0.98312 | -1.65722 | -1.01466 | -0.72242 | -0.96694 | -1.53303 |
| P98171 | Rho GTPas    | ARHGAP4 k   | 0.299939 | 0.419903 | 0.595323 | 0.597862 | 0.466176 | 0.540568 | 0.155069 | 0.251539 | 0.277888 | 0.447683 |
| P98175 | RNA-bindin   | RBM10 DX'   | -0.99069 | -0.93379 | -0.4752  | -0.95763 | -0.48059 | -0.30183 | -0.16418 | -0.44021 | -0.58606 | -0.32126 |

|        |                                 |          |          |          |          |          |          |          |          |          |          |
|--------|---------------------------------|----------|----------|----------|----------|----------|----------|----------|----------|----------|----------|
| P98179 | RNA-binding RBM3 RNP            | -1.01967 | -0.68816 | -0.36999 | -0.24761 | -0.65156 | -0.42852 | -0.32958 | -0.52196 | -0.33379 | -0.17466 |
| Q00059 | Transcription TFAM TCF6         | 0.554361 | 0.840178 | 0.645166 | 0.612374 | 1.130707 | 0.607075 | 0.896881 | 0.764124 | 0.541871 | 0.653946 |
| Q00169 | Phosphatidyl PITPNA PIT         | 0.872763 | 0.817472 | -0.10107 | 0.293508 | -0.78364 | 0.615129 | 0.472553 | 0.425693 | -0.66024 | -0.81388 |
| Q00325 | Phosphate SLC25A3 PI            | 0.972831 | 0.954033 | 0.980373 | 1.063064 | 0.433517 | 1.203339 | 1.239673 | 1.238118 | 0.273883 | -0.40959 |
| Q00341 | Vigilin (High) HDLBP HBF        | 0.467126 | 0.462972 | 0.348202 | 0.299168 | 0.919723 | 0.743508 | 0.286713 | 0.633745 | 0.578663 | 0.536968 |
| Q00403 | Transcription GTF2B TF2I        | -0.31335 | -0.21423 | -0.01963 | -0.7857  | -0.09212 | -0.04974 | 0.030374 | -0.10128 | -0.44245 | -0.14416 |
| Q00535 | Cyclin-dependent CDK5 CDKN      | -1.55497 | -1.62449 | -2.05565 | -1.9386  | -1.33313 | -1.79647 | -2.46713 | -2.24936 | -2.06756 | -2.06333 |
| Q00577 | Transcription PURA PUR1         | -1.74507 | -1.46529 | -1.88753 | -1.45317 | -2.27889 | -1.40823 | -1.53964 | -1.50155 | -0.89984 | -1.28276 |
| Q00610 | Clathrin heavy CLTC CLH1        | 0.155031 | 0.301509 | 0.112475 | 0.137504 | 0.18799  | -0.05571 | -0.01027 | 0.06882  | 0.206137 | 0.094215 |
| Q00613 | Heat shock HSF1 HSTF1           | -0.32496 | 0.030861 | -0.12199 | -0.30633 | -0.24236 | 0.105353 | -0.02061 | -0.01728 | 0.139217 | -0.15397 |
| Q00653 | Nuclear factor NFKB2 LYT1       | -0.87365 | -0.86073 | -0.90202 | -0.86821 | -0.73606 | -1.06711 | -0.97465 | -1.25348 | -0.81444 | -0.93934 |
| Q00688 | Peptidyl-protein FKBP3 FKBP     | 1.204081 | 1.30852  | 1.079719 | 1.062773 | 1.199289 | 1.01764  | 1.031024 | 1.13546  | 1.35018  | 1.346137 |
| Q00722 | 1-phosphatidyl PLCB2            | -0.06171 | -0.03967 | -0.16757 | -0.16644 | -0.32813 | -0.44072 | -0.30251 | -0.3101  | -0.40852 | -0.49556 |
| Q00765 | Receptor-like REEP5 C5orf       | 1.241754 | 1.395465 | 2.025552 | 1.816947 | 1.801505 | 1.63866  | 1.503299 | 1.461949 | 1.271161 | 0.963288 |
| Q00796 | Sorbitol dehydratase SORD       | -1.90243 | -1.10534 | -1.04194 | -1.02255 | -1.10958 | -1.14886 | -1.2237  | -1.22017 | -0.89157 | -0.76793 |
| Q00839 | Heterogeneous HNRNPU C          | 0.47587  | 0.656134 | 0.740082 | 0.643753 | 1.094432 | 0.869228 | 1.085776 | 0.82918  | 0.645983 | 0.70213  |
| Q01081 | Splicing factor U2AF1 U2AF      | 0.164906 | 0.90146  | 0.443563 | 0.630903 | 0.923649 | 0.344234 | 0.870222 | 0.60989  | 0.375786 | 0.528083 |
| Q01082 | Spectrin beta SPTBN1 SP         | 0.299939 | 0.471434 | -0.16086 | 0.008971 | -0.16528 | 0.130532 | -0.06274 | -0.08246 | 0.297201 | 0.379192 |
| Q01085 | Nucleolysin TIAL1               | -0.15335 | -0.73697 | 0.574527 | 0.589138 | 0.264273 | 0.555519 | 0.050273 | 0.061639 | 0.281771 | 0.362078 |
| Q01105 | Protein SETD SET                | 0.410039 | 0.931197 | 0.111175 | 0.136962 | 0.438495 | 0.093814 | 0.106657 | 0.358083 | 0.172574 | 0.321897 |
| Q01130 | Serine/arginine SRSF2 SFRS      | 1.56487  | 1.582427 | -0.02885 | -0.16216 | 0.206133 | -0.03457 | 0.768878 | 0.629334 | -0.11311 | 0.382491 |
| Q01196 | Runx-related RUNX1 AM           | -0.43756 | -0.32654 | 0.011337 | 0.069463 | -0.13952 | 0.113737 | -0.33607 | -0.16793 | 0.327025 | 0.354048 |
| Q01201 | Transcription RELB              | -1.76142 | -1.20552 | -1.17051 | -1.49159 | -1.27956 | -1.62391 | -1.62009 | -1.66158 | -1.3284  | -2.15485 |
| Q01415 | N-acetylgalactosyl GALK2 GK2    | 0.4975   | 0.414062 | 0.42862  | 0.685891 | 0.383081 | 0.825971 | 0.372201 | 0.050626 | 0        | 0.429349 |
| Q01432 | AMP deaminase AMPD3             | 0.674441 | 0.683969 | 0.5155   | 0.704338 | 0.776012 | 0.829198 | 0.453891 | 0.553185 | 1.032787 | 0.737766 |
| Q01433 | AMP deaminase AMPD2             | -0.64689 | -0.57864 | -0.2548  | -0.41923 | -0.01495 | -0.2962  | -0.46146 | -0.23462 | -0.18311 | -0.31531 |
| Q01459 | Di-N-acetyltransferase CTBS CTB | 0.644341 | 0.850161 | 0.944352 | 1.301715 | 0.460783 | 0.880418 | 0.866073 | 0.581141 | 0.108934 | 0.174834 |
| Q01469 | Fatty acid-binding FABP5        | -0.22533 | -0.36995 | -0.61252 | -0.89129 | -0.37563 | -0.63055 | -0.24233 | -0.12663 | -0.14378 | -0.07036 |
| Q01518 | Adenylyl cyclase CAP1 CAP       | 1.270089 | 1.349576 | 1.014153 | 1.246793 | 1.138365 | 1.43334  | 1.300601 | 1.574446 | 1.104496 | 1.022745 |
| Q01543 | Friend leukemia FLI1            | -0.44597 | -0.36985 | 0.159876 | -0.07458 | 0.114333 | 0.043443 | 0        | -0.19283 | -0.04683 | 0.11054  |
| Q01650 | Large neutral SLC7A5 CD         | 0.334001 | 0.763239 | 0.574527 | 0.609837 | 0.348454 | 0.652573 | -0.02061 | 0.241889 | -0.29739 | -0.37145 |
| Q01658 | Protein Dr1 DR1                 | -0.6787  | -0.71227 | -0.97145 | -1.0085  | -1.01619 | -1.19989 | -1.34894 | -1.09901 | -0.73241 | -0.57711 |
| Q01780 | Exosome component EXOSC10 P     | 0.383323 | 0.287044 | 0.423038 | 0.011834 | 0.355057 | 0.472145 | 0.055206 | 0.039528 | 0.474598 | 0.320744 |

|        |                                |          |          |          |          |          |          |          |          |          |          |
|--------|--------------------------------|----------|----------|----------|----------|----------|----------|----------|----------|----------|----------|
| Q01804 | OTU domain OTUD4 HIN           | -1.54709 | -1.21747 | -0.98975 | -1.7356  | -0.88744 | -1.34636 | -2.15252 | -2.20916 | -1.82811 | -1.70854 |
| Q01813 | ATP-dependen PFKF PFKF         | -0.64889 | -0.56825 | -0.29502 | -0.42115 | -0.47226 | -0.50228 | -0.54727 | -0.86528 | -1.09459 | -1.09134 |
| Q01826 | DNA-binding SATB1              | -1.58836 | -1.84765 | -2.13906 | -1.47045 | -1.57823 | -1.70454 | -1.76861 | -2.97728 | -1.76553 | -1.28264 |
| Q01831 | DNA repair XPC XPCC            | 1.070967 | 0.97443  | -0.27399 | 0.091148 | 0.564994 | 0.352211 | 0.384011 | 0.207595 | -0.45003 | 0.178749 |
| Q01844 | RNA-binding EWSR1 EW           | 0.980427 | 1.033832 | 0.853387 | 0.785569 | 0.635373 | 0.534157 | 0.755243 | 0.420045 | 0.95809  | 0.67832  |
| Q02040 | A-kinase ar AKAP17A C          | -0.14662 | -0.0039  | -0.57138 | -0.13813 | -0.00746 | -0.4975  | -0.07886 | -0.36995 | -0.37474 | -0.52218 |
| Q02083 | N-acylethyl NAAA ASA           | 0.575735 | 0.47173  | 0.546739 | 0.693825 | 0.104849 | 0.047394 | 0.478044 | 0.307648 | 0.197916 | 0.420317 |
| Q02086 | Transcription SP2 KIAAOC       | 0.51881  | 0.414062 | 0.817347 | 0.942413 | 0.859519 | 0.994525 | 0.749192 | 0.784271 | 0.907519 | 1.052151 |
| Q02127 | Dihydrooroc DHODH              | -0.94065 | -0.88144 | -1.30646 | -1.35553 | -1.33258 | -0.71043 | -1.09053 | -1.51532 | -1.39225 | -1.59077 |
| Q02218 | 2-oxoglutaric OGDH             | 0.626127 | 0.988117 | 0.939717 | 0.885904 | 0.525595 | 0.739145 | 0.861411 | 1.001219 | 0.576908 | 0.303306 |
| Q02252 | Methylmalonyl ALDH6A1 N        | 0.26     | 0.414062 | 0.049819 | -0.10402 | -0.5231  | -0.1315  | 0.426503 | 0.039528 | 0.470533 | -0.00888 |
| Q02338 | D-beta-hydroxy BDH1 BDH        | 0.761643 | 0.735501 | 0.123626 | 0.197356 | 0.216032 | 0.684918 | 0.361745 | 0.294443 | 0.157502 | -0.03148 |
| Q02446 | Transcription SP4              | -1.75821 | -1.82009 | -0.4195  | -0.82116 | -0.5015  | -0.70851 | -0.23266 | 0.061639 | -0.55072 | -0.6811  |
| Q02447 | Transcription SP3              | 0.716207 | 0.808469 | 0.697437 | 0.765535 | 1.079567 | 0.90105  | 0.877257 | 0.889966 | 0.676303 | 0.706554 |
| Q02543 | 60S ribosomal RPL18A           | 1.329184 | 1.403784 | 0.381508 | 0.171318 | 0.232977 | -0.01097 | 0.51866  | 0.187627 | 0.014075 | 0.251185 |
| Q02750 | Dual specific MAP2K1 M         | 0.875751 | 0.893778 | 1.279805 | 1.083762 | 1.449936 | 1.519574 | 0.979609 | 1.196866 | 1.279831 | 1.105178 |
| Q02790 | Peptidyl-protein FKBP4 FKBP    | 0.115621 | 0.175978 | 0.317241 | 0.646363 | 0.476903 | 0.661188 | 0.421575 | 0.416914 | 0.661475 | 0.690191 |
| Q02818 | Nucleobinc NUCB1 NU            | 0.224123 | -0.17823 | 0.246696 | 0.220599 | -0.50188 | 0.095157 | -0.32577 | -0.26992 | 0.117652 | 0.060663 |
| Q02878 | 60S ribosomal RPL6 TXRE        | 1.40439  | 1.467123 | 1.236803 | 1.155874 | 1.411314 | 1.486987 | 1.350297 | 1.404021 | 1.692998 | 1.438722 |
| Q02880 | DNA topoisomerase TOP2B        | 0.103242 | 0.165586 | 0        | 0        | 0.174874 | 0.037755 | 0.131912 | 0.126008 | 0.086908 | -0.03132 |
| Q02978 | Mitochondrial SLC25A11 S       | -0.77588 | -0.46529 | -1.08017 | -0.87971 | -1.35199 | -1.40054 | -1.01027 | -1.33342 | -1.45003 | -1.56737 |
| Q03164 | Histone-lysine KMT2A ALL       | -1.34023 | -1.94642 | -1.23451 | -1.82312 | -0.10806 | -0.47454 | -0.73773 | -1.80365 | -1.64127 | -1.48633 |
| Q03188 | Centromere CENPC CEN           | 0.749038 | 1.01165  | -1.16307 | -1.76147 | -1.05892 | -1.3352  | -1.83312 | -1.30153 | -1.47627 | -1.46894 |
| Q03252 | Lamin-B2 LMNB2 LM              | 0.226797 | 0.054945 | 0.693946 | 0.493208 | 0.766409 | 0.570147 | 0.680628 | 0.713038 | 0.88404  | 0.897172 |
| Q03518 | Antigen peptide TAP1 ABCB      | -0.11289 | 0.251125 | 0.040788 | -0.30041 | -1.34552 | -0.91401 | -0.12493 | -0.32768 | -1.26376 | -0.70939 |
| Q03519 | Antigen peptide TAP2 ABCB      | 0.395166 | 0.302933 | 0.278585 | -0.06003 | -0.90112 | -0.19878 | 0.156798 | 0.025111 | -0.48892 | -0.59485 |
| Q03701 | CCAAT/enhancer CEBPZ CBF       | 0.542457 | 0.630238 | -0.27135 | -0.53492 | 0.01073  | -0.13376 | -0.20134 | -0.43214 | -0.01517 | 0.018653 |
| Q04206 | Transcription factor RELA NFKB | -0.9803  | -0.69054 | -0.46188 | -0.23816 | -0.37109 | -0.12553 | -0.36476 | -0.25618 | -0.37534 | -0.41201 |
| Q04323 | UBX domain UBXN1 SAK           | -0.24762 | 0.037194 | 0.220163 | 0.120294 | 0.036712 | 0.208271 | 0.074768 | -0.07641 | 0.250407 | 0.0649   |
| Q04446 | 1,4-alpha-galactose GBE1       | 0.49599  | 0.39756  | 0.339141 | 0.568665 | 0.380122 | 0.680462 | 0.166437 | 0.281847 | 0.561993 | 0.589362 |
| Q04637 | Eukaryotic EIF4G1 EIF4         | 0.019433 | -0.12143 | 0.273059 | 0.175477 | -0.10027 | 0.110424 | 0.272617 | -0.11781 | -0.08277 | -0.0396  |
| Q04726 | Transducer TLE3 KIAA1          | -1       | -0.89476 | -0.35646 | -0.91475 | -0.63413 | -0.91511 | -0.73016 | -0.848   | -0.59918 | -0.48454 |
| Q04760 | Lactoylglutamate GLO1          | 1.531026 | 1.587577 | 1.718913 | 1.584035 | 1.406642 | 1.393385 | 1.586696 | 1.032168 | 1.615979 | 1.535629 |



|        |                               |          |          |          |          |          |          |          |          |          |          |
|--------|-------------------------------|----------|----------|----------|----------|----------|----------|----------|----------|----------|----------|
| Q04837 | Single-strand SSBP1 SSBF      | 0.292917 | -0.00639 | 0.176811 | 0.595802 | 0.52937  | 1.232015 | 0.38873  | 0.994639 | 0.969022 | 0.490132 |
| Q04864 | Proto-oncogene REL            | -1.69225 | -1.62529 | -1.26047 | -1.74627 | -0.05302 | 0.069348 | -0.97929 | -1.76441 | -1.62803 | -1.10355 |
| Q04917 | 14-3-3 protein YWHAH YW       | 0.552195 | 0.615891 | 0.10024  | -0.06344 | 0.172397 | 0.327339 | 0.130741 | 0.284148 | -0.04644 | 0.00132  |
| Q04941 | Proteolipid PLP2 A4           | -0.5285  | -0.32193 | -0.81251 | -0.65519 | -1.56134 | -0.36989 | -0.4566  | -0.45814 | -1.26203 | -1.26236 |
| Q05048 | Cleavage site CSTF1           | -1.87245 | -1.38163 | -2.11454 | -1.61667 | -1.15697 | -1.37197 | -1.69661 | -1.63743 | -1.68753 | -1.3375  |
| Q05086 | Ubiquitin-protein UBE3A E6A   | -0.39497 | -0.45457 | -0.57274 | -0.69574 | -0.72955 | -0.47454 | -0.57447 | -0.46212 | -0.4635  | -0.68339 |
| Q05193 | Dynamamin-1 DNMI DNMI         | 2.031478 | 2.164717 | 2.264658 | 2.409539 | 2.18799  | 2.404755 | 2.287761 | 2.284815 | 2.175154 | 2.104542 |
| Q05209 | Tyrosine-protein PTPN12       | 0.229304 | 0.298341 | 0.034673 | 0.187933 | -0.01495 | -0.30968 | -0.07886 | -0.0115  | -0.22948 | -0.40036 |
| Q05315 | Galectin-1C CLC LGALS1        | 2.211091 | 2.364951 | 2.079643 | 2.148863 | 3.370193 | 3.271322 | 1.931911 | 1.688056 | 2.382857 | 2.168941 |
| Q05519 | Serine/arginine SRSF11 SFR    | -0.03722 | 0.255244 | 0.881646 | 0.512711 | 0.356727 | 0.458199 | 0.318422 | 0.275529 | 0.626305 | 0.49198  |
| Q05655 | Protein kinase PRKCD          | 0.969368 | 0.670742 | -2.05029 | -1.88364 | -1.17404 | -1.52425 | -1.20293 | -1.9661  | -1.8875  | -2.3291  |
| Q05D32 | CTD small fragment CTDSPL2 H  | -1.28011 | -1.61252 | -0.73748 | -0.9586  | -0.87346 | -1.11037 | -0.68052 | -0.57868 | -2.42428 | -2.18593 |
| Q06124 | Tyrosine-protein PTPN11 PT    | 0.192645 | 0.396397 | 0.2824   | 0.314381 | 0.065423 | 0.165059 | 0.235488 | 0.289507 | 0.304855 | 0.077537 |
| Q06203 | Amidophosphatase PPAT GPAT    | -0.666   | -0.36146 | 0.172522 | 0.476438 | 0.14828  | 0.459432 | -0.0574  | 0.152003 | 0.523972 | 0.889677 |
| Q06210 | Glutamine-fructose GFPT1 GFA  | -1.1004  | -0.81028 | -0.60064 | -0.74746 | -0.19903 | -0.88452 | -0.66382 | -0.65535 | -0.89984 | -1.0268  |
| Q06265 | Exosome component EXOSC9 PM   | 0.899598 | 0.956459 | 0.682938 | 0.421296 | 0.154975 | 0.250227 | 0.204745 | 0.067114 | 0.342525 | 0.67364  |
| Q06323 | Proteasome PSME1 IFI5         | 1.036362 | 1.209464 | 1.235746 | 1.373678 | 0.887927 | 0.686925 | 1.235488 | 1.207595 | 1.210218 | 1.31305  |
| Q06330 | Recombinant RBPJ IGTKR        | -3.37126 | -2.48699 | -3.88753 | -4.38606 | NA       | NA       | -3.43911 | -2.88982 | -3.1281  | -3.64829 |
| Q06546 | GA-binding GABPA E4T          | -0.27277 | -0.01175 | -0.36146 | -0.11078 | -0.03767 | -0.5366  | -0.3322  | -0.36995 | -0.2916  | 0.081724 |
| Q06547 | GA-binding GABPB1 E4          | -1.34869 | -1.26359 | -1.79873 | -1.44121 | -1.38888 | -1.85227 | -0.99454 | -1.7549  | -1.73076 | -1.25761 |
| Q06587 | E3 ubiquitin RING1 RNF        | -0.70516 | -0.54556 | -0.66307 | -0.44661 | -0.09221 | -0.53762 | -0.42821 | -0.35025 | -0.89107 | -1.08194 |
| Q06787 | Synaptic function FMR1        | -2.35109 | -1.28345 | -1.1305  | -1.27563 | -1.26006 | -1.33015 | -1.03103 | -1.2091  | -0.87368 | -0.73402 |
| Q07002 | Cyclin-dependent CDK18 PCT    | -1.06193 | -1.10512 | -0.6734  | -1.65567 | -0.9852  | -0.57679 | -0.65574 | -1.05842 | -0.78165 | -0.89752 |
| Q07020 | 60S ribosome RPL18            | -0.40143 | -0.475   | 1.013583 | 1.024875 | 1.040332 | 0.991779 | 1.200299 | 0.833292 | 0.688056 | 1.021959 |
| Q07021 | Compleme C1QBP GC1            | 0.139487 | 0.308651 | -0.25703 | -0.27465 | 0.640419 | 0.667685 | 0.428123 | 0.598872 | 0.447146 | 0.636875 |
| Q07065 | Cytoskeleton CKAP4            | -0.85616 | -0.99222 | -1.1305  | -1.26178 | -1.06075 | -0.94456 | -1.20514 | -0.80472 | -1.22502 | -0.90578 |
| Q07666 | KH domain KHDRBS1 S           | -0.88359 | 0.286237 | 0.451736 | 0.286456 | 0.462471 | 0.356485 | 0.518523 | 0.177538 | 0.009399 | 0.448933 |
| Q07812 | Apoptosis regulator BAX BCL2L | 0.677641 | 0.119244 | -0.39726 | -0.43486 | -0.73528 | 0.089024 | -0.0274  | -0.23811 | -0.73537 | -0.66411 |
| Q07866 | Kinesin light KLC1 KLC K      | 0.839892 | 0.794397 | 1.10343  | 0.758136 | 0.970342 | 1.040363 | 0.898086 | 0.913221 | 0.976232 | 0.863439 |
| Q07889 | Son of seven SOS1             | -0.02445 | -0.23676 | -0.23217 | -0.2909  | -0.23359 | -0.62654 | -0.3322  | -0.71049 | -0.53629 | -0.15397 |
| Q07955 | Serine/arginine SRSF1 ASF     | 0.670829 | 0.663569 | -0.07606 | -0.33344 | -0.26031 | -0.32498 | -0.23614 | -0.23317 | 0.002461 | 0.130984 |
| Q07960 | Rho GTPase ARHGAP1 C          | 0.743363 | 1.008087 | 0.913454 | 0.939812 | 0.48755  | 0.721906 | 0.664403 | 0.744459 | 0.397097 | 0.604717 |
| Q08170 | Serine/arginine SRSF4 SFRS    | -0.45187 | -0.29298 | -1.12199 | -0.62632 | -0.28703 | -0.74061 | -0.7217  | -0.78746 | -0.76683 | -0.75606 |

|        |                        |          |          |          |          |          |          |          |          |          |          |
|--------|------------------------|----------|----------|----------|----------|----------|----------|----------|----------|----------|----------|
| Q08209 | Serine/thre PPP3CA CA  | -0.03063 | -0.29298 | 0.323487 | 0.049328 | 0.294905 | 0.490881 | -0.30035 | -0.04654 | 0.060025 | 0.052151 |
| Q08211 | ATP-depen DHX9 DDX5    | -0.04967 | 0.145825 | -0.43335 | -0.56937 | -0.23002 | -0.34837 | -0.25696 | -0.47743 | -0.54004 | -0.26127 |
| Q08257 | Quinone o> CRYZ        | -0.18746 | 0.259781 | -0.33662 | -0.31411 | -0.06075 | -0.1375  | 0.030374 | -0.10732 | 0.313541 | 0.36306  |
| Q08378 | Golgin subf GOLGA3     | -0.59104 | -0.28974 | -0.20945 | -0.22127 | -0.19231 | -0.17403 | -0.51303 | -0.553   | -0.20374 | -0.04735 |
| Q08379 | Golgin subf GOLGA2     | -1.91754 | -1.4761  | -1.34427 | -1.98751 | -1.59991 | -1.40054 | -1.96546 | -1.65113 | -2.10073 | -1.54137 |
| Q08722 | Leukocyte : CD47 MERG  | -0.37727 | -0.43389 | 0.307127 | 0.077488 | -0.19674 | -0.20071 | 0.056909 | 0.151994 | 0.379901 | 0.02942  |
| Q08752 | Peptidyl-pr PPID CYP4C | -0.24334 | -0.16657 | -0.07209 | -0.02531 | 0.117564 | 0.188939 | 0.008683 | 0.044757 | 0.13493  | 0.03065  |
| Q08881 | Tyrosine-pr ITK EMT LY | 0.777608 | 0.477047 | 0.633525 | 0.354182 | -0.28703 | 0.304334 | 0.384011 | -0.36995 | 0.143492 | -0.01781 |
| Q08945 | FACT comp SSRP1 FAC    | -0.85042 | -0.57138 | -0.92405 | -0.3377  | -1.04532 | -0.18641 | -0.38466 | -0.60224 | -0.91754 | -0.77887 |
| Q08999 | Retinoblast RBL2 RB2   | -0.90613 | -1.26459 | -0.97679 | -1.0126  | -0.74193 | -1.02203 | -0.86343 | -1.05842 | -0.77357 | -0.95677 |
| Q08AF3 | Schlafen fa SLFN5      | -0.15335 | -0.10932 | -0.36647 | -0.22344 | -0.37109 | -0.37906 | -0.22069 | -0.05842 | -0.62803 | -0.47221 |
| Q08AM6 | Protein VA VAC14 TAX   | -0.53182 | -0.4983  | -0.15453 | -0.39451 | -0.48791 | -0.31798 | -0.43214 | -0.56814 | -0.25776 | -0.17383 |
| Q08J23 | RNA cytosil NSUN2 SAK  | 0.332254 | 0.266189 | 0.123847 | 0.283733 | 0.116321 | 0.335284 | 0.1811   | 0.230495 | 0.259474 | -0.10085 |
| Q09028 | Histone-bir RBBP4 RBA  | -0.77385 | -0.50476 | -0.28342 | -0.52808 | -0.62951 | -0.62263 | -0.59503 | -0.50781 | -0.34208 | 0.027946 |
| Q09161 | Nuclear ca; NCBP1 CBP  | -0.2238  | -0.03061 | -0.34549 | -0.29741 | -0.25813 | -0.2735  | -0.29978 | -0.0751  | -0.21153 | 0.041271 |
| Q09472 | Histone ac; EP300 P300 | -1.89482 | -2.05565 | -2.07195 | -1.56009 | -2.55552 | -2.91511 | -1.9301  | -2.88982 | -1.57089 | -1.38294 |
| Q09666 | Neuroblast AHNAK PM    | 0.836501 | 0.944352 | 1.241743 | 1.137627 | 0.826352 | 0.765071 | 0.896622 | 0.879608 | 0.323813 | 0.258602 |
| Q0VD83 | Apolipopro APOBR APC   | -0.83462 | -0.79826 | -0.2898  | -0.3804  | -0.7051  | -0.54455 | -0.71956 | -0.85036 | -0.96075 | -1.15388 |
| Q0VDF9 | Heat shock HSPA14 HS   | -0.78629 | -0.99222 | -0.4021  | -0.32979 | -0.47063 | -0.42968 | -0.47422 | -0.24257 | -0.20754 | -0.54783 |
| Q10471 | Polypeptid; GALNT2     | 0        | -0.2185  | -0.25061 | 0.182416 | -0.42    | -0.26961 | 0.117836 | -0.00574 | -0.59918 | -0.54783 |
| Q10567 | AP-1 comp AP1B1 ADT    | -1.53086 | -1.28405 | -1.68726 | -2.32329 | -3.00697 | -1.31158 | -1.46768 | -1.76994 | -1.97484 | -2.62106 |
| Q10570 | Cleavage al CPSF1 CPSF | -0.91754 | -0.78319 | -0.92405 | -0.90374 | -0.49317 | -1.16175 | -0.83415 | -0.78382 | -0.86507 | -0.53088 |
| Q10589 | Bone marr; BST2        | 0.20847  | 0.52661  | 0.288798 | 0.724366 | 0.258068 | 0.529253 | 0.475158 | 0.289507 | 0.108934 | 0.422761 |
| Q10713 | Mitochond PMPCA INF    | -0.58649 | -0.37141 | -0.4127  | -0.9582  | -0.83197 | -0.55716 | -0.60567 | -0.17275 | -0.34993 | -0.46968 |
| Q11201 | CMP-N-ace ST3GAL1 SI   | -1.74507 | -0.81714 | -1.06378 | -0.89129 | -3.07635 | -2.02203 | -1.39808 | -1.48543 | -1.65748 | -0.99118 |
| Q12765 | Secernin-1 SCRNI1 KIAA | -0.13327 | 0.053581 | -0.07605 | -0.55087 | 1.083082 | 1.133025 | 0.588369 | 0.673772 | 0.349942 | 0.182653 |
| Q12769 | Nuclear po NUP160 KIAA | -0.76062 | -0.82035 | -1.39216 | -1.47328 | -2.64572 | -1.04062 | -1.39808 | -1.51785 | -1.46879 | -1.44591 |
| Q12770 | Sterol regu SCAP KIAA  | -2.76553 | -2.20945 | -1.6734  | -1.89129 | -1.71727 | -3.79647 | -2.16227 | -1.24936 | -1.9906  | -1.34873 |
| Q12778 | Forkhead b FOXO1 FKH   | -1.89482 | -2.12199 | -1.81714 | -3.32193 | -1.79256 | -1.81558 | -1.55459 | -2.14439 | -1.31487 | -0.83303 |
| Q12788 | Transducin TBL3 SAZD   | -1.06617 | -1.13786 | -1.62454 | -1.31489 | -1.63537 | -1.51032 | -1.23326 | -1.54351 | -1.2469  | -1.32083 |
| Q12792 | Twinfilin-1 TWF1 PTKS  | -4.08746 | -3.4021  | -1.43335 | -1.8011  | -3.79256 | -1.95693 | -1.58496 | -2.1193  | -1.73383 | -1.73402 |
| Q12802 | A-kinase ar AKAP13 BR  | -1.34506 | -1.17383 | -0.65488 | -0.94262 | -0.98641 | -0.58562 | -0.75585 | -0.76878 | -0.8002  | -0.51584 |
| Q12824 | SWI/SNF-r; SMARCB1 E   | 0.229304 | 0.510278 | -0.17823 | -0.12439 | -0.14048 | 0.184425 | 0.122543 | 0.141661 | 0.281771 | -0.09134 |

|        |                         |          |          |          |          |          |          |          |          |          |          |
|--------|-------------------------|----------|----------|----------|----------|----------|----------|----------|----------|----------|----------|
| Q12830 | Nucleosom BPTF FAC1     | -0.67565 | -0.86605 | -0.7176  | -1.06413 | -1       | -1.31647 | -1.28157 | -1.03477 | -0.69515 | -1.36004 |
| Q12846 | Syntaxin-4 STX4 STX4    | -0.10126 | -0.10464 | -0.34672 | -0.70623 | 0.236571 | 0.279887 | -0.18781 | -0.10668 | 0.000412 | -0.41373 |
| Q12849 | G-rich sequ GRSF1       | -1.04933 | -1.02359 | -1.17383 | -1.21613 | -0.79256 | -0.52869 | -0.9301  | -0.43812 | -0.36864 | -0.50952 |
| Q12851 | Mitogen-ac MAP4K2 G     | -1.96997 | -1.28336 | -1.52833 | -2.15307 | -1.43022 | -0.98375 | -1.55357 | -1.75378 | -1.80052 | -1.32981 |
| Q12857 | Nuclear fac NFIA KIAA1  | -0.03684 | 0.112475 | -0.01963 | -0.03814 | 0.154975 | 0.308753 | 0.248466 | 0.187627 | 0.517399 | 0.484162 |
| Q12872 | Splicing fac SFSWAP SF  | -3.00907 | -1.83805 | -2.01639 | -1.55102 | -1.85399 | -2.84824 | -2.62837 | -3.07039 | -2.45929 | -1.9901  |
| Q12873 | Chromodol CHD3          | 0.714237 | 0.889592 | 0.48689  | 0.319417 | 0.498989 | 0.155278 | 0.455782 | 0.050626 | 0.652473 | 0.413709 |
| Q12874 | Splicing fac SF3A3 SAP  | 0.47587  | 0.431515 | 0.532014 | 0.319417 | 0.114333 | 0.381871 | 0.536406 | 0.581141 | 0.702614 | 0.73608  |
| Q12882 | Dihydropyr DPYD         | -0.00126 | 0.212888 | 0.114833 | 0.042431 | 0.021842 | 0.372415 | -0.10008 | 0.083163 | 0.300586 | 0.209566 |
| Q12888 | TP53-bindii TP53BP1     | -0.93339 | -0.83094 | -0.45929 | -0.59751 | -0.66882 | -0.48026 | -0.65978 | -0.64163 | -0.60956 | -0.54466 |
| Q12893 | Transmeml TMEM115       | -0.89482 | -0.85896 | -0.52576 | -0.5881  | -0.56649 | -0.71348 | -0.68012 | -0.76783 | -0.4119  | -0.35437 |
| Q12894 | Interferon- IFRD2       | -0.5025  | -0.44392 | -0.85896 | -1.40255 | -0.81855 | -0.85457 | -0.82667 | -0.53434 | -0.78978 | -1.06333 |
| Q12899 | Tripartite n TRIM26 RN  | 0.24984  | 0.038474 | 0.130397 | -0.38606 | -0.34252 | -0.04439 | 0.182377 | -0.05842 | -0.09248 | 0.273324 |
| Q12904 | Aminoacyl AIMP1 EM      | -0.63743 | -0.53703 | -0.18265 | -0.35364 | -0.38074 | -0.14353 | -0.41163 | -0.1635  | 0.238467 | -0.01781 |
| Q12905 | Interleukin ILF2 NF45 F | -0.14751 | -0.26259 | -1.36172 | -0.56443 | -1.10478 | -0.44525 | -0.36328 | -0.48261 | -0.2405  | -0.78239 |
| Q12906 | Interleukin ILF3 DRBF I | 0.302439 | 0.504792 | 0.380031 | 0.313206 | 0.46346  | 0.469267 | 0.273165 | 0.478041 | 0.637674 | 0.813663 |
| Q12907 | Vesicular ir LMAN2 C5   | 0.902844 | 0.749389 | 0.332805 | 0.309328 | 0.539639 | 0.592231 | 0.356304 | 0.371448 | 0.177987 | 0.074727 |
| Q12912 | Inositol 1,4 IRAG2 JAW  | 0.308002 | 0.239492 | 0.490303 | 0.687449 | 0.454206 | 0.476906 | 0.755231 | 0.621396 | -0.16143 | 0.338622 |
| Q12913 | Receptor-t PTPRJ DEP    | -1.32209 | -0.87567 | -1.21103 | -1.08371 | -2.76017 | -1.61211 | -0.97859 | -1.06069 | -1.96561 | -1.85688 |
| Q12931 | Heat shock TRAP1 HSP    | 0.624818 | 0.702238 | 0.240108 | 0.067399 | 0.070777 | 0.286523 | 0.364274 | 0.241889 | 0.517399 | 0.458627 |
| Q12933 | TNF recept TRAF2 TRA    | -2.80986 | -2.49297 | -1.63784 | -1.32287 | -2.47358 | -2.03669 | -1.56167 | -2.14306 | -1.53825 | -1.61416 |
| Q12955 | Ankyrin-3 ( ANK3        | -2.80735 | -2.05565 | -2.48699 | -3.0906  | -2.39046 | -2.95693 | -1.69661 | -1.82753 | -1.3505  | -2.06333 |
| Q12959 | Disks large DLG1        | 0.685025 | 0.606416 | 1.116449 | 0.86213  | 1.102723 | 1.060397 | 0.925288 | 0.657241 | 1.137484 | 1.331543 |
| Q12962 | Transcripti TAF10 TAF   | -0.71491 | -0.46529 | -0.38163 | -0.90298 | -0.25118 | -0.39334 | -0.45305 | -0.2091  | -0.14886 | -0.0223  |
| Q12972 | Nuclear inh PPP1R8 AR   | 0.384243 | 0.432091 | 0.645261 | 0.548461 | 0.357467 | 0.35641  | 0.467594 | 0.444883 | 0.414465 | 0.504183 |
| Q12974 | Protein tyr PTP4A2 PR   | -0.19438 | 0.363436 | 0.112475 | -0.14505 | 0.065423 | 0.273018 | 0.26984  | 0.35811  | -0.1913  | 0.060663 |
| Q12979 | Active brea ABR         | -2.57289 | -1.49796 | -1.80346 | -2.84549 | -3.07635 | -2.11366 | -1.7997  | -1.93289 | -2.06756 | -1.92246 |
| Q12982 | BCL2/aden BNIP2 NIP2    | 0.442403 | 0.074182 | 0.148399 | 0.014846 | -0.08479 | 0.259531 | -0.18012 | 0.288015 | 0.08591  | -0.18624 |
| Q12986 | Transcripti NFX1 NFX2   | 0.229304 | 0.821765 | 0.863081 | 1.049328 | 1.161638 | 0.683526 | 0.937264 | 0.666576 | 0.622195 | 0.480995 |
| Q12996 | Cleavage st CSTF3       | -1.01003 | -0.9845  | -0.8499  | -0.94673 | -1.27514 | -0.9997  | -1.09084 | -1.22915 | -1.00603 | -0.82344 |
| Q13009 | T-lymphorr TIAM1        | 0.382656 | 0.40344  | 0.940862 | 0.831523 | 0.712906 | 0.780016 | 0.566878 | 0.717645 | 0.624789 | 0.681604 |
| Q13011 | Delta(3,5)-I ECH1       | -0.75575 | -0.60985 | -0.66535 | -0.66739 | -0.46145 | -0.77624 | -0.48382 | -0.37639 | -0.57512 | -0.31258 |
| Q13042 | Cell divisioi CDC16 AN  | 0.116409 | -0.2185  | -0.33171 | -0.50564 | 0.029444 | 0.037755 | -0.15656 | 0.131245 | -0.40564 | -0.04952 |

|        |              |         |       |          |          |          |          |          |          |          |          |          |          |          |
|--------|--------------|---------|-------|----------|----------|----------|----------|----------|----------|----------|----------|----------|----------|----------|
| Q13043 | Serine/thre  | STK4    | KRS2  | 0.681627 | 0.735325 | 0.626308 | 0.280935 | 0.086588 | 0.250227 | 0.368243 | 0.34915  | 0.546743 | 0.419456 |          |
| Q13045 | Protein flig | FLII    | FLIL  | -0.16876 | -0.24807 | 0.181901 | -0.47076 | 0.095172 | 0.162023 | -0.01488 | 0.164445 | -0.1568  | -0.21655 |          |
| Q13049 | E3 ubiquitin | TRIM32  | HT    | -1.666   | -1.58887 | -0.90933 | -1.10402 | -1.03006 | -1.37197 | -1.66382 | -1.61973 | -1.55695 | -1.51584 |          |
| Q13057 | Bifunctional | COASY   | PSE   | -0.81939 | -1.04399 | -0.65019 | -0.9348  | -1.10726 | -0.68446 | -1.12832 | -2.16993 | -1.21366 | -0.84943 |          |
| Q13077 | TNF recept   | TRAF1   | EBI6  | 0.155031 | 0.641046 | 0.972444 | 1.027954 | 0.609541 | 0.652573 | -0.00513 | 0.51056  | 0.06454  | 0.131052 |          |
| Q13084 | 39S ribosom  | MRPL28  | M     | 1.265054 | 1.27919  | 1.213452 | 0.977877 | 0.954676 | 0.972414 | 1.079617 | 0.994264 | 0.973833 | 0.936674 |          |
| Q13094 | Lymphocyt    | LCP2    |       | 1.415795 | 0.56354  | 0.99421  | 0.899544 | 0.54059  | 0.834779 | 0.714987 | 0.601566 | 0.856068 | 0.729348 |          |
| Q13098 | COP9 signa   | GPS1    | COPS  | 0.213707 | 0.165586 | -0.22728 | -0.3111  | -0.24236 | -0.40777 | -0.19704 | -0.34726 | -0.14631 | 0.166972 |          |
| Q13107 | Ubiquitin c  | USP4    | UNP   | -0.86139 | -0.39183 | -0.24136 | -0.26053 | -0.38074 | -0.44448 | -0.51019 | -0.74846 | -0.5824  | -0.51784 |          |
| Q13123 | Protein Rec  | IK      | RED   | RER      | -0.47056 | -0.64025 | -0.00143 | -0.47959 | -0.00469 | -0.14958 | -0.34264 | -0.1543  | -0.31197 | -0.01075 |
| Q13126 | S-methyl-5   | MTAP    | MSA   | -1.00254 | -0.69195 | -0.61819 | -1.06446 | -0.7408  | -0.62922 | -1.45578 | -0.90768 | -0.00447 | 0.369259 |          |
| Q13131 | 5'-AMP-act   | PRKAA1  | AM    | -2.89482 | -3.72403 | -2.4021  | -4.03814 | -3.27798 | -4.1375  | -2.89162 | -2.848   | NA       | NA       |          |
| Q13144 | Translation  | EIF2B5  | EIF2  | 0.18315  | 0.34074  | 0.23672  | 0.13477  | -0.01872 | 0.252917 | 0.137906 | 0.06073  | 0.066417 | 0.179265 |          |
| Q13148 | TAR DNA-b    | TARDBP  | TD    | 0.395201 | 0.416986 | 0.800651 | 0.470106 | 0.675844 | 0.366468 | 0.38247  | 0.31279  | 0.387189 | 0.448901 |          |
| Q13151 | Heterogen    | HNRNPA0 | I     | 0.907546 | 0.755306 | 0.690145 | 0.791891 | 0.868164 | 0.691574 | 0.957707 | 0.684576 | 1.11351  | 1.184176 |          |
| Q13153 | Serine/thre  | PAK1    |       | -1.46855 | -1.49796 | -1.17383 | -1.52356 | -1.79256 | -1.42968 | -1.74723 | -1.48543 | -1.33852 | -1.40621 |          |
| Q13155 | Aminoacyl    | AIMP2   | JTV   | 0.220858 | -0.04176 | -0.29337 | -0.16515 | 0.241475 | -0.11051 | 0.248742 | -0.07696 | 0.040445 | 0.025814 |          |
| Q13162 | Peroxiredo   | PRDX4   |       | 0.701329 | 0.699418 | 0.82397  | 0.968288 | 0.014797 | 0.360954 | 0.498856 | 0.690193 | 0.667425 | 0.31305  |          |
| Q13164 | Mitogen-ac   | MAPK7   | BM    | 1.078818 | 1.058244 | 0.927538 | 0.719453 | 0.746463 | 0.766739 | 0.867312 | 0.834914 | 0.698255 | 0.916566 |          |
| Q13177 | Serine/thre  | PAK2    |       | 0.110807 | 0.030861 | 0.445898 | 0        | 0.354283 | -0.0902  | 0.204745 | 0.227291 | 0.467126 | 0.576084 |          |
| Q13185 | Chromobo     | CBX3    |       | 1.171271 | 1.053581 | 1.352789 | 1.262217 | 1.354283 | 0.883384 | 1.31166  | 0.911463 | 1.084687 | 1.253311 |          |
| Q13190 | Syntaxin-5   | STX5    | STX5/ | 0.436099 | 0.259781 | -0.0516  | 0.225972 | -0.53382 | 0.208271 | -0.04679 | -0.2978  | -0.55695 | -0.52855 |          |
| Q13200 | 26S protea   | PSMD2   | TR/   | 0.632659 | 0.69262  | 1.116711 | 0.914773 | 1.039297 | 0.807355 | 0.811715 | 0.935177 | 0.816754 | 0.841781 |          |
| Q13206 | Probable A   | DDX10   |       | -3.5446  | -2.89187 | -1.88753 | -1.59756 | -2.82647 | -2.5127  | -2.96963 | -1.60224 | -2.68156 | -2.81737 |          |
| Q13217 | DnaJ homo    | DNAJC3  | P5    | -0.03063 | -0.0516  | 0.345135 | 0.471923 | -0.19903 | 0.005454 | -0.09516 | -0.07641 | -0.1913  | -0.20407 |          |
| Q13227 | G protein p  | GPS2    |       | -0.16011 | -0.27872 | 0.169058 | 0.067399 | -0.29613 | -0.05004 | -0.25081 | -0.03477 | 0.152003 | -0.18886 |          |
| Q13242 | Serine/argi  | SRSF9   | SFRS  | -0.9523  | -0.65486 | -1.03154 | -1.14505 | -1.11666 | -1.1618  | -0.90115 | -0.38482 | -0.83954 | -0.42392 |          |
| Q13243 | Serine/argi  | SRSF5   | HRS   | 0.6203   | 0.787384 | 0.830236 | 0.619659 | 0.866368 | 0.576388 | 1.015957 | 0.885789 | 0.972976 | 1.112738 |          |
| Q13247 | Serine/argi  | SRSF6   | SFRS  | 1.231938 | 1.225096 | 1.332943 | 0.947858 | 1.350874 | 0.940594 | 1.081893 | 1.138179 | 1.711721 | 1.45804  |          |
| Q13257 | Mitotic spii | MAD2L1  | M     | -1.02445 | -1.19153 | -1.17383 | -0.47917 | -1.62263 | -0.90484 | -1.06274 | -1.93289 | -1.45003 | -1.31531 |          |
| Q13263 | Transcripti  | TRIM28  | KA    | -0.74659 | -0.46253 | 0.03191  | -0.40324 | -0.47063 | 0.090032 | 0.038787 | -0.02285 | 0.36209  | 0.202467 |          |
| Q13283 | Ras GTPase   | G3BP1   | G3E   | -0.96408 | -1.23676 | -1.14768 | -1.07731 | -0.87933 | -1.0723  | -1.13955 | -1.22239 | -0.78978 | -1.0268  |          |
| Q13287 | N-myc-inte   | NMI     |       | -0.37126 | -0.22304 | 0.249978 | 0.114512 | -0.01495 | -0.1315  | 0.079617 | 0.573467 | 0.787006 | 0.860725 |          |

|        |              |              |          |          |          |          |          |          |          |          |          |          |
|--------|--------------|--------------|----------|----------|----------|----------|----------|----------|----------|----------|----------|----------|
| Q13303 | Voltage-ga   | KCNAB2 KC    | 2.810815 | 2.786031 | 1.63101  | 2.651364 | 1.482236 | 2.457443 | 2.417912 | 2.172467 | 1.860255 | 1.932043 |
| Q13310 | Polyadenyl   | PABPC4 AP    | 0.211031 | 0.249248 | 0.05492  | -0.1493  | 0.054683 | 0.233515 | 0.128861 | -0.01567 | -0.08149 | -0.1169  |
| Q13315 | Serine-prot  | ATM          | 0.371969 | 0.574527 | -0.83616 | -0.89723 | 0.164375 | 0.092649 | -0.39808 | -0.63743 | 0.099842 | 0.382659 |
| Q13325 | Interferon-  | IFIT5 ISG58  | 0.408963 | 0.529314 | -0.18709 | 0.160134 | -0.54463 | 0.079727 | 0.045324 | 0.146841 | -0.13845 | -0.32082 |
| Q13330 | Metastasis   | MTA1         | 0.883259 | 0.76094  | 0.566651 | 0.630243 | 1.040332 | 0.96123  | 1.113114 | 1.112832 | 1.199993 | 1.223024 |
| Q13342 | Nuclear bo   | SP140 LYSF   | -1.40296 | -1.68589 | -1.5656  | -1.61667 | -3.2076  | -1.9783  | -1.89162 | -2.848   | -1.91754 | -1.71937 |
| Q13347 | Eukaryotic   | EIF3I EIF3S  | 0.343587 | 0.45446  | 0.149828 | 0.180412 | 0.127221 | 0.224185 | 0.131866 | 0.287649 | 0.276545 | 0.197485 |
| Q13356 | RING-type    | PPIL2        | 0.269489 | 0.382445 | 0.563897 | 0.148938 | 0.456668 | 0.500339 | 0.358992 | 0.681944 | 0.710767 | 0.345697 |
| Q13363 | C-terminal-  | CTBP1 CTB    | -0.20133 | -0.07605 | 0.206872 | 0.615292 | 0        | 0.277534 | 0.681626 | 0.596765 | 0.206137 | 0.461377 |
| Q13370 | cGMP-inhik   | PDE3B        | -1.5025  | -1.00782 | -0.86605 | -1.40255 | -1.42999 | -0.75899 | -1.45305 | -1.30485 | -1.5025  | -0.77887 |
| Q13371 | Phosducin-   | PDCL PHLO    | 0.047697 | -0.27399 | 0.23017  | 0.031027 | 0.31895  | -0.16788 | 0.274077 | 0.039528 | 0.152003 | 0.334266 |
| Q13404 | Ubiquitin-c  | UBE2V1 CR    | 0.309753 | 0.108863 | -1       | -0.23078 | -0.51245 | 0.227069 | 0.299241 | -0.35523 | -0.36864 | -0.49698 |
| Q13405 | 39S ribosor  | MRPL49 C1    | -0.1004  | 0        | 0.408198 | 0.363963 | -0.05302 | 0.540568 | 0.282513 | 0.427862 | 0.487446 | 0.593786 |
| Q13409 | Cytoplasmic  | DYNC1I2 D    | -0.411   | -0.25061 | -0.25992 | -0.39428 | -0.62263 | -0.1375  | -0.50293 | -0.2091  | -0.05772 | 0.026311 |
| Q13418 | Integrin-lin | ILK ILK1 ILK | 1.228003 | 0.95172  | 1.213382 | 1.216944 | 1.160404 | 1.263625 | 1.097412 | 1.186167 | 0.609113 | 0.590127 |
| Q13422 | DNA-bindir   | IKZF1 IK1 IK | -1.0777  | -1.01568 | -0.7176  | -1.50564 | -1.06075 | -0.73151 | -1.03103 | -1.03477 | -0.83954 | -1.00888 |
| Q13423 | NAD(P) tra   | NNT          | 0.734046 | 0.819515 | 0.417591 | 0.32947  | 0.029444 | 0.037784 | 0.297507 | 0.15658  | 0.095698 | 0.004176 |
| Q13426 | DNA repair   | XRCC4        | -0.65436 | -0.30636 | -0.40718 | -0.54012 | -0.47833 | -0.11574 | 0.075414 | -0.09648 | -0.00343 | -0.0773  |
| Q13427 | Peptidyl-pr  | PPIG         | -1.06193 | -0.65486 | -0.80462 | -0.84831 | -0.58986 | -0.9698  | -0.54709 | -0.46623 | -0.50711 | -0.7414  |
| Q13428 | Treacle prc  | TCOF1        | -0.05905 | -0.05364 | -0.00135 | -0.14507 | 0.28883  | 0.394398 | 0.11073  | 0.112636 | 0.297201 | 0.337258 |
| Q13435 | Splicing fac | SF3B2 SAP    | -0.21159 | 0.013116 | 0.295167 | 0.167664 | 0.285238 | 0.094962 | -0.08158 | 0.07507  | 0.28352  | 0.46621  |
| Q13439 | Golgin subf  | GOLGA4       | -0.62803 | -0.4021  | 0.155119 | 0.198904 | 0.239291 | -0.28284 | -0.12274 | -0.1571  | -0.1281  | 0.110703 |
| Q13442 | 28 kDa hea   | PDAP1 HAS    | -0.22375 | -0.15552 | -0.49022 | -0.45951 | -0.33197 | -0.50286 | -0.13787 | -0.31773 | 0.267611 | 0.44218  |
| Q13451 | Peptidyl-pr  | FKBP5 AIG    | 0.963079 | 1.058748 | 1.045771 | 1.079167 | 1.301854 | 0.952584 | 1.224585 | 1.261788 | 1.350996 | 1.374276 |
| Q13459 | Unconvent    | MYO9B MY     | -0.73526 | -0.74506 | -0.28345 | -0.26053 | -0.31451 | -0.60977 | -0.6477  | -0.48543 | -0.45003 | -0.68339 |
| Q13464 | Rho-associ   | ROCK1        | -0.33502 | -0.05386 | -0.20757 | -0.09085 | -0.1488  | -0.28664 | -0.21786 | -0.20582 | -0.11045 | -0.05314 |
| Q13469 | Nuclear fac  | NFATC2 NF    | 0.070782 | 0.17379  | 0.032022 | -0.28211 | 0.292941 | 0.277534 | 0.356331 | 0.363312 | -0.36513 | -0.31219 |
| Q13485 | Mothers a    | SMAD4 DP     | -1.99761 | -2.07419 | -1.12635 | -0.95763 | -1.3433  | -1.5422  | -1.51263 | -1.00159 | -1.85957 | -1.10393 |
| Q13488 | V-type pro   | TCIRG1 ATF   | -0.20133 | 0.193132 | 0.416986 | -0.00629 | -0.08421 | 0.084889 | 0.173332 | -0.10692 | -0.3505  | -0.04952 |
| Q13492 | Phosphatid   | PICALM CA    | -0.833   | -0.51049 | -0.20084 | -0.2961  | -0.26719 | -0.45687 | -0.4255  | -0.22499 | -0.32077 | -0.22956 |
| Q13496 | Myotubula    | MTM1 CG2     | -2.45388 | -2.08691 | -1.46529 | -1.52356 | -1.29613 | -1.22422 | -2.60718 | -2.99367 | -1.67243 | -0.85688 |
| Q13501 | Sequestosc   | SQSTM1 OI    | -1.01597 | -0.83141 | -0.86693 | -0.87357 | -0.68803 | -0.89016 | -1.03506 | -0.91353 | -0.9193  | -0.96257 |
| Q13510 | Acid ceram   | ASAH1 ASA    | 1.781139 | 1.927025 | 0.828368 | 1.157325 | 0.703868 | 0.819792 | 1.069902 | 1.086115 | -0.28011 | -0.58718 |

|        |                         |          |          |          |          |          |          |          |          |          |          |
|--------|-------------------------|----------|----------|----------|----------|----------|----------|----------|----------|----------|----------|
| Q13523 | Serine/thre PRPF4B KIA  | -1.03448 | -0.91783 | -1.11652 | -1.40896 | -0.72644 | -0.74061 | -1.37435 | -1.32639 | -0.96747 | -0.87924 |
| Q13526 | Peptidyl-pr PIN1        | -0.40475 | -0.28538 | -0.3433  | -0.15345 | -0.14062 | -0.21476 | -0.429   | -0.20341 | -0.02015 | 0.053009 |
| Q13542 | Eukaryotic EIF4EBP2     | 0.280108 | 0.246696 | 0.083328 | -0.22344 | 0.348454 | -0.30293 | -0.34514 | -0.08854 | 0.397248 | 0.648451 |
| Q13546 | Receptor-ir RIPK1 RIP F | -0.20007 | -0.07081 | 0.005579 | -0.10036 | -0.30172 | -0.08463 | -0.11916 | -0.21013 | -0.26241 | -0.18942 |
| Q13547 | Histone de HDAC1 RPI    | -0.40296 | 0.09067  | -0.30507 | -0.19438 | 0.236797 | 0.165956 | 0.168069 | 0.235025 | -0.02519 | 0.208682 |
| Q13555 | Calcium/ca CAMK2G C     | -0.7256  | -0.1978  | -0.51457 | -0.18015 | 0.266224 | -0.2108  | 0.02726  | -0.34581 | 0.083514 | 0.207375 |
| Q13557 | Calcium/ca CAMK2D C     | -0.74507 | -0.39183 | -0.60657 | -0.46179 | -0.17365 | -0.05571 | -0.0897  | -0.02308 | -0.18593 | -0.03585 |
| Q13561 | Dynactin st DCTN2 DCT   | -0.05645 | -0.24136 | 0.373022 | 0.320213 | 0.454068 | 0.652573 | 0.661349 | 0.673772 | 0.530515 | 0.70384  |
| Q13564 | NEDD8-act NAE1 APPB     | -0.29247 | -0.04647 | -0.39983 | -0.82504 | -0.84018 | -0.81836 | -0.64292 | -1.01254 | -0.61089 | -0.71111 |
| Q13573 | SNW doma SNW1 SKIIF     | 0.148789 | 0.051622 | 0.395898 | 0.140327 | 0.31895  | 0.435386 | 0.31166  | 0.053321 | 0.537028 | 0.320422 |
| Q13574 | Diacylglyce DGKZ DAGI   | -0.45187 | -0.33662 | 0.038474 | -0.0126  | 0.300954 | 0.221677 | -0.02667 | -0.04867 | 0.543512 | 0.695922 |
| Q13576 | Ras GTPase IQGAP2       | -0.00375 | -0.07627 | 0.236803 | -0.14252 | -0.15697 | -0.10819 | -0.23409 | -0.11524 | -0.43721 | -0.46996 |
| Q13586 | Stromal int STIM1 GOK   | -0.80735 | -0.62783 | -0.40883 | -0.50355 | -0.66918 | -0.4837  | -0.68012 | -0.75052 | -0.62399 | -0.66925 |
| Q13588 | GRB2-relat GRAP         | 1.003028 | 1.108863 | 0.69984  | 0.830467 | 0.931469 | 1.208271 | 0.709072 | 1.104869 | 1.490805 | 1.555154 |
| Q13595 | Transforme TRA2A        | 0.756287 | 0.826914 | 1.043181 | 0.796561 | 0.585209 | 0.553388 | 0.842063 | 0.929924 | 0.904762 | 0.986351 |
| Q13596 | Sorting nex SNX1        | -1.53727 | -1.28345 | -1.44392 | -0.86821 | -1.39257 | -1.34502 | -1.39808 | -1.24936 | -1.31487 | -1.29345 |
| Q13601 | KRR1 small KRR1 HRB2    | 0.449478 | 0.206711 | 0.295421 | 0.445581 | 0.760338 | 0.81348  | 0.877898 | 0.645539 | 0.043266 | 0.515052 |
| Q13613 | Myotubula MTMR1         | -0.49964 | -0.93821 | -0.47069 | -0.39428 | -0.5231  | -0.16175 | -0.75585 | -0.55102 | -0.41818 | -0.0223  |
| Q13615 | Myotubula MTMR3 KI/     | -0.96408 | -1.28345 | -1.20046 | -1.14505 | -1.39046 | -1.48981 | -1.15087 | -1.51785 | -1.4245  | -1.29345 |
| Q13616 | Cullin-1 (CUL1          | -0.94104 | -0.82091 | -0.7508  | -1.04495 | -1.45779 | -0.79348 | -0.91653 | -0.6759  | -1.03346 | -0.67374 |
| Q13617 | Cullin-2 (CUL2          | -1.18057 | -0.43862 | -0.43335 | -0.24558 | -0.58869 | -0.62654 | -0.6477  | -0.48543 | -0.4119  | -0.47221 |
| Q13618 | Cullin-3 (CUL3 KIAA     | 0.057805 | 0.297557 | 0.125751 | 0.371596 | -0.00373 | 0.066097 | 0.109328 | 0.000511 | 0.030012 | 0.062887 |
| Q13619 | Cullin-4A (CUL4A        | -0.91365 | -0.77791 | -1.31339 | -1.2118  | -1.5729  | -1.46091 | -1.14336 | -1.12515 | -1.14199 | -0.95502 |
| Q13620 | Cullin-4B (CUL4B KIA/   | -0.86002 | -1.17962 | -0.82064 | -0.77964 | -1.42872 | -0.81953 | 0.286323 | 0.060543 | -0.7718  | -0.58399 |
| Q13627 | Dual specif DYRK1A DY   | -0.0026  | 0.018524 | 0.238857 | 0.262817 | 0.080322 | 0.246177 | 0.007974 | 0.077268 | 0.436381 | 0.16695  |
| Q13630 | GDP-L-fucc GFUS SDR4    | 0.872075 | 1.036949 | 0.45972  | 0.552707 | 0.545655 | 0.73594  | 0.679667 | 0.578466 | 0.546797 | 0.922667 |
| Q13642 | Four and a FHL1 SLIM1   | -0.22239 | -0.77649 | -0.53138 | -0.55087 | -0.49139 | -0.73151 | -0.3322  | -0.63743 | -0.49584 | -0.41799 |
| Q13685 | Angio-asso AAMP         | -1.67102 | -1.56786 | -1.4181  | -1.71151 | -2.41022 | -1.9532  | -0.46713 | -0.6644  | -1.95976 | -2.09818 |
| Q13724 | Mannosyl-( MOGS GCS     | 1.136495 | 1.118558 | 0.39892  | 0.796181 | 0.309977 | 0.356649 | 0.952499 | 0.561749 | 0.076085 | 0.045242 |
| Q13761 | Runt-relate RUNX3 AM    | 0.879969 | 1.221835 | 1.284002 | 0.984233 | 1.090085 | 1.066742 | 1.211388 | 1.469803 | 0.816754 | 0.843565 |
| Q13765 | Nascent po NACA HSD4    | 1.026756 | 1.228243 | 0.359567 | 0.567201 | 0.387104 | 0.736433 | 0.501902 | 0.554649 | 0.921111 | 1.043679 |
| Q13769 | THO compl THOC5 C22     | -0.60942 | -0.42286 | -0.13523 | 0.102487 | -0.20187 | -0.43324 | -0.28448 | -0.32366 | -0.18508 | 0.024739 |
| Q13813 | Spectrin al SPTAN1 NE   | 0.073285 | 0.225542 | -0.16506 | 0.055263 | 0.072079 | 0.107888 | -0.10063 | -0.05004 | 0.36459  | 0.330752 |

|        |              |         |       |          |          |          |          |          |          |          |          |          |          |
|--------|--------------|---------|-------|----------|----------|----------|----------|----------|----------|----------|----------|----------|----------|
| Q13823 | Nucleolar C  | GNL2    | NGP1  | 0.873367 | 0.253253 | -0.01568 | 0        | 0.422455 | 0.194011 | 0.257053 | -0.09464 | -0.1281  | -0.40036 |
| Q13825 | Methylglut   | AUH     |       | -1.40296 | -0.50348 | -1.32193 | -1.18728 | -2.79256 | -1.34395 | -0.89162 | -1.2091  | -1.68753 | -1.71937 |
| Q13838 | Spliceosom   | DDX39B  | BA    | 1.867235 | 2.062566 | 1.800044 | 1.641169 | 1.931878 | 1.834496 | 1.827003 | 1.858994 | 1.78962  | 1.925436 |
| Q13867 | Bleomycin    | BLMH    |       | 0.429108 | 0.516335 | 0.2886   | 0.42081  | 0.125338 | 0.859233 | 0.35488  | 0.581531 | 0.135734 | 0.229224 |
| Q13868 | Exosome c    | EXOSC2  | RR    | -0.6227  | -0.67862 | -1.38154 | -1.27932 | -0.94719 | -0.96566 | -1.25798 | -0.93951 | -1.33448 | -0.76205 |
| Q13884 | Beta-1-syn   | SNTB1   | SNT   | -0.31699 | 0.488442 | 0.045286 | -0.28085 | 0.329333 | -0.42236 | -0.26211 | 0.293011 | -0.50827 | 0.283365 |
| Q13895 | Bystin       | BYSL    | ENP1  | 0.034655 | -0.03025 | 0.249874 | 0.146148 | 0.365368 | 0.183806 | 0.147465 | 0.16942  | 0.208584 | 0.086473 |
| Q13905 | Rap guanin   | RAPGEF1 | G     | -2.45319 | -1.93197 | -1.5541  | -1.75803 | -1.07635 | -1.66935 | -3.01027 | -1.64539 | -1.67243 | -2.08194 |
| Q13951 | Core-bindir  | CBFB    |       | -0.22239 | -0.152   | 0.767827 | 0.783867 | 0.482236 | 0.435386 | 0.690171 | 0.410737 | 0.789736 | 0.833666 |
| Q13952 | Nuclear tra  | NFYC    |       | 0.802079 | 0.802865 | 0.668883 | 0.894897 | 0.838406 | 1.042288 | 0.999637 | 0.821164 | 0.738362 | 0.93114  |
| Q14004 | Cyclin-dep   | CDK13   | CDC   | -1.55497 | -0.90202 | -1.38163 | -1.41923 | -1.2076  | -1.5366  | -1.66382 | -1.10692 | -1.37474 | -1.1589  |
| Q14005 | Pro-interle  | IL16    |       | -1.05099 | -0.70714 | -0.26301 | -0.33048 | 0.107446 | 0.356485 | 0.081985 | 0.178092 | -0.01743 | -0.10392 |
| Q14008 | Cytoskelet   | CKAP5   | KIAA  | -0.09398 | -0.0699  | -0.14707 | 0.143284 | -0.15291 | -0.37729 | 0.150467 | 0.241889 | -0.38026 | -0.17031 |
| Q14011 | Cold-induci  | CIRBP   | A18   | -1.53727 | -1.35371 | -1.02359 | -0.52356 | -0.22487 | -0.635   | -0.70492 | -0.79737 | -0.75754 | -0.77887 |
| Q14019 | Coactosin-I  | COTL1   | CLP   | 0.879969 | 0.869498 | 0.695824 | 0.809146 | 0.685489 | 0.656046 | 1.117836 | 1.031149 | 0.67925  | 0.503021 |
| Q14103 | Heterogen    | HNRNPD  | A     | 1.242091 | 1.141468 | 0.969089 | 0.743225 | 1.007067 | 0.555912 | 1.190537 | 0.73465  | 1.188969 | 1.272738 |
| Q14119 | Vascular er  | VEZF1   | DB1   | 0.047697 | -0.19153 | -0.36146 | -0.00873 | -0.11715 | 0.20817  | 0.108743 | -0.31547 | -0.70288 | -0.72536 |
| Q14137 | Ribosome I   | BOP1    | KIAA  | -1.60942 | -1.37151 | -1.96153 | -1.8011  | -1.74193 | -1.56866 | -2.11718 | -3.07039 | -1.93546 | -1.47836 |
| Q14141 | Septin-6     | SEPTIN6 | KIAA  | -0.40296 | -0.11353 | -0.45873 | -0.05765 | 0.01005  | 0.048363 | -0.33379 | -0.26107 | -0.17325 | 0.03065  |
| Q14142 | Tripartite n | TRIM14  | KIAA  | -0.96699 | -1.25589 | 0.399356 | 0.043253 | -1.13556 | -1.48883 | -0.97507 | -1.20047 | -0.22662 | -0.91848 |
| Q14146 | Unhealthy    | URB2    | KIAA  | -1.15335 | -1.2185  | -0.86605 | -0.92663 | -0.66918 | -0.9783  | -0.59266 | -0.93289 | -1.4245  | -0.76377 |
| Q14147 | Probable A   | DHX34   | DD    | -3.06215 | -3.58397 | -1.54624 | -2.3943  | -3.19302 | -1.77846 | -1.87362 | -2.18574 | -1.96773 | -1.77179 |
| Q14149 | MORC fam     | MORC3   | KIAA  | -0.25949 | -0.07739 | -0.60617 | -0.57895 | -0.40123 | -0.18045 | 0.220785 | -0.01636 | -0.65654 | -0.3709  |
| Q14151 | Scaffold at  | SAFB2   | KIAA  | -0.12005 | 0.072314 | 0.503    | 0.255026 | 0.158799 | 0.123912 | 0.283908 | 0.569615 | 0.661475 | 0.424629 |
| Q14152 | Eukaryotic   | EIF3A   | EIF3E | -0.01217 | 0.118315 | 0.226857 | 0.142847 | 0.159271 | -0.12369 | 0.380085 | 0.18564  | 0.386468 | 0.273324 |
| Q14155 | Rho guanin   | ARHGEF7 | C     | 0.480222 | 0.488209 | 1.218488 | 0.875609 | 0.84717  | 0.785329 | 0.26984  | -0.03477 | 0.822097 | 0.549117 |
| Q14157 | Ubiquitin-a  | UBAP2L  | KIAA  | -0.60942 | -0.45457 | 0.158617 | -0.28325 | -0.0594  | 0.043069 | -0.378   | -0.39232 | -0.22396 | -0.2507  |
| Q14160 | Protein scri | SCRIB   | CRIB  | -1.06332 | -1.18181 | -0.94143 | -0.86044 | -1.01998 | -0.74992 | -1.43632 | -0.92769 | -1.19922 | -1.06359 |
| Q14161 | ARF GTPase   | GIT2    | KIAA0 | -0.22311 | -0.25465 | -0.09675 | -0.22545 | -0.17285 | 0.406817 | -0.10928 | 0.083416 | -0.44854 | -0.45246 |
| Q14165 | Malectin     | MLEC    | KIAA  | 0.560509 | 0.485427 | -0.39183 | -0.19444 | -0.28703 | -0.55254 | 0.094068 | -0.79737 | -1.03822 | -1.19898 |
| Q14166 | Tubulin--ty  | TLL12   | KIAA  | -0.97867 | -0.22385 | 0.547563 | 0.440327 | 0.130907 | 0.245816 | 0.626383 | 0.591981 | 0.469585 | 0.648725 |
| Q14186 | Transcripti  | TFDP1   | DP1   | -0.0786  | 0.056481 | 0.224236 | 0.11106  | -0.09811 | 0.207984 | -0.03404 | -0.0715  | 0.090186 | -0.09319 |
| Q14197 | Peptidyl-tR  | MRPL58  | DC    | 0.06936  | 0.078491 | -0.157   | -0.28198 | -0.5279  | -0.31131 | -0.08284 | -0.23474 | 0.044976 | 0.169187 |

|        |                                                           |          |          |          |          |          |          |          |          |          |          |
|--------|-----------------------------------------------------------|----------|----------|----------|----------|----------|----------|----------|----------|----------|----------|
| Q14203 | Dynactin subunit DCTN1                                    | -0.39497 | -0.18709 | -0.13478 | -0.23816 | -0.02248 | 0.021695 | -0.313   | -0.11309 | 0.139217 | 0.280628 |
| Q14204 | Cytoplasmic dynein 1 heavy chain 1 DYNC1H1                | 0.35161  | 0.465798 | 0.25979  | 0.497745 | 0.302007 | 0.212994 | 0.340229 | 0.205056 | 0.099836 | 0.117811 |
| Q14232 | Translation initiation factor 2B EIF2B2                   | 0.20909  | 0.363022 | 0.330722 | 0.114058 | -0.0964  | 0.09131  | 0.007472 | 0.056385 | 0.354156 | 0.436667 |
| Q14240 | Eukaryotic translation initiation factor 4A2 DDIT4        | 0.3367   | 0.25473  | 0.353027 | 0.092777 | 0.01314  | 0.005775 | 0.21106  | 0.080424 | 0.513874 | 0.677839 |
| Q14241 | Elongin-A (Elongin-1) ELOA                                | -1.57975 | -1.53027 | -1.02909 | -1.41389 | -1.54308 | -1.10653 | -1.84285 | -1.47678 | -1.18065 | -0.8046  |
| Q14242 | P-selectin glycoprotein ligand 1 SELPLG                   | 1.588998 | 1.575836 | 1.081487 | 1.321928 | 1.300954 | 0.93002  | 1.200299 | 0.820382 | 0.981017 | 1.217326 |
| Q14247 | Src substrate CTTN                                        | -1.03684 | -1.38163 | -1.07195 | -1.48794 | -0.71727 | -1.38618 | -1.68012 | -1.53434 | -1.15936 | -1.97369 |
| Q14254 | Flotillin-2 (Flotillin-2) FLOT2                           | 0.249318 | 0.543879 | 0.218261 | 0.315656 | 0.595369 | 0.337997 | 0.247985 | 0.203792 | 0.748237 | 0.702601 |
| Q14257 | Reticulocalin 2 RCN2                                      | -0.87442 | -0.39623 | -0.98467 | -0.67113 | -1.47654 | -0.91873 | -0.7741  | -0.70831 | -0.78165 | -0.82833 |
| Q14258 | E3 ubiquitin ligase TRIM25                                | 0.24984  | 0.291986 | 0.182799 | 0.329436 | 0.170938 | 0.370467 | 0.194718 | 0.25634  | 0.467984 | 0.406866 |
| Q14289 | Protein tyrosine phosphatase 2B FAK1                      | 0.121991 | 0.077938 | 0.001074 | -0.03171 | 0.575013 | -0.05004 | 0.079617 | 0.131245 | 0.338802 | 0.362078 |
| Q14318 | Peptidyl prolyl isomerase FKBP8                           | 1.697639 | 1.910525 | 1.603045 | 1.561778 | 1.65983  | 1.895185 | 1.762824 | 1.686278 | 1.463711 | 1.327229 |
| Q14331 | Protein FRG1                                              | 0.03592  | 0.144576 | 0.27275  | 0.171318 | 0.065423 | 0.125531 | -0.08427 | 0.415037 | 0.073529 | -0.12473 |
| Q14344 | Guanine nucleotide exchange factor 13 GNA13               | 0.290058 | 0.553427 | -0.18709 | 0.411898 | 0.567425 | 0.921211 | 0.336182 | 0.321928 | -0.18593 | -0.57394 |
| Q14353 | Guanidino transferase GAMT                                | -0.18746 | -0.31706 | -0.86605 | -0.67557 | -0.97056 | -0.55254 | -0.81762 | -0.71049 | -0.41818 | -0.29888 |
| Q14376 | UDP-glucosyltransferase GALE                              | -1.68536 | -1.18265 | -1.84488 | -0.56937 | -0.6574  | -1.14958 | -0.63176 | -1.22239 | -1.38702 | -1.31531 |
| Q14444 | Caprin-1 (Caprin-1) CAPRIN1                               | -0.38702 | -0.14768 | -0.37656 | -0.62632 | -0.269   | -0.35789 | -0.55459 | -0.5764  | -0.35652 | -0.19898 |
| Q14457 | Beclin-1 (Beclin-1) BECN1                                 | -0.67503 | -0.6757  | -0.39677 | -0.36573 | -0.21289 | -0.58735 | -0.65157 | -0.49043 | -0.3654  | -0.33033 |
| Q14498 | RNA-binding protein RBM39                                 | -0.18871 | -0.01568 | 0.126255 | 0.24285  | 0.072356 | -0.00324 | 0.079633 | -0.28033 | 0.103482 | 0.174834 |
| Q14511 | Enhancer of NEDD9 CASK                                    | -1.59104 | -2.00782 | -2.75697 | -3.03906 | -2.51245 | -2.04439 | -2.38368 | -3.38113 | -1.89984 | -3.06333 |
| Q14520 | Hyaluronan-binding protein 2 HABP2                        | -3.5025  | -2.3363  | -1.81642 | -2.17557 | -1.69302 | -2       | -2.55459 | -1.80749 | -2.11787 | -1.95641 |
| Q14527 | Helicase-like transcription factor HIP11                  | -1.19438 | -0.95395 | -0.93892 | -1.23078 | -0.24236 | -0.81558 | -1.09516 | -1.24936 | -1.2687  | -0.9141  |
| Q14558 | Phosphoric acid phosphatase PRPSAP1                       | -0.39247 | -0.54963 | -1.10317 | -0.82697 | -0.83048 | -0.85756 | -0.92792 | -0.77248 | -0.71762 | -0.64417 |
| Q14562 | ATP-dependent DNA double-strand break repair protein DDX8 | -1.70499 | -1.5541  | -1.88753 | -3.0906  | -2.69302 | -3.04439 | -1.18127 | -1.22725 | -2.45003 | -3.13927 |
| Q14566 | DNA replication fork MCM6                                 | -0.40296 | -0.38163 | -1.01568 | -0.73697 | -1.33313 | -1.34395 | -0.782   | -1.18286 | -1.2916  | -0.96502 |
| Q14571 | Inositol 1,4-bisphosphate 2-kinase ITPR2                  | -2.2073  | -0.74853 | -1.20437 | -1.25011 | -1.0162  | -1.0085  | -1.48134 | -1.97728 | -1.29498 | -1.07263 |
| Q14573 | Inositol 1,4-bisphosphate 3-kinase ITPR3                  | 0.202801 | 0.302985 | -0.028   | -0.53207 | 0.217337 | -0.0917  | 0.220451 | 0.079072 | -0.16891 | 0.010505 |
| Q14643 | Inositol 1,4-bisphosphate 1-phosphatase INSP1             | -0.88947 | -0.96317 | -0.77668 | -1.4165  | -1.49366 | -1.56331 | -2.09317 | -1.26585 | -1.76875 | -1.8772  |
| Q14644 | Ras GTPase RASA3                                          | -0.49486 | -0.49986 | -0.96723 | -0.75521 | -1.22708 | -1.00478 | -1.28729 | -1.1643  | -0.95309 | -0.99547 |
| Q14653 | Interferon response factor 3 IRF3                         | 0.526247 | 0.779895 | -0.25821 | -0.26824 | -0.56931 | -0.5606  | 0.147627 | -0.38647 | -0.16074 | -0.24759 |
| Q14657 | EKC/KEOPS domain-containing protein 3 DXS                 | -2.06193 | -1.81714 | -1.061   | -1.46829 | -1.38091 | -0.68733 | -0.65441 | -0.62831 | -0.82346 | -0.66012 |
| Q14669 | E3 ubiquitin ligase TRIP12                                | -0.77145 | -0.81714 | -0.75002 | -0.85681 | -1.28137 | -1.75899 | -1.35819 | -1.13179 | -1.3012  | -1.01781 |
| Q14671 | Pumilio homologue PUM1                                    | -4.08746 | -2.38163 | -3.24598 | -2.98751 | -2.79256 | -3.45943 | -3.38466 | -2.76783 | -2.23502 | -2.00888 |



|        |                         |          |          |          |          |          |          |          |          |          |          |
|--------|-------------------------|----------|----------|----------|----------|----------|----------|----------|----------|----------|----------|
| Q14676 | Mediator o MDC1 KIAA    | -1.27811 | -0.87813 | -0.40952 | -0.65615 | -0.65432 | -0.93648 | -1.09516 | -1.58814 | -0.66493 | -0.46634 |
| Q14677 | Clathrin int CLINT1 EN1 | 0.10557  | 0.095719 | 0.647223 | 0.183358 | 0.199579 | 0.30224  | 0.134358 | 0.217719 | 0.382345 | 0.244348 |
| Q14678 | KN motif a KANK1 ANK    | -3.37126 | -1.91667 | -2.02359 | -1.26053 | -0.87199 | -1.31647 | -1.43911 | -0.85834 | -1.45003 | -1.30433 |
| Q14683 | Structural r SMC1A DXS  | 0.406735 | 0.414985 | 0.462872 | 0.324072 | 0.458531 | 0.451012 | 0.4825   | 0.530515 | 0.592758 | 0.495561 |
| Q14684 | Ribosomal RRP1B KIAA    | -0.27277 | -0.06786 | -0.26927 | -0.32193 | -0.14048 | -0.35789 | -0.16674 | -0.30861 | -0.17524 | -0.29345 |
| Q14690 | Protein RRI PDCD11 Kl   | -0.71835 | -0.63051 | -0.90933 | -0.68157 | -0.64572 | -0.74061 | -0.47422 | -0.54265 | -0.67996 | -1       |
| Q14692 | Ribosome l BMS1 BMS     | -1.24905 | -0.85482 | -0.44592 | -0.4813  | -0.83749 | -0.51827 | -0.3389  | -0.5566  | -0.43118 | -0.54021 |
| Q14694 | Ubiquitin c USP10 KIAA  | -3.57289 | -2.46529 | -3.53138 | -3.84549 | -2.37719 | -2.54081 | -3.3322  | -3.27684 | -3.30319 | -4.26127 |
| Q14696 | LRP chaper MESD KIAA    | -0.17372 | -0.38672 | 0.33311  | -0.17014 | 0.10743  | 0.182024 | 0.022038 | -0.04217 | 0.210385 | -0.00829 |
| Q14697 | Neutral alp GANAB G2    | 0.615347 | 0.749953 | 0.277126 | 0.225484 | 0.100527 | 0.151074 | 0.345029 | 0.132815 | -0.03775 | -0.10212 |
| Q14699 | Raftlin (Cel RFTN1 KIAA | 0.402616 | 0.265839 | 0.401689 | 0.377697 | 0.410165 | -0.07751 | 0.476266 | 0.401749 | -0.0192  | 0.027652 |
| Q14738 | Serine/thre PPP2R5D     | -0.79226 | -0.48549 | -0.58364 | -0.72086 | -1.61342 | -0.99604 | -0.94824 | -0.47759 | -1.05137 | -0.96707 |
| Q14739 | Delta(14)-s LBR         | 1.777524 | 1.617622 | 0.61973  | 0.945673 | 0.276604 | 0.495421 | 0.578125 | 0.670179 | 0.126316 | -0.05642 |
| Q14746 | Conserved COG2 LDLC     | -2.80735 | -3.44392 | -3.88753 | -3.45317 | NA       | NA       | NA       | NA       | -4.16993 | -3.39453 |
| Q14761 | Protein tyr PTPRCAP LI  | 0.088176 | 0.797293 | 0.141044 | -0.15899 | -0.269   | 0.079727 | 0.186878 | -0.09464 | -0.33852 | -0.03585 |
| Q14764 | Major vault MVP LRP     | 0.52264  | 0.413757 | 0.431515 | 0.193429 | 0.154975 | 0.259387 | 0.226771 | 0.246722 | 0.578663 | 0.549117 |
| Q14765 | Signal trans STAT4      | -1.14734 | -1.03095 | -0.87684 | -0.86069 | -1.12241 | -0.87236 | -0.63001 | -0.63647 | -1.31868 | -1.41622 |
| Q14789 | Golgin subf GOLGB1      | -1.30986 | -1.05857 | -1.13379 | -1.02531 | -0.83088 | -0.92183 | -1.13564 | -0.83523 | -0.86966 | -0.97979 |
| Q14790 | Caspase-8 ( CASP8 MCF   | -0.35735 | -0.86838 | -0.49712 | -0.42764 | -0.94177 | -0.59323 | -0.89416 | -0.98721 | -0.78311 | -0.86509 |
| Q14839 | Chromodoi CHD4          | 0.414303 | 0.427707 | 0.431454 | 0.399497 | 0.475813 | 0.588564 | 0.560738 | 0.192645 | 0.168877 | 0.509082 |
| Q14847 | LIM and SH LASP1 MLN    | 0.648766 | 0.410274 | 0.416124 | 0.321926 | 0.516095 | 0.360386 | 0.341643 | 0.14406  | 0.112574 | 0.379862 |
| Q14919 | Dr1-associ DRAP1        | 0.158197 | 0.053332 | 0.206042 | -0.1336  | 0.324337 | 0.159587 | 0.117836 | 0.384664 | 0.442405 | 0.38922  |
| Q14966 | Zinc finger ZNF638 NP   | -0.20133 | -0.27395 | 0.112475 | 0.037153 | -0.30343 | -0.31741 | -0.16801 | -0.13989 | -0.01421 | -0.06959 |
| Q14974 | Importin s KPNB1 NTF    | 0.177233 | 0.352219 | 0.452109 | 0.544349 | 0.306978 | 0.461023 | 0.552427 | 0.500068 | 0.301033 | 0.442056 |
| Q14978 | Nucleolar a NOLC1 KIAA  | 0.269949 | 0.401455 | 0.049352 | 0.030975 | 0.406865 | 0.193599 | 0.323921 | 0.274183 | 0.337566 | 0.31843  |
| Q14980 | Nuclear mi NUMA1 NM     | -0.38392 | -0.30006 | -0.12241 | -0.27588 | -0.03767 | -0.16175 | -0.13502 | -0.14758 | 0.152253 | 0.132329 |
| Q14BN4 | Sarcolemm SLMAP KIAA    | -0.85042 | -0.84488 | -0.54839 | -0.79021 | -0.51245 | -0.73151 | -0.73867 | -0.59358 | -0.93546 | -1.11991 |
| Q14C86 | GTPase-act GAPVD1 G     | -1.70499 | -1.30256 | -1.1264  | -1.90302 | -1.47063 | -0.72247 | -1.18536 | -1.43812 | -1.46773 | -1.29676 |
| Q14CW9 | Ataxin-7-lik ATXN7L3    | -3.37126 | -2.69849 | -1.19153 | -2.63604 | -1.84503 | -1.65208 | -1.81762 | -1.6735  | -1.78165 | -1.58054 |
| Q15005 | Signal pept SPCS2 KIAA  | 0.029689 | 0.004727 | 0.186323 | 0.044985 | -0.23087 | -0.19858 | 0.207458 | -0.31586 | -0.50557 | -0.31973 |
| Q15006 | ER membræ EMC2 KIAA     | -2.94062 | -2.15634 | -2.48699 | -3.38606 | NA       | NA       | -2.96963 | -2.88982 | -2.93546 | -3.54137 |
| Q15007 | Pre-mRNA- WTAP KIAA     | -0.18772 | -0.11912 | -0.11418 | -0.02593 | -0.19359 | -0.33471 | -0.16858 | -0.31315 | -0.12117 | -0.17949 |
| Q15008 | 26S protea PSMD6 KIAA   | 0.839892 | 0.799535 | 0.27275  | 0.533888 | 0.559958 | 0.431339 | 0        | 0.35811  | 0.411497 | 0.442435 |

|        |                          |          |          |          |          |          |          |          |          |          |          |
|--------|--------------------------|----------|----------|----------|----------|----------|----------|----------|----------|----------|----------|
| Q15014 | Mortality f; MORF4L2 h   | -2.53727 | -1.88753 | -2.5541  | -2.61577 | -1.62263 | -1.52083 | -2.16227 | -1.46949 | -3.1281  | -2.30433 |
| Q15018 | BRISC com; ABRAXAS2      | -0.64814 | -0.63879 | -0.71646 | -1.21613 | -0.60806 | -0.52869 | -0.77495 | -0.47055 | -0.55166 | -0.54622 |
| Q15019 | Septin-2 (N) SEPTIN2 DI  | -0.22948 | -0.39696 | -0.16955 | -0.08172 | -0.19903 | 0.14543  | -0.29649 | -0.35569 | -0.14868 | 0.014081 |
| Q15020 | Squamous SART3 KIAA      | 0.024045 | 0.046047 | 0.079643 | 0.024875 | -0.15697 | 0.169925 | 0.040358 | 0.299595 | 0.032631 | 0.090064 |
| Q15022 | Polycomb 3 SUZ12 CHE     | -0.63246 | -0.33475 | -0.9571  | -0.81607 | -1.14647 | -0.68256 | -0.902   | -0.83574 | -0.3757  | -0.7125  |
| Q15024 | Exosome c; EXOSC7 KIA    | -1.07357 | -0.60489 | -1.04687 | -0.75982 | -0.69166 | -0.99601 | -1.26096 | -0.97228 | -1.02838 | -0.47919 |
| Q15025 | TNFAIP3-in TNIP1 KIAA    | 0.344377 | 0.166862 | 0.892785 | 0.851477 | 0.699579 | 0.6386   | 0.322756 | 0.498454 | 0.882164 | 0.70384  |
| Q15027 | Arf-GAP wi ACAP1 CEN     | 0.324351 | 0.288798 | -0.07605 | -0.34564 | -0.47063 | 0.133677 | -0.07346 | -0.42979 | -0.3505  | -0.59384 |
| Q15029 | 116 kDa U5 EFTUD2 KIA    | 0.495109 | 0.548103 | 0.890432 | 0.981667 | 1.007645 | 1.07194  | 0.767595 | 0.916274 | 1.172768 | 1.090413 |
| Q15042 | Rab3 GTPa; RAB3GAP1      | 0.372668 | 0.574746 | 0.8635   | 0.783268 | 0.948115 | 0.903595 | 0.558567 | 0.610061 | 0.905129 | 0.891146 |
| Q15046 | Lysine--tRN KARS1 KAR    | 0.165949 | 0.183203 | 0.33311  | 0.248857 | 0.508612 | 0.3723   | 0.476012 | 0.478416 | 0.445804 | 0.334001 |
| Q15047 | Histone-lys SETDB1 ESI   | -1.55497 | -1.39183 | -0.98449 | -1.63604 | -1.14048 | -1.41504 | -1.13955 | -1.34792 | -0.65006 | -0.94785 |
| Q15050 | Ribosome l RRS1 KIAAC    | -0.33258 | 0.01165  | -0.57719 | -0.38457 | -0.269   | -0.16175 | -0.45305 | -0.27684 | -0.38702 | -0.32636 |
| Q15052 | Rho guanin ARHGEF6 C     | -0.0747  | 0.203328 | -0.17383 | -0.35364 | -0.38065 | -0.37245 | -0.27453 | -0.23187 | -0.56432 | -0.20465 |
| Q15056 | Eukaryotic EIF4H KIAA    | 0.319027 | 0.95362  | 1.221835 | 1.212502 | 1.368754 | 1.037755 | 1.459712 | 1.042311 | 1.295281 | 1.110703 |
| Q15057 | Arf-GAP wi ACAP2 CEN     | -1.13869 | -1.08445 | -0.82402 | -1.13124 | -0.96857 | -1.0333  | -1.24473 | -1.16993 | -1.11274 | -0.93934 |
| Q15059 | Bromodom BRD3 KIAAI      | 0.291615 | 0.286619 | 0.710977 | 0.794796 | 1.348454 | 1.410933 | 0.243868 | 0.363662 | 0.510869 | 0.608202 |
| Q15061 | WD repeat WDR43 KIA      | -0.34902 | -0.29463 | -0.6893  | -0.36733 | -0.37627 | -0.23635 | -0.45721 | -0.52986 | -0.40465 | -0.21422 |
| Q15075 | Early endo; EEA1 ZFYVI   | -0.43576 | -0.517   | -0.09675 | -0.42764 | -0.62263 | -0.59318 | -0.35819 | -0.56789 | -0.2916  | 0.243729 |
| Q15084 | Protein dis; PDIA6 ERP5  | 0.155828 | 0.285602 | 0.464211 | 0.477823 | -0.11091 | 0.021695 | -0.01012 | 0.200774 | -0.32075 | -0.12307 |
| Q15102 | Platelet-act; PAFAH1B3   | -1.82873 | -1.68589 | -1.12199 | -0.92663 | -2.89947 | -1.0902  | -1.83577 | -1.72935 | -1.58496 | -1.77887 |
| Q15118 | [Pyruvate c; PDK1 PDHK   | -0.18057 | 0.097975 | -1.02359 | -1.20163 | -0.27798 | -0.73151 | -0.782   | -0.93289 | -0.53629 | -0.79414 |
| Q15120 | [Pyruvate c; PDK3 PDHK   | -1.36548 | -0.90037 | -1.46815 | -1.55985 | -1.68505 | -0.80551 | -1.06547 | -0.90316 | -0.93727 | -1.27636 |
| Q15121 | Astrocytic 3; PEA15      | 0.138605 | 0.351262 | 0.680507 | 0.512062 | 0.31895  | 0.439422 | 0.456638 | 0.51056  | 0.742612 | 0.75718  |
| Q15149 | Plectin (PC); PLEC PLEC1 | -0.15074 | -0.09259 | 0.414062 | 0.21482  | 0.192833 | 0.110424 | 0.218001 | 0.246722 | 0.365899 | 0.39902  |
| Q15154 | Pericentrio; PCM1        | -1       | -0.69849 | -0.4761  | -0.69574 | -0.91341 | -0.62654 | -1.06654 | -1.28936 | -1.21399 | -1.35908 |
| Q15170 | Transcripti; TCEAL1 SIF  | -1.02445 | -0.77649 | -1.06378 | -1.73697 | -0.68105 | -0.80599 | -1.17377 | -0.922   | -1.96585 | -1.99916 |
| Q15172 | Serine/thre; PPP2R5A     | 0.734539 | 0.744743 | 1.151613 | 0.981058 | 0.788104 | 1.112953 | 0.814645 | 1        | 1.214287 | 0.637114 |
| Q15181 | Inorganic p; PPA1 IOPPI  | 0.710309 | 0.52355  | 0.489405 | 0.338968 | 0.516725 | 0.299709 | 0.392333 | 0.305871 | 0.811941 | 0.978931 |
| Q15185 | Prostaglan; PTGES3 P2    | 0.171271 | 0.264168 | 0.854481 | 0.743225 | 0.81794  | 0.865499 | 0.638526 | 0.407678 | 0.858956 | 0.801019 |
| Q15208 | Serine/thre; STK38 NDR   | 0.329184 | 0.416986 | 0.189718 | -0.01894 | 0.258068 | 0.475242 | -0.04152 | 0.326501 | 0.181404 | 0.081724 |
| Q15233 | Non-POU d; NONO NRB      | -0.34792 | -0.09675 | 0.21092  | -0.22154 | 0.253767 | 0.356485 | 0.26984  | 0.303491 | 0.497782 | 0.320157 |
| Q15257 | Serine/thre; PTPA PPP2   | -0.08181 | 0.304633 | 0.150097 | 0.746231 | 0.389057 | 0.486535 | 0.76317  | 0.709017 | 0.44631  | 0.538001 |

|        |                                      |          |          |          |          |          |          |          |          |          |          |
|--------|--------------------------------------|----------|----------|----------|----------|----------|----------|----------|----------|----------|----------|
| Q15269 | Periodic try PWP2 PWP                | -2.3987  | -2.35716 | -3.24598 | -3.32193 | -3.01998 | -3.09095 | -3.05209 | -3.33342 | -2.35754 | -1.97589 |
| Q15276 | Rab GTPase RABEP1 RA                 | -0.01217 | -0.53754 | 0.006484 | -0.13472 | -0.05302 | -0.40612 | -0.09516 | -0.03477 | 0.197939 | 0.008824 |
| Q15283 | Ras GTPase RASA2 GAF                 | -0.15049 | -0.04423 | 0.008902 | -0.59224 | 0.035326 | 0.0555   | -0.0327  | -0.13727 | -0.09713 | -0.16155 |
| Q15286 | Ras-related RAB35 RAB                | 1.141356 | 1.030861 | 0.91983  | 0.64235  | 0.739937 | 0.877447 | 0.893872 | 0.817136 | 0.711279 | 0.573113 |
| Q15287 | RNA-binding RNPS1 LDC                | 0.744507 | 0.861549 | 0.880573 | 0.550835 | 0.942631 | 0.680172 | 0.870114 | 0.981464 | 1.223029 | 1.214627 |
| Q15291 | Retinoblast RBBP5 RBC                | 0.716207 | 0.288798 | -0.09777 | -0.08579 | 1.562478 | 1.548063 | 1.26984  | 1.014242 | 0.056806 | 0.084935 |
| Q15293 | Reticulocal RCN1 RCN                 | -0.61728 | -0.41898 | -0.61065 | -0.7475  | -1.22865 | -1.01955 | -0.71416 | -0.68421 | -0.69824 | -0.93964 |
| Q15311 | RalA-binding RALBP1 RLI              | -0.18746 | -0.2185  | -0.4761  | -0.32979 | -0.06853 | -0.51301 | -0.378   | -0.79737 | -0.74169 | -0.00443 |
| Q15326 | Zinc finger ZMYND11 I                | -0.60018 | -0.54209 | -0.67977 | -0.73529 | -0.37821 | -0.50017 | -0.63937 | -0.56764 | -0.43721 | -0.80642 |
| Q15334 | Lethal(2) gene LLGL1 DLG4            | -1.84329 | -1.14084 | -1.0994  | -1.37255 | -2.36268 | -1.17485 | -1.03437 | -1.18699 | -1.47212 | -1.15459 |
| Q15345 | Leucine-rich LRRC41 ML               | -3.03684 | -4.62449 | -2.28345 | -2.8011  | -2.69302 | -3.95693 | -3.55459 | -3.02308 | -2.16993 | -3.1008  |
| Q15363 | Transmembrane TMED2 RN               | -0.25096 | -0.58301 | -0.82743 | -0.18015 | -0.68105 | 0.029208 | -0.7214  | 0.067114 | -0.9445  | -1.0268  |
| Q15365 | Poly(rC)-binding PCBP1               | 0.310934 | 0.039707 | 0.130397 | -0.152   | -0.08713 | 0.212994 | 0.136573 | 0.531031 | 0.249944 | 0.199599 |
| Q15366 | Poly(rC)-binding PCBP2               | 0.380892 | 0.421717 | 0.312941 | 0.228219 | -0.58442 | -0.17529 | -0.06859 | -0.14179 | -0.12038 | -0.24885 |
| Q15369 | Elongin-C (ELOC) TCEB                | -2.12815 | -1.82602 | -1.78495 | -1.60965 | -1.58028 | -1.47742 | -2.80866 | -1.7286  | -1.45685 | -1.27385 |
| Q15370 | Elongin-B (ELOB) TCEB                | 1.442804 | 1.471434 | 1.558731 | 1.407175 | 1.45537  | 1.725444 | 1.693339 | 1.752341 | 1.4975   | 1.565657 |
| Q15388 | Mitochondrial TOMM20 K               | 0.763394 | 0.474243 | 0.744743 | 0.209792 | 0.648015 | 0.82905  | 0.500694 | 0.415037 | 0.658492 | 0.186547 |
| Q15393 | Splicing factor SF3B3 KIAA           | -0.0183  | 0.189718 | -0.1305  | -0.19444 | 0.041378 | -0.15577 | -0.25691 | -0.22909 | 0.069042 | 0.371017 |
| Q15404 | Ras suppressor RSU1 RSP1             | -1.04351 | -1.26654 | -0.53703 | -0.23816 | -1.77439 | -1.21056 | -0.41845 | -0.61973 | -2.12224 | -1.36859 |
| Q15418 | Ribosomal RPS6KA1 IV                 | -1.33018 | -0.65498 | -1.0097  | -1.4394  | -0.73936 | -2.02425 | -1.38751 | -2.44964 | -1.09769 | -1.49505 |
| Q15424 | Scaffold attachment SAFB HAP1        | 0.280108 | 0.378512 | 0.112475 | 0.091148 | 0.354283 | 0.184425 | 0.06502  | 0.284815 | 0.393664 | 0.356531 |
| Q15427 | Splicing factor SF3B4 SAP4           | 1.100987 | 0.96446  | 0.718619 | 0.914459 | 0.901297 | 0.773408 | 0.925073 | 0.924492 | 0.829441 | 0.616915 |
| Q15428 | Splicing factor SF3A2 SAP4           | -0.0332  | 0.484649 | 0.448351 | 0.878697 | 0.73969  | 0.481922 | 0.589988 | 0.559874 | 0.349942 | 0.625376 |
| Q15435 | Protein phosphatase PPP1R7 SD        | 0.234465 | 0.502042 | 0.391927 | 0.432284 | 0.216301 | 0.048363 | 0.387926 | 0.275386 | 0.411497 | 0.690191 |
| Q15436 | Protein translocator SEC23A          | -0.04307 | -0.00782 | -0.88753 | -1.02531 | -1       | -0.80599 | -0.44606 | -0.90046 | -0.67243 | -0.82517 |
| Q15437 | Protein translocator SEC23B          | 0.671236 | 0.772399 | 0.92805  | 0.580775 | 0.838879 | 0.889297 | 0.456638 | 0.817136 | -0.00946 | -0.20407 |
| Q15438 | Cytohesin-1 CYTH1 D17                | -0.83229 | -1.13056 | -0.14955 | -0.7381  | -1.86458 | -0.05176 | -0.13211 | -0.16107 | -0.26002 | -0.14962 |
| Q15459 | Splicing factor SF3A1 SAP4           | 0.580916 | 0.643276 | 0.437219 | 0.273451 | 0.405712 | 0.506353 | 0.368842 | 0.490326 | 0.499915 | 0.792422 |
| Q15477 | Helicase SK SKIV2L DD3               | -0.05302 | 0.208232 | -0.25331 | -0.40843 | 0.109013 | 0.068417 | 0.123576 | -0.05574 | 0.346996 | 0.514008 |
| Q15527 | Surfeit locus SURF2                  | 0.116409 | 0.375509 | 0.298341 | -0.18728 | 0.416895 | 0.41913  | 0.654865 | 0.222392 | 0.463711 | 0.081724 |
| Q15528 | Mediator component MED22 SUI         | 0.727234 | 0.790547 | 1.055458 | 0.626185 | 0.895942 | 0.717157 | 0.743092 | 0.905363 | 0.767752 | 0.853396 |
| Q15532 | Protein phosphatase SSX1 SS18 SSXT 3 | 2.248565 | 2.206711 | 2.388227 | 1.922694 | 2.18799  | 2.186827 | 2.379102 | 2.168652 | 2.508313 | 2.234355 |
| Q15542 | Transcription factor TAF5 TAF2L      | -0.30677 | -0.46682 | -0.2978  | -0.39941 | -0.37728 | -0.28421 | -0.4636  | -0.24739 | -0.08007 | -0.18697 |

|        |              |            |          |          |          |          |          |          |          |          |          |          |
|--------|--------------|------------|----------|----------|----------|----------|----------|----------|----------|----------|----------|----------|
| Q15545 | Transcriptio | TAF7 TAF2I | -0.9523  | -1.09675 | -0.99222 | -1.3377  | -0.9852  | -1.37197 | -1.08427 | -0.82753 | -1       | -1.03585 |
| Q15554 | Telomeric r  | TERF2 TRBI | -0.13619 | -0.04536 | -0.01908 | -0.46907 | -0.19573 | -0.17387 | 0.142779 | -0.20869 | 0.238266 | -0.14558 |
| Q15555 | Microtubul   | MAPRE2 RI  | 0.684331 | 0.687654 | 0.980152 | 0.828659 | 0.823785 | 0.58506  | 0.923061 | 0.864034 | 0.579913 | 0.87814  |
| Q15560 | Transcriptio | TCEA2      | -0.1669  | -0.45992 | -0.05971 | -0.20887 | -0.00746 | 0.016302 | -0.4957  | -0.24257 | -0.09248 | -0.26127 |
| Q15628 | Tumor necr   | TRADD      | -0.01374 | -0.06703 | 0.33894  | 0.219007 | 0.222595 | 0.137239 | 0.291591 | 0.275156 | -0.43715 | -0.6595  |
| Q15629 | Translocati  | TRAM1 TR   | 0.032665 | 0.14094  | 0.327417 | -0.2447  | -0.43965 | -0.17704 | 0.225737 | -0.00503 | -0.59667 | -0.37384 |
| Q15631 | Translin (E  | TSN        | 0.102359 | 0.305418 | -0.02451 | 0.86824  | 0.962996 | 0.762155 | 0.654154 | 0.815722 | 0.450945 | 0.14952  |
| Q15637 | Splicing fac | SF1 ZFM1 Z | -0.24125 | -0.19006 | -0.17631 | -0.36746 | -0.36075 | -0.4119  | -0.25691 | -0.15758 | 0.192019 | 0.256899 |
| Q15642 | Cdc42-inte   | TRIP10 CIP | -3.19438 | -2.38163 | -2.32193 | -3.84549 | NA       | NA       | -3.3322  | -2.93289 | -2.23502 | -3.0268  |
| Q15646 | 2'-5'-oligoa | OASL TRIP1 | -0.71491 | -1.1305  | -1.06378 | -1.2909  | -1.37109 | -1.16175 | -1.60039 | -1.26303 | -1.88235 | -2.32636 |
| Q15648 | Mediator o   | MED1 ARC   | -1.35566 | -1.11353 | -1.30256 | -1.3377  | -0.91341 | -1.17403 | -1.73016 | -1.29078 | -1.10764 | -1.2507  |
| Q15650 | Activating s | TRIP4      | -1.04854 | -1.05058 | -0.84866 | -0.481   | -0.69523 | -0.90431 | -1.05653 | -1.04025 | -1.37743 | -1.06318 |
| Q15651 | High mobil   | HMG3 TR    | 0.597035 | 0.59274  | -0.20495 | 0.15451  | 1.519028 | 1.70044  | -0.01543 | -0.28962 | 1.320041 | 1.223024 |
| Q15653 | NF-kappa-E   | NFKBIB IKB | 1.672893 | 1.888249 | 1.773198 | 1.66615  | 1.626594 | 1.572162 | 1.606466 | 1.745863 | 1.312008 | 1.35972  |
| Q15691 | Microtubul   | MAPRE1     | 0.886542 | 0.574527 | 0.917984 | 0.778483 | 0.966141 | 0.573991 | 0.724635 | 0.246722 | 0.597201 | 0.885486 |
| Q15696 | U2 small nt  | ZRSR2 U2A  | 0.171271 | 0.363436 | 0.27275  | 0.294061 | 0.564994 | 0.31755  | 0.532874 | 0.61891  | 0.327575 | 0.106599 |
| Q15697 | Zinc finger  | ZNF174 ZSK | -2.68536 | -1.93147 | -2.42286 | -3.67557 | -2.35199 | -1.83494 | -1.41163 | -2.72935 | -2.04793 | -1.73402 |
| Q15717 | ELAV-like p  | ELAVL1 HU  | 0.088435 | -0.31221 | -0.04757 | -0.23816 | 0.062459 | 0.048363 | -0.06825 | -0.08246 | 0.023383 | 0.11867  |
| Q15750 | TGF-beta-a   | TAB1 MAP   | -3.89482 | -3.72403 | -3.36146 | -4.14505 | -3.51245 | -2       | -3.3322  | -3.27684 | -2.28011 | -3.44184 |
| Q15773 | Myeloid let  | MLF2       | -0.76553 | -0.57138 | -1.26459 | -0.82312 | -0.81855 | -0.86449 | -0.94973 | -1.34792 | -0.77357 | -0.84888 |
| Q15785 | Mitochond    | TOMM34 L   | -1.01217 | -0.97679 | -0.59474 | -0.63604 | -0.7051  | -0.79647 | -1.34514 | -1.33342 | -0.96277 | -0.98241 |
| Q15796 | Mothers ag   | SMAD2 MA   | -2.26348 | -2.54777 | -1.87949 | -1.95748 | -2.1163  | -2.18727 | -2.14237 | -2.00529 | -2.09713 | -1.62622 |
| Q15814 | Tubulin-sp   | TBCC       | -0.44361 | 0.087004 | -0.16506 | -0.47045 | -0.27798 | -0.42968 | -0.10063 | -0.20249 | -0.07748 | -0.52855 |
| Q15819 | Ubiquitin-c  | UBE2V2 MI  | 1.241889 | 1.092962 | 1.375641 | 1.542863 | 1.553527 | 1.505868 | 1.3623   | 1.37811  | 1.787957 | 1.935127 |
| Q15833 | Syntaxin-bi  | STXBP2 UN  | -0.38711 | -0.34827 | -0.51457 | -0.32193 | -0.54463 | 0.058894 | -0.62372 | -0.55063 | -0.99365 | -0.97915 |
| Q15836 | Vesicle-ass  | VAMP3 SYE  | -3.43539 | -2.60064 | -1.96153 | -2.0126  | -2.55552 | -2.91511 | -2.9301  | -2.16993 | -2.23502 | -1.58054 |
| Q15848 | Adiponecti   | ADIPOQ AC  | 1.690145 | 1.471434 | 1.416986 | 0.349267 | 0.7175   | 1.328471 | 1.880039 | 0.941583 | 0.619129 | 1.019778 |
| Q15853 | Upstream s   | USF2 BHLH  | -2.50619 | -2.42635 | -2.91039 | -1.93063 | -0.77973 | -1.26303 | -2.25298 | -2.43388 | -0.91754 | -0.9141  |
| Q15906 | Vacuolar pi  | VPS72 TCFI | -3.30986 | -1.87317 | -2.10512 | -2.9386  | -3.69302 | -1.75899 | -3.38466 | -1.78746 | -2.25739 | -2.37145 |
| Q15907 | Ras-relatec  | RAB11B YP  | -0.29947 | 0.004953 | 0.105491 | 0.01227  | 0.048434 | -0.20107 | -0.22544 | -0.28832 | -0.25263 | 0.005111 |
| Q15942 | Zyxin (Zyxir | ZYX        | -0.27277 | -0.35506 | 0.390459 | -0.25865 | -0.33209 | -0.08599 | -0.24938 | -0.36234 | -0.00472 | 0.209693 |
| Q16134 | Electron tr  | ETFDH      | -0.21534 | -0.25061 | -0.58301 | -0.22344 | -0.74193 | 0.016302 | -0.41163 | -0.65535 | -0.55003 | -0.79414 |
| Q16181 | Septin-7 (C  | SEPTIN7 CE | -0.13993 | 0.095745 | 0.152411 | 0.006259 | 0.14828  | 0.155278 | 0.015267 | -0.13444 | 0.189695 | 0.090064 |

|        |             |          |       |          |          |          |          |          |          |          |          |          |          |
|--------|-------------|----------|-------|----------|----------|----------|----------|----------|----------|----------|----------|----------|----------|
| Q16186 | Proteasom   | ADRM1    | GP    | -1       | -1.14138 | -0.84488 | -0.7245  | -0.57755 | -0.25196 | -0.18536 | -0.7189  | -0.58496 | -0.71937 |
| Q16204 | Coiled-coil | CCDC6    | D10   | -1.60249 | -1.27623 | -1.10557 | -1.58065 | -0.91511 | -1.43044 | -1.05794 | -0.93494 | -1.51726 | -1.08    |
| Q16254 | Transcripti | E2F4     |       | -0.86675 | -0.83427 | -0.21941 | -0.2663  | -0.11181 | -0.1545  | -0.55014 | -0.33766 | -0.21873 | 0.011581 |
| Q16401 | 26S protea  | PSMD5    | KIA   | 0.485852 | 0.429275 | 0.7314   | 0.647325 | 0.566307 | 0.810512 | 0.463066 | 0.727078 | 0.941163 | 1.116431 |
| Q16512 | Serine/thre | PKN1     | PAK1  | -0.41722 | -0.18507 | -0.29556 | -0.18702 | -0.23087 | -0.57277 | -0.41052 | -0.5876  | -0.39073 | -0.30926 |
| Q16514 | Transcripti | TAF12    | TAF   | 0.430035 | 0.538899 | 0.536398 | 0.544235 | 0.501493 | 0.658123 | 0.474435 | 0.64333  | 0.780446 | 0.47296  |
| Q16531 | DNA damağ   | DDB1     | XAP1  | 0.455795 | 0.654643 | 0.172676 | 0.259617 | 0.346395 | 0.247911 | 0.201905 | 0.019101 | 0.43291  | 0.348239 |
| Q16537 | Serine/thre | PPP2R5E  |       | -2.89482 | -2.57719 | -3.24598 | -3.32193 | NA       | NA       | -3.61599 | -2.27684 | -3.45003 | -3.76377 |
| Q16539 | Mitogen-ac  | MAPK14   | C     | 0.540882 | 0.61705  | -0.02618 | -0.10407 | -0.46004 | -0.29491 | -0.10947 | -0.12683 | -0.41143 | -0.09878 |
| Q16543 | Hsp90 co-c  | CDC37    | CDC   | 1.024045 | 0.915702 | 1.175978 | 1.13179  | 1.124601 | 1.005454 | 0.921145 | 1.011405 | 1.258203 | 1.194304 |
| Q16555 | Dihydropyr  | DPYSL2   | CRI   | -0.63743 | -0.39696 | -0.11775 | -0.34564 | -0.63413 | -0.52083 | -0.43911 | -0.6735  | -0.45003 | -0.52218 |
| Q16560 | U11/U12 sı  | SNRNP35  | F     | -3.03684 | -3.72403 | -2.57719 | -1.84549 | -2.74193 | -3.04439 | -3.18536 | -2.93289 | -3.3505  | -2.30433 |
| Q16563 | Synaptoph   | SYPL1    | SYPL  | 0.144101 | 0.030861 | -0.03953 | 0.977877 | 0.739937 | 0.439422 | 0.08445  | 1.421464 | -0.03339 | 0.783129 |
| Q16566 | Calcium/ca  | CAMK4    | CAI   | -0.22302 | -0.30896 | 0.037224 | 0.397684 | -0.00879 | 0.194438 | 0.417193 | 0.256642 | 0.375067 | 0.480043 |
| Q16576 | Histone-bir | RBBP7    | RBA   | 0.333608 | 0.356539 | 0.23017  | 0.260844 | 0.174874 | 0.458287 | 0.299241 | 0.56642  | 0.553184 | 0.543056 |
| Q16594 | Transcripti | TAF9     | TAF2  | -1.38702 | -0.73697 | -0.83094 | -1.06413 | -0.56649 | -0.68684 | -0.62385 | -0.6644  | -0.96277 | -0.53495 |
| Q16595 | Frataxin, m | FXN      | FRDA  | 1.546253 | 1.686034 | 0.112493 | 0.543067 | 0.289536 | 0.519391 | 0.370222 | 0.236769 | 0.244053 | 0.313217 |
| Q16611 | Bcl-2 homc  | BAK1     | BAK1  | -2.11872 | -2.15019 | -2.69716 | -2.68228 | -2.95606 | -2.28114 | -2.13885 | -2.5561  | -1.39941 | -1.13927 |
| Q16629 | Serine/argi | SRSF7    | SFRS  | -0.08746 | 0.108863 | 0.165586 | -0.17661 | -0.2076  | -0.44448 | -0.07346 | -0.39985 | -0.16993 | 0.29873  |
| Q16630 | Cleavage aı | CPSF6    | CFIV  | -0.49028 | -0.41017 | -0.578   | -0.44965 | -0.46454 | -0.58723 | -0.4193  | -0.61586 | -0.41358 | -0.14203 |
| Q16637 | Survival m  | SMN1     | SMN   | -0.94062 | -1.16506 | -0.8519  | -0.7794  | -0.81855 | -0.82523 | -1.03103 | -1.55102 | -1.31487 | -1.22979 |
| Q16643 | Drebrin (D  | DBN1     | DOS1  | -2.47758 | -1.469   | -1.46545 | -0.89197 | -1.13251 | -0.8933  | -0.69214 | -0.68117 | -1.40204 | -1.11799 |
| Q16644 | MAP kinas   | MAPKAPK3 |       | -0.61869 | -0.58301 | -0.53138 | -0.50564 | -0.64572 | -0.50524 | -0.36476 | -0.55943 | -0.28011 | -0.41209 |
| Q16656 | Nuclear res | NRF1     |       | -0.35566 | -0.55984 | -0.50348 | -0.48794 | -0.50188 | -0.35789 | -0.30035 | -0.41504 | -0.22396 | -0.53495 |
| Q16666 | Gamma-int   | IFI16    | IFNG1 | 0.514573 | 0.165586 | 0.510189 | 0.501498 | 0.154975 | 0.096281 | 0.269722 | 0.20884  | -0.05282 | -0.24544 |
| Q16698 | 2,4-dienoyl | DEC1     | DEC   | 0.381307 | 0.63101  | 0.571047 | 0.543409 | 0.06614  | 0.335723 | 0.406977 | 0.351236 | 0.661478 | 0.258722 |
| Q16718 | NADH dehy   | NDUFA5   |       | 1.930141 | 2.002921 | 2.0925   | 1.957026 | 2.287308 | 1.735325 | 1.976793 | 1.903834 | 2.401716 | 2.123963 |
| Q16740 | ATP-depen   | CLPP     |       | -0.06707 | -0.18709 | 0.162105 | -0.03814 | -0.1487  | -0.18021 | 0.122543 | 0.217477 | 0.009399 | 0.232472 |
| Q16773 | Kynurenine  | KYAT1    | CCB   | -0.26546 | 0.038474 | -0.55984 | -0.27563 | -0.87199 | -0.35091 | -0.6477  | -0.62855 | -0.22948 | -0.14906 |
| Q16774 | Guanylate   | GUK1     | GMK   | 0.233097 | 0.298975 | 0.454059 | 0.176397 | 0.466317 | 0.408229 | 0.637983 | 0.553764 | 0.564188 | 0.334228 |
| Q16775 | Hydroxyac   | HAGH     | GLO   | -0.50368 | -0.46554 | -0.01633 | -0.4386  | -0.04534 | -0.08543 | -0.09305 | -0.0444  | 0.140784 | 0.093464 |
| Q16777 | Histone H2  | H2AC20   | H2    | -1.74236 | -0.84149 | 0.045988 | 0.237327 | 0.35868  | -0.30531 | 0.327709 | 0.46664  | -0.65974 | 0.652943 |
| Q16778 | Histone H2  | H2BC21   | H2    | -1.03684 | -1.23676 | 1.424268 | 1.359081 | 1.18799  | 1.386058 | 1.584963 | 1.268273 | 1.130629 | 1.161047 |

|        |                        |          |          |          |          |          |          |          |          |          |          |
|--------|------------------------|----------|----------|----------|----------|----------|----------|----------|----------|----------|----------|
| Q16795 | NADH dehyd NDUFA9 NI   | 0.996582 | 1.191439 | 0.961242 | 0.931943 | 0.567198 | 0.932221 | 1.072083 | 0.996036 | 0.855108 | 0.959546 |
| Q16822 | Phosphoen PCK2 PEPC    | -1.76524 | -2.23644 | -0.29776 | -0.38606 | -1.99154 | -2.44028 | -0.04152 | 0.028345 | -2.09755 | -2.09051 |
| Q16831 | Uridine pho UPP1 UP    | 0.523035 | 0.566651 | 0.390459 | 0.225972 | 0.161638 | 0.295456 | 0.26559  | 0.340133 | 0.206137 | 0.455403 |
| Q16836 | Hydroxyacyl HADH HAD   | 0.38809  | 0.550431 | 0.860936 | 0.181558 | 0.749107 | 1.095157 | 0.522838 | 0.812078 | 1.119116 | 0.79593  |
| Q16851 | UTP--gluco UGP2 UGP    | 1.013777 | 0.655971 | 0.477047 | 0.547006 | 0.589912 | 0.649093 | 0.397587 | 0.340133 | 0.848521 | 1.139112 |
| Q16854 | Deoxyguan DGUOK DG     | -2.06193 | -2.03953 | -1.75002 | -1.7794  | -3.69302 | -1.79647 | -2.09516 | -2.88982 | -1.7028  | -1.70487 |
| Q16864 | V-type prot ATP6V1F A  | -0.75527 | -0.59474 | -0.96153 | -0.70594 | -1.37109 | -1.1375  | -0.58811 | -0.53269 | -0.9445  | -0.84093 |
| Q16875 | 6-phospho PFKFB3       | -2.10516 | -1.69616 | -2.15645 | -2.66233 | -1.74926 | -1.65065 | -2.26023 | -2.35213 | -2.6018  | -1.5353  |
| Q16881 | Thioredoxin TXNRD1 GF  | 1.06089  | 0.955142 | 0.836925 | 0.813154 | 0.929368 | 1.031382 | 0.951714 | 0.844345 | 0.527355 | 0.590178 |
| Q16891 | MICOS com IMMT HMF     | 0.299939 | 0.625965 | 0.343262 | 0.439171 | 0.331666 | 0.340888 | 0.464603 | 0.559718 | 0.139781 | 0.254373 |
| Q17R31 | Putative de TATDN3     | -2.03684 | -2.38163 | -1.4021  | -1.54171 | -2.64572 | -1.65208 | -1.96963 | -1.63743 | -1.47603 | -1.1589  |
| Q1KMD3 | Heterogen HNRNPUL2     | 0.27001  | 0.491081 | 0.424451 | 0.294061 | 0.575013 | 0.679634 | 0.686479 | 0.704729 | 0.54686  | 0.419456 |
| Q27J81 | Inverted fo INF2 C14or | -0.8797  | -0.81206 | -0.49351 | -0.78772 | -0.08475 | 0.000683 | -0.30904 | -0.18616 | -0.04325 | 0.158979 |
| Q29RF7 | Sister chro PDS5A KIA  | -0.68116 | -0.83967 | -0.83094 | -0.48276 | -0.62136 | -0.62654 | -0.90115 | -0.74897 | -0.7489  | -0.56737 |
| Q2KHT3 | Protein cle CLEC16A KI | -0.02445 | -0.10512 | 0.015513 | -0.17306 | 0.072512 | 0.079727 | -0.10063 | 0.303491 | 0.09134  | 0.052151 |
| Q2M2I8 | AP2-associ AAK1 KIAA   | -1.52507 | -1.34474 | -1.35426 | -1.49332 | -1.09806 | -1.03243 | -1.34801 | -1.10235 | -1.01898 | -1.38294 |
| Q2NL82 | Pre-rRNA-p TSR1 KIAA1  | 0.503272 | 0.467881 | 0.433568 | 0.316213 | 0.446466 | 0.836992 | 0.883443 | 0.826638 | 0.210016 | -0.13601 |
| Q2PZ11 | Probable C DPY19L1 G   | -0.73495 | -1.46529 | -1.33171 | -0.41086 | -0.87199 | -0.59318 | -1.20881 | 0.207595 | -0.45649 | -0.42392 |
| Q2TAA2 | Isoamyl ac IAH1        | 1.567374 | 1.633751 | 0.800934 | 1.234105 | 1.13149  | 1.700455 | 1.098968 | 1.01394  | 1.38135  | 1.123358 |
| Q2TAL8 | Glutamine- QRICH1      | -1.12663 | -1.27399 | -1.81714 | -1.67557 | -1.66918 | -2.11366 | -1.74723 | -1.93289 | -1.73383 | -1.28264 |
| Q2TAY7 | WD40 repe SMU1         | 0.60874  | 0.327734 | 0.894883 | 0.674146 | 0.766409 | 0.944291 | 0.797087 | 1.083416 | 1.164677 | 1.021959 |
| Q2TBE0 | CWF19-like CWF19L2     | -0.9523  | -1.32193 | -0.88753 | -0.87971 | -0.69302 | -1.33015 | -0.91073 | -0.73888 | -0.67996 | -1.03585 |
| Q32MZ4 | Leucine-ric LRRFIP1 GC | -0.28011 | -0.18709 | 0.329705 | -0.20287 | 0.161638 | -0.05094 | -0.56212 | -0.01728 | 0.060025 | -0.1008  |
| Q32NC0 | UPF0711 p C18orf21 X   | -1.78629 | -1.50901 | -1.5656  | -1.61667 | -1.57755 | -1.61813 | -1.96963 | -1.58496 | -1.46297 | -1.66223 |
| Q32P44 | Echinoderm EML3        | -1.242   | -0.85271 | -0.31221 | -0.3377  | -0.87611 | -0.92244 | -0.18536 | -0.26303 | -0.69194 | -0.5468  |
| Q3B726 | DNA-direct POLR1F TM   | -0.51978 | -0.10512 | -0.33171 | -0.19444 | -0.42    | 0.155278 | -0.25691 | -0.14439 | -0.38087 | -1.11032 |
| Q3B7J2 | Glucose-frt GFOD2 UN   | -1.82873 | -2.03953 | -1.94642 | -3.14505 | -2.59991 | -1.75899 | -2.11718 | -2.848   | -1.95361 | -1.45391 |
| Q3B7T1 | Erythroid d EDRF1 C10  | 0.944386 | 1.240108 | 1.77468  | 1.672179 | 1.669214 | 1.477206 | 1.741563 | 1.820382 | 1.659984 | 1.679178 |
| Q3KQU3 | MAP7 dom MAP7D1 KI     | -2.57289 | -1.84488 | -1.5212  | -1.29944 | -1.81855 | -1.91511 | -2.04156 | -1.48864 | -1.89556 | -1.1589  |
| Q3KQV9 | UDP-N-ace UAP1L1       | -1.1669  | -1.63656 | -3.72403 | -4.84549 | -2.64572 | -1.93587 | -1.58496 | -1.53434 | -1.5025  | -1.84093 |
| Q3LXA3 | Triokinase/ TKFC DAK   | -1.47755 | -0.93768 | -1.17824 | -2.21415 | -0.87363 | -0.79749 | -1.73447 | -2.79248 | -0.9163  | -0.6335  |
| Q3MHD2 | Protein LSM LSM12      | 0.229304 | 0.199938 | 1.20502  | 1.034093 | 1.134797 | 0.989029 | 0.942598 | 0.982722 | 1.456858 | 1.482579 |
| Q3SXM5 | Inactive hy HSDL1 SDR  | -1.32496 | -0.91667 | -0.44392 | -0.71621 | -0.75442 | -1.27621 | -1.39808 | -1.09464 | -0.96277 | -0.93934 |

|        |                     |            |          |          |          |          |          |          |          |          |          |          |
|--------|---------------------|------------|----------|----------|----------|----------|----------|----------|----------|----------|----------|----------|
| Q3YEC7 | Rab-like pr         | RABL6 C9o  | -0.09392 | -0.12624 | 0.308355 | 0.308759 | 0.010881 | 0.039335 | 0.248466 | 0.246907 | 0.266089 | 0.348838 |
| Q3ZCM7 | Tubulin bet         | TUBB8      | 0.646137 | 0.695415 | 0.884887 | 0.622587 | 0.878116 | 0.783455 | 1.036522 | 0.747077 | 0.63278  | 0.678701 |
| Q3ZCQ8 | Mitochond           | TIMM50 TI  | -1.39286 | -1.40072 | -0.82437 | -0.66562 | -0.75535 | -0.97475 | -1.07113 | -0.81727 | -0.66327 | -0.92986 |
| Q460N5 | Protein mo          | PARP14 BA  | -0.11346 | -0.51457 | -0.05971 | -0.26806 | -0.41009 | -0.24349 | -0.51019 | -0.97728 | -0.36257 | -0.22461 |
| Q49A26 | Putative ox         | GLYR1 HIBI | 0.974858 | 0.895148 | 0.790547 | 0.785929 | 0.761284 | 0.958594 | 0.877633 | 0.784497 | 0.969024 | 0.617409 |
| Q49AR2 | UPF0489 p           | C5orf22    | -0.51978 | -0.7632  | -0.53138 | -0.59756 | -0.38074 | -0.85457 | -0.44606 | -0.48543 | -0.55003 | -0.52218 |
| Q4G0F5 | Vacuolar pi         | VPS26B     | -0.09565 | 0.194546 | -0.50567 | -0.24969 | -0.24774 | -0.27397 | -0.37918 | -0.16356 | -1.12508 | -0.81209 |
| Q4G0I0 | Protein CC          | CCSMST1 C  | 0.218924 | -0.29298 | 0.034673 | -0.0973  | 0.072512 | -0.10776 | 0.108376 | -0.06439 | 0.185556 | -0.1589  |
| Q4G0J3 | La-related          | LARP7 HDC  | 0.03592  | 0.206711 | 0.540081 | 0.268252 | 0.072512 | 0.189226 | -0.30666 | -0.2091  | 0.446516 | -0.03132 |
| Q4G0N4 | NAD kinase          | NADK2 C5c  | -1.41772 | -1.70552 | -1.42757 | -2.01282 | -1.35775 | -0.65945 | -0.6866  | -0.77858 | -1.80809 | -0.89867 |
| Q4G163 | F-box only          | FBXO43 EN  | 0.203839 | 0.738868 | 1.056822 | 1.39097  | 2.223166 | 1.889505 | 1.061147 | 1.448979 | 1.560539 | 1.48379  |
| Q4G176 | Malonate--          | ACSF3 PSEC | -0.87682 | -1.25035 | -0.94454 | -1.41031 | 0.871762 | 0.964035 | -0.85119 | -1.03797 | 0.814075 | 0.751934 |
| Q4KMP7 | TBC1 domæ           | TBC1D10B   | -0.83954 | -0.36146 | 0.220163 | 0.209792 | -0.15697 | -0.21785 | -0.27537 | -0.32623 | 0.368321 | 0.351712 |
| Q4KMQ2 | Anoctamin           | ANO6 TME   | 0.059379 | -0.19153 | -0.13478 | 0.182416 | -0.10007 | 0.203533 | 0.117836 | 0.303491 | -0.44361 | -0.61402 |
| Q4LE39 | AT-rich int         | ARID4B BR  | -1.32822 | -1.15197 | -0.70865 | -0.35981 | -0.6755  | -0.74482 | -1.0155  | -1.33936 | -0.69873 | -0.45305 |
| Q4V328 | GRIP1-asso          | GRIPAP1 KI | -1.5025  | -1.26459 | -0.83377 | -1.0906  | -1.29613 | -1.07677 | -0.86343 | -0.86876 | -0.7028  | -0.99118 |
| Q4VC31 | Coiled-coil         | CCDC58     | 0.371969 | 0.451612 | 0.137504 | 0.354182 | 0.539639 | -0.08439 | 0.598541 | 0.126008 | 0.473931 | 0.590851 |
| Q52LJ0 | Protein FAI         | FAM98B     | -0.14852 | -0.75659 | 0.101614 | 0        | -0.19903 | 0.352211 | 0.301824 | 0.199138 | 0.457381 | 0.284267 |
| Q53EL6 | Programmæ           | PDCD4 H7E  | -0.16561 | -0.22458 | -0.06378 | -0.26053 | -0.25118 | -0.26961 | -0.30666 | -0.39985 | -0.71049 | -0.30981 |
| Q53ET0 | CREB-regul          | CRTC2 TOR  | -1.89482 | -1.4021  | -2.5541  | -3.32193 | -1.66918 | -1.87447 | -1.61599 | -1.56789 | -2.39941 | -1.70487 |
| Q53F19 | Nuclear ca          | NCBP3 C17  | -1.17779 | -1.22554 | -1.5427  | -1.45317 | -1.29589 | -1.41158 | -1.42313 | -1.36705 | -1.47734 | -1.26127 |
| Q53GL7 | Protein mo          | PARP10     | -0.91509 | -0.96103 | -1.1639  | -1.19101 | -1.55762 | -1.63469 | -0.69075 | -0.78199 | -1.46632 | -1.62609 |
| Q53GQ0 | Very-long- $\alpha$ | HSD17B12   | -0.37912 | -0.65486 | -0.34651 | -0.7794  | -0.53382 | -0.2962  | -0.46007 | -0.6644  | -1.01898 | -1.87299 |
| Q53GS7 | Nucleopori          | GLE1 GLE1I | -3.80735 | -2.44392 | NA       | NA       | -3.2076  | -4.04439 | -2.89162 | -3.27684 | -2.06756 | -3.21945 |
| Q53GS9 | U4/U6.U5            | USP39 CGI- | 0.905643 | 0.950081 | 0.970487 | 0.835589 | 0.648966 | 0.689755 | 0.880304 | 0.838806 | 0.975332 | 0.932043 |
| Q53H12 | Acylglycerc         | AGK MULK   | -0.53727 | -0.78319 | -0.58301 | -0.73697 | -1.12418 | -0.89465 | -0.9898  | -0.95491 | -1.2687  | -1.09134 |
| Q53H47 | Histone-lys         | SETMAR     | 0.36257  | 0.610726 | 0.137504 | 0.618034 | 0.051139 | 0.203533 | 0.332124 | 0.506536 | 0.304855 | 0.709264 |
| Q53QV2 | Protein LBI         | LBH        | -1.04814 | -0.68596 | -1.52259 | -1.41978 | -1.54003 | -1.50758 | -1.32081 | -1.53549 | -1.92797 | -1.78929 |
| Q53QZ3 | Rho GTPas           | ARHGAP15   | -0.56957 | -0.24788 | -0.45937 | -0.46136 | -0.29941 | -0.31673 | -0.41907 | -0.40842 | -0.29749 | -0.42726 |
| Q562E7 | WD repeat           | WDR81      | -1.01217 | -1.4761  | -0.97679 | -0.89129 | -0.06075 | -0.4975  | -0.61599 | -0.60224 | 0.069042 | -0.13441 |
| Q562R1 | Beta-actin-         | ACTBL2     | 1.406448 | 1.102579 | 1.276633 | 1.750234 | 1.685141 | 1.541584 | 1.113289 | 1.760401 | 1.332912 | 1.790095 |
| Q567U6 | Coiled-coil         | CCDC93     | -0.53621 | -0.64947 | -0.42692 | -0.26361 | -0.19717 | -0.21782 | -0.37859 | -0.91707 | -0.18671 | -0.10322 |
| Q56VL3 | OCIA doma           | OCIAD2     | -1.70499 | -2.20945 | -2.32193 | -2.98751 | -2.74193 | -3.40054 | NA       | NA       | -2.3505  | -1.69052 |

|        |                         |          |          |          |          |          |          |          |          |          |          |
|--------|-------------------------|----------|----------|----------|----------|----------|----------|----------|----------|----------|----------|
| Q5BJF6 | Outer dens ODF2         | -1.09882 | -0.62638 | -0.24302 | -0.00861 | -0.41283 | -0.50711 | -0.6256  | -0.47412 | -0.43394 | -0.40651 |
| Q5BKU9 | Oxidoreduc OXLD1 C17    | 0.053549 | 0.419903 | 0.58756  | 0.572362 | 0.570012 | 0.703799 | 0.595158 | 0.648429 | 1.069042 | 0.991122 |
| Q5C9Z4 | Nucleolar NOM1 C7o      | -0.46855 | -0.46529 | -0.69849 | -0.23816 | -0.66918 | -0.38618 | -0.60817 | -0.22909 | -0.60634 | -1.04495 |
| Q5EBM0 | UMP-CMP CMPK2           | 0.506062 | 0.26628  | 0.101614 | 0.120294 | -0.27798 | 0.490881 | 0.074768 | -0.02891 | 0.770518 | 1.052151 |
| Q5EG05 | Caspase re CARD16 CC    | -0.0646  | -0.16522 | -0.0473  | -0.34356 | -0.22755 | -0.1745  | -0.12443 | -0.18497 | -0.24587 | -0.34762 |
| Q5F1R6 | DnaJ homo DNAJC21 D     | -0.89482 | -0.76983 | -0.4761  | -0.49676 | -0.53382 | -0.93587 | -0.5697  | -0.45372 | -0.2687  | -0.10555 |
| Q5GLZ8 | Probable E HERC4 KIA    | 0.42711  | 0.285602 | 0.468619 | -0.05759 | -0.02248 | 0.415037 | 0.411195 | 0.340133 | 0.323813 | 0.320157 |
| Q5H9R7 | Serine/thre PPP6R3 C1   | -1.30549 | -1.52529 | -0.5252  | -1.00005 | -1.22634 | -1.30653 | -0.8442  | -1.27192 | -0.74001 | -0.71574 |
| Q5HYI8 | Rab-like pr RABL3       | 1.552881 | 1.565506 | 1.533183 | 1.364367 | 1.505104 | 1.4738   | 1.264612 | 1.386574 | 1.349781 | 1.432695 |
| Q5HYJ3 | Protein FAI FAM76B      | -0.28011 | -0.08017 | -2.26459 | -2.84549 | -1.26747 | -1.44809 | -1.39212 | -1.67085 | -1.4209  | -1.10818 |
| Q5HYW2 | NHS-like pr NHSL2       | -1.56393 | -1.17201 | -0.47651 | -0.77683 | -0.58054 | -0.88852 | -0.84233 | -0.50602 | -2.45164 | -1.6028  |
| Q5J8M3 | ER membræ EMC4 TME      | -1.28622 | -0.77362 | -1.53837 | -1.64746 | -2.16937 | -1.55397 | -1.45858 | -1.77925 | -2.22401 | -1.72669 |
| Q5JPI9 | EEF1A lysin EEF1AKMT    | -0.5285  | -0.35147 | -0.5427  | -0.23816 | -0.66918 | -0.37197 | -0.23868 | -0.43812 | -1.01898 | -1.0726  |
| Q5JRA6 | Transport æ MIA3 KIAA   | -0.75527 | -0.43335 | -0.31706 | -0.26806 | -0.5231  | 0.154002 | -0.45305 | -0.55943 | -0.81444 | -0.51584 |
| Q5JRX3 | Presequenç PITRM1 KIA   | 0.385953 | 0.275973 | 0.295167 | -0.18015 | -0.32949 | -0.20134 | 0.76433  | 0.565752 | 0.168877 | -0.2402  |
| Q5JS54 | Proteasom PSMG4 C6c     | -1.1004  | -1.5427  | -1.85896 | -1.0906  | -0.97056 | -1.52083 | -1.91073 | -1.18286 | -1.39941 | -1.2402  |
| Q5JSH3 | WD repeat WDR44         | -0.12487 | -0.32914 | -0.31221 | -0.62632 | -0.48054 | -0.23195 | -0.53996 | -0.42764 | -0.23685 | -0.31401 |
| Q5JSL3 | Dedicator ç DOCK11 ZL   | -0.30986 | -0.4761  | 0.157901 | 0.097024 | 0.029444 | -0.0614  | -0.14172 | 0.055091 | -0.07756 | 0.075852 |
| Q5JSP0 | FYVE, Rhoç FGD3 ZFYV    | -0.18057 | -0.13906 | 0.199938 | -0.03814 | 0.200987 | 0.286523 | 0        | -0.17638 | 0.422092 | 0.284267 |
| Q5JSZ5 | Protein PRI PRRC2B BA   | -3.98793 | -4.28345 | -1.41244 | -3.84549 | -3.14048 | -1.81558 | -1.9898  | -1.61973 | -1.848   | -2.1008  |
| Q5JTD0 | Tight juncti TJAP1 PILT | -3.55861 | -2.92089 | -2.2461  | -3.17557 | -3.14048 | -2.02203 | -1.9898  | -2       | -2.76553 | -2.38004 |
| Q5JTH9 | RRP12-like RRP12 KIA    | 0.195964 | 0.023496 | -0.21708 | -0.4278  | -0.09862 | 0.021686 | -0.00031 | 0.02834  | -0.21395 | -0.18925 |
| Q5JTJ3 | Cytochrom COA6 C1or     | -1.54089 | -1.15879 | -1.38878 | -1.74253 | -2.03885 | -1.67667 | -1.61688 | -1.54197 | -1.76573 | -1.04537 |
| Q5JTV8 | Torsin-1A-i TOR1AIP1 I  | -0.24022 | -0.0056  | -0.41209 | -0.40255 | -0.1144  | 0.040353 | -0.43219 | -0.64636 | -0.38762 | -0.64895 |
| Q5JTZ9 | Alanine--tr AARS2 AAR   | -0.818   | -0.81714 | -0.31221 | 0.593302 | -0.62263 | -0.23704 | -0.3322  | -0.71989 | -0.5025  | -0.62763 |
| Q5JVf3 | PCI domair PCID2 HT0c   | 0.45547  | 0.48963  | -0.25558 | 0.207168 | -0.23256 | 0.233904 | 0.229653 | 0.17345  | -0.41911 | -0.41293 |
| Q5JVS0 | Intracellula HABP4      | -0.36344 | -0.16069 | -0.08017 | -0.45317 | 0.128008 | 0.105353 | 0.098853 | -0.12553 | 0.032631 | 1.037134 |
| Q5JXB2 | Putative uk UBE2NL      | -0.22239 | 0.01165  | -1.49796 | -0.7794  | -0.66918 | -0.50524 | -0.21474 | -0.39232 | -1.24616 | -0.60054 |
| Q5K651 | Sterile alph SAMD9 C7c  | 0.223066 | 0.186266 | 0.169379 | -0.12159 | 0.103787 | 0.202885 | 0.088947 | 0.192967 | 0.220041 | 0.186325 |
| Q5MIZ7 | Serine/thre PPP4R3B K   | -3.25096 | -3.53138 | -3.62449 | -3.32193 | -1.69302 | -3.65208 | -3.18536 | -3.16993 | -2.97199 | -2.34873 |
| Q5QJ74 | Tubulin-spæ TBCEL LRRc  | 1.680721 | 1.659678 | 1.655971 | 1.241973 | 1.484896 | 1.529253 | 1.67102  | 1.51056  | 1.646494 | 1.458627 |
| Q5QJE6 | Deoxynuclæ DNTTIP2 Ef   | -0.88359 | -0.65486 | -0.88753 | -0.71621 | -0.35199 | -0.44448 | -0.42694 | -0.1671  | -0.53629 | -0.61402 |
| Q5QNW6 | Histone H2 H2BC18 HI    | 0.410579 | 1.086079 | 2.460469 | 2.122771 | 1.924746 | 1.596422 | 2.356149 | 2.434677 | 1.608127 | 1.534533 |



|        |                        |          |          |          |          |          |          |          |          |          |          |
|--------|------------------------|----------|----------|----------|----------|----------|----------|----------|----------|----------|----------|
| Q5R372 | Rab GTPase RABGAP1L    | -0.98793 | -1.12069 | -0.67963 | -0.8011  | -1.10842 | -0.86449 | -0.86828 | -0.65535 | -1.25051 | -1.64549 |
| Q5RKV6 | Exosome co EXOSC6 MI   | -0.9732  | -0.71916 | -0.16403 | -0.27225 | -0.05353 | -0.1026  | -0.39519 | -0.09271 | 0.188534 | 0.287003 |
| Q5SRE5 | Nucleoporin NUP188 KI  | -1       | -0.90004 | -0.5541  | -0.70594 | -1.04532 | -0.71348 | -1.21046 | -0.94386 | -0.89107 | -0.89752 |
| Q5SRN2 | Testis-expr TSBP1 C6o  | 1.324351 | 1.533361 | 1.3725   | 1.446832 | 1.597304 | 1.321928 | 2.047801 | 1.446886 | 1.760812 | 1.884892 |
| Q5SSJ5 | Heterochro HP1BP3      | 0.836501 | 0.742414 | 0.733584 | 0.772895 | 1.445464 | 0.930243 | 1.154389 | 0.933691 | 0.894836 | 0.852932 |
| Q5SW79 | Centrosom CEP170 FAI   | -1.26922 | -0.9391  | -0.98904 | -0.65094 | -1.15974 | -0.87447 | -1.42094 | -1.88577 | -1.00554 | -1.26236 |
| Q5SY16 | Polynucleo NOL9        | 0.155031 | 0.253253 | 0.323487 | 0.462849 | 0.666874 | 0.666412 | 0.467779 | 0.321928 | 0.702614 | 1.073337 |
| Q5T011 | KICSTOR cc SZT2 C1orf  | -4.08746 | -4.00782 | -1.7632  | -2.71621 | -3.3702  | -3.36123 | -3.049   | -3.11028 | -3.14031 | -2.91198 |
| Q5T013 | Putative hy HYI HT036  | 1.949103 | 2.081487 | 1.189718 | 1.421296 | 1.757639 | 1.577658 | 1.560888 | 1.528532 | 1.599038 | 1.429349 |
| Q5T0F9 | Coiled-coil CC2D1B KI  | -1.127   | -1.1866  | -1.08558 | -1.02165 | 0.981288 | 1.404755 | 1.117836 | 1.152003 | -1.1818  | -0.48181 |
| Q5T1C6 | Acyl-coenz' THEM4 CT   | -0.17471 | -0.04543 | -0.40302 | -0.39313 | 0.143756 | 0.181292 | -0.59516 | -0.69295 | -0.04733 | 0.08851  |
| Q5T1M5 | FK506-bind FKBP15 KIA  | -0.34775 | -0.20805 | -0.01183 | -0.35364 | -0.16528 | -0.28465 | 0.061055 | -0.05111 | -0.13069 | -0.13927 |
| Q5T200 | Zinc finger ZC3H13 KIA | -2.14639 | -1.75673 | -1.36146 | -1.47045 | -2.47063 | -2.34502 | -2.80866 | -1.97728 | -1.9906  | -1.54137 |
| Q5T2T1 | MAGUK p5 MPP7          | -0.53566 | -0.46698 | -0.41897 | -0.38534 | -0.01691 | -0.2996  | -0.28829 | -0.17971 | 0.08216  | 0.117177 |
| Q5T3I0 | G patch do GPATCH4 C   | -1.51978 | -1.84488 | -2.05565 | -3.03814 | -2.84503 | -2.91511 | -1.71329 | -3.07039 | -1.86507 | -1.8893  |
| Q5T440 | Putative tr IBA57 C1or | 0.160465 | 0.034673 | -1.21773 | -0.90699 | -1.91077 | -0.99185 | -0.80246 | -0.84539 | -1.03592 | -0.93162 |
| Q5T4S7 | E3 ubiquitin UBR4 KIAA | -0.68536 | -0.45457 | -0.26929 | -0.41086 | -0.58869 | -0.79647 | -0.41886 | -0.76783 | -0.62803 | -0.59384 |
| Q5T5Y3 | Calmodulin CAMSAP1     | -1.91572 | -1.0873  | -0.71801 | -0.912   | -1.29972 | -0.82545 | -0.96921 | -0.86694 | -0.67541 | -0.90559 |
| Q5T601 | Adhesion C ADGRF1 GF   | -0.68536 | -0.6734  | -0.20046 | -0.51457 | -0.76702 | -0.45943 | -0.37137 | -0.33342 | -0.30902 | 1.118877 |
| Q5T653 | 39S ribosom MRPL2 CGI  | -1.0025  | -0.90812 | -1.10864 | -1.07204 | -1.16531 | -1.00515 | -0.96775 | -1.18497 | -1.06824 | -0.98137 |
| Q5T6J7 | Probable gl IDNK C9orf | 0.906082 | 1.038474 | 0.375509 | 0.471923 | 0.079567 | -0.1375  | 0.352302 | 0.162271 | -0.23502 | -0.08663 |
| Q5T6V5 | Queuosine C9orf64      | -1.52861 | -0.97024 | -1.72952 | -2.37773 | -1.61465 | -1.96559 | -1.19333 | -1.16428 | -1.22504 | -1.05912 |
| Q5T8P6 | RNA-bindin RBM26 C13   | -0.03641 | 0.01995  | 0.075    | 0.246017 | 0.127831 | 0.235563 | -0.11676 | 0.22874  | 0.228429 | 0.527482 |
| Q5T9A4 | ATPase far ATAD3B KI   | 1.106091 | 1.218195 | 1.235103 | 1.218372 | 1.295866 | 1.20401  | 1.136802 | 1.069697 | 1.249631 | 1.10958  |
| Q5T9C2 | Protein FAI FAM102A C  | -2.89482 | -1.5541  | -2.54975 | -2.53998 | -2.04174 | -2.14072 | -3.25712 | -2.73891 | -2.26857 | -1.93031 |
| Q5TAX3 | Terminal ur TUT4 KIAA  | -2.60942 | -1.34156 | -0.63051 | -1.2909  | -0.81855 | -0.91511 | -1.46713 | -1.37737 | -1.15936 | -0.94785 |
| Q5TBB1 | Ribonuclea RNASEH2B    | 1.194797 | 1.197874 | 1.515366 | 1.368001 | 1.191621 | 1.046871 | 1.233693 | 1.163631 | 1.109735 | 1.108762 |
| Q5TDH0 | Protein DD DDI2        | -0.11944 | 0.13593  | 0.32842  | 0.458291 | 0.226454 | 0.285938 | -0.00322 | 0.402508 | 0.53743  | 0.53361  |
| Q5TEJ8 | Protein THI THEMIS2 C  | -1.85334 | -1.72129 | -1.80716 | -2.03032 | -1.40375 | -1.76969 | -1.58504 | -1.625   | -1.62583 | -1.46298 |
| Q5TFE4 | 5'-nucleoti NT5DC1 NT  | 1.855603 | 1.75898  | 1.248262 | 1.631881 | 1.633125 | 1.619137 | 1.564113 | 1.629616 | 1.328727 | 1.322314 |
| Q5THJ4 | Vacuolar pi VPS13D KIA | -2.85042 | -2.48699 | -1.97679 | -1.65567 | -3.07635 | -2.1375  | -2.16227 | -1.60224 | -2.1913  | -2.26127 |
| Q5TYW1 | Zinc finger ZNF658     | 1.610994 | 1.687787 | 1.458723 | 1.47869  | 1.726517 | 1.797956 | 1.623661 | 1.557995 | 1.721323 | 1.463449 |
| Q5TZA2 | Rootletin (C CROCC KIA | -0.42742 | -0.31706 | -0.59822 | -0.49849 | -0.64929 | -0.41504 | -0.38355 | -0.3919  | -0.36561 | -0.10708 |

|        |              |            |          |          |          |          |          |          |          |          |          |          |
|--------|--------------|------------|----------|----------|----------|----------|----------|----------|----------|----------|----------|----------|
| Q5VIR6 | Vacuolar pi  | VPS53 PP1  | -1.70499 | -1.12199 | -2.10356 | -1.7248  | 0.28273  | 0.570316 | -1.90613 | -1.67709 | -0.03339 | 0.276981 |
| Q5VSL9 | Striatin-int | STRIP1 FAM | -0.74394 | -0.42294 | -0.41685 | -0.25853 | -0.23987 | -0.43394 | -0.84192 | -0.42269 | -0.61651 | -0.72745 |
| Q5VT06 | Centrosom    | CEP350 CA  | -1.21714 | -0.56398 | -0.67105 | -0.62713 | -1.42624 | -0.59335 | -0.59268 | -0.78915 | -0.82559 | -0.5929  |
| Q5VT52 | Regulation   | RPRD2 KIA  | -0.341   | -0.06786 | 0.111816 | 0.042491 | -0.01495 | -0.02203 | -0.04316 | -0.10076 | 0.06454  | 0.059257 |
| Q5VTL8 | Pre-mRNA-    | PRPF38B    | -0.15335 | -0.19153 | -1.75241 | -0.97644 | -1.69222 | -1.55575 | 0.113114 | 0.005714 | -1.47472 | -1.79914 |
| Q5VTR2 | E3 ubiquiti  | RNF20 BRE  | -0.90119 | -0.75487 | -0.51055 | -0.60358 | -0.46036 | -0.71348 | -0.92198 | -0.52892 | -0.64693 | -0.50324 |
| Q5VTU8 | ATP syntha   | ATP5F1EP2  | 0.760972 | 0.726715 | 0.666024 | 0.777212 | 0.53601  | 0.849226 | 1.231755 | 1.144674 | 0.543505 | 0.425472 |
| Q5VU43 | Myomegali    | PDE4DIP CI | -2.80735 | -2.13906 | -1.73697 | -1.61667 | -2.74193 | -2.06711 | -2.9301  | -2.30485 | -1.76553 | -1.64829 |
| Q5VV17 | OTU domai    | OTUD1 DU   | -1.53727 | -0.96914 | -0.20495 | -0.20163 | -0.42999 | -0.32329 | -0.39136 | -0.1193  | -0.3445  | -0.04495 |
| Q5VV52 | Zinc finger  | ZNF691     | -2.72489 | -2.34156 | -3.48699 | -3.0906  | -1.31451 | -2.95693 | -3.18536 | -3.51785 | -3.25739 | -3.1008  |
| Q5VW32 | BRO1 domi    | BROX BROF  | -2.85042 | -1.60064 | -0.57719 | -0.65567 | -0.23359 | -1.11366 | -0.70492 | -0.56789 | -1.62803 | -0.7121  |
| Q5VWQ0 | Lysine-spec  | RSBN1      | -1.24293 | -1.06856 | -0.71881 | -1.00005 | -1.05651 | -0.8471  | -0.76525 | -1.27791 | -1.13778 | -0.68163 |
| Q5VYK3 | Proteasom    | ECPAS ECM  | -1.64689 | -1.96153 | -2.07195 | -1.98751 | -3.79256 | -3.79647 | -2.05209 | -2.80735 | -1.81444 | -2.32636 |
| Q5VZ89 | DENN dom     | DENND4C (  | -2.17646 | -1.37565 | -0.32193 | -0.21613 | -0.54463 | -0.52869 | -2.11429 | -1.7948  | -0.35652 | -0.25597 |
| Q5VZL5 | Zinc finger  | ZMYM4 KIA  | 0.850016 | 0.756331 | 0.351262 | 0.693669 | 0.638492 | 0.669851 | 0.661349 | 0.659345 | 0.753839 | 0.831181 |
| Q5W0V3 | Protein FAI  | FAM160B1   | 0.03592  | 0.01165  | -0.13906 | -0.03171 | -0.63413 | -0.45943 | -0.32577 | -0.42269 | -0.88235 | -0.81735 |
| Q5W111 | SPRY doma    | SPRYD7 C1  | 0.572788 | 0.740082 | 0.507538 | 0.542527 | 0.739937 | 0.624491 | 0.693339 | 0.842899 | 0.520689 | -0.01334 |
| Q63HN8 | E3 ubiquiti  | RNF213 AL  | -0.4718  | -0.32352 | -0.37679 | -0.36996 | -0.53382 | -0.23704 | -0.20881 | -0.41183 | -0.50959 | -0.3431  |
| Q641Q2 | WASH com     | WASHC2A    | -3.72489 | -2.53138 | -1.73697 | -2.67557 | -2.53078 | -1.67366 | -1.25824 | -1.77957 | -2.55855 | -2.54229 |
| Q658Y4 | Protein FAI  | FAM91A1    | -2.68536 | -1.02359 | -0.16069 | 0.646363 | 0.014797 | 0.174774 | -0.00513 | 0.039528 | -0.52268 | -0.32082 |
| Q66K14 | TBC1 dom     | TBC1D9B K  | -1.07464 | -1.03953 | -1.09675 | -1.82312 | -1.37109 | -0.91511 | -1.17377 | -1.50155 | -1.10764 | -1.40621 |
| Q66K74 | Microtubul   | MAP1S BP\  | -0.76922 | -0.62866 | -0.07023 | -0.2125  | -0.3246  | -0.16481 | -0.69105 | -1.07501 | -0.35489 | -0.21272 |
| Q66K89 | Transcripti  | E4F1 E4F   | -0.30986 | -0.18265 | -0.31221 | -0.38606 | -0.29613 | -0.2962  | -0.31937 | -0.39985 | -0.49584 | -0.16882 |
| Q66LE6 | Serine/thre  | PPP2R2D K  | -0.31739 | -0.01963 | 0.019365 | 0        | -0.7051  | -0.14958 | -0.23868 | -0.31194 | -0.02857 | -0.03132 |
| Q66PJ3 | ADP-ribosy   | ARL6IP4    | 0.523035 | 0.369485 | 0.485427 | 0.236659 | 0.498119 | 0.381871 | 0.239827 | 0.34915  | 0.762203 | 0.811143 |
| Q676U5 | Autophagy    | ATG16L1 A  | -0.67451 | -0.75062 | -0.2095  | -0.30717 | -0.38714 | -0.27846 | -0.36731 | -0.33755 | -0.39705 | -0.49537 |
| Q684P5 | Rap1 GTPa    | RAP1GAP2   | -3.58014 | -3.94642 | -2.15634 | -2.67557 | -1.69302 | -1.7809  | -3.20437 | -3.74756 | -3.5025  | -3.1788  |
| Q68CP9 | AT-rich int  | ARID2 BAF  | 0.819428 | 0.790547 | 0.668291 | 0.209792 | 1.007417 | 0.801096 | 0.690171 | 0.871343 | 0.985786 | 0.75718  |
| Q68CQ4 | Digestive o  | DIEXF C1or | -1.45187 | -1.05565 | -1.63656 | -1.24558 | -1.39046 | -0.76827 | -1.23266 | -1.26303 | -0.75754 | -1.03585 |
| Q68CZ6 | HAUS augn    | HAUS3 C4c  | -1.02445 | -0.92405 | -0.15634 | -0.32979 | -0.1487  | -0.37906 | -0.37137 | -0.31907 | 0.018737 | -0.24544 |
| Q68D20 | Protein PM   | PMS2CL PN  | -1.74507 | -1.44392 | -1.77649 | -1.89129 | -2.51245 | -1.47454 | -2.96963 | -2.04654 | -1.46297 | -2.41799 |
| Q68DK7 | Male-speci   | MSL1 MSL1  | -1.1669  | -1.12199 | -1.11353 | -1.32193 | -1.10806 | -0.87447 | -0.4957  | -1.03477 | -1.03822 | -0.7121  |
| Q68E01 | Integrator   | INTS3 C1or | -1.32746 | -1.64238 | -1.49269 | -1.31819 | -0.83996 | -1.83491 | -0.85285 | -1.17732 | -1.19633 | -0.64533 |

|        |                              |          |          |          |          |          |          |          |          |          |          |
|--------|------------------------------|----------|----------|----------|----------|----------|----------|----------|----------|----------|----------|
| Q68EM7 | Rho GTPase ARHGAP17          | -0.53727 | -0.17823 | -0.45874 | -0.40055 | -0.44667 | -0.52177 | -0.67319 | -0.58241 | -0.42845 | -0.45854 |
| Q69YN2 | CWF19-like CWF19L1           | 0.80427  | 0.790249 | 0.72733  | 0.556954 | 0.905242 | 0.621541 | 0.851344 | 0.475343 | 0.736422 | 0.753605 |
| Q69YN4 | Protein viri VIRMA KIAA      | -3.13993 | -1.68589 | -1.88753 | -1.71621 | -2.64572 | -3.04439 | -3.18536 | -3.07039 | -2.28011 | -1.50324 |
| Q6DD87 | Zinc finger ZNF787           | -1.941   | -2.56233 | -2.73373 | -2.39346 | -2.50019 | -2.39842 | -0.01543 | -0.53434 | -2.79471 | -2.54971 |
| Q6DD88 | Atlantin-3 ( ATL3            | 0.029995 | 0.007777 | 0.042266 | -0.3377  | -0.23359 | -0.2962  | -0.02581 | 0.167378 | -0.78978 | -0.69052 |
| Q6F5E8 | Capping protein CARMIL2 LI   | -1.68077 | -1.53106 | -1.30758 | -1.46181 | -1.5978  | -2.27819 | -1.63232 | -1.3323  | -1.51587 | -1.07619 |
| Q6FI81 | Anamorsin CIAPIN1 CL         | -0.7027  | -0.57719 | -0.48699 | -0.38841 | -0.75759 | -0.66235 | -0.55498 | -0.71989 | -0.52384 | -0.32423 |
| Q6GMV2 | SET and MYO SMYD5 RAI        | -0.27277 | -0.09675 | 0.348202 | -0.03171 | -0.03753 | -0.11677 | 0.022811 | 0.064667 | 0.20861  | 0.208834 |
| Q6GMV3 | Putative protein PTRHD1 C2   | -0.90613 | -0.74348 | -0.6672  | -0.66558 | -0.7051  | -0.76827 | -0.39808 | -0.81741 | -0.68753 | -0.63448 |
| Q6GPH4 | XIAP-associated XAF1 BIRC4   | -0.65641 | -0.15634 | -2.71284 | -1.52672 | -0.26006 | -0.37197 | -1.93063 | -2.22017 | -0.02377 | -0.01334 |
| Q6GYQ0 | Ral GTPase RALGAPA1          | -3.89482 | -3.44392 | -2.53138 | -3.45317 | -2.84503 | -1.93587 | -1.94973 | -3.72935 | -3.39941 | -3.1788  |
| Q6I9Y2 | THO complex THOC7 NIF        | 1.109451 | 1.220533 | 1.374186 | 1.31281  | 1.228872 | 1.27255  | 1.256742 | 1.304043 | 1.534649 | 1.242125 |
| Q6IA17 | Single Ig IL- SIGIRR UNC     | -0.35797 | -0.262   | -0.43643 | -0.94465 | -0.7211  | -0.62908 | -0.66547 | -1.0086  | -0.83794 | -0.87301 |
| Q6IAA8 | Regulator of LAMTOR1 (       | -1.90618 | -1.92742 | -1.97647 | -3.52537 | -2.26724 | -1.57204 | -1.64237 | -1.56879 | -1.8505  | -2.00987 |
| Q6IBS0 | Twinfilin-2 TWF2 PTK9        | 0.157886 | 0.116077 | -0.38303 | -0.29408 | -0.33313 | -0.36966 | -0.37365 | -0.45372 | -0.4154  | -0.28803 |
| Q6ICL3 | Transporter TANGO2 C2        | 0.329184 | 0.295167 | 0.027039 | 0.666263 | 0.086588 | 0.373458 | 0.131912 | 0.177538 | 0.349942 | -0.20918 |
| Q6IN85 | Serine/threonine PPP4R3A K   | 0.815989 | 1.009715 | 0.923616 | 0.646363 | 0.869326 | 0.977974 | 0.752232 | 0.75743  | 0.88977  | 0.67609  |
| Q6IQ49 | Replication SDE2 C1orf       | 0.760299 | 0.82918  | 1.158308 | 0.745346 | 0.721921 | 0.811348 | 1.050231 | 1.035351 | 1.224479 | 1.191235 |
| Q6JBY9 | CapZ-interacting RCSN1 CAP   | -0.1975  | -0.13431 | -0.80832 | -0.97328 | -0.54459 | -0.8596  | -0.64888 | -0.65402 | -0.66263 | -0.48679 |
| Q6K0P9 | Pyren and P PYHIN1 IFI       | -1.292   | -1.08825 | -1.88753 | -1.8011  | -0.49139 | -0.86449 | -3.09516 | -2.02308 | -1.97293 | -1.10835 |
| Q6KC79 | Nipped-B-like NIPBL IDN3     | -0.77307 | -0.66834 | -0.79667 | -0.9629  | -0.87728 | -0.92102 | -0.37606 | -0.56789 | -0.9445  | -0.39453 |
| Q6L8Q7 | 2',5'-phosphatase PDE12      | -1.60321 | -1.20146 | -1.18711 | -1.69804 | -1.38809 | -1.34597 | -1.07142 | -1.31935 | -1.07628 | -1.2734  |
| Q6MZP7 | Protein lin- LIN54 CXCL      | -3.5025  | -3.77649 | -2.30256 | -4.14505 | -3.89947 | -4.34395 | -4.3322  | -1.80735 | -4.08746 | -3.13927 |
| Q6N069 | N-alpha-acetyl NAA16 NAF     | -1.74507 | -1.90202 | -1.46529 | -1.15899 | -1.04532 | -1.24998 | -1.5697  | -1.97728 | -1.73383 | -0.89752 |
| Q6NTE8 | MRN complex MRNIP C5c        | -2.53727 | -2.17383 | -1.77649 | -3.45317 | -3.42999 | -3.28951 | -2.16227 | -2.93289 | -1.78165 | -1.77887 |
| Q6NUK1 | Calcium-binding SLC25A24 /   | 0.121991 | -0.03953 | -0.35147 | -0.30633 | -1.12418 | -0.11366 | -0.27537 | -0.5764  | -1.04793 | -1.22979 |
| Q6NUM9 | All-trans-retene RETSAT PP   | -0.80735 | -0.35646 | -0.61849 | -0.82312 | -1.35199 | -0.93587 | -0.18536 | -0.52607 | -1.83112 | -1.38294 |
| Q6NUQ4 | Transmembrane TMEM214        | -0.11346 | -0.35147 | -0.66102 | -0.97513 | -0.269   | -0.90484 | -0.5175  | -0.37737 | -1.24616 | -0.98241 |
| Q6NVY1 | 3-hydroxyisovaleryl HIBCH    | 1.26     | 1.554276 | 0.850161 | 1.296617 | 0.96233  | 1.084889 | 0.971584 | 1.036741 | 1.236468 | 1.29693  |
| Q6NXR4 | TELO2-interacting TTI2 C8orf | -0.91238 | -0.41665 | -1.13204 | -0.31675 | -0.94581 | -0.94825 | 1.336182 | 1.429988 | -0.22722 | -0.48926 |
| Q6NYC8 | Phostensin PPP1R18 H         | -0.16011 | -0.23217 | 0.46028  | 0.481592 | 0.255211 | 0.082663 | 0.030128 | 0.074998 | -0.2687  | 0.284043 |
| Q6NZY4 | Zinc finger ZCCHC8           | -0.5639  | -0.36604 | -0.2276  | -0.61667 | -0.5231  | -0.54455 | -0.4885  | -0.56789 | -0.87485 | -0.63831 |
| Q6P158 | Putative AT DHX57            | -0.73329 | -0.8142  | -0.74987 | -0.59008 | -0.43684 | -0.78704 | -0.8721  | -0.79607 | -0.80277 | -1.06493 |

|        |                        |          |          |          |          |          |          |          |          |          |          |
|--------|------------------------|----------|----------|----------|----------|----------|----------|----------|----------|----------|----------|
| Q6P179 | Endoplasm ERAP2 LRA    | -0.10093 | -0.16869 | -0.32127 | -0.14645 | 0.10304  | 0.197506 | -0.58904 | -0.25135 | -0.34344 | -0.58127 |
| Q6P1J9 | Parafibrom CDC73 C1o   | -2.85042 | -2.08844 | -1.20046 | -0.45317 | -1.26006 | -1       | -1.42531 | -1.51785 | -1.2916  | -1.34873 |
| Q6P1K2 | Polyamine- PMF1        | -0.76553 | -0.72403 | -0.66102 | -0.5881  | -0.85845 | -0.77761 | -0.9898  | -0.71989 | -1.03822 | -0.49698 |
| Q6P1L5 | Protein FAI FAM117B /  | -3.89482 | -3.94642 | NA       | NA       | -3.59991 | -3       | -4.23266 | -4.07039 | -2.1281  | -3.21945 |
| Q6P1L8 | 39S ribosor MRPL14 M   | -1.09515 | -0.52892 | -0.10509 | 0.138416 | -0.40887 | -0.65269 | -0.57539 | -0.99133 | -0.43828 | -0.28717 |
| Q6P1N0 | Coiled-coil CC2D1A AK  | -0.01217 | 0.003894 | 0.003894 | 0.288936 | -0.10806 | -0.05571 | 0.209177 | 0.136462 | -0.4892  | 0.052151 |
| Q6P1N9 | Putative de TATDN1 CC  | 1.083481 | 0.957845 | 0.705531 | 0.634833 | 0.821465 | 0.714817 | 0.799534 | 0.661264 | 1.304752 | 1.031616 |
| Q6P1R4 | tRNA-dihyc DUS1L       | 0.014548 | 0.072049 | 0.5712   | 0.392717 | 0.361426 | 0.412407 | 0.30137  | 0.489704 | 0.511494 | 0.387728 |
| Q6P2E9 | Enhancer o EDC4 HEDL   | -0.62005 | -0.06644 | -0.16506 | -0.46179 | -0.29613 | -0.0902  | -0.45305 | -0.1635  | -0.18593 | -0.1788  |
| Q6P2H3 | Centrosom CEP85 CCD    | -1.45187 | -1.4021  | -1.5427  | -1.02531 | -1.01495 | -1.26303 | -0.9898  | -1.23581 | -1.02857 | -1.27191 |
| Q6P2Q9 | Pre-mRNA- PRPF8 PRP    | 0.348356 | 0.329705 | -0.152   | -0.0973  | -0.13231 | 0.090032 | 0.005107 | -0.2978  | 0.09134  | 0.186547 |
| Q6P3X3 | Tetratricop TTC27      | -1.02445 | -1       | -1.2185  | -1.67557 | -1       | -0.90484 | -1.81762 | -1.40742 | -1.31487 | -1.27191 |
| Q6P4R8 | Nuclear fac NFRKB INO  | -0.92219 | -0.39232 | 0.018313 | -0.22715 | -0.18704 | -0.28544 | 0.040641 | -0.1018  | 0.241119 | -0.04391 |
| Q6P587 | Acylpyruva FAHD1 C16   | -0.26874 | 0.270319 | 0.07045  | 0.26311  | 0.369211 | 0.546192 | 0.615862 | 0.647332 | 0.371044 | 0.017832 |
| Q6P589 | Tumor neci TNFAIP8L2   | -0.94062 | -0.63051 | -0.44923 | -0.36976 | -0.66918 | -0.48215 | -0.42531 | -0.74846 | -0.89984 | -1.26127 |
| Q6P5X5 | UPF0545 p C22orf39     | -3.08746 | -3.83094 | -2.2276  | -1.67557 | -4.14048 | -1.83494 | -3.28157 | -1.69188 | -2.1913  | -1.76377 |
| Q6P6C2 | RNA demet ALKBH5 AB    | -0.36817 | -0.39003 | 0.035149 | 0.039041 | 0.255874 | 0.221503 | 0.101072 | 0.214631 | 0.062713 | 0.16894  |
| Q6P996 | Pyridoxal-d PDXDC1 KI  | -0.9523  | -1.15634 | -0.76983 | -0.52356 | -0.72955 | -1.27621 | -0.7217  | -0.87925 | -1.14886 | -0.64137 |
| Q6PCB8 | Embigin EMB            | 0.4932   | 0.52661  | 0.854481 | 1.13179  | 0.365871 | 0.227069 | 0.475158 | 0.644772 | 0.778786 | 0.619939 |
| Q6PCE3 | Glucose 1,6 PGM2L1 BI  | -1.68536 | -1.79681 | -1.6269  | -1.8928  | -1.48942 | -1.39823 | -1.43818 | -2.01376 | -1.48442 | -1.23477 |
| Q6PD62 | RNA polym CTR9 KIAAC   | -3.03684 | -1.64874 | -2.60064 | -2.98751 | 0.054239 | -1.36014 | -1.02035 | -1.27365 | -1.74959 | -1.77887 |
| Q6PD74 | Alpha- and AAGAB       | -1.4345  | -1.16539 | -1.26267 | -1.35497 | -0.56209 | -0.58534 | -0.94018 | -0.78293 | -1.62909 | -1.4358  |
| Q6PGP7 | Tetratricop TTC37 KIAA | -1.92834 | -2.30064 | -1.76764 | -1.21879 | -1.14048 | -0.89465 | -1.18536 | -1.45372 | -2.03903 | -1.75862 |
| Q6PI48 | Aspartate-- DARS2      | 1.370797 | 1.567275 | 1.503356 | 1.424383 | 1.29326  | 1.6093   | 1.457113 | 1.281182 | 1.3186   | 1.097312 |
| Q6PII3 | Coiled-coil CCDC174 C  | -1.30986 | -1.68589 | -1.08844 | -1.3377  | -0.97056 | -1.38618 | -1.38466 | -1.14439 | -1.07748 | -0.93934 |
| Q6PIZ9 | T-cell receę TRAT1 TCR | -0.23328 | -0.29734 | -0.50094 | -0.76744 | -0.28562 | -0.49504 | -0.49799 | -0.36748 | -0.31358 | -0.29957 |
| Q6PJ69 | Tripartite n TRIM65    | 0.296893 | 0.008997 | 0.340892 | 0.405395 | 0.462484 | 0.728292 | 0.416065 | 0.490201 | 0.104192 | 0.106211 |
| Q6PJG2 | Mitotic deę MIDEAS C1  | -1.45187 | -1.07195 | -0.97679 | -1.03814 | -0.8055  | -0.88452 | -0.78836 | -0.79309 | -0.87368 | -1.2507  |
| Q6PJI9 | GATOR con WDR59 KIA    | 0.45635  | 0.486276 | 0.130128 | 0.10039  | 0.572079 | 0.632644 | 0.597599 | 0.266357 | 0.359188 | 0.311148 |
| Q6PJT7 | Zinc finger ZC3H14     | -0.67147 | -0.39527 | -0.69691 | -0.64635 | -0.72976 | -0.84985 | -0.8637  | -0.75367 | -0.82869 | -0.71939 |
| Q6PJW8 | Consortin CNST C1orf   | -2.55148 | -2.079   | -2.31391 | -3.00233 | -0.84391 | -0.98112 | -1.00733 | -1.84067 | -1.38502 | -2.4375  |
| Q6PK04 | Coiled-coil CCDC137 c  | 1.719892 | 1.934185 | 2.182864 | 1.917722 | 1.895942 | 1.671568 | 1.761315 | 1.886906 | 1.816754 | 1.54609  |
| Q6PKC3 | Thioredoxi TXNDC11 E   | 0.03592  | -0.36146 | -0.29776 | -0.23816 | -0.44004 | -0.14958 | -0.44606 | 0.039528 | -0.09752 | -0.08194 |

|         |                         |          |          |          |          |          |          |          |          |          |          |
|---------|-------------------------|----------|----------|----------|----------|----------|----------|----------|----------|----------|----------|
| Q6PKG0  | La-related   LARP1 KIAA | -0.73646 | -1.21483 | -1.27402 | -0.89129 | -1.07635 | -1.17958 | -0.31937 | -0.46949 | -0.87729 | -0.54137 |
| Q6PL18  | ATPase fam ATAD2 L16    | -1.76553 | -1.90202 | -2.24598 | -2.03814 | -3.2076  | -3.34395 | -2.01027 | -3.22239 | -2.23502 | -2.11991 |
| Q6QNY0  | Biogenesis BLOC1S3 B    | -1.08196 | -1.04407 | -1.6103  | -1.77426 | -1.01518 | -1.29758 | -1.39025 | -1.30733 | -1.10659 | -1.05316 |
| Q6QNY1  | Biogenesis BLOC1S2 B    | -2.02916 | -1.61355 | -0.5656  | -0.27563 | -2.4855  | -1.69028 | -1.86707 | -2.48864 | -0.97062 | -1.60011 |
| Q6RFH5  | WD repeat WDR74 NS      | -0.68536 | -0.69849 | -0.1305  | -0.30633 | 0.093574 | -0.1315  | -0.24473 | -0.6735  | 0.222392 | 0.143125 |
| Q6RW13  | Type-1 ang AGTRAP AT    | -1.91373 | -1.71984 | -0.25526 | -0.39428 | -1.77798 | -2.32008 | -0.35165 | -0.36257 | -0.11784 | -0.03585 |
| Q6SPF0  | Atherin (St) SAMD1      | 0.03592  | 0.079643 | 0.378512 | 0.031027 | -0.10806 | 0.347923 | 0.159657 | 0.094182 | 0.273994 | 0.66808  |
| Q6SZW1  | NAD(+) hyc SARM1 KIA    | -1.27331 | -0.71109 | -1.03602 | -0.5741  | -1.05734 | -0.82037 | -0.75696 | -0.50988 | -0.85442 | -0.53496 |
| Q6UB98  | Ankyrin re ANKRD12 A    | -0.24377 | 0.034673 | 0.26628  | 0.15451  | 0.168271 | 0.352211 | -0.11718 | 0.344648 | 0.382857 | 0.392739 |
| Q6ULP2  | Aftiphilin AFTPH AFT    | -1.84498 | -1.53068 | -1.72516 | -2.49397 | -2.55612 | -2.66843 | -2.72786 | -2.35396 | -1.7412  | -1.78617 |
| Q6UN15  | Pre-mRNA FIP1L1 FIP1    | 0.224123 | 0.253253 | -0.37656 | -0.2986  | -0.88567 | -0.45943 | -0.378   | -0.64636 | -0.37474 | -0.36004 |
| Q6UUV7  | CREB-regul CRTC3 TOR    | -2.94062 | -2.53138 | -1.97679 | -3.38606 | NA       | NA       | -2.03103 | -1.848   | -2.16993 | -2.30433 |
| Q6UUV9  | CREB-regul CRTC1 KIAA   | 0.05143  | 0.049962 | 0.187673 | -0.04334 | 0.544601 | 0.488987 | 0.194773 | 0.414014 | 0.779348 | 0.546204 |
| Q6UWE0  | E3 ubiquitin LRSAM1 TA  | -1.60942 | -1.23676 | -0.44923 | -0.73697 | -1.22487 | -1.01097 | -0.84493 | -0.68266 | -0.78978 | -0.86491 |
| Q6UX04  | Spliceosom CWC27 SD     | -1.9019  | -1.12952 | -1.78458 | -2.14612 | -1.96652 | -1.85416 | -2.30866 | -1.70383 | -1.81999 | -1.23839 |
| Q6UXB8  | Peptidase i PI16 CRISP  | -1.37126 | -1.2185  | -0.93147 | -0.92663 | -1.89947 | -1.85457 | -1.26919 | -1.37737 | -1.68753 | -2.2402  |
| Q6UXH1  | Protein dis CRELD2 UN   | 0.154587 | 0.694965 | 1.000481 | 1.146873 | 0.927137 | 0.78837  | 0.959179 | 0.177866 | 0.828395 | 0.493529 |
| Q6UXN9  | WD repeat WDR82 TM      | 0.960935 | 0.827232 | 0.229212 | 0.457799 | 0.557166 | 0.775877 | 0.673046 | 0.676267 | 0.495514 | 0.423256 |
| Q6UXV4  | MICOS conr APOOL CXc    | 0.889817 | 0.770115 | 1.370994 | 1.064403 | 0.973734 | 1.33931  | 1.204745 | 1.180067 | 1.014075 | 1.002211 |
| Q6VEQ5  | WAS protei WASH2P FA    | -0.34006 | -0.35021 | 0.082622 | -0.07826 | -1.34843 | -0.57154 | 0.67869  | 0.602158 | 0.185746 | 0.067667 |
| Q6VMQ6  | Activating t ATF7IP MC  | -1.1004  | -1.26459 | -1.20046 | -0.73697 | -0.81855 | -1.05571 | -0.96963 | -0.53434 | -1.25739 | -2.0268  |
| Q6VN20  | Ran-bindin RANBP10 K    | -3.08746 | -2.08844 | -1.13906 | -3.14505 | -1.74193 | -1.30293 | -2.16227 | -1.82753 | -1.39941 | -1.6763  |
| Q6VY07  | Phosphofu PACS1 KIAA    | -1.1004  | -0.96153 | -0.91506 | -1.19962 | -1.01495 | -0.95693 | -1.04507 | -1.01182 | -0.95854 | -1.03217 |
| Q6WCCQ1 | Myosin phc MPRIP KIAA   | -1.04281 | -1.37193 | -0.64211 | -0.64228 | 0.020613 | -0.10825 | -0.34207 | -0.15288 | -0.1546  | -0.01752 |
| Q6WKZ4  | Rab11 fami RAB11FIP1    | -1.91754 | -2.00782 | -1.61252 | -1.24558 | -2.95606 | -1.52083 | -1.53673 | -1.93554 | -1.65748 | -1.97369 |
| Q6XQN6  | Nicotinate NAPRT FHII   | -0.91211 | -0.64269 | -0.08638 | 0.00854  | -0.46753 | -0.3747  | -0.03673 | -0.32222 | -1.05985 | -1.07668 |
| Q6Y2X3  | DnaJ homo DNAJC14 D     | -0.82873 | -0.62449 | -0.37656 | -1.23078 | -1.39046 | -1.28951 | -0.83577 | -0.95491 | -1.46297 | -0.75627 |
| Q6Y7W6  | GRB10-inte GIGYF2 KIA   | -1.60942 | -1.02359 | 0.08672  | -0.42905 | -0.92749 | -0.53349 | -1.04152 | -0.95491 | -0.88235 | -0.9141  |
| Q6YN16  | Hydroxyste HSDL2 C9o    | 0.937566 | 0.682938 | 0.384789 | 0.220107 | 0.330134 | 0.495109 | 0.446706 | 0.619096 | 0.46457  | 0.212635 |
| Q6YP21  | Kynurenine KYAT3 CCB    | -0.02493 | 0.128084 | -0.29596 | -0.08863 | -0.10613 | 0.169851 | 0.097159 | -0.02127 | -1.04216 | -1.08188 |
| Q6ZMI0  | Protein phc PPP1R21 C   | 0.082462 | -0.2185  | -0.27399 | -0.72655 | -0.37109 | -0.26303 | -0.37137 | -0.36257 | -0.23502 | -0.01334 |
| Q6ZMT4  | Lysine-spec KDM7A JHI   | -1.53727 | -1.83094 | -1.66102 | -1.91475 | -1.71727 | -1.34395 | -1.46713 | -1.1571  | -1.57089 | -1.51584 |
| Q6ZMZ3  | Nesprin-3 ( SYNE3 C14   | -1.24593 | -0.89609 | -0.94642 | -0.68407 | -0.57789 | -0.23704 | -0.73867 | -1.04654 | -1.20211 | -1       |

|        |                         |          |          |          |          |          |          |          |          |          |          |
|--------|-------------------------|----------|----------|----------|----------|----------|----------|----------|----------|----------|----------|
| Q6ZNB6 | NF-X1-type NFXL1 OZF    | 0.239609 | 0.638544 | 0.298341 | 0.906054 | 0.31895  | 0.525461 | 0.641808 | 0.465664 | 0.523972 | 0.518551 |
| Q6ZNJ1 | Neurobeac NBEAL2 KIA    | -4.08746 | -1.85896 | -3.48699 | -3.45317 | NA       | NA       | NA       | NA       | -3.93546 | -3.13927 |
| Q6ZS11 | Ras and Ra RINL         | -0.60942 | -0.86605 | 0.837125 | 0.425973 | 0.96233  | 1.008174 | 0.51866  | 0.911463 | 0.714156 | 0.573113 |
| Q6ZSR9 | Uncharacte 0            | -0.81479 | -0.82758 | -0.35096 | -0.47811 | -0.38074 | 0.177029 | -0.04972 | -0.2978  | -0.20349 | -0.09096 |
| Q6ZSS7 | Major facili MFSD6 MM   | -0.5025  | -0.5541  | -0.65486 | -0.75803 | -0.68105 | -0.74977 | -0.61599 | -0.61973 | -0.83954 | -0.93088 |
| Q6ZSZ5 | Rho guanin ARHGEF18     | -0.35585 | -0.12689 | 0.126461 | 0.193992 | 0.472715 | -0.00105 | 0.217222 | 0.156113 | 0.138848 | 0.608441 |
| Q6ZU80 | Centrosom CEP128 C1     | -1.54028 | -1.41487 | -0.62164 | -0.6558  | -1.97122 | -0.92751 | -0.86891 | -0.77096 | -0.89684 | -0.77092 |
| Q6ZUM4 | Rho GTPasi ARHGAP27     | -1.2569  | -0.72146 | -0.31614 | -0.20561 | -0.42    | -0.92773 | -0.66105 | -0.43969 | -0.44428 | -0.29325 |
| Q6ZUT1 | Uncharacte NKAPD1 C1    | 0.029995 | 0.019365 | 0.196539 | 0.15451  | -0.04532 | 0.217701 | -0.0897  | -0.1193  | 0.523972 | 0.662499 |
| Q6ZVF9 | G protein-r GPRIN3 KIA  | -1.62803 | -1.68589 | -1.26235 | -1.26053 | -1.2076  | -1.41504 | -1.52065 | -1.63743 | -1.39801 | -1.23771 |
| Q6ZVK8 | 8-oxo-dGD NUDT18 M      | -1.09227 | -0.75781 | -1.0104  | -1.5247  | -1.38502 | -1.46754 | -0.97356 | -1.81876 | -1.10707 | -1.0537  |
| Q6ZVM7 | TOM1-like TOM1L2        | 0.006049 | 0.064808 | 0.256521 | 0.114512 | 0.232977 | -0.2962  | -0.30035 | 0.061639 | 0.400824 | 0.409495 |
| Q6ZW49 | PAX-intera PAXIP1 PA    | -1.60942 | -2.30256 | -3.36146 | -1.96285 | -3.27798 | -2.06711 | -1.83577 | -2.848   | -2.21299 | -1.36004 |
| Q702N8 | Xin actin-bi XIRP1 CMY  | 1.930141 | 2.050761 | 0.680507 | 0.968291 | 1.232977 | 1.568474 | 1.424598 | 1.061639 | 0.976232 | 0.728087 |
| Q709C8 | Vacuolar pi VPS13C KIA  | -0.42655 | -0.49202 | -0.53138 | -0.5881  | -1.14048 | -0.78359 | -0.73016 | -0.48543 | -0.65006 | -0.85688 |
| Q70J99 | Protein unc UNC13D      | -0.33545 | -0.37132 | -0.28796 | -0.39713 | -0.62018 | -0.47079 | -0.48694 | -0.59354 | -0.68476 | -0.59938 |
| Q70Z53 | Protein FR/ FRA10AC1    | -1.02445 | -1.01568 | -1.88753 | -1.36976 | -2.59991 | -1.04439 | -1.42531 | -1.53434 | -1.74959 | -1.54137 |
| Q71SY5 | Mediator o MED25 ACI    | -3.43539 | -4.44392 | -1.53138 | -1.67557 | -2.84503 | -1.87447 | -1.51019 | -1.91119 | -1.65748 | -1.42986 |
| Q71U36 | Tubulin alp TUBA1A TL   | 0.336401 | -0.22886 | -0.93423 | -0.52738 | -0.40675 | -0.74009 | -0.19017 | -0.63055 | -0.96052 | -1.131   |
| Q71UI9 | Histone H2 H2AZ2 H2A    | 0.472419 | 0.75549  | 0.125779 | 0.511785 | 0.83834  | 0.512533 | 0.454912 | 0.433142 | 0.116973 | 0.476725 |
| Q71UM5 | 40S ribosor RPS27L      | 1.770518 | 2.023207 | 2.022248 | 1.656347 | 1.701583 | 1.959826 | 1.749192 | 1.86507  | 1.896164 | 1.550629 |
| Q75N03 | E3 ubiquiti CBLL1 HAK   | -1.46855 | -1.27399 | -0.6734  | -1.06413 | -0.91341 | -1.26303 | -1.29406 | -1.24936 | -0.74169 | -0.51584 |
| Q75N90 | Fibrillin-3 [ FBN3 KIAA | -0.57289 | 0.09067  | 0.042266 | -0.39428 | -0.37109 | -0.03877 | -0.35819 | 0.005714 | -0.02377 | 0.228701 |
| Q75QN2 | Integrator INTS8 C8or   | -0.70499 | -0.63656 | -0.76983 | -0.25303 | -0.39046 | -0.37906 | -0.5697  | -0.51785 | -0.3505  | -0.33192 |
| Q76N32 | Centrosom CEP68 KIAA    | -1.26546 | -1.18265 | -1.7632  | -1.32193 | -1.35199 | -1.81558 | -1.71329 | -2.80735 | -1.81444 | -1.58054 |
| Q7KZ85 | Transcripti SUPT6H KIA  | -0.86139 | -0.8052  | -1.06898 | -0.81207 | -0.99505 | -0.56866 | -0.88887 | -0.74846 | -0.80091 | -0.96384 |
| Q7KZF4 | Staphyloco SND1 TDRE    | 0.121991 | 0.474243 | 0.26254  | 0.201957 | 0.248136 | 0.201063 | 0.213164 | 0.144077 | 0.16246  | 0.170646 |
| Q7KZI7 | Serine/thre MARK2 EM    | -1.78041 | -1.73749 | -1.30578 | -1.13236 | -1.8428  | -1.1682  | -1.68723 | -1.17016 | -1.9349  | -1.33245 |
| Q7L014 | Probable A DDX46 KIA    | 0.277504 | 0.564016 | 0.369473 | 0.176878 | 0.207442 | 0.259387 | -0.06275 | 0.002223 | 0.262286 | 0.564161 |
| Q7L0Y3 | tRNA meth TRMT10C P     | -0.62742 | -0.47873 | -0.3924  | -0.62408 | -0.40024 | -0.5366  | -0.7997  | -0.94386 | -0.93546 | -0.65524 |
| Q7L1Q6 | Basic leucir BZW1 BZAF  | 1.074788 | 1.015513 | -0.28821 | 0.309328 | 0.554186 | 0.70753  | 0.792409 | 0.878433 | -0.07748 | -0.32082 |
| Q7L1W4 | Volume-reg LRR8D LR     | -1.76553 | -1.33171 | -1.2276  | -1.47045 | -1.53382 | -1.52083 | -1.42531 | -1.33342 | -1.95361 | -1.41799 |
| Q7L2E3 | ATP-depen DHX30 DD      | -0.46019 | -0.4761  | 0.068531 | -0.0126  | 0.029444 | 0.090032 | -0.45305 | 0.061639 | -0.08746 | -0.04495 |

|        |                        |          |          |          |          |          |          |          |          |          |          |
|--------|------------------------|----------|----------|----------|----------|----------|----------|----------|----------|----------|----------|
| Q7L2H7 | Eukaryotic EIF3M HFLI  | -1.25096 | -0.82402 | -1.00782 | -0.40255 | -1.49139 | -0.73151 | -0.93988 | -1       | -1.28011 | -0.93934 |
| Q7L2J0 | 7SK snRNA MEPCE BCI    | -3.25096 | -2.46529 | -2.26083 | -2.67779 | -2.50377 | -2.1351  | -0.96963 | -1.40742 | -2.26625 | -2.5867  |
| Q7L3B6 | Hsp90 co-c CDC37L1 C   | -1.08746 | -0.79667 | -0.4761  | -0.52356 | -0.87199 | -0.68684 | -0.81762 | -0.93289 | -0.87368 | -0.44184 |
| Q7L4I2 | Arginine/spec RSRC2    | -0.80735 | -0.85261 | -0.55586 | -0.33231 | -0.5375  | -0.27621 | -0.5283  | -0.79607 | -0.32281 | -0.29345 |
| Q7L592 | Protein arg NDUFAF7 C  | -0.2949  | -0.16506 | -0.20495 | -0.19444 | -0.17365 | -0.24998 | -0.32577 | -0.09464 | -0.57791 | -0.37145 |
| Q7L5N1 | COP9 signa COPS6 CSN   | 0.347397 | 0.220163 | 0.112475 | 0.088535 | 0.226636 | -0.05477 | -0.11921 | 0.043058 | 0.322735 | 0.276981 |
| Q7L7L0 | Histone H2 H2AW HIST   | 0.543974 | 0.972444 | 1.738914 | 2.147448 | 2.027621 | 1.954196 | 2.16651  | 2.06301  | 1.191761 | 1.124978 |
| Q7L9L4 | MOB kinas MOB1B MC     | 1.850016 | 1.92805  | 2.227674 | 2        | 2.15831  | 1.975197 | 2.08445  | 2.123382 | 2.356402 | 2.539254 |
| Q7LBC6 | Lysine-spec KDM3B C5   | 0.369386 | 0.688743 | 0.0912   | 0.266039 | 0.287275 | 0.228224 | 0.26153  | 0.224234 | 0.263399 | 0.138098 |
| Q7LBR1 | Charged m CHMP1B C     | -1.666   | -1.37151 | -1.43335 | -1.47045 | -0.88567 | -1.01097 | -0.84493 | -0.85834 | -1.02857 | -1.09134 |
| Q7LDG7 | RAS guanyl RASGRP2 C   | -0.43539 | -0.19599 | -1.33737 | -0.82095 | -1.53382 | -0.21601 | -0.83623 | -1.21925 | -0.766   | -0.63579 |
| Q7LG56 | Ribonucleo RRM2B P5    | -1.87245 | -1.34156 | -0.38163 | -0.84549 | -1.19052 | -0.66069 | -0.06809 | -0.25618 | -0.57089 | -0.99118 |
| Q7RTP6 | [F-actin]-m MICAL3 KIA | -3.80735 | -3.77649 | -3.62449 | -2.0126  | -3.27798 | -3.0902  | -3.3322  | -2.07039 | -3.30319 | -3.30433 |
| Q7RTR2 | NLR family NLRC3 NOI   | -3.68589 | -3.95397 | -3.36146 | -3.84549 | -3.59991 | -3.40054 | NA       | NA       | -4.25739 | -4.1788  |
| Q7RTV0 | PHD finger PHF5A       | -0.25819 | -0.17917 | -0.20945 | -0.36012 | -0.14188 | -0.43386 | -0.53964 | -0.2978  | -0.03665 | 0.03065  |
| Q7Z2K6 | Endoplasm ERMP1 FXN    | -0.3769  | -0.65057 | -1.04689 | -1.3316  | -0.81996 | -0.7972  | -1.57114 | -1.20129 | -1.39484 | -1.50286 |
| Q7Z2T5 | TRMT1-like TRMT1L C1   | -0.27277 | -0.29298 | 0.148099 | -0.42764 | -0.40024 | 0.053638 | -0.19704 | 0.131245 | 0.168877 | 0.305908 |
| Q7Z2W4 | Zinc finger ZC3HAV1 Z  | -0.48983 | -0.53703 | -0.84937 | -0.86658 | -1.10027 | -0.97554 | -0.83381 | -0.92752 | -1.05203 | -1.05262 |
| Q7Z333 | Probable h SETX ALS4 I | -0.08104 | -0.24136 | -0.16069 | 0.148863 | 0.036712 | -0.10188 | -0.17377 | -0.10076 | -0.14365 | -0.08663 |
| Q7Z392 | Trafficking TRAPPC11 I | -1.11346 | -0.63051 | -1.39901 | -1.95892 | -2.14197 | -2.09717 | -1.43858 | -2.22289 | -1.76705 | -1.58548 |
| Q7Z3B4 | Nucleopori NUP54       | -0.15097 | -0.34793 | 0.139302 | -0.10963 | -0.04043 | -0.29547 | -0.05686 | -0.47896 | 0.139545 | 0.240048 |
| Q7Z3D6 | D-glutamat DGLUCY C1   | 0.006049 | -0.02756 | -2.57719 | -3.38606 | -0.60274 | -0.47115 | 0.383675 | 0.313838 | -0.49584 | -1.06333 |
| Q7Z3J2 | VPS35 endo VPS35L C1   | -0.44137 | -0.55913 | -1.12229 | -1.09806 | -1.79279 | -0.93341 | -0.67361 | -0.91899 | -1.16259 | -1.04515 |
| Q7Z3K3 | Pogo trans POGZ KIAA   | -0.55497 | -0.90933 | -0.72172 | -0.9366  | -0.69302 | -0.7304  | -0.73016 | -1.09464 | -0.62544 | -0.49075 |
| Q7Z406 | Myosin-14 MYH14 KIA    | 0.27733  | 0.264343 | 0.486517 | 0.612957 | 0.587361 | 0.717896 | 0.501387 | 0.643377 | 0.719778 | 1.075135 |
| Q7Z417 | Nuclear fra NUFIP2 KIA | 0.110807 | -0.02359 | 0.69262  | 1.286367 | 0.680858 | 0.710493 | -1.779   | -1.8107  | 0.591235 | 0.385981 |
| Q7Z422 | SUZ domai SZRD1 C1o    | -2.98793 | -1.52015 | -1.94642 | -1.23078 | -2.79256 | -2.06711 | -1.89162 | -2.80735 | -1.95361 | -1.38294 |
| Q7Z434 | Mitochond MAVS IPS1    | -0.69319 | -0.64791 | -0.70387 | -0.74614 | -0.6119  | -0.78295 | -1.35819 | -0.60357 | -1.10764 | -0.87299 |
| Q7Z460 | CLIP-associ CLASP1 KIA | -0.6002  | -0.20889 | -0.10658 | -0.37156 | -0.06944 | -0.20553 | -0.25712 | -0.44535 | -0.34669 | -0.68536 |
| Q7Z478 | ATP-depen DHX29 DD)    | -3.26612 | -2.78545 | -2.47224 | -2.59756 | -1.49139 | -1.5366  | -2.69938 | -3.12706 | -1.3505  | -1.45391 |
| Q7Z4G1 | COMM dor COMMMD6 I     | -0.42917 | -0.10551 | -1.20579 | -1.08735 | -1.24342 | -1.63641 | -1.76715 | -1.92719 | -1.65323 | -1.68018 |
| Q7Z4H3 | 5'-deoxynu HDDC2 C6c   | -0.46019 | -0.59474 | -0.35646 | -0.50564 | -0.5231  | -0.61813 | -0.43219 | -0.34066 | -0.17524 | -0.13441 |
| Q7Z4H7 | HAUS augn HAUS6 DG     | 0.620882 | 0.680507 | 0.994139 | 0.712931 | 0.863612 | 0.788496 | 0.779312 | 0.673772 | 0.797895 | 0.416143 |

|        |                                     |          |          |          |          |          |          |          |          |          |          |
|--------|-------------------------------------|----------|----------|----------|----------|----------|----------|----------|----------|----------|----------|
| Q7Z4H8 | Protein O- $\epsilon$ POGLUT3 K     | -0.71878 | -0.60457 | -0.24716 | -0.56872 | -1.14067 | -0.84198 | -0.3847  | -0.46534 | -0.51899 | -0.399   |
| Q7Z4Q2 | HEAT repeat HEATR3                  | -2.37673 | -1.51588 | -2.03731 | -1.94585 | -2.77259 | -3.40517 | -1.71368 | -2.36468 | -2.22502 | -1.61036 |
| Q7Z4S6 | Kinesin-like KIF21A KIA             | -2.98793 | -1.30256 | -1.19153 | -1.20163 | -2.74193 | -1.50524 | -1.30666 | -1.63743 | -1.4892  | -1.56737 |
| Q7Z4V5 | Hepatoma- HDGFL2 HC                 | 1.103313 | 1.303181 | 0.461277 | 0.573941 | 0.641969 | 0.413696 | 0.253441 | 0.326411 | 0.086908 | -0.26127 |
| Q7Z4W1 | L-xylulose reductase DCXR SDR2      | 0.180846 | 0.144252 | -0.41764 | -0.23816 | 0.141554 | -0.2115  | 0.04087  | -0.16993 | 0.418285 | 0.530855 |
| Q7Z569 | BRCA1-associated BRAP RNF5          | -2.76553 | -1.94642 | -1.39183 | -0.9386  | -1.47063 | -1.1375  | -1.68012 | -1.37737 | -1.39941 | -0.84888 |
| Q7Z591 | Microtubule-associated AKNA KIAA    | -1.19785 | -1.32752 | -0.96413 | -1.50733 | -0.73913 | -1.13841 | -1.71329 | -1.6735  | -1.27685 | -1.10022 |
| Q7Z5K2 | Wings apart WAPL FOE                | -0.46804 | -0.37541 | -0.37634 | -0.4656  | -0.41723 | -0.45101 | -0.63184 | -0.6219  | -0.25537 | -0.32829 |
| Q7Z5L9 | Interferon inducible IRF2BP2        | -0.89018 | -0.87124 | -0.59383 | -0.67628 | 0.046194 | 0.174644 | -0.99644 | -0.80742 | -0.26542 | -0.34865 |
| Q7Z5R6 | Amyloid beta-associated APBB1IP PF  | -0.26546 | -0.57138 | 0.44154  | 0.210689 | 0.318408 | 0.218458 | 0.162805 | 0.163187 | 0.301322 | 0.309837 |
| Q7Z614 | Sorting nexin SNX20 SLIC            | -0.22948 | -0.01963 | -0.40726 | -0.5787  | -0.83173 | -0.64351 | -0.43219 | -0.45372 | -0.55695 | -0.7713  |
| Q7Z6B0 | Coiled-coil CCDC91 GC               | -0.2608  | -0.12487 | 0.019365 | 0.143195 | -0.2076  | -0.15565 | 0.113114 | -0.06439 | 0.126316 | -0.12473 |
| Q7Z6E9 | E3 ubiquitin ligase RBBP6 P2P       | 0.006049 | -0.10093 | -0.03953 | -0.11078 | 0.14828  | -0.11958 | -0.06274 | 0.017074 | -0.18593 | -0.00888 |
| Q7Z6I6 | Rho GTPase-associated ARHGAP30      | -0.34848 | -0.50433 | -0.34198 | -0.58863 | -0.26608 | -0.19131 | -0.29134 | -0.28759 | -0.40463 | -0.26539 |
| Q7Z6L1 | Tectonin beta-associated TECPR1 KIA | -1.02651 | -1.14173 | -1.16517 | -1.22153 | -0.95786 | -0.92073 | -1.31548 | -1.16614 | -0.54678 | -0.71945 |
| Q7Z6M1 | Rab9 effector RABEPK RA             | -0.27277 | 0.049819 | 0.994139 | 1.828702 | 0.859519 | 0.514027 | 0.372201 | -0.37737 | 0.696808 | 0.717361 |
| Q7Z6M4 | Transcription factor MTERF4 M       | -1.19438 | -1.26459 | -1.26017 | -1.40944 | -1.93501 | -1.29759 | -1.8473  | -1.82639 | -1.61642 | -2.00646 |
| Q7Z6Z7 | E3 ubiquitin ligase HUWE1 KIA       | -0.72489 | -0.45472 | -0.61849 | -0.59756 | -0.50188 | -0.70454 | -0.53224 | -0.53519 | -0.55003 | -0.46609 |
| Q7Z7A1 | Centriolin ( CNTRL CEP              | -1.82873 | -1.36146 | -1.63438 | -1.41146 | -1.61127 | -1.65999 | -1.95312 | -1.58773 | -2.0287  | -1.32041 |
| Q7Z7F7 | 39S ribosomal MRPL55 UF             | -1.54927 | -0.89237 | -0.51124 | -0.14853 | -0.36949 | -0.64344 | -0.30539 | -1.07764 | -0.50566 | -0.49451 |
| Q7Z7G8 | Vacuolar protein VPS13B CH          | 2.142729 | 2.197389 | 2.492373 | 2.186556 | 2.404308 | 2.531145 | 2.182377 | 2.335603 | 2.612206 | 2.13408  |
| Q7Z7H5 | Transmembrane TMED4 ER              | -1.59046 | -1.59939 | -1.65545 | -0.74746 | -0.9417  | -0.1315  | -1.76766 | -1.31907 | -1.83112 | -1.58054 |
| Q7Z7K0 | COX assembly CMC1 C3orf             | 0.799254 | 0.9501   | 0.22796  | 0.072831 | 0.123467 | -0.37761 | 0.036617 | 0.240344 | -0.0183  | 0.152784 |
| Q7Z7K6 | Centromere CENPV PRR                | 0.004817 | 0.058271 | -0.13901 | -0.23341 | 0.356196 | 0.322569 | 0.041734 | 0.109411 | 0.7084   | 0.771547 |
| Q86SX6 | Glutaredoxin GLRX5 C14orf           | -0.97798 | -1.34308 | -0.93587 | -1.11475 | -1.08648 | -1.01608 | -1.71838 | -1.31091 | -0.88109 | -1.10362 |
| Q86TI0 | TBC1 domain TBC1D1 KIAA             | -0.6099  | -0.64404 | -0.72334 | -0.50726 | -0.89546 | -0.70738 | -0.84036 | -0.63462 | -0.65005 | -0.89275 |
| Q86TI2 | Dipeptidyl aminopeptidase DPP9 DPRP | 0.969368 | 1.049819 | 0.288798 | 0.126054 | 0.107446 | 0.308753 | 0.235488 | 0.232173 | 0.436099 | 0.31305  |
| Q86TJ2 | Transcription factor TADA2B AC      | -1.45187 | -1.34156 | -1.53138 | -1.63604 | -0.76702 | -1.31647 | -0.88216 | -0.95491 | -1.30319 | -1.70487 |
| Q86TP1 | Exopolyphosphate PRUNE1 PF          | -1.53833 | -1.37972 | -1.03294 | -1.34169 | -1.55651 | -1.73727 | -1.35456 | -1.52157 | -1.01178 | -1.19124 |
| Q86TU7 | Actin-histone SETD3 C14orf          | -2.06415 | -1.75056 | -1.81303 | -1.15074 | -2.23002 | -2.36452 | -1.34848 | -1.80638 | -1.66619 | -1.11668 |
| Q86TX2 | Acyl-coenzyme A ACOT1 CTE           | -0.51184 | -0.21583 | -0.60912 | -0.62307 | -0.88862 | -0.64011 | 0.075495 | -0.16962 | 0.06454  | -0.0981  |
| Q86U28 | Iron-sulfur cluster ISCA2 HBLH      | 0.207697 | 0.109733 | 0.195266 | 0.24497  | 0.130347 | 0.13035  | 0.040049 | 0.017827 | 0.019007 | 0.208956 |
| Q86U38 | Nucleolar protein NOP9 C14orf       | 0.603656 | 0.596566 | -0.03771 | -0.11437 | 0.27981  | 0.170571 | 0.310186 | 0.2421   | -0.12191 | -0.22554 |



|        |                         |          |          |          |          |          |          |          |          |          |          |
|--------|-------------------------|----------|----------|----------|----------|----------|----------|----------|----------|----------|----------|
| Q86U42 | Polyadenyl PABPN1 PA    | 0.229304 | 0.144576 | 0.402309 | 0.198904 | 0.492844 | 0.398549 | 0.127235 | 0.294183 | 0.372796 | 0.573177 |
| Q86U44 | N6-adenos METTL3 M      | -0.97056 | -0.77789 | -0.76204 | -0.53492 | -0.81025 | -0.77294 | -0.54079 | -1.01348 | -0.89194 | -0.6811  |
| Q86U86 | Protein pol PBRM1 BAI   | -1.46855 | -1.27399 | -1.14768 | -1.2909  | -1.15697 | -1.07861 | -0.87276 | -0.93289 | -0.81444 | -0.98055 |
| Q86UA1 | Pre-mRNA- PRPF39        | -1.13993 | -0.57138 | -2.30256 | -3.75803 | -3.2076  | -1.83494 | -1.91073 | -1.82753 | -2.1281  | -1.85688 |
| Q86UE4 | Protein LYF MTDH AEG    | 0.539081 | 0.697125 | 0.405256 | 0.108706 | 0.3249   | -0.03877 | 0.307295 | -0.24936 | 0.206137 | 0.291517 |
| Q86UE8 | Serine/thrε TLK2        | -0.88359 | -0.88753 | -1.08844 | -0.4361  | -1.69302 | -1.0902  | -1.29406 | -0.88982 | -0.86507 | -0.94785 |
| Q86UK7 | E3 ubiquitin ZNF598     | -2.64889 | -2.22806 | -1.53059 | -1.77078 | -2.16821 | -1.81609 | -1.65342 | -2.31914 | -1.92672 | -1.63174 |
| Q86UL3 | Glycerol-3- GPAT4 AGF   | -2.53727 | -1.77649 | -1.45457 | -2.71621 | -3.07635 | -1.91511 | -3.13955 | -2       | -3.45003 | -2.41799 |
| Q86UP2 | Kinectin (C) KTN1 CG1 I | 0.055103 | 0.265778 | 0.216811 | -0.0013  | 0.251215 | 0.197501 | -0.03394 | 0.051762 | 0.389479 | 0.31668  |
| Q86UU0 | B-cell CLL/I BCL9L DLNI | -1.01217 | -0.67963 | -0.63656 | -0.15899 | -0.36151 | -0.37906 | -0.22666 | -0.31194 | -0.05772 | 0.056413 |
| Q86UV5 | Ubiquitin c USP48 USP   | -0.06104 | -0.10414 | 0.258459 | -0.058   | -0.05329 | 0.148319 | 0.055691 | -0.15318 | 0.241248 | -0.05003 |
| Q86UW6 | NEDD4-bin N4BP2 B3B     | -3.03684 | -2.38163 | -2.12199 | -3.38606 | -3.35199 | -3.18641 | -3.61599 | -3.72935 | -3.30319 | -2.34873 |
| Q86UX7 | Fermitin fa FERMT3 KII  | 0.385219 | 0.550038 | 0.111448 | 0.076399 | -0.16588 | 0.123248 | 0.15532  | -0.02706 | -0.15934 | 0.04857  |
| Q86V48 | Leucine zip LUZP1       | -0.46855 | -0.29298 | 0.193132 | -0.2986  | -0.04532 | -0.10188 | -0.06274 | 0.02272  | -0.54314 | -0.60054 |
| Q86V81 | THO compl ALYREF ALY    | 0.337628 | 0.408547 | -0.0095  | 0.160401 | 0.365132 | 0.255291 | 0.181034 | 0.318017 | -0.02676 | -0.11164 |
| Q86VM9 | Zinc finger ZC3H18 NF   | -0.19478 | 0.001789 | -0.48699 | -0.0126  | -0.27798 | -0.72247 | -0.30035 | -0.2091  | -0.45003 | -0.28803 |
| Q86VN1 | Vacuolar pi VPS36 C13   | -1.21002 | -1.3195  | -1.75002 | -1.3377  | -0.67339 | -1.44448 | -1.18536 | -1.71049 | -1.4245  | -1.32636 |
| Q86VP3 | Phosphofu PACS2 KIA     | -2.60942 | -1.1305  | -1.32193 | -1.96285 | -0.69302 | -1.81558 | -1.11718 | -1.61973 | -2.1913  | -0.99118 |
| Q86VP6 | Cullin-asso CAND1 KIA   | 0.62032  | 0.828368 | 0.45446  | 0.299168 | 0.207442 | 0.23173  | 0.475158 | 0.506536 | 0.67925  | 0.625686 |
| Q86VQ1 | Glucocortic GLCCI1      | -0.83954 | -1.20945 | -0.50348 | -1.18728 | -1.09212 | -1.1375  | -1.01027 | -1.1193  | -0.88235 | -0.93088 |
| Q86VR2 | Reticuloph RETREG3 F    | -1.32496 | -1.4761  | -1.57719 | -1.11757 | -1.37109 | -1.33015 | -1.81078 | -1.70916 | -2.16728 | -1.79235 |
| Q86VS8 | Protein Ho HOOK3        | -0.7835  | -0.71596 | -0.67963 | -0.06413 | -0.2076  | 0.016302 | -0.19704 | -0.42269 | -1.09752 | -1.12956 |
| Q86VU5 | Catechol O COMTD1 U     | -0.49394 | -0.64874 | -0.84488 | -0.38606 | -0.88567 | -0.50524 | -0.313   | -0.52607 | -0.79796 | -1.22979 |
| Q86W42 | THO compl THOC6 WD      | -0.35566 | -0.52015 | -0.70483 | -0.51457 | -0.53382 | -0.35091 | -0.33865 | -0.26992 | -0.54314 | -0.18382 |
| Q86W50 | RNA N6-ad METTL16 N     | -1.22239 | -0.83094 | -0.39057 | -0.74038 | 0.086588 | 0.074547 | -0.66562 | -0.84286 | -0.73947 | -0.12042 |
| Q86WA6 | Valacyclovi BPHL MCN    | -0.94062 | -1.19153 | -1.23676 | -1.21613 | -1.47063 | -0.9783  | -0.75585 | -0.46949 | -0.91754 | -0.97369 |
| Q86WB0 | Nuclear-int ZC3HC1 NII  | -0.79679 | -0.90202 | -0.34853 | -0.35431 | -0.32379 | -0.50524 | -0.7388  | -0.47166 | -0.78165 | -0.8893  |
| Q86WJ1 | Chromodo CHD1L ALC      | 0.524323 | 0.388614 | -0.44425 | -0.10576 | -0.01113 | 0.434117 | 0.263157 | 0.151552 | 0.468765 | 0.158587 |
| Q86WN1 | F-BAR and FCHSD1 UN     | -0.22449 | -0.02492 | -0.24598 | -0.37788 | -0.51785 | -0.18802 | -0.46007 | -0.18938 | -0.14886 | -0.50324 |
| Q86WR0 | Coiled-coil CCDC25      | 0.963311 | 1.051666 | 0.824296 | 0.599523 | 0.917164 | 0.872709 | 1.013733 | 1.059467 | 0.900362 | 0.853801 |
| Q86WV1 | Src kinase- SKAP1 SCA   | -0.74934 | -0.80074 | -1.0342  | -0.90112 | -1.04058 | -0.7881  | -0.90856 | -1.07703 | -1.22662 | -1.07378 |
| Q86WV6 | Stimulator STING1 ERI   | -0.71491 | -0.25992 | 0.137504 | -0.31411 | 0.161638 | 0.110424 | -1.94973 | -3.80735 | -0.40564 | -0.12473 |
| Q86X29 | Lipolysis-st LSR LISCH  | -2.29498 | -3.08208 | -1.35147 | -1.56009 | -0.79256 | -0.70454 | -2.67715 | -2.37929 | -2.21698 | -2.40626 |

|        |                        |          |          |          |          |          |          |          |          |          |          |
|--------|------------------------|----------|----------|----------|----------|----------|----------|----------|----------|----------|----------|
| Q86X53 | Glutamate-ERICH1 HSF   | 0.488887 | 0.474243 | 0.886471 | 0.4899   | 0.181447 | 0.669851 | 0.611993 | 0.577309 | 0.843274 | 0.631411 |
| Q86X55 | Histone-arç CARM1 PRI  | -1.1669  | -1.2752  | -0.91942 | -0.79086 | -1.32622 | -1.29847 | -0.87609 | -1.19295 | -1.63165 | -1.15398 |
| Q86X76 | Deaminate NIT1         | -1.38702 | -0.78991 | -1.00782 | -0.20163 | -0.9852  | -0.58496 | -0.61599 | -0.68266 | -0.77357 | -0.71937 |
| Q86X95 | Corepressc CIR1 CIR    | -3.37126 | -1.60064 | 0.275973 | 0.349267 | 0.181447 | 0.304334 | 0.399607 | 0.326501 | 0.537028 | 0.57905  |
| Q86XP3 | ATP-depen DDX42        | -0.39497 | -0.18709 | -0.40528 | -0.61918 | -0.48097 | -0.4765  | -0.4575  | -0.52623 | -0.36257 | -0.19236 |
| Q86XR8 | Centrosom CEP57 KIAA   | -0.58193 | -0.62449 | -0.93147 | -0.98751 | -0.59991 | -0.60977 | -0.92038 | -0.6644  | -1.04793 | -0.61402 |
| Q86XT2 | Vacuolar pı VPS37D WI  | 0.836501 | 1.019365 | 0.545434 | 0.626185 | 0.336725 | 0.506353 | 0.418869 | 0.35811  | 0.379237 | -0.04495 |
| Q86Y39 | NADH dehy NDUFA11      | 0.371969 | 0.532014 | -0.03953 | 0.165737 | -0.05302 | -0.15565 | -0.07346 | 0        | -0.01898 | 0.147127 |
| Q86YP4 | Transcriptik GATAD2A   | -0.16759 | -0.09316 | -0.04069 | -0.3099  | -0.18206 | -0.07285 | -0.03159 | -0.00152 | 0.232165 | 0.04609  |
| Q86YS7 | C2 domain C2CD5 CDP    | -0.63743 | -0.59474 | -1.20945 | -0.74746 | 0.408774 | 0.30098  | 0.530721 | 0.484651 | -0.95361 | -0.83303 |
| Q86YV0 | RAS proteir RASAL3     | 0.195776 | 0.338083 | 0.182472 | -0.14611 | -0.27798 | 0.021695 | 0.135912 | -0.29078 | -0.13327 | 0.069124 |
| Q86YV5 | Inactive tyr PRAG1 SGK | -2.80486 | -1.8625  | -2.84205 | -3.07272 | -2.63733 | -3.0315  | -1.94447 | -2.39734 | -1.32976 | -1.06779 |
| Q8IU68 | Transmeml TMC8 EVEF    | -3.72489 | -3.28345 | -2.03953 | -1.91475 | -3.27798 | -1.83494 | -2.9301  | -1.86876 | -2.28011 | -1.90578 |
| Q8IU81 | Interferon İRF2BP1     | -2.98793 | -1.52015 | -1.03953 | -0.98751 | -0.22487 | -0.96758 | -0.9898  | -1.02308 | -1.01898 | -1.03585 |
| Q8IU85 | Calcium/ca CAMK1D C    | -1.43539 | -0.91667 | -1.08017 | -0.66558 | -0.95606 | -1.07861 | -0.83577 | -2.22239 | -1.36257 | -0.86491 |
| Q8IUE6 | Histone H2 H2AC21 HI   | -0.3832  | -0.69862 | 0.30862  | 0.346699 | 0.280421 | 0.873569 | 0.362691 | 0.38327  | 0.39003  | 0.147453 |
| Q8IUF8 | Ribosomal RIOX2 MDI    | 0.514573 | 0.603045 | -0.39696 | -0.97513 | 0.014797 | 0.254814 | 0.299241 | 0.530515 | -0.88235 | -0.39453 |
| Q8IUH3 | RNA-bindin RBM45 DR    | -1.85491 | -1.4056  | -0.9958  | -1.87975 | -0.85493 | -1.04616 | -1.12275 | -1.87012 | -1.00827 | -0.90028 |
| Q8IUI8 | Cytokine re CRLF3 CRE  | 0.124835 | 0.136527 | -0.20048 | -0.50389 | -0.09342 | -0.24225 | -0.15638 | -0.33201 | 0.068593 | 0.277731 |
| Q8IURO | Trafficking TRAPPC5    | 0.63553  | 0.634901 | 0.384943 | 0.326502 | 0.660657 | 0.529894 | 0.345502 | 0.389254 | 0.453989 | 0.698146 |
| Q8IUR7 | Armadillo r ARMC8 S8   | -2.85042 | -2.34156 | -2.05565 | -1.98751 | -2.55552 | -3.28951 | -2.41163 | -1.76783 | -2.45003 | -3.39453 |
| Q8IV04 | Carabin (TE TBC1D10C   | -1.20486 | -1.35948 | -1.26514 | -1.07737 | -1.65974 | -1.14739 | -0.96905 | -1.11981 | -1.76638 | -0.99306 |
| Q8IV38 | Ankyrin reç ANKMY2     | -0.55497 | -0.62449 | -0.46529 | -0.92663 | -0.66918 | -0.43706 | -0.90115 | -0.68266 | -0.45003 | -0.42392 |
| Q8IV53 | DENN dom DENND1C f     | 0.028061 | 0.048404 | 0.136844 | 0.205189 | -0.03138 | 0.061341 | 0.210077 | 0.116663 | 0.168247 | 0.028631 |
| Q8IV63 | Inactive sei VRK3      | -2.98793 | -2.03953 | -2.12199 | -2.06413 | -2.47063 | -2       | -3.09516 | -2.76783 | -2.58496 | -2.2402  |
| Q8IVB5 | LIX1-like pr LIX1L     | 0.302347 | 0.196395 | 1.022309 | 0.726167 | 0.724561 | 1.08229  | 0.754451 | 0.745082 | 1.145497 | 0.882281 |
| Q8IVD9 | NudC domı NUDCD3 KI    | -2.60942 | -1.90202 | -2.38163 | -1.8011  | -2.59991 | -3.0902  | -3.13955 | -3.97728 | -1.67243 | -1.99118 |
| Q8IVH4 | Methylmal MMAA         | -0.37126 | -0.17823 | -0.64264 | -0.44461 | -1.15697 | -0.42234 | -0.35819 | -0.62855 | -0.32665 | -0.58718 |
| Q8IVT5 | Kinase supı KSR1 KSR   | -1.45197 | -1.37112 | -1.34611 | -1.9394  | -1.61666 | -1.60902 | -1.57386 | -1.83877 | -1.99732 | -1.84085 |
| Q8IW45 | ATP-depen NAXD CAR     | -1.30986 | -1.33171 | -0.64874 | -1.61667 | -1.95606 | -1.5366  | -1.15087 | -1.18286 | -1.32665 | -1.04495 |
| Q8IWB7 | WD repeat WDFY1 FEN    | -0.51624 | -0.1183  | -0.05207 | -0.50584 | -0.34745 | -0.2287  | -0.24502 | -0.17734 | -0.28637 | -0.45391 |
| Q8IWI9 | MAX gene- MGA KIAAC    | -3.80735 | -2.2276  | -2.20945 | -3.75803 | -2.89947 | -2.79647 | -2.89162 | -3.33342 | -3.16993 | -2.34873 |
| Q8IWJ2 | GRIP and cı GCC2 KIAAI | -1.06878 | -1.07685 | -0.56645 | -0.82364 | -0.70023 | -0.47865 | -0.71534 | -0.57712 | -0.69032 | -0.69318 |

|         |                                            |          |          |          |          |          |          |          |          |          |          |
|---------|--------------------------------------------|----------|----------|----------|----------|----------|----------|----------|----------|----------|----------|
| Q8IWS0  | PHD finger PHF6 CENP                       | -0.22948 | 0.068531 | 0.083328 | -0.2909  | -0.21621 | 0.14543  | -0.16227 | -0.08854 | -0.30902 | -0.63448 |
| Q8I WV7 | E3 ubiquitin UBR1                          | -0.67565 | -0.5541  | -0.48153 | -0.15899 | -0.13231 | -0.5366  | -0.37137 | -0.17638 | -0.51592 | -0.07727 |
| Q8I WV8 | E3 ubiquitin UBR2 C6or                     | 0.716207 | 0.723647 | 0.70941  | 0.754423 | 0.584963 | 0.624491 | 0.608641 | 0.104869 | 0.139217 | 0.455403 |
| Q8I WW6 | Rho GTPase ARHGAP12                        | -0.16011 | -0.10093 | -0.07195 | -0.25303 | -0.1487  | -0.5366  | -0.02061 | -0.31194 | -0.06263 | -0.21945 |
| Q8I WX8 | Calcium homeostasis modulator 1            | 1.414658 | 1.685443 | 0.892367 | 1.163572 | 1.007716 | 1.324273 | 1.035784 | 1.147351 | 0.888526 | 0.771607 |
| Q8I WY9 | Codanin-1 CDAN1 UNIPROT                    | -1.80798 | -1.99047 | -1.64972 | -1.91495 | -2.57908 | -2.3795  | -1.90181 | -2.52383 | -1.96303 | -1.78667 |
| Q8I WZ3 | Ankyrin repeat domain 1                    | -1.74823 | -1.64275 | -1.41855 | -1.75803 | -1.19302 | -1.26303 | -1.46921 | -1.63359 | -1.51221 | -1.79889 |
| Q8I WZ8 | SURP and CUGP1 SF4                         | -0.26948 | -0.32267 | 0.046245 | -0.31514 | 0.098507 | -0.24386 | -1.32227 | -0.99933 | -0.97214 | -0.73645 |
| Q8I X01 | SURP and CUGP2 KIAA1429                    | -0.69515 | -0.2276  | -0.18709 | -0.12439 | -0.31451 | -0.02203 | -0.25691 | -0.61096 | -0.29739 | -0.65524 |
| Q8I X12 | Cell division control protein 1            | 0.047256 | 0.003346 | 0.217504 | 0.204358 | 0.18799  | 0.100264 | 0.18077  | 0.088809 | 0.342525 | 0.135088 |
| Q8I XB1 | DnaJ homolog subfamily 10 member E         | -0.36344 | -0.03953 | -0.64874 | -0.63604 | -1.57755 | -1.02203 | -0.22069 | -0.50967 | -1.46297 | -1.1589  |
| Q8I XH7 | Negative elongation factor 1               | -0.6002  | -1.01568 | -1.19153 | -1.56009 | -1.06075 | -1.18641 | -1.23266 | -1.37737 | -1.39941 | -1.76377 |
| Q8I XI1 | Mitochondrial ribosomal protein RHO2       | -0.00014 | 0.066417 | -0.11689 | -0.25782 | -0.39704 | 0.000962 | -0.07086 | -0.03124 | -0.30427 | -0.47188 |
| Q8I XI2 | Mitochondrial ribosomal protein RHO1       | -1.72032 | -1.24155 | -1.51544 | -1.31768 | -0.98731 | -1.31468 | -1.09367 | -0.97171 | -2.11933 | -0.88013 |
| Q8I XM2 | Chromatin assembly factor 18 C17orf67      | 0.437802 | 0.625744 | 0.430625 | 0.221763 | 0.144603 | 0.553369 | 0.179978 | 0.216056 | 0.254879 | 0.421434 |
| Q8I XM3 | 39S ribosomal protein MRPL41               | 1.572788 | 1.87907  | 1.518467 | 1.51426  | 1.676212 | 1.762961 | 1.690171 | 1.982722 | 1.848521 | 1.203941 |
| Q8I XQ6 | Protein modulator PARP9                    | -1.30986 | -0.81714 | -0.45992 | -0.17306 | -0.75442 | -1.05571 | -0.51019 | -1.0115  | -0.85651 | -0.43584 |
| Q8I XT5 | RNA-binding protein RBM12B                 | -0.38295 | -0.12715 | -0.59808 | -0.57878 | -0.30441 | -1.46281 | -0.77093 | -0.9444  | -0.88856 | -0.30496 |
| Q8I Y17 | Patatin-like protein PNPLA6                | -2.68536 | -2.12199 | -1.69849 | -1.50564 | -4.01495 | -1.37197 | -1.52484 | -2.19592 | -2.1913  | -2.00888 |
| Q8I Y21 | Probable A-box domain protein DDX60        | -0.04393 | 0.27262  | 0.0154   | -0.16131 | -0.09892 | 0.130264 | -0.03583 | -0.06371 | 0.209388 | 0.003372 |
| Q8I Y37 | Probable A-box domain protein DHX37        | -3.57289 | -1.68589 | -1.49796 | -1.5787  | -1.49139 | -1.50524 | -1.66382 | -1.61973 | -1.37474 | -1.44184 |
| Q8I Y67 | Ribonucleoprotein RAVR1                    | -0.3999  | -0.52997 | -0.80441 | -0.44324 | -0.81309 | -0.76578 | -0.45796 | -0.70916 | -0.77495 | -0.60575 |
| Q8I Y81 | pre-rRNA 2 FTSJ3 SB92                      | 0.480222 | 0.414062 | 0.600476 | 0.533888 | 0.792405 | 0.791656 | 0.71843  | 0.684498 | 0.696808 | 0.521637 |
| Q8I YB3 | Serine/arginine-rich protein SRRM1         | -0.34792 | -0.30738 | 0.203328 | 0.037153 | 0.181447 | 0.105353 | 0.191366 | 0.131245 | 0.202044 | 0.323697 |
| Q8I YB7 | DIS3-like domain protein DIS3L2            | -0.55584 | -0.21313 | -0.09965 | -0.47682 | -0.12642 | -0.10055 | -1.03677 | -0.83635 | -0.26379 | -0.18968 |
| Q8I YB8 | ATP-dependent protein SUPV3L1              | 0.47587  | 1.040371 | 0.256521 | 0.392915 | 0.270452 | 0.652573 | 1.220198 | 1.177538 | 0.335069 | -0.0726  |
| Q8I YD1 | Eukaryotic translation initiation factor 2 | -2.5025  | -1.64874 | -0.79667 | -1.96285 | -1.62263 | -1.22422 | -1.94973 | -0.63743 | -0.848   | -1.13927 |
| Q8I YI6 | Exocyst core EXOC8                         | -1.37126 | -0.91667 | -2.08844 | -1.50564 | -0.90134 | -0.48809 | -2.85843 | -2.50018 | -2.02857 | -1.82517 |
| Q8I YJ3 | Synaptotagmin SYTL1 SLP1                   | -0.6246  | -0.89445 | -0.24812 | -0.50377 | -0.52894 | -0.26734 | -0.72697 | -0.56366 | -0.77902 | -0.73327 |
| Q8I YL3 | UPF0688 protein C1orf174                   | -1.1669  | -1.88753 | -1.66102 | -1.32193 | -1.03006 | -1.45943 | -1.13955 | -0.70116 | -2.10764 | -1.90578 |
| Q8I YM9 | E3 ubiquitin TRIM22 RN                     | -0.72489 | -0.50348 | -0.36146 | -0.42764 | -1.2076  | -0.78701 | -0.83577 | -0.922   | -0.90866 | -0.36573 |
| Q8I YQ7 | Threonine-binding protein THNSL1           | -0.27271 | -0.35897 | -0.18857 | -0.34439 | -0.29833 | 0.103732 | -0.02362 | -0.10274 | 0.156532 | 0.11545  |
| Q8I Z07 | Ankyrin repeat domain ANKRD13A             | -2.46211 | -1.57267 | -2.45121 | -2.49812 | -2.10539 | -2.54323 | -3.07401 | -1.93315 | -2.35183 | -2.32884 |

|        |              |             |          |          |          |          |          |          |          |          |          |          |          |
|--------|--------------|-------------|----------|----------|----------|----------|----------|----------|----------|----------|----------|----------|----------|
| Q8IZ57 | Neurensin-   | NRSN1 VM    | 1.229304 | 1.534708 | 1.179425 | 1.416605 | 1.303969 | 1.35435  | 1.134244 | 1.448985 | 1.384664 | 1.382591 |          |
| Q8IZ69 | tRNA (urac   | TRMT2A H    | -2.11561 | -1.29048 | -1.26083 | -1.16954 | -1.1163  | -1.47967 | -1.0106  | -0.91716 | -1.28999 | -1.0931  |          |
| Q8IZ83 | Aldehyde d   | ALDH16A1    | 0.139561 | -0.20299 | -0.37595 | -0.33413 | -0.4423  | -0.50832 | -0.51391 | -0.53286 | -0.46949 | -0.08065 |          |
| Q8IZD2 | Inactive his | KMT2E ML    | -0.78142 | -0.63098 | -0.31868 | -0.52537 | -0.10207 | -0.16789 | -0.41565 | -0.38189 | -0.3067  | -0.21289 |          |
| Q8IZD4 | mRNA-dec;    | DCP1B       | -2.89482 | -2.03953 | -1.31221 |          | -1       | -1.41009 | -1.17403 | -1.12832 | -0.78746 | -1.9906  | -1.44184 |
| Q8IZH2 | 5'-3' exorib | XRN1 SEP1   | -0.754   | -0.84779 | -0.8843  | -0.96035 | -0.9393  | -1.00102 | -1.17715 | -1.29956 | -1.05128 | -0.89028 |          |
| Q8IZL8 | Proline-, gl | PELP1 HM    | 0.683224 | 0.708509 | 0.87514  | 0.575354 | 1.064473 | 0.793116 | 0.785252 | 0.775393 | 0.843274 | 0.751934 |          |
| Q8IZP0 | Abl interac  | ABI1 SSH3E  | -0.56616 | -0.48154 | -1.49256 | -1.62441 | -1.81879 | -1.6603  | -1.27644 | -1.77711 | -1.73076 | -1.744   |          |
| Q8IZQ5 | Selenoprot   | SELENOH C   | 0.485165 | 0.827219 | 0.253253 | 0.263034 | 0.652528 | 0.364785 | 0.582964 | 0.559001 | 0.678029 | 0.799342 |          |
| Q8N0W3 | L-fucose kii | FCSK FUK    | -1.20832 | -1.36146 | -1.42286 | -0.95067 | -1.37109 | -1.05571 | -1.12832 | -1.53434 | -1.16024 | -1.13937 |          |
| Q8N0X4 | Citramaly-   | CLYBL CLB   | -0.33076 | -0.52576 | -0.80346 | -1.1815  | -0.5231  | -0.0614  | -0.52484 | -0.37737 | -0.04307 | -0.0726  |          |
| Q8N0X7 | Spartin (Sp  | SPART KIA   | -1.11346 | -1.03154 | -0.64874 | -0.46179 | -1.2076  | -0.94636 | -1.12832 | -1.88982 | -1.11784 | -0.73402 |          |
| Q8N0Z3 | Spindle anc  | SPICE1 CCC  | -3.57289 | -3.48699 | NA       | NA       | -3.59991 | -4.58496 | -3.43911 | -2.93289 | -3.45003 | -2.51584 |          |
| Q8N0Z8 | tRNA pseuc   | PUSL1       | -2.46855 | -1.7632  | -0.78319 | -1.06413 | -1.07635 | -1.52083 | -3.09516 | -1.37737 | -0.98126 | -0.8893  |          |
| Q8N103 | T-cell activ | TAGAP TAC   | -2.66778 | -2.39214 | -0.77538 | -1.50663 | -0.76702 | -1.38287 | -0.93569 | -1.09822 | -2.40163 | -2.31779 |          |
| Q8N108 | Mesoderm     | MIER1 KIA   | -0.52826 | -0.56655 | 0.03859  | -0.32315 | -0.22679 | -0.11431 | -0.22061 | 0.168011 | -0.04583 | 0.208948 |          |
| Q8N122 | Regulatory   | RPTOR KIA   | -1.34844 | -0.66522 | -0.61756 | -0.74153 | -0.80556 | -0.79922 | -0.53368 | -1.42114 | -0.68107 | -0.64292 |          |
| Q8N137 | Centrobini   | (CNTROB LII | -0.5285  | -0.35646 | -0.16944 | -0.51457 | -0.47063 | -0.59318 | -0.37137 | -0.28379 | -0.29739 | -0.26127 |          |
| Q8N163 | Cell cycle a | CCAR2 DBC   | -0.26546 | -0.47069 | -0.24598 | -0.42206 | -0.03286 | 0.010888 | -0.26303 | -0.42269 | -0.34796 | -0.27263 |          |
| Q8N183 | NADH dehy    | NDUFAF2 N   | 0.076726 | 0.148099 | 0.216811 | 0.252542 | 0.43351  | 0.540568 | 0.26559  | 0.546282 | 0.770518 | 0.490476 |          |
| Q8N1B4 | Vacuolar pi  | VPS52 SACI  | -1.44741 | -0.95556 | -0.43709 | -0.57883 | -0.3537  | -0.42456 | -0.74838 | -0.78489 | -0.53708 | -0.5268  |          |
| Q8N1F7 | Nuclear po   | NUP93 KIA   | -0.53944 | -0.44662 | -0.39183 | -0.47917 | -0.56649 | -0.29456 | -0.36556 | -0.25618 | -0.27439 | -0.62361 |          |
| Q8N1F8 | Serine/thre  | STK11IP KI  | -3.5025  | -3.57719 | -3.44392 | -3.32193 | -2.55552 | -1.77761 | -3.38466 | -3.39232 | -3.04793 | -3.39453 |          |
| Q8N1G0 | Zinc finger  | ZNF687 KIA  | -1.08746 | -0.91667 | -0.98449 | -0.4361  | -0.51245 | -0.66069 | -0.9301  | -0.80735 | -0.45003 | -0.37718 |          |
| Q8N1G2 | Cap-specifi  | CMTR1 FTS   | -0.80735 | -0.20945 | -0.05565 | -0.07731 | -0.23359 | -0.30968 | -0.27537 | 0.056143 | -0.22396 | -0.18886 |          |
| Q8N1G4 | Leucine-ric  | LRRC47 KIA  | 0.064765 | 0.203328 | 0.08827  | 0.317935 | 0.136585 | 0.194011 | 0.244954 | 0.194842 | 0.255336 | 0.324523 |          |
| Q8N1K5 | Protein THI  | THEMIS C6   | -0.10057 | -0.32833 | 0.272202 | 0.350501 | -0.12646 | -0.25328 | 0.059094 | 0.166088 | -0.11502 | -0.23265 |          |
| Q8N201 | Integrator   | (INTS1 KIAA | -2.08769 | -1.33154 | -1.51111 | -1.67611 | -2.71914 | -1.95802 | -1.83577 | -1.70855 | -1.76553 | -1.77576 |          |
| Q8N257 | Histone H2   | H2BU1 HIS   | -1.77881 | -0.83334 | -1.14619 | -0.72968 | -1.0311  | -0.85603 | 0.350534 | 0.297602 | -0.37301 | -0.25587 |          |
| Q8N2K0 | Lysophospl   | ABHD12 C2   | -0.13993 | -0.7112  | -0.14336 | -0.40255 | -0.22487 | -0.16175 | -0.41163 | -0.27684 | -0.92647 | -1.54137 |          |
| Q8N335 | Glycerol-3-  | GPD1L KIA   | -0.49394 | 0.176654 | 0.105585 | -0.24646 | -0.1015  | -0.11477 | 0.339668 | 0.212003 | 0.012373 | -0.13163 |          |
| Q8N357 | Solute carr  | SLC35F6 C2  | -0.8238  | -1.32127 | -1.32483 | -0.55055 | -0.49762 | -0.31849 | -1.14149 | -0.721   | -1.23481 | -1.20458 |          |
| Q8N392 | Rho GTPas    | ARHGAP18    | -0.70499 | -0.57138 | 0.133954 | -0.14505 | 0.058299 | -0.56866 | 0.235488 | -0.12553 | -0.18593 | -0.13441 |          |

|        |                         |          |          |          |          |          |          |          |          |          |          |
|--------|-------------------------|----------|----------|----------|----------|----------|----------|----------|----------|----------|----------|
| Q8N3C0 | Activating s ASCC3 HELI | -0.40296 | -0.08844 | -0.07195 | -0.59756 | -0.25118 | -0.09603 | -0.53222 | -0.50967 | -0.26303 | -0.03585 |
| Q8N3D4 | EH domain EHBP1L1       | -1.13328 | -1.11109 | -0.21102 | -0.48794 | -0.51245 | -0.46697 | -0.83577 | -0.9886  | -0.52316 | -0.65661 |
| Q8N3P4 | Vacuolar pi VPS8 KIAAC  | -4.19438 | -2.34156 | -2.26459 | -3.45317 | -2.64572 | -3.72247 | NA       | NA       | -3.55695 | -3.30433 |
| Q8N3U4 | Cohesin sul STAG2 SA2   | 0.254929 | 0.3266   | -0.07605 | 0.031027 | -0.10806 | 0.19878  | -0.03103 | -0.08854 | 0.218346 | 0.118877 |
| Q8N3X1 | Formin-bin FNBP4 FBP    | -1.05673 | -0.98674 | -0.89237 | -1.20163 | -0.65735 | -0.8331  | -1.1461  | -1.04557 | -0.50628 | -0.59727 |
| Q8N3Z6 | Zinc finger ZCCHC7 HS   | -1.85042 | -2.26459 | -1.72403 | -2.59756 | -1.31451 | -1.91511 | -1.45305 | -1.86876 | -1.97199 | -1.60726 |
| Q8N488 | RING1 and RYBP DEDA     | -3.13993 | -3.24598 | NA       | NA       | NA       | NA       | -3.89162 | -3.88982 | -1.83112 | -3.06333 |
| Q8N4C6 | Ninein (hNi NIN KIAA1E  | -0.05561 | -0.27872 | -1.5202  | -1.68312 | -0.74193 | 0.100264 | -0.73867 | -0.4459  | -0.91058 | -0.90781 |
| Q8N4C8 | Misshapen MINK1 B55     | -0.03063 | 0.155119 | 0.2824   | 0.425973 | 0.194503 | 0.459432 | 0.332124 | 0.275386 | 0.304855 | 0.254898 |
| Q8N4H5 | Mitochond TOMM5 C5      | 1.110807 | 1.170791 | -0.10932 | -0.45317 | -0.51245 | -0.4975  | 0.449163 | -0.38482 | -0.21299 | -0.79414 |
| Q8N4N3 | Kelch-like p KLHL36 C16 | -0.89482 | -0.80346 | -0.73716 | -1       | -0.71508 | -0.48826 | -0.76451 | -0.52291 | -0.31857 | -0.58054 |
| Q8N4P3 | Guanosine- HDDC3 ME     | 0.668091 | 0.823534 | 0.497445 | 0.463703 | 0.905559 | 0.799458 | 0.937037 | 0.765721 | 0.937293 | 0.874753 |
| Q8N4Q1 | Mitochond CHCHD4 M      | -0.52727 | -0.40622 | -0.49272 | -0.81584 | -1.05964 | -0.17913 | -0.64243 | -0.06577 | -0.45472 | -1.01181 |
| Q8N4S0 | Coiled-coil CCDC82 HT   | 0.29548  | 0.437742 | 0.563717 | 0.445169 | 0.522204 | 0.636158 | 0.02032  | 0.028345 | 0.582215 | 0.634237 |
| Q8N4T8 | Carbonyl re CBR4 SDR4   | -3.30986 | -4.83094 | -3.24598 | -3.9386  | NA       | NA       | -3.61599 | -3.80735 | -4.08746 | -4.0268  |
| Q8N554 | Zinc finger ZNF276 CEI  | -0.78705 | -0.86901 | -0.66425 | -0.61783 | -0.16763 | -0.42976 | -0.10901 | -0.15513 | -0.36722 | -0.19289 |
| Q8N573 | Oxidation r OXR1 Nbla   | -0.79717 | -0.55625 | -0.92405 | -0.56937 | -0.56217 | -0.50894 | -0.47781 | -0.53596 | -0.58021 | -0.70165 |
| Q8N584 | Tetratricop TTC39C C18  | 0.856726 | 0.944352 | 0.419903 | 0.601593 | 0.31895  | 0.451461 | 0.356304 | 0.162271 | 0.164677 | 0.521637 |
| Q8N5A5 | Zinc finger ZGPAT GPA   | -0.94081 | -0.44546 | -0.33736 | -0.60607 | -0.4861  | -0.50574 | -0.50367 | -0.29109 | -0.21383 | -0.39752 |
| Q8N5F7 | NF-kappa-E NKAP         | -1.31849 | -1.40407 | -1.31153 | -1.4973  | -1.12105 | -1.12421 | -0.99592 | -1.09531 | -0.34998 | -0.64691 |
| Q8N5J2 | Ubiquitin c MINDY1 FA   | -1.16089 | -1.0342  | -1.57069 | -1.70888 | -1.05718 | -0.86562 | -1.01778 | -1.09744 | -0.92234 | -0.58094 |
| Q8N5K1 | CDGSH iror CISD2 CDG:   | -1.02198 | -1.06821 | -1.45457 | -1.35364 | -1.12418 | -1.75899 | -1.22906 | -0.82265 | -1.848   | -0.97369 |
| Q8N5N7 | 39S ribosor MRPL50      | -1.43539 | -0.78991 | -1.23676 | -0.89129 | -1.57755 | -1.33015 | -0.95964 | -1.23581 | -1.21299 | -1.12956 |
| Q8N5P1 | Zinc finger ZC3H8 ZC3   | -2.94062 | -1.64874 | -1.5427  | -1.69574 | -2.51245 | -1.65208 | -1.52484 | -1.78746 | -2.06756 | -1.45391 |
| Q8N5V2 | Ephexin-1 ( NGEF        | 1.110807 | 1.334352 | 1.575836 | 1.294061 | 1.4902   | 1.703799 | 1.562621 | 1.6282   | 1.830075 | 1.676411 |
| Q8N684 | Cleavage ai CPSF7       | -0.74797 | -0.65425 | -0.88522 | -1.06628 | -0.81321 | -0.96446 | -0.95095 | -0.92826 | -0.83232 | -0.73903 |
| Q8N6F7 | Germinal c GCSAM GA     | -1.19438 | -1.18265 | -0.96914 | -0.87971 | -1.14048 | -1.33015 | -1.42531 | -1.03477 | -1.57089 | -0.87299 |
| Q8N6H7 | ADP-ribosy ARFGAP2 Z    | -0.72135 | 0.157253 | 0.092179 | 0.2265   | -0.5609  | -0.6749  | -0.89532 | -0.92291 | -0.92511 | -0.90567 |
| Q8N6M0 | Deubiquitir OTUD6B DI   | 0.160465 | 0.310969 | 0.422815 | 0.63429  | 0.67155  | 0.427281 | 0.282513 | 0.35811  | 0.848521 | 0.903937 |
| Q8N6N3 | UPF0690 p C1orf52 BA    | 1.302399 | 1.450186 | 1.019365 | 1.003133 | 1.029444 | 0.84739  | 0.961111 | 1.072569 | 1.228441 | 1.275153 |
| Q8N6R0 | eEF1A lysin EEF1AKNM    | -1.95388 | -1.17142 | -1.21126 | -1.20648 | -2.18307 | -1.60365 | -1.26362 | -1.34359 | -1.48394 | -1.12959 |
| Q8N6S5 | ADP-ribosy ARL6IP6 PF   | -1.579   | -1.24785 | -0.91705 | -1.53081 | -1.53753 | -1.1681  | -1.38504 | -1.11183 | -1.4137  | -1.17568 |
| Q8N6T3 | ADP-ribosy ARFGAP1 A    | -0.14716 | -0.13024 | -0.00782 | -0.27563 | -0.23359 | -0.14958 | -0.34514 | -0.69188 | -0.3932  | -0.08194 |

|        |                         |          |          |          |          |          |          |          |          |          |          |
|--------|-------------------------|----------|----------|----------|----------|----------|----------|----------|----------|----------|----------|
| Q8N7H5 | RNA polym PAF1 PD2      | -0.07464 | -0.05374 | 0.357362 | 0.193429 | 0.194005 | 0.021695 | 0.098853 | 0.050626 | 0.293359 | 0.272291 |
| Q8N806 | Putative E3 UBR7 C14o   | -0.37505 | -0.33638 | -0.18996 | -0.18882 | -0.35771 | -0.31179 | -0.21802 | -0.35449 | -0.10804 | 0.00705  |
| Q8N8A2 | Serine/thre ANKRD44     | 0.4975   | 0.649549 | 0.648528 | 0.88243  | 0.737666 | 0.84948  | 0.684604 | 0.58612  | 0.409117 | 0.347768 |
| Q8N8A6 | ATP-depen DDX51         | 0.047697 | 0.603045 | 0.422815 | 0.198904 | 0.45537  | 0.584963 | 0.364274 | 0.265894 | 0.584963 | 0.605468 |
| Q8N960 | Centrosom CEP120 CCl    | -3.30986 | -1.7632  | -1.93147 | -1.13124 | -3.14048 | -1.72247 | -2.20881 | -2.04654 | -2.30319 | -1.71937 |
| Q8N9E0 | Protein FAI FAM133A     | -2.02458 | -1.60226 | -0.90059 | -1.37049 | -0.69754 | -0.56489 | -1.24016 | -1.01075 | -1.04306 | -1.29469 |
| Q8N9N8 | Probable R EIF1AD       | 0.549153 | 0.75089  | 0.768565 | 0.530907 | 0.80743  | 0.769633 | 0.750426 | 0.59807  | 1.303149 | 1.344423 |
| Q8N9T8 | Protein KRI KRI1        | -0.67238 | -0.65618 | -0.27437 | -0.36062 | 0.126401 | -0.03561 | 0.172992 | 0.032776 | -0.05399 | -0.20261 |
| Q8NAV1 | Pre-mRNA- PRPF38A       | -0.12003 | -0.38672 | -0.03553 | 0.13179  | -0.26006 | 0.021695 | -0.19118 | -0.22239 | -0.14365 | 0.202019 |
| Q8NB16 | Mixed linez MLKL        | 0.049649 | -0.14757 | 0.069164 | 0.047989 | -0.28137 | -0.00491 | -0.38689 | -0.26303 | -0.27963 | -0.18517 |
| Q8NB37 | Glutamine GATD1 PDI     | -1.22448 | -0.64114 | -0.72611 | -0.85497 | -0.85249 | -0.7614  | -0.92809 | -0.90368 | -0.64084 | -0.54506 |
| Q8NB90 | ATPase fan SPATA5 AFi   | -2.36452 | -2.25918 | -2.50901 | -1.87533 | -3.42999 | -3.45943 | -3.18536 | -2.15987 | -2.30319 | -2.48307 |
| Q8NBJ5 | Procollagen COLGALT1    | -2.04525 | -2.07419 | -2.41562 | -2.33709 | -2.23425 | -2.46037 | -1.87753 | -1.73575 | -1.20211 | -0.8893  |
| Q8NBJ7 | Inactive C-z SUMF2 PSE  | -0.03625 | 0.048643 | -0.15131 | -0.06877 | 0.039058 | 0.547036 | 0.360449 | 0.35647  | -0.47899 | -0.83374 |
| Q8NBL1 | Protein O-g POGLUT1 C   | -1.04132 | -1.15777 | -1.41253 | -1.22347 | -1.80291 | -1.32962 | -1.34573 | -2.04634 | -1.92311 | -1.74072 |
| Q8NBN7 | Retinol def RDH13 SDF   | -1.91754 | -1.25526 | -1.30256 | -1.05107 | -1.33313 | -1.30293 | -1.83577 | -3.22239 | -1.14886 | -0.89752 |
| Q8NBQ5 | Estradiol 1: HSD17B11   | 0.36114  | 0.391229 | -0.01745 | -0.06356 | -0.02302 | -0.03885 | 0.024129 | 0.110881 | -0.13762 | -0.17681 |
| Q8NBS9 | Thioredoxin TXNDC5 TL   | 0.725946 | 0.874381 | 0.152642 | -0.04191 | -0.07126 | -0.07847 | -0.12146 | -0.23954 | 0.125203 | 0.113678 |
| Q8NBU5 | ATPase fan ATAD1 FNF    | -1.60942 | -1.52015 | -1.87317 | -1.54171 | -1.7956  | -1.55775 | -1.74032 | -1.39044 | -1.86191 | -1.87299 |
| Q8NBX0 | Saccharopi SCCPDH CC    | 1.317071 | 1.081487 | 0.994139 | 1.046294 | 1.24871  | 1.485036 | 1.596851 | 1.241889 | 1.335069 | 1.402816 |
| Q8NC44 | Reticuloph: RETREG2 C   | -1.47373 | -1.73841 | -0.65459 | -0.87579 | 0.005955 | -0.15694 | -1.15377 | -0.96941 | -0.77341 | -0.76354 |
| Q8NC51 | Plasminoge SERBP1 PA    | 0.934121 | 0.822576 | 0.27919  | 0.13179  | 0.432658 | 0.455452 | 0.307532 | 0.326501 | 0.693897 | 0.93436  |
| Q8NCA5 | Protein FAI FAM98A      | -1.78629 | -1.53138 | -1.87317 | -1.86821 | -1.47063 | -1.52083 | -1.34514 | -1.80735 | -1.67243 | -1.12956 |
| Q8NCG7 | Diacylglyce DAGLB       | -0.22239 | -0.12199 | -0.39696 | -0.04459 | -0.09212 | 0        | -0.22069 | -0.69188 | -0.21299 | -0.38873 |
| Q8NCN4 | E3 ubiquitin RNF169 KI/ | -1.78508 | -2.1636  | -1.56782 | -1.41156 | 0.058299 | -0.21785 | -1.70901 | -1.58886 | -1.58302 | -1.44909 |
| Q8NCN5 | Pyruvate di PDPR KIAA:  | -1.20297 | -0.51214 | -0.48207 | -1.3274  | -1.2781  | -0.42169 | -0.42388 | -0.36047 | -0.61243 | -0.60949 |
| Q8NCW5 | NAD(P)H-h NAXE AIBP     | -0.57289 | -0.54839 | -0.39183 | -0.66558 | -0.53382 | -0.37906 | -0.52484 | -0.58496 | -0.37474 | -0.12473 |
| Q8NCX0 | Coiled-coil CCDC150     | 1.413521 | 1.478447 | 1.674412 | 1.120294 | 1.516431 | 1.624491 | 1.465928 | 1.492362 | 1.594361 | 1.155098 |
| Q8ND04 | Protein SM SMG8 ABC:    | -1.77502 | -2.1531  | -1.32566 | -1.75104 | -1.58097 | -1.62953 | -1.7723  | -1.76756 | -1.25422 | -1.54356 |
| Q8ND24 | RING finger RNF214      | -1.26553 | -1.46964 | -1.40283 | -1.53081 | -1.75623 | -2.23474 | -2.11208 | -2.24297 | -1.46122 | -1.48222 |
| Q8ND56 | Protein LSM LSM14A C1   | 0.993925 | 0.655971 | 1.675633 | 1.425973 | 1.652753 | 1.538689 | 1.458501 | 1.35811  | 1.66594  | 1.564161 |
| Q8ND71 | GTPase IM: GIMAP8 IA    | 0.057029 | 0.254843 | 0.48845  | 0.527334 | 0.626031 | 0.894994 | 0.513226 | 0.510801 | 0.000955 | 0.065712 |
| Q8NDH3 | Probable ai NPEPL1 KIA  | 0.029995 | -0.03154 | 0.468619 | 0.512062 | 0.270452 | 0.562936 | 0.299241 | 0.152003 | 0.463711 | 0.382591 |

|        |                                  |          |          |          |          |          |          |          |          |          |          |
|--------|----------------------------------|----------|----------|----------|----------|----------|----------|----------|----------|----------|----------|
| Q8NDT2 | Putative R <sup>h</sup> RBM15B O | -0.16011 | -0.01963 | -1.89346 | -1.98004 | -1.46127 | -2.03547 | -1.35149 | -2.11332 | -4.08746 | -3.54137 |
| Q8NDX1 | PH and SEC PSD4 EFA6I            | -1.00091 | -0.82739 | -0.8273  | -1.02972 | -0.89927 | -0.8267  | -1.06833 | -1.30172 | -1.22438 | -0.89209 |
| Q8NDX5 | Polyhomec PHC3 EDR3              | -1.63771 | -1.49481 | -0.60999 | -0.57373 | -1.09684 | -0.50265 | 1.040358 | 0.846087 | -1.08524 | -0.41517 |
| Q8NE71 | ATP-bindin ABCF1 ABC             | -0.20832 | 0.481302 | 0.352274 | 0.294263 | 0.177303 | 0.272061 | 0.237033 | 0.199098 | 0.328606 | 0.435907 |
| Q8NE86 | Calcium un MCU C10oI             | 0.383248 | 0.22173  | -0.52191 | -0.01775 | -0.61883 | -0.4813  | -0.2402  | -0.70155 | -1.03333 | -1.2649  |
| Q8NEB9 | Phosphatid PIK3C3 VPS            | -2.49964 | -2.93155 | -1.01568 | -1.71621 | -0.83173 | -0.65208 | -1.30666 | -1.61973 | -2.70443 | -2.71212 |
| Q8NEJ9 | Neuroguidi NGDN C14c             | -1.46855 | -1.2276  | -0.99222 | -1.06413 | -1.14048 | -1.28951 | -1.43911 | -1.10692 | -1.4119  | -0.84888 |
| Q8NEY8 | Periphilin-1 PPHLN1 HS           | -0.18057 | 0.357362 | 0.246696 | 0.589138 | 0.726517 | 0.5025   | -1.6705  | -1.46264 | 0.397248 | 0.515458 |
| Q8NEZ2 | Vacuolar pi VPS37A HC            | 0.552265 | 0.718917 | 0.88013  | 0.95541  | 0.81794  | 0.797956 | 0.788227 | 0.82362  | 0.719892 | 0.730757 |
| Q8NEZ4 | Histone-lys KMT2C HAI            | -2.36312 | -2.55793 | -1.1305  | -0.7794  | -2.04174 | -2.33179 | -2.25298 | -2.29248 | -1.82607 | -2.26471 |
| Q8NEZ5 | F-box only FBXO22 FB             | 0.431612 | 0.468619 | 0.049819 | -0.05759 | 0.207442 | 0.105353 | 0.204745 | 0.131245 | 0.121991 | 0.334266 |
| Q8NF37 | Lysophospl LPCAT1 AY             | -0.679   | -0.37278 | -2.0079  | -0.81717 | -1.6476  | -0.94188 | -0.20582 | -0.80861 | -1.43108 | -1.16393 |
| Q8NF50 | Dedicator c DOCK8                | -0.53153 | -0.48017 | -0.07604 | -0.26061 | -0.20551 | -0.24028 | -0.30523 | -0.27966 | -0.13848 | -0.11376 |
| Q8NF91 | Nesprin-1 ( SYNE1 C6oI           | -0.37912 | -0.61849 | -0.99893 | -1.26178 | -0.68105 | -0.88452 | -1.0681  | -0.84286 | -1.20247 | -1.33279 |
| Q8NF99 | Zinc finger ZNF397 ZN            | 1.009064 | 1.529314 | 0.819558 | 0.546827 | 0.977516 | 1.056268 | 1.077195 | 0.384664 | 0.556393 | 0.439174 |
| Q8NFC6 | Biorientatic BOD1L1 BC           | -0.53727 | -0.50801 | -0.60064 | -0.64916 | -0.29538 | -0.59318 | -0.59781 | -0.77007 | -0.55142 | -0.30281 |
| Q8NFD5 | AT-rich inte ARID1B BA           | -0.07801 | 0.087359 | 0.242062 | 0.256184 | 0.305473 | 0.02626  | 0.159526 | 0.302901 | 0.4832   | 0.587008 |
| Q8NFH3 | Nucleopori NUP43                 | -0.91373 | -0.66884 | -1.05756 | -0.83817 | -0.46004 | -0.86576 | -1.24601 | -1.06919 | -0.6905  | -0.54268 |
| Q8NFH4 | Nucleopori NUP37                 | -0.46855 | -0.12624 | -0.7632  | -1.56009 | -1.14048 | -1.42968 | -0.56212 | -0.71989 | -1.4892  | -0.96502 |
| Q8NFH5 | Nucleopori NUP35 MP              | -1.10942 | -0.8868  | -1.17975 | -0.9284  | -0.97476 | -1.09057 | -1.27389 | -1.26592 | -0.93743 | -1.09887 |
| Q8NFI3 | Cytosolic e ENGASE               | 0.057394 | 0.183871 | -0.26011 | -0.30909 | -0.07989 | 0.317889 | -0.17846 | -0.03684 | 0.464035 | 0.466995 |
| Q8NFJ8 | Class E basi BHLHE22 B           | -0.28749 | 0.072245 | -0.34651 | -0.85681 | -0.19903 | -0.08439 | -0.24473 | -0.53434 | -0.15936 | 0.0859   |
| Q8NFU3 | Thiosulfate TSTD1 KAT            | 1.163174 | 1.358883 | 0.206711 | 0.411898 | 1.388772 | 0.804229 | 1.175598 | 1.146841 | 0.91504  | 0.948188 |
| Q8NFW8 | N-acylneur CMAS                  | 0.053549 | 0.23349  | 0.12683  | 0.091148 | 0.220266 | -0.02203 | 0.278301 | 0.222392 | 0.301033 | -0.04495 |
| Q8NG11 | Tetraspanii TSPAN14 T            | -1.25096 | -1.02359 | -1.15634 | -0.7794  | -0.79256 | -0.77761 | -1.22069 | -1.55102 | -0.97199 | -0.87299 |
| Q8NHG8 | E3 ubiquitii ZNRF2 RNF           | -0.13327 | -0.19153 | -0.15634 | -0.59756 | -0.53382 | -0.54455 | -0.5697  | -0.36995 | -0.88235 | -0.59384 |
| Q8NHQ9 | ATP-depen DDX55 KIA              | -1.10516 | -0.57331 | -0.41201 | -0.42609 | -0.26724 | -0.23254 | -0.53849 | -0.81315 | -0.18092 | 0.072889 |
| Q8NHV1 | GTPase IM, GIMAP7 IA             | -0.06193 | -0.10164 | -0.23922 | -0.24187 | -0.04551 | -0.14434 | -0.04183 | 0.071818 | -0.02511 | -0.33406 |
| Q8NHV4 | Protein NEI NEDD1                | -1.42286 | -1.25602 | -1.04388 | -0.94186 | -1.53014 | -1.51811 | -1.97603 | -2.04612 | -1.94711 | -1.55092 |
| Q8NHZ8 | Anaphase- $\gamma$ CDC26 AN/     | -0.24377 | -0.01568 | -0.63656 | -0.72655 | -0.24236 | -0.79647 | -0.69661 | -0.85834 | -0.60634 | -0.37145 |
| Q8NI08 | Nuclear rec NCOA7 ER/            | -2.57289 | -1.75391 | -1.90004 | -2.4693  | -2.55552 | -1.60145 | -1.89162 | -1.78746 | -2.33621 | -1.84093 |
| Q8NI27 | THO compl THOC2 CXc              | -0.86139 | -0.43335 | -0.79667 | -1.23078 | -0.41546 | -0.44684 | -0.4957  | -0.75811 | -0.67996 | -0.41799 |
| Q8NI36 | WD repeat WDR36                  | -1.08185 | -0.73993 | -0.80619 | -0.8404  | -0.45783 | -0.33524 | -0.48945 | -0.20601 | -0.15234 | -0.34391 |

|        |                        |          |          |          |          |          |          |          |          |          |          |
|--------|------------------------|----------|----------|----------|----------|----------|----------|----------|----------|----------|----------|
| Q8NI60 | Atypical kir COQ8A AD  | -2.64689 | -2.00782 | -1.87317 | -3.52356 | -3.59991 | -1.93587 | -1.71329 | -2.80735 | -1.58496 | -2.2402  |
| Q8TAD8 | Smad nucle SNIP1       | -1.12974 | -0.77135 | -0.83086 | -0.6523  | -0.79759 | -0.6526  | -0.94581 | -1.00767 | -1.23021 | -0.73076 |
| Q8TAE8 | Growth arr GADD45GII   | -3.89482 | -2.5541  | -2.28345 | -3.38606 | -3.07635 | -3.18641 | -3.23266 | -3.58496 | -3.5025  | -3.13927 |
| Q8TAF3 | WD repeat WDR48 KIA    | -0.90613 | -0.45457 | -1.38163 | -0.90298 | -0.56649 | -0.36491 | -0.60817 | -0.55102 | -0.83954 | -0.7414  |
| Q8TAK5 | GA-binding GABPB2      | -0.9523  | -0.87317 | -0.5541  | -0.26053 | -0.7051  | -0.2962  | -0.42531 | -0.24257 | -0.45649 | -0.18886 |
| Q8TAQ2 | SWI/SNF cc SMARCC2 E   | -0.05561 | -0.13478 | 0.405256 | -0.05107 | 0.161638 | -0.26303 | -0.03626 | 0.110183 | 0.009399 | 0.0649   |
| Q8TAT6 | Nuclear pro NPLOC4 KI  | 0.431612 | 0.490986 | 0.534708 | 0.580775 | 0.45537  | 0.555519 | 0.395724 | 0.526546 | 0.961781 | 0.995568 |
| Q8TB03 | Uncharacte CXorf38     | -2.61896 | -1.60746 | -1.517   | -1.32227 | -0.94425 | -1.36534 | -1.04156 | -1.60078 | -2.11209 | -1.90588 |
| Q8TB24 | Ras and Ra RIN3        | -0.1087  | 0.069617 | -0.17405 | -0.15095 | 0.204986 | -0.15867 | -0.01827 | 0.03237  | 0.318725 | -0.05219 |
| Q8TB37 | Iron-sulfur NUBPL C14  | -0.56168 | -0.52717 | -0.34524 | -0.46961 | -0.45938 | -0.08011 | -0.37047 | -0.27925 | -0.30254 | -0.54379 |
| Q8TB72 | Pumilio hom PUM2 KIAA  | -0.25952 | -0.4086  | 0.79111  | 0.982101 | 0.963671 | 0.756702 | 1.084938 | 1.109075 | 1.078493 | 0.977089 |
| Q8TBA6 | Golgin subf GOLGA5 RE  | -0.96452 | -0.86297 | -0.71764 | -0.16995 | -0.54251 | -0.64739 | -0.41362 | -1.30472 | -0.87953 | -0.82974 |
| Q8TBC4 | NEDD8-act UBA3 UBE1    | -0.15335 | -0.08017 | -0.24598 | -0.45317 | -0.29613 | -0.57679 | -0.36476 | -0.41504 | -0.24616 | -0.0726  |
| Q8TBC5 | Zinc finger ZSCAN18 Z  | -0.65641 | -0.48699 | -0.47069 | -0.14505 | -0.10007 | -0.02203 | -0.22069 | -0.42269 | 0.327575 | 0.399465 |
| Q8TBF2 | Prostamide PRXL2B C1c  | 0.528937 | 0.635393 | 0.065636 | -0.36814 | 3.83E-05 | 0.132731 | 0.108595 | 0.304586 | 0.47101  | 0.174946 |
| Q8TBX8 | Phosphatid PIP4K2C PII | 0.750642 | 1.02167  | 1.074098 | 0.780219 | 1.033082 | 1.194011 | 1.206641 | 1.233543 | 1.063508 | 0.986396 |
| Q8TC05 | Nuclear pro MDM1       | 0.705095 | 0.58756  | 0.737745 | 0.681987 | 1.036712 | 1.021695 | 0.66458  | 1.112832 | 1.384664 | 1.396106 |
| Q8TC07 | TBC1 domc TBC1D15      | -2.82871 | -1.96628 | -1.96153 | -1.73697 | -1.75951 | -1.71284 | -2.11181 | -1.67494 | -1.92461 | -1.63448 |
| Q8TC12 | Retinol det RDH11 ARS  | -2.03684 | -2.03953 | -1.7112  | -0.41086 | -1.81855 | -1.74061 | -2.09516 | -0.94386 | -2.64268 | -1.73402 |
| Q8TC90 | Coiled-coil CCER1 C12c | -1.45187 | -0.91667 | -0.33662 | 0.209792 | -0.22487 | -0.52869 | -0.60039 | -0.71049 | -0.5639  | -0.1788  |
| Q8TCA0 | Leucine-ric LRRC20 UN  | -1.18057 | -1.02359 | -1.50901 | -1.8011  | -0.88567 | -1.72247 | -1.08427 | -1.6735  | -0.81444 | -1.1788  |
| Q8TCC3 | 39S ribosor MRPL30 M   | -3.25096 | -2.64874 | -3.24598 | -3.67557 | -3.89947 | -3.04439 | -2.18536 | -3.58496 | -3.00946 | -3.30433 |
| Q8TCD5 | 5'(3')-deox NT5C DNT1  | 1.247289 | 1.36192  | 0.133954 | 0.209792 | 0.731004 | 0.23173  | 0.588369 | 0.691605 | 0.490805 | 0.964155 |
| Q8TCF1 | AN1-type z ZFAND1      | -0.20832 | -0.06378 | 0.057333 | -0.05759 | -0.09212 | 0.273018 | -0.07346 | -0.34792 | 0.446516 | 0.114796 |
| Q8TCJ2 | Dolichyl-di STT3B SIMI | -0.4136  | -0.62935 | -0.84805 | -0.81316 | -1.42583 | -0.97526 | -1.18115 | -0.90814 | -0.84516 | -0.72591 |
| Q8TCS8 | Polyribonu PNPT1 PNP   | -0.77588 | -0.78658 | -0.50171 | -0.49402 | -0.31451 | -0.31638 | -0.3646  | -0.21938 | -0.23742 | -0.35797 |
| Q8TCT9 | Minor histc HM13 H13   | 0.063387 | -0.03678 | -1.95743 | -1.62423 | -1.96388 | -0.82369 | -0.15677 | -0.60052 | -1.4107  | -1.99584 |
| Q8TCU6 | Phosphatid PREX1 KIAA  | -2.89482 | -2.00782 | -1.63656 | -1.82312 | -1.66918 | -1.56866 | -2.60583 | -1.95491 | -2.30319 | -2.31568 |
| Q8TD16 | Protein bic BICD2 KIAA | -0.54143 | -0.41244 | -1.24742 | -1.03356 | -0.40648 | -0.42833 | -0.49433 | -0.53469 | -1.36042 | -1.56439 |
| Q8TD19 | Serine/thre NEK9 KIAA: | 0.28235  | 0.295202 | 0.752581 | 0.611327 | 0.696848 | 0.693623 | 0.554089 | 0.704856 | 1.120271 | 0.920306 |
| Q8TD55 | Pleckstrin f PLEKHO2 P | -0.62234 | -0.6771  | 0.093597 | -0.07946 | -0.6843  | 0.096455 | -0.05568 | -0.02769 | -0.18326 | -0.35496 |
| Q8TDB6 | E3 ubiquitii DTX3L BBA | -0.13327 | -0.08844 | 0.172522 | 0.160134 | -0.05302 | -0.0617  | 0.186878 | 0.13357  | 0.284629 | 0.095162 |
| Q8TDD1 | ATP-depen DDX54        | -1.72489 | -1.69849 | -2.34156 | -2.81177 | -2.51245 | -1.89465 | -2.72311 | -1.56789 | -2.06756 | -2.32636 |



|        |                          |          |          |          |          |          |          |          |          |          |          |
|--------|--------------------------|----------|----------|----------|----------|----------|----------|----------|----------|----------|----------|
| Q8TDH9 | Biogenesis BLOC1S5 N     | -1.48214 | -1.58701 | 0.256521 | 0.204358 | 1.076044 | 0.813587 | -1.12976 | -1.44896 | -1.37262 | -1.6692  |
| Q8TDJ6 | DmX-like p DMXL2 KIA     | -0.06827 | 0.023207 | 0.179425 | 0.120294 | 0.079567 | 0.31755  | 0.274077 | 0.375867 | 0.250407 | 0.435907 |
| Q8TDN6 | Ribosome l BRIX1 BRIX    | 0.065184 | 0.91983  | 1.112475 | 1.57447  | 0.895942 | 1.517848 | 0.730813 | 1.008562 | 1.06454  | 0.831181 |
| Q8TDP1 | Ribonuclea RNASEH2C      | -4.08746 | -2.30256 | -2.44392 | -3.03814 | NA       | NA       | -2.89162 | -2.76783 | -3.25739 | -3.0268  |
| Q8TDX7 | Serine/thre NEK7         | -1.21168 | -0.95236 | -0.78176 | -0.66292 | -0.27555 | -0.98914 | -0.87668 | -0.85693 | -0.97075 | -0.56065 |
| Q8TDZ2 | [F-actin]-m MICAL1 MI    | -0.69125 | -0.24046 | -0.50072 | -0.47292 | -0.77153 | -0.44821 | -0.58496 | -0.71989 | -0.38544 | -0.39186 |
| Q8TE02 | Elongator c ELP5 C17or   | -0.61869 | -0.5427  | -0.70483 | -0.23078 | -0.07635 | -0.40054 | -0.6477  | -0.48543 | -0.26303 | -0.00888 |
| Q8TE77 | Protein pho SSH3 SSH3I   | -0.90743 | -0.68536 | -1.11331 | -0.96565 | -1.86002 | -0.91144 | -0.9672  | -0.86796 | -1.09266 | -0.99764 |
| Q8TEA8 | D-aminoac DTD1 C20o      | 0.299939 | 0        | -0.15634 | 0.67021  | 0.609541 | -0.05004 | 0.411195 | 0.490326 | 0.13493  | 0.287896 |
| Q8TEB1 | DDB1- and DCAF11 WI      | -0.95073 | -0.94799 | -0.71415 | -0.94051 | -1.26724 | -0.84693 | -0.81276 | -0.8511  | -0.95147 | -1.00324 |
| Q8TEM1 | Nuclear po NUP210 KI     | 0.355603 | 0.295167 | -0.30026 | -0.05433 | -0.64572 | -0.22422 | 0.122543 | -0.14674 | -0.51592 | -0.58718 |
| Q8TEQ6 | Gem-assoc GEMIN5         | -0.70499 | -0.83789 | -0.89476 | -0.60709 | -0.74193 | -0.38618 | -1.01396 | -0.87561 | -0.68753 | -0.63448 |
| Q8TEQ8 | GPI ethano PIGO UNQ6     | -2.85042 | -1.44392 | -1.13906 | -0.26053 | -2.79256 | -2.26303 | -1.60039 | -3.16993 | -1.5025  | -1.60726 |
| Q8TEU7 | Rap guanin RAPGEF6 P     | -1.15335 | -1.20945 | -0.48699 | -0.67557 | -0.77973 | -0.55254 | -0.50293 | -0.56789 | -0.29739 | -0.1788  |
| Q8TEW0 | Partitioning PARD3 PAR   | -0.82873 | -0.41244 | 0.108863 | -0.26053 | 0.043943 | -0.11366 | -0.3322  | 0.056143 | -0.10257 | -0.06333 |
| Q8TEX9 | Importin-4 IPO4 IMP4I    | 0.13553  | 0.190187 | -0.11791 | -0.35044 | -0.76304 | -0.75288 | -0.43122 | -0.39514 | -0.47083 | -0.2268  |
| Q8TF01 | Arginine/se PNISR C6or   | 0.431612 | 0.675633 | 0.88013  | 0.716752 | 0.973734 | 0.759737 | 0.641808 | 0.874469 | 1.089126 | 1.396106 |
| Q8TF05 | Serine/thre PPP4R1 ME    | -0.84964 | -0.64812 | -0.66221 | -1.07689 | -1.22815 | -1.00127 | -1.79578 | -1.00104 | -0.85527 | -0.95913 |
| Q8TF42 | Ubiquitin-a UBASH3B K    | -1.01217 | -0.78991 | -0.66102 | -0.55087 | -0.69302 | -0.26961 | -0.44606 | -1.18286 | -0.95361 | -0.84093 |
| Q8TF46 | DIS3-like e) DIS3L DIS3I | -2.53727 | -3.24598 | -1.93147 | -1.9386  | -1.53382 | -1.87447 | -2.20881 | -1.78746 | -1.31487 | -1.95641 |
| Q8TF68 | Zinc finger ZNF384 CA    | 1.376305 | 1.377791 | 1.26567  | 1.381095 | 1.497175 | 1.372999 | 1.422555 | 1.163522 | 1.011411 | 0.909891 |
| Q8WTT2 | Nucleolar c NOC3L AD2    | -1.5025  | -2.34156 | -1.17383 | -1.3377  | -0.7051  | -1.0902  | -0.88216 | -0.85834 | -1.58496 | -0.78649 |
| Q8WTW3 | Conserved COG1 KIAA      | -1.87042 | -1.06948 | -0.87786 | -1.23082 | -0.67132 | -0.71814 | -1.18068 | -0.87546 | -1.14719 | -1.06209 |
| Q8WU79 | Stromal mε SMAP2 SM      | 1.009608 | 1.056147 | 1.1004   | 1.008729 | 1.187048 | 1.126339 | 0.928867 | 1.114019 | 1.363482 | 1.442249 |
| Q8WU90 | Zinc finger ZC3H15 DF    | -0.24661 | -0.09373 | 0.034673 | -0.16672 | 0.316755 | -0.01048 | 0.110045 | 0.039528 | 0.044437 | -0.28264 |
| Q8WUA2 | Peptidyl-pr PPIL4        | -0.90613 | -1.1305  | -0.94573 | -1.07634 | -0.74416 | -0.87566 | -1.29406 | -1.02308 | -1.32665 | -1.26127 |
| Q8WUA4 | General tra GTF3C2 KIA   | -0.40537 | -0.4059  | -0.3195  | -0.45964 | -0.32973 | -0.50703 | -0.75898 | -0.83026 | -0.7878  | -0.65033 |
| Q8WUA7 | TBC1 domε TBC1D22A       | -1.76553 | -1.61252 | -2.50391 | -2.58469 | -3.69302 | -1.47454 | -1.96963 | -3.02308 | -2.31645 | -2.61518 |
| Q8WUD4 | Coiled-coil CCDC12       | -0.42556 | -0.15297 | 0.216563 | 0.381166 | 0.060694 | -0.05143 | -0.02126 | 0.122078 | 0.165762 | 0.194501 |
| Q8WUF8 | Cotranscrip FAM172A C    | 0.217805 | 0.1859   | 0.286927 | 0.678115 | 0.345789 | 0.387759 | 0.380636 | 0.352411 | 0.496281 | 0.399995 |
| Q8WUH6 | Transmeml TMEM263        | -1.38702 | -1.29298 | -0.84488 | -0.60709 | -1       | -0.84472 | -0.6477  | -0.56789 | -0.1541  | -0.35437 |
| Q8WUI4 | Histone de HDAC7 HD6     | -1.04933 | -0.97679 | -1.33171 | -1.2909  | -1.35199 | -1.52083 | -1.52484 | -2.07039 | -1.55695 | -1.21945 |
| Q8WUM4 | Programmε PDCD6IP AI     | 0.418065 | 0.3725   | 0.479846 | 0.319417 | 0.405712 | 0.443446 | 0.598541 | 0.344648 | 0.569161 | 0.593786 |

|        |                                   |          |          |          |          |          |          |          |          |          |          |
|--------|-----------------------------------|----------|----------|----------|----------|----------|----------|----------|----------|----------|----------|
| Q8WUQ7 | Cactin (Rer CACTIN C15orf40)      | -0.50148 | -0.60191 | -0.28267 | -0.42393 | -0.26406 | -0.25039 | 0.469347 | 0.528765 | -0.38743 | -0.1335  |
| Q8WUR7 | UPF0235 p C15orf40                | -2.53727 | -2.02359 | -1.52015 | -1.03814 | -2.95606 | -1.37197 | -1.53964 | -1.82753 | -1.3505  | -1.28264 |
| Q8WUW1 | Protein BRI BRK1 C3orf122         | 0.491726 | 0.629653 | -0.3977  | -0.28397 | -0.15726 | -0.32195 | -0.04994 | -0.20825 | -0.30008 | -0.28894 |
| Q8WUX9 | Charged m CHMP7                   | 0.278595 | 0.265428 | -0.02499 | -0.11241 | 0.473133 | 0.436579 | 0.29291  | 0.039346 | 1.035841 | 0.729866 |
| Q8WUZ0 | B-cell CLL/I BCL7C                | -2.0607  | -1.08104 | -1.32376 | -1.69611 | -1.74565 | -2.12832 | -1.60851 | -2.22945 | -1.20984 | -0.65199 |
| Q8WVCO | RNA polym LEO1 RDL                | -1.2949  | -0.91667 | -0.73048 | -0.5787  | -0.72955 | -0.44448 | -0.84493 | -0.50967 | -0.68753 | -0.56737 |
| Q8WVJ2 | NudC domain NUDCD2                | -1.25096 | -1.09675 | -0.94642 | -0.5881  | -0.87199 | -0.74977 | -0.97968 | -1.0115  | -0.78978 | -0.77887 |
| Q8WVK2 | U4/U6.U5 snRNP27                  | 1.341196 | 0.984318 | 1.447329 | 1.385731 | 1.273531 | 1.087463 | 1.415037 | 1.346901 | 1.386468 | 1.365517 |
| Q8WVM7 | Cohesin subunit STAG1 SA1         | 0.501857 | 0.730221 | 0.826978 | 0.800958 | 0.344221 | 0.618979 | 0.649886 | 0.636279 | 0.825762 | 0.742188 |
| Q8WVM8 | Sec1 family SCFD1 C14orf122       | -0.36892 | -0.36647 | -0.08306 | -0.43453 | -0.31451 | -0.34243 | -0.14475 | -0.25566 | -0.4871  | -0.75627 |
| Q8WVT3 | Trafficking TRAPPC12              | -1.02445 | -1.4761  | -1.2276  | -1.17306 | -1.71727 | -1.55254 | -1.5697  | -1.88982 | -1.01898 | -1.09134 |
| Q8WVV9 | Heterogeneous HNRNPLL1            | -0.67565 | -0.5541  | -1.14275 | -1.18735 | -1.04532 | -1.35789 | -1.29981 | -1.89044 | -1.46321 | -1.62087 |
| Q8WVY7 | Ubiquitin-like UBLCP1             | 0.419871 | 0.316876 | 0.543497 | 0.542682 | 0.328357 | 0.484449 | 0.55883  | 0.453601 | 0.736782 | 0.749327 |
| Q8WW12 | PEST protein PCNP                 | 0.032241 | 0.06666  | 0.696412 | 0.765502 | 0.900584 | 0.813587 | 0.761315 | 0.743533 | 1.036758 | 1.039983 |
| Q8WWI1 | LIM domain LMO7 FBX2              | -0.52953 | -0.77489 | -0.35331 | -0.59283 | -0.42004 | -0.09781 | -0.38389 | -0.18939 | 0.2565   | 0.151068 |
| Q8WWM7 | Ataxin-2-like ATXN2L A2           | -0.41596 | -0.31231 | 0.009206 | 0.141504 | 0.021246 | -0.23006 | -0.3452  | -0.12417 | -0.3327  | -0.29008 |
| Q8WWP7 | GTPase family GIMAP1 IIV          | -0.21337 | -0.15727 | -0.12238 | -0.4386  | -0.27722 | 0.163287 | 0.005941 | 0.033583 | -0.4328  | -0.20527 |
| Q8WWQ0 | PH-interacting PHIP DCAF1         | 0.707516 | 0.526714 | 0.811705 | 0.565833 | 0.604658 | 0.573991 | 0.793732 | 0.834789 | 0.899857 | 0.962387 |
| Q8WWV3 | Reticulon-4 RTN4IP1 NI            | -1.74507 | -2.00782 | -1.45457 | -1.26053 | -3.07635 | -1.95693 | -1.60039 | -2.80735 | -2.04793 | -2.19898 |
| Q8WWW0 | Ras associated RASSF5 NO          | 0.244516 | 0.117981 | 0.152701 | 0.272106 | 0.541686 | 0.380143 | 0.202789 | 0.286588 | 0.075724 | 0.533717 |
| Q8WWY3 | U4/U6 small PRPF31 PR1            | 0.597035 | 0.649475 | -0.34156 | -0.23078 | 0.321115 | 0.457409 | 0.303392 | -0.05842 | 0.230452 | -0.33192 |
| Q8WX92 | Negative element NELFB COB        | -0.1004  | -0.06378 | 0.240108 | 0.288936 | 0.270452 | 0.095157 | 0.186878 | 0.157146 | 0.06454  | 0.102483 |
| Q8WXA9 | Splicing regulator SREK1 SFRS1    | 0.045574 | 0.154589 | -0.34744 | -0.48998 | -0.10372 | -0.26045 | -0.40783 | -0.5898  | -0.58787 | -0.39768 |
| Q8WXF1 | Paraspeckle PSPC1 PSP1            | -0.411   | -0.47069 | -0.73291 | -0.48794 | -0.269   | -0.16788 | -0.76451 | -0.60224 | -0.43721 | -0.3431  |
| Q8WXG6 | MAP kinase MADD DEN               | -1.28018 | -0.85577 | -0.47325 | -0.47798 | -0.29092 | -0.45444 | -0.65562 | -0.52421 | -0.48805 | -0.30217 |
| Q8WXH0 | Nesprin-2 (SYNE2 KIAA1022)        | -0.31237 | -0.50337 | -0.27427 | -0.39582 | -0.68853 | -0.56971 | -0.39645 | -0.45372 | -1.07018 | -1.03639 |
| Q8WXI9 | Transcription factor GATAD2B K    | -0.82504 | -0.79238 | -1.19616 | -1.59806 | -0.7974  | -0.44249 | -0.25691 | 0.094182 | -0.95199 | -1.24568 |
| Q8WXX5 | DnaJ homolog DNAJC9               | 0.819082 | 1.109185 | 0.686877 | 0.929714 | 0.693242 | 0.781962 | 0.855841 | 0.981885 | 0.774762 | 0.833462 |
| Q8WYA6 | Beta-catenin CTNBL1 C             | -0.36344 | -0.70483 | -1.08017 | -1.18728 | -1.26304 | -1.14958 | -1.09516 | -1.27684 | -1.24343 | -0.35437 |
| Q8WYH8 | Inhibitor of ING5                 | 0.34337  | 0.296415 | 0.626428 | 0.369624 | 0.754681 | 0.639648 | 0.589765 | 0.538933 | 0.630978 | 0.629214 |
| Q8WYJ6 | Septin-1 (L SEPTIN1 DI)           | 0.441513 | 0.532258 | 0.60561  | 0.895977 | 0.750795 | 0.769387 | 0.380085 | 0.712718 | 0.685127 | 0.634265 |
| Q8WYL5 | Protein phosphatase SSH1 KIAA1022 | -3.13993 | -2.15634 | -1.72403 | -2.0126  | -2.95606 | -3.04439 | -1.9301  | -1.31907 | -1.52947 | -1.59384 |
| Q8WYP5 | Protein ELY AHCTF1 EL             | -0.74507 | -0.77649 | -0.41764 | -1.03332 | -0.81362 | -1.1275  | -0.76729 | -1.14974 | -0.47603 | -0.45998 |

|        |                        |          |          |          |          |          |          |          |          |          |          |
|--------|------------------------|----------|----------|----------|----------|----------|----------|----------|----------|----------|----------|
| Q8WYQ5 | Microproc DGCR8 C22    | -1.69545 | -1.97345 | -1.15954 | -1.58863 | -1.61145 | -1.35039 | -0.96002 | -1.07987 | -0.95141 | -1.19122 |
| Q8WZ82 | Esterase O' OVCA2      | 0.409154 | 0.631008 | 0.134309 | 0.106771 | 0.293324 | 0.095622 | 0.52108  | 0.53409  | 0.027381 | -0.09729 |
| Q8WZA0 | Protein LZI LZIC       | -0.67924 | -0.63864 | -0.52659 | -0.60955 | -0.40905 | -0.46374 | -0.63084 | -0.68268 | -0.42199 | -0.27823 |
| Q92499 | ATP-depen DDX1         | 0.352829 | 0.375509 | 0.42862  | 0.529549 | 0.422455 | 0.31755  | 0.235488 | 0.275386 | 0.540274 | 0.698396 |
| Q92504 | Zinc transp SLC39A7 HI | 1.433857 | 1.284002 | 0.819558 | 1.176878 | 0.59976  | 0.90105  | 1.145851 | 1.144254 | 0.082462 | -0.29888 |
| Q92506 | Estradiol 1' HSD17B8 F | 0.014324 | 0.08948  | 0.425128 | 0.323878 | 0.381851 | 0.454852 | -0.3493  | 0.151257 | 0.57168  | 0.524467 |
| Q92520 | Protein FAI FAM3C ILEI | -2.57289 | -1.93147 | -1.93147 | -1.45317 | -2.64572 | -1.72247 | -1.71329 | -1.97728 | -2.16993 | -2.00888 |
| Q92522 | Histone H1 H1-10 H1F)  | 0.148582 | 0.185415 | 0.265715 | -0.05596 | 0.207442 | 0.192459 | 0.50965  | 0.060188 | 0.040794 | 0.289879 |
| Q92530 | Proteasom PSMF1        | 0.748939 | 0.821646 | 0.676524 | 0.714062 | 0.748109 | 0.728412 | 0.781624 | 0.882308 | 0.779884 | 0.855428 |
| Q92538 | Golgi-speci GBF1 KIAA  | 0.181998 | 0.320368 | 0.714171 | 0.765535 | 0.584963 | 0.169925 | 0.550447 | 0.308122 | 0.15624  | 0.069124 |
| Q92541 | RNA polym RTF1 KIAAC   | -0.31922 | -0.28641 | -0.12667 | -0.33801 | -0.05484 | -0.12679 | -0.56272 | -0.42358 | -0.30521 | -0.21025 |
| Q92552 | 28S ribosor MRPS27 KI  | -1.0747  | -0.58875 | -1.08246 | -1.2505  | -1.77125 | -1.07608 | -0.66626 | -1.37217 | -1.426   | -0.89486 |
| Q92556 | Engulfmen' ELMO1 KIA   | -0.65641 | -0.35147 | 0.193132 | 0.215206 | -0.39046 | 0.33931  | -0.25081 | 0.384664 | 0.456858 | 0.224919 |
| Q92563 | Testican-2 SPOCK2 KI/  | -1.11346 | -0.59474 | -0.5656  | -0.5787  | -0.44004 | -0.57679 | -1.17377 | -0.96605 | -0.72601 | -1.0268  |
| Q92572 | AP-3 comp AP3S1 CLAI   | 0.183066 | 0.229499 | 0.411079 | 0.093152 | 0.497869 | 0.250256 | 0.309655 | 0.599832 | 0.325762 | 0.169455 |
| Q92575 | UBX domai UBXN4 KIA    | -1.43539 | -1.1305  | -1.2185  | -1.10402 | -0.9417  | -1.16222 | -1.25789 | -1.30485 | -1.65748 | -1.38294 |
| Q92576 | PHD finger PHF3 KIAAC  | -0.73315 | -0.74348 | -0.45457 | -0.72655 | -0.29613 | -0.39422 | -0.73016 | -0.32623 | -0.35652 | -0.0726  |
| Q92597 | Protein ND NDRG1 CAI   | -1.40671 | -0.96872 | -1.69384 | -1.3227  | -1.98972 | -1.40014 | -1.75267 | -2.05555 | -2.20706 | -2.03839 |
| Q92598 | Heat shock HSPH1 HSP   | 0.082462 | 0.295167 | -0.09562 | -0.0172  | 0        | 0.275627 | -0.07346 | -0.22641 | 0.185556 | 0.110703 |
| Q92600 | CCR4-NOT CNOT9 RCI     | -1.85109 | -1.45834 | -0.66683 | -0.69737 | -1.38831 | -0.72505 | -0.95327 | -1.21744 | -1.4245  | -1.47947 |
| Q92608 | Dedicator c DOCK2 KIA  | 0.203214 | 0.246759 | 0.2824   | 0.252542 | 0.276604 | 0.676705 | 0.394092 | 0.34915  | 0.139217 | 0.305908 |
| Q92609 | TBC1 domæ TBC1D5 KI/   | -0.45724 | -0.57476 | 0.049516 | -0.11944 | -0.0836  | -0.19174 | -0.11084 | -0.09943 | -0.17388 | -0.42465 |
| Q92610 | Zinc finger ZNF592 KIA | -2.5099  | -2.77947 | -1.85896 | -1.10402 | -2.97122 | -3.02631 | -2.01027 | -2.80735 | -3.36018 | -2.9601  |
| Q92614 | Unconvent MYO18A CI    | -0.06193 | -0.07368 | 0.139864 | 0.035338 | -0.29613 | -0.0902  | -0.19704 | -0.32623 | -0.45649 | -0.47087 |
| Q92616 | eIF-2-alpha GCN1 GCN:  | 0.105182 | 0.405256 | 0.369485 | 0.329436 | -0.09212 | 0.115477 | -0.01543 | -0.02891 | 0.446516 | 0.174834 |
| Q92619 | Rho GTPas' ARHGAP45    | 0.275107 | 0.299828 | 0.249978 | 0.397684 | 0.466086 | 0.692817 | 0.396714 | 0.392749 | 0.40439  | 0.389364 |
| Q92620 | Pre-mRNA- DHX38 DD)    | -0.15725 | -0.3282  | -0.07452 | -0.34672 | -0.25784 | -0.05571 | -0.52693 | -0.14228 | -0.35993 | -0.16938 |
| Q92621 | Nuclear po NUP205 C7   | -1       | -1.01568 | 0.259781 | -0.34564 | -0.06853 | -0.28951 | -1.55459 | -1.33342 | -1.08746 | -1.03585 |
| Q92623 | Tetratricop TTC9 KIAAC | -3.03684 | -2.5541  | -2.02359 | -2.9386  | -2.74193 | -1.66935 | -2.16227 | -2.1193  | -1.91754 | -1.79414 |
| Q92625 | Ankyrin re' ANKS1A AN  | -1.11346 | -1.23676 | -1.19153 | -1.86821 | -2.84503 | -1.28951 | -1.38466 | -1.1193  | -1.37474 | -1.42986 |
| Q92664 | Transcripti GTF3A      | -1.1669  | -1.5427  | -0.83789 | -1.26053 | -0.69302 | -0.86449 | -1.13955 | -1.6735  | -1.59918 | -1.00888 |
| Q92665 | 28S ribosor MRPS31 IV  | 0.050608 | 0.120486 | 0.077755 | -0.01252 | -0.37724 | -0.04686 | 0.15994  | 0.274827 | 0.115442 | 0.095786 |
| Q92685 | DoI-P-Man ALG3 NOT     | -3.19438 | -3.77649 | -3.28345 | -2.84549 | -4.01495 | -3.79647 | -3.68012 | -3.33342 | -4.25739 | -3.54137 |

|        |                        |          |          |          |          |          |          |          |          |          |          |
|--------|------------------------|----------|----------|----------|----------|----------|----------|----------|----------|----------|----------|
| Q92688 | Acidic leuci ANP32B AF | 1.360211 | 1.309396 | 1.464386 | 1.339385 | 1.232977 | 1.268489 | 1.143537 | 1.369234 | 1.495829 | 1.054284 |
| Q92696 | Geranylger RABGGTA     | 1.879969 | 2.005837 | 1.179425 | 1.187933 | 1.602211 | 1.224733 | 1.443531 | 1.457348 | 1.264213 | 1.327229 |
| Q92733 | Proline-rich PRCC TPRC | -0.62803 | -0.44923 | -0.12199 | -0.21613 | -0.28703 | 0.100264 | -0.47422 | -0.24257 | 0.297201 | 0.073337 |
| Q92734 | Protein TFC TFG        | -0.5202  | -0.1829  | -0.72173 | -0.52851 | -0.77058 | -0.3506  | -0.45511 | -0.47763 | -0.62583 | -0.17839 |
| Q92769 | Histone de HDAC2       | 0.068052 | -0.0699  | -0.02574 | -0.07167 | 0.250307 | 0.212801 | 0.057194 | 0.21224  | 0.298964 | 0.564596 |
| Q92783 | Signal trans STAM STAN | 1.566662 | 1.567966 | 1.676853 | 1.654356 | 1.513829 | 1.733683 | 1.646718 | 1.6282   | 1.562791 | 1.238112 |
| Q92785 | Zinc finger DPF2 BAF4  | -0.5639  | -0.83789 | -0.61849 | -0.67557 | -0.30491 | -0.36318 | -1.02061 | -0.61096 | -1.04793 | -0.04039 |
| Q92793 | CREB-binding CREBBP CB | -0.30986 | 0.053581 | 0.12683  | 0.160134 | 0.28883  | 0        | -0.0574  | -0.18938 | 0.304855 | 0.654087 |
| Q92794 | Histone ac KAT6A MO    | -1.17081 | -1.04965 | -2.00782 | -2.71621 | -1.22487 | -1.65208 | -1.91073 | -1.60224 | -1.57089 | -1.6763  |
| Q92797 | Symplekin SYMPK SPK    | -0.02429 | -0.04496 | 0.377526 | 0.33762  | 0.244567 | 0.097023 | -0.07999 | -0.31734 | 0.013523 | 0.017402 |
| Q92800 | Histone-lys EZH1 KIAAC | -1.70499 | -1.91667 | -1.31221 | -1.05107 | -1.42999 | -1.42968 | -2.07346 | -3.51785 | -4.45003 | -1.80957 |
| Q92804 | TATA-binding TAF15 RBP | -1.00953 | -0.58132 | -0.50217 | -0.47856 | -0.71939 | -0.69413 | -0.056   | 0.129054 | -0.47333 | -0.24366 |
| Q92805 | Golgin subf GOLGA1     | -3.37126 | -2.19153 | -2.20945 | -2.0126  | -2.95606 | -3       | -1.9301  | -2.09464 | -2.14886 | -1.73402 |
| Q92828 | Coronin-2A CORO2A IR   | -2.54938 | -1.47565 | -1.82602 | -2.66562 | -2.78251 | -2.2463  | -2.0717  | -2.65086 | -2.59249 | -1.89107 |
| Q92835 | Phosphatid INPP5D SHI  | -0.67565 | -0.66102 | -0.16069 | -0.0126  | -0.57755 | -0.32329 | -0.22912 | -0.24257 | -0.63678 | -0.83303 |
| Q92841 | Probable A DDX17       | 0.40439  | 0.307822 | 0.370025 | 0.198904 | 0.531557 | 0.106015 | 0.422691 | 0.211592 | 0.353637 | 0.47782  |
| Q92844 | TRAF family TANK ITRAI | 0.266282 | 0.153585 | 0.596098 | 0.494152 | 0.567533 | 0.296824 | 0.409304 | 0.321588 | 0.437886 | 0.287548 |
| Q92851 | Caspase-10 CASP10 MC   | -0.91754 | -0.63656 | -1.41244 | -1.17306 | -1.12418 | -0.85457 | -0.9301  | -1.33342 | -0.95361 | -0.81735 |
| Q92854 | Semaphorin SEMA4D C    | -0.61869 | -0.68589 | 0.332805 | -0.17306 | 0.14828  | 0.212994 | -0.30035 | 0.177538 | 0.197939 | -0.04039 |
| Q92878 | DNA repair RAD50       | -0.47697 | -0.31285 | 0.092836 | 0.15451  | -0.09212 | -0.15565 | -0.31636 | -0.49491 | -0.28011 | -0.02935 |
| Q92882 | Osteoclast- OSTF1      | -0.41752 | 0.020037 | -0.29704 | -0.34362 | -0.70331 | -0.60145 | -0.63176 | -0.46158 | -0.57791 | -0.93288 |
| Q92888 | Rho guanine ARHGEF1    | -0.16011 | -0.08844 | -0.10932 | -0.46179 | -0.26503 | -0.26961 | -0.18008 | -0.20901 | -0.39941 | -0.2699  |
| Q92890 | Ubiquitin re UFD1 UFD1 | -0.36196 | 0.043505 | 0.902584 | 0.944959 | 0.347407 | 0.582688 | 0.902699 | 0.37418  | 0.57836  | 0.697697 |
| Q92896 | Golgi appa GLG1 CFR1   | -0.14064 | -0.09042 | -1.16273 | -0.69589 | -1.28934 | -1.01056 | -1.08443 | -1.1855  | -1.0109  | -1.09384 |
| Q92900 | Regulator c UPF1 KIAAC | 0.110807 | 0.175978 | 0.314109 | 0.257798 | 0.342816 | 0.52166  | 0.31988  | 0.534473 | 0.250407 | 0.455403 |
| Q92918 | Mitogen-ac MAP4K1 HI   | -1.43137 | -1.4928  | -1.40765 | -1.97222 | -1.39804 | -1.13841 | -2.21912 | -1.47098 | -1.63941 | -1.36881 |
| Q92922 | SWI/SNF co SMARCC1 F   | 0.963163 | 0.515742 | 1.162105 | 1.368829 | 1.342602 | 1.263945 | 1.175598 | 1.436348 | 1.323813 | 1.095322 |
| Q92925 | SWI/SNF-re SMARCD2 I   | -0.26577 | -0.40726 | -1.27504 | -1.24496 | -1.69382 | -1.1745  | -1.15468 | -1.49837 | -1.0305  | -0.93734 |
| Q92930 | Ras-related RAB8B      | 0.265054 | 0.249978 | 1.087004 | 0.875609 | 0.826352 | 1.120513 | 1.010196 | 1.123382 | 1.089126 | 0.894446 |
| Q92945 | Far upstream KHSRP FUB | -0.31268 | -0.33199 | 0.079643 | 0.368829 | -0.04591 | -0.13879 | -0.22737 | -0.02814 | 0.195062 | 0.248856 |
| Q92947 | Glutaryl-Cc GCDH       | -0.38685 | 0.040191 | 0.110759 | 0.260891 | 0.101393 | 0.503902 | 0.511822 | 0.40017  | 0.055145 | 0.120223 |
| Q92973 | Transporter TNPO1 KPN  | -0.79314 | -0.45457 | -0.74102 | -0.64738 | -0.55552 | -0.32329 | 0.141219 | -0.10076 | -0.49584 | -0.72249 |
| Q92974 | Rho guanine ARHGEF2 K  | -0.70988 | -0.69031 | -0.23613 | -0.60521 | -0.62274 | -0.43847 | -0.61889 | -0.56979 | -0.65278 | -0.20578 |

|        |                        |          |          |          |          |          |          |          |          |          |          |
|--------|------------------------|----------|----------|----------|----------|----------|----------|----------|----------|----------|----------|
| Q92979 | Ribosomal EMG1 C2F     | -0.12003 | 0.042266 | -0.85896 | -0.26806 | -0.49139 | -0.06711 | -0.34514 | -0.6644  | -0.31487 | -0.1589  |
| Q92989 | Polyribonu CLP1 HEAB   | -0.78629 | -0.93892 | -0.88753 | -0.72655 | -1.45017 | -1.2115  | -1.07346 | -1.04654 | -1.06756 | -1.36004 |
| Q92993 | Histone ac KAT5 HTAT   | -0.32496 | -0.60064 | -0.48153 | -0.25303 | 0.107446 | -0.28284 | -0.19704 | -0.27684 | -0.71823 | -0.41209 |
| Q93008 | Probable u USP9X DFF   | -1.25096 | -1.03953 | -0.52997 | -0.55424 | -0.26827 | -0.54244 | -1.13955 | -1.65535 | -0.66821 | -0.62087 |
| Q93009 | Ubiquitin c USP7 HAU5  | -0.1635  | 0.277254 | -0.41244 | -0.60709 | -0.39099 | -0.33703 | -0.41163 | -0.38639 | -0.17597 | -0.2402  |
| Q93033 | Immunogl c CD101 EWI   | 0.856726 | 0.801774 | -0.16069 | -0.05759 | -0.10007 | 0.115477 | 1.758294 | 1.914504 | 0.778786 | 0.412823 |
| Q93034 | Cullin-5 (CUL5 VACN    | 0.33082  | 0.445074 | 0.222702 | 0.298988 | 0.139093 | 0.338236 | 0.147006 | 0.211529 | 0.481381 | 0.501438 |
| Q93052 | Lipoma-pr LPP          | -2.0747  | -1.63154 | -1.498   | -3.10661 | -2.80556 | -2.20465 | -2.43221 | -2.18339 | -2.35053 | -2.22067 |
| Q93074 | Mediator o MED12 ARU   | -1.9459  | -1.44376 | -1.49047 | -2.11654 | -2.95031 | -2.32917 | -2.13955 | -1.86694 | -1.61671 | -1.73612 |
| Q93084 | Sarcoplasr ATP2A3      | 0.697639 | 0.69984  | 0.609595 | 0.438287 | 0.377367 | 0.334984 | 0.800028 | 0.423745 | 0.04182  | -0.08194 |
| Q95604 | HLA class I HLA-C HLA  | -1.68536 | -1.69849 | -0.95395 | -0.98751 | -2.69302 | -1.56866 | -1.71329 | -1.93289 | -1.37474 | -1.79414 |
| Q95IE3 | HLA class II HLA-DRB1  | 1.317071 | 1.3266   | 0.223506 | 0.187933 | -1.74193 | -0.82523 | 0.78229  | 0.760812 | -0.53629 | -0.51584 |
| Q969E4 | Transcripti TCEAL3 MS  | -0.27301 | -0.02167 | 0.468619 | 0.280103 | 0.993758 | 0.662965 | 0.93248  | 0.622633 | 0.944027 | 0.896825 |
| Q969E8 | Pre-rRNA-p TSR2        | 1.056467 | 1.332805 | 0.994139 | 1.460572 | 1.194503 | 2.008174 | 1.926538 | 1.899237 | 0.507484 | -0.59384 |
| Q969G3 | SWI/SNF-r SMARCE1 E    | -0.20832 | -0.25992 | -0.08231 | -0.4924  | 0.044123 | -0.06699 | -0.17483 | -0.15558 | 0.110703 | 0.223894 |
| Q969H8 | Myeloid-de MYDGF C19   | 1.366845 | 1.313164 | 1.218488 | 1.383329 | 1.474603 | 1.381247 | 1.455702 | 1.406612 | 1.057762 | 0.997786 |
| Q969J2 | Zinc finger ZKSCAN4 Z  | -2.85042 | -3.13906 | -3.6734  | -3.0906  | -2.42999 | -2       | -2.13955 | -1.97728 | -2.16993 | -3.1008  |
| Q969M3 | Protein YIP YIPF5 FING | -0.75527 | -0.57719 | 0.87376  | 0.739472 | 0.48755  | 0.245625 | -0.94973 | -0.95491 | -0.848   | -0.72668 |
| Q969M7 | NEDD8-cor UBE2F NCE    | -1.21569 | -0.03953 | -0.08112 | 0.149768 | 0.362474 | 0.057596 | -0.06746 | -0.01033 | 0.051598 | 0.13331  |
| Q969N2 | GPI transar PIGT CGI-0 | -1.74779 | -1.95873 | -2.32444 | -1.68003 | 0.141554 | 0.236377 | 0.464075 | 0.261125 | -0.03822 | -0.1589  |
| Q969P0 | Immunogl c IGSF8 CD81  | -1.44684 | -1.51218 | -1.10979 | -0.86649 | -1.23097 | -1.17387 | -1.37838 | -1.41659 | -0.76127 | -0.61472 |
| Q969Q0 | 60S ribosor RPL36AL    | -0.09029 | -0.32611 | -0.53721 | -0.90666 | -0.31748 | -0.6703  | -0.26434 | -0.58506 | -0.77902 | -0.5998  |
| Q969Q5 | Ras-relatec RAB24      | -1.15335 | -1.20945 | -1.69849 | -1.3377  | -1.62263 | -1.03317 | -1.05209 | -1.14439 | -1.32665 | -1.40621 |
| Q969R8 | KICSTOR cc ITFG2       | -3.72489 | -4.36146 | -3.77649 | -3.52356 | -3.2076  | -4.23704 | -4.81762 | -3.1193  | -2.37474 | -2.54137 |
| Q969S3 | Zinc finger ZNF622 ZPI | -2.76142 | -2.34115 | -3.0342  | -2.28085 | -2.83422 | -3.12558 | -2.19708 | -1.951   | -2.44682 | -2.81032 |
| Q969S9 | Ribosome-i GFM2 EFG2   | -2.85042 | -2.34156 | -3.4021  | -3.45317 | -2.59991 | -2.83494 | -1.96963 | -3.88982 | -2.1281  | -2.08194 |
| Q969W3 | Protein FAI FAM104A    | -1.81299 | -1.78102 | -1.97679 | -3.14505 | -1.45017 | -2.79647 | -2.28998 | -1.924   | -2.08746 | -2.51584 |
| Q969X5 | Endoplasm ERGIC1 ERU   | -1.55497 | -1.48699 | -1.66102 | -1.71621 | -1.51245 | -1.44448 | -1.74723 | -1.53434 | -2.1913  | -2.0268  |
| Q969X6 | U3 small nt UTP4 CIRH  | -1.01217 | -0.5427  | -0.0516  | 0.097024 | -0.72955 | -0.0902  | -0.68834 | -0.93289 | -0.47603 | -0.49075 |
| Q969Y2 | tRNA modi GTPBP3 M     | -1.80471 | -1.33442 | -1.39361 | -1.6899  | -1.42915 | -1.13301 | -0.99253 | -0.82258 | -1.16891 | -1.15304 |
| Q969Z0 | FAST kinas TBRG4 CPR   | 0.376645 | 0.216811 | 0.220163 | 0.085247 | 0.200987 | -0.17403 | -0.17377 | -0.47743 | -0.51592 | 0.749304 |
| Q96A19 | Coiled-coil CCDC102A   | -1.60942 | -1.37151 | -0.0516  | -1.30633 | -1.07635 | -1.17403 | -1.37137 | -1.39232 | -1.25739 | 0        |
| Q96A26 | Protein FAI FAM162A C  | 0.791683 | 0.90533  | 0.91983  | 0.826935 | 1.226636 | 1.117997 | 1.141219 | 1.099536 | 0.925007 | 1.135088 |

|        |                         |          |          |          |          |          |          |          |          |          |          |
|--------|-------------------------|----------|----------|----------|----------|----------|----------|----------|----------|----------|----------|
| Q96A33 | Coiled-coil CCDC47 GK   | -1.12663 | -1.52015 | -1.93147 | -1.9386  | -3.2076  | -3.23704 | -1.5697  | -1.88982 | -1.7028  | -1.99118 |
| Q96A35 | 39S ribosor MRPL24      | -0.00619 | -0.05803 | -0.30952 | -0.17839 | -0.44283 | -0.09377 | 0.017528 | -0.34067 | -0.426   | -0.2466  |
| Q96A49 | Synapse-as SYAP1 PRO    | -1.1236  | -1.02394 | -0.75039 | -0.69175 | -0.15454 | -0.40272 | -0.74295 | -0.91951 | -0.5793  | -0.7161  |
| Q96A65 | Exocyst cor EXOC4 KIA   | 0.192645 | -0.16069 | 0.226842 | 0.079322 | 0.014797 | 0.208271 | 0.251129 | 0.254993 | 0.230452 | -0.1589  |
| Q96AE4 | Far upstrea FUBP1       | 0.323765 | 0.345135 | 0.453019 | 0.00431  | 0.240294 | -0.06711 | 0.030374 | 0.441499 | 0.840641 | 0.795549 |
| Q96AG4 | Leucine-ric LRRC59 PR   | -0.07464 | 0.23017  | 0.396397 | 0.572362 | 0.449936 | 0.330645 | 0.290901 | 0.25634  | -0.10257 | 0.344759 |
| Q96AQ6 | Pre-B-cell l PBXIP1 HPI | -0.82094 | -0.63064 | -0.67165 | -0.51455 | -0.68092 | -0.42855 | -0.88819 | -0.7859  | -1.22727 | -0.94204 |
| Q96AT1 | Uncharact KIAA1143      | -3.10374 | -2.37622 | -2.28929 | -2.70136 | -1.82941 | -1.54692 | -1.28847 | -1.05004 | -2.05279 | -1.657   |
| Q96AT9 | Ribulose-pl RPE HUSSY   | -0.29101 | 0.097483 | 0.10649  | -0.10872 | 0.195731 | 0.306408 | 0.044565 | 0.115487 | 0.598123 | 0.628322 |
| Q96AX1 | Vacuolar pi VPS33A      | -0.92411 | -0.87268 | -1.06178 | -0.60823 | -0.98889 | -0.88385 | -0.73774 | -0.98685 | -0.68379 | -0.92542 |
| Q96AZ6 | Interferon- ISG20 HEM   | 0.513538 | 0.584178 | 0.379252 | 0.490002 | 0.150677 | 0.500744 | 0.429553 | 0.606105 | 0.591368 | 0.565758 |
| Q96B23 | Uncharact C18orf25 A    | 0.064057 | 0.029653 | -0.3761  | -0.51979 | -0.34182 | -0.40612 | -0.67715 | -0.56734 | 0.072977 | -0.08066 |
| Q96B26 | Exosome c EXOSC8 OII    | -0.09768 | -0.02667 | -0.03573 | 0.127826 | -0.19322 | -0.19904 | -0.07141 | -0.44674 | 0.257482 | 0.392605 |
| Q96B36 | Proline-ric AKT1S1 PR   | -0.07784 | -0.15788 | -0.25883 | -0.35204 | -0.42593 | -0.16271 | -0.48579 | -0.28516 | -0.04363 | 0.091781 |
| Q96B45 | BLOC-1-rel BORCS7 C1    | -2.94363 | -2.55483 | -2.24361 | -3.22034 | -2.42999 | -3.1375  | -1.85415 | -4.27684 | -2.78907 | -2.10985 |
| Q96B49 | Mitochond TOMM6 OF      | -1.35566 | -1.5656  | -1.73697 | -1.36976 | -3.2076  | -1.28951 | -1.24473 | -1.97728 | -3.08746 | -2.11991 |
| Q96B97 | SH3 domai SH3KBP1 C     | 0.423707 | 0.510997 | 0.160184 | 0.136308 | 0.18697  | 0.360747 | 0.105952 | 0.233062 | 0.399567 | 0.377996 |
| Q96BH1 | E3 ubiquiti RNF25       | -1.08746 | -1.18265 | -1.31221 | -1.45317 | -1.24236 | -1.35789 | -1.11718 | -1.27684 | -1.14886 | -0.83303 |
| Q96BJ3 | Axin intera AIDA C1orf  | -0.85342 | -1.31043 | -0.92028 | -0.72001 | -0.8201  | -0.92663 | -1.3322  | -1.21953 | -0.98963 | -0.88158 |
| Q96BK5 | PIN2/TERF PINX1 LPTL    | 0.304855 | 0.393431 | 0.151613 | -0.24558 | 0.383081 | 0.268489 | 0.278301 | -0.10076 | 0.100164 | 0.217326 |
| Q96BM9 | ADP-ribosy ARL8A ARL    | 1.312197 | 1.148099 | 1.367975 | 1.120294 | 0.813715 | 0.762961 | 0.888355 | 0.53842  | 1.030325 | 0.698396 |
| Q96BN8 | Ubiquitin tl OTULIN FAI | -0.37405 | -0.59434 | 0.110283 | -0.39883 | -0.31192 | -0.12999 | -0.77761 | -1.77591 | -0.58691 | -0.04977 |
| Q96BP3 | Peptidylprc PPWD1 KIA   | 0.207802 | 0.030437 | 0.36321  | 0.568764 | 0.10046  | 0.5035   | 0.468329 | 0.327886 | 0.328142 | 0.651591 |
| Q96BW5 | Phosphotri PTER         | 1.993925 | 1.862009 | 1.552098 | 1.835748 | 1.840956 | 1.860993 | 1.786745 | 1.860348 | 1.979822 | 2.004419 |
| Q96BW9 | Phosphatid TAMM41 C     | -0.1751  | -0.10248 | -0.14553 | -0.13815 | -1.05817 | -0.46841 | 0.162964 | -0.1844  | -0.15285 | -0.24792 |
| Q96BY6 | Dedicator c DOCK10 KI   | -0.46855 | -0.30256 | -0.52015 | -0.52356 | -0.30529 | 0.058254 | -0.18536 | -0.22909 | -0.29739 | -0.19391 |
| Q96BY7 | Autophagy ATG2B C14     | -3.5025  | -3.36146 | NA       | NA       | NA       | NA       | -3.74723 | -3.45372 | -3.61353 | -3.39453 |
| Q96BZ8 | Leukocyte l LENG1       | -0.77801 | -0.93581 | -1.10534 | -0.80259 | -0.78626 | -0.97079 | -0.94787 | -1.02163 | -0.61177 | -0.54081 |
| Q96C01 | Protein FAI FAM136A     | -0.17927 | -0.22293 | 0.12769  | 0.048337 | -0.23968 | -0.22389 | -0.11798 | 0.043243 | -0.0339  | 0.021544 |
| Q96C19 | EF-hand do EFHD2 SW     | 0.771716 | 1.080612 | -0.66352 | -0.53816 | -1.40778 | -0.35709 | -0.80616 | -0.68916 | -1.43376 | -1.1576  |
| Q96C23 | Galactose r GALM BLO    | 0.336875 | 0.283325 | 0.305605 | 0.394999 | 0.305412 | 0.262919 | 0.148448 | 0.242498 | 0.231739 | 0.022569 |
| Q96C86 | m7GpppX c DCPS DCS1     | 0.208003 | 0.234176 | -0.01399 | -0.16551 | -0.17521 | 0.109784 | -0.12483 | 0.058357 | -0.17846 | -0.17493 |
| Q96C90 | Protein pho PPP1R14B    | -3.5025  | -2.46529 | -3.62449 | -3.0906  | -3.59991 | -2.2115  | NA       | NA       | -3.45003 | -1.87299 |

|        |                          |          |          |          |          |          |          |          |          |          |          |
|--------|--------------------------|----------|----------|----------|----------|----------|----------|----------|----------|----------|----------|
| Q96CN7 | Isochorism ISOC1 CGI-    | -0.60989 | -0.43408 | -0.8575  | -0.54182 | -1.12719 | -0.82354 | -0.65603 | -0.67761 | -0.82221 | -0.45043 |
| Q96CN9 | GRIP and c GCC1          | -2.80004 | -2.65368 | -1.6133  | -1.2826  | -2.34112 | -2.34804 | -1.74512 | -2.18486 | -1.66098 | -1.47018 |
| Q96CP2 | FLYWCH fa FLYWCH2        | -0.36245 | -0.49287 | 0.043576 | -0.43973 | -0.45462 | -0.18466 | -0.39337 | 0.073421 | 0.318814 | 0.356427 |
| Q96CP6 | Protein Ast GRAMD1A      | -0.20177 | -0.22969 | -0.1693  | -0.1558  | -0.46703 | -0.21668 | -0.37447 | -0.34466 | -1.1094  | -0.74882 |
| Q96CS2 | HAUS augn HAUS1 CCE      | -1.11346 | -1.08017 | -1.09675 | -0.92663 | -0.83173 | -1.01097 | -1.16227 | -0.9886  | -0.68753 | -0.18886 |
| Q96CS3 | FAS-associ FAF2 ETEA     | -0.30986 | -0.33662 | 0.193132 | -0.0973  | -0.45332 | -0.36096 | 0.00315  | -0.37737 | -0.45003 | -0.44786 |
| Q96CT7 | Coiled-coil CCDC124      | -0.03063 | 0.087004 | 0.690206 | 0.359081 | 0.753234 | 0.606658 | 0.680628 | 0.61891  | 0.99054  | 0.937178 |
| Q96CV9 | Optineurin OPTN FIP2     | -0.38702 | -0.24599 | 0.437285 | 0.079322 | -0.19052 | 0.032421 | -0.03103 | 0.146841 | -0.32075 | -0.36573 |
| Q96CW1 | AP-2 comp AP2M1 CLA      | 0.622092 | 0.775623 | 0.541329 | 0.674392 | 0.415079 | 0.394712 | 0.305953 | -0.56968 | 0.432565 | 0.477606 |
| Q96CW6 | Probable R SLC7A6OS      | -3.03684 | -1.94642 | -3.31303 | -3.33154 | -2.74193 | -1.89465 | -3.91808 | -2.80735 | -2.94134 | -2.87857 |
| Q96CX2 | BTB/POZ d KCTD12 C1      | -1.13993 | -0.84488 | -2.00782 | -1.69574 | -2.59991 | -1.85457 | -1.63176 | -1.6735  | -1.20211 | -0.84888 |
| Q96D46 | 60S ribosor NMD3 CGI-    | -0.40296 | -0.14768 | -0.69218 | -0.89129 | -0.54463 | -0.95693 | -0.5175  | -1.07039 | -0.85651 | -0.40621 |
| Q96D71 | RalBP1-ass REPS1         | -0.20133 | -0.49796 | 0.007777 | -0.00629 | 0.276604 | 0.115477 | -0.26919 | -0.13808 | 0.073529 | 0.182653 |
| Q96D96 | Voltage-ga HVCN1 VSC     | 0.020786 | 0.245081 | -0.41483 | -0.55216 | 0.245986 | 0.268275 | -0.27124 | -0.61454 | -0.59932 | -0.83685 |
| Q96DA6 | Mitochond DNAJC19 T      | -0.61869 | -0.19599 | -0.83094 | -0.64582 | -0.77973 | -0.44448 | -0.80863 | -0.74846 | -0.36864 | -0.32082 |
| Q96DB5 | Regulator c RMDN1 FA     | 1.216318 | 1.066671 | 0.70941  | 0.812721 | 0.694708 | 0.41913  | 0.915731 | 1.028345 | 0.88727  | 0.966421 |
| Q96DF8 | Splicing fac ESS2 DGCR   | 0.081905 | 0.202827 | 0.752908 | 0.079432 | 0.183144 | -0.1192  | -0.08041 | -0.0141  | 0.162017 | 0.807678 |
| Q96DH6 | RNA-bindin MSI2          | 0.798669 | 0.875886 | 1.007777 | 1.286367 | 1.45537  | 1.095157 | 1        | 1.273018 | 1.46542  | 1.164999 |
| Q96DI7 | U5 small nt SNRNP40 P    | -0.60166 | -0.73853 | -0.90683 | -1.57658 | -1.34106 | -1.97446 | -1.10323 | -0.79698 | -0.6736  | -0.57178 |
| Q96DU3 | SLAM famil SLAMF6 KA     | 0.751631 | 0.945411 | 0.92394  | 0.842212 | 0.799171 | 0.733376 | 1.044192 | 1.110531 | 0.637124 | 0.475731 |
| Q96E11 | Ribosome-i MRRF          | 0.317405 | 0.546319 | 0.407755 | 0.382366 | 0.186023 | 0.245264 | 0.183433 | 0.269491 | 0.379219 | 0.39607  |
| Q96E39 | RNA bindin RBMXL1        | -0.60116 | -0.51829 | -0.23061 | -0.3943  | -0.77036 | -0.74735 | -0.17913 | -0.27637 | 0.102948 | -0.16788 |
| Q96E93 | Killer cell le KLRG1 CLE | -0.92903 | -1.18265 | -1.08844 | -1.05107 | -1.26006 | -1.42968 | -2.07346 | -1.65535 | -1.52947 | -1.2402  |
| Q96EB1 | Elongator c ELP4 C11or   | -2.68536 | -0.97679 | -0.20046 | -0.01894 | 0.014797 | -0.33015 | -0.54709 | -0.36995 | -0.52947 | -0.32082 |
| Q96EB6 | NAD-deper SIRT1 SIR2L    | -1.23661 | -0.96914 | -2.09476 | -2.00884 | -0.91341 | -0.93587 | -2.2387  | -2.5866  | -2.49145 | -1.57185 |
| Q96EE3 | Nucleopori SEH1L SEC1    | -0.03063 | 0.079643 | 0.3266   | 0.329436 | 0.029444 | 0.165059 | 0.060121 | 0.241889 | -0.05772 | 0.008824 |
| Q96E15 | Transcripti TCEAL4 NP    | -0.6002  | 0.112475 | -0.0039  | 0.037153 | 0.079567 | -0.15565 | 0.098853 | -0.46949 | 0.073529 | -0.10555 |
| Q96EK7 | Constitutiv FAM120B C    | -1.9184  | -1.88928 | -1.03745 | -1.41575 | -0.85294 | -1.03324 | -1.08951 | -1.38976 | -1.53889 | -1.83385 |
| Q96EK9 | Protein KTI KTI12 SBBH   | -1.06527 | -0.94865 | -1.7632  | -1.2909  | -1.20821 | -0.81705 | -1.34514 | -1.22239 | -1.02857 | -1.1589  |
| Q96EL3 | 39S ribosor MRPL53       | -0.24044 | -0.3937  | -0.02316 | 0.188195 | 0.060376 | -0.11764 | 0.168741 | -0.10472 | 0.181679 | -0.15349 |
| Q96EP0 | E3 ubiquiti RNF31 ZIBF   | -1.15335 | -1.33171 | -1.17383 | -1.17306 | -2.64572 | -1.06711 | -1.69661 | -1.26303 | -1.4892  | -1.29345 |
| Q96EP5 | DAZ-associ DAZAP1        | 1.12755  | 1.307822 | 1.437285 | 1.009378 | 1.45537  | 1.133025 | 1.017796 | 1.058894 | 1.390071 | 1.172872 |
| Q96EQ0 | Small gluta SGTB SGT2    | 0.476021 | 0.448744 | 0.880772 | 0.525645 | 0.858762 | 0.738514 | 0.512598 | 0.665814 | 1.170597 | 0.700247 |

|        |                         |          |          |          |          |          |          |          |          |          |          |
|--------|-------------------------|----------|----------|----------|----------|----------|----------|----------|----------|----------|----------|
| Q96ER3 | Protein SA/ SAAL1       | -3.80735 | -3.6734  | -3.28345 | -3.14505 | -3.27798 | -3.65208 | NA       | NA       | -3.3505  | -3.76377 |
| Q96EU6 | Ribosomal RRP36 C6o     | -1.49822 | -1.44454 | -1.24332 | -1.16974 | -0.93124 | -1.24021 | -1.84391 | -1.3034  | -1.23481 | -1.15748 |
| Q96EV2 | RNA-bindin RBM33 PRF    | -0.82585 | -0.58707 | -0.47074 | -0.42057 | -0.16285 | -0.32526 | -0.38096 | -0.36661 | -0.37516 | -0.42423 |
| Q96EY1 | DnaJ homo DNAJA3 HC     | -0.62974 | -0.64091 | -0.70272 | -1.23871 | -0.51589 | -0.63931 | -0.37967 | -1.63054 | -0.1618  | -0.28843 |
| Q96EY4 | Translation TMA16 C4c   | -0.2949  | 0.213452 | 0.186295 | 0.922694 | 0.388772 | 0.021695 | 0.186878 | -0.20249 | -0.01898 | 0.280628 |
| Q96EY5 | Multivesicu MVB12A Cl   | -2.98793 | -3.44392 | -3.6734  | -3.67557 | -3.01495 | -2.06711 | -3.68012 | -3.65535 | -4.67243 | -3.1008  |
| Q96EY8 | Corrinoid a MMAB        | 0.083689 | 0.212961 | -0.28555 | -0.09486 | 0.179134 | -0.0927  | 0.3279   | 0.479697 | 0.301961 | 0.273485 |
| Q96F07 | Cytoplasmic CYFIP2 KIA  | 0.215636 | 0.155892 | -0.09435 | -0.12244 | -0.22805 | -0.23526 | -0.16928 | -0.16782 | -0.27373 | -0.2761  |
| Q96F15 | GTPase IM, GIMAP5 IA    | 0.015981 | 0.187657 | -0.39515 | -0.64457 | -0.2076  | -0.17744 | 0.032631 | -0.06081 | -0.1913  | -0.44384 |
| Q96F63 | Coiled-coil CCDC97      | -0.9922  | -1.09142 | -1.31479 | -1.17419 | -1.15859 | -1.59551 | -1.3083  | -0.93341 | -0.81591 | -0.87049 |
| Q96F86 | Enhancer o EDC3 LSM1    | -0.90779 | -0.83789 | -0.23639 | 0.004703 | -0.38104 | -0.39316 | -0.60114 | -0.79861 | -0.13627 | -0.27638 |
| Q96FH0 | BLOC-1-rel; BORCS8 MI   | -2.50907 | -2.00078 | -1.33171 | -1.13124 | -1.09212 | -1.12553 | -1.41163 | -1.76783 | -2.53178 | -2.48562 |
| Q96FJ0 | AMSH-like STAMBPL1      | -2.98793 | -3.6734  | -4.07195 | -3.20163 | -2.47063 | -1.89465 | -4.43911 | -1.91119 | -2.14886 | -3.70487 |
| Q96FJ2 | Dynein ligh DYNLL2 DL   | -0.88359 | -0.87317 | -1.14768 | -1.07731 | -1.39046 | -0.48215 | -1.22069 | -1.848   | -1.15936 | -1.04495 |
| Q96FK6 | WD repeat WDR89 C1      | -0.6002  | -0.31221 | -0.37892 | -0.60709 | -0.70617 | -0.55858 | -0.81762 | -0.79826 | -0.36864 | -0.47684 |
| Q96FS4 | Signal-indu SIPA1 SPA1  | -1.2949  | -1.08017 | -0.93147 | -0.95067 | -1.02793 | -0.773   | -0.93928 | -0.922   | -0.9445  | -0.33192 |
| Q96FV2 | Secernin-2 SCRIN2       | -0.0183  | -0.16069 | -1.03953 | -0.64332 | -0.16528 | -0.70454 | -0.91905 | -1.55728 | -0.42142 | -0.29398 |
| Q96FV9 | THO compl THOC1 HPF     | -1.30986 | -1.50901 | -1.06378 | -1.52356 | -1.74193 | -1.52083 | -1.10613 | -1.61973 | -1.45003 | -1       |
| Q96FW1 | Ubiquitin tl OTUB1 OTF  | -0.12234 | -0.111   | -1.14732 | -1.0911  | -1.15783 | -1.26435 | -1.14956 | -0.99994 | -1.38723 | -1.00209 |
| Q96FZ2 | Abasic site HMCES C3c   | -1.72489 | -2.32193 | -2.00782 | -1.71621 | -1.55552 | -2.18641 | -2.35819 | -2.93289 | -1.73383 | -1.8893  |
| Q96FZ7 | Charged m CHMP6 VP      | -1.60093 | -1.76618 | -1.63661 | -1.42157 | -2.13454 | -1.73383 | -1.73166 | -1.771   | -1.90371 | -1.28667 |
| Q96G03 | Phosphoglu PGM2 MST     | 0.994873 | 1.144576 | 0.815132 | 0.731894 | 1.014797 | 0.925588 | 0.782841 | 0.817136 | 1.14988  | 1.106599 |
| Q96G21 | U3 small nt IMP4 BXDC   | -3.13993 | -2.19153 | -3.83094 | -3.45317 | NA       | NA       | -2.35819 | -4.16993 | -3.61353 | -1.90578 |
| Q96G28 | Cilia- and fl CFAP36 CC | -3.64689 | -2.44392 | -2.13906 | -1.84549 | -4.14048 | -2.95693 | -3.09516 | -4.39232 | -3.67243 | -2.39453 |
| Q96G46 | tRNA-dihyc DUS3L        | -0.88359 | -1.64874 | 0.087004 | 0.120294 | -0.33313 | 0.155278 | -0.46007 | 0.131245 | 0.494156 | -0.16882 |
| Q96GA3 | Protein LTV LTV1 C6orf  | 0.422595 | 0.408198 | 0.950418 | 1.223288 | 0.796692 | 0.989029 | 0.504305 | 0.427862 | 0.67925  | 0.582009 |
| Q96GC9 | Vacuole m VMP1 TDC      | -1.07464 | -0.80346 | -1.03154 | -0.53261 | -2.01495 | -1.03317 | -0.84493 | -1.19592 | -1.39941 | -1.0726  |
| Q96GD0 | Pyridoxal p PDXP CIN P  | -0.18703 | -0.15436 | -0.09129 | -0.1054  | -0.04502 | 0.045848 | -0.2453  | -0.0649  | -0.03147 | -0.02911 |
| Q96GF1 | E3 ubiquitin RNF185     | -3.43539 | -2.20945 | -1.66102 | -1.65567 | -2.69302 | -2.26303 | -1.28157 | -1.60224 | -1.9906  | -1.97369 |
| Q96GG9 | DCN1-like Ꞥ DCUN1D1 I   | 0.333327 | 0.03522  | 0.323272 | 0.361828 | 0.002602 | 0.449393 | 0.049528 | 0.321012 | 0.204456 | 0.207359 |
| Q96GM5 | SWI/SNF-rε SMARCD1 I    | -0.62463 | -0.66215 | -0.69416 | -0.73183 | -0.76852 | -0.76345 | -0.90575 | -0.68263 | -0.86474 | -0.80254 |
| Q96GQ7 | Probable A DDX27 cPE    | -1.20047 | -1.48661 | -0.65113 | -0.50928 | -0.97543 | -0.69991 | -0.71093 | -1.28739 | -1.24603 | -0.52534 |
| Q96GS4 | BLOC-1-rel; BORCS6 C1   | -1.74866 | -1.33344 | -2.07195 | -2.7234  | -1.82217 | -1.43459 | -2.892   | -2.99228 | -2.28011 | -2.51562 |



|        |                         |          |          |          |          |          |          |          |          |          |          |
|--------|-------------------------|----------|----------|----------|----------|----------|----------|----------|----------|----------|----------|
| Q96GX9 | Methylthio APIP CGI-2   | -0.71491 | -0.48153 | -0.29298 | -0.31411 | -0.53382 | -0.46697 | -0.61599 | -0.54265 | -0.20211 | -0.1788  |
| Q96GY3 | Protein lin- LIN37 MSTI | -0.96137 | -1.01171 | -1.22806 | -1.25491 | -1.22561 | -1.42437 | -1.14052 | -1.4667  | -1.32539 | -1.14092 |
| Q96HA1 | Nuclear en POM121 KI    | -1.53727 | -1.57719 | -1.77649 | -1.67557 | -1.81855 | -2.0902  | -1.52484 | -2.80735 | -3.00946 | -1.97369 |
| Q96HC4 | PDZ and LII PDLIM5 EN   | -0.5155  | -0.34928 | -0.04213 | -0.39384 | -0.04713 | -0.11964 | -0.27753 | -0.70931 | -0.16549 | -0.08561 |
| Q96HE7 | ERO1-like ꞑ ERO1A ERC   | -0.33258 | -0.53703 | 0.051111 | 0.189298 | -0.20362 | -0.15477 | -0.03761 | 0.077686 | -0.03025 | -0.10318 |
| Q96HI0 | Sentrin-spe SENP5 FKS   | 1.229304 | 1.45446  | 1.321928 | 1.073373 | 1.339666 | 1.117997 | 1.122543 | 1.446886 | 1.208179 | 0.801019 |
| Q96HN2 | Adenosylhc AHCYL2 KI    | -1.28011 | -1.44392 | -0.82402 | -1.4361  | -1.15697 | -1.05571 | -1.45305 | -1.55102 | -0.91754 | -0.08194 |
| Q96HS1 | Serine/thre PGAM5       | 0.047697 | 0.12683  | 0.451612 | 0.758136 | 0.657475 | 0.423211 | 0.696499 | 0.34915  | 0.520689 | 0.749304 |
| Q96HY6 | DDR GK dor DDRGK1 C     | 0.510324 | 0.839306 | 0.143384 | -0.02633 | 0.45167  | -0.06128 | 0.205802 | -0.23229 | -0.13444 | 0.538086 |
| Q96HY7 | Probable 2- DHTKD1 KI   | -1.82873 | -1.04757 | -1.68589 | -3.45317 | -1.15697 | -3.23704 | -1.81762 | -3.65535 | -1.848   | -1.40621 |
| Q96I15 | Selenocyste SCLY SCL    | 0.523035 | 0.668291 | -0.54966 | 0.203331 | 0.161638 | 0.283497 | 0.363491 | 0.115797 | 0.146692 | -0.15624 |
| Q96I24 | Far upstrea FUBP3 FBP   | -0.65946 | -0.67961 | -0.43162 | -0.60652 | -0.64344 | -0.34121 | -0.65749 | -0.28199 | -0.35575 | -0.10041 |
| Q96I25 | Splicing fac RBM17 SPF  | -0.36344 | -0.50348 | -0.4021  | -0.03814 | -0.51354 | -0.61288 | -0.60039 | -0.21573 | -0.38087 | 0.026311 |
| Q96I51 | RCC1-like ꞑ RCC1L WBS   | -1.18057 | -0.81028 | -1.11353 | -0.95067 | -1.39046 | -1.18641 | -1.09516 | -0.59358 | -1.46297 | -1.21945 |
| Q96I59 | Probable a: NARS2       | -0.51111 | -0.41244 | -0.88033 | -0.23816 | -1.01495 | -0.4975  | -0.17955 | -0.49346 | -0.65748 | -0.7713  |
| Q96I99 | Succinate-- SUCLG2      | 0.160465 | 0.11967  | 0.225768 | 0.030437 | 0.213868 | 0.220001 | 0.197814 | -0.14118 | 0.369176 | 0.190243 |
| Q96II8 | DISP compl LRCH3        | 0.224123 | 0.072245 | -0.34968 | -0.25503 | -0.27391 | -0.41747 | -0.25859 | -0.42868 | -0.55847 | -0.24889 |
| Q96IJ6 | Mannose-1 GMPPA         | -0.47697 | -0.03154 | -0.46529 | -0.5787  | -0.19052 | -0.38618 | -0.53222 | -0.52607 | -1.01898 | -0.97369 |
| Q96IU4 | Protein ABI ABHD14B C   | -0.818   | -0.55984 | -1.00782 | -0.64582 | -0.7051  | -0.68684 | -0.65574 | -0.86876 | -0.57791 | -0.60726 |
| Q96IZ7 | Serine/Argi RSRC1 SRR   | -1.5606  | -1.58596 | -1.26089 | -1.42905 | -2.39681 | -1.35817 | -1.44824 | -1.89546 | -1.01428 | -0.71132 |
| Q96J01 | THO compl THOC3         | -0.23661 | -0.43862 | -0.64874 | -0.4361  | -0.30529 | -1.04439 | -0.61599 | -0.6735  | -1.05772 | -0.50952 |
| Q96J02 | E3 ubiquiti ITCH        | -1.14277 | -1.27329 | -1.26145 | -1.66254 | 1.099559 | 1.253297 | -1.0426  | -1.50423 | -1.48195 | -1.38695 |
| Q96JB2 | Conserved COG3 SEC3     | 0.299939 | 0.193132 | 0.123255 | 0.225972 | -0.01495 | -0.12553 | -0.12832 | -0.00574 | 0.04182  | -0.21945 |
| Q96JB5 | CDK5 regul CDK5RAP3     | 0.116409 | 0.075949 | 0.203328 | 0.061401 | 0.405712 | 0.22691  | 0.06502  | 0.136462 | 0.273994 | 0.127005 |
| Q96JG6 | Syndetin (CVPS50 CCD    | -1.89482 | -1.30256 | -0.13272 | -0.5146  | -1.76702 | -3       | -0.38848 | -1.00018 | -0.53885 | 0.147868 |
| Q96JH7 | Deubiquiti VCIPI1 KIA   | -0.48338 | -0.49984 | -0.45133 | -0.4732  | -0.59047 | -0.78534 | -0.59667 | -0.69473 | -0.77556 | -0.83934 |
| Q96JJ3 | Engulfment ELMO2 CEL    | -1.61585 | -1.15545 | -0.83482 | -0.90532 | -1.22918 | -0.73391 | -0.53972 | -0.67016 | -1.42073 | -1.29971 |
| Q96JJ7 | Protein dis TMX3 KIAA   | 1.113611 | 0.737745 | 0.529314 | 0.555389 | 0.365871 | 0.498638 | 0.257053 | 0.39776  | 0.164677 | 0.79593  |
| Q96JM3 | Chromosom CHAMP1 C      | 0.110807 | -0.22475 | -0.12263 | -0.11475 | 0.051139 | -0.00149 | 0.025356 | 0.005714 | 0.145944 | 0.045529 |
| Q96JM7 | Lethal(3)m L3MBTL3 K    | -1.61864 | -1.67988 | -1.5856  | -1.29296 | -1.05225 | -1.40113 | -1.60666 | -1.27819 | -2.58026 | -2.21739 |
| Q96JP5 | E3 ubiquiti ZFP91 ZNF   | -3.03684 | -2.2276  | -1.70406 | -1.64665 | -2.13417 | -2.22972 | -1.67059 | -3.07039 | -1.78999 | -1.41857 |
| Q96JY6 | PDZ and LII PDLIM2 PP   | -1.03119 | -1.0083  | -1.19153 | -0.91786 | -0.61123 | -0.98911 | -1.24977 | -1.3122  | -1.06507 | -1.04005 |
| Q96K17 | Transcripti BTF3L4      | 0.246044 | 0.122554 | -0.2503  | -0.26566 | 0.144571 | 0.220579 | -0.25688 | 0.087925 | 0.341562 | 0.226984 |

|        |                                  |          |          |          |          |          |          |          |          |          |          |
|--------|----------------------------------|----------|----------|----------|----------|----------|----------|----------|----------|----------|----------|
| Q96K21 | Abscission/ ZFYVE19 AI           | -3.20513 | -2.30578 | -1.97974 | -2.99095 | -3.55353 | -2.78852 | -2.13955 | -3.1193  | -3.62869 | -2.54924 |
| Q96K76 | Ubiquitin c USP47                | -0.40296 | -0.16944 | 0.301509 | -0.15071 | -0.07635 | 0.032421 | 0.32376  | 0.094731 | 0.15624  | 0.277835 |
| Q96KG9 | N-terminal SCYL1 CVAI            | -1.90695 | -1.19025 | -1.18945 | -1.6056  | -2.44665 | -2.213   | -1.37916 | -1.85075 | -1.8081  | -1.73089 |
| Q96KM6 | Zinc finger ZNF512B KI           | -1.26863 | -1.06378 | -0.5427  | -0.82535 | -0.64797 | -0.28507 | -0.22048 | -0.77761 | -0.51391 | -0.29243 |
| Q96KP4 | Cytosolic n CNDP2 CN2            | 0.787761 | 1.108686 | 0.777361 | 0.673884 | 0.832591 | 0.71674  | 0.893329 | 0.730059 | 0.905919 | 0.941879 |
| Q96KQ7 | Histone-lys EHMT2 BA             | -0.74393 | -0.55761 | -0.11661 | -0.61898 | -0.4188  | -0.50141 | -0.3763  | -0.50014 | -0.2605  | -0.51734 |
| Q96KR1 | Zinc finger ZFR                  | 0.519102 | 0.387696 | 0.588241 | 0.400084 | 0.729221 | 0.513636 | 0.371025 | 0.572312 | 0.600737 | 0.75293  |
| Q96L73 | Histone-lys NSD1 ARA2            | -1.15739 | -0.23994 | -0.01879 | 0.190409 | -0.24969 | -0.9658  | -0.41266 | -0.37149 | -0.28175 | -0.59186 |
| Q96L91 | E1A-bindin EP400 CAG             | -0.55497 | 0.09067  | 0.203328 | -0.13124 | -0.01495 | 0.282035 | -0.13393 | -0.01728 | 0.117652 | 0.224919 |
| Q96L92 | Sorting nex SNX27 KIA            | 0.304855 | 0.27275  | 0.445898 | 0.605721 | 0.539639 | 0.236377 | 0.437877 | 0.592576 | 0.246438 | 0.458627 |
| Q96LJ7 | Dehydroge DHRS1 SDR              | -1.82913 | -1.72562 | -1.57046 | -1.47845 | -2.27047 | -1.32312 | -1.62678 | -1.79708 | -1.4515  | -1.31792 |
| Q96LT9 | RNA-bindin RNPC3 KIA             | -1.30986 | -0.80346 | -1.97345 | -2.06868 | -0.69302 | -0.55254 | -0.73867 | -0.54265 | -0.67996 | -0.41799 |
| Q96M27 | Protein PRI PRRC1                | 0.846082 | 0.879443 | 0.572719 | 0.559833 | 0.823812 | 0.840499 | 0.911867 | 0.990616 | 0.906016 | 0.482815 |
| Q96ME7 | Zinc finger ZNF512 KIA           | -0.16674 | -0.22339 | -0.40531 | -0.16515 | -0.03767 | -0.22434 | -0.10954 | -0.5763  | -0.22464 | 0.056432 |
| Q96MF7 | E3 SUMO- $\gamma$ NSMCE2 C $\xi$ | -1.76553 | -1.21262 | -1.12964 | -1.09507 | -1.69906 | -1.93723 | -1.56309 | -1.01348 | -1.46274 | -1.16858 |
| Q96MM6 | Heat shock HSPA12B C             | -1.98793 | -2.36146 | -2.19153 | -2.67557 | -4.01495 | -3       | -3.09516 | -1.848   | -1.65748 | -2.1788  |
| Q96MU7 | YTH domai YTHDC1 KI              | -0.7978  | -1.29255 | -0.93734 | -0.80883 | -0.3654  | -0.45374 | -0.65834 | -0.85678 | -0.42524 | -0.87508 |
| Q96MW1 | Coiled-coil CCDC43               | -0.37912 | 0.087004 | 0.101614 | 0.171318 | 0.843031 | 0.386058 | 0.005107 | 0.611435 | 0.658492 | 0.746669 |
| Q96MX6 | WD repeat WDR92                  | -0.85042 | -1.06378 | -1.66102 | -1.13124 | -0.7051  | -1.14958 | -1.11718 | -0.93289 | -0.71823 | -1.59384 |
| Q96N66 | Lysophospl MBOAT7 B              | -0.58193 | -0.73697 | -0.84488 | -0.92663 | -1.27798 | -1.03317 | -1.42531 | -1.16993 | -1.30319 | -1.21945 |
| Q96N96 | Spermatog SPATA13                | -1.45187 | -1.37151 | -0.77649 | -1.10402 | -0.9852  | -0.87447 | -0.90115 | -0.88982 | -1.38702 | -1.55431 |
| Q96NB3 | Zinc finger ZNF830 CC            | -1.61704 | -1.36097 | -0.99214 | -0.98435 | -0.92251 | -0.86576 | -1.25453 | -1.05356 | -0.66159 | -0.57233 |
| Q96NC0 | Zinc finger ZMAT2                | 1.024045 | 1.213452 | 1.546769 | 1.255172 | 1.482236 | 1.31755  | 1.231136 | 1.091498 | 1.564386 | 1.339522 |
| Q96P11 | 28S rRNA (i NSUN5 NSL            | -0.41789 | -0.17879 | -0.08168 | 0.050148 | -0.37178 | -0.05782 | -0.29851 | -0.13194 | 0.029556 | 0.050188 |
| Q96P16 | Regulation RPRD1A P1             | -1.02445 | -1.16506 | -0.77649 | -0.92663 | -0.8055  | -0.60977 | -0.97968 | -0.75811 | -0.74169 | -0.71937 |
| Q96P48 | Arf-GAP wi ARAP1 CEN             | -1.06193 | -0.51457 | -2.68726 | -2.67779 | -1.26006 | -1.03317 | -1.17377 | -1.09464 | -2.1478  | -1.71358 |
| Q96P70 | Importin-9 IPO9 IMP9             | -0.5478  | -0.55866 | -0.44058 | -0.4133  | -0.86359 | -0.32968 | -0.662   | -0.86854 | -1.01034 | -0.73824 |
| Q96PE3 | Inositol pol INPP4A              | -1.75734 | -1.67195 | -1.30128 | -1.41108 | -1.63806 | -1.28433 | -1.19646 | -0.68129 | -0.93772 | -0.78816 |
| Q96PK6 | RNA-bindin RBM14 SIP             | -0.25819 | 0.083971 | 0.228652 | 0.318356 | -0.09622 | 0.130264 | 0.239827 | 0.066545 | 0.266856 | 0.717361 |
| Q96PN7 | Transcriptio TRERF1 BC           | -2.53727 | -3.57719 | -1.49796 | -1.9386  | -3.27798 | -3.40054 | -0.81762 | -1.1571  | -2.00946 | -1.87299 |
| Q96PP8 | Guanylate- GBP5 UNQ              | -0.35566 | -0.25061 | 0.079643 | 0.165737 | -1.22487 | -1.14958 | -0.47422 | -0.97728 | -0.52947 | -0.53495 |
| Q96PP9 | Guanylate- GBP4                  | -1.6916  | -1.41561 | -1.32274 | -1.59215 | -2.30663 | -1.71379 | -1.42957 | -1.2257  | -1.41674 | -1.2661  |
| Q96PU8 | Protein qu $\alpha$ QKI HKQ      | -0.81369 | -0.2674  | -0.29642 | -0.02818 | -0.37293 | -0.4258  | -0.51931 | -0.35325 | -0.46053 | -0.4615  |

|        |                         |          |          |          |          |          |          |          |          |          |          |
|--------|-------------------------|----------|----------|----------|----------|----------|----------|----------|----------|----------|----------|
| Q96PV6 | Leukocyte   LENG8 KIAA  | -0.30236 | -0.41244 | -0.03953 | -0.62632 | -0.24236 | -0.01097 | -0.04679 | -0.4459  | 0.073529 | 0.118877 |
| Q96PY6 | Serine/thre NEK1 KIAA   | -0.9523  | -0.58887 | 0.094327 | 0.006259 | 0.879867 | 0.23173  | 0.257053 | 0.432111 | 0.104556 | 0.186547 |
| Q96PZ0 | Pseudourid PUS7 KIAA    | 0.280108 | 0.189718 | 0.600476 | 0.359081 | 0.306978 | 0.570316 | 0.648351 | 0.914504 | 0.99054  | 0.759796 |
| Q96PZ2 | Serine prot FAM111A h   | -0.85042 | -0.60064 | -0.11775 | 0.061401 | -1.07635 | -0.40054 | -0.68834 | -0.922   | -0.65748 | -0.23499 |
| Q96Q05 | Trafficking TRAPPC9 K   | -1.35566 | -1.58887 | -1.20945 | -1.20163 | -1.17365 | -1.52083 | -1.28157 | -2.27684 | -1.97199 | -1.8893  |
| Q96Q11 | CCA tRNA r TRNT1 CGI    | 0.51881  | 0.253253 | 0.083328 | -0.27563 | 0.354283 | -0.10776 | -0.29406 | -0.53434 | -0.44361 | 0.159066 |
| Q96Q15 | Serine/thre SMG1 ATX    | -1.09999 | -1.26326 | -0.7985  | -1.4583  | -0.89072 | -1.00632 | -1.01174 | -1.23361 | -0.98111 | -0.81189 |
| Q96QC0 | Serine/thre PPP1R10 C   | -0.9535  | -1.00612 | -0.71215 | -1.66755 | -0.99504 | -0.90974 | -1.51983 | -1.19045 | -1.21256 | -1.30288 |
| Q96QK1 | Vacuolar pi VPS35 MEN   | -0.10692 | -0.05936 | -0.42986 | -0.42764 | -0.88567 | -0.77761 | -0.31937 | -0.68131 | -0.18093 | -0.31531 |
| Q96QR8 | Transcripti PURB        | -0.14627 | -0.55939 | -0.20928 | -0.31495 | -0.09456 | -0.33784 | -0.19487 | -0.02506 | -0.14824 | -0.16875 |
| Q96QT6 | PHD finger PHF12 KIAA   | -3.57289 | -3.4021  | -1.87317 | -3.26053 | -2.84503 | -2.79647 | -1.76451 | -2.97728 | -1.61353 | -2.28264 |
| Q96RD9 | Fc receptor FCRL5 FCRL  | 0.987825 | 1.648528 | 0.70941  | 0.689785 | 1.303969 | 0.912708 | 0        | -0.02308 | 0.588102 | 0.471451 |
| Q96RF0 | Sorting nex SNX18 SH3   | -1.88398 | -2.25133 | -1.29051 | -1.47328 | -1.65974 | -3.68727 | -1.67252 | -1.32354 | -2.21565 | -2.03656 |
| Q96RK0 | Protein cap CIC KIAA03  | -2.85042 | -2.20945 | -1.20945 | -1.67557 | -1.15099 | -1.04088 | -1.60039 | -1.16993 | -1.20211 | -1.95641 |
| Q96RL1 | BRCA1-A cc UIMC1 RAF    | -1.5025  | -0.81381 | -0.74527 | -1.06413 | -1.29613 | -1.2115  | -1.3322  | -1.60224 | -0.92647 | -0.71937 |
| Q96RL7 | Vacuolar pi VPS13A CH   | 0.270089 | 0.338983 | 0.603045 | 0.646363 | 0.744383 | 0.451461 | 0.164229 | 0.584963 | -0.24616 | 0.017594 |
| Q96RN5 | Mediator o MED15 AR     | -1.46855 | -1.36146 | -1.35147 | -1.30633 | -1.71727 | -1.33015 | -1.08427 | -1.46949 | -0.78978 | -0.75627 |
| Q96RP9 | Elongation GFM1 EFG     | -1.04906 | -1.16593 | -1.22245 | -0.86089 | -0.94845 | -0.64203 | -0.98017 | -0.90368 | -1.12158 | -1.11512 |
| Q96RQ3 | Methylcrot MCCC1 MC     | -1.25096 | -0.68589 | -0.61849 | -0.75803 | -0.91341 | -1.33015 | -0.76451 | -0.70116 | -0.54314 | -0.57394 |
| Q96RQ9 | L-amino-ac IL4I1 FIG1 l | -1.80735 | -1.01568 | -0.5427  | -0.92663 | -1.29613 | -1.05571 | -0.90115 | -1.05842 | -1.15936 | -1.13927 |
| Q96RR1 | Twinkle pro TWNK C10    | -2.68536 | -1.43335 | NA       | NA       | -2.95606 | -2.72247 | -3.05209 | -2.76783 | -4.3505  | -1.80957 |
| Q96RR4 | Calcium/ca CAMKK2 C     | 0.576857 | 0.499286 | 1.231831 | 1.085247 | 1.217071 | 1.179608 | 1.338207 | 1.241889 | 0.879603 | 0.692931 |
| Q96RS0 | Trimethylg TGS1 HCA1    | -3.35109 | -3.34169 | -2.44392 | -3.38606 | -3.21748 | -3.1994  | -3.3322  | -3.80735 | -3.3505  | -3.06333 |
| Q96RS6 | NudC dom; NUDCD1 CI     | -2.09443 | -1.17299 | -1.77417 | -0.97163 | -1.21789 | -0.83041 | -1.93698 | -2.19592 | -0.96962 | -0.80438 |
| Q96RT1 | Erbin (Dens ERBIN ERBI  | -0.75527 | -0.36146 | -0.11353 | 0.061401 | 0.300954 | 0.069348 | -0.11718 | -0.2091  | 0.1133   | 0.143125 |
| Q96RU3 | Formin-bin FNBP1 FBP    | -0.41908 | -0.37151 | 0.049455 | 0.093966 | 0.141995 | 0.060827 | 0.000326 | -0.00574 | 0.27092  | 0.385106 |
| Q96S19 | Methyltran METTL26 JI   | -0.77588 | -0.16944 | 0        | 0.507657 | -0.03767 | 0.027068 | -0.31937 | -0.42269 | -0.1541  | 0.139112 |
| Q96S44 | EKC/KEOPS TP53RK C2I    | -0.909   | -1.01497 | -0.87035 | -1.12072 | -1.02822 | -0.92998 | -0.93419 | -1.18298 | -1.29304 | -1.25374 |
| Q96S55 | ATPase WR WRNIP1 W      | 0.26     | 0.179425 | -0.152   | -0.34997 | -0.03046 | -0.31452 | -0.01752 | -0.21518 | 0.063871 | 0.28418  |
| Q96S66 | Chloride ch CLCC1 KIAA  | 0.518308 | 0.817606 | 0.979862 | 0.501356 | 0.706385 | 0.466876 | 0.533853 | 0.546005 | 0.62304  | 0.682946 |
| Q96S97 | Myeloid-as MYADM UI     | 0.856726 | 0.665835 | 0.886471 | 1.249907 | 1.007417 | 0.980745 | 0.904843 | 2.103538 | 0.781531 | 0.73608  |
| Q96S99 | Pleckstrin h PLEKHF1 AI | -0.51111 | -0.14768 | -0.12624 | 0.294061 | -0.42999 | -0.1989  | -0.06274 | -0.36995 | -0.5639  | -0.51584 |
| Q96SB3 | Neurabin-2 PPP1R9B P    | -1.12869 | -1.16721 | -1.01568 | -1.07731 | -1.26006 | -1.48981 | -1.6477  | -1.33342 | -1.5025  | -1.11032 |

|        |                          |          |          |          |          |          |          |          |          |          |          |
|--------|--------------------------|----------|----------|----------|----------|----------|----------|----------|----------|----------|----------|
| Q96SB8 | Structural r SMC6 SMC    | -1.2949  | -1.24598 | -0.94306 | -1.28772 | -2.16937 | -1.63951 | -1.87276 | -2.05141 | -1.64962 | -1.7816  |
| Q96SK2 | Transmeml TMEM209        | -1.35811 | -1.75109 | -1.80065 | -1.48764 | -2.33212 | -2.1775  | -1.86608 | -1.94781 | -1.6597  | -1.95132 |
| Q96ST2 | Protein IW: IWS1 IWS1    | -0.34023 | -0.26929 | 0.119902 | -0.14545 | 0.123693 | -0.08998 | -0.02908 | 0.223718 | 0.429402 | 0.275578 |
| Q96ST3 | Paired amp SIN3A         | -0.63743 | -0.64264 | -0.4761  | -0.71621 | -0.26006 | -0.27621 | -0.46713 | -0.26303 | -0.24616 | -0.01334 |
| Q96SU4 | Oxysterol-t OSBPL9 OR    | 1.009064 | 1.196539 | 1.358883 | 1.123177 | 1.419678 | 1.247928 | 1.441649 | 1.258734 | 1.277888 | 1.137101 |
| Q96SW2 | Protein cer CRBN AD-0    | 0.596467 | 0.741327 | 0.936099 | 0.726585 | 0.609977 | 0.973156 | 0.580972 | 0.75853  | 0.963744 | 1.035677 |
| Q96SZ5 | 2-aminoetf ADO C10or     | -1.55673 | -2.127   | -0.933   | -1.28343 | -1.39628 | -1.44702 | -0.93658 | -1.39561 | -1.00703 | -0.82884 |
| Q96T23 | Remodelin; RSF1 HBXA     | -1.70499 | -1.574   | -1.77947 | -1.9034  | -1.21997 | -1.66977 | -1.35532 | -1.57643 | -1.53456 | -1.47631 |
| Q96T37 | RNA-bindin RBM15 OT      | -1.12935 | -1.01795 | -0.76577 | -1.03426 | -0.60859 | -0.71309 | -0.95468 | -0.45372 | -0.68207 | -0.67155 |
| Q96T51 | RUN and F) RUFY1 RAB     | -0.93678 | -0.99222 | -1.34658 | -0.95691 | -1.02063 | -1.45943 | -1.4144  | -1.18286 | -1.71673 | -0.84003 |
| Q96T58 | Msx2-inter SPEN KIAA     | -0.818   | -1.14768 | -0.81028 | -0.814   | -1.16149 | -0.91511 | -1.04152 | -0.81741 | -1.02857 | -0.62081 |
| Q96T60 | Bifunctiona PNKP         | -0.69844 | -0.99515 | -0.50901 | -0.81207 | -0.47502 | -0.60374 | -1.63176 | -0.6475  | -1.13046 | -1.30944 |
| Q96T76 | MMS19 nu MMS19 MI        | 0.876672 | 0.641046 | -0.65676 | -1.12046 | 0.161638 | 0.386058 | 0.628633 | 0.241889 | -1.62796 | -1.55931 |
| Q96TA1 | Protein Nik NIBAN2 C9    | -1.54525 | -1.29048 | -2.06057 | -1.93208 | -0.99184 | -0.88223 | -1.16391 | -1.67477 | -2.08509 | -1.96458 |
| Q96TC7 | Regulator c RMDN3 FA     | 0.560509 | 0.465798 | 0.210086 | 0.198904 | 0.306978 | 0.245625 | 0.376148 | 0.436348 | -0.00946 | -0.11991 |
| Q99417 | c-Myc-bind MYCBP AM      | 0.024489 | 0.300015 | 0.092318 | 0.179966 | 0.110889 | 0.103454 | 0.379351 | 0.162652 | 0.251239 | 0.181298 |
| Q99418 | Cytohesin-; CYTH2 ARN    | -1.20832 | -1.10512 | -1.4761  | -1.86821 | -1.55552 | -1.55254 | -1.25691 | -0.96605 | -1.4245  | -1.01781 |
| Q99426 | Tubulin-fof TBCB CG22    | -0.83954 | -1.4021  | -0.29152 | -0.23281 | -0.32597 | 0.024262 | -0.56212 | -0.60135 | -0.56662 | -0.27638 |
| Q99436 | Proteasom PSMB7 Z        | 0.381307 | 0.445898 | -0.20945 | -0.36167 | 0.213868 | 0.427281 | 0.67423  | 0.7022   | 0.032631 | -0.41799 |
| Q99439 | Calponin-2 CNN2          | 0.006049 | 0.363436 | -0.05397 | -0.41923 | -0.31451 | -0.56659 | -0.08901 | -0.17655 | -0.31487 | -0.1589  |
| Q99442 | Translocati SEC62 TLO    | 1.845392 | 1.934211 | 2.03594  | 2.276975 | 1.249355 | 1.792657 | 1.759627 | 1.158376 | 1.0926   | 1.316411 |
| Q99447 | Ethanolam PCYT2          | -0.25096 | -0.12052 | -0.69499 | -0.8407  | -0.77658 | -0.49987 | -0.48433 | -0.26333 | 0.033786 | -0.14836 |
| Q99459 | Cell divisioi CDC5L KIAA | -0.32496 | -0.19599 | -0.25992 | -0.23078 | -0.00746 | -0.56058 | -0.06274 | -0.36257 | -0.16463 | 0.047877 |
| Q99460 | 26S protea PSMD1         | 0.343635 | 0.339836 | 0.382188 | 0.393731 | 0.470053 | 0.368544 | 0.315856 | 0.29307  | 0.45265  | 0.479622 |
| Q99471 | Prefoldin si PFDN5 MM    | -0.05683 | -0.30412 | -0.15702 | -0.44122 | -0.37913 | -0.43673 | -0.61656 | -0.31705 | -0.05636 | -0.43215 |
| Q99490 | Arf-GAP wi AGAP2 CEN     | -0.67565 | -0.64264 | -0.65849 | -0.95532 | -0.85845 | -1.1375  | -0.87276 | -1.2091  | -1.39941 | -0.93934 |
| Q99496 | E3 ubiquitit RNF2 BAP1   | 0.45391  | 0.695031 | 0.482639 | 0.171318 | 0.783791 | 0.662965 | 0.515085 | 0.770913 | 0.751041 | 0.573113 |
| Q99497 | Parkinson c PARK7        | 0.533997 | 0.401588 | 0.632176 | 0.270889 | 0.352404 | 0.322802 | 0.517218 | 0.588367 | 0.607001 | 0.595168 |
| Q99536 | Synaptic ve VAT1         | -0.75527 | -0.40726 | 0.046047 | 0.198904 | 0.107446 | 0.120513 | -0.16227 | -0.36995 | 0.168877 | 0.75718  |
| Q99543 | DnaJ homo DNAJC2 MI      | 0.953805 | 0.92805  | 0.384498 | 0.344335 | 0.875821 | -0.02203 | 0.638526 | 0.078003 | 0.312468 | 0.461843 |
| Q99547 | M-phase pl MPHOSPH       | -0.21068 | -0.16908 | -0.24732 | -0.74755 | -0.23012 | -0.39724 | -0.50128 | -0.45427 | 0.203345 | -0.08211 |
| Q99549 | M-phase pl MPHOSPH       | -1.55497 | -1.80346 | -1.73697 | -1.48794 | -0.98258 | -1.33705 | -1.53964 | -0.99289 | -1.37474 | -1.11749 |
| Q99567 | Nuclear po NUP88         | -0.3081  | -0.2276  | -0.07131 | 0.027108 | -0.02204 | 0.04581  | 0.044084 | -0.23119 | -0.02139 | 0.01617  |

|        |              |          |       |          |          |          |          |          |          |          |          |          |          |
|--------|--------------|----------|-------|----------|----------|----------|----------|----------|----------|----------|----------|----------|----------|
| Q99570 | Phosphoino   | PIK3R4   | VPS   | 1.650147 | 1.851243 | 1.804009 | 2.017147 | 1.648015 | 1.902512 | 1.756781 | 1.935609 | 1.577083 | 1.552139 |
| Q99575 | Ribonuclea   | POP1     | KIAA  | -0.68536 | -0.18709 | -0.43335 | 0.299168 | -0.19903 | -0.37197 | -0.42531 | -0.58496 | -0.53629 | -0.10555 |
| Q99576 | TSC22 dom    | TSC22D3  | D     | -1.91754 | -1.91667 | -1.83906 | -2.25865 | -1.64459 | -2.14415 | -1.66245 | -1.82283 | -1.7709  | -1.22003 |
| Q99590 | Protein SC/  | SCAF11   | CA    | -0.81852 | -0.51814 | -0.64032 | -0.70725 | -0.56754 | -0.67001 | -0.83132 | -0.68124 | -0.61847 | -0.58761 |
| Q99598 | Translin-as  | TSNAX    | TRA   | -0.19836 | -0.15899 | -1.02172 | -0.41089 | -0.54565 | -0.19558 | -0.10075 | -0.01373 | -0.1544  | -0.56044 |
| Q99613 | Eukaryotic   | EIF3C    | EIF3E | -0.45978 | -0.21517 | -0.09891 | -0.13205 | -0.48727 | -0.37197 | -0.41163 | -0.07039 | -0.02873 | -0.16883 |
| Q99614 | Tetratricop  | TTC1     | TPR1  | 0.229304 | 0.457303 | 0.422815 | 0.220599 | 0.051139 | 0.169925 | 0.025356 | 0.222392 | 0.510796 | 0.355175 |
| Q99615 | DnaJ homo    | DNAJ7    | TP    | -0.8525  | -0.55093 | -1.5656  | -1.48794 | -0.53271 | -1.1989  | -1.51019 | -1.1193  | -1.4245  | -1.2507  |
| Q99622 | Protein C1(  | C12orf57 | C     | -1.62803 | -1.97679 | -0.6672  | -1.21613 | -1.53382 | -1.07861 | -1.69661 | -1.69188 | -0.81444 | -0.84093 |
| Q99623 | Prohibitin-  | PHB2     | BAP   | 0.299595 | 0.764652 | 0.54276  | 0.439912 | 0.47155  | 0.656046 | 0.585489 | 0.568306 | 0.517558 | 0.472082 |
| Q99627 | COP9 signa   | COPS8    | CSN   | -0.73816 | -0.05866 | 0.075588 | -0.69481 | -0.61163 | -0.18206 | -0.00437 | -0.18187 | -0.24997 | -0.03098 |
| Q99638 | Cell cycle c | RAD9A    |       | -3.75212 | -2.42286 | -3.04813 | -3.18453 | -2.99885 | -2.65208 | -2.48254 | -2.84859 | -2.99463 | -2.87454 |
| Q99700 | Ataxin-2 (S) | ATXN2    | ATX   | -0.02738 | 0.039173 | 0.506661 | 0.346548 | 0.211656 | 0.271677 | 0.213535 | 0.365922 | 0.420159 | 0.518256 |
| Q99704 | Docking pro  | DOK1     |       | -3.65493 | -3.6777  | -2.63417 | -3.33431 | -2.55552 | -4.04439 | -3.96963 | -3.88982 | -3.67243 | -4.0268  |
| Q99714 | 3-hydroxya   | HSD17B10 |       | 0.414517 | 0.374994 | 0.276712 | 0.485427 | 0.298954 | 0.624491 | 0.371409 | 0.324244 | 0.437461 | 0.342173 |
| Q99729 | Heterogen    | HNRNPAB  |       | 0.465491 | 0.754887 | 0.538479 | 0.54333  | 0.685489 | 0.153875 | 0.837683 | 0.71619  | 0.4824   | 1.055028 |
| Q99733 | Nucleosom    | NAP1L4   | NA    | -1.17204 | -1.42969 | -0.44857 | -0.46612 | -0.4634  | -0.44919 | -0.2799  | -0.53415 | -0.0803  | 0.233504 |
| Q99747 | Gamma-so     | NAPG     | SNAI  | -1.02549 | -0.78498 | 0.331249 | 0.407327 | 0.547737 | 0.332554 | 0.19299  | 0.118345 | 0.302234 | 0.295387 |
| Q99757 | Thioredoxi   | TXN2     | TRX2  | -0.05563 | 0.092439 | -0.24703 | -0.2339  | -0.25694 | -0.73063 | -0.46401 | -0.39267 | 0.166563 | 0.146501 |
| Q99759 | Mitogen-ac   | MAP3K3   | M     | -0.45666 | -0.3174  | -0.17246 | 0.062902 | -0.36892 | -0.46403 | -0.47088 | -1.00374 | -0.29716 | -0.32321 |
| Q99766 | ATP syntha   | DMAC2L   | A     | 1.099536 | 1.01744  | 1.015513 | 1.171318 | 0.822152 | 0.895185 | 0.843442 | 0.743819 | 1.306762 | 1.163024 |
| Q99767 | Amyloid-b    | APBA2    | MIN   | -2.32889 | -2.63154 | -2.47614 | -2.59706 | -2.12719 | -1.60604 | -1.73587 | -2.06959 | -1.38908 | -1.50133 |
| Q99795 | Cell surface | GPA33    |       | -1.02628 | -0.93609 | -0.66471 | -0.53365 | -0.75565 | -0.76162 | -0.41765 | -0.90168 | -0.88632 | -0.64686 |
| Q99798 | Aconitate    | ACO2     |       | -0.76327 | -0.58909 | -0.24471 | -0.40858 | -0.26962 | -0.04995 | -0.50362 | -0.37545 | 0.097284 | -0.24932 |
| Q99807 | 5-demetho    | COQ7     |       | -0.03063 | -0.04757 | -1.03154 | -1.11757 | -0.92749 | -1.22422 | -1.31937 | -1.26303 | -0.76553 | -0.43584 |
| Q99816 | Tumor susc   | TSG101   |       | 1.634613 | 1.668291 | 1.810693 | 1.397684 | 1.722015 | 1.514027 | 1.699652 | 1.419325 | 1.467126 | 1.448933 |
| Q99828 | Calcium an   | CIB1     | CIB   | -1.1751  | -1.06242 | -1.09288 | -0.82057 | -0.85068 | -0.72665 | -1.10811 | -0.97412 | -0.8495  | -0.93645 |
| Q99829 | Copine-1 (   | CPNE1    | CPN   | -0.31739 | -0.50901 | -0.90933 | -0.81051 | -0.46127 | -0.25828 | -0.03179 | -0.05625 | -0.3238  | -0.4624  |
| Q99832 | T-complex    | CCT7     | CCTH  | 1.010986 | 0.81693  | 0.546257 | 0.673006 | 0.524755 | 0.687058 | 0.622308 | 0.514603 | 0.868929 | 0.840199 |
| Q99836 | Myeloid di   | MYD88    |       | -0.06849 | 0.13193  | -0.07757 | -0.38745 | -0.48769 | -0.46571 | -0.09993 | -0.35937 | -0.45855 | -0.46682 |
| Q99848 | Probable r   | EBNA1BP2 |       | 0.121991 | -0.28345 | 0.49712  | 0.097024 | 0.416895 | 0.165059 | 0.39183  | 0.273468 | 0.415037 | 0.432632 |
| Q99873 | Protein arg  | PRMT1    | HM    | 1.640458 | 1.738914 | 1.612002 | 1.803766 | 1.616833 | 1.743508 | 1.746145 | 1.719688 | 1.88727  | 1.75718  |
| Q99933 | BAG family   | BAG1     | HAP   | -1.68497 | -1.59604 | -1.59591 | -1.91475 | -1.79764 | -1.91511 | -1.97859 | -1.85793 | -1.81169 | -1.52725 |

|        |                      |            |          |          |          |          |          |          |          |          |          |          |
|--------|----------------------|------------|----------|----------|----------|----------|----------|----------|----------|----------|----------|----------|
| Q99952 | Tyrosine- $\mu$      | PTPN18 BD  | -0.54416 | -0.26417 | 0.090735 | 0.037813 | -0.3359  | -0.42633 | 0.004124 | -0.02095 | 0.071362 | 0.011841 |
| Q99961 | Endophilin-          | SH3GL1 CN  | -0.64049 | -0.8189  | -0.6112  | -0.50161 | -0.48243 | -1.3224  | -0.50781 | -0.37223 | -0.46432 | -0.82517 |
| Q99986 | Serine/thre          | VRK1       | 0.26     | 0.396397 | 0.165586 | -0.20887 | 0.022139 | 0.217701 | -0.01543 | 0.182591 | 0.050951 | 0.243729 |
| Q99996 | A-kinase ar          | AKAP9 AKA  | -0.71491 | -0.36647 | -0.39696 | -0.39428 | -0.56649 | -0.27621 | -0.42531 | -0.25222 | -0.4245  | -0.21945 |
| Q9BPW8 | Protein Nip          | NIPSNAP1   | -0.15963 | -0.27813 | -0.59432 | -0.04635 | -0.12216 | 0.234727 | -0.21804 | 0.294138 | -0.10265 | -0.35164 |
| Q9BPX5 | Actin-relate         | ARPC5L     | 0.408963 | 0.697437 | 0.114636 | 0.108706 | 0.096414 | 0.023561 | -0.12832 | 0.335603 | -0.10257 | -0.05437 |
| Q9BPZ3 | Polyadenyl           | PAIP2 PAIP | -2.80735 | -2.48699 | NA       | NA       | -3.07635 | -2.75899 | NA       | NA       | -3.79796 | -3.0268  |
| Q9BQ04 | RNA-bindin           | RBM4B RBI  | -2.68536 | -2.13906 | -2.36146 | -1.59756 | -2.84503 | -2.87447 | -1.782   | -1.6735  | -1.7028  | -1.52855 |
| Q9BQ39 | ATP-depen            | DDX50      | -0.6002  | -0.27872 | -0.69849 | 0.067399 | -0.24236 | -0.52869 | -0.85415 | -0.78746 | -0.25739 | -0.78649 |
| Q9BQ52 | Zinc phospl          | ELAC2 HPC  | 0.097236 | 0.18649  | 0.534708 | 0.349267 | 0.575013 | 0.23173  | 0.292554 | 0.146841 | 0.210218 | 0.536968 |
| Q9BQ61 | Telomeras            | TRIR C19or | 0.027314 | -0.27872 | 0.130397 | 0.171318 | 0.312976 | -0.03317 | -0.33865 | -0.12553 | 0.360998 | 0.269657 |
| Q9BQ67 | Glutamate-           | GRWD1 GR   | -0.67535 | -0.80126 | -0.68961 | -0.73791 | -0.61266 | -0.45395 | -0.94018 | -1.22066 | -0.49874 | -0.34731 |
| Q9BQ69 | ADP-ribose           | MACROD1    | -2.98793 | -1.90202 | -1.33171 | -1.86821 | -2.59991 | -1.68684 | -1.41163 | -1.43812 | -1.67243 | -2.1589  |
| Q9BQA1 | Methylosol           | WDR77 ME   | -0.87245 | -0.73048 | -1.24598 | -0.95067 | -0.71727 | -0.9783  | -1.01027 | -0.6735  | -1.33852 | -0.71937 |
| Q9BQB6 | Vitamin K $\epsilon$ | VKORC1 VK  | -1.80735 | -2.26459 | -3.6734  | -4.84549 | -3.51245 | -3.0902  | -3.28157 | -4.39232 | -3.21299 | -3.1008  |
| Q9BQC6 | Ribosomal            | MRPL57 M   | 1.009064 | 0.890683 | 1.27919  | 1.247267 | 1.124601 | 1.019001 | 1.171061 | 1.315042 | 1.004707 | 1.180702 |
| Q9BQE3 | Tubulin alp          | TUBA1C TU  | 0.40439  | 0.345135 | 0.448758 | -0.11757 | 0        | 0.110424 | 0.02032  | 0.141661 | -0.37474 | -0.43584 |
| Q9BQE5 | Apolipopro           | APOL2      | -0.94062 | -1.01568 | -0.8519  | -1.02531 | -0.84503 | -0.26303 | -1.09516 | -1.27684 | -1.61353 | -1.73402 |
| Q9BQG0 | Myb-bindin           | MYBBP1A f  | -1.62986 | -1.79232 | -1.24598 | -1.8011  | -0.39046 | -1.26303 | -1.85462 | -1.58312 | -1.4245  | -1.41799 |
| Q9BQS8 | FYVE and c           | FYCO1 ZFY\ | -0.87174 | -1.11128 | -0.06886 | -0.30459 | -0.39542 | -0.18523 | -0.30356 | -0.19354 | -0.15301 | -0.23693 |
| Q9BRA2 | Thioredoxin          | TXNDC17 T  | -1.45187 | -0.83789 | -0.5427  | -0.72655 | -0.50188 | -0.25162 | -0.68834 | -0.62855 | -0.68753 | -0.56083 |
| Q9BRD0 | BUD13 hor            | BUD13      | -0.79859 | -0.88065 | -0.84473 | -0.68685 | -0.18213 | -0.58324 | -0.74494 | -0.50351 | -0.62674 | -0.53209 |
| Q9BRJ6 | Uncharacter          | C7orf50 FP | -0.05561 | 0.263034 | -0.42286 | -0.61667 | -0.51245 | -0.86449 | -0.26919 | -0.922   | -0.66493 | -0.3375  |
| Q9BRL6 | Serine/argi          | SRSF8 SFRS | -0.17372 | -0.50901 | 0.23017  | 0.193429 | -0.19903 | 0.005454 | -0.378   | -0.26992 | 0.073529 | 0.098355 |
| Q9BRP8 | Partner of `         | PYM1 PYM   | 0.675038 | 0.58756  | 0.737745 | 0.801968 | 0.753234 | 0.969626 | 0.352402 | 0.53842  | 0.808701 | 0.986662 |
| Q9BRQ0 | Pygopus hc           | PYGO2 PP7  | -1.34433 | -1.12751 | -1.15813 | -1.08695 | -0.78156 | -1.03019 | -1.49738 | -1.02338 | -0.88559 | -0.65297 |
| Q9BRQ6 | MICOS con            | CHCHD6 Cf  | -0.23661 | -0.45457 | 0.12683  | -0.16601 | -0.35199 | -0.26303 | -0.26303 | -0.59358 | -0.19669 | 0.056413 |
| Q9BRR6 | ADP-depen            | ADPGK PSE  | -2.81804 | -3.63906 | -2.08844 | -2.0126  | -2.74193 | -2       | -3.33867 | -2.78327 | -3.30998 | -3.88632 |
| Q9BRR9 | Rho GTPas            | ARHGAP9    | -0.51978 | -0.5541  | -0.41244 | -0.37588 | -0.55552 | -0.54455 | -0.32577 | -0.34066 | -0.74169 | -0.29047 |
| Q9BRS2 | Serine/thre          | RIOK1 RIO1 | -0.65641 | -0.50901 | 0.015513 | 0.108706 | -0.16528 | 0.090032 | -0.87276 | -0.87925 | 0.270089 | 0.31305  |
| Q9BRT2 | Ubiquinol-c          | UQCC2 C6c  | -1.56157 | -1.62345 | -1.42975 | -1.42934 | -1.73609 | -1.49001 | -1.13698 | -1.27825 | -1.21837 | -1.11228 |
| Q9BRT3 | Migration $\epsilon$ | MIEN1 C17  | -2.68536 | -3.24598 | -2.69849 | -2.89129 | -1.57755 | -3.58496 | -3.13955 | -4.07039 | -2.28011 | -2.13927 |
| Q9BRT6 | Protein LLP          | LLPH C12or | 1.693897 | 1.654733 | 1.910525 | 1.909397 | 1.925608 | 2.027068 | 1.776328 | 1.946048 | 2.142424 | 2.150121 |

|        |              |             |          |          |          |          |          |          |          |          |          |          |
|--------|--------------|-------------|----------|----------|----------|----------|----------|----------|----------|----------|----------|----------|
| Q9BRU9 | rRNA-proc    | UTP23 C8o   | -0.65641 | -1.5427  | -1.02359 | -0.51457 | -0.87199 | -0.89465 | -0.89162 | -0.922   | -1.1913  | -0.70487 |
| Q9BRV8 | Suppressor   | SIKE1 SIKE  | -1.03958 | -1.05041 | -0.90236 | -0.7505  | -1.04036 | -1.55817 | -0.72667 | -0.43148 | -0.8382  | -0.8044  |
| Q9BRZ2 | E3 ubiquiti  | TRIM56 RN   | -0.21534 | -0.29069 | -0.49665 | -0.31169 | -0.56649 | -1.23704 | -0.39613 | -0.57696 | -0.54678 | -0.44075 |
| Q9BS26 | Endoplasm    | ERP44 KIAF  | 0.293381 | 0.378721 | -0.43055 | -0.03366 | -0.29804 | -0.76706 | 0.051763 | -0.24302 | -0.50788 | -0.36822 |
| Q9BSB4 | Autophagy    | ATG101 C1   | -0.5285  | -0.59474 | -0.41244 | -0.2909  | -0.32379 | -0.57679 | -0.53222 | -0.83773 | -1.04793 | -0.54783 |
| Q9BSC4 | Nucleolar    | ç NOL10     | -1.72156 | -1.54597 | -2.22081 | -2.43063 | -1.93222 | -2.31314 | -0.47422 | -0.69188 | -2.02282 | -1.95733 |
| Q9BSD7 | Cancer-rel   | ç NTPCR C1o | 0.443257 | 0.628713 | 0.751707 | 0.7507   | -0.10007 | 0.194011 | -0.50293 | -0.68266 | 0.323813 | 0.232472 |
| Q9BSE5 | Agmatinas    | ç AGMAT     | 0.110807 | 0.151613 | -0.15634 | -0.15899 | -0.68105 | -0.1375  | -1.10613 | -1.18286 | 0.625255 | 0.239986 |
| Q9BSF4 | Mitochond    | TIMM29 c1   | 0.723568 | 0.625965 | 0.291986 | 0.268252 | 0.411314 | 0.184425 | 0.661349 | 0.061639 | -0.10257 | 0.435907 |
| Q9BSH5 | Haloacid d   | ç HDHD3 C9ç | 0.329184 | -0.10093 | -0.33662 | -0.38606 | -0.89947 | -0.2115  | -0.11718 | -0.33342 | -0.64268 | -0.2143  |
| Q9BSJ8 | Extended s   | ESYT1 FAM   | 0.52308  | 0.552937 | 0.742535 | 0.376359 | 0.621672 | 0.438385 | 0.533486 | 0.338081 | -0.11764 | -0.07843 |
| Q9BSL1 | Ubiquitin-a  | UBAC1 GBI   | -1.5675  | -1.80449 | -1.561   | -1.29057 | -1.75798 | -1.46897 | -1.34607 | -2.24603 | -1.69694 | -1.36022 |
| Q9BSQ5 | Cerebral ca  | CCM2 C7or   | -0.53727 | -0.68589 | -0.26459 | -0.18015 | -0.62263 | -0.31647 | -0.70492 | -0.35523 | -0.50919 | -0.56737 |
| Q9BSW2 | EF-hand ca   | CRACR2A E   | -0.82873 | -0.65486 | -0.64264 | -0.28325 | -0.1161  | -1.03317 | -1.08427 | -0.69188 | -0.83954 | -0.69768 |
| Q9BT09 | Protein car  | CNPY3 CTG   | 0.108696 | 0.034724 | 0.352533 | 0.283447 | 0.368521 | 0.178829 | 0.181524 | 0.121973 | 0.221118 | 0.371012 |
| Q9BT22 | Chitobiosyl  | ALG1 HMA    | 1.289938 | 1.405643 | 0.809317 | 0.753205 | 0.405504 | 0.5979   | 1.147298 | 0.548282 | -0.2618  | 0.063229 |
| Q9BT23 | LIM domai    | LIMD2 SB1   | -0.04184 | 0.400615 | -0.38686 | -0.2662  | -0.36674 | -0.32516 | -0.13639 | -0.04273 | -0.32501 | -0.16571 |
| Q9BT40 | Inositol pol | INPP5K PPç  | 1.807355 | 1.91983  | 0.665835 | 0.467393 | 0.508612 | 0.467359 | 0.808816 | 0.270648 | 0.273994 | 0.090064 |
| Q9BT78 | COP9 signa   | COPS4 CSN   | -0.11405 | 0.291986 | 0.210086 | 0.304257 | 0.3249   | 0.41913  | 0.085434 | 0.284815 | 0.285644 | 0.150071 |
| Q9BTA9 | WW domai     | WAC KIAA1   | 0.73928  | 1.078101 | 1.383867 | 1.476447 | 1.312284 | 1.350468 | 1.287464 | 1.20813  | 1.472215 | 1.446788 |
| Q9BTC0 | Death-indu   | DIDO1 C20   | -1.41908 | -1.41244 | -1.19285 | -1.20561 | -1.30556 | -1       | -1.30196 | -1.39357 | -0.93546 | -1.00888 |
| Q9BTD8 | RNA-bindin   | RBM42       | -1.25808 | -0.99178 | -1.65755 | -1.66921 | -1.4364  | -1.60701 | -1.39165 | -1.8649  | -1.3816  | -0.92413 |
| Q9BTE1 | Dynactin st  | DCTN5       | 1.121636 | 1.236924 | 1.258271 | 0.927761 | 1.300468 | 1.359107 | 0.999265 | 1.294817 | 1.501256 | 1.319422 |
| Q9BTE3 | Mini-chron   | MCMBP C1    | -0.67076 | -0.58656 | -0.58301 | -0.71621 | 0.006927 | -0.15135 | -0.9898  | -1.0115  | -0.9445  | -1.11991 |
| Q9BTE6 | Alanyl-tRN   | AARSD1      | -1.13586 | -1.21483 | -0.49231 | -0.71393 | -1.01472 | -1.27409 | -1.23769 | -1.20311 | -0.80596 | -0.96464 |
| Q9BTT0 | Acidic leuci | ANP32E      | -0.71505 | -0.74226 | -0.11982 | -0.29037 | -0.39257 | -1.07286 | -0.99598 | -1.56619 | -0.73378 | -0.14786 |
| Q9BTV4 | Transmeml    | TMEM43 U    | 0.334001 | 0.711793 | -0.72403 | -0.24558 | -0.55552 | -0.39334 | -0.63971 | -0.61973 | -0.38702 | -0.47221 |
| Q9BTW9 | Tubulin-sp   | ç TBCD KIAA | -1.03064 | -0.42206 | -0.49339 | -0.79911 | -0.80269 | -0.61613 | -0.67391 | -0.82251 | -0.66872 | -0.90987 |
| Q9BTY7 | Protein HG   | HGH1 C8or   | 0.131806 | -0.03386 | -0.87554 | -0.28077 | 0.017945 | 0.027955 | 0.010187 | 0.01573  | -0.24097 | -0.03488 |
| Q9BTZ2 | Dehydroge    | DHRS4 SDR   | 1.355481 | 1.053581 | 1.360402 | 1.356634 | 1.449936 | 1.092597 | 1.338207 | 1.159711 | 1.069042 | 1.209693 |
| Q9BU02 | Thiamine-t   | THTPA       | -0.74507 | -0.93147 | -0.84488 | -0.40255 | -0.7051  | -0.67807 | -0.97968 | -1.39232 | -0.43721 | -0.54137 |
| Q9BU23 | Lipase mat   | LMF2 TMEI   | 0.734612 | 0.489405 | 0.835724 | 0.747572 | 0.543402 | 0.714294 | 0.683876 | 0.722259 | 0.411401 | 0.243555 |
| Q9BU76 | Multiple m   | MMTAG2 C    | -1.64689 | -1.48699 | -1.35147 | -1.65567 | -1.53382 | -1.47454 | -1.42531 | -1.45372 | -1.20211 | -1.03585 |

|        |                        |          |          |          |          |          |          |          |          |          |          |
|--------|------------------------|----------|----------|----------|----------|----------|----------|----------|----------|----------|----------|
| Q9BUE0 | Mediator c MED18       | -1.94062 | -1.33171 | -1.53138 | -0.66558 | -1.19052 | -1.2115  | -1.68012 | -1.07039 | -0.97199 | -1.70487 |
| Q9BUE6 | Iron-sulfur ISCA1 HBL  | -1.60942 | -1.18265 | -0.94642 | -0.7794  | -0.92749 | -0.85457 | -0.58496 | -0.9886  | -0.74959 | -0.86491 |
| Q9BUH6 | Protein PA\ PAXX C9orf | -0.52749 | 0.037994 | -1.07244 | -1.42905 | -1.13427 | -1.4386  | -1.06818 | -1.24827 | -1.19922 | -1.01417 |
| Q9BUJ2 | Heterogen\ HNRNPUL1    | 0.711948 | 0.798076 | 0.744604 | 0.575262 | 0.695204 | 0.656517 | 0.593277 | 0.55961  | 0.696829 | 0.689729 |
| Q9BUK0 | Coiled-coil- CHCHD7    | -0.82873 | -1.2185  | -1.16506 | -1.45317 | -0.76702 | -0.84472 | -1.09516 | -0.90046 | -0.78978 | -0.80183 |
| Q9BUL8 | Programm\ PDCD10 CC    | -0.35497 | -0.13776 | -0.7287  | -0.57968 | -1.06075 | -0.80602 | -0.33351 | -0.38295 | -0.74577 | -0.48042 |
| Q9BUL9 | Ribonuclea RPP25       | -0.45867 | -0.39699 | -0.91701 | -0.79221 | -0.67228 | -0.80767 | -1.08179 | -0.81871 | -0.62051 | -0.48125 |
| Q9BUP3 | Oxidoreduc HTATIP2 CC  | -0.38702 | -0.33171 | -0.4021  | 0.073373 | -0.71727 | -0.43706 | -0.27537 | -0.6735  | -0.38702 | -0.51584 |
| Q9BUQ8 | Probable A DDX23       | 0.185849 | 0.342063 | 0.537237 | 0.287758 | 0.610001 | 0.439422 | 0.536173 | 0.518575 | 0.431481 | 0.664746 |
| Q9BUR4 | Telomeras\ WRAP53 TC   | -2.60942 | -1.6734  | -0.99222 | -0.73697 | -1.71727 | -1.47454 | -1.69661 | -2.07039 | -0.52268 | -1.31531 |
| Q9BUR5 | MICOS cor\ APOO FAM    | -1.666   | -1.84488 | -1.44392 | -1.40255 | -1.49139 | -1.81558 | -1.782   | -1.71049 | -1.76553 | -1.32636 |
| Q9BUT1 | 3-hydroxyl BDH2 DHR    | -0.90613 | -1.08017 | 0.087004 | -0.18015 | 0.330824 | 0.406817 | -0.11718 | 0.51056  | 0.078003 | -0.52218 |
| Q9BV20 | Methylthio MRI1 MRD    | -0.60942 | -0.75659 | -1.29834 | -0.85681 | -0.71727 | -0.67807 | -0.62385 | -1.04654 | -0.38087 | -0.35437 |
| Q9BV38 | WD repeat WDR18        | 0.756154 | 0.891624 | 0.293959 | 0.196031 | 0.397927 | 0.456074 | 0.529551 | 0.282446 | 0.970468 | 1.090645 |
| Q9BV40 | Vesicle-ass VAMP8      | 1.102277 | 0.980913 | 1.022947 | 0.86467  | 1.208312 | 1.135554 | 0.920378 | 1.013964 | 0.977337 | 0.745136 |
| Q9BV44 | THUMP do THUMPD3       | -1.87245 | -1.35147 | -0.53703 | -0.91475 | -0.63413 | -0.68684 | -0.66382 | -0.73888 | -0.7028  | -0.69052 |
| Q9BV57 | 1,2-dihydro ADI1 MTCB  | 1.006049 | 1.10343  | 0.298341 | 0.425973 | 0.570012 | 1.005454 | 0.543443 | 0.406424 | 1.204092 | 1.081724 |
| Q9BV68 | E3 ubiquitin RNF126    | -0.69515 | -0.7632  | -1.34156 | -1.03814 | -1.26006 | -1.75899 | -0.92038 | -1.39232 | -1.1913  | -0.90578 |
| Q9BV73 | Centrosom CEP250 CEI   | -1.44282 | -1.22645 | -1.2276  | -1.1087  | -0.32796 | -0.83798 | -1.25144 | -1.02609 | -1.27505 | -1.14014 |
| Q9BV79 | Enoyl-[acyl MECR NBR   | -2.80735 | -1.91667 | -1.03953 | -1.73697 | -2.69302 | -1.03317 | -1.23266 | -1.56789 | -1.07748 | -1.29345 |
| Q9BVC4 | Target of r\ MLST8 GBL | -3.00643 | -2.71373 | -2.59518 | -2.44925 | -2.56486 | -2.48237 | -2.83873 | -2.56036 | -1.41798 | -1.14297 |
| Q9BVC5 | Ashwin C2orf49         | 1.211091 | 1.468619 | 1.20502  | 1.193429 | 0.822152 | 0.977974 | 1.027867 | 1.069844 | 1.014075 | 1.194304 |
| Q9BVC6 | Transmeml TMEM109      | -0.69515 | -0.60064 | -1.44489 | -1.12214 | -2.37276 | -1.4783  | -1.7997  | -3.07039 | -3.39941 | -2.00888 |
| Q9BVG4 | Protein PBI PBDC1 CXo  | -0.65225 | -0.41635 | -1.18682 | -0.97328 | -1.60646 | -1.03356 | -0.99023 | -0.8444  | -1.13595 | -0.73771 |
| Q9BVI4 | Nucleolar c NOC4L      | 0.886542 | 0.978394 | 0.584963 | 0.64235  | 0.775127 | 0.944291 | 1.015267 | 1.058894 | 0.79518  | 1.203941 |
| Q9BVJ6 | U3 small nt UTP14A SD  | -0.06795 | -0.00717 | 0.017223 | -0.22047 | 0.128874 | 0.117661 | -0.03995 | 0.1349   | 0.321009 | 0.174876 |
| Q9BVK6 | Transmeml TMED9 GP     | -0.9523  | -1.09675 | -1.2185  | -0.4361  | -1.37109 | -0.76827 | -1.42439 | -0.84822 | -1.83112 | -1.44184 |
| Q9BVL2 | Nucleopori NUP58 KIA   | 0.396898 | 0.441167 | 0.881228 | 0.898115 | 0.992089 | 0.800185 | 0.612256 | 0.728153 | 0.684055 | 0.798766 |
| Q9BVL4 | Protein ad\ SELENOO S  | -1.03288 | -1.2305  | -1.35584 | -2.50049 | -1.63251 | -2.10231 | -1.35261 | -1.15041 | -2.45766 | -1.64856 |
| Q9BVM4 | Gamma-gl\ GGA2 A2L     | -2.66613 | -2.89216 | -2.29669 | -2.3274  | -1.56687 | -2.411   | -2.12941 | -1.59796 | -2.86303 | -3.3279  |
| Q9BVP2 | Guanine nt GNL3 E2IG   | -0.59208 | -0.41037 | -0.2382  | -0.40843 | -0.33179 | -0.48659 | -0.71368 | -0.46212 | -0.43721 | -0.36809 |
| Q9BVS4 | Serine/thre RIOK2 RIO  | -0.78629 | -1.14768 | -0.92405 | -1.24558 | -0.68105 | -0.77761 | -1.18536 | -1.63743 | -0.848   | -1.21945 |
| Q9BVS5 | tRNA (ader TRMT61B     | -3.08746 | -1.83094 | -0.52015 | -0.56009 | -0.48097 | -0.96758 | -0.63971 | -1.04654 | -1.05772 | -0.39453 |



|        |               |            |          |          |          |          |          |          |          |          |          |          |
|--------|---------------|------------|----------|----------|----------|----------|----------|----------|----------|----------|----------|----------|
| Q9BVT8 | Transmeml     | TMUB1 C7c  | 0.244734 | 0.259781 | 2.350497 | 1.082288 | 1.161638 | 0.490881 | 0.407343 | 0.167378 | 0.514102 | 1.192368 |
| Q9BW27 | Nuclear po    | NUP85 NUI  | -0.71491 | -0.78991 | -2.2167  | -2.38012 | -0.89947 | -1.1989  | -1.44152 | -1.50666 | -2.10778 | -1.79676 |
| Q9BW60 | Elongation    | ELOVL1 SSC | -1.25096 | -1.35147 | -1.7112  | -1.82312 | -3.07635 | -3.1375  | -1.96963 | -1.97728 | -3.00946 | -3.34873 |
| Q9BW61 | DET1- and     | DDA1 C19c  | -0.69006 | -0.06981 | -0.1041  | -0.02391 | -0.42289 | -0.40608 | 0.093718 | 0.13788  | -0.05203 | 0.307155 |
| Q9BW71 | HIRA-interc   | HIRIP3     | -0.38702 | -0.95395 | -0.30738 | -0.36167 | -0.26006 | -0.15565 | 0.050273 | -0.26303 | -0.07251 | -0.2143  |
| Q9BW85 | Splicing fac  | YJU2 CCDC  | 0.407459 | 0.637464 | -0.00521 | 0.051921 | 0.282523 | 0.324131 | 0.25267  | 0.095965 | 0.12357  | 0.10795  |
| Q9BWD1 | Acetyl-CoA    | ACAT2 ACT  | -0.20798 | -0.25565 | 0.627223 | 0.539816 | 0.49238  | 0.242311 | 0.953583 | 1.097403 | 0.973148 | 1.246068 |
| Q9BWF3 | RNA-bindin    | RBM4 RBM   | -0.75213 | -0.76276 | -0.29459 | -0.28486 | -0.32554 | -0.33843 | -0.59174 | -0.34728 | -0.27951 | -0.2643  |
| Q9BWH2 | FUN14 don     | FUNDC2 HC  | 0.213738 | -0.01888 | -0.35277 | -0.60456 | -0.52633 | -0.68895 | -0.43897 | -0.55987 | -0.63172 | -0.45222 |
| Q9BWJ5 | Splicing fac  | SF3B5 SF3E | 0.809384 | 0.927841 | 1.157495 | 0.872492 | 1.155392 | 1.164159 | 0.852252 | 1.096303 | 1.324135 | 1.358176 |
| Q9BWM7 | Sideroflexi   | SFXN3      | -0.02538 | -0.39026 | -0.61644 | -0.82156 | -0.76409 | -1.05746 | -0.67744 | -0.89754 | -1.08702 | -0.77074 |
| Q9BWS9 | Chitinase d   | CHID1 GLO  | 0.556393 | 0.58756  | 0.499286 | 0.674146 | 0.348454 | 0.369234 | 0.546949 | 0.270648 | 0.500835 | 0.487322 |
| Q9BWU0 | Kanadaptir    | SLC4A1AP I | -0.24377 | -0.07195 | 0.075949 | -0.23816 | 0.141554 | 0.23173  | 0.286713 | 0.192645 | 0.13493  | -0.0223  |
| Q9BWW4 | Single-strar  | SSBP3 SSDF | -0.5025  | -0.0039  | -1.10512 | -0.47045 | -0.21621 | -0.74977 | -0.57731 | -0.26303 | -0.83112 | -0.41209 |
| Q9BX40 | Protein LSM   | LSM14B C2  | -2.46855 | -1.93147 | -1.6734  | -1.59756 | -2.55552 | -1.65208 | -2.07346 | -1.848   | -2.10764 | -1.64829 |
| Q9BX68 | Histidine tr  | HINT2      | 1.331594 | 1.357362 | 0.790547 | 1.079322 | 1.31895  | 0.96123  | 1.198071 | 1.042311 | 1.17724  | 0.941291 |
| Q9BXI6 | TBC1 domc     | TBC1D10A   | 0.003037 | 0.21564  | 0.210086 | -0.00629 | 0.447251 | 0.321791 | 0.105561 | 0.058252 | 0.310377 | 0.304276 |
| Q9BXJ9 | N-alpha-ac    | NAA15 GA   | 0.26916  | 0.536574 | 0.036089 | 0.058903 | -0.01512 | 0.077256 | 0.144788 | -0.09303 | 0.142191 | 0.176777 |
| Q9BXK5 | Bcl-2-like p  | BCL2L13 M  | -1.14211 | -1.12516 | -0.72275 | -0.37195 | -1.09789 | -0.42147 | -0.89859 | -0.23873 | -0.99318 | -0.61901 |
| Q9BXL7 | Caspase re    | CARD11 CA  | -0.78131 | -1.13917 | -0.56103 | -0.68619 | -0.41009 | -0.59318 | -0.97016 | -0.86362 | -1.05302 | -0.61824 |
| Q9BXP5 | Serrate RN    | SRRT ARS2  | 0.523035 | 0.882246 | 1.112058 | 0.766421 | 0.796692 | 0.760711 | 0.733893 | 0.677218 | 1.297839 | 1.075438 |
| Q9BXS5 | AP-1 comp     | AP1M1 CLT  | 0.897421 | 1.074525 | 0.74418  | 0.559281 | 0.703297 | 0.73149  | 0.760829 | 0.569532 | 0.564664 | 0.59313  |
| Q9BXV9 | EKC/KEOPS     | GON7 C14c  | -2.6137  | -2.04543 | -0.87317 | -1.76178 | -1.22487 | -1.088   | -1.9301  | -1.48543 | -1.92661 | -1.69591 |
| Q9BXW7 | Haloacid d    | HDHD5 CEC  | -0.01444 | -0.0004  | 0.294558 | 0.497712 | 0.144227 | 0.225185 | 0.388164 | 0.182891 | -0.14586 | -0.20614 |
| Q9BY11 | Protein kin   | PACSIN1 KI | -1.34023 | -1.12199 | -1.2276  | -1.11757 | -0.85845 | -0.74061 | -2.13955 | -1.848   | -1.76553 | -1.84093 |
| Q9BY32 | Inosine triph | ITPA C20or | -1.05552 | -0.95599 | -0.59474 | -0.66558 | -0.31451 | -0.52869 | -0.46713 | -0.47743 | -0.30319 | -0.50324 |
| Q9BY42 | Replication   | RTF2 C20oi | 2.389428 | 2.213452 | 2.239282 | 1.909397 | 2.628906 | 2.440429 | 2.442591 | 2.516576 | 2.504163 | 2.132062 |
| Q9BY43 | Charged m     | CHMP4A C   | -0.2949  | -0.36647 | -0.05565 | 0.430447 | -0.10007 | -0.0902  | 0.122543 | -0.34066 | -0.53629 | 0.389364 |
| Q9BY44 | Eukaryotic    | EIF2A CDAC | 0.217579 | 0.03322  | 0.623117 | 0.574038 | 0.419332 | 0.606233 | 0.153634 | 0.290358 | 0.703765 | 0.60185  |
| Q9BY49 | Peroxisomc    | PECR SDR2  | -1.2949  | -0.96914 | -0.58887 | -0.72655 | -0.8055  | -0.70454 | -1.23266 | -1.0115  | -0.95361 | -1.44184 |
| Q9BY77 | Polymeras     | POLDIP3 KI | -0.42721 | -0.53703 | -0.53703 | -0.66558 | -0.39046 | -0.60977 | -0.69661 | -0.54265 | -0.43084 | -0.01334 |
| Q9BYB4 | Guanine nu    | GNB1L GY2  | -0.22948 | -0.21397 | -0.00782 | -0.59756 | -0.32379 | -0.35789 | -0.11165 | -0.05842 | -0.09248 | 0.419456 |
| Q9BYC8 | 39S ribosor   | MRPL32 HS  | -0.38333 | -0.59264 | -0.52717 | -0.22541 | -0.48595 | -0.41504 | -0.25817 | -0.39263 | -0.11679 | -0.41562 |

|        |                        |          |          |          |          |          |          |          |          |          |          |
|--------|------------------------|----------|----------|----------|----------|----------|----------|----------|----------|----------|----------|
| Q9BYD2 | 39S ribosom MRPL9      | 0.445032 | 0.295167 | 0.704633 | 0.780219 | 0.694708 | 0.514027 | 0.661349 | 0.61891  | 0.806007 | 0.67364  |
| Q9BYD3 | 39S ribosom MRPL4 CD   | -1.75821 | -1.30433 | -1.02664 | -1.3626  | -1.65783 | -1.04171 | -1.58333 | -0.84455 | -1.04118 | -0.81191 |
| Q9BYD6 | 39S ribosom MRPL1 BM   | -1.03684 | -0.81028 | -1.10512 | -0.9386  | -0.88567 | -0.88452 | -1.02061 | -0.79737 | -0.78978 | -0.73402 |
| Q9BYG3 | MKI67 FHA NIFK MKI67   | -0.14662 | -0.49246 | -0.03154 | -0.50564 | 0.328373 | 0.085183 | -0.28157 | -0.50967 | -0.38087 | -0.03585 |
| Q9BYK8 | Helicase wi HELZ2 KIAA | -0.90613 | -1.43335 | -0.90933 | -1.56009 | -1.26006 | -0.64351 | -0.84493 | -1.04654 | -1.4245  | -0.80183 |
| Q9BYM8 | RanBP-type RBCK1 C20   | -0.37519 | -0.63656 | 0.008028 | -0.01132 | 0.110133 | -0.10156 | -0.10224 | -0.27687 | 0.044882 | 0.114095 |
| Q9BYN8 | 28S ribosom MRPS26 C2  | 0        | -0.07605 | -0.09259 | -0.19444 | -0.00746 | -0.1375  | -0.00513 | 0.192645 | 0.17724  | -0.13441 |
| Q9BYV9 | Transcriptio BACH2     | -2.60942 | -1.46529 | -0.96153 | -0.47045 | -0.97056 | -1.07861 | -1.28157 | -1.2091  | -0.66493 | -0.84888 |
| Q9BYX4 | Interferon- IFIH1 MDA  | -3.98793 | -2.42286 | -2.44392 | -3.75803 | -1.74193 | -1.89465 | -2.07346 | -1.78746 | -2.32665 | -1.64829 |
| Q9BZ23 | Pantothena PANK2 C20   | -1.03448 | -0.93032 | -0.13401 | -0.24465 | -0.7076  | -0.54598 | -0.75815 | -1.07491 | -0.84196 | -0.61116 |
| Q9BZ29 | Dedicator c DOCK9 KIA  | -0.53086 | -0.31464 | -0.1704  | -0.19189 | -0.07637 | -0.09981 | -0.05859 | 0.049482 | -0.03267 | -0.04688 |
| Q9BZ67 | FERM dom FRMD8 FK      | -0.22948 | -0.32193 | -0.68589 | -1.17306 | -0.56649 | -1.0902  | -0.71329 | -0.69188 | -1.07748 | -0.97369 |
| Q9BZ95 | Histone-lys NSD3 WHS   | -0.38398 | -1.22685 | -0.3498  | -0.54217 | -1.32888 | -0.51739 | -0.6245  | -0.32897 | -0.39839 | -0.3038  |
| Q9BZD3 | Putative Gf GCOM2 GR   | -0.79418 | -0.63656 | -0.57043 | -1.00523 | -0.53809 | -0.76357 | -0.76819 | -0.75052 | -0.47724 | -0.41799 |
| Q9BZE4 | Nucleolar C GTPBP4 CR  | 0.02838  | 0.401123 | 0.323955 | -0.08552 | -0.06853 | -0.68684 | -0.73016 | -0.75811 | -1.00946 | -0.47221 |
| Q9BZE9 | Tether con ASPSCR1 A   | -0.22239 | 0.216811 | -0.50901 | -0.55834 | -0.33313 | -0.71348 | -0.60817 | -0.6642  | -0.43063 | -0.29888 |
| Q9BZF1 | Oxysterol-t OSBPL8 KIA | 0.309048 | 0.285772 | -0.00526 | 0.011633 | -0.09319 | -0.17095 | 0.126748 | -0.51154 | -0.32958 | -0.26445 |
| Q9BZG8 | 2-(3-amino DPH1 DPH    | -0.65641 | -0.19599 | -1.6531  | -1.61054 | -1.45837 | -1.98201 | -1.18269 | -1.71403 | -0.36864 | -0.40621 |
| Q9BZH6 | WD repeat WDR11 BR     | -1.13993 | -0.75659 | -0.96914 | -1       | -1.33313 | -1.33015 | -1       | -0.97728 | -1.13845 | -0.84888 |
| Q9BZI7 | Regulator c UPF3B REN  | 1.221067 | 1.248229 | 1.515224 | 1.140214 | 1.543526 | 1.494183 | 1.440704 | 1.417894 | 1.497987 | 1.393451 |
| Q9BZJ0 | Crooked ne CRNKL1 CR   | 0.433372 | 0.46537  | 0.473274 | 0.306486 | 0.506015 | 0.551685 | 0.442575 | 0.46671  | 0.422821 | 0.114225 |
| Q9BZK7 | F-box-like/ TBL1XR1 IR | -1.34794 | -1.0947  | 0.137504 | -0.25303 | 0.258068 | 0.053638 | 0.040358 | -0.1571  | -0.1913  | 0.052151 |
| Q9BZL1 | Ubiquitin-li UBL5      | -1.59104 | -1.64874 | -1.80346 | -1.47045 | -2.74193 | -1.56866 | -1.42531 | -1.86876 | -1.31487 | -1.76377 |
| Q9BZL4 | Protein pho PPP1R12C   | -1.60684 | -1.40826 | -1.6357  | -2.01996 | -1.00724 | -1.1658  | -1.3661  | -1.68762 | -2.26297 | -1.58481 |
| Q9BZL6 | Serine/thre PRKD2 PKD  | 0.053549 | -0.02359 | 0.155119 | -0.152   | 0.18799  | -0.18021 | 0.050273 | -0.11309 | 0.242458 | 0.382591 |
| Q9BZQ8 | Protein Nik NIBAN1 C1  | 0.32853  | 0.453551 | 0.196716 | 0.261888 | -0.29788 | -0.24349 | 0.045324 | -0.20243 | -0.83629 | -0.82935 |
| Q9BZV1 | UBX domai UBXN6 UB     | 0.142574 | 0.057427 | -0.04209 | 0.167254 | -3.35199 | -1.9783  | -0.00808 | -0.61203 | -1.38702 | -1.71937 |
| Q9BZZ5 | Apoptosis i API5 MIG8  | 0.221786 | 0.291986 | 0.12269  | 0.131233 | -0.08174 | 0.120513 | -0.00455 | 0.088809 | 0.144476 | 0.352657 |
| Q9C000 | NACHT, LRI NLRP1 CAR   | -0.77588 | -1.31221 | -0.7632  | -1.59756 | -1.49139 | -0.81558 | -0.63971 | -1.05842 | -0.66493 | -0.12473 |
| Q9C035 | Tripartite n TRIM5 RNF | -0.12663 | 0.061076 | -0.1305  | -0.08394 | -0.21621 | 0.032421 | -0.25691 | -0.36995 | -0.2687  | -0.08194 |
| Q9C0B0 | RING finger UNK KIAA1  | -2.39552 | -2.07121 | -2.06898 | -2.98751 | -2.23425 | -1.85039 | -3.14592 | -2.22319 | -1.86018 | -1.90607 |
| Q9C0B1 | Alpha-keto FTO KIAA1   | -1.30698 | -1.2066  | -1.07117 | -0.99151 | -1.04327 | -0.74692 | -0.97053 | -1.03234 | -0.99213 | -0.68936 |
| Q9C0C9 | (E3-indepe UBE2O KIA   | 0.218652 | 0.355407 | 0.682799 | 0.748476 | 0.84675  | 0.769387 | 0.786323 | 0.776114 | 0.851174 | 0.894458 |

|        |                         |          |          |          |          |          |          |          |          |          |          |
|--------|-------------------------|----------|----------|----------|----------|----------|----------|----------|----------|----------|----------|
| Q9C0D9 | Ethanolam SELENOI EF    | -0.43539 | -1.13906 | -1.19153 | 0.143195 | -0.71727 | -0.22422 | -0.53964 | 0.688056 | -0.71049 | -0.40036 |
| Q9C0E8 | Endoplasm LNPK KIAA     | -1.35566 | -1.10512 | -0.55984 | -1.89129 | -1.33313 | -0.39334 | -0.9301  | -1.09464 | -1.4245  | -1.20918 |
| Q9C0G0 | Zinc finger ZNF407 KIA  | -0.98793 | -0.87317 | -1.03906 | -0.50465 | -0.89535 | -1.31918 | -1.17206 | -2.07039 | -1.70035 | -1.46988 |
| Q9C0J8 | pre-mRNA WDR33 WI       | -0.69438 | -0.43622 | -1.17056 | -2.31177 | -1.70681 | -2.3979  | -1.74468 | -1.29823 | -2.23614 | -1.64595 |
| Q9C0K0 | B-cell lymph BCL11B CTI | -0.8913  | -0.97679 | -0.42071 | -0.41221 | -0.70855 | -0.2371  | -0.45628 | -0.56573 | -0.51829 | -0.29748 |
| Q9GZL7 | Ribosome l WDR12        | -2.37673 | -1.83683 | -0.38672 | -1.10402 | -0.79256 | -0.44448 | -1.87471 | -1.95134 | -1.80029 | -1.70617 |
| Q9GZM5 | Protein YIP YIPF3 C6orf | -0.68536 | -1.12199 | -0.69218 | 0.378512 | -0.74193 | -0.31647 | -1.01027 | 0.596367 | -0.65006 | -0.60054 |
| Q9GZP4 | PITH doma PITHD1 C1c    | -1.93464 | -1.7146  | -2.71853 | -1.99527 | -2.11702 | -1.71954 | -2.32079 | -2.06083 | -1.33049 | -1.46598 |
| Q9GZR1 | Sentrin-spe SENP6 KIAA  | 0.234465 | 0.213452 | 0.440162 | 0.791135 | 0.48755  | 0.398549 | 0.376148 | 0.36257  | 0.43958  | 0.631411 |
| Q9GZR2 | RNA exonu REXO4 PM      | -0.88359 | -1.07195 | -1.5656  | -1.71621 | -0.77973 | -1.23704 | -1.74723 | -1.22239 | -1.45003 | -1.55431 |
| Q9GZR7 | ATP-depen DDX24         | 0.260213 | 0.263298 | -0.01635 | -0.15309 | -0.03702 | -0.07976 | -0.09525 | -0.37471 | -0.32249 | 0.05152  |
| Q9GZS3 | WD repeat WDR61         | -0.32108 | -0.10248 | 0.003946 | 0.035286 | 0.28578  | 0.083554 | 0.008647 | 0.289567 | 0.613671 | 0.673477 |
| Q9GZT3 | SRA stem-l SLIRP C14o   | -1.25096 | -0.96153 | -1.06378 | -1.03814 | -1.24236 | -1.12553 | -1.11718 | -1       | -1.01898 | -0.75627 |
| Q9GZT8 | NIF3-like p NIF3L1 ALS  | -1.31017 | -0.91265 | -1.52314 | -1.33446 | -0.21206 | -0.01729 | -0.06124 | -0.05472 | -0.39231 | -0.483   |
| Q9GZT9 | Egl nine ho EGLN1 C1o   | 1.068078 | 0.972444 | 1.378512 | 1.296617 | 1.655116 | 1.319741 | 1.489805 | 1.315042 | 1.377423 | 1.316608 |
| Q9GZU8 | PSME3-intε PSME3IP1 (   | -1.98793 | -1.57719 | -1.81714 | -2.84549 | -2.95606 | -3.23704 | -2.18536 | -3.1193  | -1.78165 | -0.99118 |
| Q9GZY8 | Mitochond MFF C2orf3    | -2.85042 | -2.12199 | -1.62449 | -1.82312 | -1.84503 | -1.34395 | -1.63176 | -1.74846 | -1.52947 | -2.2402  |
| Q9GZZ1 | N-alpha-ac NAA50 MA     | 1.065184 | 1.11067  | 1.014057 | 1.096908 | 1.116584 | 1.268489 | 1.231136 | 1.33787  | 1.214287 | 1.102483 |
| Q9GZZ9 | Ubiquitin-li UBA5 UBE1  | -0.4783  | -0.61099 | -0.7211  | -0.54197 | -0.56151 | -0.33837 | -0.47067 | -0.30843 | -0.77157 | -0.62862 |
| Q9H000 | Probable E MKRN2 RN     | -4.19438 | -4.13906 | -2.44392 | -3.52356 | -3.51245 | -3.79647 | -3.61599 | -3.22239 | NA       | NA       |
| Q9H008 | Phospholy LHP           | 1.133088 | 1.253253 | -0.4021  | 0.439912 | 0.258068 | 1.308753 | 0.794139 | 0.36257  | 0.477322 | -0.27727 |
| Q9H019 | Mitochond MTFR1L FA     | -0.64117 | -0.46477 | -0.54624 | -0.77428 | -0.38407 | -0.41622 | -0.31382 | -0.40673 | -0.41531 | -0.17693 |
| Q9H078 | Caseinolyti CLPB HSP70  | -2.98793 | -1.60064 | -1.80346 | -1.82312 | -1.14048 | -1.44448 | -1.55459 | -1.36257 | -1.30319 | -1.63448 |
| Q9H081 | Protein MI MIS12        | -1.12663 | -0.6734  | -1.25526 | -1.24558 | -1.01495 | -1.2115  | -1.12832 | -0.76783 | -1.16993 | -0.53495 |
| Q9H098 | Protein FAI FAM107B C   | 0.562149 | 0.693869 | 1.174307 | 1.198901 | 1.053394 | 1.118908 | 1.084019 | 1.291115 | 1.187136 | 1.07293  |
| Q9H0A0 | RNA cytidir NAT10 ALP   | 0.254929 | 0.357362 | -0.06165 | 0.086241 | 0.256082 | 0.189226 | 0.200299 | 0.227291 | -0.21847 | -0.24544 |
| Q9H0B6 | Kinesin ligh KLC2       | -0.93622 | -0.90225 | -0.61094 | -1.07737 | -0.66041 | -0.56602 | -0.80644 | -1.03519 | -0.61117 | -0.69629 |
| Q9H0C8 | Integrin-lin ILKAP      | 0.902844 | 0.860936 | 0.90116  | 1.049328 | 0.867693 | 0.947128 | 0.968973 | 0.716207 | 1.044108 | 1.0649   |
| Q9H0D6 | 5'-3' exorib XRN2       | -0.13599 | 0.187397 | -0.1505  | 0.067399 | 0.087727 | 0.295741 | 0.032364 | 0.004135 | 0.036543 | -0.0711  |
| Q9H0E2 | Toll-interac TOLLIP     | -0.93339 | -1.03354 | -1.14068 | -1.00355 | -1.10027 | -0.88569 | -1.56903 | -1.64929 | -1.44903 | -1.16232 |
| Q9H0E3 | Histone de SAP130       | 0.77279  | 0.966019 | 1.175205 | 0.807327 | 1.175941 | 1.177553 | 1.046524 | 1.156205 | 1.45819  | 1.216648 |
| Q9H0E9 | Bromodom BRD8 SMAI      | -1.20832 | -0.18265 | 0.034673 | -0.02531 | 0.086588 | 0.19878  | 0.045324 | 0.088809 | -0.3932  | -0.26658 |
| Q9H0F6 | Sharpin (Sh SHARPIN SI  | -1.57289 | -1.78991 | -1.62449 | -1.63604 | -1.57755 | -1.58496 | -1.39808 | -1.10692 | -1.06756 | -1.22979 |

|        |              |            |          |           |          |          |          |          |          |          |          |          |
|--------|--------------|------------|----------|-----------|----------|----------|----------|----------|----------|----------|----------|----------|
| Q9H0G5 | Nuclear spe  | NSRP1 CCD  | -0.57289 | -1.17383  | -0.6672  | -0.64582 | -0.5231  | -0.91511 | -0.59266 | -0.56789 | -0.4119  | -0.38873 |
| Q9H0H0 | Integrator   | INTS2 KIAA | -0.34509 | -0.16745  | -0.21834 | -0.20327 | -0.18992 | -0.11668 | -0.33459 | -0.16731 | -0.25577 | -0.01965 |
| Q9H0L4 | Cleavage st  | CSTF2T KIA | -1.51737 | -1.26877  | -1.00782 | -1.30633 | -1.51245 | -1.41504 | -1.04152 | -1.26303 | -0.89984 | -0.97369 |
| Q9H0P0 | Cytosolic 5  | NT5C3A NT  | -3.30986 | -2.15634  | -1.87317 | -3.14505 | -3.2076  | -3.18641 | -2.18536 | -2.04654 | -1.78165 | -1.70487 |
| Q9H0R1 | AP-5 comp    | AP5M1 C14  | 0.727234 | 0.998049  | 0.695031 | 0.720564 | 0.83054  | 0.676705 | 0.808816 | 0.596367 | 0.556393 | 0.396106 |
| Q9H0R4 | Haloacid de  | HDHD2      | 0.007979 | 0.287874  | -0.72872 | -0.80004 | -0.52135 | -0.35901 | -0.64144 | -1.18629 | -0.40945 | -0.1513  |
| Q9H0S4 | Probable A   | DDX47      | -0.37126 | -0.24136  | -0.26459 | -0.51457 | -0.32379 | -0.17403 | -0.35165 | -0.63743 | -0.39941 | 0.03065  |
| Q9H0U4 | Ras-relatec  | RAB1B      | 1.688265 | 1.8927    | 0.850325 | 0.432074 | 0.327327 | 0.08383  | 0.645447 | 0.30408  | 0.291371 | 0.503031 |
| Q9H0U9 | Testis-spec  | TSPYL1 TSP | -0.47002 | -0.48076  | 0.084478 | -0.43563 | -0.17345 | -0.13082 | -0.33151 | -0.06389 | -0.11805 | 0.012142 |
| Q9H0W9 | Ester hydrc  | C11orf54 L | -0.02586 | -0.09087  | 0.431779 | 0.338617 | 0.560203 | 0.836587 | 0.300532 | 0.379584 | 0.69138  | 0.262577 |
| Q9H147 | Deoxynuclε   | DNTTIP1 C2 | -2.58488 | -2.46099  | -1.75012 | -2.18721 | -2.53079 | -1.97905 | -2.15527 | -2.10839 | -2.24638 | -1.49428 |
| Q9H1B7 | Probable E   | IRF2BPL C1 | -3.03684 | -4.44392  | -3.57719 | -2.75803 | -2.69302 | -4.1375  | NA       | NA       | -3.93546 | -1.92246 |
| Q9H1E3 | Nuclear ub   | NUCKS1 NL  | 0.530837 | 0.495229  | 0.133954 | 0.230087 | 0.181447 | 0.248919 | 0.110512 | -0.05601 | 0.194082 | 0.50772  |
| Q9H1E5 | Thioredoxin  | TMX4 KIAA  | -0.24747 | -0.15794  | -1.13743 | -1.08949 | -1.24861 | -1.8816  | -0.72368 | -1.17761 | -1.52908 | -1.66393 |
| Q9H1I8 | Activating s | ASCC2 ASC  | -1.13278 | -0.99257  | -1.09991 | -0.96844 | -0.79175 | -1.37649 | -0.2177  | 0.130866 | -1.58076 | -1.05241 |
| Q9H1J1 | Regulator c  | UPF3A REN  | -0.31739 | -0.39696  | -0.4814  | -0.84356 | -1.57708 | -1.6881  | -1.49512 | -0.99828 | -0.6943  | -0.70239 |
| Q9H1K1 | Iron-sulfur  | ISCU NIFUN | 0.160465 | 0.462972  | 0.310969 | 0.067399 | 0.84717  | 0.703799 | 0.584963 | 0.581141 | 1.244449 | 0.833666 |
| Q9H1Y0 | Autophagy    | ATG5 APGE  | -0.07464 | 0.042266  | 0.23763  | 0.245872 | 0.479165 | 0.495682 | 0.284736 | 0.289567 | 0.160465 | 0.155098 |
| Q9H223 | EH domain    | EHD4 HCAJ  | -1.19438 | -0.95395  | -1.08017 | -1.23606 | -1.09212 | -1.04439 | -1.31937 | -1.13179 | -1.51592 | -1.05411 |
| Q9H269 | Vacuolar pi  | VPS16      | 1.381307 | 1.36192   | 1.427171 | 1.428306 | 1.362983 | 1.642106 | 1.350297 | 1.369234 | 1.360998 | 1.510807 |
| Q9H270 | Vacuolar pi  | VPS11 RNF  | -1.74557 | -1.62548  | -1.53098 | -1.49197 | -0.90725 | -1.08125 | -0.86451 | -1.18281 | -0.90309 | -0.61885 |
| Q9H299 | SH3 domai    | SH3BGRL3   | -0.09392 | 0.279079  | -0.79412 | -0.34756 | -0.51128 | -0.82526 | -0.60817 | -0.64764 | -0.86046 | -0.63507 |
| Q9H2G2 | STE20-like   | SLK KIAA02 | -0.69046 | -0.7492   | -0.69391 | -0.58102 | -0.47167 | -0.4241  | -0.67394 | -0.36802 | -0.83283 | -0.66678 |
| Q9H2G4 | Testis-spec  | TSPYL2 CD7 | 0.187331 | 0.11967   | 0.360402 | 0.108706 | 0.492844 | 0.435386 | 0.434096 | 0.389042 | 0.285644 | 0.767616 |
| Q9H2H8 | Peptidyl-pr  | PPIL3      | -0.10616 | -8.43E-05 | 0.599726 | 0.53461  | 1.14053  | 0.864741 | -0.56484 | -1.03477 | 0.586307 | 0.686841 |
| Q9H2J4 | Phosducin-   | PDCL3 PhLI | -2.98793 | -2.0834   | -2.66149 | -2.35721 | -2.85399 | -2.82917 | -2.30933 | -1.31449 | -1.70525 | -2.19172 |
| Q9H2K0 | Translation  | MTIF3 DC3  | 1.541894 | 1.465798  | 1.721284 | 1.57447  | 1.768594 | 1.575826 | 1.78229  | 1.717948 | 1.628309 | 1.601099 |
| Q9H2K8 | Serine/thre  | TAOK3 DPK  | -0.35767 | -0.25801  | -0.63981 | -0.76773 | -0.53381 | -0.59184 | -0.35495 | -0.55603 | -0.49627 | -0.5444  |
| Q9H2M9 | Rab3 GTPa    | RAB3GAP2   | -0.42986 | -0.58656  | -0.11041 | -0.46549 | -0.81355 | -0.37307 | -0.68041 | -0.53442 | -0.47156 | -0.39238 |
| Q9H2P0 | Activity-dep | ADNP ADN   | 0.206634 | 0.261757  | -0.19623 | 0.257935 | 0.093462 | 0.137175 | 0.431166 | 0.11367  | 0.352313 | -0.00425 |
| Q9H2U1 | ATP-depen    | DHX36 DD7  | -1.1669  | -1.20945  | -1.18265 | -1.0126  | -0.95606 | -1.66935 | -1.22069 | -1.76783 | -0.97199 | -0.7713  |
| Q9H2U2 | Inorganic p  | PPA2 HSPC  | -0.0899  | -0.01071  | -0.28345 | 0.031249 | -0.83173 | -0.08439 | 0.034501 | 0.259042 | 0.281771 | 0.262297 |
| Q9H2W6 | 39S ribosor  | MRPL46 C1  | 0.338802 | 0.534708  | 0.921889 | 1.503238 | 0.614406 | 0.868495 | 0.536406 | 0.344648 | 0.556393 | -0.00443 |

|        |                        |          |          |          |          |          |          |          |          |          |          |
|--------|------------------------|----------|----------|----------|----------|----------|----------|----------|----------|----------|----------|
| Q9H307 | Pinin (140 IPNN DRS IV | 0.612977 | 0.675633 | 0.856636 | 0.791135 | 0.981288 | 0.539144 | 0.383925 | 0.85561  | 0.857585 | 0.740483 |
| Q9H330 | Transmeml TMEM245      | 0.802748 | 1.052925 | 0.604774 | 0.846075 | 0.3759   | 0.013778 | 0.929745 | 0.671178 | 0.027955 | 0.27832  |
| Q9H334 | Forkhead b FOXP1 HSP   | -1.25096 | -0.8519  | -0.53703 | -0.82312 | -0.36965 | -0.28451 | -0.73201 | -0.61641 | -0.47603 | -0.44786 |
| Q9H3K2 | Growth ho GHITM DEF    | 1.152306 | 0.815132 | 0.448758 | 0.363963 | 0.306978 | 0.402689 | 0.749192 | 0.719688 | 0.460289 | -0.1008  |
| Q9H3K6 | Bola-like p BOLA2 BOL  | 1.178473 | 1.325356 | 1.199399 | 1.140034 | 1.075379 | 1.029886 | 0.906169 | 0.906978 | 1.4756   | 1.291579 |
| Q9H3N1 | Thioredoxi TMX1 TMX    | 0.067728 | 0.09299  | -0.25256 | -0.63026 | -0.72765 | -0.43044 | -0.46739 | -0.54834 | -0.78528 | -0.98839 |
| Q9H3P2 | Negative el NELFA WH   | -0.5025  | -0.53138 | -0.79765 | -0.76109 | -0.22487 | -0.40054 | -0.74723 | -0.87852 | -0.54314 | -0.0223  |
| Q9H3P7 | Golgi resid ACBD3 GCF  | 0.361333 | 0.353913 | -0.26696 | -0.42164 | -0.23276 | -0.4057  | -0.3762  | -0.41109 | -0.40884 | -0.20308 |
| Q9H3S4 | Thiamin py TPK1        | -0.89623 | -0.75254 | -2.86041 | -1.87467 | -1.43054 | -0.91038 | -1.1777  | -2.12016 | -1.06689 | -1.58548 |
| Q9H3S7 | Tyrosine-p PTPN23 KIA  | -0.99673 | -0.63462 | -0.66827 | -0.95509 | -0.90054 | -0.44893 | -0.90323 | -0.87274 | -0.64637 | -1.01305 |
| Q9H3U1 | Protein unc UNC45A SM  | -0.37126 | -0.57138 | -0.13478 | 0.334419 | 0.114333 | -0.34395 | -0.0574  | -0.39985 | -0.26303 | 0.170908 |
| Q9H3Z4 | DnaJ homo DNAJC5 CL    | 1.713747 | 1.677186 | 1.087912 | 1.545638 | 0.98571  | 1.953325 | 1.555424 | 1.787508 | 0.514415 | 0.418807 |
| Q9H400 | Lck-interac LIME1 LIM  | -3.57289 | -2.44392 | -1.18265 | -2.75803 | -1.87199 | -1.65208 | -1.9898  | -1.56789 | -2.00946 | -1.46609 |
| Q9H410 | Kinetochor DSN1 C20o   | -0.37912 | -0.45457 | -0.37656 | -0.26053 | -0.269   | -0.23061 | -0.46713 | -0.41504 | -0.08246 | -0.29888 |
| Q9H444 | Charged m CHMP4B C     | -0.1526  | -0.23733 | 0.190561 | -0.02449 | -0.01386 | -0.30489 | -0.15952 | -0.13243 | 0.164869 | -0.14866 |
| Q9H4A3 | Serine/thre WNK1 HSN   | -0.35618 | -0.13118 | 0.199938 | 0.333921 | -0.24548 | -0.11958 | 0.209313 | -0.0115  | 0.018737 | 0.052151 |
| Q9H4A4 | Aminopept RNPEP APB    | -0.1959  | 0.119184 | -0.34459 | -0.56931 | -0.27768 | -0.41593 | -0.18636 | -0.39993 | -0.43148 | -0.06436 |
| Q9H4A5 | Golgi phos GOLPH3L C   | -2.76553 | -2.34156 | -1.94642 | -1.26053 | -1.35199 | -2       | -1.87276 | -3.72935 | -2.21299 | -2.06333 |
| Q9H4A6 | Golgi phos GOLPH3 GF   | -0.1004  | -0.22304 | -0.51457 | -0.64582 | -0.6574  | -0.39334 | -0.9026  | -1.10507 | -0.78978 | -0.3431  |
| Q9H4E7 | Differential DEF6 IBP  | 0.569436 | 0.551851 | 0.365861 | 0.317013 | 0.371631 | 0.24401  | 0.410472 | 0.236516 | 0.140201 | -0.04137 |
| Q9H4G4 | Golgi-assoc GLIPR2 C9c | -1.31693 | -1.21927 | -1.25959 | -1.19753 | -1.17326 | -1.28654 | -1.43208 | -1.29187 | -1.50374 | -1.98658 |
| Q9H4L5 | Oxysterol-k OSBPL3 KIA | -0.73724 | -0.94932 | -0.45999 | -0.47974 | -0.34883 | -0.39217 | -0.50911 | -0.69566 | -1.11179 | -1.21433 |
| Q9H4L7 | SWI/SNF-r SMARCAD1     | -0.2949  | -0.30738 | -0.44923 | -0.27563 | -0.40024 | -0.27621 | -0.46007 | -0.43812 | -0.55695 | -0.30433 |
| Q9H4M9 | EH domain EHD1 PAST    | 0.893085 | 1.205274 | 0.882246 | 1.102877 | 0.981288 | 1        | 1.146079 | 1.172467 | 0.787006 | 0.860725 |
| Q9H4X1 | Regulator c RGCC C13o  | -3.25096 | -2.19153 | -2.48699 | -1.61667 | -2.59991 | -3.65208 | -3.96963 | -3.16993 | -3.30319 | -2.21945 |
| Q9H4Z3 | mRNA (2'-C PCIF1 C20c  | 0.734313 | 0.768615 | 0.46392  | 0.157191 | 0.545655 | 0.555442 | 0.435034 | 0.425378 | 0.537013 | 0.174749 |
| Q9H501 | ESF1 homo ESF1 ABTAI   | -1.44081 | -1.53891 | -1.45196 | -0.85431 | -1.22059 | -1.45103 | -1.13788 | -1.02027 | -1.02142 | -0.71475 |
| Q9H583 | HEAT repe HEATR1 BA    | -1.59104 | -2.28345 | -1.52015 | -1.5787  | -1.84503 | -1.85457 | -1.87276 | -1.78746 | -1.55695 | -1.56737 |
| Q9H5N1 | Rab GTPas RABEP2 RA    | -1.2949  | -1.43335 | -2.25926 | -2.39204 | -1.94036 | -2.05058 | -1.76023 | -2.55141 | -1.60693 | -2.244   |
| Q9H6A0 | DENN dom DENND2D       | -2.2075  | -1.825   | -1.60805 | -1.58175 | -1.16444 | -1.11443 | -0.39541 | -1.24897 | -1.08123 | -0.81703 |
| Q9H6F5 | Coiled-coil CCDC86 CY  | -0.73923 | -0.6656  | -0.91878 | -1.12955 | -0.46091 | -0.52831 | -0.52388 | -1.1888  | -1.2393  | -0.61067 |
| Q9H6K4 | Optic atrop OPA3       | -3.13993 | -2.07195 | -1.83094 | -2.98751 | -2.89947 | -1.26303 | -1.60039 | -1.63743 | -1.55695 | -1.71937 |
| Q9H6R4 | Nucleolar r NOL6       | -0.20133 | -0.2276  | -0.93147 | -1.71621 | -0.68105 | -0.4975  | -1.09516 | -0.78746 | -0.59918 | -0.69768 |

|        |                         |          |          |          |          |          |          |          |          |          |          |
|--------|-------------------------|----------|----------|----------|----------|----------|----------|----------|----------|----------|----------|
| Q9H6S0 | 3'-5' RNA h YTHDC2      | -1.04933 | -1.24598 | -1.52015 | -1.41923 | -1.14048 | -1.27621 | -1.45305 | -1.34792 | -1.4119  | -1.41799 |
| Q9H6S1 | 5-azacytidin AZI2 NAP1  | -1.26546 | 0.210086 | -0.62449 | 0.043253 | -0.07635 | 0.037755 | -0.5697  | -0.40742 | -0.35652 | -0.69052 |
| Q9H6S3 | Epidermal j EPS8L2 EPS  | -4.30986 | -2.19153 | -3.20945 | -3.32193 | NA       | NA       | NA       | NA       | -3.79796 | -3.76377 |
| Q9H6T3 | RNA polym RPAP3         | -0.5025  | -0.487   | -0.39165 | -0.12486 | -0.28774 | -0.24717 | -0.22845 | -0.5856  | -0.07786 | -0.03979 |
| Q9H6U6 | Breast carc BCAS3       | 0.088176 | -0.01568 | 0.451612 | 0.252542 | 0.619256 | 0.415037 | 0.278301 | 0.110183 | 0.477322 | 0.422761 |
| Q9H6W3 | Ribosomal RIOX1 C14     | -0.60251 | -0.62    | -2.21918 | -1.34988 | -1.63915 | -1.1532  | -0.72259 | -1.03481 | -2.02046 | -1.44641 |
| Q9H6Y2 | WD repeat WDR55         | 0.4932   | 0.381508 | 0.148099 | 0.037153 | -0.04532 | 0.105353 | -0.08427 | 0.136462 | 0.494156 | 0.665292 |
| Q9H6Y7 | E3 ubiquitin RNF167 LP  | -1.96408 | -1.72403 | -2.07195 | -3.38606 | -3.35199 | -2.72247 | -1.91073 | -3.16993 | -3.61353 | -2.39453 |
| Q9H6Z4 | Ran-binding RANBP3      | -0.9523  | -1.07477 | -1.36146 | -1       | -1.37109 | -1.39982 | -1.34514 | -1.60297 | -1.2687  | -1.12065 |
| Q9H773 | dCTP pyroç DCTPP1 XT    | -3.25096 | -2.38163 | -1.88753 | -1.61667 | -3.35199 | -2.95693 | -1.96963 | -3.72935 | -3.86507 | -2.11991 |
| Q9H7C9 | Mth938 do AAMDC C1      | 0.698505 | 1.04341  | -0.39205 | -0.48387 | -0.16821 | -0.43111 | -0.24478 | -0.66329 | 0.02192  | -0.32317 |
| Q9H7D7 | WD repeat WDR26 CD      | -1.28011 | -1.03154 | -1.6734  | -1.98751 | -2.59991 | -1.85457 | -1.68012 | -1.63743 | -1.25739 | -1.54137 |
| Q9H7J1 | Protein phç PPP1R3E     | -0.63617 | -0.65343 | -1.11006 | -0.67797 | -0.87598 | -1.06761 | -0.71265 | -1.38577 | -0.67962 | -0.73218 |
| Q9H7L9 | Sin3 histon SUDS3 SAP   | -0.89482 | -0.90933 | -0.35147 | -0.47045 | -0.62263 | -0.26961 | -0.46007 | -0.88982 | -0.46297 | -0.28434 |
| Q9H7M9 | V-type imr VSIR C10r    | -1.32496 | -0.95395 | -0.61849 | -0.36167 | -1.27798 | -0.91511 | -0.03626 | -0.16993 | -1.13845 | -1.08194 |
| Q9H7N4 | Splicing fac SCAF1 SFR  | -2.64689 | -1.4761  | -1.11806 | -1.10428 | -1.20027 | -1.44287 | -1.28211 | -1.50666 | -1.07748 | -1.80957 |
| Q9H7X3 | Zinc finger ZNF696      | -1.96408 | -1.90202 | -3.62449 | -3.32193 | -2.79256 | -3.65208 | -1.74723 | -1.72935 | -3.04793 | -2.00888 |
| Q9H7Z3 | Nuclear exc NRDE2 C14   | -3.89482 | -4.94642 | -4.13906 | -3.45317 | -4.01495 | -3.34395 | -4.55459 | -3.88982 | NA       | NA       |
| Q9H7Z7 | Prostaglanç PTGES2 C9   | 0.337838 | 0.471261 | 0.176068 | 0.159249 | 0.183649 | 0.45328  | 0.556104 | 0.421006 | -0.14821 | -0.21163 |
| Q9H814 | Phosphoryl PHAX RNU     | 0.073616 | -0.03769 | -0.18838 | -0.16687 | 0.230642 | 0.335043 | 0.145658 | 0.146925 | 0.050707 | -0.11972 |
| Q9H832 | Ubiquitin-c UBE2Z HOY   | -1.09219 | -0.63963 | -0.64484 | -0.8484  | -1.24537 | -0.75315 | -0.66894 | -0.946   | -0.92636 | -0.41432 |
| Q9H845 | Complex I ç ACAD9       | 0.159322 | 0.320651 | 0.274275 | 0.170791 | 0.081898 | 0.531525 | 0.215233 | 0.382856 | -0.03812 | 0.211381 |
| Q9H869 | YY1-associç YY1AP1 HC   | -2.85042 | -3.72403 | -3.4021  | -3.59756 | -3.07635 | -3.23704 | -3.89162 | -3.33342 | -3.93546 | -3.8893  |
| Q9H8H0 | Nucleolar ç NOL11 L14   | -1.22225 | -1.1187  | -0.98449 | -0.90886 | -1.16531 | -1.33507 | -1.17631 | -0.94922 | -1.22772 | -0.86291 |
| Q9H8H2 | Probable A DDX31        | -2.94062 | -2.24598 | -1.44392 | -3.0906  | -1.45017 | -1.41504 | -1.83577 | -1.2091  | -1.54314 | -1.45391 |
| Q9H8H3 | Methyltran METTL7A P    | 1.402098 | 1.562696 | 0.871631 | 0.812721 | 0.923649 | 0.775785 | 0.926538 | 0.807355 | 0.776035 | 0.738735 |
| Q9H8U3 | AN1-type z ZFAND3 TE    | -0.36344 | -1.04757 | -0.48153 | -0.64582 | -0.53382 | -0.51301 | -0.782   | -0.34792 | -0.38702 | -0.69768 |
| Q9H8W4 | Pleckstrin ç PLEKHF2 Zf | 0.005733 | -0.02956 | -0.87317 | -1.18728 | -1.06075 | -1.50524 | -1.05209 | -1.6735  | -1.3505  | -1.49075 |
| Q9H8Y5 | Ankyrin reç ANKZF1 ZN   | -2.98793 | -3.88753 | -2.08844 | -3.84549 | -4.42999 | -3.1375  | -3.68012 | -3.80735 | -3.16993 | -2.51584 |
| Q9H8Y8 | Golgi reass GORASP2 C   | -0.55168 | -0.73119 | -0.19999 | -0.02834 | -0.38273 | -0.55094 | -0.42767 | -0.36921 | -0.48722 | -0.23969 |
| Q9H910 | Jupiter mic JPT2 C16or  | -1.11898 | -0.87148 | -0.84724 | -1.15554 | -0.91109 | -0.95147 | -1.19816 | -0.85254 | -0.81639 | -0.68563 |
| Q9H930 | Nuclear bo SP140L       | -1.39341 | -1.35646 | -0.9269  | -0.83909 | -1.0495  | -0.78809 | -1.34297 | -0.89679 | -0.97246 | -0.64271 |
| Q9H936 | Mitochond SLC25A22 C    | -2.91918 | -2.33442 | -2.15206 | -2.22034 | -3.57772 | -1.98915 | -2.07411 | -2.27791 | -2.02473 | -2.61188 |

|        |                                  |          |          |          |          |          |          |          |          |          |          |
|--------|----------------------------------|----------|----------|----------|----------|----------|----------|----------|----------|----------|----------|
| Q9H939 | Proline-ser PSTPIP2              | 0.3541   | 0.295251 | 0.526846 | 0.584762 | 0.532602 | 0.415358 | 0.610045 | 0.27461  | 0.672937 | 0.62226  |
| Q9H993 | Damage-cc ARMT1 C6c              | 0.719892 | 0.558731 | 1.179425 | 2.272153 | 2.221861 | 1.555519 | 1.677432 | 1.911463 | 0.959358 | 1.017594 |
| Q9H9A5 | CCR4-NOT CNOT10                  | -0.36344 | -0.16506 | -0.64928 | -0.33578 | -0.03006 | -0.20519 | -0.38466 | -0.06439 | 0.108934 | 0.039289 |
| Q9H9A6 | Leucine-ric LRRC40               | -0.32972 | -0.16658 | -0.52924 | -0.43634 | -0.22871 | -0.15281 | -0.31615 | -0.38162 | -0.29892 | -0.16217 |
| Q9H9B1 | Histone-lys EHMT1 EUI            | -0.88359 | -1.45457 | -0.91667 | -1.10402 | -0.91341 | -0.73151 | -1.64026 | -1.93041 | -0.44361 | -1.1589  |
| Q9H9B4 | Sideroflexin SFXN1               | 0.488887 | 0.326868 | 0.216811 | 0.586712 | 0.18799  | 0.588601 | 0.131912 | 0.152003 | -0.37474 | -0.46609 |
| Q9H9E3 | Conserved COG4                   | -1.34286 | -0.86741 | -0.98507 | -0.80829 | -1.19766 | -0.72891 | -0.87921 | -1.16717 | -0.99134 | -0.82661 |
| Q9H9J2 | 39S ribosom MRPL44               | -0.411   | -1       | -0.79667 | -0.92663 | -0.8055  | -0.60977 | -0.22069 | -1.14439 | -2.43546 | -2.34172 |
| Q9H9L3 | Interferon- ISG20L2 HS           | -1.59463 | -1.0362  | -2.00476 | -1.65014 | -1.78729 | -1.57277 | -1.79477 | -1.84067 | -1.55962 | -1.31661 |
| Q9H9L4 | KAT8 regul KANSL2 C1             | -2.49396 | -2.50374 | -2.26156 | -1.62402 | -2.28934 | -1.911   | -0.67195 | -0.75811 | -2.09502 | -2.10657 |
| Q9H9P8 | L-2-hydroxyl L2HGDH C1           | -0.70499 | -0.25992 | -1.39183 | -1.05107 | -2.74193 | -0.52869 | -0.94973 | -3.1193  | -0.58496 | -0.64137 |
| Q9H9Q2 | COP9 signa COPS7B CS             | 0.176645 | 0.638544 | -0.49795 | -0.85916 | -0.5488  | -0.73857 | -0.73185 | -0.55393 | -0.43287 | -0.15389 |
| Q9H9Q4 | Non-homolog NHEJ1 XLF            | -0.656   | -0.58229 | -0.75724 | -0.69421 | -0.64132 | -1.01114 | -1.11735 | -0.8794  | -0.68371 | -0.54067 |
| Q9H9Y2 | Ribosome p RPF1 BXDC             | -0.34947 | -0.61713 | -0.27479 | -0.49147 | -0.23075 | -0.11545 | -0.24018 | -0.30511 | -0.1064  | -0.01083 |
| Q9HA64 | Ketosaminin FN3KRP               | 1.141356 | 1.241758 | 0.890683 | 1.126054 | 1.526792 | 1.908347 | 1.776328 | 1.622633 | 1.40617  | 1.241859 |
| Q9HA65 | TBC1 domain TBC1D17              | -0.59463 | -0.17123 | -0.75265 | -0.80325 | -0.71293 | -0.69863 | -0.29674 | -0.54434 | -0.90673 | -0.70644 |
| Q9HA77 | Probable cyto CARS2 OK/          | 0.176645 | 0.23349  | 0.623437 | 0.568138 | 0.220266 | 0.326293 | 0.797087 | 0.790904 | 0.874469 | 0.751934 |
| Q9HAB8 | Phosphoprotein PPCS COAB         | 0.501787 | 0.597902 | 0.90116  | 0.15451  | 0.559958 | 0.189226 | 0.5115   | 0.237039 | 0.546743 | 0.785698 |
| Q9HAF1 | Chromatin MEAF6 C1c              | 0.462734 | 0.381508 | 0.59274  | 0.646363 | 0.879867 | 0.690316 | 0.677432 | 0.561879 | 0.929964 | 0.945893 |
| Q9HAJ7 | Histone deacetylase SAP30L NS    | 0.285091 | 0.558731 | -0.49796 | -0.0906  | -0.05302 | -0.40777 | -0.11165 | -0.2091  | -0.12296 | 0.368948 |
| Q9HAU5 | Regulator of UPF2 KIAA           | -0.06426 | 0.053786 | 0.403777 | 0.405429 | 0.282134 | 0.34253  | 0.163188 | 0.398021 | 0.480392 | 0.564009 |
| Q9HAV4 | Exportin-5 XPO5 KIAA             | -0.71183 | -0.30324 | -0.61776 | -0.93261 | -0.83058 | -0.68953 | -0.70823 | -0.6547  | -0.93588 | -0.62509 |
| Q9HAV7 | GrpE protease GRPEL1 GR          | 0.684373 | 0.595346 | 0.692934 | 0.477679 | 0.522308 | 0.594082 | 0.673147 | 0.821993 | 0.968374 | 0.895469 |
| Q9HB07 | MYG1 exon MYG1 C12c              | 0.62629  | 0.776363 | 0.544444 | 0.641017 | 0.508952 | 0.791642 | 0.754174 | 0.597197 | 0.833974 | 0.97664  |
| Q9HB19 | Pleckstrin phosphatase PLEKHA2 T | -0.3646  | -0.57069 | -0.47925 | -0.71261 | -0.46051 | -0.7847  | -0.5251  | -0.6219  | -0.78641 | -0.82126 |
| Q9HB21 | Pleckstrin phosphatase PLEKHA1 T | -3.25096 | -2.34156 | -2.50901 | -1.9386  | -3.14048 | -1.68684 | -3.38466 | -3.65535 | -3.3505  | -2.28264 |
| Q9HB58 | Sp110 nucleol SP110              | -1.28011 | -1.2185  | -0.09259 | -0.79021 | -1.04532 | -1.04439 | -1.28157 | -1.05395 | -0.5025  | -0.42986 |
| Q9HB71 | Calcyclin-binding CACYBP S10     | 0.730891 | 0.751707 | 0.909488 | 0.826935 | 0.460783 | 0.938599 | 0.550447 | 0.790904 | 0.480704 | 0.833666 |
| Q9HB90 | Ras-related RRAGC                | -0.85042 | -0.64264 | -0.93147 | -1.18728 | -1.14048 | -0.80599 | -0.71329 | -0.64636 | -1.00946 | -0.65524 |
| Q9HBG7 | T-lymphocyte LY9 CDABP           | -1.04933 | -0.93892 | -0.94642 | -0.69574 | -0.87199 | -0.58496 | -1.18536 | -1.09464 | -0.90866 | -1.03585 |
| Q9HBH0 | Rho-related RHOV ARHF            | -0.86139 | -0.68589 | -1.80346 | -1.96285 | -2.79256 | -1.5366  | -1.9301  | -2.80735 | -1.95361 | -2.1788  |
| Q9HBH5 | Retinol dehydrogenase RDH14 PAN  | -1.13832 | -1.03704 | -1.32536 | -1.38606 | -1.82695 | -1.48948 | -1.78619 | -1.78558 | -1.33852 | -1.27191 |
| Q9HBL7 | Plasminogen PLGRKT C9            | 1.254822 | 1.132138 | 0.681821 | 0.595951 | 0.545556 | 0.711446 | 0.785891 | 0.656812 | 0.718484 | 0.283893 |

|        |                              |          |          |          |          |          |          |          |          |          |          |
|--------|------------------------------|----------|----------|----------|----------|----------|----------|----------|----------|----------|----------|
| Q9HC16 | DNA dC->d APOBEC3G           | 0.382334 | 1.053071 | -0.26111 | 0.452801 | -0.60229 | -0.38146 | 0.090869 | -0.62847 | -0.83039 | -0.99096 |
| Q9HC35 | Echinoderm EML4 C2orf        | 0.379743 | 0.451148 | 0.152706 | 0.066332 | -0.28876 | -0.0809  | 0.307813 | 0.160415 | -0.15295 | 0.029814 |
| Q9HC36 | rRNA meth MRM3 RNP           | -2.64689 | -2.36146 | -1.15634 | -1.45317 | -1.76702 | -1.11366 | -1.9301  | -1.93289 | -1.2916  | -1.04495 |
| Q9HC38 | Glyoxalase GLOD4 C17         | 0.314636 | 0.256521 | 0.357362 | 0.006259 | 0.517851 | 0.347923 | 0.470165 | 0.212688 | 0.727912 | 0.754321 |
| Q9HCC0 | Methylcrotonyl MCCC2 MC      | 0.784662 | 0.443033 | 0.360402 | 0.349267 | 0.065423 | 0.268489 | 0.460361 | 0.094182 | 0.273994 | 0.521637 |
| Q9HCD5 | Nuclear receptor NCOA5 KIA   | 0.085111 | 0.202512 | 0.338697 | 0.153276 | 0.001245 | 0.095339 | 0.409238 | 0.324156 | 0.220227 | 0.20657  |
| Q9HCE5 | N6-adenosine METTL14 K       | 0.285108 | 0.464136 | 0.121102 | 0.238435 | 0.071888 | 0.277534 | 0.001631 | 0.218409 | 0.139115 | 0.285885 |
| Q9HCG8 | Pre-mRNA CWC22 KIA           | -1.24093 | -0.32812 | -0.61657 | -0.71115 | -0.18334 | -0.62617 | -0.97624 | -0.77474 | -0.41902 | -0.50272 |
| Q9HCH5 | Synaptotagmin SYTL2 KIAA     | 0.902844 | 1.034673 | 1.277583 | 1.097024 | 1.068972 | 1.247928 | 1.195839 | 0.932613 | 0.285644 | 0.73608  |
| Q9HCI7 | E3 ubiquitin MSL2 KIAA       | 0.376645 | 0.369485 | 0.288798 | 0.359081 | 0.460783 | 0.254814 | 0.426503 | 0.217477 | -0.08746 | -0.20918 |
| Q9HCK8 | Chromodomain CHD8 HELS       | -1.09463 | -1.06398 | -0.9372  | -0.92737 | -0.81534 | -0.78969 | -0.84804 | -1.1626  | -0.73378 | -1.08664 |
| Q9HCN4 | GPN-loop GPN1 MBD            | -1.05618 | -0.57829 | -0.0872  | -0.12831 | -0.0333  | -0.21923 | -0.34838 | -0.374   | -0.22233 | -0.20605 |
| Q9HCN8 | Stromal cell SDF2L1 UN       | -0.12003 | 0.049819 | -0.11775 | -0.26806 | 0.043943 | -0.39334 | 0.209177 | -0.27684 | -0.67996 | -0.60054 |
| Q9HCS7 | Pre-mRNA XAB2 HCNF           | 0.501787 | 0.416921 | 0.019365 | 0.061401 | -0.07635 | 0.095157 | 0.173332 | 0.067114 | 0.108934 | 0.209693 |
| Q9HCU5 | Prolactin receptor PREB SEC1 | -0.53727 | -0.60657 | -0.94642 | -0.63604 | -0.95606 | -1.14958 | -0.63971 | -0.922   | -1.11784 | -0.7713  |
| Q9HCU9 | Breast cancer BRMS1          | 0.147244 | 0.3118   | -0.41129 | -0.61194 | -0.37431 | -0.44602 | -0.36043 | -0.01841 | -0.25849 | -0.06246 |
| Q9HD15 | Steroid receptor SRA1 PP76   | 0.212342 | 0.301824 | 0.50593  | 0.536103 | 0.549825 | 0.452965 | 0.422676 | 0.745599 | 0.826978 | 0.732231 |
| Q9HD20 | Manganese ATP13A1 A          | 1.159965 | 0.910808 | 0.348319 | 0.317672 | -0.10815 | -0.29351 | 0.649451 | 0.057424 | -0.6094  | 0.042797 |
| Q9HD33 | 39S ribosome MRPL47 NC       | -1.34023 | -1.46529 | -1.6734  | -1.23078 | -4.01495 | -1.75899 | -1.9301  | -1.30485 | -1.38702 | -2.1788  |
| Q9HD34 | LYR motif LYRM4 C6c          | 0.564614 | 0.521187 | 0.826171 | 0.507657 | 0.81794  | 0.822885 | 0.910297 | 0.877588 | 1.106747 | 1.325464 |
| Q9HD42 | Charged motif CHMP1A C1      | -0.62125 | -0.66731 | -0.24349 | -0.09834 | -0.06733 | -0.13224 | -0.16151 | -0.10266 | -0.13865 | -0.17006 |
| Q9HD45 | Transmembrane TM9SF3 SM      | 0.609008 | 0.665835 | -0.4021  | -0.11078 | -1.19052 | 0.005454 | 0.191366 | -0.13808 | -0.75754 | -1.12956 |
| Q9HDC9 | Adipocyte protein APMAP C20  | 1.042709 | 1.164748 | 0.174184 | 0.281711 | -0.57329 | 0.064642 | 0.463212 | 0.031189 | -1.38634 | -1.23612 |
| Q9NNW7 | Thioredoxin TXNRD2 KIA       | 0.969368 | 0.797293 | -1.52848 | -1.59582 | 0.739937 | 0.791656 | 0.696499 | 0.498454 | 1.556393 | 1.439174 |
| Q9NP31 | SH2 domain SH2D2A SC         | -0.77588 | -0.05971 | -0.15634 | 0.334419 | -0.19052 | -0.31647 | -0.13955 | -0.2978  | -0.20754 | 0.021959 |
| Q9NP61 | ADP-ribosylation ARFGAP3 A   | -1.54623 | -1.63043 | -0.80745 | -0.25994 | -2.26721 | -1.71009 | -1.54929 | -1.40035 | -1.80394 | -1.64822 |
| Q9NP64 | Nucleolar protein ZCCHC17 P  | -1.46855 | -1.42286 | -1.23676 | -1.32193 | -1.49139 | -1.17403 | -1.34514 | -0.85834 | -0.66493 | -1.37145 |
| Q9NP72 | Ras-related RAB18            | -2.16921 | -1.99901 | -1.9954  | -2.80176 | -2.00284 | -2.15085 | -2.42198 | -1.70155 | -2.33269 | -2.6398  |
| Q9NP77 | RNA polymerase SSU72 HSP     | 0.825369 | 1.00967  | 0.458666 | 0.747354 | 0.501847 | 0.362597 | 0.638702 | 0.351728 | 0.745189 | 0.832304 |
| Q9NP79 | Vacuolar protein VTA1 C6orf  | 0.484561 | 0.27919  | 0.723647 | 0.498806 | 0.7175   | 0.895185 | 0.348289 | 0.353637 | 0.889817 | 0.855843 |
| Q9NP80 | Calcium-invariant PNPLA8 IPL | -1.72489 | -1.09675 | -0.39696 | -0.06413 | -0.91341 | -0.20519 | -0.59266 | -0.59358 | -0.62803 | -1.1589  |
| Q9NP81 | Serine--tRNA SARS2 SARS      | 0.068353 | 0.263034 | 0.320368 | 0.163219 | -0.25118 | -0.20889 | 0.333502 | 0.317546 | -0.03422 | -0.16932 |
| Q9NP97 | Dynein light DYNLRB1 B       | 0.965785 | 0.906613 | 0.736818 | 0.432493 | 0.669448 | 0.845237 | 0.745635 | 0.937495 | 1.106679 | 0.867425 |



|        |                      |            |          |          |          |          |          |          |          |          |          |          |
|--------|----------------------|------------|----------|----------|----------|----------|----------|----------|----------|----------|----------|----------|
| Q9NPA8 | Transcripti          | ENY2 DC6   | 0.741807 | 0.540081 | 1.280796 | 0.948926 | 1.330824 | 1.08231  | 1.012733 | 0.726624 | 1.463711 | 1.424411 |
| Q9NPD3 | Exosome c            | EXOSC4 RR  | 0.837961 | 0.894258 | 0.14012  | 0.440194 | 0.58865  | 0.431043 | 0.42261  | 0.264006 | 0.833717 | 0.858249 |
| Q9NPE3 | H/ACA ribo           | NOP10 NOI  | 0.081098 | 0.369387 | 0.488903 | 0.144133 | 0.606901 | 0.704505 | 0.683025 | 0.714657 | 0.911569 | 1.228044 |
| Q9NPF4 | Probable tf          | OSGEP GCF  | -0.44973 | -0.39249 | -0.36365 | -0.35759 | -0.20375 | -0.47308 | -0.38956 | -0.31838 | -0.28964 | -0.06296 |
| Q9NPF5 | DNA methy            | DMAP1 KIA  | -0.1809  | -0.06209 | -0.74828 | -0.61956 | -0.27377 | -0.67903 | -0.50338 | -0.83755 | -0.92834 | -0.51305 |
| Q9NPG3 | Ub nucleo            | UBN1       | 0.187331 | 0.357362 | 0.67319  | 0.273451 | 0.7175   | -0.00548 | 0.802963 | 0.498454 | 0.562791 | 0.622815 |
| Q9NPH0 | Lysophospl           | ACP6 ACPL  | -1.26546 | -0.49246 | -0.31221 | -0.56937 | -0.59991 | -0.60145 | -0.33865 | -0.30485 | -0.43084 | -0.09134 |
| Q9NPH2 | Inositol-3- $\gamma$ | ISYNA1 INC | 0.133088 | 0.27919  | -0.0516  | 0.012491 | -0.03767 | 0.356485 | 0.449163 | 0.494395 | 0.206137 | 0.738735 |
| Q9NPI1 | Bromodom             | BRD7 BP75  | -0.69515 | -0.74348 | 0.310969 | 0.38813  | 0.174874 | 0.140481 | -0.15656 | 0.212545 | 0.415037 | 0        |
| Q9NPI6 | mRNA-dec             | DCP1A SMI  | -0.46855 | -0.10124 | -0.64874 | -0.9682  | -0.61123 | -0.33015 | -0.86343 | -0.63743 | -0.43721 | -0.38294 |
| Q9NPQ8 | Synembryn            | RIC8A      | -0.32684 | -0.62314 | -0.06439 | -0.66438 | -0.60115 | -0.38466 | -0.02191 | -0.03091 | -0.11036 | -0.25387 |
| Q9NQ29 | Putative R           | LUC7L LUC  | -0.5606  | -0.35543 | -1.88753 | -1.4361  | -0.86649 | -0.81905 | -0.63604 | -0.49667 | -0.58839 | -0.71871 |
| Q9NQ48 | Leucine zip          | LZTFL1     | -3.25096 | -1.91667 | -1.72403 | -1.7794  | -2.47063 | -1.58496 | -1.41163 | -1.76783 | -1.61353 | -1.3375  |
| Q9NQ55 | Suppressor           | PPAN BXDC  | -2.39411 | -2.30039 | -2.05822 | -2.01732 | -2.16687 | -2.79891 | -2.47859 | -1.99567 | -2.10756 | -1.73726 |
| Q9NQ89 | Protein C1           | C12orf4    | -2.68536 | -1.63656 | -1.11353 | -1.07731 | -1.22487 | -1.22422 | -1.06274 | -1.19592 | -1.37474 | -1.46609 |
| Q9NQC1 | E3 ubiquiti          | JADE2 KIAA | -1.2309  | -1.16976 | -0.62419 | -0.6946  | -0.55876 | -0.42706 | -0.73266 | -0.62988 | -0.61874 | -0.69671 |
| Q9NQC3 | Reticulon-4          | RTN4 KIAA  | -0.51205 | -0.35755 | -0.42354 | -0.53093 | -0.84899 | -0.77627 | -0.69513 | -1.03749 | -1.1597  | -0.87802 |
| Q9NQC7 | Ubiquitin c          | CYLD CYLD  | -1.21193 | -1.05576 | 0.956459 | 1.040206 | -1.16473 | -0.16653 | -0.57572 | -0.64556 | -0.47279 | -0.33388 |
| Q9NQG5 | Regulation           | RPRD1B C2  | -1.16369 | -0.7042  | -0.32371 | -0.74084 | -0.29193 | -0.29847 | -0.74211 | -0.35735 | -0.1035  | 0.135043 |
| Q9NQG6 | Mitochond            | MIEF1 MID  | -3.08746 | -2.24598 | -3.57719 | -3.9386  | -3.27798 | -3.34395 | -3.81762 | -4.07039 | -3.86507 | -3.21945 |
| Q9NQH7 | Xaa-Pro arr          | XPNPEP3    | -3.5025  | -2.32193 | -3.6734  | -3.26053 | -4.01495 | -3.18641 | -4.05209 | -3.65535 | -2.52947 | -2.28264 |
| Q9NQP4 | Prefoldin s          | PFDN4 PFD  | 0.059887 | 0.18763  | 0.164944 | -0.28155 | -0.14917 | -0.1512  | -0.03187 | -0.04776 | 0.303315 | 0.040366 |
| Q9NQR4 | Omega-am             | NIT2 CUA0  | -0.1016  | -0.11334 | -0.50349 | -0.06997 | -0.77833 | -0.92546 | -0.20221 | -0.29586 | -0.19563 | 0.034852 |
| Q9NQS1 | Cell death           | AVEN       | -1.33066 | -1.28402 | -1.23539 | -1.1186  | -0.92811 | -1.37908 | -1.23507 | -1.26303 | -0.82961 | -1.07969 |
| Q9NQT4 | Exosome c            | EXOSC5 CN  | 0.812541 | 0.996096 | 0.915702 | 0.666263 | 0.800967 | 0.895185 | 0.486157 | 0.684498 | 1.344383 | 1.251185 |
| Q9NQT5 | Exosome c            | EXOSC3 RR  | 0.214644 | 0.158325 | 0.28987  | -0.45412 | -0.04492 | 0.056419 | 0.316893 | 0.233991 | 0.552278 | 0.638678 |
| Q9NQT8 | Kinesin-like         | KIF13B GA  | -0.48274 | -0.40857 | -0.33281 | -0.5252  | -0.65269 | -0.46501 | -0.49815 | -0.43289 | -0.71619 | -0.63425 |
| Q9NQW6 | Anillin              | ANLN       | -1.60942 | -1.50901 | -1.4021  | -1.40255 | -1.45017 | -1.1989  | -3.05209 | -1.65535 | -1.38702 | -1.71937 |
| Q9NQW7 | Xaa-Pro arr          | XPNPEP1 X  | -0.51111 | -0.50348 | -1.17566 | -0.8353  | -1.26569 | -1.16909 | -1.22494 | -1.15265 | -0.92383 | -1.13481 |
| Q9NQX3 | Gephyrin [I          | GPHN GPH   | -1.34023 | -1.11353 | -0.94642 | -0.56937 | -2.23565 | -2.45487 | -1.53964 | -0.62855 | -0.18057 | -0.45391 |
| Q9NQZ2 | Something            | UTP3 CRLZ  | -3.11703 | -2.30719 | -1.8007  | -1.45124 | -2.07074 | -2.34735 | -1.19899 | -1.77684 | -1.47252 | -1.55757 |
| Q9NQZ5 | StAR-relate          | STARD7 GT  | -0.68536 | -0.42809 | 0.314109 | 0.247267 | 0.703868 | 0.871485 | 0.315776 | 0.207595 | 0.504163 | 1.015407 |
| Q9NR09 | Baculoviral          | BIRC6 KIAA | -1.46855 | -0.88033 | -1.82239 | -2.42905 | -1.9855  | -2.26042 | -2.76545 | -2.49837 | -2.63938 | -1.92696 |

|        |                        |          |          |          |          |          |          |          |          |          |          |
|--------|------------------------|----------|----------|----------|----------|----------|----------|----------|----------|----------|----------|
| Q9NR12 | PDZ and LII PDLIM7 EN  | -0.35549 | -0.23145 | -0.32662 | -0.49728 | 0.003613 | 0.258924 | -1.3322  | -1.08246 | -1.22396 | -1.00888 |
| Q9NR28 | Diablo horr DIABLO SM  | -0.17646 | -0.01455 | -0.2898  | -0.25114 | -0.23798 | 0.029208 | -0.47259 | -0.32932 | -0.56417 | -0.47631 |
| Q9NR30 | Nucleolar F DDX21      | 0.553272 | 0.55143  | -0.14454 | -0.38434 | 0.133317 | 0.058884 | 0.162494 | -0.1357  | -0.10314 | -0.03656 |
| Q9NR31 | GTP-bindin SAR1A SAR   | 0.089482 | 0.519558 | -0.97057 | -0.64819 | -0.52013 | -0.49214 | -0.82266 | -0.51738 | -0.90263 | -0.6314  |
| Q9NR45 | Sialic acid s NANS SAS | -0.30986 | 0.236803 | -0.48515 | -0.90559 | 0.213868 | 0.090032 | -0.8493  | -0.49079 | -0.08579 | -0.06428 |
| Q9NR46 | Endophilin- SH3GLB2 K  | -0.10692 | 0.320368 | 0.482639 | 0.397684 | 0.400087 | 0        | 0.186878 | 0.375867 | 0.606798 | 0.518551 |
| Q9NR50 | Translation EIF2B3     | -0.13971 | -0.14931 | -0.07165 | -0.07615 | -0.34373 | -0.02137 | -0.30683 | -0.2545  | 0.092127 | -0.02198 |
| Q9NR56 | Muscleblin MBNL1 EXF   | -0.0927  | 0.098224 | 0.469515 | 0.267697 | 0.270241 | 0.228156 | 0.330514 | 0.164517 | 0.658492 | 0.455403 |
| Q9NRF9 | DNA polym POLE3 CHR    | -1.87245 | -1.75002 | -1.88393 | -2.23863 | -2.13086 | -2.15741 | -2.63604 | -2.451   | -2.17525 | -2.53405 |
| Q9NRG0 | Chromatin CHRAC1 CF    | -3.37126 | -2.50901 | -3.20945 | -4.03814 | NA       | NA       | -3.68012 | -3.39232 | -2.93546 | -3.70487 |
| Q9NRG9 | Aladin (Adr AAAS ADR/  | -0.31739 | 0.038474 | 0.256521 | 0.319417 | -0.269   | 0.268489 | 0.177861 | -0.31907 | -0.10764 | 0.008824 |
| Q9NRL3 | Striatin-4 (STRN4 ZIN  | -0.53705 | -0.7408  | -0.5276  | -0.64378 | -0.56742 | -0.79528 | -0.59758 | -0.83105 | -0.72143 | -0.38567 |
| Q9NRN7 | L-aminoadi AASDHPPT    | 0.972461 | 1.301509 | 1.23349  | 1.190684 | 1.194503 | 0.932886 | 1.094068 | 1.053387 | 1.016408 | 1.041441 |
| Q9NRR5 | Ubiquilin-4 UBQLN4 C1  | 1.96782  | 1.856636 | -1.47687 | -1.08469 | 0.770775 | 1.222392 | -1.24672 | -1.51803 | -1.34253 | -1.62803 |
| Q9NRR8 | CDC42 sma CDC42SE1 :   | 0.029995 | 0.226842 | 0.744743 | 0.516454 | 0.534513 | 0.540568 | 0.67423  | 0.709221 | 0.281771 | -0.08663 |
| Q9NRS6 | Sorting nex SNX15      | -1.06193 | -1.57719 | -1.96153 | -1.0126  | -1.03006 | -0.93587 | -1.30666 | -0.95491 | -0.89107 | -2.00888 |
| Q9NRV9 | Heme-bind HEBP1 HBP    | 0.076726 | 0.27919  | 0.440162 | 0.299168 | 0.519028 | 0.343623 | 0.045324 | -0.25676 | -0.52947 | -0.2143  |
| Q9NRW3 | DNA dC->d APOBEC3C     | 0.107973 | 0.005773 | -1.42818 | -0.55436 | 0.348454 | 0.431339 | -0.93376 | -0.5854  | -1.56621 | -1.71945 |
| Q9NRX1 | RNA-bindir PNO1        | -0.89482 | -0.73697 | -1.18265 | -1.52356 | -1.07635 | -1.03317 | -0.782   | -0.71989 | -0.5025  | -0.29888 |
| Q9NRX4 | 14 kDa phc PHPT1 PHP   | -1.07727 | -1.16459 | -1.12164 | -0.62632 | -1.41703 | -0.8037  | -1.41977 | -1.26205 | -0.82251 | -0.54028 |
| Q9NRY5 | Protein FAI FAM114A2   | -0.47354 | -0.30179 | -0.49246 | -0.68326 | -0.55552 | -0.30968 | -0.17955 | -0.71989 | -0.21847 | -0.1738  |
| Q9NRY6 | Phospholip PLSCR3      | 0.133088 | 0.09067  | 0.23349  | 0.344335 | -0.16528 | 0.570316 | 0.06502  | 0.648429 | -0.01898 | -0.58054 |
| Q9NS23 | Ras associa RASSF1 RD  | 0.887099 | 0.874044 | 0.69149  | 0.439904 | 0.477372 | 0.58428  | 0.639812 | 0.541275 | -0.10861 | -0.05705 |
| Q9NS69 | Mitochond TOMM22 T     | -0.48543 | -0.23217 | -3.57719 | -1.91475 | -2.31025 | -2.34129 | -1.63176 | -2.69188 | -1.86303 | -2.62803 |
| Q9NS86 | LanC-like p LANCL2 GP  | -2.16613 | -1.55138 | -1.50421 | -1.24642 | -2.07977 | -3.14475 | -2.60181 | -2.78867 | -1.55124 | -1.45518 |
| Q9NSD9 | Phenylalan FARSB FAR   | -0.70499 | -0.35974 | -0.6159  | -0.82116 | -0.63413 | -0.83494 | -0.69876 | -0.80997 | -0.82298 | -0.42812 |
| Q9NSE4 | Isoleucine- IARS2      | 0.436099 | 0.67319  | 0.742414 | 0.685891 | 0.405712 | 0.850424 | 0.667804 | 0.774264 | 0.734134 | 0.549117 |
| Q9NSI8 | SAM doma SAMSN1 H      | 0.693673 | 0.699181 | 0.719773 | 0.696649 | 0.428935 | 0.197563 | 0.479589 | 0.423113 | 0.073566 | 0.351192 |
| Q9NSU2 | Three-prim TREX1       | -1.05354 | -1.17418 | -1.19384 | -0.96254 | -2.01998 | -2.1375  | -1.1938  | -1.99619 | -1.52441 | -0.8045  |
| Q9NT62 | Ubiquitin-li ATG3 APG3 | -0.03086 | -0.22832 | 1.257792 | 1.017911 | 1.066228 | 1.058079 | -0.03126 | 0.094093 | -0.21586 | -0.47901 |
| Q9NTI5 | Sister chroi PDS5B APR | -0.18746 | -0.24136 | -0.03939 | -0.35444 | -0.01    | -0.34975 | -0.38482 | -0.04834 | -0.30887 | -0.12152 |
| Q9NTJ5 | Phosphatid SACM1L KI   | -0.00607 | -0.07605 | -0.13914 | -0.35846 | -0.88567 | -0.635   | -0.5934  | -0.57214 | -1.18014 | -0.48217 |
| Q9NTK5 | Obg-like A1OLA1 GTPB   | 1.200784 | 1.205271 | 1.297546 | 1.226702 | 1.114267 | 1.090448 | 1.193604 | 1.218979 | 1.461913 | 1.207563 |

|        |                            |          |          |          |          |          |          |          |          |          |          |
|--------|----------------------------|----------|----------|----------|----------|----------|----------|----------|----------|----------|----------|
| Q9NTM9 | Copper hor CUTC CGI-3      | -0.60853 | -0.18333 | -0.01573 | -0.08963 | -0.36205 | -0.43068 | -0.38801 | -0.64817 | -0.11483 | -0.10555 |
| Q9NTW7 | Zinc finger ZFP64 ZNF      | -0.03063 | 0.199938 | 0.540081 | 0.533888 | 0.460783 | 0.736966 | 0.426503 | 0.131245 | 0.540274 | 0.499895 |
| Q9NTX5 | Ethylmalon ECHDC1          | -0.18258 | -0.01421 | -0.13918 | -0.06994 | -0.25538 | 0.019105 | -0.22681 | -0.09567 | 0.114583 | 0.099016 |
| Q9NTZ6 | RNA-bindin RBM12 KIA       | 0.805021 | 0.821138 | 0.62221  | 0.293862 | 0.416368 | 0.365683 | 0.973342 | 0.668287 | 0.903647 | 0.918028 |
| Q9NU22 | Midasin (D) MDN1 KIA/      | -0.43241 | -0.44792 | -0.42464 | -0.47811 | -0.23958 | -0.36534 | -0.35947 | -0.66763 | -0.27761 | -0.59579 |
| Q9NUB1 | Acetyl-coer ACSS1 ACA      | 0.644721 | 0.769357 | -0.21624 | -0.01638 | -0.56393 | 0.064358 | 0.214128 | -0.04123 | -0.20044 | -0.36118 |
| Q9NUG6 | p53 and DN PDRG1 C2C       | 1.334001 | 1.066671 | 1.206711 | 1.392915 | 1.572515 | 1.431339 | 1.323973 | 1.342392 | 1.804658 | 1.598178 |
| Q9NUJ1 | Palmitoyl- $\gamma$ ABHD10 | 0.842312 | 0.73925  | 0.407659 | 0.770725 | 0.79969  | 0.856564 | 0.670788 | 0.522164 | 0.746301 | 0.663928 |
| Q9NUL3 | Double-str; STAU2          | 0.40439  | 0.196539 | 0.445898 | 0.568138 | 0.498119 | 0.720477 | 0.500694 | 0.5025   | 0.473931 | 0.442435 |
| Q9NUL5 | Shiftless an SHFL C19or    | 0.774067 | 0.87376  | 0.702238 | 0.88922  | 1.128008 | 1.013598 | 1.052741 | -0.2978  | 1.310568 | 1.253043 |
| Q9NUP1 | Biogenesis BLOC1S4 C       | -0.41908 | -0.48153 | -0.68589 | -0.39428 | -0.47063 | -0.42968 | -0.53222 | -0.36995 | -0.05282 | 0.186547 |
| Q9NUP9 | Protein lin- LIN7C MAL     | 0.788177 | 0.875886 | 0.850161 | 0.916061 | 1.213868 | 0.769387 | 0.831992 | 0.880701 | 1.030325 | 0.984427 |
| Q9NUQ2 | 1-acyl-sn-g; AGPAT5        | 0.138605 | 0.275973 | 0.003894 | -0.4361  | 0.007417 | 0.160177 | 0.239827 | 0.289507 | -0.25739 | -0.18382 |
| Q9NUQ3 | Gamma-ta; TXLNG CXo        | -2.16587 | -1.73334 | -1.3082  | -1.94889 | -1.29659 | -0.85173 | -1.1563  | -1.84067 | -1.51693 | -1.01918 |
| Q9NUQ8 | ATP-bindin ABCF3           | -1.59533 | -1.20367 | -0.43335 | -0.24558 | -0.33313 | -0.69567 | 0.079617 | -0.36257 | -1.08746 | -0.40621 |
| Q9NUQ9 | CYFIP-relat CYRIB CYRI     | 0.410263 | 0.638291 | 0.562005 | 0.358409 | 0.514459 | 0.466725 | 0.495003 | 0.40929  | 0.518849 | 0.554364 |
| Q9NUU7 | ATP-depen DDX19A DI        | -0.90136 | -1.02936 | -0.9707  | -0.75662 | -1.13427 | -0.69293 | -0.92789 | -0.92925 | -0.31721 | -0.04541 |
| Q9NUV9 | GTPase IM; GIMAP4 IA       | -0.44476 | -0.05335 | 0.697234 | 0.683672 | 0.662466 | 0.196638 | 0.600269 | 0.474687 | 0.646051 | 0.690739 |
| Q9NUW8 | Tyrosyl-DN TDP1            | -2.68536 | -1.42286 | -0.26929 | -0.69574 | -0.8055  | -0.45194 | -0.75585 | -0.59358 | -0.33852 | -0.27727 |
| Q9NV06 | DDB1- and DCAF13 WI        | -0.9523  | -1.7112  | -1.6734  | -0.83426 | -1.89947 | -1.16175 | -1.4957  | -0.43812 | -0.89984 | -1.03585 |
| Q9NV70 | Exocyst cor EXOC1 SEC      | 0.316743 | 0.326352 | 0.61329  | 0.434947 | 0.192479 | 0.456813 | 0.263438 | 0.13422  | 0.366467 | 0.246179 |
| Q9NVA2 | Septin-11 SEPTIN11 S       | -0.92521 | -0.55578 | -0.30348 | -0.28489 | -0.53126 | -0.51675 | -0.52321 | -0.38339 | -0.871   | -0.97228 |
| Q9NVC6 | Mediator o MED17 AR        | -1.62803 | -1.5541  | -0.78991 | -0.73697 | -0.33313 | -0.26303 | -0.85415 | -0.13808 | -0.07251 | 0.0859   |
| Q9NVE7 | 4'-phospho PANK4           | -0.50899 | -0.21248 | -0.47889 | -0.56783 | -0.59482 | -0.80244 | -0.3405  | -0.71564 | -0.63934 | -0.5997  |
| Q9NVF7 | F-box only FBXO28 CE       | -1.64689 | -1.62449 | -1.5427  | -2.71621 | -3.42999 | -2.02203 | -1.6477  | -1.71049 | -2.06756 | -1.51584 |
| Q9NVH1 | DnaJ homo DNAJC11          | -3.03684 | -3.53138 | NA       | NA       | -3.69302 | -3.1375  | -3.81762 | -3.97728 | -4.00946 | -2.08194 |
| Q9NVH2 | Integrator (INTS7 C1or     | -2.72489 | -2.02359 | -1.68589 | -1.96285 | -1.22487 | -1.52083 | -1.53964 | -1.93289 | -1.91754 | -1.64829 |
| Q9NVI7 | ATPase fan ATAD3A          | -0.93772 | -0.77284 | -1.14265 | -1.38559 | -1.51307 | -1.09869 | -1.30866 | -1.22338 | -1.46174 | -1.60393 |
| Q9NVK5 | FGFR1 onc; FGFR1OP2        | -0.08104 | -0.16506 | 0.566287 | 0.536136 | 0.423333 | 0.383118 | 0.399926 | 0.244281 | 0.57411  | 0.548482 |
| Q9NVM6 | DnaJ homo DNAJC17          | -0.33915 | 0.040166 | 1.148893 | 0.734756 | 0.778339 | 0.982744 | 1.133999 | 1.047607 | 0.916401 | 1.160057 |
| Q9NVM9 | Integrator (INTS13 ASL     | 0.275107 | 0.375509 | 0.437285 | 0.407175 | 0.48755  | 0.533035 | 0.471473 | 0.680932 | 0.40439  | 0.375786 |
| Q9NVP1 | ATP-depen DDX18 cPE        | 0.794071 | 0.762104 | 0.578401 | 0.267857 | 1.136441 | 1.194011 | 0.936732 | 0.747705 | 0.726827 | 0.70384  |
| Q9NVR2 | Integrator (INTS10 C8c     | -0.04307 | 0.199938 | -0.02756 | 0.15451  | 0.207442 | -0.07861 | -0.13393 | -0.07039 | -0.18593 | 0.228701 |

|        |                        |          |          |          |          |          |          |          |          |          |          |
|--------|------------------------|----------|----------|----------|----------|----------|----------|----------|----------|----------|----------|
| Q9NVS2 | 39S ribosom MRPS18A    | -0.19438 | 0.007777 | -0.13906 | -0.0973  | -0.51245 | -0.38618 | 0.155069 | -0.16993 | -0.09248 | -0.01781 |
| Q9NVU0 | DNA-direct POLR3E KIA  | -0.67565 | -0.50901 | -0.53703 | -0.89129 | -0.57755 | -0.33015 | -0.41845 | -0.4459  | -0.45003 | -0.9141  |
| Q9NVU7 | Protein SD/SDAD1 NU    | -0.65946 | 0.063029 | -0.18411 | -0.27006 | -0.5518  | -0.48312 | -0.37021 | -1.17884 | -1.03333 | -0.88855 |
| Q9NVV4 | Poly(A) RN, MTPAP PAI  | 0.012073 | 0.445898 | 0.288798 | 0.879024 | -0.24236 | 0.360747 | -0.3322  | 0.241889 | -0.50919 | 0.213514 |
| Q9NVW2 | E3 ubiquitin RLIM RNF1 | -1.37126 | -1.23676 | -1.03154 | -0.82312 | -1.31451 | -0.85457 | -0.74723 | -0.9886  | -1.31487 | -0.50324 |
| Q9NVX2 | Notchless ꞑ NLE1 HUSS  | -0.59104 | -0.32193 | -1.10512 | -1.10402 | -0.5231  | -0.90484 | -0.9301  | -0.922   | 0.13493  | 0.348239 |
| Q9NVZ3 | Adaptin ea NECAP2      | -0.411   | 0.155119 | 0.108863 | -0.13813 | -0.34955 | -0.10776 | -0.38466 | -0.1571  | 0.338802 | 0.269657 |
| Q9NW13 | RNA-bindin RBM28       | -0.54609 | -0.14768 | -0.66944 | -0.78992 | -0.03767 | -0.20519 | -0.40484 | -0.36257 | -0.37642 | -0.78328 |
| Q9NW64 | Pre-mRNA- RBM22 ZC3    | -2.28766 | -0.45508 | -1.59361 | -0.85128 | -2.01495 | -1.76542 | -1.26481 | -1.1981  | -1.6237  | -1.34185 |
| Q9NW82 | WD repeat WDR70        | -0.88359 | -0.80346 | -0.00782 | -0.05759 | -0.09212 | 0.105353 | -0.46007 | -0.14439 | 0.082462 | 0.309483 |
| Q9NWB6 | Arginine ar ARGLU1     | -0.05561 | 0.137504 | 0.008902 | 0.126054 | -0.07575 | -0.35318 | -0.30666 | -0.04654 | -0.16116 | 0.429349 |
| Q9NWH9 | SAFB-like tr SLTM MET  | 0.326751 | 0.226842 | 0.272944 | 0.088198 | 0.128008 | 0.386058 | 0.18294  | 0.465273 | 0.578663 | 0.485998 |
| Q9NWQ8 | Phosphopr PAG1 CBP I   | -0.92494 | -1.37324 | -0.96153 | -1.29562 | -1.49207 | -1.084   | -1.33392 | -1.8051  | -1.86507 | -1.47836 |
| Q9NWT8 | Aurora kinꞑ AURKAIP1   | -0.88359 | -0.98449 | -0.47069 | -1.02531 | -1.03006 | -0.92545 | -0.73016 | -1.19592 | 0.540274 | 0.190431 |
| Q9NWU1 | 3-oxoacyl-[ OXSM       | 0.491797 | 0.631617 | 0.085185 | 0.139528 | 0.355683 | 0.445416 | 0.400912 | 0.287484 | 0.520377 | 0.46668  |
| Q9NWU2 | Glucose-incr GID8 C20o | -2.68536 | -1.90202 | -1.94642 | -1.8011  | -1.55552 | -1.87447 | -1.782   | -1.93289 | -2.30319 | -2.1589  |
| Q9NWU5 | 39S ribosom MRPL22 M   | -0.88359 | -1.07195 | -0.53138 | -0.32979 | -1.45017 | -0.80599 | -0.83577 | -0.90046 | -0.92647 | -1.32636 |
| Q9NWV4 | CXXC motif CZIB C1orf  | 0.388915 | 0.345135 | 0.323487 | 0.209792 | 0.405712 | 0.364997 | 0.274077 | 0.39776  | 0.357322 | 0.665292 |
| Q9NWW8 | BRISC and IBABAM1 C    | -1.73724 | -1.77984 | 0.01165  | -0.25303 | -0.23505 | -0.12002 | -0.19704 | -0.07641 | 0.004707 | -0.27191 |
| Q9NWW6 | Nicotinami NMRK1 C9o   | -0.47697 | -0.43862 | -0.25061 | -0.49676 | -0.54463 | -0.1315  | -0.56212 | -0.56789 | -0.66493 | -0.54783 |
| Q9NWW4 | Histone PA HPF1 C4orf  | 0.319501 | 0.419903 | 0.637987 | 0.354933 | 0.293209 | 0.671273 | 0.178775 | 0.473507 | 0.680751 | 0.36306  |
| Q9NWZ3 | Interleukin IRAK4      | 0.568707 | 0.723647 | 0.90533  | 0.875609 | 0.943119 | 0.82905  | 0.727727 | 0.85561  | 0.553184 | 0.442435 |
| Q9NX14 | NADH dehyd NDUFB11 L   | 0.956931 | 0.744743 | 0.163619 | 0.383329 | -0.19052 | 0.832123 | 0.776328 | 0.251539 | -0.4635  | -0.59162 |
| Q9NX24 | H/ACA ribo NHP2 NOL    | -0.1706  | 0.077363 | -0.06141 | -0.1632  | -0.18063 | -0.04027 | 0.047942 | -0.0374  | 0.111212 | 0.021168 |
| Q9NX40 | OCIA doma OCIAD1 AS    | 0.356256 | 0.105544 | 0.054168 | -0.11539 | -0.15132 | 0.076988 | -0.08627 | -0.07624 | -0.24731 | -0.2466  |
| Q9NX46 | ADP-ribose ADPRS ADF   | -0.42043 | -0.48457 | -0.30421 | -0.81855 | -0.30875 | -0.07514 | -0.35018 | -0.09385 | 0.188612 | -0.11033 |
| Q9NX55 | Huntingtin- HYPK C15o  | -1.35566 | -0.88753 | -0.50164 | -0.58838 | -0.17864 | -0.48758 | -0.27323 | -0.34947 | -0.08559 | -0.00385 |
| Q9NX58 | Cell growth LYAR PNAS  | 0.529689 | 0.121019 | 0.282175 | 0.103019 | 0.453941 | 0.049958 | 0.230583 | 0.136678 | 0.036266 | -0.1277  |
| Q9NX63 | MICOS comr CHCHD3 M    | 0.431199 | 0.708609 | 0.645302 | 0.593302 | 0.638492 | 0.533311 | 0.213595 | 0.577289 | 0.706076 | 0.650052 |
| Q9NX70 | Mediator o MED29 IXL   | -1.57289 | -1.11353 | -1.24598 | -1.7794  | -1.66918 | -1.58496 | -1.12832 | -1.46949 | -1.81444 | -1.16882 |
| Q9NX74 | tRNA-dihyc DUS2 DUS2   | 1.079597 | 1.206711 | 1.536053 | 1.344335 | 1.779466 | 1.337149 | 1.65811  | 1.592576 | 1.411497 | 1.550629 |
| Q9NX76 | CKLF-like N CMTM6 CK   | 2.411589 | 2.307106 | 1.325365 | 0.807042 | 0.940111 | 1.022137 | 1.20707  | 0.683939 | 0.947374 | 0.696811 |
| Q9NXA8 | NAD-deper SIRT5 SIR2L  | -0.44361 | -0.42286 | -0.43335 | -0.26806 | -0.34252 | -0.54455 | -0.44606 | -0.34792 | -0.21299 | -0.83303 |

|        |                        |          |          |          |          |          |          |          |          |          |          |
|--------|------------------------|----------|----------|----------|----------|----------|----------|----------|----------|----------|----------|
| Q9NXC5 | GATOR con MIOS         | -0.75876 | -0.8329  | -0.82206 | -1.04784 | -0.69561 | -0.63227 | -0.98547 | -1.01994 | -0.71346 | -0.6623  |
| Q9NXE4 | Sphingomy SMPD4 KIA    | -0.28011 | 0.23349  | -1.92605 | -1.35792 | -0.39046 | -0.95693 | -1.6453  | -1.99223 | -1.58496 | -0.80957 |
| Q9NXF1 | Testis-expr TEX10 L18  | -1.37126 | -1.28345 | -0.79667 | -1.67557 | -0.79256 | -1.22422 | -0.95964 | -1.04654 | -1       | -1.21945 |
| Q9NXG2 | THUMP do THUMPDP1      | -0.64748 | -0.55483 | -0.65965 | -0.57956 | -0.33313 | -0.54455 | -0.31937 | -0.39232 | -0.51901 | -0.07674 |
| Q9NXH9 | tRNA (guar TRMT1       | -1.12663 | -1.53138 | -0.82402 | -0.98751 | -1.07635 | -1.5366  | -0.80863 | -0.79737 | -1.67243 | -1.11032 |
| Q9NXR1 | Nuclear dis NDE1 NUD   | 0.956931 | 0.259781 | 0.685364 | 0.816288 | 0.18799  | 0.686925 | 0.356304 | 0.51056  | 0.121991 | 1.681939 |
| Q9NXV6 | CDKN2A-in CDKN2AIP     | -0.45216 | -0.37559 | -0.13291 | -0.21805 | -0.06853 | -0.09603 | -0.34839 | -0.30221 | -0.27391 | -0.04975 |
| Q9NY12 | H/ACA ribo GAR1 NOL    | 1.508194 | 1.472839 | 0.58756  | 0.885829 | 0.935363 | 1.19162  | 1.079617 | 1.328782 | 1.039528 | 1.008824 |
| Q9NY27 | Serine/thre PPP4R2 SBI | -0.05258 | -0.09419 | 0.234502 | 0.321918 | 0.527307 | 0.427268 | 0.130952 | 0.223968 | 0.06108  | 0.062657 |
| Q9NY33 | Dipeptidyl DPP3        | 0.275307 | 0.33504  | -0.44392 | -0.46179 | -0.51245 | -0.60977 | -0.37137 | -0.31194 | -0.62076 | -0.52855 |
| Q9NY35 | Claudin do CLDND1 C3   | -0.12003 | -0.90202 | -1.4021  | -0.87971 | -1.10806 | -0.33703 | -1       | -1.10692 | -1.88235 | -1.69052 |
| Q9NY93 | Probable A DDX56 DD    | -1.89623 | -1.30758 | -1.54525 | -2.23833 | -2.05618 | -2.07903 | -1.46505 | -1.41886 | -1.57096 | -1.76416 |
| Q9NYB0 | Telomeric r TERF2IP DF | -0.22239 | -0.33171 | 0.133954 | 0.018696 | 0.029444 | 0.130532 | -0.16227 | 0.078003 | -0.1541  | 0.302324 |
| Q9NYF8 | Bcl-2-assoc BCLAF1 BTI | -0.47838 | -0.20619 | 0.240108 | 0.162141 | 0.255598 | 0.304334 | 0.093423 | 0.138649 | 0.467598 | 0.418891 |
| Q9NYH9 | U3 small nt UTP6 C17o  | 0.408652 | 0.366464 | -0.13906 | -0.41923 | -0.27798 | 0.448127 | 0.079617 | 0.126894 | 0.254365 | 0.056413 |
| Q9NYJ1 | Cytochrom COA4 CHCI    | -2.0025  | -1.96859 | -1.25151 | -2.03584 | -0.63413 | -0.35789 | -1.71134 | -1.65546 | -1.79805 | -1.39754 |
| Q9NYL9 | Tropomodt TMOD3        | 0.665652 | 0.656102 | 0.743567 | 0.783811 | 0.957863 | 0.647478 | 0.567766 | 0.742118 | 1.107953 | 0.887427 |
| Q9NYM9 | BET1-like p BET1L GS1f | 0.020044 | -0.12744 | -0.33692 | -0.27512 | -0.83033 | -0.3052  | -0.35385 | -0.42631 | -0.2378  | -0.16693 |
| Q9NYU2 | UDP-glucos UGGT1 GT    | 0.397341 | 0.556081 | 0.249978 | 0.38813  | 0.043943 | 0.110424 | 0.464075 | -0.04654 | -0.06263 | -0.28264 |
| Q9NYV4 | Cyclin-depe CDK12 CRK  | -1.43    | -1.1582  | -2.13906 | -1.30633 | -1.39947 | -0.65423 | -1.41163 | -1.34792 | -2.06756 | -1.22979 |
| Q9NYZ3 | G2 and S pl GTSE1      | -1.59104 | -3.24598 | -2.83094 | -1.86821 | NA       | NA       | -3.61599 | -3.51785 | -3.73383 | -0.72668 |
| Q9NZ01 | Very-long-c TECR GPSN  | 1.552936 | 1.495214 | 1.389662 | 1.454055 | 1.415368 | 1.44368  | 1.484096 | 1.386851 | 1.182672 | 1.290287 |
| Q9NZ08 | Endoplasm ERAP1 APP    | 0.573139 | 0.862763 | 0.165976 | 0.104728 | -0.40011 | -0.4975  | -0.18592 | -0.37197 | 0.163465 | 0.120956 |
| Q9NZ09 | Ubiquitin-a UBAP1 NAC  | -0.9466  | -0.93649 | -1.09432 | -0.81312 | -1.31915 | -1.04894 | -1.79085 | -1.48365 | -1.07594 | -0.84172 |
| Q9NZ32 | Actin-relate ACTR10 AC | -3.25096 | -1.99222 | -2.46529 | -1.86821 | -3.35199 | -3.23704 | -2.16227 | -3.27684 | -2.25739 | -1.64829 |
| Q9NZ45 | CDGSH iror CISD1 C10c  | 1.039396 | 1.124004 | 1.356186 | 1.104119 | 1.254868 | 1.022495 | 1.344339 | 1.234732 | 1.412426 | 1.295836 |
| Q9NZ63 | Telomere l C9orf78 HC  | 1.121991 | 1.309396 | 0.28017  | 0.068181 | 0.573794 | 0.516691 | 0.438352 | 0.571602 | 0.790908 | 0.943929 |
| Q9NZA1 | Chloride in CLIC5      | -1.46855 | -1.02359 | -0.53703 | -0.25303 | -1.03006 | -1.52083 | -0.59266 | -0.6644  | -2.3505  | -1.27191 |
| Q9NZB2 | Constitutiv FAM120A C  | 0.14358  | 0.190814 | 0.794288 | 0.597226 | 0.699523 | 0.501426 | 0.548036 | 0.599948 | 0.684113 | 0.4129   |
| Q9NZD2 | Glycolipid t GLTP      | -1.22302 | -0.84658 | -0.73355 | -0.59333 | -1.31262 | -1.04303 | -0.91125 | -0.74186 | -1.01059 | -0.91311 |
| Q9NZI7 | Upstream-l UB1 LBP1    | 0.077538 | 0.125033 | 0.14252  | 0.584738 | -0.04639 | 0.184417 | -0.01296 | 0.064252 | 0.070154 | -0.01649 |
| Q9NZJ7 | Mitochond MTCH1 PS/    | -1.04933 | -0.73697 | -0.63656 | -0.30633 | -0.16528 | -0.66069 | 0.010196 | -0.31194 | -0.60634 | -0.42392 |
| Q9NZJ9 | Diphospho NUDT4 DIP    | -1.07464 | -1.10113 | -1.82702 | -1.41495 | -1.25415 | -1.56866 | -1.49124 | -1.61588 | -1.69727 | -1.7017  |

|        |             |            |          |          |          |          |          |          |          |          |          |          |
|--------|-------------|------------|----------|----------|----------|----------|----------|----------|----------|----------|----------|----------|
| Q9NZL4 | Hsp70-binc  | HSPBP1 HS  | -1.28857 | -0.93504 | -1.16044 | -0.83848 | -1.96477 | -1.65044 | -2.1477  | -1.675   | -1.15548 | -1.12338 |
| Q9NZL9 | Methionine  | MAT2B TGI  | -0.9523  | -1.03953 | -0.85896 | 0.012491 | -0.88567 | -0.48981 | -1       | -0.79737 | -0.87368 | -0.42392 |
| Q9NZM3 | Intersectin | ITSN2 KIAA | -0.47697 | -0.65486 | -0.33662 | -0.63604 | -0.7051  | -0.98911 | -0.84493 | -0.46949 | -0.38702 | -0.50952 |
| Q9NZN8 | CCR4-NOT    | CNOT2 CDC  | -2.53727 | -1.33171 | -1.5427  | -1.71621 | -1.47063 | -0.95693 | -1.53964 | -1.23581 | -1.4892  | -1.40621 |
| Q9NZQ3 | NCK-intera  | NCKIPSD AI | -3.43539 | -2.13906 | -2.46529 | -3.14505 | -4.01495 | -3.0902  | -2.11718 | -2.65535 | -3.73383 | -2.41799 |
| Q9NZT2 | Opioid gro  | OGFR       | 0.03592  | 0.269518 | 0.027039 | 0.263034 | 0.007417 | 0.048363 | 0.218001 | -0.10692 | 0.037233 | 0.017594 |
| Q9NZZ3 | Charged m   | CHMP5 C9   | -0.08178 | -0.32226 | 0.050807 | 0.020037 | 0.129387 | 0.054109 | -0.01971 | 0.117941 | 0.375685 | 0.572723 |
| Q9P013 | Spliceosom  | CWC15 C1   | -0.60989 | -0.47069 | -0.44392 | -0.20887 | -0.39046 | -0.18641 | -0.1452  | -0.12553 | -0.54714 | -0.2717  |
| Q9P016 | Thymocyte   | THYN1 THY  | 0.902844 | 0.620143 | 0.280438 | 0.39087  | 0.795319 | 0.617885 | 0.523439 | 0.337548 | 0.731112 | 0.726135 |
| Q9P031 | Thyroid tra | CCDC59 BR  | -0.53993 | -0.70868 | -0.53319 | -0.65263 | -0.56906 | -0.50576 | -0.66802 | -0.86265 | -0.60004 | -0.31958 |
| Q9P032 | NADH dehy   | NDUFAF4 C  | 1.102362 | 1.248338 | 0.92805  | 1.105795 | 1.294905 | 1.06413  | -0.9175  | -1.04907 | -1.38329 | -1.40474 |
| Q9P0J0 | NADH dehy   | NDUFA13 C  | 2.909313 | 3.074561 | 0.236803 | 0.746967 | 0.867693 | 0.410933 | 1.65811  | 0.833292 | -0.10764 | 0.114796 |
| Q9P0J1 | [Pyruvate c | PDP1 PDP I | -1.91265 | -0.7276  | -0.7279  | -0.89148 | -1.58665 | -0.70131 | -1.13176 | -0.99277 | -1.12914 | -1.3135  |
| Q9P0L0 | Vesicle-ass | VAPA VAP3  | 1.269528 | 1.201569 | 1.515742 | 1.492132 | 1.224729 | 1.106238 | 1.328054 | 1.064275 | 1.40439  | 1.417801 |
| Q9P0P8 | Mitochond   | MTRES1 C6  | -1.80735 | -1.41244 | -1.27399 | -1.11757 | -1.55552 | -1       | -0.88216 | -1.18286 | -0.9906  | -1.3375  |
| Q9P0U4 | CXXC-type   | CXXC1 CFP  | -1.06449 | -1.1305  | -1.10084 | -1.14026 | -0.86319 | -1.00669 | -1.35827 | -1.0936  | -0.25739 | -0.4013  |
| Q9P107 | GEM-intera  | GMIP       | -0.57906 | -0.64874 | -0.27083 | -0.24558 | -0.68105 | -0.28685 | -0.38565 | -0.58496 | -0.57104 | -0.65958 |
| Q9P1F3 | Costars fan | ABRACL C6  | 1.091024 | 1.072245 | 1.627228 | 1.707179 | 1.626499 | 1.475242 | 1.487983 | 1.63743  | 1.717027 | 1.523177 |
| Q9P1W8 | Signal-regu | SIRPG SIRP | -3.29376 | -3.5893  | -2.24326 | -2.14452 | -1.10806 | -0.31647 | -2.82898 | -2.17154 | -0.72601 | -1.08194 |
| Q9P1Y6 | PHD and RI  | PHRF1 KIA  | -0.97281 | -1.34699 | -0.15962 | -0.33441 | -0.16598 | -0.25332 | 0.045247 | -0.25626 | -0.13784 | -0.14478 |
| Q9P1Z0 | Zinc finger | ZBTB4 KIA  | -3.72489 | -2.36146 | -2.26459 | -2.9386  | -2.95606 | -2.87447 | -3.23266 | -3.80735 | -2.37474 | -1.69052 |
| Q9P1Z2 | Calcium-bir | CALCOCO1   | -3.03684 | -3.24598 | -3.27058 | -3.61577 | -3.59991 | -3.04439 | -2.80511 | -3.04829 | -2.69146 | -3.62726 |
| Q9P219 | Protein Da  | CCDC88C D  | -0.51277 | -0.52669 | -0.25385 | -0.14347 | -0.15118 | -0.29578 | -0.08126 | -0.07501 | -1.18057 | -1.0726  |
| Q9P241 | Probable p  | ATP10D AT  | -1.18057 | -1.50901 | -1.31221 | -0.87971 | -1.04532 | -1.58496 | -1.34514 | -1.33342 | -1.00946 | -1.34873 |
| Q9P246 | Stromal int | STIM2 KIA  | -0.94095 | -0.78632 | -0.57228 | -0.92643 | -1.49199 | -1.43632 | -1.88539 | -1.73085 | -1.98416 | -1.92655 |
| Q9P253 | Vacuolar pi | VPS18 KIA  | -3.13993 | -2.28345 | -2.34156 | -1.89129 | -0.44337 | -0.44686 | -2.23266 | -1.97728 | -2.14886 | -3.34873 |
| Q9P258 | Protein RC  | RCC2 KIAA  | 0.275107 | 0.116077 | 0.052573 | 0.304257 | 0.158137 | 0.112777 | 0.360295 | 0.432111 | 0.297201 | 0.234295 |
| Q9P265 | Disco-inter | DIP2B KIAA | -0.28749 | -0.51457 | -1.03953 | -0.59756 | -0.19052 | -1.22422 | -0.6477  | -0.77761 | -0.50919 | -0.29888 |
| Q9P270 | SLAIN moti  | SLAIN2 KIA | -3.02916 | -2.574   | -2.26472 | -2.10409 | -2.33617 | -2.17156 | -2.53972 | -3.2077  | -2.46491 | -2.3551  |
| Q9P275 | Ubiquitin c | USP36 KIA  | -0.89262 | -1.02716 | -0.37406 | -0.79021 | -0.61929 | -0.72168 | -0.84375 | -0.66929 | -0.89178 | -0.71515 |
| Q9P289 | Serine/thre | STK26 MAS  | 0.10726  | 0.349011 | -1.11353 | -1.35364 | -0.70894 | -0.25092 | -1.55459 | -0.75811 | -0.57791 | -1.55431 |
| Q9P2A4 | ABI gene fa | ABI3 NESH  | 0.520353 | 0.611609 | 0.736344 | 0.685396 | 0.36124  | 0.514082 | 0.724409 | 0.850754 | 0.680295 | 0.577531 |
| Q9P2D3 | HEAT repe   | HEATR5B K  | 0.616935 | 0.90741  | 1.021288 | 1.058392 | 0.875821 | 1.140481 | 1.002556 | 0.659345 | 0.920032 | 0.770213 |

|        |                          |          |          |          |          |          |          |          |          |          |          |
|--------|--------------------------|----------|----------|----------|----------|----------|----------|----------|----------|----------|----------|
| Q9P2D7 | Dynein hea DNAH1 DH      | -3.30986 | -3.24598 | -3.44392 | -2.98751 | -3.69302 | -3.79647 | -3.23266 | -3.51785 | NA       | NA       |
| Q9P2E9 | Ribosome-l RRBP1 KIA     | -0.39497 | -0.38259 | -0.40153 | -0.46179 | -0.56649 | -0.26303 | -0.39808 | -0.49755 | -0.5507  | -0.67513 |
| Q9P2I0 | Cleavage ai CPSF2 CPSF   | -1.15335 | -1.41244 | -1.11353 | -1.47045 | -0.9417  | -1.44448 | -0.30786 | 0.005612 | -1.39941 | -0.93934 |
| Q9P2J5 | Leucine--tR LARS1 KIAA   | -0.56391 | -0.6323  | -0.65931 | -0.9148  | -0.56045 | -0.65855 | -1.04898 | -0.53519 | -0.53599 | -0.55221 |
| Q9P2K3 | REST corep RCOR3 KIA     | 0.116409 | 0.220163 | 0.23349  | 0.349267 | 0.394441 | 0.402689 | 0.507907 | 0.486244 | 0.581816 | 0.614168 |
| Q9P2K5 | Myelin exp MYEF2 KIA     | -0.06193 | 0.038474 | -0.62449 | -0.25303 | -0.49139 | -0.28951 | -0.25081 | -0.09464 | -0.40564 | -0.53495 |
| Q9P2N5 | RNA-bindin RBM27 KIA     | -0.62017 | -0.96841 | -0.58331 | -0.75491 | -0.76902 | -0.58701 | -0.67527 | -0.67825 | -0.84461 | -0.81737 |
| Q9P2N6 | KAT8 regul KANSL3 KIA    | -0.04933 | -0.18265 | -0.07605 | 0.031027 | -0.30529 | -0.28284 | -0.10613 | -0.11309 | -0.04307 | 0.102483 |
| Q9P2P6 | StAR-relate STARD9 KIA   | 0.488887 | 0.345135 | 0.742414 | 0.875609 | 0.748815 | 0.595851 | 0.557416 | 0.506536 | 0.193823 | 0.295128 |
| Q9P2R3 | Rabankyrin ANKFY1 AN     | -0.38702 | -0.1305  | -0.68589 | -0.62632 | -0.14079 | -0.60145 | -0.45305 | -0.58496 | -0.91754 | -0.54783 |
| Q9P2R6 | Arginine-gl RERE ARG /   | -1.92627 | -1.54331 | -1.3597  | -1.2075  | -1.12368 | -0.99878 | -1.1445  | -1.1502  | -1.07739 | -1.24248 |
| Q9P2R7 | Succinate-- SUCLA2       | 0.254929 | 0.21005  | 0.108863 | -0.23526 | -0.05302 | 0.435386 | 0.252766 | 0.490326 | 0.234465 | -0.13927 |
| Q9P2T1 | GMP reduc GMPR2          | 0.280108 | 0.23017  | -0.30738 | 0.097024 | 0.439006 | 0.277534 | 0.26559  | 0.289507 | 0.069042 | -0.22979 |
| Q9P2W9 | Syntaxin-18 STX18 GIG    | -0.94455 | -0.60643 | -0.62517 | -0.81506 | -1.39149 | -0.93409 | -0.82937 | -1.02805 | -1.19116 | -0.83355 |
| Q9UBB4 | Ataxin-10 ( ATXN10 SC    | -0.85308 | -0.94127 | -1.30513 | -1.3305  | -1.91511 | -1.48525 | -1.30345 | -0.74345 | -1.56042 | -1.33245 |
| Q9UBB5 | Methyl-Cp( MBD2          | 0.138605 | 0.09067  | 0.133954 | 0.273451 | 0.128862 | 0.222392 | 0.209007 | -0.34066 | -0.14365 | 0.060663 |
| Q9UBB9 | Tuftelin-int TFIP11 STIF | -0.90426 | -1.04617 | -0.87317 | -0.60709 | -1       | -1.0902  | -1.24473 | -1.2091  | -1.10764 | -0.84093 |
| Q9UBC2 | Epidermal   EPS15L1 EF   | -1.27558 | -0.90441 | -0.29845 | 0.016127 | -0.57703 | -0.97618 | -0.90213 | -1.03164 | -1.15755 | -1.34972 |
| Q9UBE0 | SUMO-acti SAE1 AOS1      | -0.48543 | -0.05971 | -0.39296 | -0.37788 | 0.014797 | 0.203533 | 0.050273 | 0.011405 | -0.07251 | -0.31531 |
| Q9UBF2 | Coatomer s COPG2         | -0.22315 | -0.64049 | -0.23316 | -0.70436 | -0.76647 | -0.54163 | -0.51317 | -0.35716 | -0.63062 | -0.54406 |
| Q9UBI9 | Headcase p HECA HDC      | -1.18589 | -1.33382 | -1.35882 | -1.6865  | -2.81499 | -1.30805 | -1.36178 | -2.07744 | -1.36691 | -1.55484 |
| Q9UBL3 | Set1/Ash2 ASH2L ASH      | -0.29579 | 0.204583 | -0.37784 | -0.61379 | -0.50192 | 0.11516  | 0.048418 | -0.84352 | -0.56111 | 0.070363 |
| Q9UBN7 | Histone de HDAC6 KIA     | -0.30986 | -0.43862 | -0.31706 | -0.36976 | -0.62263 | -0.52083 | -0.40484 | -0.40742 | -0.89984 | -0.7414  |
| Q9UBQ0 | Vacuolar pi VPS29 DC1    | 1.335154 | 1.270017 | 1.089166 | 0.909397 | 1.120149 | 1.190423 | 1.076522 | 0.849167 | 1.201155 | 1.035965 |
| Q9UBQ5 | Eukaryotic EIF3K EIF3S   | -0.06594 | -0.05849 | -0.03121 | -0.09572 | -0.19428 | -0.27572 | -0.32719 | -0.24048 | -0.25832 | 0.504791 |
| Q9UBQ7 | Glyoxylate GRHPR GLX     | -1.49497 | -0.66292 | -0.4206  | -0.38008 | -0.67785 | -0.51059 | -0.49195 | -0.53684 | -0.22122 | -0.20932 |
| Q9UBS0 | Ribosomal RPS6KB2 S      | 0.097503 | -0.04382 | -0.89237 | -0.69385 | -0.77439 | -0.00917 | -0.92191 | -0.65818 | -0.37963 | -0.17721 |
| Q9UBS4 | DnaJ homo DNAJB11 E      | -0.46461 | -0.36719 | -1.52015 | -0.91475 | -2.41901 | -1.50258 | -1.31937 | -1.83169 | -1.86507 | -1.8893  |
| Q9UBS8 | E3 ubiquiti RNF14 ARA    | -1.04933 | -1.02359 | -0.50348 | -0.92663 | -1.03006 | -1.01097 | -1.25691 | -1.26303 | -0.97199 | -0.55431 |
| Q9UBT2 | SUMO-acti UBA2 SAE2      | 1.19304  | 1.154401 | 1.253279 | 1.149944 | 1.079868 | 1.400621 | 1.424598 | 1.240128 | 1.291928 | 1.230588 |
| Q9UBU8 | Mortality fi MORF4L1 M   | -0.88559 | -1.18002 | -1.4761  | -1.40255 | -0.16598 | -0.64625 | -0.74408 | -0.50793 | -1.79796 | -2.0268  |
| Q9UBU9 | Nuclear RN NXF1 TAP      | -1.57289 | -1       | -1.2276  | -0.72655 | -1.12418 | -0.90484 | -1.08427 | -1.46949 | -1.28011 | -1.00888 |
| Q9UBV8 | Peflin (PEF PEF1 ABP3:   | -1.15708 | -0.20168 | -0.25802 | -0.31489 | -0.21688 | -0.27814 | 0.010428 | 0.014351 | -0.04314 | -0.049   |

|        |                        |          |          |          |          |          |          |          |          |          |          |
|--------|------------------------|----------|----------|----------|----------|----------|----------|----------|----------|----------|----------|
| Q9UBW5 | Bridging int BIN2 BRAP | 0.26     | 0.216811 | -0.68046 | -0.20163 | -0.07397 | -0.37197 | -0.34142 | -0.29078 | -0.62572 | -0.20874 |
| Q9UBW7 | Zinc finger ZMYM2 FIM  | -1.82873 | -3.57719 | -2.26459 | -2.63604 | -3.07635 | -3.34395 | -3.05209 | -2.93289 | -3.1281  | -1.73402 |
| Q9UBW8 | COP9 signa COPS7A CS   | -1.85042 | -1.77649 | -1.7112  | -2.84549 | -2.47063 | -1.635   | -1.71329 | -1.27684 | -1.28011 | -1.77887 |
| Q9UDY8 | Mucosa-as: MALT1 ML    | 0.187331 | 0.363436 | -0.20046 | -0.15899 | -0.44004 | -0.54455 | -0.5175  | -0.56789 | -0.5639  | -0.54783 |
| Q9UEE9 | Craniofacia CFDP1 BCN  | -0.06827 | -0.40726 | -0.09259 | 0.006259 | 0.161638 | 0.084889 | -0.51019 | 0.033947 | 0.238467 | 0.409495 |
| Q9UER7 | Death dom DAXX BING    | -1.18748 | -1.38339 | -1.01657 | -1.09819 | -1.24236 | -0.83494 | -1.18536 | -1.035   | -1.10372 | -0.88064 |
| Q9UEW8 | STE20/SPS: STK39 SPAI  | 0.475295 | 0.449437 | 0.154338 | 0.276906 | 0.087301 | 0.874401 | 0.290774 | 0.244178 | 0.250592 | -0.07637 |
| Q9UEY8 | Gamma-ad ADD3 ADDI     | 0.281342 | 0.257097 | 0.534999 | 0.64235  | 0.843031 | 0.676373 | 0.990996 | 0.995625 | 1.020461 | 0.997786 |
| Q9UFC0 | Leucine-ric LRWD1 CEI  | -1.55497 | -1.33171 | -1.35147 | -1.17306 | -1.29613 | -1.83494 | -1.74723 | -1.36257 | -0.98126 | -1.14906 |
| Q9UFG5 | UPF0449 p C19orf25     | -3.5025  | -2.50901 | -2.03953 | -1.59756 | -2.59991 | -2.83494 | -3.68012 | -3.22239 | -2.39941 | -1.74882 |
| Q9UFW8 | CGG triplet CGGBP1 CC  | -0.55031 | -0.83789 | -0.25526 | -0.57721 | -0.5231  | -0.5366  | -0.43219 | -0.61096 | -0.14365 | -0.23038 |
| Q9UG22 | GTPase IM: GIMAP2 IM   | -0.28018 | -0.25751 | -0.42726 | -0.42417 | -1.13501 | -0.66935 | -0.63971 | -0.71989 | -1.07748 | -1.04495 |
| Q9UG63 | ATP-bindin ABCF2 HUS   | 0.213707 | 0.310969 | 0.118692 | -0.09823 | 0.245577 | 0.223384 | 0.244153 | 0.419325 | 0.189695 | -0.10721 |
| Q9UGI8 | Testin (TES TES        | 1.082462 | 0.984318 | 1.025851 | 1.209792 | 1.04885  | 1.172352 | 1.057665 | 1.123382 | 1.22037  | 1.130475 |
| Q9UGJ1 | Gamma-tul TUBGCP4 7    | -0.75527 | -0.45457 | -1.88825 | -1.94585 | -2.06754 | -2.26758 | -2.17381 | -2.37255 | -0.20211 | -0.27191 |
| Q9UGM6 | Tryptophar WARS2       | -0.70763 | -0.65193 | -0.30562 | -0.34055 | -0.91688 | -0.58171 | -1.04934 | -0.96193 | -0.69568 | -0.60943 |
| Q9UGN4 | CMRF35-lik CD300A CN   | 0.076726 | 0.186295 | 0.332805 | 0.257798 | -0.19052 | 0.208271 | 0.074768 | 0.039528 | -0.50919 | -0.12956 |
| Q9UGP4 | LIM domai LIMD1        | -0.88785 | -1.29298 | -1.30256 | -1.26053 | -1.31451 | -0.95693 | -0.7997  | -1.42269 | -1.43721 | -0.82517 |
| Q9UGP8 | Translocati SEC63 SEC6 | -0.57176 | -0.65096 | -1.41473 | -1.12367 | -1.08119 | -1.12351 | -0.16566 | -0.71299 | -0.88088 | -0.99672 |
| Q9UGU0 | Transcripti TCF20 KIAA | -0.83954 | -0.54839 | -0.33662 | -0.0973  | -0.04532 | -0.35091 | -0.26303 | -0.38482 | -0.31487 | -0.06796 |
| Q9UGV2 | Protein ND NDRG3       | -0.96079 | -0.72587 | -0.4352  | -0.14073 | -0.72624 | -0.62356 | -0.64592 | -0.52102 | -0.47985 | -0.3273  |
| Q9UH62 | Armadillo r ARMCX3 AI  | -1.58425 | -2.38178 | -0.0516  | -0.44461 | -0.10007 | -0.22422 | -0.23266 | -0.07641 | -2.64539 | -2.35155 |
| Q9UH65 | Switch-assc SWAP70 KI  | -0.82873 | -0.7112  | -0.20495 | 0.299168 | -0.59991 | 0.150363 | -0.12832 | -0.27684 | 0.104556 | 0.127005 |
| Q9UH99 | SUN domai SUN2 FRIGI   | 0.440573 | 0.411133 | 0.157321 | 0.433084 | -0.38567 | -0.36792 | 0.244153 | -0.1155  | -1.06365 | -1.11032 |
| Q9UHA2 | SS18-like p SS18L2     | -1.46855 | -1.5541  | -1.16506 | -0.92663 | -1.07635 | -1.12553 | -1.63176 | -0.54265 | -1.52947 | -0.84093 |
| Q9UHA3 | Probable ri RSL24D1 C: | -0.23193 | -0.17535 | -0.32756 | -0.24847 | -0.64489 | -0.61364 | -0.56994 | -0.28855 | -0.45929 | -0.08922 |
| Q9UHA4 | Ragulator c LAMTOR3 I  | -0.5639  | -0.92405 | -1.78991 | -0.95067 | -1.57755 | -1.18641 | -0.80863 | -1.45372 | -0.88235 | -0.70487 |
| Q9UHB6 | LIM domai LIMA1 EPLI   | -0.86139 | -0.37242 | 0.342576 | 0.378212 | -0.10477 | -0.20519 | -0.45305 | -0.22577 | -0.16463 | 0.017594 |
| Q9UHB9 | Signal reco SRP68      | -0.30236 | -0.38672 | -0.34149 | -0.07174 | -0.45895 | -0.37138 | -0.39731 | -0.71296 | -0.59918 | -0.69768 |
| Q9UHD1 | Cysteine ar CHORDC1 C  | 0.646922 | 0.593761 | 0.730572 | 0.77102  | 0.738919 | 0.716521 | 0.735246 | 0.798972 | 0.888932 | 0.980057 |
| Q9UHD2 | Serine/thre TBK1 NAK   | -0.69515 | -0.90202 | -0.58301 | -0.27563 | -0.76702 | -1.17403 | -0.7997  | -0.72935 | -0.95361 | -0.71937 |
| Q9UHD8 | Septin-9 (N SEPTIN9 KI | 0.226807 | 0.127049 | 0.302947 | -0.06594 | 0.2539   | 0.555519 | 0.521787 | 0.478047 | 0.417202 | 0.378436 |
| Q9UHG3 | Prenylcyste PCYOX1 KI  | -0.19095 | -0.27325 | -0.29678 | -0.40886 | -0.50771 | -0.14958 | -0.06587 | -0.22249 | -0.40564 | -0.41209 |



|        |                         |          |          |          |          |          |          |          |          |          |          |
|--------|-------------------------|----------|----------|----------|----------|----------|----------|----------|----------|----------|----------|
| Q9UHH6 | Sedoheptu SHPK CARK     | 0.275107 | 0.26628  | -1.43763 | -1.93261 | 0.258068 | 0.334984 | 0.500694 | 0.415037 | 0.018737 | -0.05411 |
| Q9UHL4 | Dipeptidyl DPP7 DPP2    | -0.5649  | -0.44893 | -0.78705 | -0.79594 | -1.82286 | -1.1366  | -0.66382 | -1.12419 | -1.02177 | -0.82653 |
| Q9UHP3 | Ubiquitin c USP25 USP   | -0.57289 | -0.57719 | 0.169058 | 0.097024 | 0.114333 | 0.135515 | -0.28157 | 0.088809 | 0.320041 | 0.131052 |
| Q9UHQ9 | NADH-cyto CYB5R1 NC     | -0.84968 | -1.27316 | -1.24143 | -0.99766 | -1.74926 | -1.31174 | -1.23718 | -1.03453 | -1.51485 | -1.75158 |
| Q9UHR5 | SAP30-binc SAP30BP H    | -1.68536 | -1.13906 | -1.24598 | -1.23078 | -2.64572 | -1.91511 | -1.23236 | -1.38717 | -1.01898 | -1.59384 |
| Q9UHV9 | Prefoldin s1 PFDN2 PFD  | 0.572857 | 0.538714 | 0.793008 | 0.518683 | 0.812591 | 0.383563 | 0.644635 | 0.748213 | 0.886831 | 0.857914 |
| Q9UHW9 | Solute carr SLC12A6 K   | -1.29775 | -1.62876 | -1.8868  | -1.73289 | -0.1161  | 0.212994 | 0.150467 | -0.20249 | -0.90425 | -1.23342 |
| Q9UHX1 | Poly(U)-bin PUF60 FIR I | 0.059379 | 0.220163 | 0.057095 | 0.067399 | -0.12418 | 0.074547 | 0.338342 | -0.12553 | -0.24284 | -0.14906 |
| Q9UHY1 | Nuclear rec NRBP1 BCC   | -0.29272 | -0.2532  | -0.36146 | -0.3377  | -0.21206 | -0.25603 | -0.20291 | -0.50155 | -0.13845 | -0.34535 |
| Q9UHY7 | Enolase-ph ENOPH1 M     | -1.27228 | -0.66388 | -1.26012 | -1.16938 | -1.33638 | -1.3073  | -1.2713  | -1.27412 | -2.11382 | -2.19285 |
| Q9UI08 | Ena/VASP-I EVL RNB6     | -0.04933 | -0.63656 | -0.28409 | -0.55951 | -0.39377 | -0.1375  | -0.41489 | -0.19594 | -0.09455 | -0.25022 |
| Q9UI09 | NADH dehy NDUFA12 I     | 0.348875 | 0.758055 | 0.475797 | 0.468367 | 0.304457 | 0.53255  | 0.188239 | 0.42731  | 0.55864  | 0.507517 |
| Q9UI10 | Translation EIF2B4 EIF2 | 0.090696 | 0.00458  | -0.25058 | -0.08866 | -0.35565 | -0.13559 | 0.063701 | -0.44807 | -0.30584 | -0.47254 |
| Q9UI12 | V-type prot ATP6V1H C   | 0.183777 | 0.141512 | -0.29252 | -0.00256 | -0.06182 | 0.075377 | -0.16716 | 0.030082 | -0.15148 | -0.26862 |
| Q9UI30 | Multifuncti TRMT112 A   | -1.28011 | -1.25526 | -0.30256 | -0.18728 | -0.27798 | 0.304334 | -0.22069 | 0.061639 | 0.293359 | 0.122947 |
| Q9UIA0 | Cytohesin-1 CYTH4 CYT   | -0.58193 | -0.4761  | -0.7112  | -0.79021 | -1       | -0.66935 | -0.56212 | -0.76783 | -1.08746 | -0.71937 |
| Q9UIA9 | Exportin-7 XPO7 KIAA    | -0.33258 | -0.18265 | -0.15634 | -0.11757 | -0.12418 | -0.33015 | -0.18536 | 0.050626 | 0.095759 | 0.047877 |
| Q9UIC8 | Leucine car LCMT1 LCN   | -1.80549 | -1.63174 | -1.48154 | -2.36658 | -0.269   | -0.78701 | -2.15468 | -2.23311 | -2.11094 | -2.06428 |
| Q9UID3 | Vacuolar pi VPS51 ANG   | -2.76553 | -3.83094 | -2.35304 | -2.3683  | -2.7469  | -2.8016  | -2.06311 | -2.65751 | -3.45003 | -3.44184 |
| Q9UIF9 | Bromodom BAZ2A KIAA     | -1.74851 | -1.06733 | -1.04757 | -1.23078 | -1.47063 | -0.92545 | -2.21192 | -2.05787 | -1.83976 | -2.21621 |
| Q9UIG0 | Tyrosine-pi BAZ1B WB    | -0.47697 | -0.34651 | -0.72403 | -0.53261 | -0.54463 | -0.5366  | -0.74887 | -0.58886 | -0.7327  | -0.88112 |
| Q9UII2 | ATPase inh ATP5IF1 AT   | -0.08746 | 0.151728 | 0.540081 | 0.4899   | 0.411441 | 0.393625 | 0.352302 | 0.465664 | 0.625644 | 0.602557 |
| Q9UIJ7 | GTP:AMP pi AK3 AK3L1    | -0.04373 | -0.07735 | 0.544082 | 0.660337 | 0.662182 | 0.565266 | 0.989732 | 0.545045 | 0.8459   | 0.650939 |
| Q9UIL8 | PHD finger PHF11 BCA    | 0.160465 | 0.236803 | 0.658443 | 0.593302 | 0.476903 | 0.343623 | 0.529334 | 0.51056  | 0.202044 | 0.468255 |
| Q9UIQ6 | Leucyl-cyst LNPEP OTA   | -0.23816 | -0.2262  | -0.45451 | -0.97592 | -0.36151 | -0.11376 | -0.41346 | -0.45483 | 0.069205 | -0.00339 |
| Q9UIS9 | Methyl-Cp MBD1 CXXI     | -0.83954 | -0.67963 | -1.72403 | -1.67557 | -1.59991 | -2.06711 | -0.97968 | -1.36257 | -1.81444 | -1.69052 |
| Q9UIV1 | CCR4-NOT CNOT7 CAF      | -0.34023 | -0.65486 | -0.35147 | -0.39428 | -0.39046 | -0.2115  | -0.62385 | -0.40742 | -0.45649 | -0.52855 |
| Q9UJ41 | Rab5 GDP/ RABGEF1 R     | -1.15335 | -1.14399 | -1.03156 | -1.17334 | -0.6655  | -0.78163 | -1.62301 | -1.20191 | -1.15997 | -1.14629 |
| Q9UJ70 | N-acetyl-D- NAGK        | 0.431612 | 0.414062 | -0.29776 | -0.55087 | -0.5231  | -0.60302 | -0.87276 | -0.50967 | -0.71049 | -0.47836 |
| Q9UJA5 | tRNA (ader TRMT6 KIA    | -0.40426 | -0.32822 | -0.34661 | -0.26974 | -0.01925 | 0.159762 | -0.15499 | 0.210376 | 0.171262 | 0.15341  |
| Q9UJC3 | Protein Ho HOOK1        | -1.57289 | -0.92405 | -0.85896 | -0.96285 | -0.14048 | -0.67807 | -0.76451 | -1.08246 | -0.36864 | -0.51584 |
| Q9UJU2 | Lymphoid e LEF1         | -2.0377  | -1.69816 | -1.32134 | -1.66671 | -1.36981 | -1.23606 | -0.62363 | -0.78294 | -0.69363 | -0.7762  |
| Q9UJU6 | Drebrin-like DBNL CMA   | -0.74507 | -0.6245  | -0.53138 | -0.69574 | -0.45678 | -0.46385 | -0.63176 | -0.65535 | -0.29739 | -0.51584 |

|        |                                   |          |          |          |          |          |          |          |          |          |          |
|--------|-----------------------------------|----------|----------|----------|----------|----------|----------|----------|----------|----------|----------|
| Q9UJW0 | Dynactin st DCTN4                 | -0.8858  | -0.62539 | -0.40551 | -0.46799 | -0.65194 | -0.28821 | -0.44799 | -0.63054 | -0.32274 | -0.16399 |
| Q9UJX3 | Anaphase- $\gamma$ ANAPC7 AF      | -0.45187 | -0.26459 | -0.15421 | -0.3601  | -0.71727 | -0.10188 | -0.35165 | -0.17638 | -0.5639  | -0.08663 |
| Q9UJY4 | ADP-ribosy GGA2 KIAA              | -0.818   | -0.36146 | 0.042266 | 0.507657 | -0.53382 | -0.5366  | -0.80863 | -0.95491 | -0.75754 | -0.14906 |
| Q9UJY5 | ADP-ribosy GGA1                   | 1.119203 | 1.155119 | 1.518467 | 1.190684 | 1.330824 | 1.147899 | 1.173332 | 1.308122 | 1.591235 | 1.219228 |
| Q9UJZ1 | Stomatin-li STOML2 SL             | -0.63743 | -0.46371 | -0.52015 | -0.71621 | -0.25118 | -0.14353 | -0.59266 | -0.61096 | -0.43879 | -0.81735 |
| Q9UK41 | Vacuolar pi VPS28                 | -1.44741 | -0.98964 | -1.5784  | -1.79478 | -1.76304 | -1.90779 | -1.64654 | -0.92564 | -1.64848 | -1.59484 |
| Q9UK45 | U6 snRNA-i LSM7                   | 0.780099 | 0.91951  | 0.897065 | 0.830467 | 0.903913 | 0.887557 | 0.761315 | 0.820382 | 1.014075 | 0.916963 |
| Q9UK53 | Inhibitor of ING1                 | -0.74507 | -0.52576 | -0.10932 | -0.51457 | -0.36151 | -0.78701 | -0.53222 | -0.71049 | -0.49584 | -0.36004 |
| Q9UK59 | Lariat debr DBR1                  | -1.35566 | -1.03953 | -1.42286 | -1.71621 | -1.62263 | -1.58496 | -1.63176 | -1.50155 | -1.25739 | -1.20918 |
| Q9UK61 | Protein TA <sup>1</sup> TASOR C3o | -2.35705 | -2.28291 | -2.95334 | -2.02401 | -2.4769  | -2.73479 | -1.33727 | -2.30541 | -2.33151 | -2.22121 |
| Q9UK76 | Jupiter mic JPT1 ARM2             | -0.19438 | 0.061076 | 0.075949 | 0.079322 | -0.41009 | -0.26303 | 0.010196 | -0.1571  | -0.00472 | -0.26127 |
| Q9UK99 | F-box only FBXO3 FBX              | -1.1439  | -0.46489 | -0.3998  | -0.20019 | -0.89894 | -1.32105 | -0.57098 | -0.70794 | -0.94585 | -1.01119 |
| Q9UKA4 | A-kinase ar AKAP11 AK             | -0.69515 | -0.06786 | 0.735405 | 0.974689 | -0.23359 | -0.07285 | -0.02061 | -0.31907 | 0.266174 | 0.039289 |
| Q9UKA8 | Calcipressin RCAN3 DSC            | -0.87245 | -0.93147 | -0.7632  | -0.59756 | -0.42    | -0.28951 | -0.61599 | -0.90046 | -0.41818 | -0.04039 |
| Q9UKD1 | Glucocortic GMEB2 KIA             | -0.6668  | -0.6915  | -0.50357 | -0.52879 | -0.56603 | -0.34743 | -0.39645 | -0.55684 | -0.10628 | -0.19822 |
| Q9UKD2 | mRNA turn MRTO4 C1c               | 1.163174 | 1.2824   | 1.036575 | 1.326937 | 0.855414 | 1.277534 | 1.198071 | 1.042311 | 1.329452 | 1.372371 |
| Q9UKE5 | TRAF2 and TNIK KIAA0              | -1.17763 | -0.84582 | -0.65486 | -0.70594 | -1.14048 | -0.71348 | -1.51019 | -1.05842 | -0.93546 | -0.7713  |
| Q9UKF6 | Cleavage ai CPSF3 CPSF            | -1.28011 | -1.09675 | -1.25526 | -1.67557 | -1.22487 | -1.0902  | -1.58496 | -1.19592 | -1.30319 | -0.84888 |
| Q9UKF7 | Cytoplasmic PITPNC1               | 0.371969 | 0.618366 | -0.40726 | -0.89129 | -0.53382 | -1.17403 | -0.50293 | -0.52607 | -0.80618 | -0.63448 |
| Q9UKG1 | DCC-intera APPL1 APP              | 0.213707 | 0.532014 | 0.507538 | 0.329436 | 0.336725 | 0.510195 | 0.155069 | 0.067114 | 0.553184 | 0.670863 |
| Q9UKG9 | Peroxisom $\alpha$ CROT COT       | -1.53727 | -0.65486 | -0.08017 | 0.622115 | -0.84503 | -0.80599 | -1.10613 | -1.97728 | -1.2916  | -1.16882 |
| Q9UKI8 | Serine/thre TLK1 KIAAC            | -2.76553 | -1.39183 | -1.02359 | -1.30633 | -1.24236 | -1.07861 | -1.31937 | -1.29078 | -1.00946 | -0.71937 |
| Q9UKJ3 | G patch do GPATCH8 C              | -0.32476 | -0.0798  | -0.33284 | -0.32189 | -0.10031 | -0.2581  | -0.37792 | 0.016784 | 0.290707 | 0.076537 |
| Q9UKK3 | Protein mo PARP4 ADP              | 0.989171 | 1.113457 | 1.308255 | 1.068386 | 1.012437 | 1.152971 | 1.08747  | 1.074605 | 1.193219 | 1.153511 |
| Q9UKK9 | ADP-sugar NUDT5 NU                | 0.501787 | 0.553427 | 0.474243 | 0.037153 | 0.18799  | -0.22422 | -0.12274 | 0.152003 | 0.304855 | 0.896825 |
| Q9UKM9 | RNA-bindin RALY HNRP              | 0.976751 | 1.060708 | 1.007777 | 1.140352 | 1.134797 | 1.027068 | 0.775632 | 0.669052 | 0.643356 | 0.651707 |
| Q9UKN8 | General tra GTF3C4                | 0.224123 | 0.332805 | 0.027039 | -0.45317 | 0.276604 | -0.11958 | 0.186878 | 0.094182 | 0.281771 | -0.08194 |
| Q9UKT9 | Zinc finger IKZF3 ZNFN            | 0.211201 | 0.18253  | 0.100744 | -0.09088 | 0.084136 | 0.272852 | 0.225173 | 0.275065 | 0.22964  | 0.178934 |
| Q9UKU7 | Isobutyryl-i ACAD8 ARC            | -1.80735 | -1.16506 | -0.87317 | -1.4361  | -1.41009 | -1.50524 | -1.87276 | -1.82753 | -1.7028  | -1.03585 |
| Q9UKV3 | Apoptotic c ACIN1 ACIN            | -0.33943 | -0.09259 | 0.019365 | 0.421296 | -0.06075 | -0.21887 | -0.01027 | -0.02843 | 0.327575 | 0.250314 |
| Q9UKV8 | Protein arg AGO2 EIF2c            | 1.038363 | 1.065901 | 0.761764 | 0.741973 | 0.753254 | 0.893001 | 0.996348 | 0.72316  | 1.112733 | 1.063832 |
| Q9UKX7 | Nuclear po NUP50 NP/              | -0.13327 | 0.130397 | 0.238196 | 0.373605 | 0.107446 | 0.122533 | -0.16811 | -0.02843 | 0.377413 | 0.393177 |
| Q9UKY7 | Protein CD' CDV3 H41              | 0.44053  | 0.512758 | 0.570836 | 0.393885 | 0.409507 | 0.459214 | 0.524521 | 0.530206 | 0.691159 | 0.97472  |

|        |                        |          |          |          |          |          |          |          |          |          |          |
|--------|------------------------|----------|----------|----------|----------|----------|----------|----------|----------|----------|----------|
| Q9UKZ1 | CCR4-NOT CNOT11 C2     | -0.78629 | -0.50901 | -0.4021  | -0.55087 | -0.19052 | -0.40777 | -0.84493 | -0.46949 | -0.65006 | -0.66223 |
| Q9UL15 | BAG family BAG5 KIAA   | -0.10692 | -0.1782  | -0.3971  | -0.28325 | -0.12138 | -0.45656 | -0.16722 | -0.12339 | -0.2486  | -0.07977 |
| Q9UL17 | T-box trans TBX21 TBE  | -2.77502 | -1.59504 | -1.85812 | -1.4397  | -2.34206 | -2.07058 | -1.3567  | -1.46983 | -2.52767 | -1.76471 |
| Q9UL18 | Protein arg AGO1 EIF2  | -1.34023 | -1.15634 | -1.16212 | -0.96799 | -1.56653 | -1.11138 | -1.5327  | -1.32169 | -1.15548 | -0.925   |
| Q9UL25 | Ras-relatec RAB21 KIA  | 0.285091 | -0.23676 | -0.12199 | -0.15899 | -0.24236 | -0.41504 | -0.27537 | -0.95491 | -1.11469 | -1.24036 |
| Q9UL26 | Ras-relatec RAB22A RA  | 1.686383 | 1.484034 | 1.497906 | 1.15451  | 1.327865 | 1.467359 | 1.467779 | 1.406424 | 1.141356 | 1.133071 |
| Q9UL33 | Trafficking TRAPPC2L I | -1.40296 | -0.96153 | -1.5541  | -1.05107 | -2.59991 | -1.34395 | -1.23266 | -0.95491 | -1.74959 | -1.37145 |
| Q9UL40 | Zinc finger ZNF346 JA  | -1.30986 | -1.53138 | -0.16506 | -0.71621 | -0.33313 | -0.69567 | -0.4957  | -0.10692 | 0.06454  | 0.094215 |
| Q9UL46 | Proteasom PSME2        | 1.180052 | 1.149015 | 1.219133 | 0.946186 | 0.799724 | 0.838054 | 1.16389  | 1.217779 | 1.331454 | 1.303036 |
| Q9ULA0 | Aspartyl an DNPEP ASP  | 0.680435 | 0.955786 | -0.80578 | -0.98966 | -0.33743 | -0.42712 | -0.39316 | -0.82446 | -0.56063 | -0.58238 |
| Q9ULC4 | Malignant MCTS1 MC     | 1.129367 | 1.115915 | 0.999389 | 0.985399 | 0.894618 | 1.142548 | 1.157299 | 1.16804  | 1.029458 | 0.905603 |
| Q9ULC5 | Long-chain ACSL5 ACS   | -1.40296 | -1.3423  | -1.41641 | -2.44181 | -2.42776 | -2.08945 | -1.59218 | -1.39122 | -1.4119  | -1.84093 |
| Q9ULD4 | Bromodom BRPF3 KIA     | -1.12663 | -1.66102 | -1.52015 | -2.8011  | -2.69302 | -1.93587 | -1.52484 | -1.76783 | -1.76553 | -1.16882 |
| Q9ULG1 | Chromatin- INO80 INO   | 0.690145 | 0.819558 | -0.16069 | 0.538214 | -0.06075 | -0.03877 | 0.500694 | -0.1193  | 0.046393 | -0.40036 |
| Q9ULH1 | Arf-GAP wi ASAP1 DDE   | -1.40811 | -1.43713 | -0.93511 | -1.31111 | -0.98427 | -1.27008 | -1.25534 | -1.11663 | -1.59508 | -1.31964 |
| Q9ULK4 | Mediator o MED23 AR    | -1.70486 | -1.51834 | -1.87112 | -2.36188 | -2.00934 | -2.25262 | -1.51322 | -1.35614 | -1.66009 | -1.7002  |
| Q9ULR0 | Pre-mRNA- ISY1 KIAA1   | -0.16061 | -0.14194 | 0.268171 | 0.106585 | -0.05149 | 0.062979 | 0.077485 | 0.190044 | 0.259356 | 0.441045 |
| Q9ULT8 | E3 ubiquiti HECTD1 KI  | -1.21371 | -0.87437 | -0.77361 | -0.87131 | -1.14412 | -1.02541 | -1.16793 | -1.04819 | -1.20841 | -0.69316 |
| Q9ULU4 | Protein kin ZMYND8 KI  | -1.04933 | -1.17383 | -1.82219 | -1.95195 | -1.59991 | -1.05571 | -1.58496 | -1.09464 | -0.96277 | -1.1589  |
| Q9ULV3 | Cip1-intera CIZ1 LSF   | -1.85135 | -2.28193 | -1.24209 | -2.06667 | -2.10432 | -2.13911 | -1.82766 | -1.74259 | -3.79796 | -3.70487 |
| Q9ULV4 | Coronin-1C CORO1C CF   | -1.30285 | -0.59145 | -0.71764 | -0.8001  | 1.18799  | 1.360747 | -0.76467 | -0.64057 | 1.147754 | 1.054284 |
| Q9ULW3 | Activator o ABT1       | -1.30929 | -1.18122 | -1.35327 | -1.25028 | -0.83642 | -1.23573 | -1.19119 | -1.45114 | -1.24644 | -1.27035 |
| Q9ULX6 | A-kinase ar AKAP8L NA  | -1.13128 | -1.00098 | -0.87056 | -0.85175 | -0.9067  | -1.03223 | -0.42602 | -0.79352 | -1.23799 | -0.70338 |
| Q9ULZ3 | Apoptosis-i PYCARD AS  | 0.044426 | 0.470458 | -0.2014  | 0.40199  | 0.00933  | -0.21028 | -0.20608 | -0.47213 | -0.62785 | 0.293648 |
| Q9UM00 | Calcium loz TMCO1 TM   | -1.74507 | -1.81714 | -2.64874 | -3.52356 | -3.01495 | -3.72247 | -1.48134 | -3.58496 | -3.45003 | -4.34873 |
| Q9UM54 | Unconvent MYO6 KIAA    | 2.189991 | 3.113376 | 3.492026 | 4.331618 | 3.014797 | 2.451461 | 2.71843  | 0.633745 | 2.377423 | 2.384287 |
| Q9UMR2 | ATP-depen DDX19B DE    | -0.62185 | -0.81371 | 0.967917 | 0.636291 | 0.463268 | 0.129399 | 1.141492 | 0.640989 | 0.648312 | 0.463627 |
| Q9UMS0 | NFU1 iron- NFU1 HIRIF  | -0.41908 | -0.1305  | 0.269518 | 0.198904 | 0.072512 | -0.01097 | -0.04152 | 0.141661 | 0.323813 | 0.493622 |
| Q9UMS4 | Pre-mRNA- PRPF19 NV    | 0.506121 | 0.652271 | 0.624455 | 0.601001 | 0.766171 | 0.743293 | 0.669286 | 0.790642 | 0.816744 | 0.909837 |
| Q9UMX5 | Neudesin ( NENF CIR2   | -0.26943 | -0.27231 | -0.71858 | -0.55522 | -0.72676 | -0.95013 | -0.70278 | -0.83676 | -0.44094 | -0.17197 |
| Q9UMY1 | Nucleolar p NOL7 C6or  | -1.2949  | -0.93892 | -0.59474 | -1.5787  | -1       | -0.35091 | -0.76451 | -0.90046 | -0.71823 | -0.75627 |
| Q9UMY4 | Sorting nex SNX12      | 1.533542 | 1.263034 | 1.383004 | 1.316901 | 1.100527 | 1.189226 | 1.193604 | 1.251539 | 1.732716 | 1.596716 |
| Q9UMZ2 | Synergic gz SYNRG AP1  | -1.32219 | -1.46529 | -0.72374 | -1.28053 | -0.91348 | -1.52083 | -1.52484 | -1.848   | -1.32665 | -0.69932 |

|        |              |            |          |          |          |          |          |          |          |          |          |          |
|--------|--------------|------------|----------|----------|----------|----------|----------|----------|----------|----------|----------|----------|
| Q9UN37 | Vacuolar pi  | VPS4A VPS  | -0.04933 | -0.0843  | 0.158617 | 0.241973 | -0.15697 | 0.165059 | 0.186878 | 0.172467 | -0.3445  | -0.25597 |
| Q9UN86 | Ras GTPase   | G3BP2 KIA  | -0.41908 | -0.46529 | -0.35147 | -0.07731 | -0.32379 | 0.079727 | -0.75585 | -0.30485 | -0.23502 | -0.2507  |
| Q9UNE7 | E3 ubiquiti  | STUB1 CHII | -1.25096 | -1.4021  | -1.61252 | -0.85681 | -1.57755 | -1.48981 | -0.77323 | -0.96605 | -1.97199 | -1.27191 |
| Q9UNF0 | Protein kin  | PACSIN2    | 0.181998 | -0.17383 | 0.130397 | -0.38839 | -0.03388 | 0.595851 | 0.145851 | -0.10365 | 0.756633 | 0.245238 |
| Q9UNF1 | Melanoma     | MAGED2 B   | -0.87245 | -0.88753 | -0.49796 | -0.55855 | -0.81855 | -0.26874 | -1       | -0.24257 | -0.29739 | -0.06333 |
| Q9UNH7 | Sorting nex  | SNX6       | 0.039714 | -0.13725 | 0.130397 | 0.073373 | -0.16528 | -0.07015 | 0.054093 | -0.1193  | 0.078016 | -0.03132 |
| Q9UNL2 | Translocon   | SSR3 TRAP  | -0.92659 | -1.17889 | 1.246696 | 1.15451  | 0.476903 | 0.727095 | 1.348289 | 0.810623 | 0.13493  | 0.251185 |
| Q9UNM6 | 26S protea   | PSMD13     | -0.06827 | 0.786031 | -0.20495 | -0.30633 | -0.4828  | -0.52869 | -0.69297 | -0.53434 | -0.5639  | -0.62716 |
| Q9UNN5 | FAS-associ   | FAF1 UBXD  | -0.45738 | 0.058466 | -0.35224 | -0.51393 | -0.0532  | -0.3621  | -0.2456  | -0.47055 | 0.020086 | 0.027109 |
| Q9UNP9 | Peptidyl-pr  | PPIE CYP33 | -0.52146 | -0.29621 | -0.32205 | -0.53177 | -0.44649 | -0.50107 | -0.22555 | -0.15308 | -0.01688 | -0.17591 |
| Q9UNQ2 | Probable d   | DIMT1 DIM  | 0.44977  | 0.431792 | 0.378153 | 0.062527 | 0.529224 | 0.253593 | 0.168436 | 0.095233 | 0.458163 | 0.546342 |
| Q9UNS2 | COP9 signa   | COPS3 CSN  | 0.353079 | 0.475645 | 0.570854 | 0.289886 | 0.486926 | 0.583415 | 0.335903 | 0.621751 | 0.575114 | 0.734927 |
| Q9UNX4 | WD repeat    | WDR3       | -0.90613 | -1.14768 | -1.08331 | -1.35801 | -0.83173 | -0.56058 | -0.44743 | -0.83907 | -1.08746 | -0.72668 |
| Q9UNZ2 | NSFL1 cofa   | NSFL1C UB  | 0.029995 | -0.04354 | -0.08844 | -0.09457 | 0.120035 | -0.15565 | -0.07346 | -0.26303 | 0.162386 | 0.355175 |
| Q9UNZ5 | Leydig cell  | C19orf53 H | 0.997877 | 0.868778 | 1.444444 | 1.45135  | 1.826897 | 1.761363 | 1.357915 | 1.448453 | 1.429478 | 1.216617 |
| Q9UP83 | Conserved    | COG5 GOL   | -2.4265  | -2.53704 | -1.1305  | -0.67557 | -1.51245 | -0.86449 | -1.13955 | -1.69188 | -1.51592 | -1.01781 |
| Q9UPN3 | Microtubul   | MACF1 ABF  | -0.5639  | -0.4012  | -0.21738 | -0.18015 | -0.35199 | -0.35091 | -0.43219 | -0.46158 | -0.45649 | -0.62425 |
| Q9UPN6 | SR-related   | SCAF8 CCA  | -0.57519 | -0.80185 | -0.2112  | -0.35412 | -0.5605  | -0.43856 | -0.67755 | -0.40813 | -0.4362  | -0.12357 |
| Q9UPN7 | Serine/thre  | PPP6R1 KIA | -0.81291 | -0.98616 | -1.03284 | -0.83996 | -0.79304 | -1.30003 | -1.20582 | -1.22338 | -1.08698 | -0.69769 |
| Q9UPN9 | E3 ubiquiti  | TRIM33 KIA | -0.82873 | -0.41764 | 0.443033 | -0.11757 | 0.67155  | 0.250227 | 0.079617 | 0.232173 | 0.368321 | 0.515458 |
| Q9UPP1 | Histone lys  | PHF8 KIAA  | -0.63743 | -0.64874 | -0.83789 | -0.71621 | -0.06853 | -0.46697 | -0.61599 | -0.55943 | -0.1281  | -0.36004 |
| Q9UPQ9 | Trinucleoti  | TNRC6B KIA | -1.89482 | -1.77649 | -1.83094 | -1.67557 | -1.33313 | -1.91511 | -2.75629 | -2.91264 | -1.68713 | -2.03587 |
| Q9UPR0 | Inactive ph  | PLCL2 KIAA | -3.14889 | -3.34169 | -3.11454 | -3.39808 | -3.96652 | -3.26902 | -2.93486 | -2.79412 | -2.60151 | -3.49161 |
| Q9UPT8 | Zinc finger  | ZC3H4 C19  | -0.3239  | -0.25866 | -0.32316 | -0.53509 | -0.35364 | -0.51278 | -0.5346  | -0.63419 | -0.34818 | -0.22611 |
| Q9UPU5 | Ubiquitin c  | USP24 KIA  | -1.59582 | -0.99423 | -1.28477 | -1.69449 | -0.77349 | -0.61815 | -1.07258 | -1.31829 | -1.08389 | -1.24679 |
| Q9UPU7 | TBC1 doma    | TBC1D2B K  | -2.35441 | -2.06898 | -2.76764 | -2.73712 | -1.22372 | -1.50657 | -1.63898 | -1.85715 | -2.19711 | -2.22016 |
| Q9UPW0 | Forkhead b   | FOXJ3 KIAA | -2.64689 | -3.44392 | -2.36146 | -3.9386  | -2.59991 | -4.23704 | -3.96963 | -3.33342 | -1.89984 | -3.13927 |
| Q9UPW5 | Cytosolic c  | AGTPBP1 C  | -1.87673 | -1.32058 | -0.82048 | -0.79098 | -0.87747 | -1.65844 | -0.88782 | -0.82821 | -1.26911 | -1.3429  |
| Q9UQ35 | Serine/argi  | SRRM2 KIA  | -0.72489 | -0.99222 | -0.74759 | -0.79057 | -0.6271  | -0.90072 | -0.61233 | -0.59358 | -0.49584 | -0.5039  |
| Q9UQ80 | Proliferatio | PA2G4 EBP  | 0.723269 | 1.040298 | 0.447287 | 0.306953 | 0.841872 | 0.68862  | 0.699315 | 0.644356 | 0.966606 | 0.843021 |
| Q9UQE7 | Structural r | SMC3 BAM   | -0.20133 | -0.05816 | 0.174035 | 0.176851 | 0.184147 | 0.181968 | 0.145851 | 0.178825 | 0.385995 | 0.241528 |
| Q9UQN3 | Charged m    | CHMP2B C   | -1.26686 | -1.16244 | -0.803   | -1.19703 | -0.77979 | -0.94028 | -0.83646 | -0.38113 | -0.93049 | -1.15941 |
| Q9UQR1 | Zinc finger  | ZNF148 ZBI | -0.34858 | -0.24155 | -0.8799  | -1.73712 | -0.57287 | -0.85491 | -0.97972 | -0.86944 | -0.71936 | -0.35168 |

|        |                          |          |          |          |          |          |          |          |          |          |          |
|--------|--------------------------|----------|----------|----------|----------|----------|----------|----------|----------|----------|----------|
| Q9Y217 | Myotubula MTMR6          | -2.46894 | -2.49281 | -1.40534 | -1.80708 | -1.21129 | -2.40343 | -1.87447 | -2.21795 | -2.46773 | -2.24828 |
| Q9Y223 | Bifunctional GNE GLCNF   | 0.822859 | 0.890683 | 0.603045 | 0.349267 | 0.766409 | 0.551796 | 0.882816 | 0.959358 | 0.393664 | 0.833666 |
| Q9Y224 | RNA transc RTRAF C14     | 0.726862 | 0.914525 | 1.158491 | 1.064966 | 1.086421 | 0.996137 | 0.825057 | 1.077134 | 1.280898 | 1.130481 |
| Q9Y228 | TRAF3-inte TRAF3IP3 T    | -0.2501  | -0.05976 | 0.264887 | -0.03929 | -0.01765 | -0.00906 | 0.159657 | -0.04649 | -0.15106 | 0.02764  |
| Q9Y230 | RuvB-like 2 RUVBL2 INI   | 0.387904 | 0.375509 | 0.425227 | 0.228271 | 0.497096 | 0.406138 | 0.43721  | 0.393383 | 0.595779 | 0.609077 |
| Q9Y237 | Peptidyl-pr PIN4         | 0.488887 | 0.566651 | 0.375509 | 0.085247 | 0.766409 | 1.058894 | 0.733893 | 0.733527 | 0.222392 | 0.098355 |
| Q9Y262 | Eukaryotic EIF3L EIF3E   | 0.937244 | 1.119199 | 0.47087  | 0.452883 | 0.303112 | 0.364815 | 0.446558 | 0.384032 | 0.397705 | 0.572337 |
| Q9Y263 | Phospholip PLAA PLAP     | -0.12003 | 0.169058 | -0.06507 | 0.126454 | 0.025569 | -0.43706 | -0.23378 | -0.69951 | -0.2636  | -0.07043 |
| Q9Y265 | RuvB-like 1 RUVBL1 INI   | -0.06589 | -0.07604 | -0.08452 | -0.19444 | 0.087471 | -0.00151 | -0.04819 | 0.016352 | 0.055495 | 0.260847 |
| Q9Y266 | Nuclear mi; NUDC         | 0.657318 | 0.892785 | 0.326644 | 0.563026 | 0.559958 | 0.934622 | 0.721536 | 0.669605 | 0.825601 | 0.967933 |
| Q9Y277 | Voltage-de VDAC3         | 1.738177 | 1.647283 | 0.349022 | 0.875609 | -0.68988 | 0.593581 | 1.303392 | 0.839704 | -0.38278 | -0.9441  |
| Q9Y282 | Endoplasm ERGIC3 C2C     | -0.43539 | -0.57138 | -0.37656 | -0.44461 | -0.76702 | -0.70454 | -0.43911 | -0.43812 | -1.3505  | -1.21945 |
| Q9Y285 | Phenylalan FARSA FAR     | 0.192645 | 0.307544 | 0.123255 | -0.24382 | -0.06853 | 0.010888 | 0.06502  | 0.197646 | 0.436099 | 0.316608 |
| Q9Y295 | Developme DRG1 NEDI      | -0.83954 | -0.82402 | -0.58887 | -0.55781 | -0.71727 | -0.51301 | -0.74723 | -0.6735  | -0.50441 | -0.47968 |
| Q9Y2B0 | Protein car CNPY2 MS/    | -0.55667 | -0.48848 | -0.31773 | -0.37428 | -0.14436 | -0.41518 | -0.57459 | -0.43028 | -0.24896 | -0.38883 |
| Q9Y2D0 | Carbonic an CA5B         | 1.096657 | 1.143933 | 1.200885 | 1.210088 | 1.381114 | 1.481667 | 1.200247 | 1.402183 | 1.026572 | 1.043493 |
| Q9Y2D9 | Zinc finger ZNF652 KIA   | 0.254929 | 0.521187 | 0.603045 | 0.329436 | 0.735478 | 0.330645 | 0.323973 | 0.017074 | 0.500835 | 0.458627 |
| Q9Y2G2 | Caspase re; CARD8 KIA    | -0.3677  | 0.079404 | 0.267758 | 0.359356 | 0.293046 | 0.363167 | -0.03998 | -0.00796 | 0.087095 | -0.00834 |
| Q9Y2H0 | Disks large; DLGAP4 DA   | 0.658622 | 0.556262 | -0.73048 | -0.28325 | -0.4086  | 0.323503 | -0.02154 | -0.1901  | -0.25471 | -0.15945 |
| Q9Y2H6 | Fibronectin FNDC3A FN    | -2.76553 | -1.44392 | -2.70272 | -3.49875 | -3.66473 | -2.17156 | -1.55459 | -2.848   | -2.06756 | -2.37145 |
| Q9Y2I1 | Nischarin (I) NISCH IRAS | -1.28011 | -1.38163 | -1.05565 | -0.5881  | -1.42999 | -1.31647 | -1.07346 | -1.19592 | -0.74959 | -0.54137 |
| Q9Y2I8 | WD repeat WDR37 KIA      | 0.399803 | 0.414062 | 0.776958 | 0.658336 | 0.809478 | 0.564159 | 0.776328 | 0.561879 | 0.390071 | 0.409495 |
| Q9Y2K7 | Lysine-spec KDM2A CX     | -1.43987 | -0.96113 | -1.655   | -1.46721 | -1.48563 | -1.38015 | -1.1055  | -0.92302 | -1.06756 | -1.1589  |
| Q9Y2L1 | Exosome co; DIS3 KIAA1   | -0.06193 | 0.210086 | 0.112362 | 0.220318 | -0.00463 | -0.04868 | 0.253432 | 0.35736  | -0.20754 | -0.12956 |
| Q9Y2L5 | Trafficking TRAPPC8 K    | -0.27277 | -0.06786 | 0.039083 | 0.30827  | -0.37109 | -1.0902  | -0.03653 | -0.09822 | -0.82276 | -0.30981 |
| Q9Y2L9 | Leucine-ric LRCH1 CHC    | -0.77588 | 0.083328 | -1.1305  | -1.21613 | -0.76702 | -0.94636 | -0.90115 | -1.33342 | -0.62076 | -0.54783 |
| Q9Y2P8 | RNA 3'-terr RCL1 RNAC    | -1.48543 | -1.16506 | -1.7632  | -1.23078 | -1.74193 | -0.77761 | -0.88216 | -1.48543 | -1.08746 | -1.60726 |
| Q9Y2Q3 | Glutathione; GSTK1 HDC   | 0.969681 | 0.822702 | 0.944352 | 0.672017 | 0.454548 | 0.888025 | 0.601348 | 0.71217  | 0.460325 | 0.37562  |
| Q9Y2Q5 | Ragulator c LAMTOR2 I    | -0.98563 | -0.61511 | -1.18726 | -0.66885 | -1.17209 | -0.74319 | -0.9106  | -1.36603 | -1.27202 | -1.03908 |
| Q9Y2Q9 | 28S ribosom MRPS28 M     | -0.37126 | -0.24598 | -0.48153 | -0.44461 | -0.54463 | -0.11958 | -0.41163 | -0.29078 | -0.46949 | -0.1788  |
| Q9Y2R2 | Tyrosine-pr; PTPN22 PT   | 1.458329 | 1.484034 | 1.701039 | 1.496585 | 1.607101 | 1.568474 | 1.622    | 1.624491 | 1.338802 | 1.396106 |
| Q9Y2R5 | 28S ribosom MRPS17 RF    | 0.297304 | 0.213021 | 0.267979 | 0.14315  | 0.287789 | 0.177345 | 0.272132 | 0.27454  | 0.362542 | 0.003919 |
| Q9Y2S6 | Translation TMA7 CCDI    | 0.131698 | 0.35344  | 1.099068 | 0.788717 | 1.74086  | 0.899496 | 0.96276  | 0.85545  | 1.954431 | 2.351685 |

|        |                         |          |          |          |          |          |          |          |          |          |          |
|--------|-------------------------|----------|----------|----------|----------|----------|----------|----------|----------|----------|----------|
| Q9Y2T2 | AP-3 comp AP3M1         | 1.438338 | 1.609448 | 0.779231 | 0.837505 | 0.879867 | 1.128033 | 1.120192 | 0.911463 | 0.792461 | 0.880091 |
| Q9Y2U5 | Mitogen-ac MAP3K2 M     | -1.70499 | -1.58887 | -1.81714 | -1.73697 | -0.97056 | -2.02203 | -1.45305 | -2       | -1.83112 | -1.74882 |
| Q9Y2U8 | Inner nucle LEMD3 MA    | -1.33147 | -1.62069 | -1.2752  | -1.20192 | -2.15478 | -1.72586 | -1.43063 | -1.44021 | -1.67368 | -1.29885 |
| Q9Y2V2 | Calcium-rej CARHSP1     | -3.30986 | -2.4021  | -1.42286 | -1.96285 | -2.07635 | -2.0902  | -1.52484 | -1.55102 | -1.9906  | -1.30433 |
| Q9Y2W1 | Thyroid ho THRAP3 BC    | 0.478033 | 0.482639 | 0.784829 | 0.547038 | 0.588856 | 0.500538 | 0.43429  | 0.493058 | 1.078949 | 1.064956 |
| Q9Y2W2 | WW domai WBP11 NP       | -0.01435 | -0.02971 | 0.745388 | 0.834848 | 0.842017 | 0.938859 | 0.634016 | 0.945416 | 1.015828 | 1.054537 |
| Q9Y2W6 | Tudor and TDRKH TDF     | -1.40065 | -0.60807 | -0.79329 | -0.80821 | -0.72137 | -0.51405 | -0.83191 | -0.54366 | -0.90576 | -0.94636 |
| Q9Y2X3 | Nucleolar p NOP58 NO    | -0.09019 | 0.263034 | 0.832753 | 0.4899   | 0.899933 | 0.551796 | 0.478834 | 0.312739 | 0.89743  | 0.711968 |
| Q9Y2X7 | ARF GTPase GIT1         | -1.06193 | -1.02359 | -0.91697 | -0.76808 | -0.81855 | -0.4975  | -1.25696 | -1.35838 | -0.66182 | -0.84093 |
| Q9Y2Y0 | ADP-ribosy ARL2BP BA    | 0.741807 | 0.756331 | -1.31635 | -1.56868 | -1.16377 | -1.5985  | -2.16573 | -1.85838 | 0.756633 | 0.656896 |
| Q9Y2Y9 | Krueppel-li KLF13 BTEE  | -2.57289 | -1.96153 | -2.17383 | -3.20163 | -3.35199 | -2       | -3.3322  | -3.80735 | -3.5025  | -2.2402  |
| Q9Y2Z0 | Protein SG SUGT1        | -0.79679 | -0.70483 | -0.31706 | -0.0707  | -0.4855  | -0.60126 | -0.64703 | -0.77305 | -0.43549 | -0.19898 |
| Q9Y2Z9 | Ubiquinone COQ6 CGI-    | 0.552645 | 0.52061  | -0.66551 | 0.056828 | 0.370305 | -0.04985 | 0.158212 | 0.311486 | -0.77857 | 0.103612 |
| Q9Y303 | N-acetylglu AMDHD2 C    | -3.19438 | -2.30256 | -2.05565 | -2.9386  | -3.79256 | -3.34395 | NA       | NA       | -3.16993 | -4.1008  |
| Q9Y305 | Acyl-coenz ACOT9 CGI-   | -0.09508 | 0.115053 | 0.039567 | -0.13607 | 0.258738 | 0.100417 | -0.00499 | -0.04946 | -0.434   | -0.52615 |
| Q9Y314 | Nitric oxide NOSIP CGI- | 0.268257 | 0.213448 | 0.151613 | -0.0443  | 0.208074 | 0.263945 | 0.081208 | 0.032494 | 0.470533 | 0.573113 |
| Q9Y315 | Deoxyribos DERA CGI-2   | 0.418065 | 0.675633 | 0.158617 | 0.765535 | 0.48755  | 0.053638 | 0.286713 | 0.380272 | 0.375607 | 0.47782  |
| Q9Y320 | Thioredoxin TMX2 TXNI   | -1.48873 | -1.31966 | -0.74261 | -1.65041 | -0.47543 | -0.73406 | -0.86659 | -0.72066 | -0.67572 | -0.99607 |
| Q9Y324 | rRNA-proce FCF1 C14or   | -0.72489 | -0.7112  | -1.11353 | -2.03814 | -1.37109 | -0.79647 | -0.70492 | -1.23581 | -1.2916  | -1.73402 |
| Q9Y333 | U6 snRNA-i LSM2 C6or    | 0.165878 | 0.363436 | 1.239713 | 1.140226 | 1.154975 | 1.367812 | 0.727727 | 1.270648 | 1.381156 | 1.230588 |
| Q9Y371 | Endophilin SH3GLB1 K    | -0.62609 | -0.72236 | -0.27811 | -0.11169 | -0.47456 | -0.39155 | 0.248466 | 0.518575 | -0.4068  | -0.26278 |
| Q9Y376 | Calcium-bir CAB39 MO    | 0.763191 | 0.786232 | 0.522493 | 0.865316 | 0.492844 | 1.138553 | 0.897877 | 0.971087 | 0.413046 | 0.196845 |
| Q9Y383 | Putative RL LUC7L2 CG   | 0.021353 | 0.584904 | 0.310489 | 0.447027 | 0.366544 | 0.048738 | 0.180168 | -0.18842 | 0.429016 | 0.570002 |
| Q9Y394 | Dehydroge DHRS7 DHF     | -0.73595 | -0.58158 | -0.30757 | -0.7447  | -1.50525 | -0.71654 | -0.60486 | -0.58284 | -0.27931 | -0.59905 |
| Q9Y399 | 28S ribosor MRPS2 CGI   | -0.96094 | -1.05676 | -0.30083 | 0.005366 | -0.58544 | -0.38806 | -0.36864 | -0.34051 | -0.38874 | -1.06779 |
| Q9Y3A2 | Probable U UTP11 UTP    | -0.18979 | -0.58887 | -0.74522 | -0.9164  | -0.19903 | -0.30219 | -0.75386 | -0.83951 | -0.64565 | -0.62936 |
| Q9Y3A3 | MOB-like p MOB4 MOI     | 2.209245 | 2.348934 | 1.940453 | 2.065008 | 1.656091 | 1.827602 | 1.966141 | 1.973367 | 1.934975 | 1.810138 |
| Q9Y3A4 | Ribosomal RRP7A CGI-    | -0.13451 | 0.099317 | -0.47591 | -0.31224 | 0.006943 | -0.20232 | -0.43602 | -0.21159 | -0.35477 | -0.18186 |
| Q9Y3A5 | Ribosome r SBDS CGI-9   | 0.548126 | 0.968464 | 0.697437 | 0.689785 | 0.757639 | 0.90105  | 0.648351 | 0.655715 | 0.91504  | 1.364319 |
| Q9Y3B2 | Exosome c EXOSC1 CSI    | -0.51978 | -0.52576 | -0.64874 | -0.70594 | -0.33313 | -0.56058 | -0.82667 | -0.78746 | -0.4892  | -0.30433 |
| Q9Y3B3 | Transmeml TMED7 CGI     | 0.317233 | -0.07242 | 0.181857 | 0.916088 | 0.805649 | 0.408082 | 0.050062 | 1.48052  | 0.502319 | 0.84331  |
| Q9Y3B7 | 39S ribosor MRPL11 CC   | -0.07008 | -0.17978 | 0.351249 | 0.354549 | 0.283287 | 0.492415 | 0.310062 | 0.458625 | 0.585644 | 0.59829  |
| Q9Y3B8 | Oligoribont REXO2 SFN   | -2.0332  | -1.1325  | -1.25241 | -1.68453 | -1.67874 | -1.19863 | -1.8367  | -0.86325 | -1.04118 | -1.2017  |

|        |                         |          |          |          |          |          |          |          |          |          |          |
|--------|-------------------------|----------|----------|----------|----------|----------|----------|----------|----------|----------|----------|
| Q9Y3C0 | WASH com WASHC3 A       | -1.1669  | -1.34156 | -1.08017 | -2.98751 | -2.84503 | -2.48981 | -2.07346 | -1.71049 | -1.55695 | -1.0726  |
| Q9Y3C1 | Nucleolar p NOP16 CGI   | 1.267574 | 1.414062 | 0.638544 | 0.294061 | 1.110894 | 0.673282 | 0.303392 | 0.611435 | 1.080234 | 0.936674 |
| Q9Y3C6 | Peptidyl-pr PPIL1 CYPL  | 1.2151   | 1.13861  | 1.362001 | 0.938704 | 1.369215 | 1.43202  | 1.338641 | 1.401991 | 1.459449 | 1.341885 |
| Q9Y3C8 | Ubiquitin-f UFC1 CGI-1  | 0.367277 | 0.357362 | 0.45446  | 0.055377 | -0.02248 | 0.110424 | 0.336182 | 0.067114 | 0.242458 | 0.442435 |
| Q9Y3D0 | Cytosolic ir CIAO2B CIA | -0.51769 | -0.53156 | -0.16722 | -0.45317 | -0.34206 | -0.31798 | -0.52458 | -0.25089 | -0.39055 | -0.40313 |
| Q9Y3D3 | 28S ribosor MRPS16 RF   | -3.37126 | -3.44392 | -1.7901  | -2.91031 | -2.68505 | -2.52425 | -1.92029 | -1.37012 | -1.6018  | -2.34102 |
| Q9Y3E5 | Peptidyl-tR PTRH2 BIT1  | -1.51487 | -1.55138 | -1.61316 | -1.31472 | -1.80743 | -1.27645 | -2.3192  | -1.46827 | -1.72856 | -1.73402 |
| Q9Y3E7 | Charged m CHMP3 CG      | 0.213707 | 0.443033 | 0.550768 | 0.085247 | 0.300954 | 0.548063 | -0.1452  | 0.197646 | 0.581816 | 0.637114 |
| Q9Y3F4 | Serine-thre STRAP MA    | -0.73668 | -0.5148  | -0.74522 | -0.70797 | -0.04532 | 0.120513 | -0.22069 | 0.222392 | -0.57875 | -0.5201  |
| Q9Y3I0 | RNA-splicin RTCB C22o   | 0.484144 | 0.471596 | 0.622103 | 0.52877  | 0.534513 | 0.268489 | 0.522227 | 0.490049 | 0.739792 | 0.711968 |
| Q9Y3L3 | SH3 domai SH3BP1        | 0.077561 | 0.181325 | 0.231355 | 0.258061 | 0.146019 | 0.128988 | 0.324682 | 0.261488 | 0.112714 | 0.208343 |
| Q9Y3P8 | Signaling tr SIT1 SIT   | 0.523035 | 0.798709 | 0.968852 | 0.895977 | 0.503375 | 0.710493 | 0.989732 | 0.861924 | 0.655501 | 0.634265 |
| Q9Y3P9 | Rab GTPase RABGAP1 F    | -0.28572 | -0.44933 | -0.1509  | -0.12507 | -0.38424 | -0.27796 | -0.2601  | -0.39687 | -0.47309 | -0.44121 |
| Q9Y3Q8 | TSC22 dom TSC22D4 TI    | -0.63743 | -0.50901 | -0.5909  | -0.20402 | -0.54511 | -0.42236 | -0.55459 | -0.69188 | -0.3484  | -0.53612 |
| Q9Y3S2 | Zinc finger ZNF330 NC   | -2.09393 | -1.36648 | -1.34914 | -1.87277 | -2.39628 | -2.1682  | -1.74224 | -1.73827 | -1.94762 | -1.53816 |
| Q9Y3T9 | Nucleolar c NOC2L NIR   | -1.90994 | -1.38393 | -3.24598 | -1.59756 | -2.89947 | -2.1375  | -3.28157 | -1.72935 | -3.32684 | -2.69912 |
| Q9Y3U8 | 60S ribosor RPL36       | 0.652077 | 0.740082 | 0.59934  | 0.13954  | 0.539639 | 0.356485 | 0.344264 | 0.011405 | 0.168877 | 0.28061  |
| Q9Y3X0 | Coiled-coil CCDC9       | -0.32849 | -0.1393  | -0.35702 | -0.13108 | -0.03404 | -0.3491  | -0.16326 | -0.26282 | -0.25583 | -0.03941 |
| Q9Y3Y2 | Chromatin CHTOP C1c     | -0.54563 | -0.49687 | -0.78319 | -1.48794 | -0.88567 | -0.68684 | -0.65941 | -0.48721 | -0.42432 | -0.46325 |
| Q9Y3Z3 | Deoxynucl SAMHD1 N      | 0.775811 | 0.932143 | 0.269518 | 0.392115 | 0.34675  | 0.689504 | 0.699276 | 0.506615 | 0.234465 | 0.191275 |
| Q9Y421 | Protein FAI FAM32A O    | 1.173012 | 1.427121 | 1.429432 | 1.128722 | 1.417691 | 1.136728 | 1.277681 | 0.991611 | 1.467031 | 1.651739 |
| Q9Y450 | HBS1-like p HBS1L HBS   | -1.92045 | -2.15624 | -1.62289 | -2.24076 | -1.53753 | -1.98088 | -1.79586 | -1.65931 | -1.91075 | -1.47884 |
| Q9Y478 | 5'-AMP-act PRKAB1 AM    | -1.25096 | -1.02359 | -1.24598 | -1.0906  | -0.51245 | -0.67807 | -0.76451 | -0.80735 | -1       | -0.79414 |
| Q9Y490 | Talin-1 TLN1 KIAA1      | 0.313013 | 0.335249 | 0.17761  | 0.186394 | 0.086588 | 0.13378  | 0.24846  | 0.241839 | 0.063018 | 0.121547 |
| Q9Y4A5 | Transform TRRAP PAF     | -0.25819 | -0.01963 | -0.44392 | -0.11078 | -0.17521 | -0.02329 | -0.01543 | -0.0115  | -0.00055 | -0.26942 |
| Q9Y4B6 | DDB1- and DCAF1 KIA     | -0.0485  | 0.119938 | 0.960831 | 0.466208 | 0.543943 | 0.211675 | 0.454134 | 0.346857 | 0.527614 | 0.993567 |
| Q9Y4C1 | Lysine-spec KDM3A JHI   | -2.38156 | -2.08596 | -2.35096 | -2.06964 | -2.29717 | -2.02631 | -0.93988 | -1.13179 | -1.849   | -2.00789 |
| Q9Y4C8 | Probable R RBM19 KIA    | -3.57289 | -3.62449 | -4.07195 | -3.03814 | NA       | NA       | -2.9301  | -2.88982 | -2.32665 | -2.04495 |
| Q9Y4E1 | WASH com WASHC2C I      | -1.17985 | -1.28311 | -1.25295 | -0.04096 | -1.04435 | -0.39154 | -1.07604 | -1.10502 | -0.91195 | -0.66735 |
| Q9Y4E8 | Ubiquitin c USP15 KIA   | 0.012073 | 0.123255 | -0.18709 | 0.055377 | 0.036712 | -0.01097 | 0.025356 | -0.16993 | 0.13493  | 0.03065  |
| Q9Y4F9 | Rho family- RIPOR2 C6   | -0.68407 | -0.46301 | -0.43928 | -0.41821 | -0.51674 | -0.6864  | -0.39599 | -0.36455 | -0.61105 | -0.8444  |
| Q9Y4H4 | G-protein-s GPSM3 AG    | -2.32889 | -2.01124 | -1.68956 | -2.26053 | -2.8931  | -1.98201 | -2.34777 | -2.4439  | -1.79202 | -1.70415 |
| Q9Y4I1 | Unconvent MYO5A MY      | -0.54609 | -0.32193 | -0.30738 | -0.82312 | -0.22487 | -0.60145 | -0.43911 | -0.78746 | -0.79796 | -0.27727 |

|        |                          |          |          |          |          |          |          |          |          |          |          |
|--------|--------------------------|----------|----------|----------|----------|----------|----------|----------|----------|----------|----------|
| Q9Y4K1 | Beta/gamn CRYBG1 All     | 0.36607  | 0.289054 | 0.886886 | 0.791678 | 0.406522 | 0.526574 | 0.512054 | 0.373483 | 0.421243 | 0.308522 |
| Q9Y4L1 | Hypoxia up HYOU1 GRI     | 0.26     | 0.275722 | 0.425721 | 0.516454 | -0.04639 | 0.084889 | 0.307532 | 0.017074 | 0.189192 | -0.05554 |
| Q9Y4P8 | WD repeat WIPI2 CGI-     | -0.92903 | -1.15634 | -1.02359 | -0.85681 | -0.74193 | -0.55254 | -0.9301  | -0.69188 | -0.90866 | -0.6763  |
| Q9Y4W2 | Ribosomal LAS1L MST      | -0.39497 | 0.034673 | -0.28102 | -0.52497 | -0.18206 | -0.33703 | -0.45443 | -0.48723 | -0.22396 | -0.01334 |
| Q9Y4W6 | AFG3-like p AFG3L2       | 0.730984 | 0.911455 | 0.78137  | 0.689256 | 0.519579 | 0.935745 | 0.92075  | 0.529185 | 0.992193 | 0.605468 |
| Q9Y4X5 | E3 ubiquitin ARIH1 ARI I | 0.642619 | 0.599175 | 0.958688 | 0.83042  | 0.755235 | 0.831365 | 0.888577 | 0.688756 | 1.107726 | 1.124833 |
| Q9Y4Z0 | U6 snRNA-i LSM4          | -0.0739  | 0.114411 | 0.3725   | 0.171318 | -0.23359 | 0.624491 | -0.28157 | 0.335603 | 0.612977 | 0.596716 |
| Q9Y508 | E3 ubiquitin RNF114 ZN   | -1.19438 | -0.93892 | -0.99222 | -0.91475 | -0.66918 | -0.635   | -0.7997  | -0.96605 | -0.85651 | -0.46609 |
| Q9Y512 | Sorting anc SAMM50 S     | -0.12172 | 0.152194 | -0.5961  | -1.70915 | -1.33309 | -0.81575 | -0.22871 | -0.92599 | -0.1066  | 0.193411 |
| Q9Y520 | Protein PRI PRRC2C BA    | -0.83954 | -0.59474 | -0.28483 | -0.51584 | -0.30182 | -0.27631 | -0.53964 | -0.56789 | -0.19174 | -0.3393  |
| Q9Y530 | ADP-ribose OARD1 C6c     | -0.51978 | -0.92405 | 1.030861 | 0.984233 | 1.036712 | 1.453458 | 0.730813 | 1.072569 | 1.344383 | 1.276981 |
| Q9Y570 | Protein phc PPME1 PM     | -0.64702 | -0.66021 | -0.34515 | -0.58402 | -0.33358 | -0.63991 | -0.30907 | -0.28288 | -0.16598 | -0.29184 |
| Q9Y580 | RNA-bindin RBM7          | -0.69515 | -0.59474 | -0.55984 | 0.114512 | -0.39046 | -0.31647 | -0.70492 | -0.80735 | -0.45649 | -0.66925 |
| Q9Y5A7 | NEDD8 ulti NUB1 NYRf     | -0.40296 | -0.53703 | -2.43155 | -2.44423 | -0.57755 | -0.67807 | -2.19366 | -2.27791 | -2.01372 | -2.36981 |
| Q9Y5A9 | YTH domai YTHDF2 HC      | 0.431612 | 0.638544 | 0.743165 | 1.066548 | 1.145826 | 1.360383 | 1.31166  | 1.072569 | -0.03822 | -0.07727 |
| Q9Y5B0 | RNA polym CTDP1 FCP      | -0.26812 | -0.16572 | -0.16186 | -0.4583  | 0.036694 | -0.39329 | -0.12545 | -0.14316 | -0.35963 | 0.099414 |
| Q9Y5B6 | PAX3- and PAXBP1 C2      | -1.28011 | -1.27399 | -1.26459 | -1.7794  | -4.01495 | -1.60145 | -1.9898  | -1.43812 | -1.37474 | -1.2402  |
| Q9Y5B9 | FACT comp SUPT16H F      | 0.181998 | -0.11775 | -0.31221 | -0.0707  | 0.405712 | 0.386058 | -0.30666 | -0.05842 | 0.147754 | 0.039289 |
| Q9Y5J1 | U3 small nt UTP18 WD     | -0.666   | -0.96153 | -1.20046 | -1.84549 | -1.10806 | -0.90484 | -1.45305 | -0.85834 | -0.74169 | -0.60726 |
| Q9Y5J6 | Mitochond TIMM10B f      | -1.32526 | -1.01264 | -1.47175 | -1.70867 | -1.04874 | -1.02272 | -1.2739  | -1.00836 | -0.72407 | -0.68307 |
| Q9Y5J7 | Mitochond TIMM9 TIM      | 1.422082 | 1.524427 | 1.591776 | 1.598996 | 1.598604 | 1.583105 | 1.507798 | 1.547118 | 1.850669 | 1.739099 |
| Q9Y5K5 | Ubiquitin c UCHL5 UCF    | 0.24669  | 0.836846 | 0.408832 | 0.646029 | 0.771696 | 0.691527 | 0.94834  | 0.697806 | 0.336781 | 0.295705 |
| Q9Y5K6 | CD2-associ CD2AP         | 0.371969 | 0.513013 | 1.133954 | 1.024875 | 0.899933 | 0.566631 | 0.767339 | 0.655715 | 1.164677 | 1.260451 |
| Q9Y5L0 | Transportir TNPO3 IPO    | -0.48093 | -0.32161 | -0.15275 | -0.01834 | -0.05642 | -0.14452 | 0.030989 | -0.0397  | 0.505365 | 0.46579  |
| Q9Y5L4 | Mitochond TIMM13 TI      | -0.70195 | -0.67878 | -0.72495 | -0.95374 | -1.46769 | -0.65261 | -0.53943 | -0.57129 | -0.49246 | -0.55663 |
| Q9Y5M8 | Signal reco SRPRB PSEf   | 0.953805 | 0.915702 | 1.662144 | 1.371256 | 1.772952 | 1.743508 | 1.198071 | 0.880701 | 1.262248 | 1.155098 |
| Q9Y5P4 | Ceramide t CERT1 CER     | -1.1242  | -1.28018 | -0.152   | -0.39428 | -1.61561 | -0.77098 | -1.29147 | -1.12777 | -0.23502 | -0.68339 |
| Q9Y5P6 | Mannose-1 GMPPB          | 0.880898 | 0.989736 | 0.917982 | 0.851017 | 1.192512 | 0.953068 | 0.880434 | 0.641238 | 0.607638 | 0.718766 |
| Q9Y5S1 | Transient r TRPV2 VRL    | -1.48543 | -1.57719 | -1.45457 | -1.35364 | -3.69302 | -1.79647 | -2.38466 | -1.30485 | -1.89984 | -1.80957 |
| Q9Y5S9 | RNA-bindin RBM8A RBI     | -0.6548  | -0.64093 | -0.74645 | -0.65621 | -0.70135 | -0.39334 | -0.63289 | -0.78739 | -0.53629 | -0.64829 |
| Q9Y5T5 | Ubiquitin c USP16 MST    | -1.64889 | -1.32768 | -0.81616 | -1.29033 | -1.40523 | -1.77627 | -2.18611 | -1.22276 | -0.57851 | -1.02483 |
| Q9Y5V0 | Zinc finger ZNF706 HS    | -1.75377 | -1.34577 | -1.19484 | -1.40776 | -1.50796 | -1.4243  | -1.36921 | -1.27149 | -0.86735 | -1.28752 |
| Q9Y5X1 | Sorting nex SNX9 SH3P    | -3.13993 | -2.24598 | -2.32612 | -1.89178 | -1.31451 | -2.02203 | -1.66382 | -2       | -1.93546 | -1.74882 |



|        |                         |          |          |          |          |          |          |          |          |          |          |
|--------|-------------------------|----------|----------|----------|----------|----------|----------|----------|----------|----------|----------|
| Q9Y5X3 | Sorting nex SNX5        | 0.006049 | -0.14336 | -0.42809 | -0.79021 | -0.41009 | -0.05004 | -0.30035 | -1.0115  | -0.4119  | -0.87299 |
| Q9Y5Y2 | Cytosolic F1 NUBP2      | -0.28751 | -0.28221 | -0.28741 | -0.00486 | -0.07274 | 0.260354 | 0.015267 | 0.137101 | -0.10637 | 0.059789 |
| Q9Y5Z4 | Heme-bind HEBP2 C6o     | -0.01563 | -0.21841 | 0.368712 | 0.390762 | 0.257623 | 0.112154 | 0.20346  | 0.235113 | 0.529657 | 0.520832 |
| Q9Y5Z9 | UbiA preny UBIAD1 TEI   | -1.35566 | -1.12199 | -1.61252 | -1.4361  | -1.14048 | -1.27621 | -1.45305 | -1.6735  | -1.76553 | -1.74882 |
| Q9Y606 | tRNA pseuc PUS1 PP89    | -1.02445 | -1.01568 | -0.89476 | -0.52494 | -1.01495 | -0.97159 | -0.73016 | -0.77761 | -1.02857 | -0.7019  |
| Q9Y608 | Leucine-ric LRRFIP2     | 0.14257  | 0.204465 | 0.197482 | 0.155334 | 0.140122 | -0.06893 | 0.29853  | 0.052641 | 0.306466 | 0.427823 |
| Q9Y617 | Phosphose PSAT1 PSA     | -1.01217 | -1.34156 | -1.06378 | -0.98751 | -1.14048 | -1       | -1.38466 | -1.23581 | -0.89984 | -0.84093 |
| Q9Y624 | Junctional ; F11R JAM1  | -0.72489 | 0.061076 | -0.65486 | -0.51457 | -0.19903 | -0.03877 | -0.378   | -0.50155 | -0.39941 | -1.18886 |
| Q9Y657 | Spindlin-1 ( SPIN1 OCR  | -1.35766 | -1.43581 | -1.07676 | -1.4344  | -1.72561 | -1.43044 | -1.15216 | -1.13359 | -1.29456 | -1.11378 |
| Q9Y673 | Dolichyl-ph ALG5 HSPC   | -0.64689 | -0.7632  | -0.87317 | -0.62632 | -1.07635 | -0.84472 | -0.93988 | -1.16993 | -1.31487 | -1.32636 |
| Q9Y676 | 28S ribosor MRPS18B C   | -0.73495 | -0.60064 | -2.33953 | -2.50093 | -2.14197 | -2.09547 | -0.7997  | -1.34792 | -2.33269 | -2.91974 |
| Q9Y678 | Coatomer ; COPG1 COI    | 0.716089 | 0.770341 | 0.457175 | 0.318777 | 0.51815  | 0.328929 | 0.400967 | 0.391661 | 0.139744 | 0.460747 |
| Q9Y692 | Glucocortic GMEB1       | -0.76553 | -0.59474 | -0.28821 | -0.62632 | -0.6574  | -0.31647 | -0.46007 | -0.69188 | -0.71823 | -0.44184 |
| Q9Y696 | Chloride in CLIC4       | -0.62594 | -0.62494 | -0.8517  | -0.9628  | -0.37225 | -0.34919 | -1.07542 | -0.8407  | -1.06584 | -0.67404 |
| Q9Y697 | Cysteine de NFS1 NIFS I | 0.990879 | 0.714171 | 1.097975 | 0.865316 | 0.887927 | 1.257102 | 0.953206 | 0.874469 | 1.325695 | 1.221127 |
| Q9Y6A4 | Cilia- and fl CFAP20 BU | -0.83868 | -0.10246 | -0.95141 | -0.84567 | -1.46857 | -1.27095 | -1.09636 | -1.55258 | -0.75537 | -0.6036  |
| Q9Y6A5 | Transformi TACC3 ERIC   | -0.7912  | -0.79667 | -1.14768 | -1.26053 | -0.9417  | -0.71895 | -1.34496 | -1.32318 | -0.76553 | -0.34295 |
| Q9Y6B6 | GTP-bindin SAR1B SAR    | 0.543974 | 0.909488 | -0.7176  | -0.17306 | -0.55552 | -0.42968 | -0.26919 | -0.79737 | -1.28011 | -0.61402 |
| Q9Y6D6 | Brefeldin A ARFGEF1 A   | -0.53224 | -0.47565 | -1.29396 | -1.27563 | -1.26006 | -1.02203 | -1.1536  | -1.20588 | -1.7028  | -1.65069 |
| Q9Y6D9 | Mitotic spii MAD1L1 M   | -0.06568 | 0.34233  | -0.11416 | -0.25139 | 0.381567 | 0.265955 | 0.268117 | 0.161102 | 0.203945 | 0.369811 |
| Q9Y6E0 | Serine/thre STK24 MST   | -1.49874 | -1.12209 | -1.55406 | -1.8079  | -1.16473 | -0.82552 | -1.00233 | -1.0951  | -1.52767 | -1.25217 |
| Q9Y6G9 | Cytoplasmic DYNC1L1 L   | -1.56728 | -1.84519 | -1.26899 | -1.31464 | -2.62281 | -1.52117 | -1.58627 | -2.12988 | -1.52953 | -1.62816 |
| Q9Y6I3 | Epsin-1 (EH EPN1        | -2.09393 | -2.6269  | -2.78671 | -2.07615 | -1.59991 | -1.22422 | -1.19704 | -1.55102 | -2.83621 | -2.31032 |
| Q9Y6I4 | Ubiquitin c USP3        | -1.89552 | -1.92453 | -1.43224 | -1.73606 | -0.269   | 0.016302 | -0.02061 | -0.04064 | -0.24058 | -0.1788  |
| Q9Y6J0 | Calcineurin CABIN1 KIA  | -0.25096 | 0.123255 | 0.564016 | 0.538214 | 0.766409 | 0.245625 | 0.411195 | 0.662965 | 0.559596 | 0.918058 |
| Q9Y6K1 | DNA (cytos DNMT3A       | -2.78784 | -2.39341 | -2.5006  | -2.76164 | -2.37347 | -2.76612 | -2.67896 | -2.68153 | -2.55523 | -2.84646 |
| Q9Y6K5 | 2'-5'-oligoa OAS3 P/OK  | 0.160465 | 0.12683  | 0.069661 | 0.102877 | -0.04532 | -0.03877 | 0.235488 | 0.298844 | -0.43084 | -0.42392 |
| Q9Y6K9 | NF-kappa-E IKBKG FIP3   | 0.032756 | -0.21659 | 0.344717 | 0.093152 | 0.181596 | 0.419859 | -0.29093 | 0.10587  | 0.046393 | 0.150534 |
| Q9Y6M9 | NADH dehy NDUFB9 LY     | 0.514573 | 0.193132 | -0.69218 | -0.04459 | -0.88567 | 0.740241 | 0.348289 | -0.02891 | -0.97199 | -1.0726  |
| Q9Y6N5 | Sulfide:quii SQOR SQRI  | 1.319501 | 1.184581 | 1.168825 | 1.473074 | 0.762244 | 0.781018 | 1.057665 | 0.959358 | 0.583499 | 0.462562 |
| Q9Y6R4 | Mitogen-ac MAP3K4 KI    | -1.85042 | -1.73697 | -1.93147 | -1.86821 | -1.06075 | -1.33015 | -1.26919 | -1.60224 | -1.38702 | -1.16882 |
| Q9Y6V7 | Probable A DDX49        | 1.107997 | 1.057333 | 0.690206 | 0.407175 | 0.883903 | 0.90105  | 0.661349 | 0.222392 | 0.797895 | 1.108653 |
| Q9Y6W5 | Wiskott-Alk WASF2 WA    | 0.798669 | 0.342063 | 0.405256 | 0.354182 | 0.114333 | 0.475242 | 0.677432 | 0.567652 | 0.400824 | 0.462841 |

|        |              |            |          |          |          |          |          |          |          |          |          |          |
|--------|--------------|------------|----------|----------|----------|----------|----------|----------|----------|----------|----------|----------|
| Q9Y6X4 | Soluble lar  | FAM169A    | -0.70723 | -0.41245 | -0.11704 | -0.36282 | 0.149434 | -0.16842 | -0.32371 | -0.23739 | 0.327575 | 0.030253 |
| Q9Y6Y8 | SEC23-inte   | SEC23IP M  | 0.187292 | -0.06899 | 0.514292 | 0.459042 | 0.422988 | 0.050518 | 0.288473 | 0.36158  | 0.284175 | 0.632833 |
| A6H8Y1 | Transcripti  | BDP1 KIAA  | NA       | NA       | -3.57719 | -3.67557 | -2.95606 | -4.34395 | -3.74723 | -3.16993 | -3.21299 | -3.44184 |
| A8MSI8 | LYR motif-c  | LYRM9 C17  | NA       | NA       | -2.10512 | -3.14505 | -2.51245 | -2.95693 | -2.9301  | -1.80735 | -3.25739 | -3.21945 |
| O60293 | Zinc finger  | ZFC3H1 CC  | NA       | NA       | -3.6734  | -3.52356 | -3.59991 | -3.65208 | -3.61599 | -3.02308 | -3.16993 | -3.26127 |
| O75179 | Ankyrin reę  | ANKRD17 C  | NA       | NA       | -3.62449 | -3.38606 | -3.79256 | -4.34395 | NA       | NA       | -3.84094 | -3.45478 |
| O95236 | Apolipopro   | APOL3      | NA       | NA       | -1.93147 | -2.84549 | NA       | NA       | -2.89162 | -2.848   | -3.55695 | -3.34873 |
| P30456 | HLA class I  | HLA-A HLA  | NA       | NA       | 0.679735 | 0.676512 | -1.26326 | -0.04379 | -1.85415 | -1.93289 | -2.80357 | -2.75536 |
| P30462 | HLA class I  | HLA-B HLA  | NA       | NA       | -2.15634 | -1.9386  | -1.43965 | -1.71017 | 1.984051 | 1.874743 | -3.67243 | -2.6028  |
| P32297 | Neuronal a   | CHRNA3 N   | NA       | NA       | -4.13906 | -2.89129 | -3.27798 | -3.52083 | -4.23266 | -3.88982 | -3.61353 | -3.30433 |
| P41743 | Protein kin  | PRKCI DXS  | NA       | NA       | -3.4021  | -3.59756 | NA       | NA       | -4.55459 | -4.27684 | -3.21299 | -3.06333 |
| P53539 | Protein fos  | FOSB GOS3  | NA       | NA       | -3.57719 | -3.67557 | -2.69302 | -3       | -3.81762 | -2.93289 | NA       | NA       |
| P62699 | Protein yip  | YPEL5 CGI  | NA       | NA       | -3.62449 | -3.14505 | -4.01495 | -3       | -3.3322  | -3.65535 | -3.5025  | -3.49075 |
| P82921 | 28S ribosor  | MRPS21 RF  | NA       | NA       | -2.46529 | -2.98751 | -2.55552 | -4.04439 | -3.28157 | -2.80735 | -3.73383 | -2.28264 |
| Q03052 | POU doma     | POU3F1 OC  | NA       | NA       | -4.07195 | -3.38606 | NA       | NA       | -1.48134 | -1.36257 | -3.45003 | -3.95641 |
| Q12983 | BCL2/aden    | BNIP3 NIP3 | NA       | NA       | -3.4021  | -3.26053 | -4.01495 | -1.68684 | -2.05209 | -2.72935 | -3.00946 | -3.70487 |
| Q14493 | Histone RN   | SLBP HBP   | NA       | NA       | -2.48699 | -2.59756 | -3.51245 | -3.34395 | -4.23266 | -4.27684 | -2.1913  | -2.32636 |
| Q4FZB7 | Histone-lys  | KMT5B SU   | NA       | NA       | -2.24598 | -1.84549 | -3.2076  | -3.34395 | -1.94973 | -2.76783 | -3.86507 | -3.26127 |
| Q5T3J3 | Ligand-dep   | LRIF1 C1or | NA       | NA       | -4.28345 | -4.38606 | -3.27798 | -4.23704 | -3.43911 | -2.97728 | -2.3505  | -3.1788  |
| Q7L7X3 | Serine/thre  | TAOK1 KIA  | NA       | NA       | -3.4021  | -3.14505 | -3.69302 | -4.34395 | -3.74723 | -3.72935 | -2.97199 | -3.82517 |
| Q7L8L6 | FAST kinas   | FASTKD5 K  | NA       | NA       | -3.24598 | -4.52356 | -3.35199 | -2.91511 | -4.05209 | -3.80735 | -2.97199 | -3.59384 |
| Q8N228 | Sex comb c   | SCML4      | NA       | NA       | -2.4021  | -3.32193 | -4.01495 | -3.34395 | NA       | NA       | -4.16993 | -3.26127 |
| Q8N668 | COMM dor     | COMMD1 C   | NA       | NA       | -3.48699 | -3.03814 | -4.14048 | -2.91511 | NA       | NA       | -4.25739 | -3.34873 |
| Q8N8V4 | Ankyrin reę  | ANKS4B HA  | NA       | NA       | -0.67963 | -1.67557 | -1.81855 | -1.01097 | -1       | -1.09464 | -1.13845 | -0.58054 |
| Q8N9B5 | Junction-m   | JMY        | NA       | NA       | -3.94642 | -3.45317 | -3.79256 | -4.04439 | -2.03103 | -3.07039 | -4.55695 | -3.64829 |
| Q92817 | Envoplakin   | EVPL       | NA       | NA       | -1.13906 | -1.24558 | -0.85845 | -0.36491 | -1.48134 | -0.96605 | -1.10764 | -0.38294 |
| Q96GM8 | Target of E  | TOE1       | NA       | NA       | -3.4021  | -3.0906  | -3.69302 | -3       | -4.43911 | -3.45372 | NA       | NA       |
| Q96QU8 | Exportin-6   | XPO6 KIAA  | NA       | NA       | -4.07195 | -3.0906  | NA       | NA       | -2.13955 | -2.16993 | -3.04793 | -3.64829 |
| Q96RT7 | Gamma-tul    | TUBGCP6 C  | NA       | NA       | -3.10512 | -3.26053 | -2.95606 | -3.72247 | -2.9301  | -3.97728 | -3.39941 | -3.21945 |
| Q9BU61 | NADH dehy    | NDUFAF3 C  | NA       | NA       | -3.48699 | -1.67557 | -3.59991 | -2.91511 | -1.87276 | -1.78746 | -1.59918 | -2.41799 |
| Q9BWG4 | Single-strar | SSBP4      | NA       | NA       | -2.4021  | -3.20163 | -2.55552 | -1.75899 | -1.89162 | -1.48543 | -1.93546 | -1.6763  |
| Q9BX59 | Tapasin-rel  | TAPBPL     | NA       | NA       | -3.72403 | -3.32193 | -4.14048 | -4.58496 | -3.01027 | -3.45372 | NA       | NA       |
| Q9C0B7 | Transport    | TANGO6 KI  | NA       | NA       | -3.53138 | -3.20163 | NA       | NA       | -3.28157 | -3.33342 | -4.45003 | -4.64829 |

|        |                         |    |    |          |          |          |          |          |          |          |          |
|--------|-------------------------|----|----|----------|----------|----------|----------|----------|----------|----------|----------|
| Q9H5V9 | UPF0428 p CXorf56       | NA | NA | -3.36146 | -3.9386  | -3.07635 | -2.95693 | NA       | NA       | -2.76911 | -3.6028  |
| Q9HBF4 | Zinc finger ZFYVE1 DF   | NA | NA | -4.28345 | -3.45317 | -3.07635 | -3.72247 | -3.68012 | -3.33342 | -4.16993 | -4.26127 |
| Q9NPJ6 | Mediator o MED4 ARC     | NA | NA | -1.97679 | -2.0906  | -2.69302 | -2.23704 | -3.28157 | -3.22239 | -2.30319 | -2.1788  |
| Q9NR81 | Rho guanin ARHGEF3      | NA | NA | -3.24598 | -3.0906  | -3.51245 | -3       | -3.28157 | -3.22239 | -4.45003 | -3.82517 |
| Q9UEU0 | Vesicle trar VTI1B VTI1 | NA | NA | -1.85896 | -1.91475 | -1.22487 | -1.81558 | -1.91073 | -1.80735 | -1.59918 | -1.64829 |
| Q9UHQ4 | B-cell receę BCAP29 BA  | NA | NA | -2.44392 | -1.47045 | -3.51245 | -2.91511 | -3.89162 | -0.94386 | -3.30319 | -3.34873 |
| Q9Y3E1 | Hepatoma- HDGFL3 HC     | NA | NA | -3.32193 | -3.52356 | NA       | NA       | -4.43911 | -4.39232 | -3.21299 | -3.44184 |
| Q9Y679 | Lipid droplę AUP1       | NA | NA | -3.88753 | -4.14505 | NA       | NA       | -2.09516 | -2.97728 | -4.45003 | -3.49075 |
| P30479 | HLA class I HLA-B HLAI  | NA | NA | NA       | NA       | -4.27798 | -2.65208 | 2.829115 | 2.619842 | -3.08746 | -2.46609 |
| Q8N3J5 | Protein phę PPM1K PP    | NA | NA | NA       | NA       | -3.07635 | -3.95693 | -4.43911 | -3.88982 | -4.3505  | -3.64829 |
| Q9BXB4 | Oxysterol-ę OSBPL11 O   | NA | NA | NA       | NA       | -3.59991 | -4.1375  | -3.38466 | -3.58496 | -3.08746 | -3.82517 |

**Supplemental Table 2.** Log2/median normalized TMT reporter intensities of phosphorylation sites of 24 h IL-7 stimulation of human primary T cell phosphoproteome

| pSite.in.Mas | Accessions  | Protein names | Gene names                          | Control_1 | Primed_1 | Control_2 | Primed_2 | Control_3 | Primed_3 | Control_4 | Primed_4 | Control_5 | Primed_5 |
|--------------|-------------|---------------|-------------------------------------|-----------|----------|-----------|----------|-----------|----------|-----------|----------|-----------|----------|
| 1            | S-10_P2935I | P29350        | Tyrosine-protein PTPN6 HCP I        | 0.3877    | 0.0660   | -0.4241   | -0.0636  | 0.0480    | -0.3520  | 0.5108    | 0.2048   | -0.5643   | -0.7534  |
| 2            | S-10_P4652I | P46527        | Cyclin-dependen CDKN1B KIP          | 0.9955    | 1.0225   | 0.8536    | 1.0541   | 0.9147    | 0.9608   | 0.8809    | 0.9423   | 0.9497    | 0.8876   |
| 3            | S-100_P231I | P23193        | Transcription elo TCEA1 GTF2I       | 0.3692    | 0.7076   | -0.0250   | 0.1227   | 0.1352    | 0.1377   | 0.1701    | 0.1673   | 0.0593    | 0.1108   |
| 4            | S-100_Q142  | Q14258        | E3 ubiquitin/ISG: TRIM25 EFP        | 0.4366    | 0.4932   | 0.7220    | 0.5039   | 0.3317    | 0.5325   | 0.4503    | 0.6691   | 0.8362    | 0.7243   |
| 5            | S-100_Q96R  | Q96RR4        | Calcium/calmodu CAMKK2 CAI          | -0.5370   | -0.4022  | -0.1959   | -0.1797  | 0.1039    | 0.0119   | -0.3232   | -0.2298  | -0.4409   | -0.4994  |
| 6            | S-100_Q9H3  | Q9H307        | Pinin (140 kDa ni PNN DRS ME        | -0.9820   | -1.8046  | -1.0664   | 0.5201   | -0.2301   | -0.7645  | -0.8276   | -0.3033  | -1.7487   | -1.0780  |
| 7            | S-1004_Q95  | Q95104        | SR-related and C SCAF4 KIAA1        | -1.8329   | -0.6752  | 0.9098    | 0.8737   | 0.1643    | -0.4914  | -0.0897   | -1.0657  | -0.4094   | -0.2773  |
| 8            | S-1004_Q9U  | Q9UKV3        | Apoptotic chrom ACIN1 ACINI         | 0.2462    | 0.3432   | 0.1020    | 0.1960   | 0.0805    | 0.0497   | 0.2166    | 0.0626   | 0.1749    | 0.2740   |
| 9            | S-1008_Q6Z  | Q6ZU80        | Centrosomal pro CEP128 C14I         | -1.5175   | -1.3496  | -1.0108   | -0.3826  | -0.9092   | -1.0032  | -0.5514   | -0.6494  | -1.4675   | -1.3722  |
| 10           | S-101_Q9P1  | Q9P1Y6        | PHD and RING fir PHRF1 KIAA:        | -1.7948   | -1.6646  | -2.2140   | -1.9562  | -2.3192   | -2.0392  | -2.0953   | -2.4564  | -1.8671   | -1.6630  |
| 11           | S-1010_Q5V  | Q5VUA4        | Zinc finger protei ZNF318 HRII      | 0.6918    | 0.6389   | 1.3509    | 1.0627   | 1.2056    | 1.0683   | 0.9329    | 1.0235   | 1.4124    | 1.1749   |
| 12           | S-1014_Q9U  | Q9UKJ3        | G patch domain- GPATCH8 GF          | 0.3385    | 0.5274   | 0.3340    | 0.2313   | 0.2411    | 0.0059   | 0.2043    | 0.0227   | 0.2922    | 0.2015   |
| 13           | S-1014_Q9U  | Q9UQ35        | Serine/arginine r SRRM2 KIAA        | 0.8110    | 0.8722   | 1.1219    | 0.9233   | 0.9513    | 0.9213   | 0.8852    | 0.8350   | 0.9246    | 0.8821   |
| 14           | S-1017_Q95  | Q95785        | Protein Wiz (Wid WIZ ZNF803         | 0.8355    | 0.8122   | 0.7872    | 0.6896   | 0.6436    | 0.6163   | 0.7481    | 0.5236   | 0.8179    | 0.8309   |
| 15           | S-102_O753  | O75351        | Vacuolar protein VPS4B SKD1         | 0.7985    | 0.9098   | 0.3556    | 0.7094   | 0.3505    | 0.5092   | 0.5140    | 0.6981   | 0.0646    | -0.0841  |
| 16           | S-102_P170I | P17096        | High mobility grc HMGA1 HM          | -0.5715   | 0.0932   | -0.0841   | 0.0177   | 0.1022    | -0.2961  | -0.0262   | -0.0498  | -0.3905   | 0.2358   |
| 17           | S-102_P541I | P54105        | Methylosome su CLNS1A CLCI          | -0.7823   | -0.8143  | -0.8873   | -0.9528  | -0.8194   | -0.7848  | -0.8912   | -1.0278  | -0.6888   | -0.6711  |
| 18           | S-102_Q9GZ  | Q9GZT3        | SRA stem-loop-ir SLIRP C14orI       | 0.3918    | 0.3327   | 0.1214    | 0.1913   | 0.0426    | 0.1266   | 0.1503    | 0.2285   | 0.2535    | 0.1479   |
| 19           | S-1021_P13I | P13612        | Integrin alpha-4 IITGA4 CD49I       | 1.2154    | 1.3498   | 0.0844    | 0.0846   | -0.2606   | -0.0377  | 0.1303    | -0.0247  | -0.3974   | -0.5837  |
| 20           | S-1028_Q04  | Q04637        | Eukaryotic transl EIF4G1 EIF4I      | -0.2696   | -0.3490  | 0.2316    | -0.5498  | 0.1310    | -0.3108  | 0.2344    | 0.1590   | 0.0698    | 0.0419   |
| 21           | S-1029_Q4L  | Q4LE39        | AT-rich interactiv ARID4B BRC       | -0.4804   | -0.6489  | -0.1745   | -0.3621  | -0.3874   | -0.2780  | -0.5066   | -0.5076  | -0.2571   | -0.0578  |
| 22           | S-103_P164I | P16402        | Histone H1.3 (Hi: H1-3 H1F3 H       | 0.8151    | 0.9250   | 1.9450    | 0.9929   | 1.5398    | 1.5175   | 1.8212    | 1.4004   | 2.3400    | 2.3520   |
| 23           | S-103_Q9Y6  | Q9Y6W5        | Wiskott-Aldrich s WASF2 WAV         | 1.1501    | 1.1636   | 1.5493    | 1.3567   | 0.9137    | 1.2537   | 1.0716    | 1.2677   | 1.3039    | 0.9456   |
| 24           | S-1031_Q95  | Q95466        | Formin-like protei FMNL1 C17c       | 0.6670    | 0.7598   | 1.0993    | 0.9941   | 0.6543    | 1.1979   | 1.0795    | 1.3414   | 0.7320    | 0.3690   |
| 25           | S-1033_Q99  | Q99683        | Mitogen-activate MAP3K5 ASI         | -0.2458   | -0.2326  | -0.0907   | -0.3735  | -0.4514   | -0.5124  | -0.6480   | -0.5317  | -0.9883   | -0.9783  |
| 26           | S-1034_Q9B  | Q9BSJ8        | Extended synapt ESYT1 FAM6          | -0.8233   | -0.7500  | -1.0603   | -0.9547  | -1.1171   | -1.3501  | -1.0547   | -1.3044  | -1.4815   | -1.3419  |
| 27           | S-1039_Q92  | Q92835        | Phosphatidylinos INPP5D SHIF        | 0.6474    | 0.7721   | 0.5842    | 0.5469   | 0.5877    | 0.4549   | 0.6485    | 0.7499   | 0.1793    | 0.3047   |
| 28           | S-104_O151  | O15173        | Membrane-assoc PGRMC2 DG            | 0.4577    | 0.4298   | 0.3597    | 0.3332   | 0.2076    | 0.2067   | 0.3240    | 0.2017   | -0.0380   | -0.0481  |
| 29           | S-104_O431  | O43159        | Ribosomal RNA- $\gamma$ RRP8 KIAA0: | -1.9123   | -2.2655  | -2.3198   | -2.1322  | -2.5585   | -2.2284  | -2.2848   | -2.4314  | -2.6556   | -1.9707  |
| 30           | S-104_P319I | P31943        | Heterogeneous r HNRNPH1 H           | -0.9089   | -0.9967  | -0.8719   | -0.8594  | -1.2829   | -0.9911  | -1.0382   | -1.2244  | -1.2416   | -1.3008  |
| 31           | S-104_P490I | P49006        | MARCKS-related MARCKSL1 M           | -0.7885   | -0.4726  | 1.1123    | 0.8746   | 0.8051    | 0.1550   | 1.3626    | 0.8938   | 1.0309    | 0.4979   |
| 32           | S-104_Q151  | Q15121        | Astrocytic phosp PEA15              | 0.6254    | 0.5563   | 1.7599    | 1.2583   | 1.3813    | 0.9881   | 1.5793    | 1.3765   | 0.8464    | 0.4805   |
| 33           | S-104_Q8N2  | Q8N201        | Integrator compl INTS1 KIAA1        | -1.6687   | -1.5630  | -2.0533   | -1.5655  | -1.7746   | -1.4260  | -1.6178   | -1.2606  | -1.7663   | -1.8359  |
| 34           | S-1045_Q7Z  | Q7Z3B3        | KAT8 regulatory KANSL1 CEN          | -0.3116   | -0.4051  | -0.4157   | -0.3193  | -0.4364   | -0.2654  | -0.2228   | -0.3669  | -0.1932   | -0.0299  |
| 35           | S-105_P053I | P05387        | 60S acidic riboso RPLP2 D11S:       | -0.2077   | -0.4347  | -0.1923   | -0.9120  | -0.2540   | -0.4441  | -0.3363   | -0.4273  | 0.0423    | -0.1778  |
| 36           | S-105_P561I | P56181        | NADH dehydrog $\epsilon$ NDUFV3     | -2.3641   | -2.2339  | -1.1616   | -1.8691  | -1.0785   | -1.5124  | -1.0144   | -1.0466  | -1.1321   | -1.1110  |
| 37           | S-105_Q8IXI | Q8IXQ4        | GPALPP motifs-c GPALPP1 KIA         | 0.5630    | 0.5799   | 0.5224    | 0.5871   | 0.3629    | 0.5461   | 0.3982    | 0.4171   | 0.8927    | 1.0532   |

|    |            |        |                                                   |         |         |         |         |         |         |         |         |         |         |
|----|------------|--------|---------------------------------------------------|---------|---------|---------|---------|---------|---------|---------|---------|---------|---------|
| 38 | S-105_Q9Y6 | Q9Y6K1 | DNA (cytosine-5) DNMT3A                           | -0.0551 | -0.1719 | -0.1363 | -0.1409 | 0.0930  | -0.2647 | 0.0369  | -0.1239 | -0.4159 | -0.1741 |
| 39 | S-1052_Q7Z | Q7Z6E9 | E3 ubiquitin-prot RBBP6 P2PR                      | 0.7261  | 0.8722  | 1.1363  | 1.3407  | 1.5580  | 1.1157  | 1.4254  | 1.2226  | 1.2220  | 1.4154  |
| 40 | S-1057_Q8N | Q8N1G0 | Zinc finger protei ZNF687 KIAA                    | -0.7948 | -0.7740 | -0.3853 | -0.4468 | -0.5396 | -0.3425 | -0.3812 | -0.4171 | -0.3452 | -0.2252 |
| 41 | S-106_P245 | P24534 | Elongation factor EEF1B2 EEF1                     | -0.5742 | -0.4407 | -1.0253 | -0.6692 | -0.6654 | -0.5274 | -0.7470 | -0.5273 | -0.5876 | -0.3378 |
| 42 | S-106_P485 | P48556 | 26S proteasome PSMD8                              | 0.0995  | 0.0350  | 0.2065  | -0.0197 | 0.2856  | -0.2162 | 0.4020  | 0.0831  | 0.2730  | 0.4591  |
| 43 | S-106_P490 | P49023 | Paxillin PXN                                      | 0.5234  | 0.4955  | 0.5171  | 0.5275  | 0.3592  | 0.4324  | 0.7945  | 0.7403  | 0.0599  | -0.0052 |
| 44 | S-106_Q5TD | Q5TDH0 | Protein DDI1 homolog DDI2                         | 0.1329  | 0.1159  | -0.3991 | -0.5087 | -0.3330 | -0.3653 | -0.3528 | -0.1345 | -0.2727 | 0.0837  |
| 45 | S-1061_P46 | P46100 | Transcriptional repressor ATRX RAD54              | 0.5196  | 0.3275  | 0.6194  | 0.9465  | 0.9721  | 0.8297  | 0.9302  | 0.8630  | 0.8413  | 0.7801  |
| 46 | S-1067_Q9U | Q9UQE7 | Structural maintenance of chromosomes SMC3 BAM1   | -0.9433 | -1.3448 | -0.0052 | 0.0455  | -0.5158 | 0.2778  | -0.2737 | 0.0362  | 0.3310  | 0.2778  |
| 47 | S-107_P525 | P52597 | Heterogeneous ribosomal protein HNRNPF HN         | -0.7304 | -0.6062 | -0.5860 | -0.6357 | -0.5105 | -0.4706 | -0.5554 | -0.5743 | -0.7841 | -0.8779 |
| 48 | S-107_Q9UK | Q9UKY7 | Protein CDV3 homolog CDV3 H41                     | 0.2666  | 0.4039  | 0.2236  | 0.1598  | 0.3302  | 0.3990  | 0.1503  | 0.7154  | 0.4904  | 0.3217  |
| 49 | S-1072_Q6P | Q6PD62 | RNA polymerase CTR9 KIAA01                        | -4.3183 | -4.2391 | -2.6735 | -2.2712 | -2.6026 | -2.5295 | -2.1176 | -1.9758 | -2.4930 | -2.2914 |
| 50 | S-1073_P27 | P27816 | Microtubule-associated MAP4                       | 1.7052  | 1.5861  | 1.4320  | 1.3456  | 0.7525  | 0.8783  | 1.0026  | 0.7367  | 0.3788  | 0.4805  |
| 51 | S-1074_Q9U | Q9UQE7 | Structural maintenance of chromosomes SMC3 BAM1   | -0.2893 | -0.4803 | -1.0686 | -0.6834 | -0.9991 | -1.1736 | -0.3055 | -0.3729 | -0.7206 | -0.4564 |
| 52 | S-1075_Q9U | Q9UMZ2 | Synergin gamma SYNRG AP1C                         | 0.3241  | 0.0099  | 0.5857  | 0.7711  | 0.7721  | 0.9392  | 0.3762  | 0.8359  | 0.4241  | 0.1479  |
| 53 | S-1076_Q9U | Q9UKJ3 | G patch domain-containing GPATCH8 GF              | -0.4905 | -0.4422 | 0.0094  | -0.1797 | 0.2096  | 0.2049  | -0.1707 | 0.0569  | 0.4501  | -0.0299 |
| 54 | S-1078_O95 | O95248 | Myotubularin-related SBF1 MTMR                    | -0.5291 | -0.5403 | -0.9127 | -0.7627 | -0.8522 | -0.5533 | -0.7579 | -0.7177 | -0.6053 | -0.6427 |
| 55 | S-108_O751 | O75152 | Zinc finger CCCH ZC3H11A KIAA                     | 0.7007  | 0.4662  | 0.8414  | 0.8521  | 0.6600  | 0.6919  | 0.8153  | 0.9239  | 0.5387  | 0.3340  |
| 56 | S-108_Q148 | Q14839 | Chromodomain-like CHD4                            | 0.6940  | 0.5927  | -0.1627 | 0.4951  | 0.6162  | 0.7725  | 0.1930  | 0.2985  | -0.0982 | 0.0090  |
| 57 | S-108_Q96L | Q96LT9 | RNA-binding region RNPC3 KIAA                     | -0.5415 | -0.5531 | -0.7311 | -0.4403 | -0.7465 | -0.6466 | -0.6532 | -0.6414 | -0.8397 | -0.6257 |
| 58 | S-108_Q9H6 | Q9H6Z4 | Ran-binding protein RANBP3                        | 0.6567  | 0.8920  | 0.4657  | 0.1614  | 0.2016  | 0.0454  | 0.0955  | 0.1342  | 0.4319  | 0.1868  |
| 59 | S-108_Q9Y4 | Q9Y478 | 5'-AMP-activated protein kinase PRKAB1 AMI        | 1.2500  | 1.0628  | 0.3636  | 0.8688  | 0.7699  | 0.9699  | 1.1596  | 0.8613  | 0.0859  | 0.1030  |
| 60 | S-1082_Q70 | Q70J99 | Protein unc-13 homolog UNC13D                     | -0.9468 | -1.2209 | -1.5427 | -1.6029 | -0.7714 | -1.0701 | -1.1722 | -1.0785 | -1.3669 | -1.9309 |
| 61 | S-1083_Q9U | Q9UQ35 | Serine/arginine rich SRRM2 KIAA                   | 1.4350  | 1.7536  | 1.6961  | 1.7838  | 1.7745  | 1.5194  | 1.8614  | 1.6939  | 1.6050  | 1.6102  |
| 62 | S-109_Q8NE | Q8NDT2 | Putative RNA-binding RBM15B OT                    | -0.0780 | -0.1516 | -0.0243 | -0.2499 | -0.1100 | -0.1804 | -0.0196 | -0.2865 | -0.2997 | -0.2013 |
| 63 | S-109_Q8NE | Q8NE71 | ATP-binding cassette ABCF1 ABC5                   | 0.4000  | 0.2156  | 0.5829  | 0.4397  | 0.6460  | 0.6734  | 0.4254  | 0.5161  | 0.5556  | 0.4412  |
| 64 | S-109_Q96T | Q96T37 | RNA-binding protein RBM15 OTT                     | -3.6630 | -3.1188 | -2.5892 | -2.7687 | -2.6831 | -2.8995 | -2.1751 | -2.3281 | -2.8296 | -3.2358 |
| 65 | S-109_Q9BL | Q9BUQ8 | Probable ATP-dependent DDX23                      | 0.3385  | 0.5189  | 0.2944  | 0.1975  | 0.3606  | -0.0608 | 0.0623  | 0.0599  | 0.3018  | 0.2159  |
| 66 | S-1093_Q9Y | Q9Y4F3 | Meiosis regulator MARF1 KIAA                      | -0.6487 | -0.4528 | -0.6970 | -0.5369 | -0.8357 | -0.7645 | -0.7318 | -0.9939 | -0.6556 | -0.8245 |
| 67 | S-1094_Q12 | Q12888 | TP53-binding protein TP53BP1                      | 0.8882  | 0.7085  | 0.9772  | 0.7432  | 1.0136  | 1.0897  | 0.8544  | 1.0743  | 1.1626  | 1.2467  |
| 68 | S-1095_O95 | O95248 | Myotubularin-related SBF1 MTMR                    | -0.4854 | -0.3920 | -0.4241 | -0.7036 | -0.4871 | -0.3053 | -0.8253 | -0.3552 | -0.2112 | -0.2695 |
| 69 | S-11_P1875 | P18754 | Regulator of chromosome segregation RCC1 CHC1     | -0.3712 | -0.1958 | -0.4046 | -0.4493 | -0.4804 | -0.3927 | -0.4212 | -0.3665 | -0.3082 | -0.4890 |
| 70 | S-11_Q9268 | Q92685 | Dol-P-Man:Man(6-phosphate) transferase ALG3 NOT N | 1.1997  | 1.1072  | 0.7372  | 1.1983  | 1.2856  | 1.2985  | 1.1249  | 1.2311  | 0.5538  | 0.6384  |
| 71 | S-110_Q134 | Q13425 | Beta-2-syntrophin SNTB2 D16S                      | -0.1294 | -0.1816 | 0.0136  | -0.0361 | -0.2032 | -0.2048 | -0.1528 | -0.2867 | -0.6618 | -0.6570 |
| 72 | S-1103_Q9U | Q9UK61 | Protein TASOR (containing TASOR C3orf1            | 0.8732  | 0.8535  | 0.7980  | 0.6775  | 0.8342  | 0.9320  | 0.9022  | 0.9446  | 0.8642  | 0.7204  |
| 73 | S-111_Q8W  | Q8WWM7 | Ataxin-2-like protein ATXN2L A2D                  | -0.8137 | -0.8699 | -0.8680 | -0.7417 | -0.7250 | -0.6954 | -0.6789 | -0.6514 | -0.8814 | -0.7383 |
| 74 | S-1111_Q13 | Q13428 | Treacle protein (containing TCOF1                 | -0.3071 | -0.1865 | -0.0555 | -0.0975 | 0.0987  | 0.1348  | -0.0664 | -0.0309 | -0.5040 | -0.5251 |
| 75 | S-1112_Q08 | Q08999 | Retinoblastoma-like RBL2 RB2                      | -0.3026 | -0.2248 | -0.1947 | -0.4812 | -0.4539 | -0.2943 | -0.4086 | -0.2958 | -0.1740 | -0.4267 |
| 76 | S-1113_Q92 | Q92794 | Histone acetyltransferase KAT6A MOZ               | -1.0145 | -0.9005 | 0.4045  | 0.4683  | 0.1887  | 0.3659  | 0.1781  | 0.1549  | 0.4624  | 0.3861  |

|     |                   |                                 |         |         |         |         |         |         |         |         |         |         |
|-----|-------------------|---------------------------------|---------|---------|---------|---------|---------|---------|---------|---------|---------|---------|
| 77  | S-1114_Q5T Q5T1M5 | FK506-binding pr FKBP15 KIAA    | -1.2309 | -1.0762 | -1.2336 | -1.3193 | -1.1708 | -1.2179 | -1.2628 | -1.4191 | -1.2696 | -1.1027 |
| 78  | S-112_O950 Q95049 | Tight junction pr TJP3 ZO3      | -0.4332 | -0.1033 | -0.3211 | -0.5113 | -0.5639 | -0.2708 | -0.1064 | -0.2120 | -0.2355 | -0.1264 |
| 79  | S-112_Q9NV Q9NVM6 | DnaJ homolog su DNAJC17         | -4.1163 | -4.8237 | -2.9292 | -2.0461 | -2.9399 | -3.6601 | -2.4377 | -2.4733 | -3.4471 | -3.9555 |
| 80  | S-1124_Q9U Q9UQ35 | Serine/arginine r SRRM2 KIAA    | 1.0126  | 0.9961  | 0.4351  | -0.0143 | 0.3228  | 0.2126  | 0.7231  | 0.5394  | 0.5270  | 0.5124  |
| 81  | S-113_O608 Q60841 | Eukaryotic transl EIF5B IF2 KIA | 0.1501  | 0.1849  | 0.2652  | 0.0605  | 0.1426  | 0.1287  | -0.0949 | -0.0939 | 0.2089  | 0.0870  |
| 82  | S-113_Q151 Q15185 | Prostaglandin E s PTGES3 P23    | 0.3904  | 0.4296  | -1.0126 | -0.6579 | -0.4092 | -1.0515 | -0.2722 | -1.0561 | -0.9832 | -1.0247 |
| 83  | S-113_Q167 Q16778 | Histone H2B typε H2BC21 H2E     | -0.5475 | 0.1562  | 0.4037  | 1.1219  | 1.4882  | 1.1409  | 0.9981  | 1.3498  | 0.0686  | 0.4563  |
| 84  | S-113_Q9BR Q9BRR9 | Rho GTPase-activ ARHGAP9        | -0.5110 | -0.6559 | -0.6685 | -0.5894 | -1.4948 | -1.1703 | -0.9082 | -0.9848 | -1.0927 | -0.9090 |
| 85  | S-113_Q9H1 Q9H1E3 | Nuclear ubiquitin NUCKS1 NU     | -0.1464 | -0.1624 | -0.1940 | -0.4997 | 0.1266  | -0.3061 | -0.4862 | -0.3863 | 0.1668  | 0.1632  |
| 86  | S-1132_Q9U Q9UQ35 | Serine/arginine r SRRM2 KIAA    | -0.2433 | -0.4052 | 0.3952  | 0.5207  | 0.3061  | 0.3380  | 0.5148  | 0.7565  | 0.3504  | 0.2886  |
| 87  | S-114_P313 P31323 | cAMP-dependen PRKAR2B           | -0.6802 | -0.7721 | -0.6194 | -0.7269 | -1.3423 | -1.1939 | -0.8579 | -0.8058 | -0.9961 | -1.1648 |
| 88  | S-114_Q9NF Q9NP64 | Nucleolar protein ZCCHC17 PS    | -0.2479 | 0.1482  | 0.2987  | 0.7511  | 0.6705  | 0.4543  | 0.5226  | 0.0000  | -0.1010 | 0.1268  |
| 89  | S-114_Q9U Q9UNZ2  | NSFL1 cofactor p NSFL1C UBX     | 1.4774  | 1.3854  | 1.5251  | 1.5082  | 1.5951  | 1.6725  | 1.3232  | 1.4578  | 2.0451  | 2.0761  |
| 90  | S-1140_P20 P20701 | Integrin alpha-L (ITGAL CD11/   | 0.1895  | 0.1769  | -0.4727 | 0.0369  | -1.2784 | -0.2870 | -0.2381 | -0.1667 | -1.1122 | -1.1910 |
| 91  | S-1144_P78 P78312 | Protein FAM193 FAM193A C/       | -0.0704 | -0.1200 | 0.2414  | -0.2165 | -0.1360 | 0.0739  | -0.1275 | -0.1013 | -0.1150 | -0.2207 |
| 92  | S-1145_Q14 Q14980 | Nuclear mitotic ε NUMA1 NM      | -2.2140 | -2.2549 | -2.0664 | -1.9087 | -1.7809 | -2.4061 | -2.0039 | -2.2388 | -2.4857 | -2.1939 |
| 93  | S-115_Q096 Q09666 | Neuroblast differ AHNAK PM2     | -1.2711 | -1.3852 | -0.9744 | -1.1003 | -1.6015 | -1.1018 | -1.3628 | -1.3281 | -1.5837 | -1.5703 |
| 94  | S-1152_Q9U Q9UQ35 | Serine/arginine r SRRM2 KIAA    | -0.8622 | -0.8759 | 0.0494  | -0.0786 | -0.0496 | -0.1854 | 0.0078  | 0.0932  | 0.0499  | 0.1880  |
| 95  | S-1155_O15 O15085 | Rho guanine nuc ARHGEF11 K      | -1.7036 | -1.6894 | -1.5155 | -1.6412 | -1.6138 | -1.2744 | -1.8048 | -1.7127 | -1.3271 | -1.0944 |
| 96  | S-1157_Q5U Q5UIP0 | Telomere-associ RIF1            | -0.5213 | -0.7128 | -0.1971 | 0.0796  | -0.2150 | -0.0180 | -0.2274 | -0.1581 | -0.2202 | -0.1504 |
| 97  | S-1158_P61 P61129 | Zinc finger CCCH ZC3H6 KIAA     | -0.6544 | -0.7816 | -0.7863 | -0.4228 | -1.0028 | -0.8829 | -0.5029 | -0.6323 | -0.6393 | -0.7297 |
| 98  | S-116_Q151 Q15121 | Astrocytic phosph PEA15         | 0.1493  | 0.1210  | 1.0459  | 0.4836  | 0.8395  | 0.0654  | 0.7772  | 0.3688  | 0.3049  | -0.0511 |
| 99  | S-116_Q153 Q15311 | RalA-binding pro RALBP1 RLIP    | -0.2915 | -0.3350 | -0.5021 | 0.0106  | 0.3184  | -0.6621 | 0.5172  | -0.0529 | -0.4268 | -0.2993 |
| 100 | S-116_Q8N3 Q8N3X1 | Formin-binding p FNBP4 FBP3     | -0.4255 | -0.8438 | -0.4496 | -0.4521 | -0.5851 | -0.7303 | -0.5801 | -0.5781 | -0.3206 | -0.1974 |
| 101 | S-116_Q9H4 Q9H4Z3 | mRNA (2'-O-methyl PCIF1 C20r    | 0.9791  | 0.7083  | 0.8969  | 0.6356  | 0.8415  | 1.0155  | 1.0302  | 0.7403  | 1.2254  | 0.9884  |
| 102 | S-116_Q9U Q9UH99  | SUN domain-con SUN2 FRIGG       | -0.0441 | 0.2317  | 0.1566  | 0.4292  | -0.0727 | -0.1973 | 0.2981  | 0.0377  | -0.1799 | 0.0306  |
| 103 | S-1165_P20 P20701 | Integrin alpha-L (ITGAL CD11/   | 0.5347  | 0.4452  | -0.4932 | 0.4186  | -0.1381 | -0.7051 | 0.4617  | -0.3948 | -1.3109 | -0.9936 |
| 104 | S-117_P368 P36871 | Phosphoglucom PGM1              | -0.1767 | -0.1479 | -0.4611 | -0.2352 | -0.5831 | -0.2424 | -0.4828 | -0.3261 | -0.3436 | -0.3200 |
| 105 | S-117_Q128 Q12846 | Syntaxin-4 (Rena STX4 STX4A     | 0.5095  | 0.6439  | 0.2485  | 0.3308  | 0.5822  | 0.9023  | 0.8409  | 0.9792  | 0.4737  | 0.3502  |
| 106 | S-117_Q5QJ Q5QJE6 | Deoxynucleotidy DNTTIP2 ERI     | -0.6123 | -0.7256 | -0.9445 | -0.7387 | -1.0364 | -0.6249 | -0.6258 | -0.8465 | -0.9987 | -0.9808 |
| 107 | S-1176_Q9U Q9UKV3 | Apoptotic chrom ACIN1 ACINI     | -3.0857 | -2.5728 | -1.4511 | -0.8822 | -1.1179 | -1.5820 | -1.2350 | -1.0216 | -1.3370 | -1.0013 |
| 108 | S-1179_Q7Z Q7Z6E9 | E3 ubiquitin-prot RBBP6 P2PR    | 0.2470  | 0.1789  | 0.2432  | 0.3137  | 0.1659  | 0.2279  | 0.1550  | 0.2595  | 0.3007  | 0.2628  |
| 109 | S-1179_Q9N Q9NRY4 | Rho GTPase-activ ARHGAP35 C     | 0.1783  | 0.3981  | -0.0350 | 0.1373  | -0.2193 | -0.1537 | -0.2078 | -0.1079 | -0.1696 | 0.0982  |
| 110 | S-118_Q86U Q86UU0 | B-cell CLL/lymph BCL9L DLNB     | 0.2133  | 0.5046  | 0.5647  | 0.6575  | 0.7094  | 0.4928  | 0.7519  | 0.6749  | 0.3880  | 0.5628  |
| 111 | S-118_Q8W Q8WYH8  | Inhibitor of grow ING5          | 0.2546  | 0.0839  | -0.1019 | -0.3507 | 0.1478  | -0.0701 | -0.1162 | -0.2865 | 0.2458  | 0.3989  |
| 112 | S-118_Q929 Q92934 | Bcl2-associated ε BAD BBC6 B    | 0.2485  | 0.2392  | 0.1992  | 0.2053  | 0.2473  | 0.2581  | 0.2541  | 0.4166  | 0.1622  | 0.2607  |
| 113 | S-1184_O14 O14497 | AT-rich interact ARID1A BAF     | -0.0553 | -0.1603 | 0.1992  | 0.1819  | 0.2442  | 0.5013  | 0.4264  | 0.4291  | 0.1423  | 0.1256  |
| 114 | S-119_O147 O14737 | Programmed cell PDCD5 TFAR      | -0.5688 | -0.7020 | -0.7349 | -0.7963 | -0.5998 | -0.3905 | -0.6098 | -0.4690 | -0.5245 | -0.3657 |
| 115 | S-119_P558 P55884 | Eukaryotic transl EIF3B EIF3S   | -2.2652 | -2.2443 | -1.2635 | -1.5708 | -1.1708 | -0.9589 | -1.3429 | -1.6205 | -1.2633 | -0.8498 |

|     |                    |                                |         |         |         |         |         |         |         |         |         |         |
|-----|--------------------|--------------------------------|---------|---------|---------|---------|---------|---------|---------|---------|---------|---------|
| 116 | S-119_Q8W' Q8WW12  | PEST proteolytic PCNP          | -0.4406 | -0.2852 | -0.4102 | -0.6551 | -0.3588 | -0.0842 | -0.3594 | -0.1378 | -0.1711 | -0.0944 |
| 117 | S-1195_Q29 Q29RF7  | Sister chromatid PDS5A KIAA    | -1.2140 | -1.8598 | -0.9028 | -1.2082 | -1.3284 | -1.2424 | -1.8603 | -1.5743 | -1.0571 | -0.8291 |
| 118 | S-12_P3561: P35611 | Alpha-adducin (E ADD1 ADDA     | -0.5501 | -0.7797 | -0.1406 | -0.1657 | -0.3146 | 0.1171  | -0.1547 | 0.0613  | -0.0625 | -0.2297 |
| 119 | S-12_Q1543 Q15435  | Protein phospho PPP1R7 SDS     | -1.5742 | -1.0553 | -0.3436 | -1.0233 | -0.8791 | -1.0119 | -1.1176 | -1.1211 | -0.7575 | -0.8429 |
| 120 | S-12_Q9UKT Q9UKT5  | F-box only protei FBXO4 FBX4   | -1.0036 | -0.7988 | -1.3409 | -1.3507 | -1.7250 | -1.9162 | -1.1722 | -1.5473 | -1.7886 | -1.5049 |
| 121 | S-120_O952 O95218  | Zinc finger Ran-b ZRANB2 ZIS   | -0.1849 | 0.4106  | 0.4335  | -0.0452 | 0.0373  | 0.1722  | -0.0183 | 0.1942  | 0.3403  | 0.4506  |
| 122 | S-120_P226 P22670  | MHC class II regu RFX1         | -0.3319 | -0.4437 | -0.1314 | -0.1302 | -0.2829 | -0.2076 | -0.2319 | -0.1736 | -0.3029 | -0.0524 |
| 123 | S-120_Q32N Q32MZ4  | Leucine-rich repε LRRFIP1 GCF  | -0.8576 | -0.9752 | -0.7164 | -0.8803 | -1.1118 | -1.1059 | -1.1448 | -1.0398 | -1.2112 | -0.4617 |
| 124 | S-1202_Q9P Q9P1Y6  | PHD and RING fir PHRF1 KIAA    | 0.1735  | 0.1149  | 0.1697  | 0.1373  | -0.0401 | 0.1762  | 0.0026  | 0.1848  | 0.1174  | 0.2788  |
| 125 | S-121_P062: P06239 | Tyrosine-protein LCK           | -0.0704 | -0.2721 | -0.4554 | -0.2951 | -0.2150 | 0.0511  | -0.0705 | 0.1522  | -0.3585 | -0.6468 |
| 126 | S-121_Q9H7 Q9H7D7  | WD repeat-contε WDR26 CDV      | -0.3595 | 0.0692  | 0.0824  | -0.0748 | -0.0824 | -0.1097 | -0.0196 | -0.1718 | -0.0941 | -0.1490 |
| 127 | S-121_Q9NF Q9NR30  | Nucleolar RNA hε DDX21         | 0.5639  | 0.5751  | 0.1029  | 0.1998  | 0.5637  | 0.3110  | 0.4956  | 0.2982  | 0.0784  | 0.0169  |
| 128 | S-121_Q9Y5 Q9Y5J1  | U3 small nucleolε UTP18 WDR    | 0.3484  | 0.6858  | 0.6558  | 1.1598  | 1.1684  | 1.1246  | 0.9424  | 1.0555  | 0.7429  | 1.0898  |
| 129 | S-1217_Q13 Q13813  | Spectrin alpha cε SPTAN1 NEA   | -0.6681 | -0.4676 | -0.3174 | -0.3725 | -0.1703 | -0.0909 | -0.4385 | -0.3581 | 0.4033  | 0.4251  |
| 130 | S-1219_Q9U Q9UQ35  | Serine/arginine r SRRM2 KIAA   | 2.1922  | 2.0888  | 1.7899  | 2.0464  | 1.9599  | 1.6012  | 2.3727  | 1.8264  | 1.7167  | 1.9426  |
| 131 | S-122_P112 P11274  | Breakpoint clustε BCR BCR1 Dε  | 0.8171  | 0.9900  | 1.1500  | 1.0247  | 0.8670  | 0.8991  | 0.7975  | 0.9518  | 0.7035  | 0.4814  |
| 132 | S-122_Q018 Q01831  | DNA repair proteε XPC XPCC     | -2.4018 | -2.5338 | -2.5518 | -2.5550 | -2.3192 | -2.3219 | -2.5103 | -2.1479 | -2.0223 | -1.9211 |
| 133 | S-122_Q5VZ Q5VZL5  | Zinc finger MYMε ZMYM4 KIAA    | -0.3162 | -0.2641 | -0.1365 | -0.1979 | -0.2728 | -0.2147 | -0.3728 | -0.3673 | -0.2050 | -0.3016 |
| 134 | S-122_Q8W' Q8WXI9  | Transcriptional rε GATAD2B KI  | -0.9226 | -0.7074 | -0.7331 | -0.8370 | -0.7403 | -0.6692 | -1.2381 | -0.9549 | -0.1579 | -0.1362 |
| 135 | S-122_Q995 Q99576  | TSC22 domain fa TSC22D3 DS     | -0.3049 | -0.0727 | 0.1472  | 0.4644  | 0.3155  | 0.2997  | 0.3438  | 0.6748  | 0.0155  | 0.3653  |
| 136 | S-1222_Q96 Q96T58  | Msx2-interacting SPEN KIAA0ε   | 0.4485  | 0.4313  | 0.6670  | 0.7191  | 0.6222  | 0.7319  | 0.3941  | 0.4639  | 0.7003  | 0.6084  |
| 137 | S-1225_Q7Z Q7Z401  | C-myc promoter- DENND4A IF     | -0.2015 | -0.0879 | -0.3881 | -0.0994 | 0.0174  | -0.2388 | -0.3846 | -0.2939 | -0.4250 | -0.4423 |
| 138 | S-1228_Q9B Q9BYW2  | Histone-lysine Nε SETD2 HIF1 I | -0.3456 | -0.1690 | -0.4397 | -0.2165 | -0.2150 | 0.0425  | -0.0967 | 0.0788  | -0.1052 | -0.2710 |
| 139 | S-124_P220: P22087 | rRNA 2'-O-methy FBL FIB1 FLR   | 0.2621  | 0.2560  | 0.2555  | 0.2716  | 1.2317  | 1.0338  | 0.8774  | 0.8012  | 0.1246  | 0.0605  |
| 140 | S-1246_Q6F Q6F5E8  | Capping protein, CARMIL2 LR    | 0.1213  | 0.0088  | 0.4755  | 0.2493  | 0.3036  | 0.5810  | 0.1884  | 0.1103  | 0.4783  | 0.5507  |
| 141 | S-125_P067: P06748 | Nucleophosmin (NPM1 NPM        | -0.8110 | -0.7011 | -0.7886 | -0.8491 | -0.8991 | -0.6829 | -0.8077 | -0.6580 | -0.4094 | -0.3358 |
| 142 | S-125_P558: P55884 | Eukaryotic transl EIF3B EIF3Sε | -4.2827 | -4.1188 | -2.7845 | -1.9911 | -2.7936 | -2.4061 | -2.5478 | -2.4818 | -2.8766 | -2.6149 |
| 143 | S-125_Q997 Q99733  | Nucleosome assε NAP1L4 NAF     | 0.1687  | 0.3424  | -0.0774 | -0.5420 | 0.0918  | -0.1487 | -0.2895 | 0.0672  | 0.3647  | 0.6695  |
| 144 | S-125_Q9GZ Q9GZT9  | Egl nine homologε EGLN1 C1orf  | 0.7913  | 0.7778  | 0.8237  | 0.6230  | 0.5785  | 0.2900  | 0.5811  | 0.3771  | 0.4652  | 0.2788  |
| 145 | S-125_Q9NC Q9NQP4  | Prefoldin subunitε PFDN4 PFD4  | 0.3821  | 0.1311  | 0.3415  | 0.2130  | 0.1226  | 0.3636  | 0.1303  | 0.2114  | 0.5279  | 0.0318  |
| 146 | S-1257_Q96 Q96BY6  | Dedicator of cytc DOCK10 KIA   | 0.9475  | 1.0479  | 0.8622  | 0.7763  | 1.4058  | 1.5232  | 1.0869  | 1.1855  | 1.4095  | 1.1386  |
| 147 | S-126_Q68D Q68DK7  | Male-specific letI MSL1 MSL1L  | -0.0590 | -0.0302 | -0.2385 | -0.0692 | -0.4166 | -0.3388 | -0.1884 | -0.3338 | -0.1814 | -0.2587 |
| 148 | S-126_Q8Nε Q8N5C8  | TGF-beta-activat TAB3 MAP3I    | -1.0742 | -1.0033 | -0.6718 | -0.7358 | -1.0439 | -0.6978 | -1.0842 | -0.5630 | -0.6495 | -0.5837 |
| 149 | S-1267_Q9B Q9BQGO  | Myb-binding pro MYBBP1A Pε     | 0.4459  | 0.1492  | 0.2494  | -0.0215 | 0.8364  | 0.7373  | 0.7025  | 0.7004  | 0.4718  | 0.0293  |
| 150 | S-1268_Q3T Q3T8J9  | GON-4-like prote GON4L GON     | -1.4406 | -1.4834 | -1.3922 | -1.4204 | -1.2129 | -1.3520 | -1.5863 | -1.4439 | -1.4391 | -1.5232 |
| 151 | S-127_Q5T8 Q5T8P6  | RNA-binding pro RBM26 C13c     | -0.1265 | -0.0961 | 0.0156  | -0.0655 | -0.3330 | -0.0453 | -0.1722 | -0.1194 | -0.0210 | -0.0578 |
| 152 | S-1272_Q56 Q562E7  | WD repeat-contε WDR81          | -0.1325 | -0.0078 | -0.1983 | 0.0053  | -0.0746 | -0.0180 | -0.0289 | -0.1926 | 0.2535  | 0.3360  |
| 153 | S-128_Q5Jε Q5JSP0  | FYVE, RhoGEF an FGD3 ZFYVE     | 0.1879  | 0.1592  | -0.5065 | -0.2670 | -0.2628 | -0.3539 | -0.5066 | -0.6159 | -0.5189 | -0.3104 |
| 154 | S-128_Q96T Q96T37  | RNA-binding pro RBM15 OTT      | 1.0260  | 1.0415  | 1.1229  | 0.8293  | 0.7828  | 1.0141  | 0.8802  | 0.9391  | 0.8948  | 0.7290  |

|     |             |           |                                        |         |         |         |         |         |         |         |         |         |         |
|-----|-------------|-----------|----------------------------------------|---------|---------|---------|---------|---------|---------|---------|---------|---------|---------|
| 155 | S-1287_Q96  | Q96T58    | Msx2-interacting SPEN KIAA0969         | 0.5209  | 0.5517  | 0.7246  | 0.5891  | 0.6670  | 0.8447  | 0.5750  | 0.6910  | 0.8392  | 0.8112  |
| 156 | S-129_O754  | O75475    | PC4 and SFRS1-ir PSIP1 DFS70           | 1.0206  | 1.1745  | 0.6664  | 1.0291  | 1.0788  | 0.7039  | 1.2800  | 0.9271  | 0.8377  | 0.8800  |
| 157 | S-129_O755  | O75533    | Splicing factor 3E SF3B1 SAP130        | -0.3782 | -0.5761 | -0.7038 | -0.8855 | -0.4897 | -0.7051 | -0.5196 | -0.4356 | -0.4875 | -0.5895 |
| 158 | S-129_Q96J  | Q96JY6    | PDZ and LIM domain PDLIM2 PP6          | -0.0422 | -0.1176 | -0.1511 | -0.3644 | -0.3682 | -0.2672 | -0.3561 | -0.1996 | -0.5452 | -0.4146 |
| 159 | S-1290_Q13  | Q13459    | Unconventional myosin MYO9B MYF        | 1.1468  | 0.7752  | 1.1181  | 0.8112  | 1.0073  | 0.8983  | 1.2816  | 1.1895  | 0.5863  | 0.2978  |
| 160 | S-1295_Q9B  | Q9BV73    | Centrosome-associated CEP250 CEP       | -0.4880 | -0.2042 | 0.1127  | 0.1502  | 0.0046  | 0.2215  | -0.0569 | -0.0185 | -0.0249 | -0.2267 |
| 161 | S-130_Q49A  | Q49A26    | Putative oxidoreductase GLYR1 HIBDI    | 0.1933  | 0.2087  | 0.4630  | 0.4826  | 1.0826  | 0.7796  | 0.6743  | 0.7414  | 0.5743  | 0.5153  |
| 162 | S-130_Q9UI  | Q9UI08    | Ena/VASP-like protein EVL RNB6         | -0.3387 | -0.5877 | -0.0785 | -0.2144 | -0.0401 | 0.2228  | -0.1591 | 0.0407  | 0.2524  | 0.1102  |
| 163 | S-1305_Q29  | Q29RF7    | Sister chromatid PDS5A KIAA0969        | 0.7007  | 0.3726  | 0.9613  | 0.8233  | 0.9485  | 0.8879  | 0.8219  | 0.9621  | 0.9850  | 0.5820  |
| 164 | S-131;154_C | Q8N450;Q8 | Coiled-coil domain CCDC82 HT0          | 1.1990  | 1.2041  | 1.3546  | 1.2790  | 1.4530  | 1.4052  | 1.2405  | 1.4206  | 1.6536  | 1.4633  |
| 165 | S-1315_Q6F  | Q6F5E8    | Capping protein, CARMIL2 LR            | 0.3081  | 0.3862  | 0.3047  | 0.1227  | 0.1741  | 0.2481  | 0.0882  | 0.0932  | 0.2912  | 0.4066  |
| 166 | S-132_O751  | O75152    | Zinc finger CCCH ZC3H11A KIAA          | -0.2415 | -0.1739 | -0.1487 | -0.4228 | -0.3874 | -0.2888 | -0.1106 | -0.3033 | -0.1711 | -0.3807 |
| 167 | S-132_P049  | P04920    | Anion exchange SLC4A2 AE2              | -2.3183 | -1.8719 | -1.8284 | -1.6412 | -1.7746 | -1.1603 | -1.4034 | -1.5428 | -2.1378 | -1.9114 |
| 168 | S-132_Q722  | Q722E3    | Aprataxin (EC 3.6.1.15) APTX AXA1      | -1.3183 | -1.5663 | -1.7279 | -1.3237 | -1.2874 | -1.7670 | -0.8626 | -1.6732 | -1.8343 | -1.6835 |
| 169 | S-132_Q8W   | Q8WVK2    | U4/U6.U5 small ribosomal SNRNP27       | -0.6687 | -0.9361 | 0.6112  | -0.0342 | 0.4816  | -0.4320 | 0.8852  | -0.0899 | -0.3602 | -0.3184 |
| 170 | S-132_Q9H9  | Q9H981    | Actin-related protein ACTR8 ARP8       | -1.3595 | -1.1260 | -0.9771 | -1.2755 | -1.0326 | -1.1973 | -1.0981 | -1.2753 | -1.4077 | -1.1362 |
| 171 | S-132_Q9Y2  | Q9Y2K6    | Ubiquitin carboxyl-terminal USP20 KIAA | -1.1932 | -1.0033 | -0.5876 | -0.3416 | -0.8064 | -0.7295 | -0.8299 | -1.0657 | -0.7730 | -0.7952 |
| 172 | S-1322_Q14  | Q14669    | E3 ubiquitin-protein TRIP12 KIAA       | -1.1524 | -1.3732 | -1.4947 | -1.3326 | -1.3377 | -1.1973 | -1.3594 | -1.2569 | -1.5720 | -1.3329 |
| 173 | S-1327_Q8N  | Q8N201    | Integrator component INTS1 KIAA1       | 0.7681  | 0.9198  | 0.0290  | 0.5386  | 0.2128  | 0.1945  | 0.5017  | 0.3219  | -0.0078 | 0.1019  |
| 174 | S-1328_P46  | P46100    | Transcription factor ATRX RAD54        | 0.1879  | -0.0565 | -0.2939 | 0.2037  | 0.3520  | 0.5314  | 0.0384  | 0.3923  | 0.2643  | 0.4173  |
| 175 | S-1328_Q13  | Q13464    | Rho-associated protein ROCK1           | -0.5265 | -0.8985 | -0.5751 | -0.3060 | -0.8556 | -0.5775 | -0.4505 | -0.7715 | -0.8766 | -0.3362 |
| 176 | S-1328_Q7Z  | Q7Z6E9    | E3 ubiquitin-protein RBBP6 P2PR        | 1.2138  | 1.1764  | 1.2690  | 0.8373  | 1.1461  | 1.1596  | 1.0136  | 0.9311  | 1.2187  | 1.0362  |
| 177 | S-133_O754  | O75494    | Serine/arginine-rich SRSF10 FUSI       | 0.4288  | 0.4492  | 0.5709  | 0.6299  | 0.9234  | 0.1971  | 1.1196  | 0.4782  | 0.3248  | 0.6384  |
| 178 | S-133_P296  | P29692    | Elongation factor EEF1D EF1D           | 0.3877  | 0.4908  | -0.4425 | -0.4861 | -0.0961 | -0.6574 | -0.0355 | -0.3338 | -0.4146 | -0.1013 |
| 179 | S-133_Q6NY  | Q6NYC8    | Phostensin (Protein PPP1R18 HK         | 1.7970  | 1.9858  | 1.6515  | 1.4773  | 1.6017  | 1.2481  | 1.8703  | 1.5214  | 1.2270  | 1.1333  |
| 180 | S-133_Q8NE  | Q8NEY8    | Periphilin-1 (CDC PPHLN1 HSP           | 0.3936  | 0.3425  | 0.0878  | 0.2251  | -0.0085 | 0.0843  | 0.2559  | 0.0302  | 0.0849  | 0.1154  |
| 181 | S-1334_Q9N  | Q9NTI5    | Sister chromatid PDS5B APRII           | -0.8297 | -1.1116 | -1.0841 | -0.7718 | -1.0176 | -0.6457 | -0.9377 | -0.8658 | -0.9351 | -1.0834 |
| 182 | S-134_Q9UC  | Q9UGY1    | Nucleolar protein NOL12                | -0.6658 | -0.6489 | -0.6536 | -0.7036 | -0.7281 | -0.7394 | -0.7339 | -0.8911 | -0.8553 | -0.6447 |
| 183 | S-1341_Q13  | Q13464    | Rho-associated protein ROCK1           | 0.2115  | 0.2808  | 1.3559  | 1.2198  | 1.3841  | 0.5478  | 1.4795  | 1.0008  | 0.5485  | 0.1185  |
| 184 | S-1342_Q9U  | Q9UIG0    | Tyrosine-protein BAZ1B WBSO            | 1.6613  | 1.7032  | 1.0947  | 1.5915  | 1.9297  | 1.4907  | 1.6393  | 1.7567  | 0.1353  | 0.1197  |
| 185 | S-135_Q9UK  | Q9UKM9    | RNA-binding protein RALY HNRPC         | -1.5199 | -1.7365 | -2.0995 | -2.2138 | -2.4156 | -2.1724 | -1.9990 | -2.2731 | -2.3760 | -2.4880 |
| 186 | S-1350_Q13  | Q13428    | Treacle protein (TCOF1                 | 0.1751  | 0.0802  | 0.0967  | 0.2972  | 0.3330  | 0.3546  | 0.4109  | 0.3584  | -0.2203 | 0.0353  |
| 187 | S-1358_Q9N  | Q9NTI5    | Sister chromatid PDS5B APRII           | 0.0029  | -0.1384 | 0.5526  | 0.4195  | 0.4836  | 0.5924  | 0.6907  | 0.4998  | 0.5127  | 0.8348  |
| 188 | S-136_Q024  | Q02446    | Transcription factor SP4               | 0.7881  | 0.8618  | 0.2092  | 0.3822  | 0.0228  | 0.3831  | 0.0257  | 0.4166  | -0.1249 | -0.4423 |
| 189 | S-136_Q144  | Q14498    | RNA-binding protein RBM39 HCC          | 0.1312  | 0.3160  | -0.1552 | 0.1316  | -0.1921 | 0.0745  | -0.1783 | 0.1640  | -0.0124 | -0.2129 |
| 190 | S-136_Q8IV  | Q8IV63    | Inactive serine/threonine VPK3         | 0.2424  | 0.2799  | 0.1594  | 0.4119  | 0.3534  | 0.2543  | 0.3792  | 0.3414  | 0.3957  | 0.2724  |
| 191 | S-136_Q8N9  | Q8N9T8    | Protein KRI1 homolog KRI1              | 0.3670  | 0.2907  | 0.5197  | 0.2164  | -0.1224 | -0.0309 | -0.0420 | -0.0990 | -0.4878 | -0.4317 |
| 192 | S-136_Q8TB  | Q8TB72    | Pumilio homolog PUM2 KIAAC             | 0.5529  | 0.4150  | 0.3377  | 0.2000  | 0.2357  | 0.1988  | 0.2756  | 0.1244  | 0.2013  | -0.0848 |
| 193 | S-137_O608  | O60841    | Eukaryotic translation EIF5B IF2 KIA   | -0.4430 | -0.3114 | -0.0697 | -0.2021 | 0.2395  | 0.2266  | 0.0359  | 0.0599  | 0.2556  | 0.0179  |



|     |            |        |                    |             |         |         |         |         |         |         |         |         |         |         |
|-----|------------|--------|--------------------|-------------|---------|---------|---------|---------|---------|---------|---------|---------|---------|---------|
| 194 | S-137_Q005 | Q00537 | Cyclin-dependen    | CDK17 PCTA  | 1.0945  | 0.8072  | 1.0234  | 0.7752  | 1.1911  | 1.2450  | 1.2470  | 1.1251  | 1.0568  | 0.5392  |
| 195 | S-137_Q929 | Q92974 | Rho guanine nuc    | ARHGFE2 KL  | -2.7454 | -2.7930 | -2.6536 | -2.5975 | -2.2739 | -2.8344 | -2.7867 | -2.5607 | -2.4497 | -2.8268 |
| 196 | S-1370_A6N | A6NC98 | Coiled-coil doma   | CCDC88B BR  | -0.4357 | -0.6594 | -0.5095 | -0.8181 | -0.7039 | -0.4706 | -0.3611 | -0.2551 | -0.6930 | -0.6670 |
| 197 | S-1375_Q02 | Q02880 | DNA topoisomer     | TOP2B       | -0.1812 | -0.2082 | -0.7350 | -0.5847 | -0.6993 | -0.7235 | -0.5202 | -0.7535 | -0.8045 | -0.7604 |
| 198 | S-1378_Q13 | Q13428 | Treacle protein (  | TCOF1       | 1.3577  | 1.4260  | 0.8581  | 1.0483  | 0.3521  | 0.8116  | 0.9000  | 0.9616  | 0.3234  | 0.3756  |
| 199 | S-138_O756 | O75683 | Surfeit locus pro  | SURF6 SURF  | -0.9573 | -0.6699 | -1.2165 | -1.1128 | -0.9378 | -1.4542 | -0.9155 | -1.1278 | -1.2172 | -1.1706 |
| 200 | S-138_O959 | O95999 | B-cell lymphoma    | BCL10 CIPER | -0.6919 | -1.0370 | -0.0105 | 0.2964  | 0.1428  | 0.0894  | 0.1160  | 0.1508  | -0.2052 | -0.0985 |
| 201 | S-138_Q5VT | Q5VTR2 | E3 ubiquitin-prot  | RNF20 BRE1  | 0.5372  | 0.7144  | -0.2635 | 0.0813  | -0.2366 | -0.1454 | -0.2597 | -0.2424 | -0.2949 | -0.4635 |
| 202 | S-138_Q96C | Q96C57 | Protein CUSTOS     | CUSTOS C12  | -0.2015 | -0.6507 | 2.2283  | 2.3992  | 1.9745  | 2.1890  | 2.3219  | 2.3090  | 1.8690  | 2.0459  |
| 203 | S-138_Q9HA | Q9HAZ1 | Dual specificity p | CLK4        | -1.1444 | -1.2183 | -1.1971 | -1.4444 | -1.0213 | -1.0826 | -1.0302 | -1.1996 | -1.0409 | -0.9834 |
| 204 | S-1381_Q6F | Q6F5E8 | Capping protein,   | CARMIL2 LR  | 0.7118  | 0.5816  | 0.6802  | 0.6242  | 0.6330  | 0.7102  | 0.5802  | 0.6022  | 0.7297  | 0.5015  |
| 205 | S-1387_Q7Z | Q7Z591 | Microtubule org;   | AKNA KIAA1  | 0.1799  | 0.5920  | 1.0347  | 1.0558  | 1.0953  | 0.9752  | 0.8936  | 0.9028  | 0.6655  | 1.0512  |
| 206 | S-139_P497 | P49736 | DNA replication I  | MCM2 BM2    | 0.2437  | 0.2196  | 0.1112  | -0.0624 | -0.4759 | -0.4707 | -0.0119 | -0.2625 | 0.0715  | -0.0978 |
| 207 | S-139_Q6NY | Q6NYC8 | Phostensin (Prot   | PPP1R18 HK  | -0.1973 | -0.6334 | 0.4543  | 0.4644  | 0.3735  | 0.3612  | 0.5863  | 0.5352  | 0.0883  | -0.0155 |
| 208 | S-139_Q9Y2 | Q9Y266 | Nuclear migratio   | NUDC        | -0.2161 | -0.1615 | -0.6098 | -0.3828 | -0.6567 | -0.1372 | -0.4224 | -0.2209 | -0.2806 | -0.4564 |
| 209 | S-1395_Q7Z | Q7Z6Z7 | E3 ubiquitin-prot  | HUWE1 KIA   | -1.2224 | -1.2209 | -1.4684 | -1.6863 | -1.5970 | -1.6787 | -1.6258 | -1.7077 | -1.4820 | -1.1193 |
| 210 | S-14_P5158 | P51580 | Thiopurine S-me    | TPMT        | 0.7628  | 0.8527  | 0.7811  | 0.8132  | 0.3287  | 0.6222  | 0.4456  | 0.5140  | 0.7722  | 0.2978  |
| 211 | S-14_Q9H6Y | Q9H6Y2 | WD repeat-cont     | WDR55       | -0.8831 | -0.9160 | -1.7092 | -2.3161 | -2.0681 | -1.8641 | -2.0534 | -1.8141 | -1.3254 | -1.6605 |
| 212 | S-140_P161 | P16104 | Histone H2AX (H    | H2AX H2AF   | 0.0162  | 0.3257  | 0.9170  | 1.7695  | 1.6843  | 0.9654  | 1.8492  | 1.9203  | 0.4997  | 0.8751  |
| 213 | S-140_P497 | P49759 | Dual specificity p | CLK1 CLK    | -1.2224 | -1.3060 | -1.5673 | -1.3016 | -1.1462 | -1.4706 | -1.5066 | -1.4397 | -1.3669 | -1.7212 |
| 214 | S-140_Q8NE | Q8NE71 | ATP-binding cass   | ABCF1 ABC5  | 0.8203  | 0.5309  | 0.7419  | 0.6700  | 0.8394  | 1.0080  | 0.7451  | 0.8790  | 0.7851  | 0.7123  |
| 215 | S-1400_Q02 | Q02880 | DNA topoisomer     | TOP2B       | 0.7283  | 0.8782  | 0.3571  | 0.4292  | 0.3462  | 0.5034  | 0.5172  | 0.3677  | 0.6440  | 0.4823  |
| 216 | S-1401_P21 | P21359 | Neurofibromin (I   | NF1         | -0.4162 | -0.7092 | 1.3369  | 0.4463  | 1.4836  | 0.2556  | 1.4579  | 0.7854  | 0.5983  | 0.1766  |
| 217 | S-1404_Q9U | Q9UQ35 | Serine/arginine r  | SRRM2 KIAA  | 0.5421  | 0.2836  | 0.7689  | 0.3958  | 0.5599  | 0.6193  | 0.5432  | 0.5603  | 0.5845  | 0.6368  |
| 218 | S-141_P188 | P18858 | DNA ligase 1 (EC   | LIG1        | -0.0403 | -0.2081 | 0.3063  | -0.1147 | 0.0780  | 0.0554  | -0.0624 | 0.1032  | 0.4802  | 0.2799  |
| 219 | S-1410_Q9N | Q9NQ78 | Kinesin-like prot  | KIF13B GAKI | -0.3183 | -0.2695 | -0.0708 | 0.0317  | -0.3169 | -0.3182 | -0.4189 | -0.3968 | -0.5547 | -0.3216 |
| 220 | S-1413_Q02 | Q02880 | DNA topoisomer     | TOP2B       | 0.2084  | 0.2652  | 0.2414  | 0.1518  | 0.1394  | 0.0583  | 0.0783  | 0.0422  | 0.1944  | 0.2037  |
| 221 | S-1413_Q9N | Q9NRL2 | Bromodomain ac     | BAZ1A ACF1  | -0.2509 | -0.1309 | -0.4764 | -0.3420 | -0.4848 | -0.2639 | -0.0983 | -0.4226 | -0.6706 | -0.4806 |
| 222 | S-1413_Q9N | Q9NZM4 | BRD4-interacting   | BICRA GLTSC | -0.1645 | 0.0242  | -0.0211 | -0.1109 | -0.2193 | -0.1388 | -0.0705 | 0.0831  | -0.0249 | 0.1019  |
| 223 | S-142_P162 | P16220 | Cyclic AMP-respc   | CREB1       | 0.2756  | 0.2504  | -0.3475 | -0.3215 | -0.4794 | -0.2162 | 0.0168  | -0.1244 | -0.3271 | -0.1447 |
| 224 | S-142_Q5SS | Q5SSJ5 | Heterochromatir    | HP1BP3      | -2.3829 | -2.2183 | -1.9206 | -2.1637 | -2.1300 | -2.2145 | -2.0091 | -2.0498 | -2.2447 | -1.8826 |
| 225 | S-142_Q927 | Q92785 | Zinc finger protei | DPF2 BAF45  | -0.3229 | -0.2127 | -0.3493 | -0.2915 | -0.3844 | -0.3666 | -0.2645 | -0.4131 | -0.3519 | -0.2389 |
| 226 | S-143_P352 | P35236 | Tyrosine-protein   | PTPN7       | -0.8921 | -1.2496 | -0.5565 | -0.8244 | -0.3192 | -0.2816 | -0.0502 | -0.2865 | -0.9080 | -0.8132 |
| 227 | S-143_Q5JT | Q5JTV8 | Torsin-1A-intera   | TOR1AIP1 L  | -0.1128 | 0.0932  | -0.0785 | 0.0930  | 0.5760  | 0.9715  | 0.8696  | 0.6242  | 0.1053  | 0.2171  |
| 228 | S-143_Q8NE | Q8NDX1 | PH and SEC7 don    | PSD4 EFA6B  | 1.0269  | 1.1915  | 0.8686  | 0.9410  | 0.7710  | 1.0768  | 0.8922  | 0.8697  | 0.5845  | 0.6016  |
| 229 | S-144_Q135 | Q13523 | Serine/threonine   | PRPF4B KIA  | -0.7274 | -0.6472 | -0.3812 | -0.1858 | -1.0785 | -0.9134 | -1.0013 | -1.0216 | -0.4893 | -0.3674 |
| 230 | S-144_Q96K | Q96K21 | Abscission/NoCu    | ZFYVE19 AN  | 0.3931  | 0.2649  | 0.6029  | 0.5560  | 0.3352  | 0.5004  | 0.1872  | 0.1838  | 0.5009  | 0.4717  |
| 231 | S-144_Q9H1 | Q9H1E3 | Nuclear ubiquito   | NUCKS1 NU   | -0.2488 | -0.4155 | -0.7155 | -1.0144 | -0.4671 | -0.4635 | -0.7161 | -0.7073 | -0.1487 | -0.1837 |
| 232 | S-1448_Q14 | Q14160 | Protein scribble I | SCRIB CRIB1 | -0.3618 | -0.3294 | -0.3185 | -0.2394 | -0.2366 | -0.3350 | -0.5746 | -0.2939 | -0.6252 | -0.5607 |

|     |             |        |                                |         |         |         |         |         |         |         |         |         |         |         |
|-----|-------------|--------|--------------------------------|---------|---------|---------|---------|---------|---------|---------|---------|---------|---------|---------|
| 233 | S-1453_Q86  | Q86U86 | Protein polybron PBRM1 BAF     | -3.0857 | -3.1979 | -3.0796 | -2.4252 | -2.9844 | -2.8344 | -2.6419 | -3.2827 | -3.3469 | -3.3891 |         |
| 234 | S-1459_P21  | P21333 | Filamin-A (FLN-A FLNA FLN FL   | 0.3404  | 0.3057  | 0.4722  | 0.3825  | 0.2824  | 0.4079  | 0.1801  | 0.3702  | 0.4761  | 0.5730  |         |
| 235 | S-146_O603  | O60307 | Microtubule-assoc MAST3 KIAA   | 1.0144  | 1.1077  | 0.8547  | 0.9722  | 0.9370  | 1.2784  | 1.2827  | 1.2760  | 0.9101  | 0.6475  |         |
| 236 | S-146_Q134  | Q13404 | Ubiquitin-conjug UBE2V1 CRC    | -1.2394 | -1.0279 | -1.3977 | -1.3461 | -1.5970 | -1.1372 | -1.1988 | -1.2939 | -1.3803 | -1.5721 |         |
| 237 | S-146_Q148  | Q14847 | LIM and SH3 don LASP1 MLN5     | -0.4177 | -0.3978 | -0.4440 | -0.6083 | -0.3553 | -0.3788 | -0.3462 | -0.3818 | -0.4782 | -0.2141 |         |
| 238 | S-146_Q96A  | Q96AT1 | Uncharacterized KIAA1143       | -2.2652 | -2.7110 | -0.6034 | -1.9562 | -0.8995 | -2.2708 | -1.0144 | -2.1547 | -1.6272 | -2.1419 |         |
| 239 | S-1461_Q13  | Q13576 | Ras GTPase-activ IQGAP2        | -0.4042 | -0.2708 | 0.7416  | -0.1597 | 0.4030  | -0.7797 | 0.3530  | -0.1513 | -0.7335 | -0.6387 |         |
| 240 | S-1468_Q9U  | Q9UIG0 | Tyrosine-protein BAZ1B WBS(C   | 0.2146  | 0.0000  | 0.1688  | -0.0805 | -0.1159 | 0.0697  | -0.0597 | -0.1547 | -0.3803 | -0.1362 |         |
| 241 | S-147_Q8IZI | Q8IZD4 | mRNA-decapping DCP1B           | 0.6312  | 0.8569  | 0.5410  | 0.5483  | 0.6222  | 0.8380  | 0.4934  | 0.6863  | 0.3597  | 0.4544  |         |
| 242 | S-147_Q8W   | Q8WW12 | PEST proteolytic PCNP          | -1.1767 | -0.8478 | 0.4045  | -0.2499 | -0.1482 | -1.0985 | 0.2333  | -0.6276 | -0.7730 | -0.9334 |         |
| 243 | S-1475_Q14  | Q14160 | Protein scribble I SCRIB CRIB1 | -0.9260 | -1.1903 | -0.9285 | -0.6607 | -0.8927 | -0.7197 | -0.8579 | -0.8437 | -1.1066 | -0.9758 |         |
| 244 | S-148_O152  | O15234 | Protein CASC3 (C CASC3 MLN5    | -0.2650 | -0.1792 | -0.0871 | -0.0099 | -0.0350 | 0.0391  | -0.2011 | -0.2272 | 0.0362  | 0.0123  |         |
| 245 | S-149_Q132  | Q13283 | Ras GTPase-activ G3BP1 G3BP    | -1.3004 | -1.0950 | -1.5549 | -1.7447 | -1.8064 | -1.9106 | -1.5941 | -2.4733 | -1.7444 | -1.8638 |         |
| 246 | S-149_Q6UE  | Q6UB98 | Ankyrin repeat d ANKRD12 AF    | -0.0609 | 0.0209  | 0.2581  | 0.0018  | -0.1320 | 0.0838  | 0.0942  | 0.0759  | -0.2037 | -0.1866 |         |
| 247 | S-149_Q8IVI | Q8IVM7 | Deleted.                       | 0       | -2.0255 | -2.2132 | -2.0360 | -2.3968 | -2.1544 | -2.1670 | -2.1751 | -1.8658 | -2.3141 | -2.6070 |
| 248 | S-149_Q8N5  | Q8N5F7 | NF-kappa-B-activ NKAP          | 0.4865  | 0.2671  | -0.7227 | -0.1657 | -0.0611 | -0.6834 | 0.4069  | -0.7052 | -0.6292 | -0.3857 |         |
| 249 | S-1494_Q00  | Q00610 | Clathrin heavy ch CLTC CLH17   | -0.3548 | -0.1357 | -0.8434 | -0.8307 | -0.9133 | -0.8029 | -0.6893 | -0.8968 | -1.0761 | -0.9910 |         |
| 250 | S-1499_Q9U  | Q9UQ35 | Serine/arginine r SRRM2 KIAA   | 0.7744  | 0.8950  | 1.1692  | 1.1574  | 1.1436  | 1.0640  | 0.8445  | 1.0569  | 1.0065  | 1.1368  |         |
| 251 | S-150_P062  | P06239 | Tyrosine-protein LCK           | 1.2816  | 1.1646  | 0.6964  | 0.5820  | 0.8208  | 0.7020  | 1.0097  | 0.6758  | 0.5966  | 0.6776  |         |
| 252 | S-150_Q6ZS  | Q6ZSZ5 | Rho guanine nuc ARHGEF18 K     | -0.5213 | -0.7384 | -0.5457 | -0.7809 | -0.5749 | -0.3016 | -0.6706 | -0.6042 | -0.5395 | -0.6752 |         |
| 253 | S-1507_P51I | P51610 | Host cell factor 1 HCFC1 HCF1  | -1.0515 | -1.4742 | -1.2361 | -1.0861 | -1.3564 | -1.3406 | -1.3661 | -1.0185 | -1.2293 | -1.0090 |         |
| 254 | S-151_P404  | P40425 | Pre-B-cell leuken PBX2 G17     | -0.8622 | -0.8438 | -0.9506 | -0.4252 | -1.0477 | -1.0858 | -1.0382 | -1.1650 | -0.8296 | -0.8154 |         |
| 255 | S-151_Q96S  | Q96S55 | ATPase WRNIP1 WRNIP1 WH        | -0.8105 | -1.1878 | -0.0382 | -0.3038 | 0.0391  | -0.7148 | -0.0489 | -0.6205 | -0.1579 | 0.1709  |         |
| 256 | S-1510_Q8V  | Q8WWI1 | LIM domain only LMO7 FBX2(C    | -0.8426 | -0.7440 | -0.2824 | -0.6806 | 0.1411  | -0.4200 | -0.2488 | -0.3454 | 0.0104  | -0.2087 |         |
| 257 | S-152_P185I | P18583 | Protein SON (Bax SON C21orf5   | -0.3479 | -0.4213 | -0.1053 | -0.1498 | -0.2784 | -0.0890 | -0.0302 | -0.0964 | -0.0476 | -0.0551 |         |
| 258 | S-152_Q7L2  | Q7L2J0 | 7SK snRNA meth MEPCE BCDI      | -0.9631 | -1.2506 | -0.1719 | -0.4634 | 0.2562  | 0.0514  | -0.1140 | 0.1927  | 0.1901  | -0.2080 |         |
| 259 | S-152_Q9UII | Q9UI08 | Ena/VASP-like pr EVL RNB6      | -1.9749 | -2.4169 | -1.4713 | -1.7186 | -1.7129 | -1.8238 | -1.1634 | -1.6538 | -1.5151 | -1.8498 |         |
| 260 | S-1523_Q5S  | Q5SRE5 | Nucleoporin NUF NUP188 KIA     | -0.2287 | -0.2158 | -0.2140 | -0.1283 | -0.6365 | -0.0499 | -0.0911 | -0.2049 | -0.4181 | -0.5875 |         |
| 261 | S-1528_P51I | P51531 | Probable global t SMARCA2 B    | -0.2245 | 0.0586  | -0.5230 | -0.0378 | -0.5558 | 0.7898  | -0.3379 | -0.0882 | -0.3029 | -0.2464 |         |
| 262 | S-153_O952  | O95218 | Zinc finger Ran-b ZRANB2 ZIS   | 0.8863  | 0.9794  | 0.3072  | 0.5974  | 0.3462  | 0.1321  | 0.5343  | 0.1159  | 0.2069  | 0.3411  |         |
| 263 | S-153_Q166  | Q16666 | Gamma-interferon IFI16 IFNGIP  | 0.9457  | 0.8410  | 0.6558  | 0.2022  | 0.5334  | 0.5201  | 0.5837  | 0.7594  | 0.4774  | 0.7444  |         |
| 264 | S-153_Q8N2  | Q8N2F6 | Armadillo repeat ARMDC10 SVI   | -0.9123 | -0.6078 | -0.6569 | -0.3170 | -0.4717 | -0.4340 | -0.6118 | -0.5652 | -1.0329 | -0.9163 |         |
| 265 | S-153_Q96S  | Q96S55 | ATPase WRNIP1 WRNIP1 WH        | 0.4164  | 0.4557  | 0.1079  | 0.4384  | 0.2159  | 0.2406  | 0.5298  | 0.3605  | 0.2600  | 0.3248  |         |
| 266 | S-153_Q9NY  | Q9NYF8 | Bcl-2-associated BCLAF1 BTF    | 1.4225  | 1.3640  | 1.6909  | 1.5176  | 1.3331  | 1.4516  | 1.5076  | 1.5556  | 1.8597  | 1.7711  |         |
| 267 | S-1535_Q14  | Q14839 | Chromodomain-l CHD4            | 1.2736  | 1.1369  | 0.8676  | 0.7269  | 0.9592  | 0.8993  | 0.9029  | 0.8981  | 0.7640  | 0.5803  |         |
| 268 | S-1537_Q9U  | Q9UQ35 | Serine/arginine r SRRM2 KIAA   | -4.3548 | -3.1382 | -2.1064 | -2.8056 | -2.6949 | -2.1537 | -2.8509 | -2.8492 | -1.9252 | -1.9457 |         |
| 269 | S-154_Q8N4  | Q8N4S0 | Coiled-coil doma CCDC82 HT0    | 1.9129  | 1.8860  | 2.1272  | 1.9708  | 2.3140  | 2.2615  | 2.1362  | 2.0422  | 2.0987  | 2.0883  |         |
| 270 | S-155_Q8TB  | Q8TBF4 | Zinc finger CCHC ZCRB1         | -2.0478 | -2.0393 | -2.3146 | -2.5138 | -2.2129 | -2.4380 | -2.0953 | -2.8603 | -2.6312 | -1.9961 |         |
| 271 | S-155_Q96I  | Q96I25 | Splicing factor 45 RBM17 SPF4  | -1.3260 | -1.3138 | -1.0559 | -1.0392 | -1.1374 | -0.9962 | -1.0707 | -0.9496 | -1.0668 | -1.2884 |         |

|     |            |        |                                 |         |         |         |         |         |         |         |         |         |         |
|-----|------------|--------|---------------------------------|---------|---------|---------|---------|---------|---------|---------|---------|---------|---------|
| 272 | S-1552_Q02 | Q02880 | DNA topoisomer TOP2B            | 0.3169  | 0.1108  | 0.1050  | 0.3685  | 0.3331  | 0.2692  | 0.2768  | 0.4039  | 0.0486  | -0.1851 |
| 273 | S-1565_Q12 | Q12802 | A-kinase anchor AKAP13 BRX      | 0.2867  | 0.4921  | 0.0999  | 0.2084  | 0.4842  | 0.2649  | 0.4689  | 0.1759  | -0.1308 | -0.3322 |
| 274 | S-1568_Q9Y | Q9Y520 | Protein PRRC2C ( PRRC2C BAT     | -2.1484 | -2.1627 | -1.9245 | -2.0861 | -1.7936 | -2.2284 | -1.4559 | -1.8547 | -2.0276 | -2.1082 |
| 275 | S-157_O754 | O75420 | GRB10-interactir GIGYF1 CDS     | -0.8787 | -0.7477 | -0.3502 | -0.3735 | -0.1959 | -0.4340 | -0.2753 | -0.3474 | -0.8483 | -0.7577 |
| 276 | S-157_P103 | P10398 | Serine/threonine ARAF ARAF1     | -0.0704 | -0.1777 | -0.0919 | 0.1112  | -0.1401 | 0.0654  | -0.0705 | -0.0325 | -0.0557 | -0.1292 |
| 277 | S-157_P234 | P23497 | Nuclear autoanti SP100          | 0.1607  | 0.1230  | -0.1337 | -0.0899 | -0.2108 | -0.4706 | -0.2784 | -0.5428 | -0.2965 | 0.0406  |
| 278 | S-157_Q927 | Q92733 | Proline-rich prot PRCC TPRC     | 0.9652  | 1.1983  | 1.0016  | 0.8333  | 0.8114  | 0.8571  | 0.6422  | 0.7951  | 1.1162  | 0.9845  |
| 279 | S-157_Q96S | Q96S22 | Protein IWS1 hor IWS1 IWS1L     | 0.6658  | 0.6601  | 0.6023  | 0.6009  | 0.6054  | 0.6251  | 0.3911  | 0.8195  | 0.6163  | 0.4298  |
| 280 | S-1579_Q69 | Q69YN4 | Protein virilizer h VIRMA KIAA  | 0.3612  | 0.2551  | 1.1557  | 0.8804  | 0.9312  | 1.1402  | 0.8845  | 1.0377  | 1.3561  | 1.1368  |
| 281 | S-158_O754 | O75494 | Serine/arginine-r SRSF10 FUSI   | -1.6179 | -1.2549 | -0.8834 | -0.9562 | -0.8723 | -0.8912 | -0.9935 | -1.0000 | -0.9178 | -1.1533 |
| 282 | S-1581_Q02 | Q02880 | DNA topoisomer TOP2B            | 0.2546  | 0.1983  | 0.3693  | 0.0575  | 0.0780  | 0.3967  | 0.1850  | 0.2220  | 0.1956  | 0.2756  |
| 283 | S-159_O757 | O75791 | GRB2-related ad GRAP2 GAD       | -3.2309 | -3.6334 | -3.6470 | -3.0937 | -2.9699 | -3.6181 | -3.3232 | -3.5428 | -3.6556 | -3.4027 |
| 284 | S-1590_Q8T | Q8TEU7 | Rap guanine nuc RAPGEF6 PD      | -1.1726 | -1.1021 | -0.9087 | -0.9876 | -1.2829 | -1.1209 | -1.2975 | -1.2316 | -0.9602 | -0.9334 |
| 285 | S-1592_Q92 | Q92608 | Dedicator of cytc DOCK2 KIAA    | -1.5475 | -1.6507 | -1.9127 | -1.7387 | -1.0902 | -2.1405 | -1.7645 | -1.7899 | -1.8296 | -2.1648 |
| 286 | S-1596_Q04 | Q04637 | Eukaryotic transl EIF4G1 EIF4I  | 0.1671  | 0.0607  | -0.0084 | 0.2642  | 0.2519  | 0.4012  | 0.4971  | 0.1968  | -0.4893 | -0.3774 |
| 287 | S-16_Q1320 | Q13200 | 26S proteasome PSMD2 TRAI       | 1.6330  | 1.6015  | 1.7559  | 1.5879  | 1.4823  | 1.6226  | 1.6559  | 1.7973  | 1.7402  | 1.3703  |
| 288 | S-16_Q9BVC | Q9BVG9 | Phosphatidylseri PTDSS2 PSS2    | 0.2037  | 0.1896  | 0.1510  | 0.0846  | -0.3169 | 0.0207  | 0.0685  | -0.0817 | -0.4181 | -0.4670 |
| 289 | S-16_Q9Y5B | Q9Y5B6 | PAX3- and PAX7- PAXBP1 C21      | -0.4829 | 0.4206  | 0.6834  | 0.1944  | 0.5410  | 0.4080  | 0.6743  | 0.6986  | 0.9490  | 1.2412  |
| 290 | S-160_O602 | O60231 | Pre-mRNA-splicir DHX16 DBP2     | 1.1090  | 1.0436  | 0.5553  | 0.6331  | 0.6283  | 0.4119  | 0.6570  | 0.5249  | 0.4814  | 0.4521  |
| 291 | S-160_O754 | O75494 | Serine/arginine-r SRSF10 FUSI   | -1.9892 | -1.3197 | -1.1686 | -0.7269 | -0.9449 | -1.1871 | -0.8002 | -0.7689 | -1.2885 | -0.7686 |
| 292 | S-160_Q8N5 | Q8N554 | Zinc finger protei ZNF276 CEN   | -1.7699 | -1.6197 | -1.3731 | -1.0786 | -1.2301 | -1.4300 | -1.5364 | -1.3435 | -1.4042 | -1.2058 |
| 293 | S-161_Q1KN | Q1KMD3 | Heterogeneous r HNRNPUL2 I      | 0.3183  | 0.6146  | 0.0104  | 0.3985  | 0.0210  | 0.0015  | 0.1712  | 0.1699  | -0.4129 | -0.0834 |
| 294 | S-161_Q68D | Q68DK7 | Male-specific letl MSL1 MSL1L   | -1.7095 | -1.6858 | -1.4655 | -1.4886 | -1.5053 | -1.5954 | -1.6582 | -1.4818 | -1.7487 | -1.4511 |
| 295 | S-161_Q9H1 | Q9H147 | Deoxynucleotidy DNTTIP1 C2C     | 1.6359  | 1.6848  | 1.3563  | 1.4696  | 1.0718  | 1.1422  | 1.2623  | 1.3546  | 1.1216  | 0.9104  |
| 296 | S-1619_Q9U | Q9UKA4 | A-kinase anchor AKAP11 AKA      | 0.3385  | 0.3701  | -0.0211 | 0.4619  | 0.3606  | 0.5488  | 0.2043  | 0.1834  | 0.0536  | -0.0985 |
| 297 | S-162_P296 | P29692 | Elongation facto EEF1D EF1D     | -0.6589 | 0.1332  | -0.2990 | 0.0000  | -0.6376 | -0.0515 | -0.4847 | -0.3051 | -0.1993 | -0.2757 |
| 298 | S-164_O150 | O15027 | Protein transpor SEC16A KIAA    | -1.0648 | -1.3652 | 0.4894  | 0.6323  | 0.4494  | 0.4418  | 0.7362  | 0.5383  | 0.3722  | 0.7398  |
| 299 | S-164_O608 | O60841 | Eukaryotic transl EIF5B IF2 KIA | 1.1419  | 0.9596  | 1.3135  | 1.2731  | 1.2112  | 1.2431  | 1.2827  | 1.3041  | 0.9389  | 0.8149  |
| 300 | S-164_P506 | P50613 | Cyclin-dependen CDK7 CAK C      | 1.8223  | 1.7781  | 1.0918  | 1.3116  | 0.9551  | 0.8652  | 1.0097  | 0.8781  | 0.9490  | 0.8068  |
| 301 | S-164_Q9UF | Q9UFW8 | CGG triplet repe CGGBP1 CGC     | -1.1206 | -1.0902 | 1.3118  | -0.2144 | 0.3592  | -1.2042 | 0.1896  | -1.1378 | -0.2571 | -0.2914 |
| 302 | S-1644_Q9N | Q9NQT8 | Kinesin-like prot KIF13B GAKI   | -0.6290 | -0.8359 | -1.2609 | -1.2373 | -1.0863 | -0.9078 | -1.2018 | -0.9878 | -1.1349 | -1.1939 |
| 303 | S-165_P518 | P51858 | Hepatoma-deriv HDGF HMG1        | 0.8656  | 1.0649  | 1.0487  | 0.9433  | 0.6924  | 0.7475  | 0.6852  | 0.9167  | 1.0955  | 0.9297  |
| 304 | S-165_Q8IW | Q8IWW6 | Rho GTPase-acti ARHGAP12        | 0.5397  | 0.7332  | -0.1395 | 0.0745  | 0.2032  | 0.0739  | 0.4484  | 0.1453  | -0.3974 | -0.4009 |
| 305 | S-165_Q96B | Q96B97 | SH3 domain-coni SH3KBP1 CIM     | -0.6402 | -0.4696 | -0.1269 | -0.5894 | -0.3493 | -0.3905 | -0.1318 | -0.3729 | -0.3837 | -0.2252 |
| 306 | S-165_Q96G | Q96G03 | Phosphoglucomu PGM2 MSTP        | 1.0099  | 1.2940  | 0.0423  | 0.1454  | 0.1428  | 0.3320  | 0.3377  | 0.1089  | 0.3206  | 0.3950  |
| 307 | S-165_Q96J | Q96JC9 | ELL-associated fa EAF1          | 0.1831  | -0.0189 | 0.2476  | 0.1851  | -0.0844 | 0.1212  | 0.0232  | -0.0689 | 0.1090  | 0.1374  |
| 308 | S-165_Q9Y3 | Q9Y3Q8 | TSC22 domain fa TSC22D4 TH      | -0.9964 | -0.5243 | -1.5704 | -0.8822 | -1.9991 | -0.9970 | -1.4276 | -1.3166 | -1.0543 | -0.9532 |
| 309 | S-166_O603 | O60341 | Lysine-specific hi KDM1A AOF    | -0.6745 | -0.4498 | -0.3094 | -0.3461 | -0.6831 | -0.4563 | -0.7667 | -0.7952 | -0.1378 | -0.0471 |
| 310 | S-166_Q9NC | Q9NQG5 | Regulation of nu RPRD1B C2O     | -2.0478 | -1.9989 | -1.6903 | -2.0488 | -1.5423 | -1.3071 | -1.4452 | -1.5972 | -1.3370 | -1.2177 |

|     |                   |                                 |         |         |         |         |         |         |         |         |         |         |
|-----|-------------------|---------------------------------|---------|---------|---------|---------|---------|---------|---------|---------|---------|---------|
| 311 | S-1663_Q7Z Q7Z333 | Probable helicase SETX ALS4 K   | -1.0255 | -1.1212 | -0.9506 | -0.9562 | -1.0251 | -1.0858 | -0.8555 | -0.7304 | -1.0816 | -0.9961 |
| 312 | S-167_P538 P53805 | Calcipressin-1 (A) RCAN1 ADAI   | -0.8361 | -1.0302 | -0.1121 | -0.6978 | -0.0157 | -0.4200 | -0.1361 | -0.5120 | -0.3304 | -0.5012 |
| 313 | S-168_Q014 Q01433 | AMP deaminase AMPD2             | -0.1167 | -0.5978 | 1.4830  | 1.0447  | 1.3309  | 0.6017  | 1.1975  | 0.9589  | 1.2298  | 0.8410  |
| 314 | S-168_Q146 Q14676 | Mediator of DNA MDC1 KIAAC      | -1.0553 | -1.0347 | -0.6751 | -0.7299 | -0.7434 | -0.6834 | -0.7623 | -0.5295 | -0.6053 | -0.4284 |
| 315 | S-1685_Q92 Q92608 | Dedicator of cytc DOCK2 KIAA    | 1.3877  | 1.3597  | 1.6782  | 1.6763  | 1.6900  | 1.4494  | 2.1867  | 1.9239  | 1.0328  | 1.1256  |
| 316 | S-169_Q435 Q43598 | 2'-deoxynucleosi DNP1 C6or      | 0.3752  | 0.5274  | -0.6291 | -0.8888 | -0.5612 | -0.5775 | -0.4648 | -0.8492 | -0.5357 | -0.3757 |
| 317 | S-169_Q9H4 Q9H4L4 | Sentrin-specific p SENP3 SSP3   | -0.3548 | -0.5258 | -0.8415 | -0.8056 | -1.0902 | -0.4380 | -0.8276 | -1.0372 | -1.2509 | -0.7907 |
| 318 | S-1692_Q9Y Q9Y2F5 | Little elongation ICE1 KIAA09   | -0.8343 | -0.6780 | -0.6424 | -0.6151 | -0.3014 | -0.6333 | -0.6948 | -0.5971 | -0.7007 | -0.3040 |
| 319 | S-17_O0019 O00193 | Small acidic prot SMAP C11or    | 0.0685  | 0.5269  | -0.3725 | -0.3319 | -0.3248 | -0.7009 | -0.3054 | -0.6117 | -0.2196 | -0.3388 |
| 320 | S-17_P3968 P39687 | Acidic leucine-ric ANP32A C15   | -0.5768 | -0.6966 | -0.3977 | 0.0846  | -0.0496 | -0.2907 | -0.0368 | 0.2088  | -0.5189 | -0.6876 |
| 321 | S-17_P4945 P49450 | Histone H3-like c CENPA         | -2.1404 | -1.7329 | -2.0403 | -2.1960 | -2.0515 | -1.8397 | -2.1693 | -2.1412 | -2.3939 | -2.1476 |
| 322 | S-17_P5399 P53999 | Activated RNA p SUB1 PC4 RF     | -0.4211 | -0.3114 | 0.1762  | 0.1630  | -0.0805 | -0.0030 | -0.2427 | -0.1667 | 0.3102  | 0.4450  |
| 323 | S-17_Q96F1 Q96F15 | GTPase IMAP fan GIMAP5 IAN      | 0.1012  | -0.0201 | -0.0818 | -0.2206 | -0.2628 | -0.0210 | -0.1766 | -0.1328 | -0.2052 | -0.1462 |
| 324 | S-170_P095 P09543 | 2',3'-cyclic-nuclei CNP         | 0.0928  | 0.0723  | 0.1817  | 0.2252  | -0.1360 | 0.3106  | 0.1562  | 0.3329  | 0.0883  | -0.0325 |
| 325 | S-170_Q8N Q8NHV1  | GTPase IMAP fan GIMAP7 IAN      | -0.7274 | -0.7110 | -0.8247 | -0.4275 | -0.6251 | -0.5798 | -0.6439 | -0.5675 | -0.7465 | -0.8874 |
| 326 | S-170_Q96D Q96D71 | RalBP1-associate REPS1          | -0.6487 | -1.1212 | 0.6126  | 0.5013  | 0.2795  | 0.6771  | 0.0722  | 0.3830  | 0.8053  | 0.9871  |
| 327 | S-1705_Q92 Q92608 | Dedicator of cytc DOCK2 KIAA    | 0.8636  | 0.9273  | 1.4653  | 1.5471  | 1.2364  | 1.5968  | 1.3018  | 1.6296  | 1.1216  | 0.9422  |
| 328 | S-171_O751 O75152 | Zinc finger CCCH ZC3H11A KIA    | 0.3037  | 0.4476  | -0.1947 | -0.0692 | -0.0669 | 0.2023  | -0.0502 | 0.2114  | -0.1306 | 0.0740  |
| 329 | S-171_Q8N Q8N9T8  | Protein KRI1 hon KRI1           | 0.1230  | -0.0738 | -0.2104 | 0.0229  | -0.6336 | -0.6954 | 0.1550  | 0.1453  | 0.0871  | 0.1936  |
| 330 | S-1714_P35 P35579 | Myosin-9 (Cellul MYH9           | 0.0180  | 0.1828  | 0.5229  | 0.2657  | 0.4856  | 0.7462  | 0.4436  | 0.8797  | 0.8821  | 0.4693  |
| 331 | S-1721_Q15 Q15149 | Plectin (PCN) (PL PLEC PLEC1    | -1.8523 | -1.7664 | -1.6835 | -0.8056 | -1.0251 | -1.2388 | -1.2138 | -1.0154 | -1.5263 | -1.2788 |
| 332 | S-1722_Q9U Q9UUK3 | Protein mono-AC PARP4 ADPF      | -0.3641 | -0.7496 | -0.3303 | -0.4204 | -0.5667 | -0.6411 | -0.0760 | -0.0419 | -0.4766 | -0.6752 |
| 333 | S-1729_Q9U Q9UQ35 | Serine/arginine r SRRM2 KIAA    | 0.1911  | 0.0077  | 0.1734  | 0.2206  | 0.4333  | 0.3213  | 0.1952  | 0.2835  | 0.6086  | 0.6516  |
| 334 | S-173_Q153 Q15365 | Poly(rC)-binding PCBP1          | 0.1134  | -0.0819 | -0.2271 | -0.2031 | -0.2133 | 0.1127  | -0.0767 | 0.0870  | -0.0219 | 0.0394  |
| 335 | S-173_Q69Y Q69YN4 | Protein virilizer h VIRMA KIAA  | -0.2805 | -0.1492 | 0.2200  | 0.2538  | 0.0462  | 0.0382  | 0.2155  | 0.2734  | 0.2370  | 0.2564  |
| 336 | S-1731_Q9U Q9UQ35 | Serine/arginine r SRRM2 KIAA    | 1.0962  | 0.9331  | 0.8771  | 0.9475  | 1.0444  | 1.0468  | 0.9572  | 1.1117  | 1.5093  | 1.5142  |
| 337 | S-1732_Q9U Q9UQ35 | Serine/arginine r SRRM2 KIAA    | 0.7272  | 0.7063  | 0.4680  | 0.6550  | 0.8219  | 0.7066  | 0.6711  | 0.6700  | 0.8105  | 0.7913  |
| 338 | S-1736_Q92 Q92608 | Dedicator of cytc DOCK2 KIAA    | 1.2986  | 1.3862  | 1.4226  | 1.1968  | 1.1668  | 1.3543  | 1.3065  | 1.4853  | 1.2816  | 1.4915  |
| 339 | S-174_P279 P27987 | Inositol-trisphosph ITPKB       | -3.0553 | -2.9298 | -2.7630 | -2.8691 | -2.6949 | -2.8995 | -3.2975 | -2.5251 | -2.3939 | -2.0013 |
| 340 | S-174_Q929 Q92974 | Rho guanine nuc ARHGEF2 KIA     | -0.0628 | -0.1394 | -0.6486 | -0.4713 | -1.0139 | -0.4061 | -0.6872 | -0.6159 | -0.3939 | -0.5214 |
| 341 | S-174_Q96A Q96A70 | Antizyme inhibitor AZIN2 ADC k  | 0.6005  | 0.3007  | 0.5156  | 0.5713  | -0.0573 | 0.2937  | 0.4215  | 0.2998  | 0.2975  | 0.1902  |
| 342 | S-175_Q6PC Q6PCE3 | Glucose 1,6-bisphosph PGM2L1 BM | 1.1282  | 1.1731  | 0.2818  | 0.2925  | 0.4470  | 0.3495  | 0.5260  | 0.3801  | 0.2747  | 0.3970  |
| 343 | S-175_Q7Z5 Q7Z5L9 | Interferon regula IRF2BP2       | 1.3248  | 1.6478  | 0.5425  | 0.7309  | 0.6797  | 0.4357  | 0.5226  | 0.3305  | 0.3546  | 0.5965  |
| 344 | S-1757_Q14 Q14980 | Nuclear mitotic a NUMA1 NM      | 0.6738  | 0.8410  | -0.1971 | -0.1558 | -0.0922 | -0.3463 | 0.1421  | -0.0123 | -0.0026 | -0.0418 |
| 345 | S-176_Q134 Q13442 | 28 kDa heat- and PDAP1 HASF     | -0.2805 | -0.4865 | 0.4642  | -0.6384 | 0.0480  | -0.2870 | -0.0170 | -0.1857 | -0.4356 | -0.6488 |
| 346 | S-176_Q32P Q32P44 | Echinoderm micr EML3            | -0.2182 | -0.4437 | 0.8788  | 0.1063  | 0.3243  | -0.0561 | 0.4254  | 0.0407  | -0.0356 | -0.1720 |
| 347 | S-177_O753 O75396 | Vesicle-trafficking SEC22B SEC  | 0.4929  | 0.2962  | 0.7137  | -0.0287 | 0.5810  | -0.2128 | 0.2617  | -0.0061 | -0.3045 | -1.0431 |
| 348 | S-177_O754 O75475 | PC4 and SFRS1-ir PSIP1 DFS70    | -0.4645 | -0.5177 | -0.3145 | -0.2371 | -0.4058 | -0.2765 | -0.5130 | -0.2881 | -0.3158 | -0.1439 |
| 349 | S-177_Q096 Q09666 | Neuroblast differ AHNAK PM2     | 1.0911  | 0.9156  | 1.1243  | 0.9195  | 0.4908  | 0.6556  | 1.1064  | 0.7915  | -0.2602 | -0.0052 |

|     |            |        |                     |              |         |         |         |         |         |         |         |         |         |         |
|-----|------------|--------|---------------------|--------------|---------|---------|---------|---------|---------|---------|---------|---------|---------|---------|
| 350 | S-177_Q150 | Q15024 | Exosome comple      | EXOSC7 KIAA  | -0.6431 | -0.3934 | -0.7559 | -1.0824 | -1.2172 | -0.9503 | -1.2753 | -1.1892 | -0.7078 | -0.3024 |
| 351 | S-177_Q9NY | Q9NYF8 | Bcl-2-associated    | BCLAF1 BTF   | 1.7771  | 1.9233  | 1.9389  | 2.3201  | 2.0937  | 1.9638  | 2.1914  | 2.2111  | 2.0081  | 1.9671  |
| 352 | S-178_Q8WV | Q8WUA2 | Peptidyl-prolyl ci  | PP1L4        | -2.1484 | -2.0122 | -2.2092 | -2.1960 | -2.2387 | -1.9162 | -2.4103 | -2.1684 | -2.4356 | -1.7997 |
| 353 | S-178_Q9BZ | Q9BZ23 | Pantothenate kir    | PANK2 C20c   | -1.0478 | -0.8578 | -0.5110 | -0.4961 | -0.7069 | -0.4624 | -0.6726 | -0.6395 | -0.6783 | -0.7404 |
| 354 | S-179_O954 | O95429 | BAG family mole     | BAG4 SODD    | 0.1263  | 0.0099  | 0.1909  | 0.3560  | 0.3273  | 0.3344  | 0.3712  | 0.3665  | 0.0052  | 0.0331  |
| 355 | S-179_P027 | P02794 | Ferritin heavy ch   | FTH1 FTH FT  | 0.9928  | 1.3292  | 1.0115  | 1.7368  | 1.3199  | 1.5478  | 1.3118  | 1.5865  | 0.8579  | 0.9179  |
| 356 | S-179_Q6JB | Q6JBY9 | CapZ-interacting    | RCS1 CAPZ    | 0.5089  | 0.5382  | 0.7323  | 0.3128  | 0.7769  | 0.2350  | 0.7310  | 0.4475  | 0.1248  | 0.0544  |
| 358 | S-18_P2349 | P23497 | Nuclear autoanti    | SP100        | 0.4499  | 0.5449  | 0.3902  | 0.3781  | 0.3578  | 0.5263  | 0.4398  | 0.4336  | 0.2080  | 0.2883  |
| 359 | S-18_Q86YV | Q86YV0 | RAS protein activ   | RASAL3       | 0.0928  | -0.1578 | 0.5496  | 0.5126  | 0.2658  | 0.5149  | 0.7558  | 0.4550  | 0.3647  | 0.2336  |
| 360 | S-18_Q8N3X | Q8N3X1 | Formin-binding p    | FNBP4 FBP3   | -0.8508 | -0.7438 | -0.8551 | -0.8267 | -0.9025 | -1.0168 | -0.8985 | -1.0183 | -0.8733 | -0.9223 |
| 361 | S-18_Q9300 | Q93009 | Ubiquitin carbox    | USP7 HAUSF   | -0.1325 | 0.0055  | -1.1522 | -1.4444 | -0.9520 | -1.1405 | -0.9278 | -0.9025 | -0.9961 | -1.0780 |
| 362 | S-18_Q9H6F | Q9H6F5 | Coiled-coil doma    | CCDC86 CYC   | 0.5471  | 0.4460  | 0.2137  | 0.2819  | 0.3125  | 0.3774  | 0.4273  | 0.3207  | 0.1944  | 0.4823  |
| 363 | S-180_O151 | O15156 | Zinc finger and B   | ZBTB7B ZBTI  | -0.8426 | -1.0832 | -1.9648 | -1.4987 | -1.4948 | -1.2284 | -1.1988 | -1.2716 | -1.1150 | -1.1419 |
| 364 | S-180_P0C1 | P0C1Z6 | TCF3 fusion part    | TFPT INO80F  | -0.7394 | -0.4943 | -0.2572 | -0.5012 | -0.5027 | -0.3577 | -0.3462 | -0.4564 | -0.2633 | -0.5875 |
| 365 | S-180_Q6DN | Q6DN90 | IQ motif and SEC    | IQSEC1 ARFC  | -2.2565 | -2.7256 | -1.0211 | -1.5087 | -1.4141 | -1.9911 | -1.1605 | -1.1178 | -1.7014 | -2.2541 |
| 366 | S-181_P525 | P52594 | Arf-GAP domain      | AGFG1 HRB    | 0.7744  | 0.7385  | 0.9483  | 0.4606  | 0.9098  | 1.0454  | 0.7930  | 0.6585  | 0.9457  | 0.4887  |
| 367 | S-181_Q929 | Q92945 | Far upstream ele    | KHSRP FUBP   | -0.7637 | -0.6823 | -0.4873 | -0.7328 | -0.4439 | -0.4522 | -0.6562 | -0.6683 | -0.3353 | -0.6980 |
| 368 | S-181_Q9BV | Q9BVG4 | Protein PBDC1 (F    | PBDC1 CXori  | -2.4211 | -2.5728 | -1.1042 | -0.9087 | -0.5639 | -0.9106 | -1.0355 | -0.6159 | -1.0409 | -0.9114 |
| 369 | S-181_Q9BX | Q9BXB4 | Oxysterol-bindin    | OSBPL11 OR   | 0.7435  | 0.7491  | 0.4528  | 0.4199  | 0.0710  | 0.1932  | 0.1433  | 0.2454  | 0.1435  | 0.4047  |
| 370 | S-181_Q9H1 | Q9H1E3 | Nuclear ubiquito    | NUCKS1 NUO   | 1.4089  | 1.3137  | 1.3998  | 1.3315  | 1.1863  | 1.0824  | 1.3418  | 1.2665  | 1.1078  | 0.9714  |
| 371 | S-1814_O95 | O95613 | Pericentrin (Kenc   | PCNT KIAA0   | -1.1285 | -0.9682 | -0.5829 | -0.2951 | -0.3682 | -0.6044 | -0.4017 | -0.4860 | -1.1207 | -1.0999 |
| 372 | S-182_Q8TB | Q8TB72 | Pumilio homolog     | PUM2 KIAAC   | 0.2979  | 0.0328  | 0.0705  | 0.1835  | 0.0814  | -0.0438 | 0.0510  | 0.3047  | 0.1162  | -0.0524 |
| 373 | S-182_Q9Y3 | Q9Y3P8 | Signaling threshc   | SIT1 SIT     | -0.0422 | -0.2547 | 0.0203  | 0.2116  | 0.4617  | 0.6435  | 0.2008  | 0.4826  | 0.3740  | 0.3913  |
| 374 | S-183_O001 | O00148 | ATP-dependent f     | DDX39A DD    | -0.5661 | -0.3019 | -0.2189 | -0.3529 | -0.3192 | -0.0030 | -0.4189 | -0.5251 | -0.3452 | -0.5856 |
| 375 | S-183_Q8IZ | Q8IZP0 | Abl interactor 1    | (ABI1 SSH3BF | 1.1727  | 1.0355  | 1.1909  | 1.2068  | 1.3375  | 1.4570  | 0.9784  | 1.1928  | 1.2370  | 1.4717  |
| 376 | S-183_Q96B | Q96B97 | SH3 domain-coni     | SH3KBP1 CIN  | 0.3738  | 0.3752  | 0.5185  | 0.4292  | 0.3258  | 0.4586  | 0.3325  | 0.3877  | 0.4727  | 0.2171  |
| 377 | S-1832_Q14 | Q14573 | Inositol 1,4,5-tris | ITPR3        | -1.0972 | -1.0234 | -1.3277 | -1.4252 | -1.2172 | -1.1017 | -1.0678 | -1.2102 | -1.1992 | -0.7512 |
| 378 | S-184_O954 | O95466 | Formin-like prote   | FMNL1 C17c   | 1.1863  | 1.1251  | 1.2564  | 1.3201  | 0.7807  | 0.9142  | 0.8517  | 0.9660  | 0.8551  | 0.4211  |
| 379 | S-184_P193 | P19338 | Nucleolin (Protei   | NCL          | 0.8233  | 0.7894  | 1.2361  | 0.3308  | 1.3317  | 0.6125  | 0.7810  | 0.8622  | 1.5534  | 1.5119  |
| 380 | S-1847_Q14 | Q14980 | Nuclear mitotic ε   | NUMA1 NM     | -1.2015 | -0.9748 | -1.0190 | -0.7358 | -0.9917 | -0.8666 | -0.6914 | -0.8382 | -0.9203 | -0.9138 |
| 381 | S-185_Q1KM | Q1KMD3 | Heterogeneous r     | HNRNPUL2 I   | -0.0761 | 0.0828  | 0.0115  | 1.1194  | 0.9137  | 0.4510  | 0.2211  | 0.5737  | -0.3158 | 0.7007  |
| 382 | S-185_Q86X | Q86XP3 | ATP-dependent f     | DDX42        | -0.2630 | -0.2788 | 0.0991  | 0.0369  | 0.1124  | 0.4113  | 0.0397  | 0.4605  | 0.5061  | 0.4076  |
| 383 | S-185_Q9H4 | Q9H4A3 | Serine/threonine    | WNK1 HSN2    | -0.7699 | -1.2365 | 1.7759  | 1.5343  | 1.4065  | 1.6720  | 1.6452  | 1.5577  | 1.4524  | 1.4823  |
| 384 | S-185_Q9UE | Q9UBE0 | SUMO-activating     | SAE1 AOS1 S  | 0.1378  | -0.0313 | 0.2236  | 0.3712  | 0.7283  | 0.8339  | 0.6364  | 0.9093  | 0.3423  | 0.3891  |
| 385 | S-1858_Q03 | Q03164 | Histone-lysine N-   | KMT2A ALL1   | -1.9468 | -2.2235 | -1.9325 | -1.3507 | -1.5639 | -1.5599 | -1.3897 | -1.2496 | -1.9653 | -1.6109 |
| 386 | S-1859_P27 | P27708 | CAD protein [Incl   | CAD          | 1.0072  | 0.8002  | 1.4886  | 1.0299  | 1.5574  | 1.8883  | 1.7462  | 1.7042  | 1.3289  | 0.8009  |
| 387 | S-186_P224 | P22415 | Upstream stimul.    | USF1 BHLHB   | 1.9215  | 2.0088  | 1.4389  | 1.7918  | 1.6791  | 1.3549  | 1.7990  | 1.6232  | 1.3818  | 1.3930  |
| 388 | S-187_P325 | P32519 | ETS-related trans   | ELF1         | 1.4980  | 1.5506  | 1.4288  | 1.5263  | 1.0892  | 1.4324  | 1.4186  | 1.3103  | 1.2805  | 1.2714  |
| 389 | S-187_Q9UC | Q9UQN3 | Charged multive:    | CHMP2B CG    | 0.3668  | 0.2662  | 0.8969  | 1.1292  | 0.8930  | 0.6716  | 0.5785  | 0.6360  | 0.7790  | 0.8031  |

|     |             |        |                                |         |         |         |         |         |         |         |         |         |         |
|-----|-------------|--------|--------------------------------|---------|---------|---------|---------|---------|---------|---------|---------|---------|---------|
| 390 | S-1876_Q12  | Q12802 | A-kinase anchor AKAP13 BRX     | -1.7334 | -2.0212 | -1.7881 | -1.4492 | -1.7009 | -1.9618 | -1.5863 | -2.0947 | -2.0927 | -1.7997 |
| 391 | S-188_O952  | O95218 | Zinc finger Ran-b ZRANB2 ZIS   | 0.6405  | 0.6817  | 0.6344  | 0.6595  | 0.4347  | 0.8612  | 0.4636  | 0.8546  | 0.6769  | 0.6301  |
| 392 | S-188_P432  | P43243 | Matrin-3 MATR3 KIAA            | -2.5213 | -2.5794 | -3.0796 | -2.4156 | -2.5158 | -2.9561 | -2.6338 | -2.6732 | -3.4426 | -2.7297 |
| 393 | S-189_P332  | P33241 | Lymphocyte-spei LSP1 WP34      | 0.2988  | 0.3125  | 0.7913  | 0.7840  | 0.4717  | 0.3029  | 0.4381  | 0.5853  | 0.8623  | 0.9711  |
| 394 | S-189_Q153  | Q15365 | Poly(rC)-binding PCBP1         | -0.6041 | -0.7950 | -0.9526 | -1.4886 | -1.0863 | -0.4727 | -1.0705 | -0.7102 | -0.6252 | -0.7774 |
| 395 | S-189_Q81YI | Q81YL3 | UPF0688 protein C1orf174       | 1.5025  | 1.3951  | 1.4124  | 0.8223  | 1.2064  | 1.3520  | 1.5149  | 1.5246  | 1.2896  | 1.3728  |
| 396 | S-189_Q96E  | Q96E09 | Protein FAM122/ FAM122A C9     | -0.1747 | -0.3156 | -0.2032 | 0.0018  | -0.4043 | -0.0090 | -0.1810 | 0.0672  | 0.1576  | -0.0538 |
| 397 | S-19_O7517  | O75179 | Ankyrin repeat d ANKRD17 G1    | -1.1808 | -1.5306 | -1.1453 | -1.1090 | -1.2829 | -1.3634 | -1.1318 | -1.4314 | -1.0679 | -0.8638 |
| 398 | S-19_P5399  | P53999 | Activated RNA pr SUB1 PC4 RF   | -0.3116 | -0.0246 | -0.1337 | -0.2712 | -0.3100 | -0.0795 | -0.4505 | -0.5562 | 0.1162  | 0.1936  |
| 399 | S-19_Q6PK0  | Q6PK04 | Coiled-coil doma CCDC137 cP    | -0.5931 | -0.3434 | -0.6569 | -0.5138 | -0.4117 | -0.2726 | -0.2365 | -0.3908 | -1.0543 | -0.8874 |
| 400 | S-19_Q9H1E  | Q9H1E3 | Nuclear ubiquito NUCKS1 NU     | -0.2959 | -0.0738 | -0.4439 | -0.3394 | -0.4464 | -0.3916 | -0.5193 | -0.5339 | -0.4278 | -0.3006 |
| 401 | S-19_Q9NUI  | Q9NUE0 | Palmitoyltransfei ZDHHC18      | 0.3169  | 0.0713  | -0.0577 | -0.1777 | -0.0611 | 0.0852  | 0.1088  | 0.1188  | -0.1507 | -0.2664 |
| 402 | S-19_Q9UNI  | Q9UNE7 | E3 ubiquitin-prot STUB1 CHIP   | -0.1625 | 0.3142  | 0.3198  | 0.8668  | 0.6318  | 0.7576  | 0.5208  | 0.8689  | 0.3070  | 0.3881  |
| 403 | S-190_O608  | O60841 | Eukaryotic transl EIF5B IF2 KI | 0.0233  | -0.0461 | 0.1272  | -0.1617 | 0.1871  | -0.0165 | -0.3728 | -0.2298 | 0.2524  | 0.1800  |
| 404 | S-190_Q129  | Q12906 | Interleukin enha ILF3 DRBF M   | -0.9820 | -0.8378 | -1.3068 | -1.2842 | -1.2044 | -1.0732 | -1.4242 | -1.1378 | -1.5189 | -1.0378 |
| 405 | S-190_Q153  | Q15365 | Poly(rC)-binding PCBP1         | 0.4722  | 0.5258  | 0.6404  | 0.8333  | 0.5270  | 0.6134  | 0.4030  | 0.3900  | 0.4932  | 0.6117  |
| 406 | S-192_Q8NE  | Q8ND56 | Protein LSM14 h LSM14A C19     | -0.6374 | -0.3920 | -0.8453 | -0.8789 | -0.8927 | -0.7222 | -0.5327 | -0.7820 | -0.6909 | -0.6959 |
| 407 | S-193_P220  | P22059 | Oxysterol-bindin OSBP OSBP1    | -0.7828 | -0.8799 | -0.7485 | -0.8362 | -0.5493 | -0.7711 | -0.9265 | -0.8863 | -0.4492 | -0.1138 |
| 408 | S-193_P422  | P42229 | Signal transducei STAT5A STA   | 0.0550  | -0.6948 | -1.0105 | -1.3689 | -1.4897 | -0.7620 | -0.3528 | -1.3204 | -1.1292 | -1.4336 |
| 409 | S-193_Q1KM  | Q1KMD3 | Heterogeneous r HNRNPUL2 I     | -1.2565 | -1.2762 | 0.8879  | 1.1013  | 1.2901  | 1.2937  | 1.0277  | 1.3671  | 0.7737  | 0.9429  |
| 410 | S-193_Q8NA  | Q8NAV1 | Pre-mRNA-splicir PRPF38A       | 0.0962  | 0.0744  | -0.4129 | -0.6137 | -0.2562 | -0.7124 | -0.1649 | -0.5207 | -0.2696 | -0.0039 |
| 411 | S-194_Q435  | Q43513 | Mediator of RNA MED7 ARC3      | -0.1605 | -0.3156 | -0.2275 | -0.3104 | -0.1564 | -0.0546 | -0.3023 | 0.0107  | 0.0448  | 0.0642  |
| 412 | S-194_O755  | O75533 | Splicing factor 3E SF3B1 SAP1  | 0.4813  | 0.5041  | 0.1118  | 0.2523  | 0.1544  | 0.3751  | 0.1620  | 0.5727  | 0.3196  | -0.1925 |
| 413 | S-194_P086  | P08651 | Nuclear factor 1 NFIC NFI      | -3.3735 | -3.7627 | -2.3785 | -1.8244 | -2.2387 | -2.3369 | -2.2473 | -2.1753 | -2.6638 | -2.0917 |
| 414 | S-194_Q166  | Q16629 | Serine/arginine-r SRSF7 SFRS7  | 1.0454  | 0.9244  | 0.6558  | 0.9326  | 0.6854  | 0.4180  | 0.8160  | 0.8797  | 0.6891  | 0.9001  |
| 415 | S-194_Q6UV  | Q6UWD8 | Transmembrane C16orf54 UN      | -0.7335 | -0.7827 | -0.7480 | -0.8471 | -1.0010 | -0.8279 | -0.7953 | -0.8557 | -1.0114 | -1.0285 |
| 416 | S-194_Q9BL  | Q9BUJ2 | Heterogeneous r HNRNPUL1 I     | 0.5643  | 0.6796  | 0.2137  | 0.4371  | 0.4750  | 0.5107  | 0.3742  | 0.0540  | 0.4491  | 0.3482  |
| 417 | S-1941_Q94  | Q94915 | Protein furry hor FRYL AF4P1   | -0.8201 | -1.4258 | 0.5053  | 0.3588  | -0.0746 | 0.5221  | 0.1076  | 0.3059  | 0.2513  | 0.1185  |
| 418 | S-1943_P35  | P35579 | Myosin-9 (Cellulc MYH9         | 0.4352  | 0.7233  | 0.3522  | 0.5013  | 0.5966  | 0.1239  | 0.4869  | 0.0212  | 0.2425  | 0.5968  |
| 419 | S-195_P432  | P43243 | Matrin-3 MATR3 KIAA            | -0.7600 | -0.6775 | -0.4414 | -0.6117 | -0.5232 | -0.6183 | -0.6908 | -0.6635 | -0.4665 | -0.2411 |
| 420 | S-195_Q6NY  | Q6NYC8 | Phostensin (Prot PPP1R18 HK    | -0.5317 | -0.4619 | -0.1546 | -0.4085 | -0.2896 | -0.1017 | 0.1112  | -0.0231 | -0.3922 | -0.5645 |
| 421 | S-196_Q081  | Q08117 | TLE family memk TLE5 AES GR NA | NA      | NA      | -3.2991 | -1.9911 | -2.4240 | -2.3071 | -2.4382 | -2.5163 | -3.7400 | -3.7383 |
| 422 | S-196_Q166  | Q16629 | Serine/arginine-r SRSF7 SFRS7  | 0.0894  | 0.0891  | 0.5723  | 0.5879  | 0.1725  | 0.2342  | 0.1243  | 0.3700  | 0.8722  | 1.0280  |
| 423 | S-196_Q9BV  | Q9BW71 | HIRA-interacting HIRIP3        | -1.1767 | -1.6752 | -1.2165 | -0.8338 | -1.1139 | -1.2318 | -1.3330 | -1.1684 | -1.0170 | -1.0090 |
| 424 | S-196_Q9NY  | Q9NYF8 | Bcl-2-associated BCLAF1 BTF    | -0.3071 | -0.3392 | -0.1019 | -0.1459 | -0.0083 | 0.2593  | -0.1693 | 0.0745  | 0.4510  | 0.3258  |
| 425 | S-197_Q6PII | Q6PID6 | Tetratricopeptidc TTC33        | 0.3484  | 0.3502  | -0.0179 | 0.0678  | 0.3081  | 0.5086  | 0.4475  | 0.3795  | 0.3627  | 0.2639  |
| 426 | S-197_Q96J  | Q96JY6 | PDZ and LIM don PDLIM2 PP6     | -0.8105 | -0.8882 | -0.8118 | -0.9020 | -0.6166 | -0.6504 | -0.5941 | -0.5562 | -1.0436 | -1.0431 |
| 427 | S-197_Q9UF  | Q9UP83 | Conserved oligor COG5 GOLT     | 0.3527  | 0.2504  | -0.1935 | -0.0692 | -0.4240 | -0.4522 | -0.2911 | -0.5033 | -0.4338 | -0.1998 |
| 428 | S-198_Q5T2  | Q5T200 | Zinc finger CCCH ZC3H13 KIA    | 1.7343  | 1.7788  | 1.8222  | 1.8751  | 1.8260  | 1.5899  | 1.7711  | 1.7657  | 1.4558  | 1.2857  |

|     |            |        |                                         |         |         |         |         |         |         |         |         |         |         |
|-----|------------|--------|-----------------------------------------|---------|---------|---------|---------|---------|---------|---------|---------|---------|---------|
| 429 | S-199_Q079 | Q07955 | Serine/arginine-r SRSF1 ASF SI          | 1.2792  | 1.4606  | 1.0554  | 1.2364  | 0.9870  | 1.0086  | 0.9493  | 1.0976  | 1.2400  | 1.2451  |
| 430 | S-199_Q146 | Q14699 | Raftlin (Cell migr. RFTN1 KIAA)         | -0.3829 | -0.6248 | 0.0864  | 0.1112  | -0.1646 | -0.0499 | -0.3594 | -0.0216 | -0.3652 | -0.7127 |
| 431 | S-20_Q4356 | Q43566 | Regulator of G-pi RGS14                 | -0.3595 | -0.6594 | -0.6258 | -0.3529 | -0.5053 | -0.2943 | -0.4594 | -0.2244 | -0.3502 | -0.2132 |
| 432 | S-20_P2484 | P24844 | Myosin regulator MYL9 MLC2              | 1.7375  | 1.8163  | 0.5568  | 0.2068  | -0.0688 | 1.2393  | 0.7081  | 0.8655  | -0.1814 | 0.1066  |
| 433 | S-20_P4120 | P41208 | Centrin-2 (Caltra CETN2 CALT            | 1.3491  | 1.2279  | 0.2859  | 0.5471  | 1.1626  | 0.8603  | 1.0504  | 0.9215  | 0.4338  | 0.4933  |
| 434 | S-20_P5256 | P52566 | Rho GDP-dissociation ARHGDI B           | 0.5813  | 0.6503  | 0.3080  | 0.4052  | 0.1226  | 0.9134  | 0.5432  | 0.7247  | 0.7163  | 0.6920  |
| 435 | S-20_Q1359 | Q13595 | Transformer-2 protein TRA2A             | 1.1468  | 1.1301  | 1.5371  | 1.7400  | 1.7115  | 1.1867  | 1.4961  | 1.4875  | 1.6782  | 1.7639  |
| 436 | S-200_Q155 | Q15555 | Microtubule-associated MAPRE2 RP        | -1.4259 | -0.6858 | -1.0211 | -0.7240 | -1.0326 | -0.7594 | -0.6726 | -0.2753 | -1.0734 | -1.1851 |
| 437 | S-200_Q9Y3 | Q9Y3E7 | Charged multivalent CHMP3 CGI1          | -0.1849 | -0.0011 | -0.5751 | -0.2394 | -0.1340 | 0.4379  | 0.0052  | 0.3486  | 0.2943  | 0.3832  |
| 438 | S-201_P202 | P20290 | Transcription factor BTF3 NACB          | 0.0410  | -0.0359 | 0.2379  | 0.1046  | 0.1610  | 0.5529  | -0.2018 | 0.0903  | 0.4793  | 0.6185  |
| 439 | S-201_P226 | P22626 | Heterogeneous ribosomal HNRNPA2B1       | 0.4696  | 0.2671  | 0.8941  | 0.6242  | 0.6530  | 0.3933  | 0.7357  | 0.4727  | 0.8311  | 0.8932  |
| 440 | S-202_P518 | P51858 | Hepatoma-derived HDGF HMG1              | -0.2805 | -0.4066 | -0.1511 | 0.2701  | 0.1344  | -0.0577 | -0.2093 | -0.5517 | 0.3758  | -0.1677 |
| 441 | S-202_Q86X | Q86X95 | Corepressor integrin CIR1 CIR           | -0.3829 | -0.2496 | -0.1019 | -0.2373 | -0.2409 | -0.1193 | -0.3379 | -0.3338 | 0.0283  | 0.1421  |
| 442 | S-2020_Q92 | Q92614 | Unconventional myosin MYO18A CD         | 0.0286  | -0.0316 | 0.2261  | 0.1915  | -0.0795 | 0.0849  | -0.1415 | 0.0110  | -0.3153 | -0.3535 |
| 443 | S-203_Q435 | Q43566 | Regulator of G-pi RGS14                 | 0.5463  | 0.5891  | 0.9929  | 1.3602  | 1.3602  | 1.2756  | 1.3430  | 1.3603  | 0.9270  | 0.9117  |
| 444 | S-203_Q436 | Q43633 | Charged multivalent CHMP2A BC           | -0.9235 | -0.9632 | -0.9520 | -0.9221 | -1.2229 | -1.0878 | -1.3983 | -1.4522 | -0.7795 | -0.6483 |
| 445 | S-203_P005 | P00558 | Phosphoglycerate kinase PGK1 PGKA       | -0.7394 | -0.7570 | -0.5923 | -0.4639 | -0.6336 | -0.6044 | -0.8912 | -0.8465 | -0.2696 | -0.2252 |
| 446 | S-203_Q047 | Q04726 | Transducin-like receptor TLE3 KIAA15    | -0.3805 | -0.1615 | -0.5065 | -0.7007 | -0.5423 | -0.7345 | -0.4738 | -0.6781 | -0.6072 | -0.4831 |
| 447 | S-203_Q9BR | Q9BRR9 | Rho GTPase-activator ARHGAP9            | -0.2161 | -0.2748 | 0.0824  | 0.0863  | -0.2431 | -0.1922 | -0.1332 | -0.2772 | -0.2248 | -0.0431 |
| 448 | S-203_Q9H8 | Q9H8G2 | Caspase activity inhibitor CAAP1 C9orf  | -0.1030 | -0.1370 | 0.0290  | -0.5317 | 0.1494  | 0.1932  | 0.0384  | 0.2285  | 0.3403  | 0.1444  |
| 449 | S-203_Q9NY | Q9NYB0 | Telomeric repeat associated TERF2IP DRI | 1.0233  | 0.9867  | 0.8243  | 0.9195  | 0.7093  | 0.7699  | 0.5459  | 0.7265  | 0.6955  | 0.7110  |
| 450 | S-204_P279 | P27987 | Inositol-trisphosphate ITPKB            | 0.3959  | 0.1098  | 0.3257  | 0.2553  | 0.4114  | 0.4180  | 0.3243  | 0.3759  | 0.1150  | 0.3113  |
| 451 | S-204_P332 | P33241 | Lymphocyte-specific LSP1 WP34           | -0.5084 | -0.3920 | -0.5751 | -0.2972 | -0.1020 | -1.1603 | 0.1172  | -0.5163 | -1.2447 | -1.3525 |
| 452 | S-204_Q86V | Q86WR0 | Coiled-coil domain CCDC25               | -0.2805 | -0.5597 | -0.5534 | -1.2885 | -0.9168 | -0.4830 | -0.5592 | -0.2032 | -0.4356 | -0.6347 |
| 453 | S-2047_Q9U | Q9UPU5 | Ubiquitin carboxylate USP24 KIAA        | 1.8222  | 1.9728  | 1.7002  | 1.6991  | 1.5835  | 1.7043  | 1.6645  | 1.6917  | 1.6941  | 1.6454  |
| 454 | S-205_Q68D | Q68DK7 | Male-specific let-7 MSL1 MSL1L          | -0.2372 | -0.0133 | -0.0620 | -0.1777 | 0.1952  | 0.3797  | -0.2319 | 0.0730  | 0.1257  | -0.0524 |
| 455 | S-205_Q96E | Q96EV2 | RNA-binding protein RBM33 PRR4          | 1.1071  | 1.1397  | 0.0991  | 0.4502  | 0.4292  | 0.0936  | 0.5914  | 0.3629  | 0.0052  | 0.0910  |
| 456 | S-2051_Q9Y | Q9Y4A5 | Transformation/inducer TRRAP PAF4       | -0.0459 | 0.1740  | 0.9709  | 0.9731  | 0.7882  | 1.0746  | 1.1924  | 1.2160  | 0.7691  | 0.5699  |
| 457 | S-206_Q754 | Q75475 | PC4 and SFRS1-interacting PSIP1 DFS70   | 0.3932  | 0.2118  | 0.3257  | 0.4305  | 0.3317  | 0.4213  | 0.3408  | 0.2760  | 0.5261  | 0.4421  |
| 458 | S-206_P193 | P19338 | Nucleolin (Protein NCL                  | 1.0697  | 1.1607  | 0.9297  | 0.5592  | 0.7305  | 0.7292  | 0.6937  | 0.9036  | 1.5079  | 1.5020  |
| 459 | S-206_Q8W  | Q8WYJ6 | Septin-1 (LARP) (SEPTIN1 DIF            | -0.3049 | -0.0680 | -0.0285 | -0.0053 | -0.0382 | 0.4213  | -0.5421 | -0.0689 | 0.2091  | -0.1110 |
| 460 | S-206_Q96J | Q96JH8 | Ras-associating domain RADIL KIAA1      | -1.3548 | -1.2081 | -1.3922 | -0.6834 | -1.1060 | -2.1471 | -0.7083 | -1.2032 | -1.4640 | -1.1619 |
| 461 | S-207_P525 | P52564 | Dual specificity kinase MAP2K6 ME       | -1.0666 | -1.0832 | -0.6356 | -0.5975 | -0.8690 | -0.3924 | -0.5516 | -0.2406 | -0.7487 | -0.6670 |
| 462 | S-207_Q055 | Q05519 | Serine/arginine-rich SRSF11 SFRS        | 0.2890  | 0.4509  | 0.1743  | 0.2160  | 0.2238  | 0.4023  | 0.3315  | 0.3688  | 0.3133  | 0.4202  |
| 463 | S-207_Q130 | Q13094 | Lymphocyte cytochrome LCP2              | -0.8799 | -1.0374 | -1.1334 | -1.2830 | -1.4725 | -1.0463 | -1.3699 | -1.6794 | -1.1144 | -1.5892 |
| 464 | S-207_Q141 | Q14151 | Scaffold attachment SAFB2 KIAA          | 0.7315  | 1.0274  | 0.8703  | 1.1446  | 0.4361  | 1.1583  | 0.8852  | 0.9877  | 1.0859  | 0.7703  |
| 465 | S-2071_Q9U | Q9UQ35 | Serine/arginine rich SRRM2 KIAA         | -0.8233 | -0.5053 | -0.6701 | -0.7358 | -0.7403 | -1.0985 | -0.8912 | -0.8437 | -0.9678 | -0.7577 |
| 466 | S-2073_P12 | P12270 | Nucleoprotein transcription TPR         | -1.5959 | -1.8923 | 1.2498  | 1.4580  | 1.1855  | 1.1012  | 1.6645  | 1.4929  | 0.9724  | 1.1623  |
| 467 | S-2077_Q9Y | Q9Y4A5 | Transformation/inducer TRRAP PAF4       | 0.3052  | 0.2031  | 0.7872  | 0.6493  | 0.6005  | 0.7821  | 0.8746  | 0.7431  | 0.5207  | 0.5250  |

|     |             |        |                    |               |         |         |         |         |         |         |         |         |         |         |
|-----|-------------|--------|--------------------|---------------|---------|---------|---------|---------|---------|---------|---------|---------|---------|---------|
| 468 | S-208_Q948  | O94880 | PHD finger prote   | PHF14 KIAA    | -1.5904 | -1.5021 | -1.6903 | -1.7748 | -1.7936 | -1.6551 | -1.5902 | -1.6830 | -1.3939 | -1.3362 |
| 469 | S-208_Q011  | Q01130 | Serine/arginine-r  | SRSF2 SFRS2   | 1.8616  | 1.7868  | 1.6191  | 1.9298  | 1.6710  | 1.5630  | 1.6230  | 2.3952  | 2.0322  | 2.1233  |
| 470 | S-209_Q8IYE | Q8IYB3 | Serine/arginine r  | SRRM1 SRM     | -0.7854 | -0.9361 | -0.5488 | -0.3148 | -0.7683 | -0.7222 | -0.5459 | -0.4294 | -0.7163 | -0.6208 |
| 471 | S-209_Q8NA  | Q8NAV1 | Pre-mRNA-splicir   | PRPF38A       | -0.7905 | -0.5792 | -0.6916 | -0.6020 | -0.6962 | -0.8463 | -0.5406 | -0.7635 | -0.9758 | -0.8202 |
| 472 | S-2099_Q8N  | Q8NF50 | Dedicator of cytc  | DOCK8         | 0.1312  | 0.0765  | 0.4589  | 0.3767  | 0.5649  | 0.4080  | 0.5689  | 0.5415  | 0.1353  | 0.0166  |
| 473 | S-21_P0624  | P06241 | Tyrosine-protein   | FYN           | 0.2666  | 0.4056  | -0.2262 | -0.2951 | -0.3922 | -0.5820 | -0.1605 | -0.0769 | -0.6680 | -0.6248 |
| 474 | S-21_P4979  | P49792 | E3 SUMO-proteir    | RANBP2 NUI    | -0.2266 | -0.1865 | -0.1314 | -0.2082 | -0.2150 | 0.1226  | -0.2659 | -0.0529 | 0.0624  | 0.1054  |
| 475 | S-21_P8336  | P83369 | U7 snRNA-associ    | LSM11         | -0.9022 | -0.8123 | -0.8247 | -1.2842 | -1.1544 | -0.7027 | -0.8985 | -1.2102 | -0.8935 | -0.9482 |
| 476 | S-21_Q86UL  | Q86UU0 | B-cell CLL/lymph   | BCL9L DLNB    | 0.3456  | 0.1056  | 0.1566  | 0.0627  | -0.0307 | -0.0377 | 0.1220  | -0.0077 | 0.1933  | 0.0115  |
| 477 | S-21_Q8IUD  | Q8IUD2 | ELKS/Rab6-interc   | ERC1 ELKS K   | -0.8655 | -0.5597 | -1.5396 | -0.9288 | -1.1179 | -1.3711 | -1.0624 | -1.4191 | -1.5681 | -1.4232 |
| 478 | S-21_Q9Y4F  | Q9Y4F9 | Rho family-interc  | RIPOR2 C6o    | -0.7684 | -0.7064 | -0.6781 | -0.5963 | -0.9719 | -0.8487 | -0.6261 | -0.9828 | -0.9226 | -0.8285 |
| 479 | S-210_P783  | P78347 | General transcrip  | GTF2I BAP1    | -0.6151 | -0.8618 | -0.8566 | -0.9154 | -0.6138 | -1.0240 | -0.7491 | -0.8547 | -0.7707 | -0.9657 |
| 480 | S-210_Q9NZ  | Q9NZM3 | Intersectin-2 (SH  | ITSN2 KIAA1   | 0.2208  | -0.0541 | 0.0413  | 0.0627  | 0.0569  | 0.1749  | -0.2457 | 0.0362  | -0.0941 | -0.0339 |
| 481 | S-210_Q9UE  | Q9UBB9 | Tuftelin-interacti | TFIP11 STIP   | 0.4602  | 0.3259  | 0.4493  | 0.1736  | 0.1676  | 0.3191  | 0.2008  | 0.3646  | 0.4089  | 0.5172  |
| 482 | S-2102_Q01  | Q01082 | Spectrin beta ch   | SPTBN1 SPTI   | 1.0654  | 1.1005  | 1.0494  | 1.3754  | 1.4374  | 1.4548  | 1.2127  | 1.4336  | 1.7429  | 1.7744  |
| 483 | S-211_O003  | O00308 | NEDD4-like E3 ut   | WWP2          | -1.1206 | -1.0189 | -1.1476 | -1.0488 | -1.2172 | -1.1871 | -0.8392 | -0.9284 | -1.4391 | -1.5531 |
| 484 | S-211_O954  | O95466 | Formin-like prote  | FMNL1 C17c    | -2.4905 | -2.0212 | -0.3772 | -1.1167 | -0.2497 | -1.5425 | -0.2643 | -1.3319 | -1.2540 | -1.4267 |
| 485 | S-211_Q132  | Q13242 | Serine/arginine-r  | SRSF9 SFRS9   | -2.0553 | -1.8241 | -2.6082 | -2.3326 | -2.6138 | -2.4380 | -2.0569 | -2.3128 | -2.0170 | -2.0917 |
| 486 | S-211_Q8TF  | Q8TF01 | Arginine/serine-r  | PNISR C6orf   | 0.5741  | 0.5502  | 0.8576  | 0.6402  | 0.7817  | 0.8967  | 0.7129  | 0.7275  | 0.9073  | 0.9342  |
| 487 | S-212_Q96B  | Q96B36 | Proline-rich AKT1  | AKT1S1 PRA    | 0.0180  | 0.0744  | 0.0981  | 0.3223  | -0.0139 | 0.1643  | 0.0820  | 0.0788  | -0.0871 | 0.0179  |
| 488 | S-212_Q9UF  | Q9UFC0 | Leucine-rich rep   | LRWD1 CEN     | 1.5832  | 1.7739  | 1.3802  | 1.4463  | 1.5200  | 1.6279  | 0.9261  | 0.9053  | 1.8023  | 1.5020  |
| 489 | S-2128_Q01  | Q01082 | Spectrin beta ch   | SPTBN1 SPTI   | 0.1163  | 0.1230  | 0.1481  | 0.0897  | 0.1560  | 0.2655  | 0.2639  | 0.3158  | 0.6214  | 0.6590  |
| 490 | S-213_Q6NY  | Q6NYC8 | Phostensin (Prot   | PPP1R18 HK    | -1.3502 | -1.1652 | 0.5617  | 0.8142  | 0.2901  | 0.7292  | 0.4283  | 0.7513  | 0.2001  | 0.2171  |
| 491 | S-213_Q928  | Q92882 | Osteoclast-stimu   | OSTF1         | -0.1830 | -0.3042 | -0.2670 | -0.4266 | -0.5451 | -0.4007 | -0.5839 | -0.4995 | -0.6795 | -1.0722 |
| 492 | S-2132_Q9U  | Q9UQ35 | Serine/arginine r  | SRRM2 KIAA    | -0.0520 | -0.2000 | -0.2539 | -0.4168 | -0.1615 | -0.0730 | -0.2719 | -0.0862 | -0.2623 | -0.1420 |
| 493 | S-214_O608  | O60841 | Eukaryotic transl  | EIF5B IF2 KIA | -0.2394 | -0.4990 | 0.9741  | 0.9354  | 0.8167  | 1.0619  | 0.6356  | 0.9061  | 0.9402  | 0.7305  |
| 494 | S-214_Q137  | Q13761 | Runt-related trar  | RUNX3 AML     | -0.6318 | -0.2522 | -0.2522 | -0.1597 | -0.1219 | -0.1113 | -0.3412 | -0.0262 | -0.3158 | -0.3072 |
| 495 | S-214_Q6ZV  | Q6ZVF9 | G protein-regula   | GPRIN3 KIAA   | -0.7948 | -0.8518 | -0.9526 | -0.9806 | -1.1381 | -0.8720 | -0.9477 | -1.1345 | -1.4320 | -1.3264 |
| 496 | S-214_Q9H1  | Q9H1E3 | Nuclear ubiquito   | NUCKS1 NU     | 0.2224  | 0.2808  | 0.3440  | 0.5856  | 0.6600  | 0.6480  | 0.4215  | 0.6546  | 0.6947  | 0.6816  |
| 497 | S-215_P498  | P49841 | Glycogen syntha    | GSK3B         | -0.2287 | -0.1677 | -0.5595 | -0.6056 | -0.6194 | -0.5820 | -0.6935 | -0.4946 | -0.7730 | -0.6129 |
| 498 | S-215_Q145  | Q14558 | Phosphoribosyl     | PRPSAP1       | -0.5135 | -0.5994 | -0.6735 | -1.0899 | -0.2829 | -0.5403 | -0.6582 | -0.5317 | -0.3436 | -0.1910 |
| 499 | S-2152_P21  | P21333 | Filamin-A (FLN-A   | FLNA FLN FL   | 0.8863  | 0.8890  | 1.0187  | 1.1276  | 0.8710  | 0.9858  | 0.9592  | 1.1174  | 0.6963  | 0.7459  |
| 500 | S-216_Q6JB  | Q6JBY9 | CapZ-interacting   | RCS1 CAPZ     | -0.1952 | -0.3294 | -0.0774 | -0.1637 | -0.0688 | 0.0192  | -0.1106 | -0.0450 | -0.4216 | -0.6814 |
| 501 | S-216_Q8NE  | Q8ND56 | Protein LSM14 h    | LSM14A C19    | 0.8079  | 0.8192  | 0.6795  | 0.6527  | 0.8198  | 0.6678  | 0.8732  | 0.7440  | 0.7956  | 0.5759  |
| 502 | S-216_Q9UK  | Q9UKV3 | Apoptotic chrom    | ACIN1 ACINI   | 0.6996  | 0.6439  | 0.5582  | 0.8833  | 0.5981  | 0.4586  | 0.7302  | 0.7675  | 0.5033  | 0.5250  |
| 503 | S-2169_Q01  | Q01082 | Spectrin beta ch   | SPTBN1 SPTI   | -0.1829 | -0.0692 | 0.1697  | 0.1772  | 0.3763  | 0.3213  | 0.2487  | 0.2696  | 0.8001  | 0.6792  |
| 504 | S-217_Q047  | Q04726 | Transducin-like e  | TLE3 KIAA15   | -0.2275 | -0.3340 | -0.0989 | -0.1576 | 0.0486  | -0.1357 | -0.1130 | 0.1476  | -0.3069 | -0.1852 |
| 505 | S-217_Q96F  | Q96F15 | GTPase IMAP fan    | GIMAP5 IAN    | -0.6229 | -0.5369 | -0.8716 | -0.7084 | -0.7161 | -0.3608 | -0.4305 | -0.4690 | -0.8733 | -0.6328 |
| 506 | S-218_Q150  | Q15019 | Septin-2 (Neural   | SEPTIN2 DIF   | -0.0723 | 0.3485  | -0.3068 | 0.2463  | 0.0192  | 0.2680  | 0.4293  | 0.4716  | 0.2226  | -0.0971 |



|     |            |        |                        |               |         |         |         |         |         |         |         |         |         |         |
|-----|------------|--------|------------------------|---------------|---------|---------|---------|---------|---------|---------|---------|---------|---------|---------|
| 507 | S-218_Q5VV | Q5VVJ2 | Histone H2A deu        | MYSM1 KIAA    | 0.7755  | 0.9601  | 0.0923  | 0.2145  | 0.4086  | -0.0670 | 0.4804  | 0.0152  | 0.0155  | 0.0368  |
| 508 | S-219_Q9BV | Q9BVG6 | Sodium channel         | SCNM1         | 0.1815  | 0.1973  | -0.1511 | -0.5037 | -0.5970 | -0.5490 | -0.5122 | -0.5789 | -0.1814 | 0.0654  |
| 509 | S-220_Q96P | Q96PK6 | RNA-binding pro        | RBM14 SIP     | -1.8010 | -2.0808 | -1.8699 | -1.5814 | -1.5970 | -1.7320 | -1.6379 | -1.5789 | -1.7357 | -1.4939 |
| 510 | S-221_Q954 | Q95425 | Supervillin (Arch      | SVIL          | -2.1404 | -2.2183 | -1.6735 | -1.8434 | -1.8129 | -1.4340 | -2.0196 | -1.8996 | -1.3736 | -1.5049 |
| 511 | S-221_Q7Z2 | Q7Z2W4 | Zinc finger CCCH       | ZC3HAV1 ZC    | -0.4381 | -0.6681 | -0.8266 | -0.7748 | -0.8791 | -0.5798 | -0.5611 | -0.7846 | -0.8719 | -0.9682 |
| 512 | S-221_Q7Z5 | Q7Z5K2 | Wings apart-like       | WAPL FOE K    | -0.1030 | -0.3032 | 0.7099  | 0.7071  | 0.6150  | 0.6308  | 0.6103  | 0.6729  | 0.8362  | 0.8403  |
| 513 | S-222_Q7L4 | Q7L4I2 | Arginine/serine-r      | RSRC2         | -2.2652 | -2.4528 | -1.4511 | -1.4252 | -1.4439 | -1.3444 | -1.7867 | -1.1446 | -1.3635 | -0.8874 |
| 514 | S-222_Q8IZ | Q8IZP0 | Abl interactor 1 (     | ABI1 SSH3BF   | -2.1808 | -1.4228 | 0.2074  | 0.0524  | 0.2627  | -0.3807 | 0.3772  | 0.1753  | -0.2022 | -0.1837 |
| 515 | S-222_Q9NY | Q9NYF8 | Bcl-2-associated       | BCLAF1 BTF    | 0.4483  | 0.4643  | -0.0154 | 0.3584  | 0.2300  | -0.1903 | 0.1530  | -0.1103 | 0.3084  | 0.6980  |
| 516 | S-2229_Q9B | Q9BV73 | Centrosome-assc        | CEP250 CEP    | -0.8042 | -0.7164 | -0.9048 | -0.6246 | -0.7589 | -0.9190 | -0.8840 | -0.7304 | -0.8862 | -0.8732 |
| 517 | S-223_Q166 | Q16629 | Serine/arginine-r      | SRSF7 SFRS7   | -2.1808 | -1.8398 | 0.3717  | 0.2099  | 0.1344  | 0.1762  | 0.5914  | 0.6652  | 0.8326  | 0.8068  |
| 518 | S-224_Q435 | Q43561 | Linker for activat     | LAT           | 2.0392  | 1.9165  | 0.9369  | 1.1693  | 1.3728  | 1.1178  | 1.5579  | 1.1611  | 0.9334  | 0.6671  |
| 519 | S-224_Q753 | Q75376 | Nuclear receptor       | NCOR1 KIAA    | 0.1671  | 0.2241  | 0.1575  | 0.0524  | -0.0863 | 0.2518  | 0.0283  | 0.0961  | 0.2880  | -0.0726 |
| 520 | S-224_P118 | P11831 | Serum response         | SRF           | -0.7485 | -0.8638 | -0.4454 | -0.5113 | -0.8390 | -0.4893 | -0.7823 | -0.5630 | -0.2981 | 0.0242  |
| 521 | S-224_Q135 | Q13573 | SNW domain-cor         | SNW1 SKIIP    | -0.4406 | -0.2923 | -0.3055 | -0.1818 | -0.1585 | -0.2980 | 0.0771  | -0.1178 | -0.5585 | -0.3088 |
| 522 | S-225_Q150 | Q15052 | Rho guanine nuc        | ARHGEF6 CC    | 1.9076  | 1.7935  | 1.8972  | 2.1870  | 1.7613  | 1.7712  | 2.0635  | 2.0425  | 1.2458  | 1.2059  |
| 523 | S-225_Q8IZ | Q8IZP0 | Abl interactor 1 (     | ABI1 SSH3BF   | -1.7823 | -1.3589 | -1.7141 | -1.7094 | -1.4691 | -1.5687 | -1.2566 | -1.6065 | -1.7976 | -1.6149 |
| 524 | S-226_P082 | P08238 | Heat shock prote       | HSP90AB1 H    | 0.1425  | 0.8892  | 0.5727  | 0.5384  | 0.5445  | 0.3779  | 0.6822  | 0.2968  | 0.5226  | 0.7447  |
| 525 | S-226_P172 | P17252 | Protein kinase C       | PRKCA PKCA    | -0.2587 | -0.2055 | -0.4032 | -0.3126 | 0.0515  | 0.2100  | -0.1162 | -0.2442 | 0.0723  | 0.0356  |
| 526 | S-226_Q084 | Q08495 | Dematin (Demati        | DMTN DMT      | -1.0292 | -1.4195 | -0.9773 | -1.1286 | -0.5492 | -0.5708 | -1.2746 | -1.1339 | -1.4271 | -1.6167 |
| 527 | S-227_Q602 | Q60256 | Phosphoribosyl $\zeta$ | PRPSAP2       | -0.8475 | -0.8020 | -0.8503 | -1.0020 | -0.9993 | -0.7550 | -0.7770 | -0.7741 | -0.4571 | -0.2750 |
| 528 | S-227_P527 | P52701 | DNA mismatch re        | MSH6 GTBP     | 0.3183  | 0.1671  | -0.0642 | 0.1145  | 0.4630  | 0.2342  | 0.0039  | 0.1699  | 0.2816  | 0.2379  |
| 529 | S-227_Q53G | Q53GL0 | Pleckstrin homol       | PLEKHO1 CK    | -1.2479 | -1.0808 | -0.7954 | -0.7299 | -0.6451 | -0.2690 | -0.7711 | -0.4356 | -0.9178 | -0.6407 |
| 530 | S-227_Q9BV | Q9BW71 | HIRA-interacting       | HIRIP3        | -0.3595 | -0.2378 | -0.3316 | -0.4444 | -0.3611 | -0.2636 | -0.3561 | -0.3185 | -0.3271 | -0.2679 |
| 531 | S-2272_Q9U | Q9UQ35 | Serine/arginine r      | SRRM2 KIAA    | -1.2266 | -1.2183 | -1.1453 | -1.5761 | -1.3754 | -1.4542 | -1.3931 | -1.2569 | -1.1521 | -1.2358 |
| 532 | S-228_Q1KN | Q1KMD3 | Heterogeneous r        | HNRNPUL2 I    | 0.7617  | 1.5813  | 1.2024  | 0.8482  | 0.8619  | 0.9646  | 0.7450  | 0.7648  | 0.9477  | 1.0406  |
| 533 | S-228_Q6P4 | Q6P4R8 | Nuclear factor re      | NFRKB INO8    | 0.5434  | 0.4646  | 0.7176  | 0.7060  | 0.8229  | 0.6163  | 0.6489  | 0.4694  | 0.5565  | 0.7321  |
| 534 | S-228_Q86Y | Q86YV0 | RAS protein activ      | RASAL3        | -0.2674 | -0.5116 | -0.8229 | -0.5761 | -0.4068 | -0.9823 | -0.6460 | -0.9727 | -0.9007 | -0.5419 |
| 535 | S-228_Q8NE | Q8NE71 | ATP-binding cass       | ABCF1 ABC5    | -0.6572 | -0.8091 | -0.1971 | -0.4787 | -0.5079 | -0.8424 | -0.4684 | -0.8223 | -0.5226 | -0.7818 |
| 536 | S-229_Q130 | Q13033 | Striatin-3 (Cell       | cy STRN3 GS2N | 0.0392  | 0.0828  | 0.1716  | 0.2448  | -0.0065 | 0.1184  | -0.0994 | -0.0482 | 0.2192  | 0.2466  |
| 537 | S-229_Q96P | Q96P48 | Arf-GAP with Rho       | ARAP1 CENT    | -1.9191 | -1.7002 | -2.1757 | -1.8498 | -2.0065 | -1.6787 | -2.0953 | -2.1615 | -1.8766 | -1.7383 |
| 538 | S-23_Q926  | Q92619 | Rho GTPase-activ       | ARHGAP45 I    | 1.4780  | 1.4829  | 0.6815  | 0.9548  | 0.8690  | 0.7629  | 0.8718  | 0.8282  | 0.7858  | 0.6549  |
| 539 | S-23_Q9NSI | Q9NSI8 | SAM domain-cor         | SAMSN1 HA     | 0.5655  | 0.7009  | 0.1147  | -0.1518 | 0.1610  | -0.5124 | 0.2009  | -0.5251 | -0.5856 | -0.7974 |
| 540 | S-230_Q7Z4 | Q7Z417 | Nuclear fragile X      | NUFIP2 KIAA   | 0.5359  | 0.2002  | 1.1334  | 0.5879  | 1.0037  | 1.0418  | 1.0187  | 0.9823  | 1.0391  | 0.7110  |
| 541 | S-230_Q96B | Q96B97 | SH3 domain-coni        | SH3KBP1 CIM   | 0.6707  | 0.6670  | 0.7198  | 1.2832  | 0.8943  | 0.4360  | 0.8350  | 0.6292  | -0.4452 | -0.4667 |
| 542 | S-230_Q96S | Q96S82 | Ubiquitin-like pro     | UBL7 BMSCI    | -0.5581 | -0.8241 | -0.7755 | -0.9841 | -0.8097 | -0.6067 | -0.9328 | -0.6805 | -0.8695 | -0.8268 |
| 543 | S-231_P017 | P01732 | T-cell surface gly     | CD8A MAL      | -0.8622 | -1.1627 | 1.9805  | 0.8263  | 1.8584  | -0.6668 | 2.5122  | 0.8030  | -0.1652 | -0.3476 |
| 544 | S-231_P079 | P07900 | Heat shock prote       | HSP90AA1 H    | -0.1305 | 0.8354  | 0.4581  | 0.2037  | 0.5296  | 0.0497  | 0.6547  | -0.0231 | 0.1506  | 0.9335  |
| 545 | S-231_P226 | P22626 | Heterogeneous r        | HNRNPA2B1     | -1.7454 | -1.6334 | -1.0190 | -0.7477 | -1.1259 | -1.2145 | -0.9704 | -1.1178 | -1.0409 | -0.8521 |

|     |             |        |                    |                |         |         |         |         |         |         |         |         |         |         |
|-----|-------------|--------|--------------------|----------------|---------|---------|---------|---------|---------|---------|---------|---------|---------|---------|
| 546 | S-231_Q130  | Q13009 | T-lymphoma inva    | TIAM1          | -1.0441 | -0.9857 | -0.2485 | -0.4713 | -0.2086 | -0.0890 | -0.7125 | -0.6371 | -0.7184 | -0.7490 |
| 547 | S-231_Q4VX  | Q4VX76 | Synaptotagmin-li   | SYTL3 SLP3     | -0.2982 | -0.5794 | -0.3055 | -0.0324 | -0.2874 | -0.3238 | -0.1928 | -0.0980 | -0.5301 | -0.3925 |
| 548 | S-231_Q8IZf | Q8IZP0 | Abl interactor 1 ( | ABI1 SSH3BF    | -1.3971 | -1.3225 | -0.6486 | -0.7123 | -0.2941 | -0.9303 | -0.3249 | -0.6182 | -1.1150 | -0.9457 |
| 549 | S-232_P273  | P27348 | 14-3-3 protein th  | YWHAQ          | 1.2515  | 1.1725  | 0.5773  | 0.8010  | 0.3918  | 0.3670  | 0.5521  | 0.4438  | 0.2315  | 0.2281  |
| 550 | S-232_P356  | P35659 | Protein DEK        | DEK            | 0.8355  | 0.5993  | 0.5207  | 0.4213  | 0.6612  | 0.7283  | 0.3561  | 0.7173  | 0.4270  | 0.4487  |
| 551 | S-232_Q9UJ  | Q9UJU6 | Drebrin-like prot  | DBNL CMAP      | -0.2015 | -0.5147 | -0.5549 | -0.3371 | -0.5612 | -0.4706 | -0.6830 | -0.5562 | -0.2524 | -0.3757 |
| 552 | S-2322_Q9B  | Q9BV73 | Centrosome-assc    | CEP250 CEP     | -0.6773 | -0.8027 | -0.4171 | -0.4737 | -0.4117 | -0.8133 | -0.6582 | -0.5996 | -0.7685 | -0.8544 |
| 553 | S-233_O960  | O96019 | Actin-like proteir | ACTL6A BAF     | 0.4531  | 0.3106  | 0.6962  | 0.6851  | 0.7765  | 0.8229  | 0.6090  | 0.7188  | 0.9459  | 0.5834  |
| 554 | S-233_P079  | P07910 | Heterogeneous r    | HNRNPC HN      | 1.6452  | 1.8291  | 0.7287  | 0.7619  | 0.8999  | 0.4950  | 1.0024  | 0.7922  | 0.6969  | 0.7303  |
| 555 | S-233_Q166  | Q16629 | Serine/arginine-r  | SRSF7 SFRS7    | -0.4187 | -0.6112 | 0.4778  | 0.6414  | 1.0364  | 0.6299  | 0.9192  | 1.0694  | 1.1162  | 1.5423  |
| 556 | S-234_Q435  | Q43516 | WAS/WASL-inter     | WIPF1 WASI     | 0.1607  | 0.3432  | 0.6411  | 0.8620  | 0.5773  | 0.0497  | 1.2688  | 0.6082  | 0.4951  | 0.3165  |
| 557 | S-234_Q9H1  | Q9H1E3 | Nuclear ubiquito   | NUCKS1 NU      | 0.1146  | 0.0713  | 0.5610  | 0.1357  | 0.4869  | -0.1209 | -0.1304 | -0.3454 | 0.7873  | 1.0368  |
| 558 | S-234_Q9H7  | Q9H7L9 | Sin3 histone dea   | SUDS3 SAP4     | -1.1484 | -0.8300 | -1.4227 | -0.9187 | -1.7434 | -1.4340 | -1.2535 | -1.7228 | -1.3974 | -1.1648 |
| 559 | S-236_O757  | O75791 | GRB2-related ad    | GRAP2 GAD      | -1.4213 | -1.5663 | -1.2937 | -1.6443 | -1.2740 | -1.0810 | -1.4765 | -1.0981 | -1.1020 | -1.0821 |
| 560 | S-236_P226  | P22626 | Heterogeneous r    | HNRNPA2B1      | -0.8010 | -1.1455 | -0.8359 | -0.8855 | -0.6860 | -1.2110 | -0.3396 | -0.4294 | -1.0899 | -0.9987 |
| 561 | S-236_Q6Y7  | Q6Y7W6 | GRB10-interactir   | GIGYF2 KIAA    | 0.8303  | 0.9034  | 1.0664  | 1.0228  | 0.9571  | 1.0452  | 0.8944  | 0.9265  | 0.8968  | 0.8345  |
| 562 | S-237_Q86T  | Q86TI0 | TBC1 domain fan    | TBC1D1 KIAA    | 0.0602  | 0.0995  | 0.2546  | 0.1260  | -0.0102 | 0.3589  | 0.1374  | 0.1699  | 0.1198  | -0.1433 |
| 563 | S-237_Q9BT  | Q9BTK6 | PAXIP1-associate   | PAGR1 C16c     | -1.8329 | -1.7969 | -2.2385 | -2.1637 | -2.2651 | -2.1871 | -2.1751 | -2.5251 | -2.1493 | -2.0484 |
| 564 | S-237_Q9HC  | Q9HCU9 | Breast cancer me   | BRMS1          | -1.4603 | -1.6717 | -1.2509 | -0.8594 | -1.0630 | -1.4061 | -1.1693 | -1.2496 | -1.0927 | -0.8521 |
| 566 | S-2384_P02  | P02751 | Fibronectin (FN)   | FN1 FN         | -0.4336 | -0.9294 | -0.6606 | -0.4338 | -0.4757 | 0.0486  | 0.2225  | 0.0843  | -0.5107 | -0.5896 |
| 567 | S-239_P518  | P51858 | Hepatoma-deriv     | HDGF HMG1      | -0.5213 | -0.4007 | -1.3489 | -1.5550 | -1.1750 | -1.1939 | -1.0651 | -1.1684 | -1.0652 | -1.0168 |
| 568 | S-239_Q66P  | Q66PJ3 | ADP-ribosylation   | ARL6IP4        | -0.0292 | -0.0438 | -0.4046 | -0.5867 | -0.5290 | -0.3711 | -0.4792 | -0.6562 | -0.3939 | -0.7085 |
| 569 | S-24_P3324  | P33241 | Lymphocyte-spei    | LSP1 WP34      | -1.6402 | -1.3253 | -1.6470 | -2.3598 | -1.9917 | -2.2565 | -1.7513 | -2.2460 | -2.0223 | -1.6228 |
| 570 | S-24_Q1543  | Q15435 | Protein phospho    | PPP1R7 SDS     | -0.3641 | -0.2937 | -0.2250 | -0.0287 | -0.0630 | -0.3634 | 0.2267  | -0.2643 | -0.2493 | -0.2571 |
| 571 | S-24_Q8IV5  | Q8IV50 | LysM and putativ   | LYSMD2         | -1.2739 | -1.4228 | -0.3717 | -0.2755 | -0.3682 | -0.3539 | -0.6399 | -0.5185 | -0.4784 | -0.3120 |
| 572 | S-24_Q9Y2I  | Q9Y2I8 | WD repeat-cont     | WDR37 KIAA     | -3.2827 | -3.0347 | -2.7917 | -2.8434 | -2.6026 | -3.7926 | -2.9082 | -3.0000 | -3.2696 | -3.7555 |
| 573 | S-240_Q6IQ  | Q6IQ19 | Centriole, cilia   | ar CCSAP C1orf | -0.4779 | -0.0473 | 0.1424  | 0.6242  | 0.9982  | 0.6173  | 0.6280  | 0.7630  | 0.2901  | 0.4768  |
| 574 | S-240_Q7Z5  | Q7Z5L9 | Interferon regula  | IRF2BP2        | -2.6179 | -2.2815 | -2.4116 | -1.9356 | -2.0515 | -2.1603 | -2.1120 | -1.9638 | -1.8250 | -1.7686 |
| 575 | S-240_Q8W   | Q8WU79 | Stromal membra     | SMAP2 SMA      | -0.5501 | -0.4696 | -0.9265 | -0.9666 | -0.4948 | -0.2654 | -0.5727 | -0.3689 | -0.3535 | -0.5760 |
| 576 | S-240_Q9H1  | Q9H1E3 | Nuclear ubiquito   | NUCKS1 NU      | -2.2915 | -2.4959 | -3.0796 | -2.1400 | -2.0981 | -3.3673 | -2.4311 | -2.4397 | -2.7487 | -2.2418 |
| 577 | S-2409_P11  | P11717 | Cation-independ    | IGF2R MPRI     | 0.4774  | 0.5653  | 0.2893  | 0.3685  | 0.1903  | 0.2203  | 0.3812  | 0.4438  | 0.0956  | 0.2925  |
| 578 | S-241_Q149  | Q14979 | Heterogeneous r    | HNRNPD L H     | -0.5058 | -0.2951 | -0.7827 | -0.5948 | -0.5970 | -0.1636 | -0.6118 | -0.3650 | -0.2187 | -0.4493 |
| 579 | S-241_Q015  | Q01543 | Friend leukemia    | FLI1           | 0.4787  | 0.5197  | 0.3685  | 0.2848  | 0.3433  | 0.4748  | 0.3346  | 0.5478  | 0.4154  | -0.0712 |
| 580 | S-242_Q5T2  | Q5T200 | Zinc finger CCCH   | ZC3H13 KIAA    | 1.6171  | 1.6368  | 1.5940  | 1.6890  | 1.3214  | 1.6565  | 1.4379  | 1.5961  | 1.6850  | 1.3905  |
| 581 | S-242_Q9UI  | Q9UI08 | Ena/VASP-like pr   | EVL RNB6       | -0.6890 | -0.3266 | -0.5955 | -0.8789 | -1.0401 | -0.6249 | -0.4883 | -0.5428 | -0.3854 | -0.7974 |
| 582 | S-2426_Q9U  | Q9UQ35 | Serine/arginine r  | SRRM2 KIAA     | -0.5742 | -0.8578 | 0.1185  | -0.1032 | 0.0710  | 0.0824  | -0.1504 | -0.0325 | 0.1222  | 0.2639  |
| 583 | S-243_P208  | P20810 | Calpastatin (Calp  | CAST           | 0.6578  | 0.5358  | 0.4327  | 0.2921  | 0.3848  | 0.2985  | 0.3479  | 0.3712  | -0.6393 | -0.6488 |
| 584 | S-243_Q53C  | Q53QZ3 | Rho GTPase-activ   | ARHGAP15 E     | -1.8148 | -0.8105 | -0.6530 | -0.6232 | -0.4214 | -0.3622 | -0.4822 | -0.3703 | -0.6184 | -0.7293 |
| 585 | S-243_Q928  | Q92835 | Phosphatidylinos   | INPP5D SHIF    | 0.6534  | 0.5006  | 0.2660  | 0.2823  | 0.1501  | 0.5996  | 0.4516  | 0.4606  | 0.1575  | 0.2310  |

|     |             |        |                     |             |         |         |         |         |         |         |         |         |         |         |
|-----|-------------|--------|---------------------|-------------|---------|---------|---------|---------|---------|---------|---------|---------|---------|---------|
| 586 | S-243_Q9UK  | Q9UKV3 | Apoptotic chrom     | ACIN1 ACINI | 0.5031  | 0.6754  | 0.8243  | 0.0897  | 0.3258  | 0.0236  | 0.4494  | 0.1713  | 0.3382  | 0.3522  |
| 587 | S-243_Q9Y2  | Q9Y2W1 | Thyroid hormon      | THRAP3 BCL  | -0.9426 | -0.7666 | -1.2250 | -1.1680 | -1.0859 | -1.2067 | -0.9756 | -0.9161 | -1.2812 | -1.3332 |
| 588 | S-245_Q438  | Q43815 | Striatin            | STRN        | -0.2303 | -0.2308 | 0.1520  | 0.1794  | -0.2292 | 0.0188  | -0.2373 | -0.1099 | -0.0468 | -0.0193 |
| 589 | S-245_Q954  | Q95425 | Supervillin (Arch   | SVIL        | 0.8345  | 0.7616  | 0.9693  | 0.7804  | 1.0814  | 1.2894  | 1.0585  | 0.9343  | 0.9246  | 0.5845  |
| 590 | S-247_Q8NE  | Q8NB78 | Lysine-specific hi  | KDM1B AOF   | 0.5813  | 0.7550  | 0.6802  | 0.7711  | 0.5871  | 0.7690  | 0.7673  | 0.7275  | 0.8983  | 0.5854  |
| 591 | S-247_Q9H3  | Q9H3N1 | Thioredoxin-rela    | TMX1 TMX1   | 0.5782  | 0.6038  | -0.4902 | 0.0613  | -0.6116 | -0.5742 | 0.0673  | -0.3771 | -1.1066 | -0.9545 |
| 592 | S-248_P139  | P13984 | General transcrip   | GTF2F2 RAP  | -1.7394 | -0.6095 | -0.3636 | -0.1302 | -0.0420 | -0.2636 | -0.2033 | -0.1979 | -0.3685 | -0.2633 |
| 593 | S-248_Q9BR  | Q9BRD0 | BUD13 homolog       | BUD13       | -2.5213 | -1.6541 | -1.5245 | -1.3237 | -1.2784 | -1.5082 | -1.2879 | -1.4397 | -1.5915 | -1.4759 |
| 594 | S-248_Q9Y2  | Q9Y2W1 | Thyroid hormon      | THRAP3 BCL  | 0.1799  | 0.1857  | 0.5061  | 0.7191  | 0.6150  | 0.3785  | 0.6356  | 0.7348  | 0.6009  | 0.5551  |
| 595 | S-2484_P11  | P11717 | Cation-independ     | IGF2R MPRI  | -0.2674 | -0.0416 | -0.2311 | -0.3921 | -0.6509 | -0.6906 | -0.5402 | -0.2569 | -0.3652 | -0.2464 |
| 596 | S-2498_Q12  | Q12802 | A-kinase anchor     | AKAP13 BRX  | 0.3766  | 0.2260  | 1.4489  | 1.6419  | 1.3756  | 1.4822  | 1.8718  | 1.6585  | 1.0705  | 1.2601  |
| 597 | S-25_P1694  | P16949 | Stathmin (Leuke     | STMN1 C1or  | -0.2140 | -0.2443 | 0.5575  | 0.3505  | 0.3243  | 0.6873  | 0.4683  | 0.4325  | 0.5618  | 0.7055  |
| 598 | S-25_Q9NYL  | Q9NYL9 | Tropomodulin-3      | TMOD3       | 0.6963  | 0.8154  | 0.5024  | 0.4332  | 0.2364  | 0.6241  | 0.3772  | 0.3993  | 0.6737  | 0.3723  |
| 599 | S-250_P257  | P25788 | Proteasome sub      | PSMA3 HC8   | 1.4657  | 1.3084  | 0.9330  | 0.6885  | 1.0996  | 1.0425  | 1.1082  | 1.3323  | 1.0232  | 0.9987  |
| 600 | S-250_P293  | P29350 | Tyrosine-protein    | PTPN6 HCP I | -0.1605 | -0.2762 | -0.4340 | -0.1657 | -0.5343 | -0.3983 | -0.3023 | -0.4150 | -0.9527 | -1.0220 |
| 601 | S-250_P576  | P57682 | Kruempel-like fac   | KLF3 BKLF   | 0.1979  | 0.3902  | 0.0219  | 0.1327  | -0.1502 | -0.1809 | -0.0119 | -0.1024 | -0.0893 | -0.0917 |
| 602 | S-250_Q9UE  | Q9UBI9 | Headcase protei     | HECA HDC    | -2.8458 | -2.8241 | -1.8931 | -2.2373 | -1.9627 | -2.1405 | -2.1290 | -1.6019 | -2.0329 | -2.2479 |
| 603 | S-252_P332  | P33241 | Lymphocyte-spe      | LSP1 WP34   | 0.4134  | 0.3769  | 1.0611  | 0.5896  | 0.7970  | 0.5244  | 0.8934  | 0.7756  | 0.7092  | 0.5477  |
| 604 | S-252_Q3KC  | Q3KQU3 | MAP7 domain-cc      | MAP7D1 KIA  | -0.0329 | -0.2017 | -0.0179 | -0.0824 | -0.3447 | -0.1049 | -0.0856 | -0.0785 | -0.7999 | -0.7297 |
| 605 | S-253_Q155  | Q15541 | E3 ubiquitin-prot   | RNF113A RN  | -0.2209 | -0.3562 | -0.2068 | -0.2001 | -0.2970 | -0.2117 | -0.3011 | -0.3923 | -0.0803 | -0.2224 |
| 606 | S-254_Q8IX  | Q8IXT5 | RNA-binding pro     | RBM12B      | -1.8075 | -1.8592 | -1.4305 | -1.3404 | -1.2997 | -1.4562 | -1.5537 | -1.1997 | -1.4380 | -1.2769 |
| 607 | S-255_P082  | P08238 | Heat shock prote    | HSP90AB1 H  | 0.1558  | 0.8539  | 0.6133  | 0.5312  | 0.5636  | 0.3922  | 0.9578  | 0.4166  | 0.2600  | 0.5178  |
| 608 | S-255_P175  | P17535 | Transcription fac   | JUND        | 0.2711  | 0.2260  | 0.4397  | 0.1550  | 0.3890  | 0.5149  | 0.6052  | 0.7711  | 0.0091  | 0.2488  |
| 609 | S-255_Q9UE  | Q9UBC2 | Epidermal growt     | EPS15L1 EPS | -0.1108 | 0.1291  | -0.0479 | -0.0956 | -0.3215 | 0.0396  | -0.0104 | 0.0422  | -0.3174 | 0.0293  |
| 610 | S-256_Q96P  | Q96PK6 | RNA-binding pro     | RBM14 SIP   | -0.3923 | -0.1928 | -0.1349 | 0.0264  | -0.2497 | -0.0075 | 0.0270  | 0.3072  | -0.0598 | -0.0325 |
| 611 | S-256_Q9HE  | Q9HB58 | Sp110 nuclear bc    | SP110       | 1.4339  | 1.5820  | 0.7447  | 1.2863  | 1.1569  | 0.7541  | 1.4574  | 0.9542  | 0.5547  | 1.1209  |
| 612 | S-257_Q130  | Q13033 | Striatin-3 (Cell cy | STRN3 GS2N  | -1.2182 | -1.4228 | -0.2698 | -0.6192 | -0.5477 | -0.0670 | -0.7867 | -0.3071 | -0.2263 | -0.1605 |
| 613 | S-257_Q135  | Q13523 | Serine/threonine    | PRPF4B KIA  | -0.6318 | -0.5100 | 0.1716  | 0.5263  | 0.7138  | 0.2177  | -0.0209 | 0.1753  | -0.1278 | 0.5905  |
| 614 | S-257_Q135  | Q13586 | Stromal interact    | STIM1 GOK   | -0.1605 | -0.0611 | 0.3522  | 0.5665  | -0.1020 | -0.0423 | 0.4934  | 0.4097  | -0.1249 | -0.2882 |
| 615 | S-257_Q722  | Q722W4 | Zinc finger CCCH    | ZC3HAV1 ZC  | -1.4170 | -1.4546 | -1.5293 | -1.6455 | -1.7589 | -1.7406 | -1.5005 | -1.6065 | -1.8254 | -1.5361 |
| 616 | S-257_Q96P  | Q96PM5 | RING finger and     | RCHY1 ARNI  | -0.3296 | -0.2196 | -0.0447 | 0.0053  | 0.2946  | 0.3058  | 0.0359  | 0.1508  | -0.0611 | -0.0739 |
| 617 | S-2578_Q15  | Q15149 | Plectin (PCN) (PL   | PLEC PLEC1  | -5.9398 | -5.1382 | -2.3569 | -2.2799 | -2.3284 | -2.7823 | -1.8792 | -2.1684 | -3.5452 | -3.0325 |
| 618 | S-2581_Q9U  | Q9UQ35 | Serine/arginine r   | SRRM2 KIAA  | 1.3227  | 1.3662  | 1.4547  | 1.2709  | 1.2080  | 1.3184  | 1.2465  | 1.3158  | 1.2767  | 1.1600  |
| 619 | S-259_P226  | P22626 | Heterogeneous r     | HNRNPA2B1   | -1.5265 | -1.6129 | -1.0511 | -1.4541 | -1.3284 | -1.1372 | -1.7210 | -1.8492 | -1.5605 | -1.3690 |
| 620 | S-26_P6299  | P62995 | Transformer-2 pr    | TRA2B SFRS  | -0.8233 | -0.7183 | 0.3165  | 1.0098  | 0.4947  | 0.5730  | 0.6580  | 0.7977  | 1.0655  | 1.4553  |
| 621 | S-26_Q0113  | Q01130 | Serine/arginine-r   | SRSF2 SFRS2 | 1.6142  | 1.7823  | 0.9826  | 1.5556  | 0.9627  | 1.2368  | 1.4369  | 1.2492  | 0.7468  | 0.8701  |
| 622 | S-260_P079  | P07910 | Heterogeneous r     | HNRNPC HN   | 0.4326  | 1.1452  | -0.9833 | -1.0415 | -0.8656 | -1.2494 | -0.8985 | -1.1345 | -1.2172 | -0.9457 |
| 623 | S-260_Q63Z  | Q63ZY6 | Putative methylt    | NSUN5P2 N   | 1.2162  | 1.1567  | 1.4935  | 1.5689  | 1.5889  | 1.7484  | 1.6613  | 1.6671  | 1.6704  | 1.5841  |
| 624 | S-260_Q8IYE | Q8IYB3 | Serine/arginine r   | SRRM1 SRM   | 0.3612  | 0.3363  | 0.3505  | 0.3657  | 0.3214  | 0.4136  | 0.2267  | 0.6212  | 0.4783  | 0.3482  |

|     |                    |                                 |         |         |         |         |         |         |         |         |         |         |
|-----|--------------------|---------------------------------|---------|---------|---------|---------|---------|---------|---------|---------|---------|---------|
| 625 | S-260_Q9UK Q9UKL0  | REST corepressor RCOR1 KIAA     | -0.9964 | -1.0622 | -0.9628 | -1.0269 | -1.1100 | -1.1703 | -1.1008 | -1.0882 | -0.9755 | -1.6188 |
| 626 | S-261_O956 O95644  | Nuclear factor of NFATC1 NFA    | 0.6963  | 0.5809  | 0.8326  | 1.1764  | 1.3118  | 0.7682  | 0.9738  | 0.9916  | 0.8507  | 0.9903  |
| 627 | S-261_Q8IYE Q8IYB4 | PEX5-related pro PEX5L PEX5F    | -0.3093 | -0.1690 | 0.0834  | -0.1283 | -0.0824 | 0.1143  | -0.1562 | -0.0641 | 0.0723  | 0.2820  |
| 628 | S-261_Q9NZ Q9NZ63  | Telomere length C9orf78 HCA     | 1.1666  | 1.2170  | 0.5614  | 0.5626  | 0.6531  | 0.4319  | 0.5957  | 0.5049  | 0.5083  | 0.7722  |
| 629 | S-262_Q9Y5 Q9Y5B6  | PAX3- and PAX7- PAXBP1 C21      | -0.3995 | -0.4665 | -0.3731 | -0.6720 | -0.6138 | -0.9303 | -0.7667 | -0.6466 | -0.3854 | -0.5271 |
| 630 | S-263_P079I P07900 | Heat shock prote HSP90AA1 H     | 0.1046  | 0.7225  | 0.5891  | 0.5653  | 0.6066  | 0.5107  | 0.7703  | 0.7051  | 0.5758  | 0.8567  |
| 631 | S-263_P612I P61247 | 40S ribosomal pr RPS3A FTE1     | -0.3688 | -0.2896 | 0.3595  | -0.1558 | -0.2023 | 0.5640  | -0.1205 | 0.1004  | 0.3341  | 0.0166  |
| 632 | S-264_O958 O95817  | BAG family mole BAG3 BIS        | -0.0857 | -0.0268 | -0.6785 | -0.2520 | -0.5237 | -0.5753 | -0.3281 | -0.5720 | -0.0941 | -0.1027 |
| 633 | S-264_P279I P27987 | Inositol-trisphos ITPKB         | -0.5265 | -0.5370 | -0.7471 | -0.5655 | -0.8522 | -0.6434 | -0.6218 | -0.4818 | -0.6556 | -0.5569 |
| 634 | S-264_Q148 Q14865  | AT-rich interact ARID5B DESI    | -1.4703 | -1.6129 | -1.6339 | -2.0636 | -2.0824 | -2.3219 | -1.7125 | -1.7952 | -2.0329 | -2.1590 |
| 635 | S-2658_Q6K Q6KC79  | Nipped-B-like pr NIPBL IDN3 I   | -0.3049 | -0.3920 | -0.8585 | -0.6056 | -0.8423 | -0.8531 | -0.6582 | -0.8658 | -1.1235 | -0.6347 |
| 636 | S-266_Q150 Q15025  | TNFAIP3-interact TNIP1 KIAA0    | 1.4238  | 1.2237  | 1.5525  | 1.6796  | 1.8354  | 1.4721  | 1.9359  | 1.7000  | 1.6564  | 1.4703  |
| 637 | S-2672_Q6K Q6KC79  | Nipped-B-like pr NIPBL IDN3 I   | -2.7454 | -2.7329 | -4.3840 | -3.2373 | -3.0139 | -3.3983 | -3.0842 | -3.6159 | -4.0065 | -3.1881 |
| 638 | S-268_O958 O95831  | Apoptosis-induci AIFM1 AIF P    | 0.1345  | 0.2532  | -0.9567 | -0.2415 | -0.4389 | -0.4320 | -0.3119 | -0.7002 | -0.6909 | -0.8614 |
| 639 | S-268_Q9HC Q9H0J9  | Protein mono-Ac PARP12 ZC3      | -1.0666 | -1.2081 | -0.8100 | -0.9493 | -1.3100 | -0.9050 | -0.9254 | -0.8603 | -1.5759 | -1.4441 |
| 640 | S-268_Q9NX Q9NXV6  | CDKN2A-interact CDKN2AIP C      | -2.7454 | -2.4288 | 1.9717  | 1.3414  | 1.7008  | 2.2667  | 1.6993  | 2.1422  | 2.6451  | 2.3121  |
| 641 | S-268_Q9NY Q9NYF8  | Bcl-2-associated BCLAF1 BTF     | -1.3971 | -0.7740 | -1.3356 | -1.0053 | -1.2344 | -1.4260 | -1.0065 | -1.1857 | -1.4462 | -0.8898 |
| 642 | S-269_Q8N4 Q8N4C6  | Ninein (hNinein) NIN KIAA156    | -1.9398 | -1.7589 | -1.4829 | -1.3016 | -1.6831 | -1.2780 | -1.5103 | -1.4648 | -1.5528 | -1.4267 |
| 643 | S-27_O6067 O60678  | Protein arginine PRMT3 HRM      | -0.6262 | -0.6317 | -0.3094 | -0.6664 | -0.9343 | -0.7246 | -0.8961 | -0.7715 | -0.2949 | -0.3056 |
| 644 | S-27_P0673I P06733 | Alpha-enolase (E ENO1 ENO1I     | -0.5501 | -0.5354 | -0.7176 | -0.9053 | -0.7069 | -0.5167 | -0.7867 | -0.5339 | -0.3974 | -0.1027 |
| 645 | S-27_P4973I P49736 | DNA replication I MCM2 BM2I     | 1.0611  | 0.9366  | 0.6397  | 0.3209  | 0.0586  | 0.0838  | 0.5144  | 0.4348  | 0.5315  | 0.3812  |
| 646 | S-27_Q9252 Q92522  | Histone H1.10 (H H1-10 H1FX     | -0.0704 | -0.2470 | -0.4312 | -0.3326 | 0.3006  | -0.1049 | 0.1689  | 0.1494  | -0.6292 | -0.7106 |
| 647 | S-27_Q9Y3Z Q9Y3Z3  | Deoxynucleoside SAMHD1 MC       | -0.0109 | 0.0000  | -0.1769 | 0.0438  | -0.1300 | -0.1438 | -0.1290 | -0.2551 | -0.1521 | 0.0356  |
| 648 | S-2702_Q9U Q9UQ35  | Serine/arginine r SRRM2 KIAA NA |         | NA      | -2.3049 | -2.2862 | -3.2441 | -2.1810 | -2.6298 | -2.2698 | -1.9791 | -2.3990 |
| 649 | S-271_Q008 Q00839  | Heterogeneous r HNRNPU C1I      | -0.3433 | -0.3920 | -1.6275 | -1.5550 | -1.6538 | -0.5082 | -1.1576 | -0.6395 | -1.2052 | -1.0917 |
| 650 | S-271_Q9BR Q9BRD0  | BUD13 homolog BUD13             | -1.6290 | -1.1553 | -1.4255 | -1.4444 | -1.6082 | -1.4624 | -1.4666 | -1.7689 | -1.8910 | -1.3394 |
| 651 | S-271_Q9UC Q9UQ88  | Cyclin-dependen CDK11A CDC      | -0.2937 | -0.2735 | -1.2385 | -1.2248 | -1.2475 | -1.7320 | -1.1461 | -1.6586 | -1.3568 | -1.0299 |
| 652 | S-272_Q135 Q13501  | Sequestosome-1 SQSTM1 OR        | -0.0647 | -0.2119 | 0.2128  | -0.0544 | -0.1462 | 0.0119  | -0.2123 | -0.2244 | 0.1471  | 0.0580  |
| 653 | S-272_Q96D Q96D71  | RalBP1-associate REPS1          | 1.9428  | 2.0875  | 0.3382  | 1.1170  | 0.7104  | 1.2500  | 1.0071  | 0.8580  | 0.4624  | -0.0999 |
| 654 | S-272_Q9H7 Q9H7M9  | V-type immunog VSIR C10orf      | -2.7948 | -2.8319 | -2.7917 | -2.8056 | -2.5158 | -2.8238 | -2.2597 | -2.3204 | -3.4712 | -2.7297 |
| 655 | S-273_Q131 Q13148  | TAR DNA-binding TARDDBP TDF     | -0.1973 | -0.3350 | 0.3862  | 0.0846  | 0.1394  | 0.5232  | -0.0342 | 0.2747  | 0.2237  | 0.3979  |
| 656 | S-2739_Q6Z Q6ZNJ1  | Neurobeachin-li NBEAL2 KIA      | -1.0465 | -0.9248 | -0.3786 | -0.5771 | -0.6004 | -0.9304 | -0.6976 | -0.7028 | -1.1202 | -1.5550 |
| 657 | S-274_P170I P17010 | Zinc finger X-chr ZFX           | 0.3313  | 0.5419  | -0.8931 | -0.4987 | -0.6308 | -1.3866 | -0.5196 | -1.0031 | -1.1264 | -1.0971 |
| 658 | S-274_Q8N2 Q8N228  | Sex comb on mic SCML4           | -2.8329 | -2.8319 | -2.6146 | -2.7328 | -2.9273 | -2.9106 | -2.6747 | -2.7228 | -3.1150 | -3.1306 |
| 659 | S-275_O754 O75475  | PC4 and SFRS1-ir PSIP1 DFS70    | 0.0771  | 0.0312  | 0.2303  | 0.3985  | 0.2837  | 0.1643  | 0.2249  | 0.2521  | 0.3737  | 0.4850  |
| 660 | S-275_P143I P14317 | Hematopoietic li HCLS1 HS1      | -0.1128 | -0.1979 | -0.9669 | -0.5012 | -0.0515 | -0.6621 | 0.1184  | -0.4049 | -0.8181 | -0.5607 |
| 661 | S-275_Q7Z2 Q7Z2W4  | Zinc finger CCCH- ZC3HAV1 ZC    | -0.0164 | -0.0797 | 0.1678  | -0.1597 | -0.0766 | 0.0089  | 0.0039  | -0.0529 | 0.0142  | -0.4284 |
| 662 | S-275_Q9NF Q9NR45  | Sialic acid syntha NANS SAS     | 0.8253  | 1.1886  | 0.9634  | 1.2553  | 1.3721  | 1.4806  | 1.1730  | 1.3783  | 1.4159  | 1.3891  |
| 663 | S-275_Q9UJ Q9UJU6  | Drebrin-like prot DBNL CMAP     | 1.7408  | 1.8126  | 1.2833  | 0.9345  | 1.0806  | 1.4613  | 1.4389  | 1.4410  | 1.1162  | 0.8273  |

|     |             |        |                               |         |         |         |         |         |         |         |         |         |         |
|-----|-------------|--------|-------------------------------|---------|---------|---------|---------|---------|---------|---------|---------|---------|---------|
| 664 | S-276_P497  | P49757 | Protein numb ho NUMB C14o     | -0.6544 | -0.6334 | 0.6085  | 0.0897  | 0.3549  | -0.0285 | 0.2421  | 0.0672  | -0.0078 | -0.1040 |
| 665 | S-276_Q9NF  | Q9NRL3 | Striatin-4 (Zinedi STRN4 ZIN  | -0.8523 | -0.6966 | -0.9166 | -0.9187 | -0.9449 | -0.7295 | -0.9452 | -1.0340 | -0.7976 | -0.9961 |
| 666 | S-277_O751  | O75190 | DnaJ homolog su DNAJB6 HSI    | -0.4905 | -0.5483 | -0.4976 | -0.6083 | -0.3970 | -0.6480 | -0.2304 | -0.3968 | -0.7142 | -0.4441 |
| 667 | S-277_P025  | P02545 | Prelamin-A/C [Cl LMNA LMN1    | -1.3735 | -0.6403 | 0.3814  | 0.7405  | 0.3155  | -0.0392 | 0.6221  | 0.3981  | -0.9987 | -0.6528 |
| 668 | S-277_Q133  | Q13342 | Nuclear body prc SP140 LYSP1  | 0.1687  | -0.0416 | 1.0655  | 0.2906  | 0.5129  | -0.2780 | 0.3812  | -0.3166 | 0.7745  | 1.2510  |
| 669 | S-277_Q135  | Q13523 | Serine/threonine PRPF4B KIAA  | 0.2666  | 0.2998  | -0.0544 | -0.1777 | -0.1080 | -0.3539 | -0.2319 | -0.6182 | -0.4233 | 0.2026  |
| 670 | S-277A_O75  | O75592 | E3 ubiquitin-prot MYCBP2 KIA  | -2.3548 | -1.9256 | -0.7972 | -1.3326 | -1.2739 | -1.1177 | -1.5103 | -1.9401 | -1.1292 | -1.0591 |
| 671 | S-278_Q6IQ  | Q6IQ49 | Replication stres SDE2 C1orf5 | -0.1890 | -0.3790 | -0.3515 | -0.3126 | -0.5263 | -0.5360 | -0.4720 | -0.5540 | -0.3652 | -0.3168 |
| 672 | S-2781_Q8V  | Q8WXH0 | Nesprin-2 (KASH SYNE2 KIAA    | -1.8074 | -1.6752 | -1.5305 | -1.6301 | -2.0213 | -1.7271 | -1.6218 | -1.6781 | -3.0816 | -2.0116 |
| 673 | S-279_Q134  | Q13428 | Treacle protein ( TCOF1       | -0.0685 | 0.0066  | 0.3332  | 0.6091  | 0.2689  | 0.2190  | 0.0410  | 0.2620  | 0.4056  | 0.3693  |
| 674 | S-279_Q9NF  | Q9NPI1 | Bromodomain-co BRD7 BP75 (    | 0.8902  | 0.8606  | 1.0433  | 0.9410  | 0.9731  | 0.7984  | 1.0882  | 0.9977  | 1.1084  | 0.9125  |
| 675 | S-280_O147  | O14745 | Na(+)/H(+) excha SLC9A3R1 N   | -0.4854 | -0.2522 | -0.4074 | -0.5867 | -0.6831 | -0.5555 | -0.4828 | -0.4294 | -0.7078 | -0.6569 |
| 676 | S-283_Q8IZI | Q8IZD4 | mRNA-decapping DCP1B          | -0.5187 | -0.0507 | -0.1406 | -0.0692 | 0.1428  | -0.1703 | 0.1445  | -0.1926 | -0.3702 | -0.0312 |
| 677 | S-283_Q9NZ  | Q9NZQ7 | Programmed cell CD274 B7H1    | -0.0237 | -0.5728 | 0.1050  | 0.3533  | 0.4856  | 0.1841  | 0.4264  | 0.2233  | 0.0686  | 0.0970  |
| 678 | S-283_Q9UL  | Q9ULX6 | A-kinase anchor AKAP8L NAK    | -1.2056 | -1.4742 | -1.0511 | -0.6083 | -0.7683 | -0.8477 | -1.0117 | -1.0593 | -1.1932 | -0.6773 |
| 679 | S-284_P619  | P61978 | Heterogeneous r HNRNPK HN     | 1.1997  | 0.9939  | 1.0052  | 0.7363  | 1.0639  | 1.0418  | 1.2530  | 1.2543  | 1.0822  | 1.0728  |
| 680 | S-284_Q6JB  | Q6JBY9 | CapZ-interacting RCSD1 CAPZ   | 0.4472  | 0.3632  | 0.7277  | 0.3037  | 0.4224  | 0.5978  | 0.6154  | 0.7191  | 0.2697  | 0.1548  |
| 681 | S-284_Q9Y6  | Q9Y624 | Junctional adhes F11R JAM1 J  | -1.0337 | -1.0103 | 0.4502  | 0.2256  | 0.6815  | -0.4023 | 0.3497  | 0.0395  | -0.0358 | -0.1865 |
| 682 | S-286_Q8TA  | Q8TAQ2 | SWI/SNF comple SMARCC2 B/     | -0.5634 | -0.6214 | -0.0200 | -0.0215 | -0.3353 | -0.3615 | -0.7491 | -0.5383 | -0.0422 | -0.4546 |
| 683 | S-2866_Q03  | Q03164 | Histone-lysine N- KMT2A ALL1  | -0.8921 | -1.0879 | -0.0841 | -0.3529 | -0.4615 | 0.0015  | -0.2643 | -0.0657 | 0.3738  | 0.3998  |
| 684 | S-287_Q9GZ  | Q9GZR7 | ATP-dependent f DDX24         | 0.2964  | 0.3701  | -0.4903 | 0.2237  | 0.2301  | -0.5599 | 0.1884  | -0.3338 | -0.5040 | -0.1851 |
| 685 | S-288_O948  | O94888 | UBX domain-con UBXN7 KIAA     | 0.7839  | 0.6782  | 0.4505  | 0.5386  | 0.0355  | 0.5539  | 0.3540  | 0.4404  | 0.7538  | 0.7359  |
| 686 | S-288_Q9UK  | Q9UKM9 | RNA-binding pro RALY HNRPC    | -0.3228 | -0.3392 | -0.3017 | -0.4812 | -0.5531 | -0.4789 | -0.3200 | -0.5251 | -0.5490 | -0.7191 |
| 687 | S-290_O948  | O94880 | PHD finger prote PHF14 KIAA(  | -0.6346 | -0.8923 | -0.3881 | -0.5062 | -0.5749 | -0.3711 | -0.7448 | -0.6088 | -0.0026 | -0.2464 |
| 688 | S-290_Q134  | Q13427 | Peptidyl-prolyl ci PPIG       | 0.5309  | 0.7083  | 1.4665  | 1.4384  | 1.4928  | 1.2556  | 1.8664  | 1.6057  | 1.4932  | 1.9301  |
| 689 | S-290_Q8TF  | Q8TF01 | Arginine/serine-r PNISR C6orf | -0.0255 | 0.0231  | 0.2173  | 0.1309  | -0.1159 | -0.1161 | -0.0502 | -0.2827 | 0.2633  | 0.3268  |
| 690 | S-290_Q9NY  | Q9NYF8 | Bcl-2-associated BCLAF1 BTF   | 0.2317  | 0.2551  | 0.3870  | 0.2921  | 0.2658  | 0.0978  | 0.6000  | 0.2772  | 0.2447  | 0.2325  |
| 691 | S-2900_P49  | P49792 | E3 SUMO-protein RANBP2 NUI    | 0.9277  | 1.2222  | -0.2019 | 0.2191  | 0.2032  | -0.2494 | 0.2077  | -0.2809 | -0.3158 | -0.2267 |
| 692 | S-291_P161  | P16150 | Leukosialin (GPL SPN CD43     | -1.8921 | -1.9256 | 0.0135  | -0.5138 | -0.9168 | -1.4421 | 0.2366  | -0.8686 | -0.9426 | -1.5798 |
| 693 | S-291_Q133  | Q13342 | Nuclear body prc SP140 LYSP1  | 0.9457  | 1.1617  | 0.9215  | 1.0728  | 0.8761  | 0.4434  | 1.1678  | 0.6585  | 0.5252  | 0.4997  |
| 694 | S-292_Q031  | Q03111 | Protein ENL (YEA MLLT1 ENL I  | 0.2485  | 0.2717  | -0.2647 | 0.3477  | -0.3470 | -1.2816 | 0.2896  | -0.1079 | -0.4640 | -0.1720 |
| 695 | S-293_P085  | P08559 | Pyruvate dehydr PDHA1 PHE1    | -0.2224 | -0.1260 | -0.0774 | -0.3552 | -0.1875 | -0.2961 | -0.2706 | -0.1736 | -0.1828 | -0.6387 |
| 696 | S-293_P783  | P78312 | Protein FAM193/ FAM193A C4    | -0.5904 | -0.3993 | -0.2824 | -0.2415 | -0.5053 | -0.3692 | -0.5233 | -0.4212 | -0.3045 | -0.2664 |
| 697 | S-294_Q96T  | Q96T37 | RNA-binding pro RBM15 OTT     | 0.1113  | 0.0522  | -0.3094 | -0.2082 | -0.3146 | -0.3885 | -0.1432 | -0.4418 | -0.2217 | -0.2327 |
| 698 | S-295_P365  | P36578 | 60S ribosomal pr RPL4 RPL1    | 0.1113  | 0.0797  | -0.0200 | -0.2165 | -0.3706 | -0.3482 | -0.1106 | -0.1822 | -0.3239 | -0.2028 |
| 699 | S-295_Q86Y  | Q86YS7 | C2 domain-conta C2CD5 CDP1    | 0.5753  | 0.4947  | 0.6126  | 0.2672  | 0.4737  | 0.8430  | 0.6154  | 0.7079  | 0.1494  | -0.1895 |
| 700 | S-295_Q9UK  | Q9UKV3 | Apoptotic chrom ACIN1 ACINI   | -0.3947 | 0.0077  | -0.5735 | -0.4492 | -0.1646 | -0.7100 | -0.0801 | -0.5903 | -0.6721 | -0.4406 |
| 701 | S-295_Q9Y5  | Q9Y5B6 | PAX3- and PAX7- PAXBP1 C21    | -1.4357 | -1.3032 | -0.9206 | -0.7870 | -1.4141 | -0.9134 | -1.5785 | -1.0980 | -0.9729 | -0.7621 |
| 702 | S-2956_O95  | O95613 | Pericentrin (Kenc PCNT KIAA0  | -4.7823 | -3.8882 | -3.7845 | -4.9631 | -5.0902 | -3.7124 | -3.7426 | -3.7329 | -4.1843 | -5.1764 |

|     |                   |                                         |         |         |         |         |         |         |         |         |         |         |
|-----|-------------------|-----------------------------------------|---------|---------|---------|---------|---------|---------|---------|---------|---------|---------|
| 703 | S-296_Q96R Q96RU3 | Formin-binding p FBNP1 FBP1             | 0.1063  | 0.0044  | -0.0147 | 0.0712  | -0.2044 | -0.1438 | -0.0275 | -0.2921 | -0.4268 | -0.3525 |
| 704 | S-297_Q9UI Q9UIS9 | Methyl-CpG-binding MBD1 CXXC            | -0.9123 | -0.9791 | -1.1087 | -1.2799 | -0.9808 | -0.9589 | -1.1722 | -1.0466 | -1.2509 | -1.0889 |
| 705 | S-297_Q9UC Q9UQ35 | Serine/arginine-rich SRRM2 KIAA         | -3.5331 | -3.7067 | -1.7967 | -1.6536 | -1.8124 | -1.7187 | -1.5067 | -1.3351 | -1.4645 | -1.1931 |
| 706 | S-298_Q6JB Q6JBY9 | CapZ-interacting RCSD1 CAPZ             | 2.1151  | 1.8416  | 2.1695  | 1.9672  | 2.1469  | 2.2550  | 2.1058  | 2.1834  | 2.2759  | 2.0403  |
| 707 | S-298_Q86U Q86UE4 | Protein LYRIC (3F MTDH AEG1             | -0.3664 | -0.3322 | 0.7328  | 0.4644  | 0.8343  | 0.6929  | 0.8710  | 1.1774  | 0.1588  | 0.0752  |
| 708 | S-2986_Q8N Q8NFC6 | Biorientation of (BOD1L1 BOI            | -0.1444 | -0.2964 | -0.1326 | -0.2994 | -0.4364 | -0.3369 | -0.4452 | -0.2958 | -0.0571 | -0.0260 |
| 709 | S-299_P079 P07910 | Heterogeneous rich HNRNPC HN            | -0.1167 | 0.0328  | -1.2410 | -1.6863 | -0.9485 | -1.0985 | -1.1869 | -1.4648 | -1.2664 | -1.6670 |
| 710 | S-30_Q7537 O75379 | Vesicle-associate VAMP4                 | -1.3355 | -1.7469 | -0.9133 | -1.1398 | -1.0174 | -0.8572 | -1.2528 | -1.1556 | -0.9187 | -1.0983 |
| 711 | S-300_Q751 O75113 | NEDD4-binding p N4BP1 KIAA              | -0.3664 | -0.3934 | 0.2747  | 0.0830  | 0.0604  | 0.0015  | -0.0610 | -0.1244 | -0.0557 | -0.0551 |
| 712 | S-300_Q9P2 Q9P289 | Serine/threonine STK26 MASK             | -0.6919 | -0.6664 | 0.4770  | -0.1263 | 0.2457  | 0.0221  | 0.1220  | -0.1787 | 0.4755  | 0.4211  |
| 713 | S-301_Q132 Q13247 | Serine/arginine-rich SRSF6 SFRS6        | 0.8020  | 0.8995  | 0.7223  | 0.7170  | 0.9266  | 0.6870  | 0.6147  | 0.7898  | 1.1899  | 1.0771  |
| 714 | S-3019_Q8N Q8NFC6 | Biorientation of (BOD1L1 BOI            | -0.2544 | -0.1979 | -0.0479 | -0.2103 | -0.2366 | 0.0338  | -0.0911 | -0.0434 | -0.0236 | -0.2898 |
| 715 | S-3029_Q8N Q8NFC6 | Biorientation of (BOD1L1 BOI            | 0.9936  | 1.0479  | 1.1448  | 1.3934  | 1.3857  | 1.3233  | 1.1896  | 1.3282  | 1.2963  | 1.5146  |
| 716 | S-303_Q006 Q00613 | Heat shock factor HSF1 HSTF1            | 0.8135  | 0.8225  | 0.5878  | 0.6563  | 0.6152  | 0.3139  | 0.6521  | 0.4430  | 0.5481  | 0.7310  |
| 717 | S-303_Q065 Q06546 | GA-binding protein GABPA E4TF           | -2.4406 | -2.8319 | -0.4116 | -0.4015 | -0.5886 | -0.6181 | -0.4435 | -0.3415 | -0.8113 | -0.3757 |
| 718 | S-303_Q86V Q86VQ1 | Glucocorticoid-inducible GLCC1          | 0.4604  | 0.2541  | 0.3926  | 0.0071  | 0.2856  | 0.2493  | 0.1643  | 0.3096  | 0.2922  | 0.2936  |
| 719 | S-304_Q168 Q16822 | Phosphoenolpyruvate PCK2 PEPCK          | 0.9791  | 0.8824  | 0.4589  | 0.4384  | -0.0746 | 0.3034  | 0.6703  | 0.5911  | 0.4877  | 0.6193  |
| 720 | S-304_Q6UN Q6UN15 | Pre-mRNA 3'-end FIP1L1 FIP1             | -0.0329 | -0.3392 | 0.1262  | 0.2657  | 0.1461  | 0.2393  | 0.0283  | 0.1174  | 0.3007  | -0.0971 |
| 721 | S-304_Q9P2 Q9P289 | Serine/threonine STK26 MASK NA          |         | NA      | -3.7462 | -3.7295 | -4.0357 | -3.9147 | -3.4016 | -3.0965 | -4.0862 | -3.6677 |
| 722 | S-305_Q9BV Q9BW71 | HIRA-interacting HIRIP3                 | -1.1128 | -1.0808 | -1.7210 | -1.1051 | -1.2562 | -1.5909 | -1.2722 | -1.2790 | -1.1784 | -1.0944 |
| 723 | S-306_P146 P14625 | Endoplasmic reticulum HSP90B1 GR        | -0.8329 | -0.4619 | -0.3264 | -0.8244 | -0.8064 | -0.5146 | -0.6603 | -0.7304 | -0.0802 | -0.0484 |
| 724 | S-307_P519 P51946 | Cyclin-H (MO15) CCNH                    | 0.4406  | 0.4106  | 0.5171  | 0.3781  | 0.2673  | 0.2985  | 0.2886  | 0.2363  | 0.3505  | 0.1362  |
| 725 | S-308_Q96N Q96MU7 | YTH domain-containing YTHDC1 KIAA       | 0.0339  | -0.0588 | -0.0653 | -0.4420 | 0.0832  | -0.1670 | -0.1854 | -0.3571 | 0.0561  | 0.1019  |
| 726 | S-309_Q9H1 Q9H171 | Z-DNA-binding protein ZBP1 C20orf       | -0.8921 | -0.7256 | -0.5580 | -0.7358 | -0.9663 | -1.1871 | -0.8346 | -0.9054 | -0.9154 | -1.2087 |
| 727 | S-31_P6232 P62328 | Thymosin beta-4 TMSB4X TB4              | -0.2479 | 0.1261  | 0.2388  | 0.1518  | 0.2032  | 0.2342  | 0.0833  | 0.0686  | 0.5828  | 0.6084  |
| 728 | S-31_Q9252 Q92522 | Histone H1.10 (H1H1-10 H1FX             | 2.1731  | 2.1864  | 1.9151  | 2.3073  | 2.3162  | 2.0647  | 2.4174  | 2.3608  | 1.2810  | 1.3608  |
| 729 | S-312_Q9BV Q9BWU0 | Kanadaplin (Human SLC4A1AP H            | 0.7354  | 0.4501  | 0.5086  | 0.1009  | 0.5348  | 0.6595  | 0.5763  | 0.8490  | 0.8223  | 0.5399  |
| 730 | S-312_Q9H8 Q9H8G2 | Caspase activity inhibitor CAAP1 C9orf  | 0.3863  | 0.1944  | -0.4496 | -0.3016 | 0.1936  | 0.3034  | 0.4522  | 0.2734  | 0.3668  | 0.5454  |
| 731 | S-313_Q3KC Q3KQU3 | MAP7 domain-containing MAP7D1 KIAA      | -3.7576 | -3.8882 | -3.4397 | -4.6192 | -4.4845 | -5.0639 | -3.4311 | -3.4397 | -5.7227 | -3.7907 |
| 732 | S-313_Q997 Q99795 | Cell surface A33 protein GPA33          | -0.3548 | -0.4711 | -0.2226 | 0.0980  | 0.1871  | 0.1496  | 0.2355  | 0.0525  | -0.4111 | -0.3993 |
| 733 | S-314_P678 P67809 | Y-box-binding protein YBX1 NSEP1        | -2.0182 | -2.2549 | -1.8100 | -1.7870 | -1.9414 | -1.8829 | -2.0787 | -2.0247 | -1.9755 | -2.6070 |
| 734 | S-315_Q002 Q00273 | DNA fragmentation factor DFFA DFF1      | 0.5297  | 0.5578  | 0.8355  | 0.6606  | 0.5847  | 0.7550  | 0.3792  | 0.5489  | 0.9684  | 0.9562  |
| 735 | S-315_P495 P49585 | Choline-phosphate cytochrome PCYT1A CTP | 0.3522  | 0.1342  | -0.3583 | -0.1415 | -0.0024 | -0.3966 | 0.3406  | 0.0945  | -0.6690 | -0.5757 |
| 736 | S-315_Q9NY Q9NYF8 | Bcl-2-associated BCLAF1 BTF             | -0.0448 | 0.0067  | 0.3746  | 0.1776  | 0.1548  | 0.1633  | 0.2554  | 0.3324  | 0.1610  | 0.1935  |
| 737 | S-315_Q9NZ Q9NZT2 | Opioid growth factor OGFR               | -1.3276 | -1.0302 | -0.7625 | -0.7599 | -1.4467 | -1.1885 | -1.0912 | -1.0925 | -0.9598 | -1.0513 |
| 738 | S-316_Q132 Q13247 | Serine/arginine-rich SRSF6 SFRS6        | 1.1703  | 1.3533  | 1.4830  | 2.0610  | 1.6330  | 1.5123  | 1.5455  | 1.8130  | 1.8507  | 1.9396  |
| 739 | S-317_Q6Z Q6ZRS2  | Helicase SRCAP (SRCAP KIAA)             | -1.6630 | -1.8359 | -1.7701 | -1.6920 | -1.7872 | -1.7721 | -1.9377 | -1.6635 | -1.8483 | -1.1939 |
| 740 | S-319_Q950 Q95049 | Tight junction protein TJP3 ZO3         | -3.3183 | -3.9553 | -3.1900 | -3.3782 | -3.1708 | -3.1804 | -3.1290 | -2.8382 | -2.7142 | -2.8359 |
| 741 | S-32_P3565 P35659 | Protein DEK DEK                         | 0.0054  | 0.3052  | 0.0981  | -0.1109 | -0.1564 | -0.0484 | 0.0648  | 0.0932  | -0.1681 | -0.2788 |

|     |            |         |                                           |         |         |         |         |         |         |         |         |         |         |
|-----|------------|---------|-------------------------------------------|---------|---------|---------|---------|---------|---------|---------|---------|---------|---------|
| 742 | S-32_Q1352 | Q13523  | Serine/threonine PRPF4B KIAA              | 0.3169  | 0.1867  | 0.4550  | 0.8804  | 0.8104  | 0.4960  | 0.3852  | 0.6594  | 0.5574  | 0.7227  |
| 743 | S-32_Q6ZVF | Q6ZVF9  | G protein-regulator GPRIN3 KIAA           | 0.2177  | 0.1291  | -0.0307 | 0.2877  | 0.1757  | 0.5620  | 0.4398  | 0.4848  | -0.6072 | -0.5122 |
| 744 | S-32_Q9H0V | Q9H0W8  | Protein SMG9 (P1 SMG9 C19orf              | 0.0619  | 0.1118  | -0.0708 | -0.1980 | -0.2065 | -0.1356 | -0.0610 | -0.1701 | 0.0347  | 0.1514  |
| 745 | S-320_Q130 | Q13043  | Serine/threonine STK4 KRS2 N NA           |         | NA      | -1.0658 | -1.5052 | -1.8339 | -1.4956 | -1.8842 | -1.6282 | -0.7960 | -1.1884 |
| 746 | S-320_Q5VT | Q5VTL8  | Pre-mRNA-splicing PRPF38B                 | -1.2959 | -1.0715 | -1.0063 | -1.0674 | -1.0139 | -1.1471 | -0.6278 | -1.1178 | -0.9451 | -1.0168 |
| 747 | S-320_Q9Y2 | Q9Y2W1  | Thyroid hormone receptor THRAP3 BCL       | -0.0590 | -0.1104 | 0.1500  | 0.0403  | -0.2562 | -0.1736 | -0.2289 | -0.0689 | 0.3413  | 0.2957  |
| 748 | S-321_Q8IX | Q8IXS8  | Protein FAM126B FAM126B                   | -2.1484 | -1.8201 | -1.3225 | -1.5343 | -1.8589 | -1.6692 | -1.1261 | -1.3669 | -1.9203 | -1.9507 |
| 749 | S-324_O759 | O75909  | Cyclin-K CENK CPR4                        | -0.5661 | -0.3561 | -0.4298 | -0.2605 | -0.4117 | -0.6763 | -0.4276 | -0.3435 | -0.2711 | -0.1433 |
| 750 | S-324_P369 | P36915  | Guanine nucleotide GNL1 HSR1              | -1.2871 | -1.5597 | -1.7107 | -1.7932 | -1.3470 | -1.5775 | -1.4738 | -1.4648 | -1.5876 | -1.4198 |
| 751 | S-324_Q86V | Q86VZ1  | P2Y purinoceptor P2RY8                    | -2.0182 | -1.4347 | -2.2534 | -2.2627 | -2.7683 | -2.4624 | -2.5327 | -2.2388 | -2.4930 | -2.5760 |
| 752 | S-325_P086 | P08670  | Vimentin VIM                              | 0.2786  | 0.0011  | -0.5427 | 0.1438  | -0.4564 | -0.3615 | -0.2335 | -0.4501 | -0.5263 | -0.1778 |
| 753 | S-325_Q140 | Q14004  | Cyclin-dependent CDK13 CDC2               | 0.1509  | 0.3088  | 0.2467  | 0.3863  | 0.2254  | 0.4012  | 0.2832  | 0.2595  | 0.4124  | 0.6768  |
| 754 | S-325_Q5T2 | Q5T200  | Zinc finger CCCH ZC3H13 KIAA              | -2.0553 | -2.1827 | -1.9648 | -2.2206 | -2.1060 | -2.0639 | -2.4523 | -1.9343 | -2.1550 | -1.6794 |
| 755 | S-327_O145 | O14545  | TRAF-type zinc finger TRAFD1 FLN          | 0.8823  | 0.5735  | -0.2497 | 0.3616  | -0.0288 | -0.3219 | 0.5226  | -0.0577 | -0.4784 | -0.3297 |
| 756 | S-328_Q438 | Q43823  | A-kinase anchor AKAP8 AKAP                | -1.1605 | -1.1979 | -0.9166 | -0.3598 | -1.2562 | -1.6834 | -1.3007 | -1.7431 | -1.5876 | -1.2058 |
| 757 | S-328_P322 | P32249  | G-protein coupled GPR183 EBI2             | 1.6738  | 1.5923  | 1.7128  | 1.6929  | 1.3073  | 1.7093  | 1.7216  | 1.8204  | 0.9980  | 0.9049  |
| 758 | S-328_Q3B7 | Q3B726  | DNA-directed RNA POLR1F TWI               | 1.4942  | 1.6716  | 1.4634  | 1.5861  | 1.2635  | 1.6246  | 1.5199  | 1.5462  | 1.6340  | 1.4869  |
| 759 | S-328_Q9Y6 | Q9Y608  | Leucine-rich repeat LRRFIP2               | 0.0877  | 0.2289  | -0.2068 | -0.1518 | -0.3898 | -0.3444 | -0.3948 | -0.1278 | -0.1814 | -0.0889 |
| 760 | S-329_P515 | P51531  | Probable global transcription SMARCA2 BAF | -0.4357 | -0.6385 | -1.1616 | -0.8466 | -0.8995 | -1.2816 | -1.1461 | -0.9758 | -0.8044 | -0.9114 |
| 761 | S-329_Q154 | Q15459  | Splicing factor 3A SF3A1 SAP1             | 0.0550  | 0.2854  | -0.1616 | -0.4204 | -0.3802 | -0.3164 | -0.0039 | -0.1667 | -0.2022 | -0.2058 |
| 762 | S-329_Q6UL | Q6UUUV7 | CREB-regulated transcription CRTC3 TORC   | -0.4211 | -0.3993 | -0.2991 | -0.5369 | -0.5831 | -0.2284 | -0.6258 | -0.3300 | -0.1038 | -0.2479 |
| 763 | S-329_Q86X | Q86X27  | Ras-specific guanine RALGPS2              | 0.1863  | 0.4484  | 0.4733  | 0.0745  | 0.6198  | 0.7020  | 0.4906  | 0.6261  | 0.7155  | 0.9022  |
| 764 | S-33_P0049 | P00491  | Purine nucleoside PNP NP                  | 0.7734  | 0.8141  | -0.0719 | 0.3533  | -0.0515 | 0.8911  | 0.3921  | 0.1369  | -0.0913 | -0.3790 |
| 765 | S-33_Q9252 | Q92522  | Histone H1.10 (H1H1-10 H1FX               | -0.7154 | -0.8438 | -0.5735 | -0.2268 | 0.0246  | -0.4200 | -0.2628 | -0.3908 | -0.8766 | -0.6228 |
| 766 | S-33_Q9Y3Z | Q9Y3Z3  | Deoxynucleoside SAMHD1 MCM                | 0.4392  | 0.4900  | 0.3571  | 0.3699  | 0.0849  | 0.0810  | 0.1291  | 0.0407  | -0.0052 | -0.0645 |
| 767 | S-330_P404 | P40425  | Pre-B-cell leukemia PBX2 G17              | -1.2696 | -1.2496 | -1.9854 | -1.5603 | -1.3706 | -1.6930 | -1.1899 | -1.5972 | -1.8389 | -1.6508 |
| 768 | S-330_Q96S | Q96S94  | Cyclin-L2 (Paneth) CCNL2 SB13             | 0.1113  | 0.1087  | -0.0653 | -0.1818 | -0.4923 | -0.2353 | -0.4810 | -0.3868 | -0.2633 | -0.2788 |
| 769 | S-330_Q9BS | Q9BSI4  | TERF1-interacting TINF2 TIN2              | -0.7607 | -1.0715 | -0.5396 | -0.6301 | -0.4539 | -0.6978 | -0.8002 | -0.8883 | -0.5414 | -0.8685 |
| 770 | S-331_P495 | P49585  | Choline-phosphatase PCYT1A CTPA           | -2.0109 | -2.0167 | -1.7314 | -1.3461 | -1.4794 | -2.1209 | -1.7645 | -1.8770 | -1.8250 | -1.8314 |
| 771 | S-331_Q9UI | Q9UI08  | Ena/VASP-like protein EVL RNB6            | -0.1186 | -0.2470 | 1.0423  | 0.5238  | 0.8771  | 0.4790  | 0.8072  | 0.6022  | 0.6704  | 0.4259  |
| 772 | S-331_Q9Y5 | Q9Y5Y4  | Prostaglandin D2 receptor PTGDR2 CRT      | -1.4703 | -1.7440 | -1.2609 | -0.8338 | -2.4439 | -1.7926 | -1.8415 | -1.5972 | -1.7575 | -1.8591 |
| 773 | S-332_P499 | P49915  | GMP synthase [gamma] GMPS                 | 0.7370  | 0.7043  | 0.6938  | 0.5962  | 0.7249  | 0.8677  | 0.7726  | 0.8178  | 1.1435  | 0.8496  |
| 774 | S-332_Q66P | Q66PJ3  | ADP-ribosylation ARL6IP4                  | 1.1751  | 1.2284  | 0.0715  | 0.1325  | 0.4196  | -0.2530 | 0.5923  | 0.0846  | -0.0449 | 0.2314  |
| 775 | S-333_P322 | P32249  | G-protein coupled GPR183 EBI2             | 0.1296  | 0.0744  | -0.2019 | -0.0378 | -0.3032 | 0.1603  | -0.0408 | 0.0903  | -0.1887 | -0.2449 |
| 776 | S-333_Q6JB | Q6JBY9  | CapZ-interacting RCSD1 CAPZ               | 0.3696  | 0.8956  | -0.0930 | 0.4199  | 0.5920  | 0.2406  | 0.3449  | 0.4550  | 0.3091  | 0.3910  |
| 777 | S-334_P497 | P49790  | Nuclear pore component NUP153             | -0.5877 | -0.7570 | -0.5876 | -0.4762 | -0.5290 | -0.5820 | -0.6685 | -0.4212 | -0.4802 | -0.6856 |
| 778 | S-335_Q5VS | Q5VSL9  | Striatin-interacting STRIP1 FAM           | -0.1108 | 0.0220  | 0.4006  | 0.2568  | 0.0780  | 0.2100  | 0.0308  | 0.0362  | 0.1388  | 0.3762  |
| 779 | S-335_Q8NI | Q8NDI1  | EH domain-binding EHBP1 KIAA              | -0.7515 | -0.9425 | -0.7107 | -0.7123 | -0.8522 | -0.7222 | -0.6893 | -0.5949 | -0.7335 | -0.6752 |
| 780 | S-3360_Q09 | Q09666  | Neuroblast differentiation AHNAK PM2      | -0.8329 | -1.0622 | 1.3693  | 0.3449  | 0.6246  | -0.7900 | 1.1833  | -0.1581 | -0.4604 | -0.5104 |

|     |             |        |                    |              |         |         |         |         |         |         |         |         |         |         |
|-----|-------------|--------|--------------------|--------------|---------|---------|---------|---------|---------|---------|---------|---------|---------|---------|
| 781 | S-338_Q9HC  | Q9HCN4 | GPN-loop GTPase    | GPN1 MBDII   | -0.5715 | -0.0370 | -1.2165 | -0.9459 | -1.2129 | -1.4542 | -0.7383 | -1.3828 | -1.1579 | -1.1793 |
| 782 | S-339_O957  | O95747 | Serine/threonine   | OXSRI KIAA   | 0.5924  | 0.6169  | 0.7452  | 0.6661  | 0.8384  | 0.7638  | 0.6847  | 0.7578  | 0.7766  | 0.6567  |
| 783 | S-339_P086  | P08651 | Nuclear factor 1   | NFIC NFI     | -0.6773 | -0.7403 | -0.2991 | -0.3416 | -0.3946 | -0.4300 | -0.4738 | -0.2865 | -0.1667 | -0.2773 |
| 784 | S-339_P176  | P17612 | cAMP-dependen      | PRKACA PKA   | -0.8233 | -0.8538 | -0.3949 | -0.3507 | -0.4845 | -0.4360 | -0.7470 | -0.4212 | -0.4912 | -0.4232 |
| 785 | S-339_Q8NC  | Q8NCN4 | E3 ubiquitin-prot  | RNF169 KIA   | 1.4735  | 1.6304  | 1.7188  | 1.5070  | 1.2372  | 1.5013  | 1.3397  | 1.4864  | 1.5578  | 1.3959  |
| 786 | S-34_P1933  | P19338 | Nucleolin (Protei  | NCL          | -1.7637 | -1.5435 | -0.2863 | -1.0786 | 0.0674  | -0.4101 | -0.2863 | 0.2518  | 0.9551  | 0.8862  |
| 787 | S-340_O759  | O75909 | Cyclin-K           | CCNK CPR4    | 0.1558  | 0.0044  | 0.2432  | 0.5039  | 0.3777  | 0.1880  | 0.3990  | 0.3426  | 0.1459  | -0.0026 |
| 788 | S-340_P683  | P68363 | Tubulin alpha-1B   | TUBA1B       | -0.2140 | -0.2483 | -0.6953 | -0.2289 | -0.1441 | -0.2780 | -0.0664 | -0.4130 | -0.7553 | -0.6149 |
| 789 | S-340_Q5VV  | Q5VVJ2 | Histone H2A deu    | MYSM1 KIA    | 0.9569  | 0.8752  | 0.7787  | 0.6311  | 0.5847  | 0.9118  | 0.6422  | 0.5931  | 0.6688  | 0.4712  |
| 790 | S-340_Q997  | Q99759 | Mitogen-activate   | MAP3K3 MA    | -0.0972 | -0.1752 | -0.0544 | 0.0947  | 0.0639  | -0.0195 | -0.3087 | -0.0061 | -0.0091 | -0.0312 |
| 791 | S-341_P287  | P28715 | DNA repair prote   | ERCC5 ERCC   | 1.1403  | 0.9430  | 1.5843  | 1.2076  | 1.5045  | 0.9851  | 1.3515  | 0.9174  | 1.7107  | 1.8280  |
| 792 | S-3412_Q09  | Q09666 | Neuroblast differ  | AHNAK PM2    | -0.7066 | -0.5132 | -1.5125 | -1.0233 | -1.4590 | -1.6551 | -1.3363 | -1.5834 | -2.2633 | -2.0273 |
| 793 | S-343_P322  | P32249 | G-protein couple   | GPR183 EBI   | -3.0704 | -2.2030 | -2.7073 | -2.8822 | -2.7809 | -3.1537 | -2.4311 | -2.8826 | -2.9858 | -2.9407 |
| 794 | S-3438_Q075 | O75592 | E3 ubiquitin-prot  | MYCBP2 KIA   | -1.8393 | -1.1627 | -0.4539 | -0.5655 | -0.5749 | -0.2852 | 0.0882  | -0.1145 | -0.7774 | -0.8452 |
| 795 | S-344_P820  | P82094 | TATA element m     | TMF1 ARA1    | 1.7628  | 1.5449  | 1.6736  | 1.4358  | 0.9418  | 1.4068  | 1.2333  | 1.2588  | 1.4853  | 1.0549  |
| 796 | S-345_A2A2  | A2A288 | Probable ribonuc   | ZC3H12D C6   | 0.6783  | 0.6734  | 0.5982  | 0.6102  | 0.3419  | 0.4981  | 0.3438  | 0.4280  | 0.2091  | 0.2115  |
| 797 | S-345_Q9UI  | Q9UI08 | Ena/VASP-like pr   | EVL RNB6     | -0.9089 | -0.8359 | 1.5226  | 1.1430  | 1.3440  | 0.4225  | 1.4929  | 1.2101  | 0.8098  | 0.3812  |
| 798 | S-347_P126  | P12694 | 2-oxoisovalerate   | BCKDHA       | -0.9123 | -0.7892 | -1.7809 | -0.9053 | -0.9099 | -1.3257 | -0.7383 | -1.0185 | -1.4146 | -1.4511 |
| 799 | S-347_P507  | P50750 | Cyclin-dependen    | CDK9 CDC2L   | -0.9468 | -1.0902 | -1.4713 | -1.4109 | -1.1100 | -0.9388 | -0.7867 | -0.9727 | -1.3436 | -1.5683 |
| 800 | S-347_Q8TA  | Q8TAQ2 | SWI/SNF comple     | SMARCC2 B    | 0.2536  | 0.2277  | 0.4041  | -0.0001 | 0.3440  | 0.4259  | 0.2647  | 0.5476  | 0.7337  | 0.7752  |
| 801 | S-347_Q9NS  | Q9NSI8 | SAM domain-cor     | SAMSN1 HA    | 0.0072  | -0.0347 | -0.1008 | -0.0805 | -0.1001 | -0.2744 | -0.2895 | -0.0817 | -0.2633 | -0.2297 |
| 802 | S-348_Q926  | Q92610 | Zinc finger protei | ZNF592 KIA   | 0.7359  | 0.7674  | 0.8817  | 0.8717  | 0.9796  | 0.9631  | 1.1003  | 1.1195  | 0.7813  | 0.8800  |
| 803 | S-349_O759  | O75995 | SAM and SH3 do     | SASH3 CXorf  | -1.7699 | -2.0950 | -2.0664 | -2.1637 | -1.9485 | -2.3983 | -2.3829 | -2.1079 | -2.0871 | -1.9808 |
| 804 | S-349_Q134  | Q13428 | Treacle protein (' | TCOF1        | 0.5692  | 0.5358  | 0.6841  | 0.9685  | 0.7860  | 0.8791  | 0.5966  | 0.8108  | 1.1429  | 1.1168  |
| 805 | S-349_Q135  | Q13523 | Serine/threonine   | PRPF4B KIA   | -2.9537 | -2.9130 | -1.6869 | -1.9425 | -1.6890 | -2.3596 | -1.7168 | -1.5607 | -1.9007 | -1.2633 |
| 806 | S-349_Q6IB  | Q6IBS0 | Twinfilin-2 (A6-r  | ε TWF2 PTK9L | -0.3829 | -0.3087 | 0.5639  | 0.6471  | 0.6623  | 0.7506  | 0.5459  | 0.7880  | 0.8529  | 0.2488  |
| 807 | S-349_Q9UI  | Q9UI08 | Ena/VASP-like pr   | EVL RNB6     | -0.7668 | -0.6231 | -0.3409 | -0.0470 | -0.3611 | -0.4380 | -0.2411 | -0.1462 | -0.6013 | -0.6447 |
| 808 | S-35_Q8TAC  | Q8TAD8 | Smad nuclear-int   | SNIP1        | 1.3856  | 1.6185  | 0.6283  | 0.5760  | 0.9833  | 0.5417  | 0.8553  | 0.2684  | 0.3112  | 0.6864  |
| 809 | S-350_Q146  | Q14684 | Ribosomal RNA      | γ RRP1B KIAA | -0.3093 | -0.5435 | -0.3908 | -0.3259 | -0.4464 | -0.0937 | -0.4189 | -0.4232 | -0.2997 | -0.3120 |
| 810 | S-351_P161  | P16150 | Leukosialin (GPL   | :SPN CD43    | 0.3434  | 0.1749  | 1.6403  | 1.1239  | 1.1990  | 0.9905  | 1.2951  | 1.5264  | 0.8703  | -0.0436 |
| 811 | S-351_Q96N  | Q96NB3 | Zinc finger protei | ZNF830 CCD   | -0.2739 | -0.2313 | -0.5185 | -0.3968 | -0.5667 | -0.8774 | -0.7275 | -0.6953 | -0.5624 | -0.2282 |
| 812 | S-351_Q9UM  | Q9UMN6 | Histone-lysine N-  | KMT2B HRX    | 0.3183  | 0.4581  | 0.5432  | 0.8203  | 0.4155  | 0.4401  | 0.4841  | 0.1018  | 0.4529  | 0.4740  |
| 813 | S-352_P381  | P38159 | RNA-binding moi    | RBMX HNRP    | -0.0934 | 0.0849  | 0.2146  | 0.3931  | 0.2032  | 0.2913  | 0.2155  | 0.1968  | 0.1842  | 0.1467  |
| 814 | S-352_Q9UK  | Q9UK58 | Cyclin-L1 (Cyclin- | CCNL1 BM-0   | 0.9777  | 1.0424  | 0.6158  | 0.7884  | 0.9364  | 0.7068  | 0.7757  | 0.5456  | 0.9443  | 0.9149  |
| 815 | S-353_Q9UC  | Q9UC35 | Serine/arginine r  | SRRM2 KIAA   | -1.5181 | -1.1903 | -1.7551 | -1.6585 | -1.3847 | -1.7871 | -1.4074 | -1.7774 | -1.6372 | -1.2742 |
| 816 | S-354_Q96K  | Q96K21 | Abscission/NoCu    | ZFYVE19 AN   | -1.2885 | -1.2216 | -0.6898 | -0.9866 | -0.9463 | -0.7594 | -1.1965 | -1.0240 | -0.7559 | -0.9450 |
| 817 | S-354_Q9UI  | Q9UI08 | Ena/VASP-like pr   | EVL RNB6     | -2.1011 | -2.0167 | -2.5892 | -2.0197 | -1.9844 | -1.9852 | -1.4702 | -2.0882 | -2.1321 | -2.1706 |
| 818 | S-355_P161  | P16150 | Leukosialin (GPL   | :SPN CD43    | 1.1285  | 1.0140  | 0.5521  | 0.5035  | 0.7791  | 0.7866  | 0.9388  | 0.9757  | 0.4215  | 0.0383  |
| 819 | S-358_P356  | P35611 | Alpha-adducin (E   | ADD1 ADDA    | 1.5221  | 1.9212  | 0.2128  | 0.0524  | 0.3462  | 0.2355  | 0.6881  | 0.3522  | 0.1634  | 0.0506  |



|     |            |        |                               |         |         |         |         |         |         |         |         |         |         |
|-----|------------|--------|-------------------------------|---------|---------|---------|---------|---------|---------|---------|---------|---------|---------|
| 820 | S-359_Q957 | O95747 | Serine/threonine OXSR1 KIAA   | -1.0515 | -0.8902 | -0.5275 | -0.5037 | -0.5210 | -0.5533 | -0.4103 | -0.2244 | -0.6112 | -0.4795 |
| 821 | S-359_Q154 | Q15459 | Splicing factor 3A SF3A1 SAP1 | -0.6374 | -0.3253 | -1.5704 | -1.3416 | -1.3850 | -1.2424 | -1.0328 | -0.8410 | -0.9858 | -1.3362 |
| 822 | S-359_Q9NC | Q9NQ55 | Suppressor of SV PPAN BXDC    | -0.1004 | -0.1905 | -0.4091 | -0.1698 | -0.1673 | -0.3637 | -0.3857 | -0.5492 | -0.1984 | -0.2284 |
| 823 | S-36_Q9BQ  | Q9BQ65 | U6 snRNA phosp USB1 C16orf    | -2.9537 | -3.6752 | -3.2991 | -2.7447 | -2.7936 | -3.0270 | -2.5252 | -3.2102 | -3.1962 | -3.1082 |
| 824 | S-36_Q9BTL | Q9BTL3 | RNA guanine-N7 RAMAC C15      | 0.2455  | 0.1159  | 0.0187  | -0.0215 | -0.0805 | 0.1198  | -0.1693 | 0.0332  | 0.0372  | 0.0518  |
| 825 | S-360_Q165 | Q16566 | Calcium/calmodu CAMK4 CAM     | -0.1289 | -0.0852 | 0.2325  | 0.2039  | 0.3222  | 0.4779  | 0.0077  | 0.2512  | 0.7381  | 0.6652  |
| 826 | S-360_Q7Z5 | Q7Z5L9 | Interferon regula IRF2BP2     | 0.5082  | 0.7868  | 0.1771  | 0.3308  | 0.3621  | 0.1171  | 0.0648  | 0.1032  | 0.1622  | 0.0970  |
| 827 | S-361_O760 | O76021 | Ribosomal L1 doi RSL1D1 CAT   | 0.7596  | 0.4646  | 1.2312  | 1.1725  | 1.4816  | 1.4461  | 1.2907  | 1.4051  | 0.9039  | 0.9694  |
| 828 | S-361_Q6P6 | Q6P6C2 | RNA demethylas ALKBH5 ABF     | -1.2098 | -1.3993 | -1.4713 | -1.2457 | -1.3706 | -1.4624 | -1.1120 | -1.3513 | -1.5837 | -1.6794 |
| 829 | S-362_P423 | P42331 | Rho GTPase-activ ARHGAP25     | 0.7818  | 0.7746  | 1.0208  | 0.7721  | 0.5385  | 0.8179  | 1.0052  | 1.0332  | 0.5845  | 0.6393  |
| 830 | S-362_P495 | P49585 | Choline-phospha PCYT1A CTP    | 0.5434  | 0.4492  | 0.3886  | 0.4292  | 0.1428  | 0.4812  | 0.3540  | 0.4605  | 0.4395  | 0.2379  |
| 831 | S-362_Q9U  | Q9UHB6 | LIM domain and LIMA1 EPLIN    | 0.3598  | 0.0880  | 0.4132  | 0.7223  | 0.3081  | 0.3106  | 0.0796  | 0.3256  | -0.0223 | 0.3196  |
| 832 | S-363_O144 | O14497 | AT-rich interactiv ARID1A BAF | -0.9757 | -1.1000 | -1.0046 | -1.4240 | -1.0596 | -1.1091 | -1.1512 | -0.9054 | -1.0738 | -0.9661 |
| 833 | S-363_Q006 | Q00613 | Heat shock facto HSF1 HSTF1   | -2.0628 | -1.9005 | -1.8472 | -1.8244 | -2.5914 | -1.7620 | -2.1008 | -2.1615 | -2.8389 | -2.8826 |
| 834 | S-364_Q9Y2 | Q9Y2W2 | WW domain-bin WBP11 NPM       | -1.4406 | -1.5927 | -1.6668 | -1.6029 | -1.5053 | -2.0331 | -1.9730 | -1.8437 | -1.1608 | -1.2388 |
| 835 | S-366_P054 | P05455 | Lupus La protein SSB          | 1.5924  | 1.6632  | 1.3342  | 1.3445  | 1.2762  | 1.0950  | 1.1546  | 1.1522  | 1.3182  | 0.9545  |
| 836 | S-366_Q8N5 | Q8N554 | Zinc finger protei ZNF276 CEN | -0.2056 | -0.7514 | -0.0436 | -0.2842 | 0.1022  | 0.1736  | -0.2535 | -0.0216 | 0.0296  | 0.0934  |
| 837 | S-368_Q135 | Q13523 | Serine/threonine PRPF4B KIAA  | -2.5634 | -1.2470 | -2.1900 | -1.9911 | -2.2301 | -2.1471 | -2.2784 | -2.0625 | -2.1321 | -2.1138 |
| 838 | S-368_Q9NC | Q9NQZ2 | Something about UTP3 CRLZ1    | -1.3502 | -1.5663 | -0.6668 | -0.4133 | -0.5263 | -0.5468 | -0.7601 | -0.5811 | -0.3669 | -0.3723 |
| 839 | S-369_Q965 | Q96594 | Cyclin-L2 (Panet CCNL2 SB13   | 1.6624  | 1.5216  | 0.8124  | 0.9539  | 0.8548  | 0.4608  | 0.7937  | 0.6643  | 0.4811  | 0.3989  |
| 840 | S-37_P0640 | P06400 | Retinoblastoma- RB1           | 0.0995  | -0.0797 | -0.2422 | -0.2648 | -0.3826 | -0.3182 | -0.1176 | -0.2790 | -1.0223 | -0.6711 |
| 841 | S-37_P1640 | P16402 | Histone H1.3 (Hi: H1-3 H1F3 H | 0.4649  | 0.6404  | 0.5884  | 0.5422  | 1.4842  | 1.4308  | 0.9220  | 1.1053  | -0.0118 | 0.1502  |
| 842 | S-37_Q9NQ  | Q9NQZ2 | Something about UTP3 CRLZ1    | -1.0644 | -1.0335 | -1.2022 | -1.1641 | -1.0785 | -0.7178 | -1.0868 | -1.1356 | -0.9606 | -0.7609 |
| 843 | S-37_Q9Y4F | Q9Y4F9 | Rho family-inter RIPOR2 C6o   | 1.4624  | 1.2430  | 1.1960  | 0.8996  | 0.9205  | 1.4080  | 1.3065  | 1.3540  | 1.3232  | 0.8918  |
| 844 | S-370_O751 | O75122 | CLIP-associating CLASP2 KIAA  | 1.5265  | 1.3248  | 1.7923  | 1.4811  | 1.5181  | 1.5939  | 1.5285  | 1.4929  | 1.4647  | 1.1426  |
| 845 | S-370_Q5F1 | Q5F1R6 | DnaJ homolog su DNAJC21 DN    | 0.5729  | 0.2744  | 0.1348  | -0.2691 | 0.3243  | 0.2506  | 0.2725  | 0.0451  | 0.2826  | 0.2999  |
| 846 | S-372_Q9H2 | Q9H2G2 | STE20-like serine SLK KIAA020 | -0.2587 | -0.4943 | 1.2520  | 1.4318  | 1.3118  | 1.2821  | 1.3692  | 1.3016  | 1.4581  | 1.6824  |
| 847 | S-372_Q9NS | Q9NSI8 | SAM domain-cor SAMSN1 HA      | -0.3876 | -0.5116 | -0.4326 | -0.3944 | -0.8194 | -0.7519 | -0.7470 | -0.6635 | -0.9326 | -0.9556 |
| 848 | S-375_Q134 | Q13428 | Treacle protein ( TCOF1       | -0.0590 | 0.2184  | 0.0635  | 0.4913  | -0.1020 | 0.2506  | 0.1666  | 0.4716  | 0.0219  | -0.2013 |
| 849 | S-375_Q142 | Q14289 | Protein-tyrosine PTK2B FAK2   | -0.4653 | -0.7477 | -0.4888 | -0.8659 | -0.7620 | -0.7951 | -0.5252 | -0.6042 | -0.5778 | -0.5437 |
| 850 | S-377_P062 | P06239 | Tyrosine-protein LCK          | 0.1719  | 0.1026  | -0.8719 | -0.4861 | -0.6713 | -0.5381 | -0.1943 | -0.1412 | -0.8862 | -0.6468 |
| 851 | S-377_Q8IX | Q8IXT5 | RNA-binding pro RBM12B        | 0.4929  | 0.5127  | 0.2101  | 0.4951  | 0.7935  | -0.0270 | 0.8101  | 0.2772  | 0.1114  | 0.3061  |
| 852 | S-377_Q965 | Q965T2 | Protein IWS1 hor IWS1 IWS1L   | -0.1524 | -0.3350 | 0.4108  | 0.4226  | 0.2719  | 0.1429  | 1.0359  | 0.3700  | 0.1899  | 0.5586  |
| 853 | S-378_Q9H4 | Q9H4A3 | Serine/threonine WNK1 HSN2    | -0.3758 | -0.2641 | 0.0544  | 0.2863  | -0.0981 | -0.3730 | -0.0815 | -0.0915 | -0.2885 | -0.4921 |
| 854 | S-378_Q9NZ | Q9NZT2 | Opioid growth fa OGFR         | -0.0628 | 0.2194  | -0.8415 | -0.5787 | -0.7159 | -0.6978 | -0.1275 | -0.4501 | -0.8090 | -0.8638 |
| 855 | S-379_P423 | P42331 | Rho GTPase-activ ARHGAP25     | -2.1011 | -2.1928 | 1.3000  | -0.1637 | 0.8528  | -1.3866 | 0.5557  | -0.6854 | -0.3618 | -1.3394 |
| 856 | S-38_O4331 | O43314 | Inositol hexakis PPIP5K2 HIS  | -1.3340 | -0.9489 | -0.9120 | -1.0844 | -1.0273 | -1.4492 | -0.8212 | -1.4643 | -1.4171 | -1.0297 |
| 857 | S-38_Q0182 | Q01826 | DNA-binding pro SATB1         | -0.0336 | -0.1874 | -0.0450 | -0.0352 | 0.0730  | 0.1758  | 0.0351  | 0.0190  | 0.4448  | 0.3247  |
| 858 | S-380_O603 | O60381 | HMG box-contain HBP1          | -1.4162 | -1.1188 | -0.9225 | -0.6891 | -0.8423 | -0.6341 | -0.9527 | -1.2496 | -1.1094 | -0.8874 |

|     |             |               |                                                 |         |         |         |         |         |         |         |         |         |         |
|-----|-------------|---------------|-------------------------------------------------|---------|---------|---------|---------|---------|---------|---------|---------|---------|---------|
| 859 | S-380_Q9C0  | Q9C0B5        | Palmitoyltransferase ZDHHC5 KIAA                | -0.3595 | -0.5322 | -0.2007 | -0.4062 | -0.2366 | -0.5019 | -0.4541 | -0.5273 | -0.5778 | -0.3541 |
| 860 | S-380_Q9HE  | Q9HB58        | Sp110 nuclear binding protein SP110             | 0.6571  | 0.6487  | 0.8093  | 0.4777  | 0.7355  | 0.6104  | 0.6827  | 0.6435  | 0.6524  | 0.3812  |
| 861 | S-381;446_C | Q13428;Q13429 | Treacle protein (TCOF1)                         | 0.8294  | 0.8072  | 1.3299  | 1.2501  | 1.4162  | 0.9268  | 1.5561  | 1.1679  | 0.8142  | 0.9825  |
| 862 | S-381_Q96L  | Q96LT9        | RNA-binding protein RNPC3 KIAA                  | -0.4042 | -0.5116 | -0.8340 | -0.8822 | -0.7777 | -0.7494 | -0.8322 | -0.5185 | -0.7078 | -0.3362 |
| 863 | S-382_Q9H6  | Q9H6Y2        | WD repeat-containing protein WDR55              | 0.6112  | 0.1886  | 0.3340  | 0.4747  | 0.1855  | 0.4080  | 0.0460  | 0.3795  | 1.0735  | 1.0512  |
| 864 | S-384_Q134  | Q13422        | DNA-binding protein IKZF1 IK1 IK2               | -0.5187 | -0.5927 | 0.2001  | -0.2755 | -0.2150 | 0.1389  | 0.2574  | -0.1112 | 0.0871  | 0.0850  |
| 865 | S-384_Q156  | Q15696        | U2 small nuclear ribonucleoprotein U2AF         | 0.2332  | 0.3649  | 0.1396  | 0.5950  | 1.0083  | 1.0052  | 0.4748  | 0.3818  | -0.0968 | -0.1605 |
| 866 | S-384_Q6P6  | Q6P6C2        | RNA demethylase ALKBH5 ABH1                     | -0.0685 | 0.0307  | -0.1733 | 0.2935  | -0.4794 | -0.4320 | -0.5516 | -0.5185 | -0.5528 | -0.6327 |
| 867 | S-384_Q8IU  | Q8IU81        | Interferon regulatory factor IRF2BP1            | -0.5370 | -1.5370 | 0.7239  | 0.5001  | 0.8831  | 0.8783  | 0.6977  | 0.7348  | 0.8687  | 1.1250  |
| 868 | S-384_Q9B5  | Q9BSQ5        | Cerebral cavernous malformation CCM2 C7orf10    | 0.4929  | 0.5927  | 0.3950  | 0.3849  | 0.5296  | 0.6037  | 0.4869  | 0.4661  | 0.3858  | 0.4703  |
| 869 | S-385_Q8N5  | Q8N5C8        | TGF-beta-activating protein TAB3 MAP3K10        | -0.8954 | -0.6129 | -0.2522 | -0.3944 | -0.3946 | -0.2388 | -0.5196 | -0.4480 | -0.1306 | -0.0194 |
| 870 | S-385_Q8NC  | Q8NC44        | Reticulophagy regulator RETREG2 C2orf10         | -0.5959 | -0.9214 | -0.3172 | -0.5867 | -0.7342 | -0.6504 | -0.9704 | -0.8166 | -0.6972 | -0.4724 |
| 871 | S-385_Q9C0  | Q9C0B0        | RING finger protein UNK KIAA1718                | -0.1932 | -0.1739 | 0.0745  | -0.1737 | -0.0195 | 0.1019  | -0.0435 | -0.1909 | 0.1065  | 0.1374  |
| 872 | S-385_Q9NY  | Q9NYF8        | Bcl-2-associated protein BCLAF1 BTF             | 0.9643  | 1.5468  | 0.0575  | 0.1260  | -0.1421 | -0.0937 | 0.1861  | -0.0593 | 0.0834  | 0.1444  |
| 873 | S-385_Q9UE  | Q9UEW8        | STE20/SPS1-related protein STK39 SPAK           | 0.9513  | 0.7881  | 0.9380  | 0.7191  | 0.7115  | 0.6622  | 0.7787  | 0.9746  | 0.4932  | -0.1138 |
| 874 | S-386_Q018  | Q01813        | ATP-dependent protease PFKF PFKFB1              | 0.1127  | 0.0159  | -0.1063 | 0.2019  | -0.0888 | -0.1096 | 0.1333  | 0.0439  | 0.1323  | 0.0730  |
| 875 | S-387_Q8N1  | Q8N1F8        | Serine/threonine kinase STK11IP KIAA1718        | 0.3696  | 0.2872  | 0.1510  | -0.1420 | 0.3791  | 0.2317  | 0.4273  | 0.2128  | 0.3310  | 0.1880  |
| 876 | S-387_Q996  | Q99638        | Cell cycle checkpoint protein RAD9A             | 0.6312  | 0.7252  | 0.7372  | 0.5725  | 0.5039  | 0.6125  | 0.6530  | 0.6311  | 0.8289  | 0.6524  |
| 877 | S-387_Q9Y6  | Q9Y6K9        | NF-kappa-B essential modulator IKBKG FIP3 NFKB1 | 0.3399  | 0.3794  | -0.0479 | 0.5386  | 0.4361  | 0.1116  | 0.4841  | 0.0817  | 0.0000  | 0.2336  |
| 878 | S-388_Q141  | Q14141        | Septin-6 SEPTIN6 KIAA1718                       | 0.0688  | -0.1406 | -0.1349 | -0.3126 | 0.1577  | -0.1520 | -0.3846 | 0.0152  | 0.0499  | -0.1648 |
| 879 | S-388_Q9Y2  | Q9Y2X7        | ARF GTPase-activating protein GIT1              | 0.8526  | 0.9104  | 0.8640  | 0.6184  | 0.7503  | 0.6669  | 0.6464  | 0.7889  | 0.7035  | 0.6185  |
| 880 | S-389_Q8IYE | Q8IYB3        | Serine/arginine methyltransferase SRRM1 SRM     | -1.6607 | -1.8170 | -1.7554 | -1.7739 | -1.6711 | -1.5385 | -1.6612 | -1.7327 | -1.8046 | -1.4708 |
| 881 | S-39_B5ME1  | B5ME19        | Eukaryotic translation initiation factor EIF3CL | 1.3053  | 1.2910  | 1.2591  | 1.0991  | 1.1085  | 1.2278  | 1.1077  | 1.1806  | 0.9347  | 0.4910  |
| 882 | S-39_P0407  | P04075        | Fructose-bisphosphate aldolase ALDOA ALDOA1     | 0.6613  | 0.8273  | 0.9215  | 0.8101  | 0.8890  | 1.2292  | 1.0716  | 1.2696  | 1.4690  | 0.9721  |
| 883 | S-39_P0997  | P09972        | Fructose-bisphosphate aldolase ALDOC ALDOA2     | -0.0628 | -0.3019 | -0.1627 | -0.4323 | 0.2128  | 0.1762  | -0.0801 | 0.1861  | 0.4802  | 0.4805  |
| 884 | S-39_Q9Y4H  | Q9Y4H4        | G-protein signaling protein GSPM3 AGS1          | -2.7948 | -2.5467 | -2.3198 | -2.3598 | -2.2129 | -2.2565 | -2.0302 | -2.1278 | -2.3271 | -2.5992 |
| 885 | S-390_P025  | P02545        | Prelamin-A/C [Chromatin] LMNA LMN1              | -0.6687 | -0.5646 | 0.1238  | -0.0555 | -0.4072 | -0.0743 | -0.4416 | -0.2545 | -0.7521 | -0.5678 |
| 886 | S-392_P025  | P02545        | Prelamin-A/C [Chromatin] LMNA LMN1              | 0.3154  | 0.4765  | 1.2915  | 1.3747  | 0.9523  | 0.9993  | 1.3807  | 1.4578  | 0.2458  | 0.3248  |
| 887 | S-392_Q995  | Q99549        | M-phase phosphatase MPHOSPH8                    | -2.3183 | -1.9172 | -1.0907 | -1.3416 | -0.9308 | -1.0090 | -1.0489 | -0.8382 | -0.7400 | -0.6168 |
| 888 | S-393_Q135  | Q13547        | Histone deacetylase HDAC1 RPD3                  | 0.0532  | -0.0484 | -0.4903 | -0.5113 | -0.3802 | -0.2583 | -0.1576 | -0.2352 | -0.1221 | 0.0825  |
| 889 | S-393_Q8IYE | Q8IYB3        | Serine/arginine methyltransferase SRRM1 SRM     | 0.8911  | 1.0339  | 0.0290  | -0.0824 | 0.1626  | -0.2601 | 0.4235  | 0.0197  | -0.2981 | 0.2799  |
| 890 | S-394_Q86V  | Q86V48        | Leucine zipper protein LUZP1                    | 0.4630  | 0.5472  | 1.0620  | 1.3379  | 1.2419  | 0.9692  | 1.2116  | 1.1376  | 0.4529  | 0.7071  |
| 891 | S-394_Q927  | Q92769        | Histone deacetylase HDAC2                       | -0.2849 | -0.4213 | -0.1792 | -0.5189 | -0.3564 | 0.0059  | -0.3561 | -0.0200 | 0.1634  | 0.2466  |
| 892 | S-397_Q134  | Q13427        | Peptidyl-prolyl isomerase PPIG                  | 1.1098  | 1.2169  | 0.6517  | 0.8393  | 0.7909  | 0.7434  | 0.7907  | 0.7566  | 0.6965  | 0.5962  |
| 893 | S-397_Q9NY  | Q9NYF8        | Bcl-2-associated protein BCLAF1 BTF             | 0.6555  | 0.9021  | -0.1627 | 0.0351  | -0.1060 | -0.2762 | -0.1475 | -0.1479 | -0.2370 | -0.0604 |
| 894 | S-398_Q011  | Q01167        | Forkhead box protein FOXK2 ILF IL13             | -0.0857 | 0.1769  | -0.1816 | -0.3237 | -0.5477 | -0.0969 | -0.2659 | 0.0182  | -0.2949 | -0.1249 |
| 895 | S-399_Q3KC  | Q3KQU3        | MAP7 domain-containing protein MAP7D1 KIAA1718  | -1.2098 | -0.9404 | -0.8247 | -1.4492 | -1.2344 | -1.1017 | -0.9654 | -1.3988 | -1.2478 | -1.3624 |
| 896 | S-399_Q7Z4  | Q7Z4V5        | Hepatoma-derived growth factor HDGF2 HDGF       | -0.8458 | -0.9769 | -1.1947 | -1.2041 | -1.3100 | -1.3520 | -1.2722 | -1.4069 | -1.4604 | -1.5760 |
| 897 | S-400_Q96S  | Q96ST2        | Protein IWS1 homolog IWS1 IWS1L                 | 0.1799  | 0.1906  | 0.3555  | 0.5856  | 0.1708  | 0.2840  | 0.0052  | 0.4131  | 0.4783  | 0.5681  |

|     |             |        |                    |          |       |     |         |         |         |         |         |         |         |         |         |         |
|-----|-------------|--------|--------------------|----------|-------|-----|---------|---------|---------|---------|---------|---------|---------|---------|---------|---------|
| 898 | S-402_Q134  | Q13422 | DNA-binding pro    | IKZF1    | IK1   | IK1 | -4.9398 | -4.0622 | -3.4511 | -2.7932 | -3.2739 | -3.3369 | -3.5941 | -3.4397 | -3.1493 | -3.0220 |
| 899 | S-403_Q5JSH | Q5JSH3 | WD repeat-cont     | WDR44    |       |     | -0.4455 | -0.4154 | -0.6486 | -0.3921 | -0.9203 | -0.5338 | -0.7040 | -0.7508 | -0.5151 | -0.5104 |
| 900 | S-403_Q9UK  | Q9UKG1 | DCC-interacting    | APPL1    | APPL  |     | -0.6402 | -0.4437 | -0.6519 | -0.8855 | -0.9449 | -0.4081 | -0.8025 | -0.9638 | -0.5856 | -0.4112 |
| 901 | S-404_P207I | P20700 | Lamin-B1           | LMNB1    | LMN   |     | -1.8649 | -1.5816 | -0.6701 | -0.7543 | -0.9256 | -0.6623 | -0.8338 | -0.7586 | -0.8886 | -0.8945 |
| 902 | S-404_Q96A  | Q96AD5 | Patatin-like phos  | PNPLA2   | ATG   |     | 0.0962  | -0.0867 | 0.0413  | -0.1797 | -0.0554 | 0.1019  | -0.0884 | 0.0107  | 0.1796  | 0.0381  |
| 903 | S-405_Q8WU  | Q8WUI4 | Histone deacetyl   | HDAC7    | HDA   |     | -1.8329 | -1.7403 | -1.5125 | -1.5138 | -1.2695 | -1.8884 | -1.7733 | -1.7952 | -1.5954 | -1.3925 |
| 904 | S-405_Q9Y6  | Q9Y6G9 | Cytoplasmic dyn    | DYNC1L1  | DI    |     | -1.3782 | -1.2261 | -0.3502 | -0.2248 | -0.5504 | -0.3331 | 0.0039  | -0.4356 | -0.3854 | -0.3723 |
| 905 | S-406_P207I | P20700 | Lamin-B1           | LMNB1    | LMN   |     | -0.6773 | -0.6507 | -0.1781 | -0.0433 | -0.1320 | -0.0331 | -0.0529 | 0.2167  | -0.3957 | -0.2773 |
| 906 | S-406_P235I | P23588 | Eukaryotic transl  | EIF4B    |       |     | -2.3364 | -2.2727 | -2.4173 | -2.5548 | -2.2744 | -2.2066 | -2.0474 | -2.3234 | -2.1359 | -2.5535 |
| 907 | S-406_Q135  | Q13547 | Histone deacetyl   | HDAC1    | RPD   |     | -0.2330 | -0.3775 | -0.0919 | -0.1225 | 0.3462  | 0.3716  | -0.0170 | 0.3207  | 0.3937  | 0.0394  |
| 908 | S-406_Q6UV  | Q6UWZ7 | BRCA1-A comple     | ABRAXAS1 | A     |     | -0.1747 | -0.3253 | -0.2888 | -0.3259 | -0.5370 | -0.3463 | -0.8048 | -0.5011 | -0.4303 | -0.4163 |
| 909 | S-406_Q9UE  | Q9UBW5 | Bridging integrat  | BIN2     | BRAP1 |     | 1.1063  | 0.9933  | 1.8118  | 1.3329  | 2.0797  | 1.0082  | 1.9099  | 1.5150  | 0.8976  | 0.9008  |
| 910 | S-407_Q9UE  | Q9UBB5 | Methyl-CpG-binc    | MBD2     |       |     | -0.1308 | -0.3615 | -0.2852 | -0.6643 | -0.4784 | -0.4387 | -0.5100 | -0.4022 | -0.3415 | -0.2869 |
| 911 | S-408_Q9Y2  | Q9Y2W1 | Thyroid hormon     | THRAP3   | BCL   |     | 0.7657  | 1.0357  | 0.9359  | 1.1650  | 0.9546  | 0.8509  | 1.3245  | 1.0447  | 0.9264  | 0.9769  |
| 912 | S-409_Q435  | Q43516 | WAS/WASL-inter     | WIPF1    | WASL  |     | -2.9260 | -3.1188 | -0.9958 | -1.0525 | -1.5158 | -1.3944 | -0.9628 | -0.9140 | -1.8067 | -1.7997 |
| 913 | S-41_Q96EV  | Q96EV2 | RNA-binding pro    | RBM33    | PRR   |     | -1.6346 | -2.2869 | -1.7737 | -2.0125 | -2.2651 | -1.9106 | -1.9935 | -2.3435 | -1.8250 | -1.8314 |
| 914 | S-410_Q130  | Q13043 | Serine/threonine   | STK4     | KRS2  | N   | 0.1671  | 0.4056  | 0.0290  | 0.1866  | 0.2795  | 0.3554  | 0.4176  | 0.5363  | -0.1493 | -0.3394 |
| 915 | S-410_Q9UK  | Q9UKV3 | Apoptotic chrom    | ACIN1    | ACIN1 |     | 0.5594  | 0.6117  | 0.7780  | 0.8273  | 0.4790  | 0.4629  | 0.4456  | 0.3256  | 0.8319  | 0.7665  |
| 916 | S-410_Q9Y2  | Q9Y2X7 | ARF GTPase-activ   | GIT1     |       |     | -1.0515 | -1.1953 | -1.1360 | -1.4252 | -1.1060 | -0.8584 | -1.0144 | -1.0278 | -1.1608 | -1.0618 |
| 917 | S-411_Q8IY1 | Q8IY17 | Patatin-like phos  | PNPLA6   | NTE   |     | -0.8556 | -0.9967 | -0.7176 | -0.7447 | -0.9133 | -0.8829 | -1.0870 | -0.9401 | -1.2142 | -1.2819 |
| 918 | S-412_Q9UC  | Q9UQR1 | Zinc finger protei | ZNF148   | ZBP1  |     | -0.4381 | -0.5548 | -0.5595 | -0.4911 | -1.0554 | -0.6930 | -0.7253 | -0.6182 | -0.7120 | -0.6090 |
| 919 | S-413_Q9P2  | Q9P270 | SLAIN motif-cont   | SLAIN2   | KIAA  |     | -1.0716 | -1.0205 | -1.2608 | -1.2140 | -0.9481 | -1.3598 | -1.4197 | -1.3462 | -1.4333 | -1.4576 |
| 920 | S-414_Q8IYE | Q8IYB3 | Serine/arginine r  | SRRM1    | SRM   |     | -1.3502 | -1.0599 | -1.1269 | -1.0488 | -0.8556 | -1.0890 | -1.0815 | -0.8686 | -1.4111 | -0.9334 |
| 921 | S-415_Q145  | Q14545 | TRAF-type zinc fi  | TRAFD1   | FLN   |     | 1.3008  | 1.1857  | 0.8851  | 0.9205  | 0.5309  | 0.5620  | 0.8373  | 0.7827  | 0.6704  | 0.5348  |
| 922 | S-415_Q134  | Q13427 | Peptidyl-prolyl ci | PPIG     |       |     | -1.5959 | -1.3476 | 0.8640  | 1.0421  | 0.6150  | 0.8061  | 0.9883  | 1.2350  | 0.5975  | 0.6622  |
| 923 | S-415_Q9Y5  | Q9Y5T5 | Ubiquitin carbox   | USP16    | MSTF  |     | 0.2636  | 0.1760  | 0.4038  | 0.2854  | 0.2631  | 0.1892  | 0.1844  | 0.0499  | 0.2893  | 0.2004  |
| 924 | S-417_P297I | P29728 | 2'-5'-oligoadenyl  | OAS2     |       |     | -0.1890 | -0.1333 | -0.2863 | -0.2670 | -0.5721 | -0.2371 | -0.2033 | -0.1598 | -0.2617 | -0.3313 |
| 925 | S-417_Q6DN  | Q6DN90 | IQ motif and SEC   | IQSEC1   | ARFC  |     | 0.9597  | 1.2026  | 1.0580  | 1.4779  | 1.1158  | 1.1164  | 1.2228  | 1.3066  | 0.5758  | 0.7793  |
| 926 | S-419_P163I | P16383 | Intron Large com   | GCFC2    | C2orf |     | -0.4187 | -0.6894 | -0.5381 | -0.6329 | -0.7809 | -0.5490 | -0.5746 | -0.6732 | -0.4533 | -0.2449 |
| 927 | S-419_Q134  | Q13428 | Treacle protein (  | TCOF1    |       |     | 1.0658  | 1.1076  | 0.8848  | 0.9245  | 0.8954  | 0.3165  | 0.7255  | 0.5939  | 0.8968  | 0.9205  |
| 928 | S-42_Q7582  | Q75821 | Eukaryotic transl  | EIF3G    | EIF3S |     | -0.5058 | -0.6454 | -0.5065 | -0.3898 | -0.5184 | -0.3924 | -0.4068 | -0.4376 | -0.4320 | -0.4867 |
| 929 | S-42_Q8NHZ  | Q8NHZ8 | Anaphase-promo     | CDC26    | ANAF  |     | 0.5533  | 0.2689  | 0.3522  | 0.3280  | 0.3390  | 0.4012  | 0.2509  | 0.1563  | 0.3495  | -0.0155 |
| 930 | S-42_Q9Y3P  | Q9Y3P9 | Rab GTPase-activ   | RABGAP1  | H     |     | 0.9652  | 0.7932  | 1.4065  | 1.2672  | 1.2543  | 1.0258  | 1.1591  | 0.8764  | 1.2578  | 1.1467  |
| 931 | S-42_Q9Y5S  | Q9Y5S9 | RNA-binding pro    | RBM8A    | RBM   |     | 0.2846  | 0.2031  | 0.1790  | 0.3767  | 0.6341  | 0.3106  | 0.6670  | 0.6172  | 0.3279  | 0.3319  |
| 932 | S-421_Q135  | Q13547 | Histone deacetyl   | HDAC1    | RPD   |     | 0.1879  | 0.0372  | 0.8777  | 0.7918  | 0.7678  | 0.5640  | 0.4273  | 0.5941  | 1.1418  | 1.0019  |
| 933 | S-422_Q927  | Q92769 | Histone deacetyl   | HDAC2    |       |     | -0.6884 | -0.3941 | -0.3972 | -0.2641 | -0.3110 | -0.7118 | -0.5259 | -0.5504 | -0.1885 | -0.1032 |
| 934 | S-422_Q96S  | Q96ST2 | Protein IWS1 hor   | IWS1     | IWS1L |     | 0.3154  | 0.4581  | 0.6749  | 0.6137  | 0.6294  | 0.5478  | 0.3951  | 0.5342  | 0.9463  | 1.0077  |
| 935 | S-423_P551I | P55198 | Protein AF-17 (Al  | MLLT6    | AF17  |     | -0.0926 | -0.5463 | -0.0669 | -0.0196 | 0.0907  | 0.1608  | -0.1635 | 0.1086  | 0.3304  | -0.1152 |
| 936 | S-423_Q135  | Q13547 | Histone deacetyl   | HDAC1    | RPD   |     | 0.2208  | 0.8047  | 0.1491  | 0.2921  | 0.3791  | 0.0338  | 0.0672  | 0.0031  | 0.3413  | 0.3693  |

|     |             |        |                    |         |       |         |         |         |         |         |         |         |         |         |         |
|-----|-------------|--------|--------------------|---------|-------|---------|---------|---------|---------|---------|---------|---------|---------|---------|---------|
| 937 | S-424_Q032  | Q03252 | Lamin-B2           | LMNB2   | LMN   | -0.8988 | -0.5419 | -0.0730 | -0.1302 | -0.1139 | -0.0331 | -0.3594 | -0.0466 | -0.2586 | -0.3248 |
| 938 | S-425_Q7Z3  | Q7Z3K3 | Pogo transposab    | POGZ    | KIAA0 | 1.6527  | 1.7395  | 1.7296  | 1.8442  | 1.7294  | 1.8726  | 1.6719  | 1.7733  | 1.8920  | 1.7707  |
| 939 | S-426_P479  | P47974 | mRNA decay acti    | ZFP36L2 | ERF   | -2.7948 | -2.5597 | -1.6405 | -1.2627 | -1.7872 | -1.4300 | -1.8509 | -1.6442 | -1.6434 | -1.8314 |
| 940 | S-428_P061  | P06127 | T-cell surface gly | CD5     | LEU1  | -1.0628 | -1.0461 | 0.3340  | -0.1263 | 0.2286  | -0.2441 | 0.1861  | 0.0831  | 0.1222  | 0.0000  |
| 941 | S-428_Q148  | Q14839 | Chromodomain-l     | CHD4    |       | -1.8921 | -1.9945 | -2.0318 | -2.7567 | -2.8194 | -2.6090 | -2.1519 | -2.9054 | -2.9451 | -2.2664 |
| 942 | S-43_P0404  | P04049 | RAF proto-oncog    | RAF1    | RAF   | 0.0809  | 0.0713  | 0.2634  | 0.2731  | 0.4947  | 0.5138  | 0.5053  | 0.4505  | 0.0993  | 0.2204  |
| 943 | S-431_O952  | O95232 | Luc7-like protein  | LUC7L3  | CRE   | 0.5801  | 0.7117  | 0.5031  | 0.8213  | 0.3273  | 0.5458  | 0.2233  | 0.7275  | 0.4066  | 0.2936  |
| 944 | S-431_P356  | P35611 | Alpha-adducin (E   | ADD1    | ADDA  | 0.5838  | 0.7359  | 0.0239  | 0.1741  | 0.1790  | -0.0149 | 0.1468  | -0.1328 | 0.3028  | 0.6695  |
| 945 | S-431_Q081  | Q08170 | Serine/arginine-r  | SRSF4   | SFRS4 | -4.3923 | -3.5021 | -3.1430 | -3.1400 | -3.1875 | -3.0639 | -2.8230 | -2.7534 | -3.0490 | -2.7555 |
| 946 | S-433_P352  | P35269 | General transcrip  | GTF2F1  | RAP   | 1.3378  | 1.3106  | 1.6444  | 1.2426  | 1.1903  | 1.0096  | 1.3060  | 1.1665  | 1.1150  | 0.8149  |
| 947 | S-434_Q055  | Q05519 | Serine/arginine-r  | SRSF11  | SFRS  | 1.0654  | 1.1612  | 0.6775  | 0.7501  | 0.8343  | 0.7655  | 0.8767  | 1.0008  | 0.7599  | 0.9760  |
| 948 | S-436_A6NC  | A6NC98 | Coiled-coil doma   | CCDC88B | BR    | -1.3410 | -1.3618 | -1.6275 | -2.0488 | -1.6480 | -1.7569 | -1.4452 | -1.6490 | -2.1435 | -1.4476 |
| 949 | S-437_P542  | P54274 | Telomeric repeat   | TERF1   | PIN2  | 0.2515  | 0.2634  | 0.1780  | 0.1129  | -0.1938 | 0.1722  | 0.1850  | 0.0774  | -0.0118 | 0.2607  |
| 950 | S-438_O948  | O94804 | Serine/threonine   | STK10   | LOK   | 0.8110  | 0.7970  | 0.9704  | 0.8010  | 0.8240  | 0.9071  | 0.8781  | 1.0503  | 0.7422  | 0.7398  |
| 951 | S-438_P086  | P08670 | Vimentin           | VIM     |       | -0.1788 | -0.3775 | -0.1087 | -0.0692 | -0.4819 | -0.5210 | -0.3445 | -0.5317 | -0.1335 | -0.1292 |
| 952 | S-439_O433  | O43318 | Mitogen-activate   | MAP3K7  | TAI   | -0.5528 | -0.4051 | -0.2032 | -0.2584 | -0.4489 | -0.3406 | -0.4086 | -0.5317 | -0.4233 | -0.3707 |
| 953 | S-439_P061  | P06127 | T-cell surface gly | CD5     | LEU1  | -2.8993 | -2.9251 | -3.2039 | -2.9477 | -2.8463 | -3.1647 | -2.5685 | -2.7868 | -3.1292 | -3.5723 |
| 954 | S-439_Q5JPI | Q5JPB2 | Zinc finger protei | ZNF831  | C20   | 1.9071  | 1.7788  | 1.5589  | 1.6802  | 1.5963  | 1.3831  | 1.5667  | 1.3946  | 1.6465  | 1.7098  |
| 955 | S-4396_Q15  | Q15149 | Plectin (PCN) (PL  | PLEC    | PLEC1 | -0.4981 | -0.6858 | -0.5735 | -0.6920 | -0.7968 | -0.8774 | -0.5327 | -0.6182 | -0.7931 | -0.7907 |
| 956 | S-44_P3523  | P35236 | Tyrosine-protein   | PTPN7   |       | -0.0876 | -0.2815 | -0.0021 | -0.1980 | 0.2333  | 0.2113  | -0.0052 | 0.1453  | 0.1727  | 0.0642  |
| 957 | S-44_Q9ULL  | Q9ULL5 | Proline-rich prot  | PRR12   | KIAA  | -0.7394 | -0.6646 | -1.0664 | -1.1518 | -1.1750 | -0.9793 | -1.1869 | -1.3128 | -0.9203 | -1.2914 |
| 958 | S-441_P234  | P23443 | Ribosomal protei   | RPS6KB1 | STI   | -1.5161 | -1.9989 | -1.5215 | -2.0937 | -1.7434 | -1.6787 | -1.1840 | -1.4069 | -1.8343 | -2.3362 |
| 959 | S-442_Q134  | Q13422 | DNA-binding pro    | IKZF1   | IK1   | -1.3093 | -1.5927 | -0.9547 | -0.7240 | -1.1139 | -0.7075 | -0.9477 | -0.7203 | -1.2917 | -1.1793 |
| 960 | S-444_Q089  | Q08945 | FACT complex su    | SSRP1   | FACT  | -0.4829 | -0.5712 | -0.5673 | -0.8724 | -0.9203 | -0.5842 | -0.7601 | -0.6928 | -0.5096 | -0.4706 |
| 961 | S-445_P850  | P85037 | Forkhead box pri   | FOXK1   | MNF   | 0.8416  | 0.9522  | 0.8331  | 0.8091  | 0.5981  | 0.8791  | 0.9843  | 0.6662  | 1.0296  | 1.2591  |
| 962 | S-445_Q134  | Q13422 | DNA-binding pro    | IKZF1   | IK1   | -0.3507 | -0.5546 | -0.0322 | 0.2853  | -0.1760 | -0.0778 | 0.0799  | 0.0949  | -0.2294 | -0.2323 |
| 963 | S-445_Q147  | Q14764 | Major vault prot   | MVP     | LRP   | 0.1345  | 0.1200  | -0.0382 | 0.2206  | -0.4215 | 0.1402  | 0.3367  | 0.4336  | 0.1126  | -0.2102 |
| 964 | S-446_Q5SS  | Q5SSJ5 | Heterochromatin    | HP1BP3  |       | -0.4854 | -0.7164 | -0.7227 | -0.7210 | -0.2762 | -0.3673 | -0.4523 | -0.5361 | -0.6700 | -0.9042 |
| 965 | S-446_Q9BZ  | Q9BZ67 | FERM domain-cc     | FRMD8   | FKSC  | -1.1686 | -1.5597 | -0.1804 | -0.8212 | -0.5886 | -0.7900 | -0.2643 | -0.6879 | -0.9602 | -1.1590 |
| 966 | S-448_Q8IZI | Q8IZD4 | mRNA-decapping     | DCP1B   |       | -0.6459 | -0.7835 | -0.5939 | -0.4812 | -0.7039 | -0.4748 | -0.6158 | -0.5163 | -0.7864 | -0.6752 |
| 967 | S-448_Q9HC  | Q9HOD6 | 5'-3' exoribonucl  | XRN2    |       | -1.7154 | -1.4589 | -2.8509 | -2.3060 | -2.5914 | -2.8133 | -2.1693 | -2.4069 | -2.5226 | -3.0325 |
| 968 | S-449_Q055  | Q05519 | Serine/arginine-r  | SRSF11  | SFRS  | 0.6637  | 0.7602  | 1.0343  | 1.4999  | 1.0520  | 0.6254  | 1.3411  | 1.2492  | 1.0878  | 1.0565  |
| 969 | S-450_Q8IYE | Q8IYB3 | Serine/arginine r  | SRRM1   | SRM   | 1.1958  | 1.3773  | 0.4875  | 0.7721  | 0.8312  | 0.6366  | 0.6547  | 0.5727  | 0.5644  | 0.8236  |
| 970 | S-452_Q8IYE | Q8IYB3 | Serine/arginine r  | SRRM1   | SRM   | 0.9314  | 0.6559  | 0.8881  | 0.7747  | 1.1113  | 0.8784  | 0.8790  | 0.6903  | 0.7746  | 0.7785  |
| 971 | S-453_Q86V  | Q86VP3 | Phosphofurin aci   | PACS2   | KIAA  | 0.7063  | 0.1077  | 0.6912  | 0.8263  | 1.0364  | 0.9470  | 1.0851  | 0.8419  | 0.6365  | 0.7031  |
| 972 | S-453_Q8IU  | Q8IU81 | Interferon regula  | IRF2BP1 |       | -1.9820 | -1.9682 | -1.9048 | -1.8498 | -1.8723 | -2.1081 | -1.9527 | -2.2977 | -2.1667 | -1.9211 |
| 973 | S-453_Q9H7  | Q9H7N4 | Splicing factor, a | SCAF1   | SFRS1 | -2.0704 | -1.6930 | -2.0885 | -2.4737 | -1.8995 | -2.1274 | -1.5824 | -1.7380 | -1.9501 | -1.6835 |
| 974 | S-454_A2RU  | A2RU30 | Protein TESPA1 (   | TESPA1  | KIAA  | -0.5450 | -0.6007 | -0.2133 | -0.5631 | 0.2545  | -0.0990 | -0.4268 | -0.4159 | -0.0134 | 0.0223  |
| 975 | S-455_O608  | O60832 | H/ACA ribonucle    | DKC1    | NOLA  | -0.9191 | -0.8478 | -0.5065 | -1.1757 | -0.4117 | -0.5621 | -0.4993 | -0.6635 | -0.2202 | -0.1793 |

|      |             |         |                                |         |         |         |         |         |         |         |         |         |         |
|------|-------------|---------|--------------------------------|---------|---------|---------|---------|---------|---------|---------|---------|---------|---------|
| 976  | S-456_Q055  | Q05519  | Serine/arginine-r SRSF11 SF    | 1.5924  | 1.6047  | 0.4607  | 0.9456  | 0.9170  | 0.2099  | 1.1055  | 0.6184  | 0.4644  | 0.4733  |
| 977  | S-456_Q081  | Q08170  | Serine/arginine-r SRSF4 SF     | 1.2689  | 1.2274  | 1.0834  | 1.1921  | 1.0884  | 0.9095  | 1.0697  | 1.1902  | 1.3546  | 1.2466  |
| 978  | S-456_Q9UC  | Q9UCQ35 | Serine/arginine r SRRM2 KIA    | 1.1767  | 1.5388  | 2.3114  | 2.5438  | 2.3199  | 2.2434  | 2.5572  | 2.4508  | 2.3385  | 2.5330  |
| 979  | S-457_Q151  | Q15117  | FYN-binding prot FYB1 FYB SL   | -0.1767 | 0.1362  | -0.2786 | -0.5629 | -0.5721 | -0.2998 | -0.4470 | -0.5996 | -0.3939 | -0.4976 |
| 980  | S-457_Q53E  | Q53EL6  | Programmed cell PDCD4 H731     | -0.4590 | -0.8753 | 0.4419  | -0.1444 | 0.3861  | 0.6170  | 0.6792  | 0.5064  | 0.1288  | -0.4745 |
| 981  | S-457_Q9BT  | Q9BTC8  | Metastasis-assoc MTA3 KIAA1    | -1.2915 | -1.2681 | -0.3881 | -0.0730 | -0.1340 | 0.0894  | 0.1480  | -0.0231 | 0.0232  | 0.2852  |
| 982  | S-458_Q081  | Q08170  | Serine/arginine-r SRSF4 SF     | 0.7074  | 0.6439  | -0.0885 | 0.3435  | 0.3592  | -0.2583 | 0.3128  | 0.1740  | 0.1005  | 0.1126  |
| 983  | S-458_Q9UE  | Q9UBW5  | Bridging integrat BIN2 BRAP1   | 0.9717  | 0.8167  | 0.5280  | 0.3194  | 0.2016  | 0.3739  | 0.1550  | -0.0403 | -0.4025 | -0.4267 |
| 984  | S-46_Q9540  | Q95400  | CD2 antigen cyto CD2BP2 KIA    | -0.2245 | -0.1953 | -1.2812 | -1.0415 | -1.0439 | -1.2145 | -0.8840 | -0.6395 | -0.9154 | -0.7885 |
| 985  | S-46_Q0244  | Q02446  | Transcription fac SP4          | 0.0054  | -0.4407 | -0.1360 | -0.0805 | -0.4742 | -0.1753 | -0.3846 | -0.2643 | -0.0706 | -0.1264 |
| 986  | S-46_Q8WW   | Q8WWP7  | GTPase IMAP fan GIMAP1 IM      | -0.4603 | -0.4650 | -0.3963 | -0.4886 | -0.1980 | -0.1339 | -0.5140 | -0.5317 | -0.3888 | -0.6918 |
| 987  | S-460_P511  | P51178  | 1-phosphatidylin PLCD1         | -0.6658 | -0.9835 | -0.4932 | -0.5472 | -0.7652 | -0.2708 | -0.6258 | -0.5585 | -0.9178 | -1.0090 |
| 988  | S-460_Q081  | Q08170  | Serine/arginine-r SRSF4 SF     | 1.6183  | 1.7012  | 1.8199  | 1.8848  | 1.5944  | 1.5845  | 1.7239  | 1.7590  | 2.0605  | 2.0170  |
| 989  | S-460_Q3KC  | Q3KQU3  | MAP7 domain-cc MAP7D1 KIA      | 0.5946  | 0.7530  | 0.2352  | 0.1975  | 0.1903  | 0.4068  | 0.3852  | 0.2543  | 0.6630  | 0.4638  |
| 990  | S-462_P552I | P55201  | Peregrin (Bromo) BRPF1 BR14    | -0.8787 | -0.9532 | -0.4727 | -0.5708 | -0.5263 | -0.8317 | -0.7339 | -0.8742 | -0.6515 | -0.4027 |
| 991  | S-4626_Q15  | Q15149  | Plectin (PCN) (PL) PLEC PLEC1  | -1.2739 | -1.4258 | -0.5215 | -0.9528 | -0.4043 | -0.5820 | -0.5289 | -0.3748 | -0.3602 | -0.5104 |
| 992  | S-463_Q751  | Q75122  | CLIP-associating CLASP2 KIAA   | -1.4653 | -1.4169 | -1.7773 | -1.1400 | -1.0176 | -1.5731 | -0.9082 | -1.4232 | -1.8959 | -1.0591 |
| 993  | S-463_P304  | P30414  | NK-tumor recogn NKTR           | -1.0780 | -1.0785 | -0.4815 | -0.5708 | -0.9064 | -0.7544 | -0.9180 | -1.2280 | -0.4111 | -0.3008 |
| 994  | S-464_Q5VL  | Q5VUA4  | Zinc finger protei ZNF318 HRII | -0.9928 | -0.9967 | -0.6210 | -0.8370 | -0.9133 | -0.6067 | -1.2350 | -0.8968 | -0.3991 | -0.6732 |
| 995  | S-464_Q86X  | Q86X29  | Lipolysis-stimula LSR LISCH    | 0.4272  | 0.2251  | 0.3415  | 0.1929  | 0.1936  | 0.4202  | 0.1735  | 0.4348  | 0.5627  | 0.5586  |
| 996  | S-466_Q96E  | Q96EP0  | E3 ubiquitin-prot RNF31 ZIBR   | 0.5862  | 0.5742  | 0.8783  | 0.7532  | 1.1992  | 1.2882  | 1.0019  | 1.1665  | 0.8615  | 0.9780  |
| 997  | S-466_Q9BV  | Q9BWU0  | Kanadaptin (Hun SLC4A1AP H     | -1.3099 | -1.6509 | -1.6243 | -1.4131 | -1.6040 | -1.4382 | -1.5899 | -1.4236 | -1.2589 | -1.1299 |
| 998  | S-466_Q9BX  | Q9BXL7  | Caspase recruitr CARD11 CAF    | -0.8787 | -0.9425 | -1.1828 | -1.2755 | -1.5053 | -1.5864 | -1.4919 | -1.4606 | -1.2540 | -1.1221 |
| 999  | S-467_Q96S  | Q96S59  | Ran-binding prot RANBP9 RAN    | 1.4709  | 1.5049  | 1.4097  | 1.6155  | 1.4697  | 1.4543  | 1.5871  | 1.5209  | 1.2622  | 1.2165  |
| 1000 | S-47_A6NK5  | A6NK59  | Ankyrin repeat a ASB14         | 0.1428  | 0.0479  | 0.3382  | 0.4186  | 0.3462  | 0.5468  | 0.3682  | 0.4472  | 0.3505  | 0.5515  |
| 1001 | S-47_Q96EB  | Q96EB6  | NAD-dependent SIRT1 SIR2L1     | -0.8201 | -0.6112 | -1.2509 | -1.4252 | -1.1421 | -1.3482 | -1.3897 | -1.2939 | -1.3174 | -1.1447 |
| 1002 | S-470_Q127  | Q12778  | Forkhead box pri FOXO1 FKHF    | -0.3365 | -0.5483 | -0.2165 | -0.7065 | -0.2584 | -0.1537 | -0.4259 | -0.3128 | 0.3556  | 0.5124  |
| 1003 | S-470_Q9UJ  | Q9UJX6  | Anaphase-promo ANAPC2 APC      | 0.5421  | 0.6481  | -0.0021 | 0.0627  | -0.5804 | -0.2406 | -0.0475 | -0.2155 | -0.2917 | -0.1576 |
| 1004 | S-471_P432  | P43243  | Matrin-3 MATR3 KIAA            | -1.0478 | -0.6858 | -1.2485 | -0.8466 | -0.3123 | -0.8884 | -0.3965 | -0.6276 | -1.6597 | -0.9334 |
| 1005 | S-473_Q132  | Q13263  | Transcription int TRIM28 KAP   | -0.7696 | -0.9873 | 0.0272  | -0.2855 | -0.0411 | -0.0932 | -0.1063 | -0.0046 | 0.0422  | -0.0770 |
| 1006 | S-4738_Q14  | Q14686  | Histone-lysine N- KMT2D ALR    | -1.8721 | -1.8518 | -2.0664 | -1.7567 | -1.6082 | -2.2007 | -2.1404 | -2.2173 | -1.9961 | -1.6468 |
| 1007 | S-474_Q130  | Q13098  | COP9 signalosom GPS1 COPS1     | -1.2158 | -1.0779 | -0.6073 | -0.5715 | -0.6922 | -0.6621 | -0.9288 | -0.9024 | -0.8145 | -0.8125 |
| 1008 | S-475_Q9BR  | Q9BRR9  | Rho GTPase-acti ARHGAP9        | 0.3442  | 0.1915  | 0.0991  | 0.0745  | -0.1381 | 0.1130  | -0.0870 | -0.0753 | -0.0382 | 0.1350  |
| 1009 | S-476_Q96J  | Q96JM3  | Chromosome ali CHAMP1 C1       | 0.7933  | 0.7022  | 0.1983  | 0.2538  | 0.3749  | 0.1496  | 0.6621  | 0.5880  | 0.3566  | -0.1998 |
| 1010 | S-477_Q141  | Q14157  | Ubiquitin-associ UBAP2L KIA    | -1.7948 | -2.1431 | -1.8434 | -2.5446 | -2.6596 | -2.3219 | -2.1233 | -2.4480 | -2.0329 | -2.4867 |
| 1011 | S-478_Q76N  | Q76N32  | Centrosomal pro CEP68 KIAA     | -0.7274 | -0.7020 | -1.1132 | -0.9806 | -1.1503 | -0.7469 | -0.9884 | -0.7534 | -0.6556 | -0.8200 |
| 1012 | S-48_A7E2V  | A7E2V4  | Zinc finger SWIM ZSWIM8 KIA    | -2.1167 | -2.0484 | -1.6735 | -1.4204 | -1.3706 | -1.3983 | -1.7601 | -1.5517 | -2.0276 | -2.1590 |
| 1013 | S-48_P6280  | P62805  | Histone H4 H4C1 H4/A           | -0.6068 | -0.4036 | -1.2165 | -0.4109 | -0.9099 | -0.2512 | -0.2690 | -0.5630 | -1.1873 | -1.0511 |
| 1014 | S-480_P178  | P17844  | Probable ATP-de DDX5 G17P1     | -1.5634 | -1.6197 | -0.9206 | -1.2799 | -1.4141 | -1.3983 | -0.8961 | -1.1581 | -1.4930 | -1.5914 |

|      |             |        |                               |         |         |         |         |         |         |         |         |         |         |
|------|-------------|--------|-------------------------------|---------|---------|---------|---------|---------|---------|---------|---------|---------|---------|
| 1015 | S-480_Q8IV  | Q8IV53 | DENN domain-cc DENND1C F/     | -0.2501 | -0.4959 | -0.7648 | -0.6523 | -1.0942 | -1.1603 | -0.8093 | -1.0721 | -1.0598 | -1.1590 |
| 1016 | S-480_Q929  | Q92945 | Far upstream ele KHSRP FUBP   | 0.5765  | 0.5548  | 0.6899  | 0.6368  | 0.5321  | 0.8389  | 0.5992  | 0.6891  | 0.9724  | 1.0580  |
| 1017 | S-480_Q997  | Q99767 | Amyloid-beta A4 APBA2 MIN1    | 0.1079  | 0.2336  | -0.1166 | 0.0524  | 0.1192  | -0.0060 | 0.1124  | 0.2246  | 0.5715  | 0.4497  |
| 1018 | S-481_P533  | P53396 | ATP-citrate synt# ACLY        | 1.2457  | 1.2631  | 1.0855  | 0.9422  | 0.5561  | 0.8250  | 0.9677  | 1.1756  | 1.0196  | 0.9482  |
| 1019 | S-481_Q8IZL | Q8IZL8 | Proline-, glutami PELP1 HMX3  | 0.7510  | 0.7983  | 0.3481  | 0.3137  | 0.3806  | 0.5107  | 0.4040  | 0.3329  | 0.5033  | 0.6335  |
| 1020 | S-482_Q156  | Q15642 | Cdc42-interactin# TRIP10 CIP4 | -0.2415 | -0.4896 | 0.1147  | 0.2701  | -0.2215 | 0.2010  | -0.1008 | -0.1787 | -0.0530 | -0.0538 |
| 1021 | S-483_P061  | P06127 | T-cell surface gly# CD5 LEU1  | 0.9287  | 0.8464  | -0.0410 | 0.0150  | -0.0396 | -0.0511 | 0.1310  | 0.2112  | -0.4068 | -0.4638 |
| 1022 | S-483_P425  | P42568 | Protein AF-9 (ALI MLLT3 AF9 Y | -0.1305 | -0.0313 | -0.0468 | -0.1597 | -0.2322 | 0.0163  | -0.1504 | -0.0947 | 0.0785  | 0.0242  |
| 1023 | S-483_Q055  | Q05519 | Serine/arginine-r SRSF11 SFRS | -0.0200 | -0.2081 | -0.4713 | -0.9322 | -0.4742 | -0.4727 | -0.3948 | -0.0882 | -0.3871 | -0.4441 |
| 1024 | S-4849_Q14  | Q14686 | Histone-lysine N- KMT2D ALR   | -0.6773 | -0.7384 | -0.3840 | -0.1341 | -0.2044 | -0.1290 | -0.5364 | -0.4294 | -0.2758 | -0.1490 |
| 1025 | S-485_P061  | P06127 | T-cell surface gly# CD5 LEU1  | 0.1831  | 0.2355  | -0.0986 | 0.3051  | 0.1175  | 0.1483  | 0.1315  | 0.3841  | -0.1066 | -0.1193 |
| 1026 | S-486_Q7KZ  | Q7KZ17 | Serine/threonine MARK2 EMK    | 0.2455  | 0.3450  | 0.5787  | 0.7458  | 0.7338  | 0.4035  | 0.5697  | 0.8487  | 0.7714  | 0.8229  |
| 1027 | S-488_Q9BC  | Q9BQC3 | 2-(3-amino-3-car DPH2 DPH2I   | -0.8921 | -1.0257 | -0.8415 | -0.7567 | -0.8656 | -0.7746 | -0.7800 | -0.8631 | -1.1962 | -0.9309 |
| 1028 | S-49_P1702  | P17026 | Zinc finger protei ZNF22 KOX1 | 0.3904  | 0.5304  | 0.7239  | 0.2053  | 0.9408  | 0.8205  | 0.8936  | 0.7191  | 0.3878  | 0.1891  |
| 1029 | S-49_Q9UP   | Q9UP83 | Conserved oligor COG5 GOLT3   | -1.5581 | -1.1928 | -0.3017 | -0.5472 | -0.2279 | -0.2336 | -0.2769 | -0.2827 | -0.3719 | -0.1793 |
| 1030 | S-49_Q9Y3T  | Q9Y3T9 | Nucleolar compl# NOC2L NIR    | 1.3030  | 1.2616  | 1.0849  | 1.1414  | 1.4783  | 1.4838  | 1.1770  | 1.2779  | 1.2442  | 1.0922  |
| 1031 | S-490_Q9UF  | Q9UHB6 | LIM domain and LIMA1 EPLIN    | 0.1847  | -0.0011 | 0.8783  | 0.4734  | 0.4563  | 0.6047  | 0.4408  | 0.4427  | 0.3434  | 0.3093  |
| 1032 | S-491_Q96P  | Q96PN7 | Transcriptional-r TRERF1 BCA  | -1.1605 | -1.2762 | -0.8547 | -1.0053 | -0.8522 | -1.1504 | -1.1928 | -1.1112 | -1.1992 | -1.0405 |
| 1033 | S-492_Q6UN  | Q6UN15 | Pre-mRNA 3'-enc FIP1L1 FIP1 I | -0.1767 | -0.1815 | -0.6569 | -0.5814 | -0.7311 | -0.6787 | -0.9603 | -0.8382 | -0.7752 | -0.6427 |
| 1034 | S-494_Q608  | Q60832 | H/ACA ribonucle DKC1 NOLA4    | -0.5303 | -0.7406 | -0.3920 | -0.5506 | -0.4066 | -0.3958 | -0.6268 | -0.5385 | -0.5424 | -0.2585 |
| 1035 | S-495_Q9NF  | Q9NRG9 | Aladin (Adracalin AAAS ADRA3  | -0.4066 | -0.1652 | -1.3542 | -1.2123 | -0.8656 | -1.4180 | -0.8093 | -1.2902 | -1.1122 | -1.1706 |
| 1036 | S-495_Q9NF  | Q9NRH2 | SNF-related serir SNRK KIAA00 | -1.9892 | -2.5338 | -2.0533 | -1.8181 | -2.2919 | -1.9162 | -2.2535 | -2.1615 | -1.3837 | -1.7043 |
| 1037 | S-496_Q9NY  | Q9NYF8 | Bcl-2-associated BCLAF1 BTF   | 0.2162  | 0.0818  | 0.3431  | 1.0264  | 0.7070  | 0.2876  | 0.8467  | 0.4880  | 0.3475  | 0.5480  |
| 1038 | S-497_Q9C0  | Q9C0K0 | B-cell lymphoma BCL11B CTIP   | 0.1767  | 0.2579  | 0.7565  | 0.5796  | 0.5785  | 0.4950  | 0.4369  | 0.5717  | 0.9341  | 0.8061  |
| 1039 | S-498_Q437  | Q43719 | HIV Tat-specific f HTATSF1    | -0.6516 | -0.1394 | -0.4844 | 0.1309  | -0.4117 | -0.1520 | -0.3948 | -0.1547 | -0.3452 | -0.5177 |
| 1040 | S-499_Q9HC  | Q9HOD6 | 5'-3' exoribonucl XRN2        | -0.5097 | -0.3850 | -0.1679 | 0.0128  | 0.0434  | -0.1551 | -0.0594 | -0.0218 | -0.1201 | 0.1188  |
| 1041 | S-5_P08670  | P08670 | Vimentin VIM                  | -1.5475 | -1.3336 | -0.8173 | -0.2457 | -1.0746 | -1.6090 | -0.8579 | -1.0154 | -1.6515 | -1.2571 |
| 1042 | S-50_Q9525  | Q95251 | Histone acetyltra KAT7 HBO1 I | -1.7948 | -1.8964 | -0.6275 | -0.7358 | -0.4264 | -0.2336 | -0.6000 | -0.5562 | -0.6112 | -0.7169 |
| 1043 | S-50_P1803  | P18031 | Tyrosine-protein PTPN1 PTP1   | -0.0459 | -0.0145 | -0.0021 | -0.0918 | -0.2540 | -0.0090 | -0.0732 | -0.0561 | -0.2853 | -0.3362 |
| 1044 | S-50_Q1326  | Q13263 | Transcription int# TRIM28 KAP | -1.4753 | -1.5338 | -1.0084 | -1.4062 | -1.1792 | -0.8829 | -1.1120 | -0.9698 | -0.5856 | -0.4795 |
| 1045 | S-50_Q1361  | Q13610 | Periodic tryptopl PWP1        | 0.1729  | -0.6752 | -0.3758 | -0.8056 | -0.5612 | -0.0529 | -0.1463 | -0.0660 | -0.2108 | -0.9284 |
| 1046 | S-50_Q96AT  | Q96AT1 | Uncharacterized KIAA1143      | 0.5508  | 0.3301  | 0.9137  | 0.7887  | 0.9418  | 1.1109  | 0.8131  | 0.8230  | 0.9571  | 0.8595  |
| 1047 | S-50_Q9NW   | Q9NWQ8 | Phosphoprotein PAG1 CBP P/    | 0.4538  | 0.5698  | 0.4535  | 0.0897  | 0.3946  | 0.9182  | 0.3601  | 0.6834  | -0.0065 | -0.0352 |
| 1048 | S-501_P426  | P42679 | Megakaryocyte-# MATK CTK H    | -0.4579 | -0.4392 | -0.1314 | -0.3060 | -0.4190 | -0.2007 | -0.2108 | -0.0545 | -1.0652 | -0.9090 |
| 1049 | S-501_Q132  | Q13263 | Transcription int# TRIM28 KAP | -1.4653 | -1.2815 | -0.5110 | -0.5655 | -0.5914 | -0.3463 | -0.9654 | -0.3223 | -0.3585 | 0.0801  |
| 1050 | S-502_Q68E  | Q68E01 | Integrator compl INTS3 C1orf: | 0.6601  | 0.7784  | -0.3502 | -0.3016 | -0.0046 | -0.1405 | 0.2110  | -0.0325 | -0.5022 | -0.2192 |
| 1051 | S-503_Q759  | Q75925 | E3 SUMO-proteir PIAS1 DDXB1   | 0.4406  | 0.3947  | 0.4482  | 0.1534  | 0.0918  | 0.3225  | 0.2970  | 0.1188  | 0.5198  | 0.4497  |
| 1052 | S-503_Q9BY  | Q9BY44 | Eukaryotic transl EIF2A CDA0: | 0.5120  | 0.4427  | 0.9747  | 0.8233  | 0.7316  | 0.9166  | 0.6637  | 0.6062  | 0.7729  | 0.6784  |
| 1053 | S-504_P235  | P23588 | Eukaryotic transl EIF4B       | -1.0972 | -1.2815 | -0.6421 | -0.0269 | 0.0246  | -0.5360 | -0.0249 | -0.1178 | -0.9476 | -0.6980 |

|      |             |        |                    |                 |         |         |         |         |         |         |         |         |         |         |
|------|-------------|--------|--------------------|-----------------|---------|---------|---------|---------|---------|---------|---------|---------|---------|---------|
| 1054 | S-506_Q3MI  | Q3MIH6 | TBC1 domain fan    | TBC1D25 OA      | -0.0818 | -0.3604 | -0.2019 | -0.3148 | -0.3611 | -0.4706 | -0.1899 | -0.5141 | -0.5547 | -0.6050 |
| 1055 | S-506_Q9BY  | Q9BY44 | Eukaryotic transl  | EIF2A CDA02     | 0.7250  | 0.6865  | 0.5002  | 0.4606  | 0.5155  | 0.4726  | 0.3479  | 0.5655  | 0.4462  | 0.4125  |
| 1056 | S-507_Q96JI | Q96JM3 | Chromosome ali     | CHAMP1 C1       | -1.3093 | -1.3589 | -1.0211 | -0.9053 | -0.8032 | -1.3482 | -0.9961 | -0.7431 | -1.3337 | -1.2602 |
| 1057 | S-5077_Q09  | Q09666 | Neuroblast differ  | AHNAK PM2       | 1.1982  | 0.9994  | 1.3652  | 1.5013  | 1.1511  | 1.2481  | 1.4952  | 1.1480  | 0.3718  | 0.4028  |
| 1058 | S-508_Q2VP  | Q2VPK5 | Cytoplasmic tRN    | CTU2 C16orf     | -1.0366 | -1.2708 | -0.6618 | -0.7123 | -1.1179 | -0.4042 | -1.1346 | -1.0372 | -0.6413 | -0.6248 |
| 1059 | S-51_P0867I | P08670 | Vimentin           | VIM             | 0.1525  | 0.0964  | -0.3502 | 0.1470  | -0.4897 | -0.2816 | 0.3692  | 0.0846  | -0.8022 | -1.3993 |
| 1060 | S-51_Q1651  | Q16514 | Transcription init | TAF12 TAF12     | 0.5963  | 0.5059  | 0.7193  | 0.7325  | 0.2151  | 0.3759  | 0.5434  | 0.4625  | 0.6867  | 0.8148  |
| 1061 | S-51_Q86YV  | Q86YV0 | RAS protein activ  | RASAL3          | -1.4520 | -1.6002 | 0.0292  | -0.6209 | -0.1002 | -0.7755 | 0.1485  | -0.3737 | -0.2548 | -0.7480 |
| 1062 | S-51_Q96SB  | Q96SB4 | SRSF protein kin   | SRPK1           | -0.0478 | 0.0723  | -0.0566 | -0.0071 | -0.2129 | 0.0074  | -0.1605 | -0.1161 | -0.2602 | -0.2162 |
| 1063 | S-51_Q9954  | Q99549 | M-phase phosph     | MPHOSPH8        | 0.8027  | 0.6432  | -0.2824 | -0.1051 | 0.0727  | -0.0764 | -0.0091 | -0.1079 | -0.3652 | -0.6149 |
| 1064 | S-510_Q9BP  | Q9BPZ7 | Target of rapamy   | MAPKAP1 N       | 1.2756  | 1.3186  | 1.2837  | 1.0712  | 1.3628  | 1.1516  | 1.2779  | 1.0860  | 1.0245  | 0.9193  |
| 1065 | S-511_Q096  | Q09666 | Neuroblast differ  | AHNAK PM2       | 0.2726  | 0.3632  | 0.3198  | 0.0796  | 0.0156  | 0.1033  | 0.0039  | -0.0657 | -0.8838 | -0.9407 |
| 1066 | S-512_Q135  | Q13586 | Stromal interacti  | STIM1 GOK       | 0.7660  | 0.9782  | 0.0775  | 0.3463  | -0.1523 | -0.1001 | 0.2189  | -0.0325 | -0.3871 | -0.3024 |
| 1067 | S-512_Q9BX  | Q9BXL7 | Caspase recruitr   | CARD11 CAF      | 0.9597  | 1.0290  | 1.0745  | 1.3265  | 1.1013  | 1.3927  | 1.3007  | 1.2595  | 1.2740  | 1.0636  |
| 1068 | S-512_Q9NY  | Q9NYF8 | Bcl-2-associated   | BCLAF1 BTF      | 1.4538  | 1.5649  | 1.5992  | 1.6752  | 1.3820  | 1.5815  | 1.3877  | 1.7242  | 2.0071  | 1.9851  |
| 1069 | S-513_O608  | O60832 | H/ACA ribonucle    | DKC1 NOLA4      | 1.0817  | 0.7272  | 1.0499  | 1.0395  | 1.1610  | 0.9692  | 1.0161  | 0.7265  | 0.6971  | 0.6904  |
| 1070 | S-514_O948  | O94804 | Serine/threonine   | STK10 LOK       | -0.9537 | -0.8280 | -0.8873 | -0.7870 | -0.9238 | -0.6621 | -0.7867 | -0.5406 | -1.1066 | -0.9885 |
| 1071 | S-515_Q6PJ  | Q6PJT7 | Zinc finger        | CCCH ZC3H14     | 2.0171  | 1.9917  | 1.8536  | 1.7969  | 1.6341  | 1.6447  | 1.7941  | 1.7435  | 1.9115  | 1.7421  |
| 1072 | S-515_Q96M  | Q96MU7 | YTH domain-con     | YTHDC1 KIAA     | -4.8329 | -2.8638 | -2.8063 | -3.1878 | -2.4742 | -2.5555 | -2.5863 | -2.8382 | -3.2822 | -3.0645 |
| 1073 | S-517_Q96R  | Q96RU3 | Formin-binding     | FNBP1 FBP1      | -0.3035 | -0.3803 | -0.3145 | -0.7924 | -0.5285 | -0.3896 | -0.5107 | -0.2800 | -0.4016 | -0.3866 |
| 1074 | S-518_P295I | P29590 | Protein PML (Prc   | PML MYL PP      | -0.7707 | -0.8372 | -0.6923 | -0.7244 | -0.8416 | -0.6760 | -0.7723 | -0.7802 | -0.6856 | -0.4724 |
| 1075 | S-519_O005  | O00567 | Nucleolar protei   | NOP56 NOLA      | 0.7649  | 0.4064  | 0.1836  | -0.4299 | 0.3462  | 0.5417  | 0.5181  | 0.4804  | 0.2922  | 0.2237  |
| 1076 | S-52_Q8N9C  | Q8N9Q2 | Protein SREK1IP1   | SREK1IP1 P1     | -1.3365 | -1.1236 | -0.4270 | -0.8921 | -0.3730 | -1.1339 | -0.9278 | -0.9668 | -0.0996 | 0.0481  |
| 1077 | S-52_Q8TAC  | Q8TAD8 | Smad nuclear-int   | SNIP1           | -1.4804 | -1.2081 | -1.5923 | -1.9087 | -1.3802 | -1.6044 | -1.4523 | -1.5789 | -1.7357 | -1.1533 |
| 1078 | S-52_Q8TAP  | Q8TAP8 | Protein phosphat   | PPP1R35 C7      | 0.0215  | -0.0692 | -0.4511 | -0.4861 | -0.7620 | -0.6112 | -0.3495 | -0.3415 | -0.6272 | -0.4406 |
| 1079 | S-52_Q9Y2V  | Q9Y2V2 | Calcium-regulate   | CARHSP1         | 0.7871  | 0.5898  | 0.5090  | 0.2313  | 0.6330  | 0.6993  | 0.7581  | 0.5182  | 0.4821  | 0.0343  |
| 1080 | S-521_Q150  | Q15057 | Arf-GAP with coil  | ACAP2 CENT      | 0.4942  | 0.2430  | 0.6112  | 0.4644  | 0.2810  | 0.6984  | 0.4673  | 0.5161  | 0.4415  | 0.7436  |
| 1081 | S-521_Q6PK  | Q6PKG0 | La-related protei  | LARP1 KIAA      | -2.0628 | -2.6681 | -1.1246 | -1.6692 | -1.3423 | -1.5040 | -1.6338 | -1.4946 | -1.9451 | -1.1969 |
| 1082 | S-521_Q9C0  | Q9C0E2 | Exportin-4 (Exp4   | XPO4 KIAA1      | 0.7348  | 0.5993  | 0.2494  | 0.5867  | 0.3635  | 0.5549  | 0.7216  | 0.6507  | 0.2794  | 0.3237  |
| 1083 | S-522_O751  | O75167 | Phosphatase anc    | PHACTR2 C6      | -0.6601 | -0.4912 | -0.4496 | -0.0899 | 0.0462  | 0.0908  | 0.0372  | -0.0387 | -0.7531 | -0.8993 |
| 1084 | S-524_P332  | P33240 | Cleavage stimula   | CSTF2           | -0.7637 | -0.7329 | -1.0708 | -1.1838 | -1.1462 | -0.4935 | -0.9704 | -0.6088 | -0.4930 | -0.4476 |
| 1085 | S-525_Q9NF  | Q9NPI6 | mRNA-decapping     | DCP1A SMIF      | -0.7454 | -0.6368 | -1.0021 | -1.1244 | -1.0785 | -1.2601 | -1.2597 | -1.6019 | -0.9883 | -0.7642 |
| 1086 | S-526_Q7KY  | Q7KYR7 | Butyrophilin sub   | BTN2A1 BT2      | 0.1477  | 0.3675  | 0.4830  | 0.6056  | 0.3735  | 0.6007  | 0.6662  | 0.6681  | -0.1435 | -0.3410 |
| 1087 | S-527_P295I | P29590 | Protein PML (Prc   | PML MYL PP      | -0.4066 | -0.4803 | -0.7595 | -0.3828 | -0.5914 | -0.7620 | -0.6000 | -0.6854 | -0.6152 | -0.2804 |
| 1088 | S-528_Q9NF  | Q9NPQ8 | Synembryn-A (Pr    | RIC8A           | -1.3971 | -1.4959 | -1.1546 | -1.4737 | -1.3055 | -1.0732 | -1.3265 | -0.9401 | -1.3502 | -1.0889 |
| 1089 | S-529_Q5VT  | Q5VTL8 | Pre-mRNA-splicir   | PRPF38B         | -0.4480 | -0.6282 | 0.3257  | 0.4670  | 0.7591  | 0.6650  | 0.8532  | 0.7061  | 0.1341  | 0.3861  |
| 1090 | S-53_A7E2V  | A7E2V4 | Zinc finger        | SWIM ZSWIM8 KIA | -2.6574 | -2.5189 | -2.7861 | -3.1388 | -2.7851 | -3.0168 | -3.0469 | -2.7873 | -3.0332 | -3.0318 |
| 1091 | S-53_O6086  | O60869 | Endothelial diffe  | EDF1 NA         | NA      | NA      | -1.0818 | -1.8244 | -0.5290 | -3.2636 | -0.4311 | -1.8547 | -2.3403 | -2.9910 |
| 1092 | S-53_Q9BTA  | Q9BTA9 | WW domain-con      | WAC KIAA1E      | 0.1695  | -0.2903 | 0.4217  | 0.3607  | 0.4907  | 0.6071  | 0.1810  | 0.5936  | 0.7305  | 0.5817  |

|      |                     |                                 |         |         |         |         |         |         |         |         |         |         |
|------|---------------------|---------------------------------|---------|---------|---------|---------|---------|---------|---------|---------|---------|---------|
| 1093 | S-530_Q6NY Q6NYC8   | Phostensin (Prot. PPP1R18 HK    | 0.4087  | 0.2735  | 0.8140  | 0.6313  | 0.4501  | 0.2593  | 0.8665  | 0.5525  | 0.3127  | 0.0880  |
| 1094 | S-531_Q433 Q43353   | Receptor-interac RIPK2 CARDI    | -1.3595 | -1.7002 | -1.1430 | -1.0342 | -1.1875 | -1.5295 | -1.1693 | -1.3748 | -1.6033 | -1.3591 |
| 1095 | S-531_Q9NY Q9NYF8   | Bcl-2-associated BCLAF1 BTF     | 0.5297  | 0.4718  | 0.4853  | 0.3137  | 0.1887  | 0.1510  | 0.4157  | 0.2114  | 0.4115  | 0.4506  |
| 1096 | S-534_Q8IW Q8IWI9   | MAX gene-associ MGA KIAA05      | -0.7916 | -0.6966 | -0.3238 | -0.2123 | -0.1219 | -0.3145 | -0.0104 | -0.4232 | -0.1221 | -0.2710 |
| 1097 | S-536_Q9UL Q9ULM3   | YEATS domain-cc YEATS2 KIAA     | -2.0182 | -1.7552 | -0.0307 | -0.0599 | 0.1090  | 0.2406  | 0.6913  | 0.5236  | 0.3123  | 0.2358  |
| 1098 | S-537_Q020 Q02040   | A-kinase anchor AKAP17A CX      | 0.2485  | 0.4089  | 0.5112  | 0.6796  | 0.5624  | 0.5076  | 0.5966  | 0.5214  | 0.3495  | 0.4487  |
| 1099 | S-538_Q149 Q14978   | Nucleolar and co NOLC1 KIAA     | 1.2232  | 1.2251  | 0.4994  | 0.8233  | 0.9117  | 0.7958  | 0.9349  | 0.8453  | 0.5512  | 0.5507  |
| 1100 | S-539_Q9H6 Q9H6Z4   | Ran-binding prot RANBP3         | -0.1404 | 0.0000  | -0.1269 | -0.1617 | -0.2150 | 0.0309  | -0.1825 | 0.0015  | -0.0748 | 0.0255  |
| 1101 | S-539_Q9Y4 Q9Y4E1   | WASH complex s WASHC2C F        | -0.1651 | -0.1181 | 0.0674  | 0.0128  | -0.4445 | -0.1896 | -0.2279 | -0.1140 | 0.0298  | 0.0024  |
| 1102 | S-54_Q8TAC Q8TAD8   | Smad nuclear-int SNIP1          | -0.6402 | -0.5516 | -0.8247 | -0.9806 | -0.7069 | -0.7197 | -0.6768 | -1.0372 | -1.0196 | -0.4493 |
| 1103 | S-544_Q131 Q13144   | Translation initia EIF2B5 EIF2E | 0.8745  | 0.5158  | -0.7935 | -0.6192 | -0.4240 | -0.9134 | -0.0262 | -0.4459 | -0.7531 | -0.8826 |
| 1104 | S-544_Q9Y3 Q9Y3L3   | SH3 domain-binc SH3BP1          | 0.5627  | 0.4233  | 0.7844  | 0.5454  | 0.5879  | 0.6553  | 0.5523  | 0.7411  | 0.5888  | 0.4461  |
| 1105 | S-5448_Q09 Q09666   | Neuroblast differ AHNAK PM2     | -0.8074 | -0.7778 | -0.3582 | -0.0071 | -0.4691 | -0.3463 | -0.4630 | -0.3532 | -1.3337 | -1.0039 |
| 1106 | S-545_Q602 Q60216   | Double-strand-bi RAD21 HR21     | -2.0432 | -1.9185 | -2.5271 | -1.9190 | -1.7005 | -2.8171 | -1.7867 | -2.6779 | -2.1353 | -1.9144 |
| 1107 | S-545_Q8W Q8WYA6    | Beta-catenin-like CTNNBL1 C2    | 0.5862  | 1.0022  | -0.3826 | 0.0351  | -0.1482 | 0.2087  | -0.1634 | -0.0325 | -0.2293 | -0.2633 |
| 1108 | S-546_Q134 Q13427   | Peptidyl-prolyl ci PPIG         | 0.5196  | 0.7352  | 0.3677  | 0.5263  | 0.8229  | 0.4445  | 0.4851  | 0.5520  | 0.3289  | 0.6532  |
| 1109 | S-546_Q150 Q15022   | Polycomb protei SUZ12 CHET      | 0.2531  | 0.1592  | 0.3571  | 0.2221  | 0.0551  | 0.3449  | 0.3294  | 0.2285  | 0.3818  | 0.2215  |
| 1110 | S-546_Q8TE Q8TEH3   | DENN domain-cc DENND1A F        | -2.0553 | -2.1777 | -1.5642 | -1.3644 | -1.8723 | -1.2816 | -1.5252 | -1.3948 | -1.7270 | -1.6427 |
| 1111 | S-547_Q5JS F Q5JSP0 | FYVE, RhoGEF an FGD3 ZFYVE      | 1.4272  | 1.3824  | 1.5808  | 1.6247  | 1.6716  | 1.7546  | 1.6837  | 1.6507  | 1.6214  | 1.2341  |
| 1112 | S-547_Q8N2 Q8N2M8   | CLK4-associating CLASRP SFR5    | 1.3884  | 1.2989  | 1.2577  | 1.1936  | 1.1167  | 1.0251  | 1.1712  | 1.2272  | 1.2392  | 0.9576  |
| 1113 | S-547_Q9H1 Q9H1B7   | Probable E3 ubiq IRF2BPL C14    | 0.4657  | 0.6678  | 0.9597  | 1.2221  | 0.7014  | 0.6222  | 0.4312  | 0.3438  | 0.7336  | 0.6760  |
| 1114 | S-547_Q9NC Q9NQC7   | Ubiquitin carbox CYLD CYLD1     | -0.8655 | -1.0507 | -1.1019 | -1.3104 | -1.4539 | -1.1636 | -1.2535 | -1.2716 | -1.4893 | -1.5307 |
| 1115 | S-549_Q953 Q95365   | Zinc finger and B ZBTB7A FBI1   | 0.9513  | 1.0116  | 0.8337  | 0.7309  | 0.6957  | 0.7130  | 0.7915  | 0.6575  | 0.3698  | 0.4906  |
| 1116 | S-549_Q9U F Q9UHB7  | AF4/FMR2 family AFF4 AF5Q3      | -3.1645 | -2.4834 | -2.4116 | -2.2799 | -2.1959 | -2.4542 | -2.2659 | -2.1892 | -2.2822 | -2.4232 |
| 1117 | S-55_Q96FS Q96FS4   | Signal-induced pi SIPA1 SPA1    | 0.1493  | 0.2763  | 0.3894  | 0.1598  | 0.4251  | 0.2215  | 0.3621  | 0.3970  | 0.1090  | 0.1490  |
| 1118 | S-550_Q9Y3 Q9Y3L3   | SH3 domain-binc SH3BP1          | 0.4683  | 0.3862  | 0.2307  | 0.0455  | 0.2112  | 0.2164  | 0.3139  | 0.3818  | 0.2773  | 0.5088  |
| 1119 | S-552_Q149 Q14966   | Zinc finger protei ZNF638 NP2   | -0.1069 | -0.3420 | -0.0307 | -0.2994 | -0.2431 | -0.2007 | 0.0709  | -0.2698 | -0.2022 | -0.1735 |
| 1120 | S-553_P371 P37173   | TGF-beta receptr TGFBR2         | -0.1128 | -0.2081 | 0.1367  | 0.1309  | 0.2223  | 0.4046  | 0.3449  | 0.4415  | 0.7737  | 0.6024  |
| 1121 | S-553_Q9NV Q9NWH9   | SAFB-like transcr SLTM MET      | 1.1695  | 1.0723  | 0.5617  | 0.5126  | 0.9029  | 0.8685  | 0.9698  | 1.0686  | 0.7139  | 0.6401  |
| 1122 | S-554_P278 P27824   | Calnexin (IP90) (I CANX         | 1.2606  | 1.7910  | 0.2191  | 0.4938  | 0.0780  | -0.2076 | 0.6514  | -0.0785 | -0.5040 | -0.4493 |
| 1123 | S-554_Q150 Q15027   | Arf-GAP with coil ACAP1 CENT    | 0.7173  | 0.5502  | 1.1785  | 0.9326  | 0.8710  | 1.0668  | 1.1456  | 0.8946  | 0.7933  | 0.6647  |
| 1124 | S-558_Q9Y2 Q9Y2K7   | Lysine-specific de KDM2A CXX1   | 0.1096  | 0.1462  | -0.0653 | -0.0089 | -0.1441 | 0.1762  | -0.2753 | -0.1345 | -0.1579 | 0.0090  |
| 1125 | S-56_Q9575 Q95758   | Polypyrimidine tr PTBP3 ROD1    | -1.9537 | -1.9682 | -1.3436 | -0.9528 | -1.4240 | -1.3035 | -1.8048 | -1.7027 | -1.5954 | -1.6070 |
| 1126 | S-56_P1640 P16402   | Histone H1.3 (Hi: H1-3 H1F3 H   | -0.3414 | -0.2529 | -0.1910 | -0.0887 | 0.0299  | -0.0956 | -0.1944 | -0.0782 | -0.1830 | -0.0789 |
| 1127 | S-56_Q5VZF Q5VZF2   | Muscleblind-like MBLN2 MBL      | -1.2015 | -1.6299 | -1.2140 | -1.2842 | -1.6308 | -1.0240 | -0.9987 | -1.6538 | -1.4111 | -1.1706 |
| 1128 | S-56_Q9Y5S Q9Y5S9   | RNA-binding pro RBM8A RBM       | -0.2805 | -0.1640 | -0.2875 | -0.1128 | -0.4717 | 0.0626  | -0.2927 | -0.0046 | -0.0638 | -0.0875 |
| 1129 | S-560_Q150 Q15014   | Zinc finger protei ZNF609 KIAA  | -1.1890 | -1.1479 | -0.9186 | -0.7387 | -0.6110 | -1.0608 | -0.5960 | -0.5811 | -0.4930 | -0.3891 |
| 1130 | S-560_Q149 Q14966   | Zinc finger protei ZNF638 NP2   | -3.2827 | -3.1878 | -0.6356 | -0.8954 | -1.0902 | -0.7544 | -0.5364 | -0.5926 | -0.3786 | -0.1954 |
| 1131 | S-560_Q96F Q96FV9   | THO complex sub THOC1 HPR1      | -0.0478 | 0.3248  | -0.1234 | 0.0644  | -0.2695 | -0.3711 | -0.1519 | -0.0915 | -0.0422 | 0.2553  |



|      |             |            |                    |               |         |         |         |         |         |         |         |         |         |         |
|------|-------------|------------|--------------------|---------------|---------|---------|---------|---------|---------|---------|---------|---------|---------|---------|
| 1132 | S-560_Q9Y4  | Q9Y4W2     | Ribosomal bioge    | LAS1L MSTP    | -1.0515 | -0.4498 | -1.1269 | -1.2248 | -1.0251 | -1.1177 | -1.1290 | -1.4818 | -1.1992 | -1.0378 |
| 1133 | S-561_Q5JS  | Q5JSH3     | WD repeat-cont     | WDR44         | 0.8405  | 0.9418  | -0.4713 | -0.0975 | -0.2023 | -0.2907 | -0.1707 | 0.0302  | -0.3141 | -0.4724 |
| 1134 | S-562_Q8NI  | Q8NDT2     | Putative RNA-bir   | RBM15B OT     | -0.5135 | -0.7797 | 0.3398  | 0.2627  | 0.4114  | 0.4158  | 0.0930  | 0.2696  | 0.1246  | -0.0103 |
| 1135 | S-563_P193  | P19338     | Nucleolin (Protei  | NCL           | 1.3605  | 1.5742  | 0.9816  | 0.9465  | 0.7742  | 0.6781  | 0.7635  | 0.6261  | 0.6696  | 0.7015  |
| 1136 | S-563_Q150  | Q15059     | Bromodomain-cc     | BRD3 KIAA0    | 0.0108  | -0.1566 | -0.0997 | -0.3304 | -0.2453 | -0.0331 | -0.2659 | -0.1753 | 0.0473  | -0.1764 |
| 1137 | S-563_Q5T5  | Q5T5Y3     | Calmodulin-regu    | CAMSAP1       | -0.5161 | -0.6594 | -0.4611 | -0.6029 | -0.5423 | -0.4998 | -0.3462 | -0.4501 | -0.5643 | -0.6307 |
| 1138 | S-564_P278  | P27824     | Calnexin (IP90) (I | CANX          | 1.1403  | 1.1442  | -0.2647 | 0.4025  | -0.1482 | -0.4081 | 0.4484  | -0.0466 | -0.9080 | -0.9018 |
| 1139 | S-564_Q6PJ  | Q6PJ19     | GATOR complex      | WDR59 KIAA    | 0.0304  | 0.2790  | 0.1185  | 0.0644  | 0.1952  | 0.4213  | 0.0882  | 0.0152  | 0.0735  | 0.0468  |
| 1140 | S-564_Q9C0  | Q9C0I1     | Myotubularin-re    | MTMR12 KIA    | 0.7173  | 0.7817  | 1.3934  | 1.0150  | 1.0771  | 0.7941  | 1.0906  | 0.8963  | 0.4261  | 0.2714  |
| 1141 | S-564_Q9NF  | Q9NRA8     | Eukaryotic transl  | EIF4ENIF1     | -1.1726 | -1.1382 | -1.3569 | -1.5189 | -1.8064 | -1.7173 | -1.5516 | -2.0372 | -1.4391 | -1.6267 |
| 1142 | S-565_P295  | P29590     | Protein PML (Pro   | PML MYL PP    | -0.0934 | -0.3032 | -0.3596 | -0.4228 | -0.2851 | -0.7645 | -0.3846 | -0.4733 | -0.5096 | -0.2602 |
| 1143 | S-567_Q6V   | Q6VMQ6     | Activating transc  | ATF7IP MCA    | -3.2652 | -2.1431 | -1.1757 | -1.3735 | -1.3284 | -1.4624 | -2.2848 | -1.2388 | -1.0844 | -1.1306 |
| 1144 | S-568_Q86U  | Q86UE4     | Protein LYRIC (3E  | MTDH AEG1     | -0.9573 | -0.9026 | -0.7737 | -0.8724 | -1.0942 | -0.8477 | -1.1751 | -0.8940 | -0.5022 | -0.9114 |
| 1145 | S-569_Q151  | Q15111     | Inactive phospho   | PLCL1         | 0.2424  | 0.4427  | 0.1946  | 0.3109  | 0.3228  | 0.5820  | 0.2939  | 0.2671  | 0.3165  | 0.2336  |
| 1146 | S-569_Q926  | Q92619     | Rho GTPase-activ   | ARHGAP45 F    | -0.7761 | -0.7237 | -1.0349 | -1.1315 | -0.9531 | -1.0796 | -1.0447 | -1.2051 | -1.2219 | -0.9689 |
| 1147 | S-57_P2935  | P29350     | Tyrosine-protein   | PTPN6 HCP I   | 0.1612  | -0.0064 | -0.1264 | 0.1086  | -0.1048 | 0.1105  | 0.1284  | -0.1504 | -0.0952 | -0.1661 |
| 1148 | S-57_Q8WU   | Q8WUQ7     | Cactin (Renal car  | CACTIN C19C   | -4.8854 | -4.2815 | -3.4511 | -4.3782 | -4.7558 | -4.6739 | -3.2597 | -3.5789 | -3.2202 | -2.6387 |
| 1149 | S-572_Q166  | Q16666     | Gamma-interfero    | IFI16 IFNGIP  | 0.0945  | 0.2079  | -0.0774 | 0.1518  | -0.4190 | -0.1973 | -0.7756 | -0.7380 | -0.2602 | -0.4423 |
| 1150 | S-573_Q151  | Q15117     | FYN-binding prot   | FYB1 FYB SL   | 0.6077  | 0.5072  | 0.2590  | 0.3037  | -0.0458 | 0.2961  | 0.2032  | 0.3570  | 0.5423  | -0.0129 |
| 1151 | S-573_Q147  | Q14738     | Serine/threonine   | PPP2R5D       | 0.3793  | 0.2050  | 1.1877  | 0.9148  | 1.0814  | 1.1775  | 1.0942  | 1.0053  | 1.1071  | 0.9442  |
| 1152 | S-575;588_P | P52272;P52 | Heterogeneous r    | HNRNPM HM     | 0.0000  | -0.4184 | 0.1780  | 0.3209  | 0.4536  | 0.4001  | 0.2443  | 0.5415  | 0.1435  | 0.1339  |
| 1153 | S-576_Q145  | Q14526     | F-BAR domain or    | FCHO1 KIAA    | -0.5634 | -0.6948 | -0.4626 | 0.0194  | -0.2497 | -0.2162 | 0.0833  | -0.1013 | -0.4111 | -0.3281 |
| 1154 | S-576_Q150  | Q15014     | Zinc finger protei | ZNF609 KIAA   | 0.0945  | 0.4900  | 0.4195  | 0.0863  | 0.5064  | 0.6809  | 0.2043  | 0.4370  | 0.7242  | 0.5454  |
| 1155 | S-576_P260  | P26038     | Moesin (Membr      | MSN           | -0.2161 | -0.4726 | -0.4684 | -0.8888 | -0.4514 | -0.0195 | -0.3914 | -0.1462 | 0.0078  | -0.3024 |
| 1156 | S-576_Q146  | Q14694     | Ubiquitin carbox   | USP10 KIAA    | -0.3711 | -0.6541 | -0.7917 | -0.6357 | -0.8961 | -0.8133 | -0.8346 | -0.7077 | -0.8624 | -1.3329 |
| 1157 | S-5763_Q09  | Q09666     | Neuroblast differ  | AHNAK PM2     | 1.6177  | 1.4924  | 1.7941  | 1.6561  | 1.5045  | 1.8238  | 1.5715  | 1.6628  | 1.6651  | 1.5151  |
| 1158 | S-578_Q7LD  | Q7LDG7     | RAS guanyl-relea   | RASGRP2 CC    | -1.4114 | -1.2896 | -1.0930 | -1.1205 | -1.6138 | -0.9589 | -1.3965 | -1.1753 | -0.7954 | -0.9707 |
| 1159 | S-578_Q8N3  | Q8N3F8     | MICAL-like prote   | MICALL1 KIA   | 0.5057  | 0.4378  | 0.5568  | 0.4567  | 0.7613  | 0.8595  | 0.4350  | 0.6853  | 0.7684  | 0.5802  |
| 1160 | S-579_Q6U   | Q6UN15     | Pre-mRNA 3'-enc    | FIP1L1 FIP1 I | -1.2871 | -1.2496 | -0.7845 | -0.6949 | -1.1340 | -0.5643 | -1.0091 | -0.7329 | -0.6577 | -0.8970 |
| 1161 | S-58_P6017  | P60174     | Triosephosphate    | TP11 TPI      | 1.5343  | 1.3497  | 1.4771  | 1.3589  | 1.4003  | 1.4954  | 1.3913  | 1.5224  | 1.3241  | 1.3451  |
| 1162 | S-58_Q9NU   | Q9NUV9     | GTPase IMAP fan    | GIMAP4 IAN    | 1.2447  | 1.1886  | 1.6893  | 1.5294  | 1.5052  | 1.6207  | 1.6751  | 1.6891  | 1.7680  | 1.5392  |
| 1163 | S-582_Q8IV  | Q8IV53     | DENN domain-cc     | DENND1C FA    | 0.0126  | 0.2998  | -0.4568 | -0.7537 | -0.8259 | -1.2007 | -0.5103 | -0.9490 | -0.9203 | -0.7383 |
| 1164 | S-583_P278  | P27824     | Calnexin (IP90) (I | CANX          | 1.1196  | 1.3662  | 0.3530  | 0.4159  | 0.1277  | -0.1226 | 0.2421  | -0.2809 | -0.4893 | -0.4027 |
| 1165 | S-583_P497  | P49756     | RNA-binding pro    | RBM25 RNP     | 0.2131  | 0.7212  | -0.1269 | 0.2145  | -0.3009 | -0.5381 | 0.0334  | -0.3377 | -0.4008 | -0.1793 |
| 1166 | S-5830_Q09  | Q09666     | Neuroblast differ  | AHNAK PM2     | -0.5396 | -0.8221 | 1.4323  | 0.6482  | 0.8456  | -0.2494 | 1.1279  | 0.4074  | -0.1873 | -0.3690 |
| 1167 | S-5841_Q09  | Q09666     | Neuroblast differ  | AHNAK PM2     | 0.5221  | 0.7746  | 0.3958  | 0.4900  | 0.1005  | 0.4971  | -0.0787 | 0.6863  | -0.1507 | -0.4885 |
| 1168 | S-585_Q926  | Q92608     | Dedicator of cytc  | DOCK2 KIAA    | -2.4308 | -2.3032 | -1.8027 | -1.8056 | -2.0592 | -1.9970 | -1.6664 | -2.0882 | -1.6930 | -1.7863 |
| 1169 | S-586_P356  | P35611     | Alpha-adducin (E   | ADD1 ADDA     | 0.3197  | -0.1421 | 0.0941  | 0.5748  | 0.3605  | 0.1120  | 0.4050  | 0.4143  | 0.8025  | 0.9262  |
| 1170 | S-587_Q7LD  | Q7LDG7     | RAS guanyl-relea   | RASGRP2 CC    | -0.8491 | -0.5712 | -0.4583 | -0.4787 | -0.3123 | -0.4665 | 0.0065  | -0.4439 | -0.5701 | -0.4458 |

|      |                    |                                |         |         |         |         |         |         |         |         |         |         |
|------|--------------------|--------------------------------|---------|---------|---------|---------|---------|---------|---------|---------|---------|---------|
| 1171 | S-588_P518: P51825 | AF4/FMR2 family AFF1 AF4 FE    | -2.7948 | -3.5927 | -2.7210 | -2.7328 | -2.4845 | -2.4956 | -2.7339 | -2.1013 | -2.8389 | -2.7297 |
| 1172 | S-59_P0804: P08047 | Transcription fac SP1 TSFP1    | -0.6687 | -0.1068 | 0.9093  | 1.3965  | 0.0265  | -0.0060 | -0.1022 | -1.1479 | -0.2233 | -0.2373 |
| 1173 | S-59_Q0083 Q00839  | Heterogeneous r HNRNPU C1      | -0.3595 | -0.5163 | -0.3225 | -0.7210 | -0.5477 | -0.8857 | -0.5252 | -0.1770 | -0.6332 | -0.3040 |
| 1174 | S-59_Q8WU Q8WUQ7   | Cactin (Renal car CACTIN C19   | -1.3641 | -1.3308 | -1.0190 | -0.7718 | -0.9378 | -1.1703 | -0.7579 | -0.9255 | -1.2664 | -1.0511 |
| 1175 | S-59_Q9UBE Q9UBB9  | Tuftelin-interacti TFIP11 STIP | -1.4504 | -1.4347 | -1.4171 | -1.3552 | -1.5105 | -1.4789 | -1.7557 | -1.7228 | -1.3939 | -1.2358 |
| 1176 | S-590_Q9H4 Q9H4E7  | Differentially exp DEF6 IBP    | -0.8010 | -0.8821 | 0.6344  | 0.1243  | 0.2191  | -0.1307 | 0.3581  | 0.0932  | -0.0775 | -0.4027 |
| 1177 | S-590_Q9NS Q9NSK0  | Kinesin light chai KLC4 KNSL8  | -0.2309 | -0.2910 | 0.0010  | 0.0661  | -0.1120 | 0.0540  | -0.1943 | -0.1029 | -0.0104 | -0.0325 |
| 1178 | S-591_O005 O00567  | Nucleolar protein NOP56 NOL    | 0.6897  | 1.4240  | 1.5275  | 1.5116  | 2.0501  | 1.7105  | 2.0061  | 2.0673  | 1.4336  | 1.1784  |
| 1179 | S-592_O155 O15523  | ATP-dependent f DDX3Y DBY      | -0.8523 | -1.2549 | -1.3382 | -1.3148 | -1.5158 | -1.8666 | -1.1148 | -1.1513 | -1.3045 | -1.2977 |
| 1180 | S-592_Q9UE Q9UBT2  | SUMO-activating UBA2 SAE2 U    | -2.0255 | -1.9256 | -1.6146 | -1.8056 | -1.6831 | -1.8720 | -2.0569 | -1.9460 | -1.6888 | -1.9961 |
| 1181 | S-5943_Q8N Q8NF91  | Nesprin-1 (Enapt SYNE1 C6orf   | -0.3251 | -0.5306 | -0.1557 | -0.2627 | -0.1708 | -0.0561 | -0.2927 | -0.3610 | -0.3190 | -0.0903 |
| 1182 | S-595_O608 O60841  | Eukaryotic transl EIF5B IF2 KI | -0.9022 | -0.6541 | -0.5080 | -0.8087 | -0.3995 | -0.6457 | -0.7040 | -0.6854 | -0.6053 | -0.8685 |
| 1183 | S-596_Q9Y3 Q9Y3L3  | SH3 domain-binc SH3BP1         | 0.6475  | 0.6481  | -0.1314 | -0.0842 | -0.2044 | -0.3257 | -0.1504 | -0.2716 | 0.1978  | 0.3762  |
| 1184 | S-597_Q9H4 Q9H4E7  | Differentially exp DEF6 IBP    | -0.4728 | -0.5633 | 0.1057  | -0.0582 | -0.1345 | -0.0674 | -0.3429 | -0.0030 | 0.2779  | 0.0442  |
| 1185 | S-598_Q029 Q02952  | A-kinase anchor AKAP12 AKA     | -0.3228 | -0.3128 | -0.2773 | -0.3898 | 0.2175  | 0.2266  | -0.3829 | -0.3185 | 0.0232  | -0.0286 |
| 1186 | S-6_P09651 P09651  | Heterogeneous r HNRNPA1 H      | 1.1362  | 1.1128  | 0.4957  | 0.9214  | 0.4183  | 0.5820  | 0.5610  | 0.5850  | 0.4491  | 0.5042  |
| 1187 | S-6_Q9Y3Z3 Q9Y3Z3  | Deoxynucleoside SAMHD1 MC      | -0.6041 | -1.4928 | 0.0655  | 0.0053  | 0.1920  | -0.4502 | 0.4739  | 0.2233  | -0.6536 | -0.6129 |
| 1188 | S-60_O0050 O00505  | Importin subunit KPNA3 QIP2    | 0.3724  | 0.2616  | 0.4680  | 0.4025  | 0.3678  | 0.4001  | 0.0783  | 0.2479  | 0.2622  | 0.1078  |
| 1189 | S-60_Q8N68 Q8N684  | Cleavage and pol CPSF7         | 1.6480  | 1.6127  | 0.5723  | 0.8192  | 0.7081  | 0.6193  | 1.0535  | 0.7367  | 0.6415  | 0.3573  |
| 1190 | S-60_Q8N6F Q8N6F7  | Germinal center- GCSAM GAL NA  |         | NA      | NA      | NA      | -5.2919 | -4.9676 | -5.2597 | -6.2977 | -5.7227 | -5.0013 |
| 1191 | S-600_Q7Z4 Q7Z460  | CLIP-associating CLASP1 KIAA   | 1.4916  | 1.4427  | 1.5525  | 1.3802  | 1.2000  | 1.5002  | 1.4781  | 1.3225  | 1.1228  | 0.7321  |
| 1192 | S-601_Q8N4 Q8N4C8  | Misshapen-like k MINK1 B5 I    | -0.0666 | -0.0611 | 0.8284  | 1.2045  | 0.5103  | 0.6892  | 0.7001  | 0.6350  | -0.4111 | -0.4215 |
| 1193 | S-602_Q9BZ Q9BZQ8  | Protein Niban 1 ( NIBAN1 C1o   | -0.8814 | -0.8843 | -0.3855 | -0.3911 | -0.9203 | -0.6774 | -0.8095 | -0.7750 | -1.4168 | -1.4309 |
| 1194 | S-604_Q154 Q15424  | Scaffold attachm SAFB HAP HI   | 1.5994  | 1.4896  | 1.3693  | 1.3073  | 1.3258  | 1.4241  | 1.3906  | 0.9660  | 1.2703  | 0.9342  |
| 1195 | S-607_Q9NF Q9NRH2  | SNF-related serir SNRK KIAAO   | -1.5634 | -1.3732 | -1.4655 | -1.9562 | -1.5914 | -1.4956 | -1.6872 | -1.4191 | -1.4820 | -1.7254 |
| 1196 | S-608_P460: P46063 | ATP-dependent l RECQL RECC     | -2.0780 | -1.9989 | -1.6372 | -1.2799 | -1.2829 | -1.3711 | -1.0065 | -1.0625 | -1.6638 | -1.4198 |
| 1197 | S-61_Q9H1E Q9H1E3  | Nuclear ubiquito NUCKS1 NU     | -0.0991 | -0.2030 | -0.0874 | 1.2290  | 0.9019  | 0.2023  | 0.2509  | 0.6281  | -0.0263 | 0.5178  |
| 1198 | S-61_Q9H4C Q9H400  | Lck-interacting tr LIME1 LIME  | -1.3456 | -1.1164 | -0.6903 | -0.5787 | -0.6279 | -0.5820 | -0.5308 | -0.6586 | -0.9376 | -0.6031 |
| 1199 | S-61_Q9UH: Q9UH62  | Armadillo repeat ARM CX3 ALI   | 0.4955  | 0.1602  | 0.5968  | 0.5796  | 0.3214  | 0.5201  | 0.3662  | 0.3534  | 0.3848  | 0.3370  |
| 1200 | S-611_Q9UK Q9UKN8  | General transcrip GTF3C4       | 0.1213  | -0.0067 | -0.0752 | -0.1439 | -0.2851 | -0.1017 | -0.1913 | 0.1202  | 0.0473  | 0.2215  |
| 1201 | S-614_Q9BY Q9BYW2  | Histone-lysine N- SETD2 HIF1 I | -2.1089 | -2.2869 | -1.5155 | -1.4156 | -1.6713 | -1.5167 | -1.0815 | -1.4860 | -1.5376 | -1.4795 |
| 1202 | S-617_Q5H9 Q5H9R7  | Serine/threonine PPP6R3 C11    | -0.5297 | -0.7994 | 0.1279  | 0.1979  | 0.0154  | 0.1962  | -0.3147 | -0.0562 | 0.1392  | -0.0212 |
| 1203 | S-6175_Q8N Q8NF91  | Nesprin-1 (Enapt SYNE1 C6orf   | -0.2937 | -0.2655 | 0.1547  | 0.1112  | 0.0901  | 0.0324  | -0.1219 | -0.1211 | 0.0599  | 0.1397  |
| 1204 | S-619_O433 O43395  | U4/U6 small nuc PRPF3 HPRP     | -0.5110 | -0.4928 | -0.3977 | -0.5472 | -0.3169 | -0.2780 | -0.5765 | -0.2883 | -0.5566 | -0.7447 |
| 1205 | S-619_P193: P19338 | Nucleolin (Protei NCL          | -0.2035 | -0.1272 | -0.5351 | -0.4936 | -0.7620 | -0.5082 | -0.7019 | -0.2370 | -0.3652 | -0.3152 |
| 1206 | S-619_Q7KZ Q7KZI7  | Serine/threonine MARK2 EMK     | -1.3228 | -1.3225 | -1.3303 | -1.4541 | -1.8723 | -1.3071 | -1.2566 | -1.3988 | -1.3304 | -1.2726 |
| 1207 | S-62_Q6UU Q6UUUV7  | CREB-regulated t CRT C3 TORC   | 0.0000  | 0.0252  | -1.2863 | -0.3782 | -1.2784 | -0.3350 | -0.3412 | -0.4606 | -0.2853 | -0.9432 |
| 1208 | S-62_Q8NFC Q8NFG4  | Folliculin (BHD sk FLCN BHD    | 0.4552  | 0.7151  | 0.4077  | -0.0397 | 0.2411  | 0.2791  | 0.4147  | 0.3232  | 0.4026  | 0.1834  |
| 1209 | S-62_Q96E0 Q96E09  | Protein FAM122/ FAM122A C      | -0.9225 | -1.0764 | -0.7329 | -0.7448 | -0.5822 | -0.6177 | -0.6718 | -0.6092 | -0.7107 | -0.8689 |

|      |                    |                               |         |         |         |         |         |         |         |         |         |         |
|------|--------------------|-------------------------------|---------|---------|---------|---------|---------|---------|---------|---------|---------|---------|
| 1210 | S-62_Q9Y3C Q9Y3Q8  | TSC22 domain fa TSC22D4 TH    | -0.4129 | -0.6174 | -0.4595 | -0.1270 | -0.1064 | -0.4461 | -0.0499 | -0.2681 | -0.3410 | -0.1374 |
| 1211 | S-620_P426I P42684 | Tyrosine-protein ABL2 ABLL A  | -1.0366 | -1.1333 | -0.9486 | -0.9597 | -0.9378 | -0.9881 | -0.9781 | -0.8410 | -0.8766 | -1.1504 |
| 1212 | S-620_Q6PJ Q6PJT7  | Zinc finger CCCH ZC3H14       | 0.0911  | 0.2689  | 0.4443  | 0.7028  | 0.2780  | 0.2368  | 0.4167  | 0.1439  | -0.0706 | -0.2013 |
| 1213 | S-621_Q8N3 Q8N3F8  | MICAL-like prote MICALL1 KIA  | 0.5209  | 0.6196  | -0.2398 | -0.1013 | -0.1544 | -0.2565 | -0.0355 | -0.2352 | -0.2157 | 0.0813  |
| 1214 | S-623_P529 P52948  | Nuclear pore cor NUP98 ADAI   | 0.3356  | 0.3520  | -0.0609 | 0.2508  | 0.2270  | 0.1722  | 0.1701  | 0.1549  | 0.1186  | 0.1902  |
| 1215 | S-624_O954 O95466  | Formin-like protε FMNL1 C17c  | 1.9124  | 2.2308  | 1.1571  | 1.5772  | 1.5116  | 1.1212  | 1.6873  | 1.4291  | 0.9409  | 1.1823  |
| 1216 | S-624_P527 P52756  | RNA-binding pro RBM5 H37 L    | -0.3552 | -0.2016 | -0.4927 | -0.5377 | -0.3906 | -0.4303 | -0.5130 | -0.6152 | -0.3679 | -0.2343 |
| 1217 | S-624_Q53E Q53ET0  | CREB-regulated t CRTC2 TORC   | -0.0255 | 0.0490  | 0.3332  | 0.4226  | -0.0176 | 0.3865  | 0.2065  | 0.2337  | 0.2643  | 0.3381  |
| 1218 | S-625_Q7Z4 Q7Z4V5  | Hepatoma-deriv HDGFL2 HDC     | -3.7823 | -3.3364 | -2.9608 | -2.6412 | -3.7558 | -2.8884 | -3.1634 | -2.9169 | -2.9858 | -2.6876 |
| 1219 | S-625_Q9NX Q9NXH9  | tRNA (guanine(2) TRMT1        | -0.5959 | -0.4574 | -0.9730 | -1.1479 | -1.1219 | -1.1017 | -1.0302 | -1.2753 | -1.4967 | -1.3591 |
| 1220 | S-627_Q150 Q15025  | TNFAIP3-interact TNIP1 KIAA0  | -1.1167 | -1.2339 | -0.8528 | -1.4062 | -1.4289 | -0.7148 | -1.0275 | -0.7380 | -0.9326 | -1.1764 |
| 1221 | S-628_Q8N9 Q8N9T8  | Protein KRI1 hon KRI1         | -0.0246 | -0.2002 | -0.4431 | -0.8049 | -0.2344 | -0.0610 | -0.1583 | -0.0315 | -0.4642 | -0.3449 |
| 1222 | S-628_Q926 Q92625  | Ankyrin repeat a ANKS1A ANI   | -1.4308 | -1.2522 | -1.1592 | -1.6412 | -1.1626 | -1.0180 | -1.1461 | -1.1046 | -0.9602 | -0.8406 |
| 1223 | S-63_Q1342 Q13422  | DNA-binding pro IKZF1 IK1 IK/ | -0.2569 | -0.1675 | -0.6742 | -0.7767 | -0.6799 | -0.7689 | -0.7145 | -0.7111 | -0.7013 | -0.6358 |
| 1224 | S-63_Q1344 Q13442  | 28 kDa heat- and PDAP1 HASF   | 0.3130  | 0.1093  | 0.7446  | 0.4019  | 0.5854  | 0.1931  | 0.0447  | 0.0676  | 1.2974  | 1.2692  |
| 1225 | S-63_Q6NXT Q6NXT1  | Ankyrin repeat d ANKRD54 LI/  | -1.4869 | -1.0945 | -0.7662 | -0.5453 | -0.7755 | -0.7386 | -0.7876 | -0.7926 | -0.9117 | -0.9165 |
| 1226 | S-630_Q7Z6 Q7Z6I6  | Rho GTPase-activ ARHGAP30     | 0.4459  | 0.7589  | -0.7684 | -0.4444 | -0.3055 | -0.3539 | -0.1634 | -0.5163 | -0.6152 | -0.6109 |
| 1227 | S-631_Q6PK Q6PKG0  | La-related protei LARP1 KIAAC | -0.4138 | -0.5387 | -0.6635 | -0.2842 | -0.7250 | -0.6597 | -0.6218 | -0.6659 | -0.2447 | -0.0247 |
| 1228 | S-631_Q928 Q92888  | Rho guanine nuc ARHGEF1       | 1.3675  | 1.2917  | 1.0280  | 0.6818  | 1.2128  | 1.0984  | 1.2896  | 1.2910  | 0.9876  | 0.5267  |
| 1229 | S-633_Q020 Q02040  | A-kinase anchor AKAP17A CX    | -0.8787 | -0.4959 | -0.6903 | -0.4614 | -0.0746 | -0.9852 | 0.4254  | -0.2624 | -1.1755 | -1.0378 |
| 1230 | S-633_Q9Y5 Q9Y520  | Protein PRRC2C ( PRRC2C BAT   | -1.3410 | -1.3703 | -0.7827 | -0.8954 | -0.8690 | -1.0953 | -0.1693 | -0.8714 | -1.5338 | -1.2479 |
| 1231 | S-634_Q146 Q14617  | AP-3 complex sul AP3D1 PROC   | -0.9433 | -1.0145 | -0.4312 | -0.6749 | -0.6082 | -0.5082 | -0.9452 | -0.6586 | -0.4303 | -0.1264 |
| 1232 | S-635_Q153 Q15320  | Melanoma inhibi MIA2 CTAGE    | 0.2993  | 0.3528  | 0.1481  | 0.2448  | -0.0477 | 0.1307  | 0.1631  | 0.0407  | 0.1435  | 0.1880  |
| 1233 | S-635_Q9UF Q9UPN7  | Serine/threonine PPP6R1 KIA/  | -2.8988 | -2.6472 | -2.2991 | -2.2206 | -2.5914 | -2.5643 | -2.7339 | -2.4564 | -2.4077 | -2.2914 |
| 1234 | S-637_Q018 Q01826  | DNA-binding pro SATB1         | -0.6481 | -0.3760 | -0.7527 | -0.3491 | -0.5299 | -0.5112 | -0.7734 | -0.6543 | -0.2293 | -0.0291 |
| 1235 | S-638_Q8IYE Q8IYB3 | Serine/arginine r SRRM1 SRM   | -0.5904 | -0.0926 | -0.7279 | -1.4015 | -0.6279 | -1.5643 | -0.5289 | -1.2280 | -0.7819 | 0.1686  |
| 1236 | S-638_Q9NV Q9NW82  | WD repeat-contε WDR70         | 0.3212  | 0.3177  | 0.5815  | 0.5361  | 0.6353  | 0.8112  | 0.4475  | 0.6681  | 0.9537  | 0.8009  |
| 1237 | S-638_Q9UF Q9UPN7  | Serine/threonine PPP6R1 KIA/  | -2.0553 | -2.0302 | -1.6668 | -1.5975 | -2.0065 | -1.7419 | -1.9884 | -1.8714 | -1.9704 | -1.5798 |
| 1238 | S-639_Q958 Q95819  | Mitogen-activate MAP4K4 HG    | -1.5528 | -1.6507 | -1.9445 | -2.3237 | -1.9203 | -1.9050 | -1.7912 | -1.9401 | -2.2696 | -2.0699 |
| 1239 | S-64_Q53QZ Q53QZ3  | Rho GTPase-activ ARHGAP15 E   | 0.2084  | 0.3571  | 0.6085  | 1.1502  | 0.5129  | 0.9047  | 0.8639  | 0.4837  | 0.4163  | 0.1548  |
| 1240 | S-64_Q9BPX Q9BPX5  | Actin-related prc ARPC5L      | 0.2317  | 0.2680  | 0.4179  | 0.4811  | 0.3848  | 0.5559  | 0.1243  | 0.3830  | 0.1029  | 0.3350  |
| 1241 | S-640_Q150 Q15052  | Rho guanine nuc ARHGEF6 CC    | -0.4653 | -0.3183 | -0.9305 | -1.0161 | -0.6166 | -0.9561 | -0.5707 | -0.8883 | -0.9451 | -0.8452 |
| 1242 | S-640_Q9UC Q9UGU0  | Transcription fac TCF20 KIAAC | 0.2651  | 0.2326  | 0.5374  | 0.3123  | 0.4279  | 0.3910  | 0.2704  | 0.2998  | 0.5125  | 0.4066  |
| 1243 | S-642_Q437 Q43719  | HIV Tat-specific f HTATSF1    | 0.2193  | 0.4354  | 0.1845  | -0.0197 | -0.1564 | 0.0163  | -0.0967 | 0.2141  | 0.4026  | 0.1571  |
| 1244 | S-645_P542 P54259  | Atrophin-1 (Dent ATN1 D12S7   | -0.1665 | -0.4169 | -0.1745 | -0.1167 | -0.1080 | -0.1703 | -0.1973 | 0.0242  | 0.0993  | -0.1954 |
| 1245 | S-647_Q926 Q92625  | Ankyrin repeat a ANKS1A ANI   | -0.1584 | -0.1504 | -0.5035 | -0.0507 | -0.2279 | -0.2128 | -0.3478 | -0.0705 | -0.1696 | -0.2192 |
| 1246 | S-648_Q9BV Q9BWT3  | Poly(A) polymerε PAPOLG PAF   | -0.8265 | -1.0189 | -0.6785 | -0.6863 | -0.6194 | -0.6715 | -0.7733 | -0.5517 | -0.5566 | -0.5837 |
| 1247 | S-648_Q9NY Q9NYF8  | Bcl-2-associated BCLAF1 BTF   | -0.4393 | -0.1046 | 0.3257  | 0.5474  | 0.3609  | 0.0442  | 0.1336  | 0.1573  | 0.2157  | 0.3331  |
| 1248 | S-65_P5270 P52701  | DNA mismatch rε MSH6 GTBP     | 0.1847  | 0.7465  | 1.1914  | 1.6857  | 1.8172  | 1.4152  | 1.3936  | 1.5305  | 1.4386  | 1.4896  |

|      |             |        |                                |         |         |         |         |         |         |         |         |         |         |
|------|-------------|--------|--------------------------------|---------|---------|---------|---------|---------|---------|---------|---------|---------|---------|
| 1249 | S-65_Q1515  | Q15154 | Pericentriolar ma PCM1         | -0.7334 | -0.6112 | 0.1900  | -0.1244 | -0.0883 | -0.1736 | -0.1389 | -0.1650 | -0.0276 | -0.2418 |
| 1250 | S-65_Q969E  | Q969E4 | Transcription elo TCEAL3 MST   | 0.5081  | 0.7275  | -0.3817 | -0.0697 | 0.3588  | 0.0416  | 0.2004  | 0.1302  | 0.1717  | 0.2133  |
| 1251 | S-65_Q96S5  | Q96S55 | ATPase WRNIP1 WRNIP1 WH        | -0.3663 | -0.3895 | -0.0741 | 0.0291  | 0.0837  | -0.2193 | -0.4207 | -0.1744 | 0.1289  | 0.1716  |
| 1252 | S-652_Q7Z4  | Q7Z417 | Nuclear fragile X NUFIP2 KIAA  | -0.1464 | -0.3239 | 0.5667  | 0.3890  | 0.1626  | 0.5128  | 0.0833  | 0.4650  | 0.3888  | 0.3812  |
| 1253 | S-652_Q7Z4  | Q7Z4V5 | Hepatoma-deriv HDGFL2 HDG      | -0.8721 | -0.8319 | -0.3436 | -0.1677 | -0.3850 | -0.5798 | -0.4017 | -0.4946 | -0.4042 | -0.4078 |
| 1254 | S-653_Q96R  | Q96RL1 | BRCA1-A comple UIMC1 RAPE      | -0.9643 | -0.8678 | -0.6852 | -1.0786 | -0.7373 | -0.8829 | -1.0489 | -0.7952 | -0.7378 | -0.4994 |
| 1255 | S-654_O602  | O60281 | Zinc finger protei ZNF292 KIAA | -0.2458 | -0.7219 | -0.6602 | -0.5629 | -0.3898 | -0.2007 | -0.1781 | -0.2262 | -0.6763 | -0.7169 |
| 1256 | S-656_Q994  | Q99490 | Arf-GAP with GTI AGAP2 CEN1    | -4.6402 | -4.3253 | -1.0318 | -1.7507 | -0.7159 | -0.4300 | -0.9704 | -0.6112 | -0.8067 | -0.8291 |
| 1257 | S-657_Q9H5  | Q9H501 | ESF1 homolog (A ESF1 ABTAP     | -1.2566 | -1.4451 | -1.2296 | -1.3671 | -1.2324 | -0.8568 | -1.3586 | -1.4122 | -0.9089 | -0.7946 |
| 1258 | S-657_Q9UK  | Q9UKV3 | Apoptotic chrom ACIN1 ACINI    | 1.3633  | 1.2411  | 1.4226  | 1.4528  | 1.1201  | 1.0583  | 1.1918  | 1.2466  | 1.5056  | 1.3391  |
| 1259 | S-658_Q8W'  | Q8WVCO | RNA polymerase LEO1 RDL        | -1.1325 | -1.1603 | -1.0126 | -0.8087 | -1.1462 | -1.1570 | -1.1605 | -1.1244 | -0.8273 | -0.9859 |
| 1260 | S-658_Q9NY  | Q9NYF8 | Bcl-2-associated BCLAF1 BTF    | -2.0403 | -2.3420 | -1.5185 | -1.9356 | -2.0746 | -1.8397 | -2.2411 | -1.8112 | -1.6232 | -1.5012 |
| 1261 | S-66_Q96B2  | Q96B23 | Uncharacterized C18orf25 AR    | 0.2363  | -0.0257 | -0.3867 | -0.3944 | 0.2064  | -0.5577 | -0.4435 | -0.6781 | -0.2680 | -0.1054 |
| 1262 | S-66_Q9H3C  | Q9H307 | Pinin (140 kDa n PNN DRS ME    | 0.8068  | 0.7285  | 1.2906  | 1.1725  | 1.1960  | 1.2139  | 1.2693  | 1.4639  | 1.0328  | 0.7313  |
| 1263 | S-660_Q9NF  | Q9NPG3 | Ubinuclein-1 (HIF UBN1         | -1.4211 | -1.2681 | -1.1733 | -1.5975 | -1.7190 | -1.1703 | -1.2535 | -1.8603 | -1.2052 | -1.1533 |
| 1264 | S-663_P166: | P16615 | Sarcoplasmic/en ATP2A2 ATP     | -0.6179 | -1.0100 | -0.8229 | -0.7094 | -0.6801 | -1.0392 | -0.9131 | -0.8742 | -0.7142 | -0.4493 |
| 1265 | S-663_Q9H5  | Q9H501 | ESF1 homolog (A ESF1 ABTAP     | -0.2805 | -0.4228 | -0.2901 | -0.3991 | -0.3470 | -0.1049 | -0.3462 | -0.2606 | -0.0982 | -0.0739 |
| 1266 | S-664_Q7Z4  | Q7Z4V5 | Hepatoma-deriv HDGFL2 HDG      | -0.1305 | -1.3060 | -0.5923 | 0.1788  | -0.1159 | -0.3769 | -0.4242 | -0.4212 | -0.5778 | -0.5456 |
| 1267 | S-665_Q96T  | Q96TA1 | Protein Niban 2 (NIBAN2 C9o    | -0.6487 | -0.6129 | -0.1698 | 0.2613  | -0.3493 | -0.2726 | -0.4068 | -0.9284 | -0.8181 | -0.6050 |
| 1268 | S-666_O002  | O00267 | Transcription elo SUPT5H SPT   | 0.1453  | 0.1465  | -0.3238 | -0.4729 | -0.1695 | -0.1126 | -0.1455 | -0.1259 | -0.0189 | 0.1185  |
| 1269 | S-669_Q96S  | Q96SB8 | Structural maint SMC6 SMC6     | -0.9055 | -0.6403 | -0.7524 | -0.7840 | -0.8129 | -0.7874 | -0.8888 | -0.9939 | -0.4985 | -0.5085 |
| 1270 | S-67_Q1504  | O15042 | U2 snRNP-associ U2SURP KIAA    | 0.0706  | 0.0318  | 0.0605  | 0.0247  | -0.3100 | 0.0683  | 0.0384  | -0.0278 | 0.1005  | 0.2596  |
| 1271 | S-67_Q4376  | O43768 | Alpha-endosulfin ENSA          | 1.6071  | 1.4370  | 0.9564  | 0.9576  | 0.7634  | 1.4806  | 1.1884  | 1.2646  | 1.3237  | 1.3155  |
| 1272 | S-67_P4959I | P49590 | Histidine--tRNA I HARS2 HARS   | -0.7730 | -0.8985 | -1.1269 | -1.2972 | -1.3423 | -1.2852 | -0.9909 | -1.2280 | -1.4146 | -1.0431 |
| 1273 | S-67_Q86VN  | Q86VM9 | Zinc finger CCCH ZC3H18 NHN    | -2.1135 | -2.1853 | -2.4820 | -1.9566 | -1.8613 | -2.4166 | -2.0212 | -2.2037 | -2.8469 | -2.4331 |
| 1274 | S-67_Q96FS  | Q96FS4 | Signal-induced p SIPA1 SPA1    | 1.4103  | 1.5327  | 1.1118  | 1.1835  | 0.6623  | 1.4225  | 1.0875  | 1.1039  | 1.0871  | 0.8453  |
| 1275 | S-67_Q9BXP  | Q9BXP5 | Serrate RNA effe SRRT ARS2 A   | -0.4066 | -0.2842 | -0.1406 | -0.1697 | -0.5423 | -0.0090 | -0.3544 | -0.1822 | 0.0000  | -0.0551 |
| 1276 | S-670_P250: | P25098 | Beta-adrenergic GRK2 ADRB1     | 2.1735  | 2.0482  | 2.0451  | 2.1622  | 2.0992  | 2.2023  | 2.1564  | 2.1875  | 2.0886  | 1.7266  |
| 1277 | S-670_Q96T  | Q96T37 | RNA-binding pro RBM15 OTT      | -0.2138 | -0.3334 | 0.0780  | -0.2764 | -0.1032 | 0.1745  | -0.0150 | 0.0369  | 0.0060  | -0.2212 |
| 1278 | S-670_Q9UF  | Q9UPN7 | Serine/threonine PPP6R1 KIAA   | -4.3183 | -4.1578 | -3.7419 | -3.7094 | -5.0902 | -3.9446 | -4.0516 | -3.7127 | -3.1843 | -3.5607 |
| 1279 | S-672_Q8N5  | Q8N5C8 | TGF-beta-activat TAB3 MAP3I NA | NA      | NA      | -2.8970 | -3.1717 | -3.2387 | -3.3219 | -2.9477 | -3.6928 | -3.9451 | -3.3362 |
| 1280 | S-672_Q9C0  | Q9C0C2 | 182 kDa tankyra: TNKS1BP1 K    | -0.1245 | -0.2937 | -0.3251 | -0.2062 | -0.2851 | 0.0964  | -0.1988 | -0.0529 | 0.1494  | -0.0090 |
| 1281 | S-672_Q9Y2  | Q9Y2W1 | Thyroid hormon THRAP3 BCL      | 0.1345  | 0.5033  | 0.6208  | 0.8929  | 0.9098  | 0.4748  | 0.6929  | 0.6681  | 0.6331  | 0.5888  |
| 1282 | S-674_P783: | P78347 | General transcrip GTF2I BAP1:  | -0.4579 | -0.7056 | 0.7163  | 0.5114  | 1.0355  | 0.2304  | 1.1148  | 0.7960  | 1.2965  | 1.6397  |
| 1283 | S-674_Q96T  | Q96T37 | RNA-binding pro RBM15 OTT      | -1.2182 | -1.3392 | -1.8247 | -1.5240 | -1.5210 | -1.2388 | -1.6872 | -1.7278 | -1.5077 | -1.5307 |
| 1284 | S-675_Q8IYE | Q8IYB3 | Serine/arginine r SRRM1 SRM    | 1.2614  | 1.2804  | 1.6208  | 2.2456  | 2.2282  | 1.8251  | 2.0878  | 2.0280  | 1.3893  | 1.7153  |
| 1285 | S-675_Q8TC  | Q8TC07 | TBC1 domain fan TBC1D15        | -0.0422 | -0.1714 | -0.2559 | -0.4688 | -0.4615 | -0.3425 | -0.5011 | -0.5857 | -0.2853 | -0.1576 |
| 1286 | S-677_P461I | P46100 | Transcriptional r ATRX RAD54   | 1.0436  | 1.1542  | 0.2001  | 0.3407  | 0.4590  | -0.0469 | 0.3752  | -0.0466 | 0.2567  | 0.3350  |
| 1287 | S-678_P356: | P35658 | Nuclear pore cor NUP214 CAI    | 0.2177  | 0.3803  | 0.7447  | 0.4463  | 0.3932  | 0.2680  | 0.3438  | 0.3450  | 0.3908  | 0.3563  |

|      |            |        |                    |              |   |         |         |         |         |         |         |         |         |         |         |
|------|------------|--------|--------------------|--------------|---|---------|---------|---------|---------|---------|---------|---------|---------|---------|---------|
| 1288 | S-678_Q4KM | Q4KMP7 | TBC1 domain fan    | TBC1D10B     | F | 0.6112  | 0.6058  | 0.5794  | 0.6852  | 0.4934  | 0.4068  | 0.7286  | 0.4650  | 0.3112  | 0.3175  |
| 1289 | S-678_Q9HC | Q9H0D6 | 5'-3' exoribonucl  | XRN2         |   | 0.1719  | 0.1572  | -0.0137 | -0.2123 | -0.1259 | -0.1487 | -0.1943 | -0.1996 | -0.1652 | -0.1605 |
| 1290 | S-680_Q9UK | Q9UKE5 | TRAF2 and NCK-i    | TNIK KIAA05  |   | 0.5334  | 0.3511  | 0.4489  | 0.3890  | 0.1968  | 0.4169  | 0.3621  | 0.2531  | 0.2535  | -0.0155 |
| 1291 | S-682_Q9Y2 | Q9Y2W1 | Thyroid hormonε    | THRAP3 BCL   |   | 1.0714  | 1.0388  | 1.5273  | 1.3965  | 1.3317  | 1.4456  | 1.1827  | 1.3402  | 1.5767  | 1.5334  |
| 1292 | S-683_P154 | P15498 | Proto-oncogene     | VAV1 VAV     |   | -0.3206 | -0.1309 | -0.6953 | -0.6777 | -0.6166 | -0.6858 | -0.6893 | -0.6756 | -0.9858 | -0.7085 |
| 1293 | S-684_Q150 | Q15052 | Rho guanine nuc    | ARHGEF6 CC   |   | -0.1245 | -0.1188 | -0.5611 | -0.4614 | -0.2150 | -0.5061 | -0.3023 | -0.5926 | -0.5096 | -0.4406 |
| 1294 | S-686_Q9BS | Q9BSJ8 | Extended synapt    | ESYT1 FAM6   |   | 0.0843  | 0.0912  | 0.4101  | 0.3065  | -0.0120 | 0.5273  | 0.3170  | 0.3534  | 0.3320  | 0.0716  |
| 1295 | S-687_P051 | P05164 | Myeloperoxidasε    | MPO          |   | -0.7007 | -0.7552 | -1.1292 | -1.0937 | -1.0288 | -1.1339 | -1.1634 | -1.4775 | -0.8886 | -0.7997 |
| 1296 | S-687_Q134 | Q13427 | Peptidyl-prolyl ci | PPIG         |   | 0.3598  | 0.4313  | 0.4381  | 0.7669  | 0.2270  | 0.1469  | 0.2077  | 0.1875  | 0.2270  | 0.4402  |
| 1297 | S-688_Q9UK | Q9UKE5 | TRAF2 and NCK-i    | TNIK KIAA05  |   | -1.9398 | -1.9553 | -1.2410 | -1.6863 | -1.3995 | -1.6692 | -1.7040 | -1.5789 | -1.6930 | -1.9859 |
| 1298 | S-69_Q7L2  | Q7L2J0 | 7SK snRNA meth     | MEPCE BCDI   |   | -0.3595 | -0.0565 | 0.6664  | 0.3008  | 0.4710  | 0.3693  | -0.0236 | 0.2466  | 0.3888  | 0.4450  |
| 1299 | S-69_Q9H6  | Q9H6F5 | Coiled-coil doma   | CCDC86 CYC   |   | -1.0742 | -0.9857 | -1.0885 | -1.0018 | -0.8064 | -0.8370 | -0.5535 | -0.9460 | -1.4146 | -0.9987 |
| 1300 | S-690_Q9NY | Q9NYF8 | Bcl-2-associated   | BCLAF1 BTF   |   | 0.2628  | 0.3024  | 0.4905  | 0.3010  | 0.6332  | 0.2914  | 0.5870  | 0.4268  | 0.7596  | 0.7212  |
| 1301 | S-691_Q129 | Q12996 | Cleavage stimula   | CSTF3        |   | -0.5422 | -0.7440 | -0.8931 | -0.3439 | -0.6480 | -0.5999 | -0.5459 | -0.6323 | -0.9628 | -0.7106 |
| 1302 | S-695_P515 | P51532 | Transcription act  | SMARCA4 B    |   | 0.6974  | 0.5638  | 0.8112  | 0.4657  | 0.5000  | 0.7166  | 0.5923  | 0.5257  | 0.4357  | 0.6252  |
| 1303 | S-695_Q047 | Q04759 | Protein kinase C   | PRKCQ PRKC   |   | -1.3456 | -1.3905 | -1.5215 | -1.1558 | -1.9844 | -0.7670 | -0.9402 | -1.0434 | -1.5338 | -1.5419 |
| 1304 | S-696_Q8IY | Q8IYB3 | Serine/arginine r  | SRRM1 SRM    |   | -0.6107 | -0.5307 | 0.0908  | 0.1335  | 0.2055  | -0.2108 | 0.3600  | 0.1837  | -0.0178 | 0.2232  |
| 1305 | S-696_Q929 | Q92974 | Rho guanine nuc    | ARHGEF2 KI   |   | 0.1378  | 0.0318  | -0.1246 | -0.1878 | -0.1750 | -0.1001 | -0.2784 | -0.2424 | -0.4338 | -0.1910 |
| 1306 | S-698_Q149 | Q14978 | Nucleolar and co   | NOLC1 KIAA   |   | 0.7387  | 0.5247  | 0.4188  | 0.3061  | 0.3261  | 0.5586  | 0.4332  | 0.3293  | 0.3892  | 0.3015  |
| 1307 | S-698_Q9Y2 | Q9Y2W1 | Thyroid hormonε    | THRAP3 BCL   |   | -1.2266 | -1.0762 | -1.4368 | -0.8562 | -1.2002 | -0.9106 | -1.0787 | -0.7482 | -1.2633 | -1.5419 |
| 1308 | S-699_Q155 | Q15596 | Nuclear receptor   | NCOA2 BHLI   |   | 1.0269  | 0.9721  | 0.6775  | 0.8804  | 0.6716  | 0.6433  | 0.6447  | 0.6182  | 0.7767  | 0.8431  |
| 1309 | S-7_O75995 | O75995 | SAM and SH3 do     | SASH3 CXorf  |   | -0.3161 | -0.2788 | 0.8023  | 0.8040  | 1.0604  | 0.1854  | 0.8553  | 0.4771  | 0.2783  | 0.0837  |
| 1310 | S-7_Q01105 | Q01105 | Protein SET (HLA   | SET          |   | 0.5057  | 0.7661  | -0.2660 | 0.0036  | -0.4240 | -0.2654 | -0.1884 | -0.2661 | -0.4285 | -0.4319 |
| 1311 | S-7_Q09161 | Q09161 | Nuclear cap-bind   | NCBP1 CBP8   |   | -3.0635 | -2.8296 | -2.3334 | -1.7938 | -1.7002 | -2.0201 | -1.9131 | -1.9593 | -2.5005 | -2.3448 |
| 1312 | S-70_Q9H4C | Q9H400 | Lck-interacting tr | LIME1 LIME   |   | -0.1952 | -0.1021 | -0.0468 | 0.0830  | -0.1564 | 0.2876  | 0.0808  | 0.1955  | -0.1122 | -0.1778 |
| 1313 | S-700_Q96T | Q96T37 | RNA-binding pro    | RBM15 OTT    |   | 0.2363  | 0.0901  | 0.1873  | 0.2627  | 0.2048  | 0.1171  | 0.1941  | 0.2415  | 0.0920  | 0.4269  |
| 1314 | S-701_Q134 | Q13428 | Treacle protein (  | TCOF1        |   | 0.0463  | 0.3336  | 0.3693  | 0.4696  | 0.3721  | 0.5860  | 0.2189  | 0.5520  | 0.8384  | 0.5751  |
| 1315 | S-701_Q9UC | Q9UQ88 | Cyclin-dependen    | CDK11A CDC   |   | -0.0329 | 0.1271  | -0.3785 | -0.2310 | 0.1090  | -0.2834 | -0.0801 | 0.0046  | -0.4163 | -0.4215 |
| 1316 | S-706_Q146 | Q14639 | Actin-binding LIN  | ABLIM1 ABL   |   | 0.4559  | 0.5850  | 0.2115  | 0.0271  | 0.1660  | 0.3547  | 0.3750  | 0.2651  | 0.7976  | 0.7791  |
| 1317 | S-707_Q9UK | Q9UKE5 | TRAF2 and NCK-i    | TNIK KIAA05  |   | 0.1686  | 0.1375  | 0.4495  | 0.4245  | -0.0111 | 0.2129  | 0.2907  | 0.1632  | 0.0671  | 0.1478  |
| 1318 | S-709_Q146 | Q14671 | Pumilio homolog    | PUM1 KIAAC   |   | 0.7488  | 0.6594  | 0.2155  | 0.2568  | 0.3890  | 0.1523  | 0.1896  | 0.1145  | 0.3133  | 0.3299  |
| 1319 | S-710_Q9UK | Q9UKV3 | Apoptotic chrom    | ACIN1 ACINI  |   | 0.2239  | 0.1320  | 0.8149  | 1.1845  | 1.2750  | 1.1029  | 1.1296  | 1.2597  | 0.6891  | 0.6692  |
| 1320 | S-713_Q8IY | Q8IYB3 | Serine/arginine r  | SRRM1 SRM    |   | -2.7334 | -2.0997 | -2.8063 | -2.8954 | -2.1792 | -2.5643 | -2.8048 | -2.7952 | -3.0065 | -2.2977 |
| 1321 | S-718_Q131 | Q13144 | Translation initia | EIF2B5 EIF2E |   | -2.0109 | -2.8478 | -1.6437 | -1.5550 | -1.7373 | -1.7222 | -1.6218 | -2.2753 | -2.5376 | -2.1822 |
| 1322 | S-718_Q8IX | Q8IXT5 | RNA-binding pro    | RBM12B       |   | -0.5715 | -0.1248 | -0.4991 | -0.3461 | -0.2717 | -0.5338 | -0.4792 | -0.5903 | -0.5022 | -0.1124 |
| 1323 | S-72_P0867 | P08670 | Vimentin           | VIM          |   | -2.1089 | -1.7110 | -1.9979 | -1.7094 | -1.6831 | -1.7620 | -1.5980 | -1.7027 | -2.4857 | -2.3492 |
| 1324 | S-720_Q151 | Q15149 | Plectin (PCN) (PL  | PLEC PLEC1   |   | 0.3255  | 0.3345  | 0.1771  | 0.3051  | 0.0301  | 0.1656  | 0.2981  | 0.2259  | 0.1944  | 0.3930  |
| 1325 | S-723_P981 | P98175 | RNA-binding pro    | RBM10 DXS    |   | 1.4526  | 1.6227  | 0.7869  | 1.3928  | 1.2302  | 0.7137  | 1.4127  | 0.9057  | 0.8981  | 1.0135  |
| 1326 | S-729_Q9UK | Q9UKV3 | Apoptotic chrom    | ACIN1 ACINI  |   | 2.0322  | 2.2913  | 1.6020  | 2.0120  | 1.7564  | 1.1543  | 1.9484  | 1.5267  | 1.4699  | 1.6405  |

|      |             |        |                   |             |         |         |         |         |         |         |         |         |         |         |
|------|-------------|--------|-------------------|-------------|---------|---------|---------|---------|---------|---------|---------|---------|---------|---------|
| 1327 | S-73_O1497  | O14976 | Cyclin-G-associat | GAK         | 0.2741  | 0.0984  | 0.1992  | 0.3152  | 0.3806  | 0.2876  | 0.8241  | 0.8697  | -0.1221 | -0.3410 |
| 1328 | S-73_Q6JBY  | Q6JBY9 | CapZ-interacting  | RCS1 CAPZ   | 0.3973  | 0.4987  | -0.0896 | 0.0524  | -0.0554 | 0.0697  | 0.0283  | -0.0834 | -0.3403 | -0.1562 |
| 1329 | S-73_Q9261  | Q92619 | Rho GTPase-activ  | ARHGAP45    | -1.6919 | -1.6197 | 0.1622  | -0.8244 | -0.2044 | -1.3145 | -0.1461 | -1.0403 | -0.5720 | -1.0064 |
| 1330 | S-731_Q9Y2  | Q9Y2K2 | Serine/threonine  | SIK3 KIAA09 | -0.0837 | 0.1098  | -0.0339 | 0.0947  | 0.1708  | -0.0546 | -0.1050 | -0.3185 | -0.2263 | -0.1166 |
| 1331 | S-733_Q32M  | Q32MZ4 | Leucine-rich rep  | LRRFIP1 GCF | -0.4090 | -0.1789 | -1.5366 | -1.5867 | -1.7069 | -1.7926 | -1.5980 | -1.6683 | -1.7184 | -1.7297 |
| 1332 | S-735_Q7Z3  | Q7Z3C6 | Autophagy-relate  | ATG9A APG5  | -3.3548 | -3.4896 | -3.4171 | -3.0636 | -2.9414 | -3.4461 | -2.9781 | -3.7329 | -3.5452 | -3.7212 |
| 1333 | S-736_Q129  | Q12965 | Unconventional    | MYO1E MYC   | -3.5742 | -3.8085 | -0.0031 | 0.0947  | -0.1060 | 0.4368  | 0.2960  | 0.1861  | -1.9105 | -1.6918 |
| 1334 | S-736_Q155  | Q15596 | Nuclear receptor  | NCOA2 BHLH  | 0.7402  | 0.7829  | 0.2573  | 0.5974  | 0.5524  | 0.4368  | 0.3591  | 0.2898  | 0.4338  | 0.3030  |
| 1335 | S-736_Q8TF  | Q8TF01 | Arginine/serine-r | PNISR C6orf | -1.5370 | -1.3703 | -1.2361 | -1.3461 | -1.0554 | -1.1177 | -0.9730 | -0.9698 | -1.2355 | -1.1082 |
| 1336 | S-736_Q96T  | Q96T58 | Msx2-interacting  | SPEN KIAA09 | -1.8921 | -1.8923 | -1.9730 | -2.1797 | -1.9203 | -1.8720 | -2.2597 | -2.2032 | -1.8343 | -1.6548 |
| 1337 | S-737_Q9P2  | Q9P2G1 | Ankyrin repeat a  | ANKIB1 KIAA | -1.1325 | -1.0010 | -0.7317 | -1.0932 | -1.1199 | -0.9114 | -0.9308 | -1.1110 | -1.2530 | -1.2021 |
| 1338 | S-739_Q9UE  | Q9UER7 | Death domain-as   | DAXX BING2  | -0.3183 | -0.6841 | -0.1781 | 0.0403  | -0.2739 | -0.0469 | -0.2033 | -0.1079 | -0.0422 | 0.0154  |
| 1339 | S-74_Q96C1  | Q96C19 | EF-hand domain-   | EFHD2 SWS1  | 0.6635  | 0.8323  | -0.0631 | 0.2627  | -0.4240 | -0.4522 | -0.4505 | -0.2588 | -1.1038 | -1.1969 |
| 1340 | S-74_Q96FS  | Q96FS4 | Signal-induced p  | SIPA1 SPA1  | -2.1288 | -2.0177 | -1.9788 | -1.9768 | -1.8664 | -1.8840 | -1.5737 | -1.6995 | -2.0357 | -2.0322 |
| 1341 | S-74_Q9BXP  | Q9BXP5 | Serrate RNA effe  | SRRT ARS2 A | 0.2193  | 0.1954  | -0.5565 | -0.1878 | -0.4717 | -0.7519 | -0.1913 | -0.4669 | -0.6951 | -0.6031 |
| 1342 | S-74_Q9NP5  | Q9NP56 | cAMP-specific 3'  | PDE7B       | -1.1325 | -1.0622 | -1.5245 | -1.7447 | -1.3423 | -1.3983 | -1.6460 | -1.5562 | -1.7931 | -1.3959 |
| 1343 | S-740_Q8IYE | Q8IYB3 | Serine/arginine r | SRRM1 SRM   | -0.4114 | -0.5179 | 0.4972  | 0.0661  | 0.2395  | -0.2870 | 0.4302  | 0.0091  | 0.5180  | 0.5401  |
| 1344 | S-742_Q9P2  | Q9P275 | Ubiquitin carbox  | USP36 KIAA0 | -0.4728 | -0.3504 | -0.2201 | 0.0980  | 0.2223  | 0.0454  | 0.0039  | 0.0302  | -0.1594 | -0.1533 |
| 1345 | S-743_Q08J  | Q08J23 | RNA cytosine C5   | NSUN2 SAKI  | -1.1932 | -1.1068 | -1.3489 | -1.0786 | -1.2258 | -1.2494 | -2.3039 | -2.1412 | -2.5605 | -2.1362 |
| 1346 | S-75_Q96S5  | Q96S55 | ATPase WRNIP1     | WRNIP1 WH   | 0.1279  | -0.1128 | 0.5105  | 0.4371  | 0.5810  | 0.5760  | 0.6035  | 0.5065  | 0.5609  | 0.2237  |
| 1347 | S-752_Q9UM  | Q9UMZ2 | Synergilin gamma  | SYNRG AP1C  | 0.9918  | 1.1108  | 1.1262  | 1.0762  | 1.0228  | 0.8758  | 1.0672  | 1.0996  | 0.6331  | 0.6573  |
| 1348 | S-754_Q8IYE | Q8IYB3 | Serine/arginine r | SRRM1 SRM   | 0.3356  | 0.4565  | 0.6958  | 0.9685  | 0.9398  | 0.7102  | 0.9013  | 0.7924  | 0.6498  | 1.0173  |
| 1349 | S-759_Q66K  | Q66K74 | Microtubule-ass   | MAP1S BPY2  | -0.0857 | -0.3183 | 0.2396  | -0.3193 | -0.0269 | 0.1656  | -0.0289 | -0.0915 | -0.2293 | -0.1334 |
| 1350 | S-76_Q1482  | Q14828 | Secretory carrier | SCAMP3 C1c  | 0.1719  | 0.3319  | 0.3373  | 0.6707  | 0.9702  | 0.8179  | 0.5352  | 0.5299  | 0.0834  | 0.4487  |
| 1351 | S-76_Q0143  | Q01433 | AMP deaminase     | AMPD2       | -1.4691 | -1.5356 | 0.7142  | -0.4931 | 0.4188  | -1.2389 | 0.1068  | -1.0023 | -0.8424 | -1.3122 |
| 1352 | S-76_Q96E0  | Q96E09 | Protein FAM122/   | FAM122A C9  | -1.0628 | -1.1260 | -1.1639 | -1.0674 | -1.1875 | -0.8995 | -0.8626 | -1.2716 | -0.7752 | -0.8429 |
| 1353 | S-76_Q9UJ7  | Q9UJ70 | N-acetyl-D-gluco  | NAGK        | -0.5124 | -0.6487 | -0.6631 | -0.6870 | -0.7124 | -0.5316 | -0.8418 | -0.8386 | -0.5698 | -0.6403 |
| 1354 | S-763_Q8N4  | Q8N4C8 | Misshapen-like k  | MINK1 B55 I | -0.4308 | -0.4066 | -0.0126 | -0.0251 | -0.2475 | -0.2708 | -0.2063 | -0.4069 | -0.9704 | -0.5288 |
| 1355 | S-766_P432  | P43243 | Matrin-3          | MATR3 KIAA  | 0.3255  | 0.9476  | 0.5134  | 0.8629  | 0.2519  | 0.9268  | 0.0918  | 0.8580  | 0.3758  | 0.3802  |
| 1356 | S-769_Q8IYE | Q8IYB3 | Serine/arginine r | SRRM1 SRM   | 0.3724  | 0.2717  | 0.2927  | 0.2478  | 0.4737  | 0.6076  | 0.2661  | 0.3426  | 0.4395  | 0.6679  |
| 1357 | S-77_Q6092  | Q60927 | E3 ubiquitin-prot | PPP1R11 HC  | -2.2309 | -1.9467 | -1.7004 | -2.0125 | -1.9699 | -2.1145 | -2.2350 | -2.2388 | -1.3871 | -1.4061 |
| 1358 | S-77_Q1506  | Q15061 | WD repeat-cont    | WDR43 KIAA  | -1.1524 | -0.4819 | -0.7471 | -0.0197 | -0.2002 | -0.2110 | -0.3379 | -0.5033 | -0.7487 | -0.3008 |
| 1359 | S-77_Q5T20  | Q5T200 | Zinc finger CCCH  | ZC3H13 KIAA | 0.8941  | 1.0776  | -0.6275 | -0.4565 | -0.4640 | -0.8802 | -0.3363 | -0.6830 | -0.9252 | -0.3690 |
| 1360 | S-77_Q7Z5K  | Q7Z5K2 | Wings apart-like  | WAPL FOE K  | 1.2927  | 1.3025  | 0.6558  | 0.8929  | 0.8861  | 0.4368  | 0.9410  | 0.6825  | 0.5143  | 0.7920  |
| 1361 | S-771_Q134  | Q13428 | Treacle protein ( | TCOF1       | -0.0219 | 0.0328  | -0.1604 | -0.1361 | -0.2717 | -0.2834 | -0.3445 | -0.1892 | 0.1029  | 0.0605  |
| 1362 | S-772_Q7Z6  | Q7Z6E9 | E3 ubiquitin-prot | RBBP6 P2PR  | -4.3548 | -3.1777 | -2.9206 | -3.3782 | -3.3850 | -3.7320 | -2.7168 | -3.6159 | -3.5759 | -3.6070 |
| 1363 | S-777_Q134  | Q13428 | Treacle protein ( | TCOF1       | -0.7394 | -0.3661 | -0.4496 | -0.3170 | -0.5343 | -0.3406 | -0.5066 | -0.4110 | -0.0871 | -0.1433 |
| 1364 | S-779_Q9H2  | Q9H2G2 | STE20-like serine | SLK KIAA020 | -0.3510 | -0.3262 | -0.5396 | -0.2075 | -0.4711 | 0.0637  | -0.1392 | -0.2395 | -0.4555 | -0.6134 |
| 1365 | S-78_P1386  | P13861 | cAMP-dependen     | PRKAR2A PK  | -1.8988 | -1.7969 | -1.0490 | -1.4204 | -1.4289 | -1.4624 | -1.7557 | -1.2977 | -1.1579 | -1.0917 |

|      |            |        |                     |         |         |         |         |         |         |         |         |         |         |         |         |         |
|------|------------|--------|---------------------|---------|---------|---------|---------|---------|---------|---------|---------|---------|---------|---------|---------|---------|
| 1366 | S-782_Q8TD | Q8TDD1 | ATP-dependent f     | DDX54   | -0.3251 | -0.3406 | 0.3055  | 0.2964  | 0.1741  | 0.2431  | 0.3232  | 0.2772  | 0.0000  | 0.1800  |         |         |
| 1367 | S-782_Q929 | Q92974 | Rho guanine nuc     | ARHGEF2 | KI      | -2.9820 | -2.0033 | -0.9937 | -1.1797 | -1.1300 | -0.8055 | -1.5746 | -0.9519 | -1.2633 | -1.4441 |         |
| 1368 | S-787_Q927 | Q92794 | Histone acetyltra   | KAT6A   | MOZ     | -0.0422 | -0.1467 | -0.6339 | -0.5761 | -0.6308 | -0.6272 | -0.4103 | -0.6659 | -0.7597 | -0.5934 |         |
| 1369 | S-79_P2636 | P26368 | Splicing factor U   | U2AF2   | U2AF    | 1.4402  | 1.7053  | 0.9331  | 1.0362  | 1.1463  | 0.7046  | 1.1698  | 0.8906  | 0.8985  | 0.8945  |         |
| 1370 | S-79_Q1677 | Q16778 | Histone H2B typ     | H2BC21  | H2B     | -1.0403 | -1.2923 | -0.3922 | -0.0842 | -0.0028 | -0.9446 | -0.3103 | -0.6182 | -0.6536 | -0.6508 |         |
| 1371 | S-792_P422 | P42229 | Signal transduce    | STAT5A  | STA     | -1.4259 | -2.0302 | -1.5035 | -1.1919 | -1.2044 | -1.0701 | -1.2442 | -1.0340 | -1.0598 | -0.9910 |         |
| 1372 | S-795_O753 | O75362 | Zinc finger prote   | ZNF217  | ZAB     | 0.0671  | 0.3016  | 0.6140  | 0.8492  | 0.5711  | 0.4844  | 0.4541  | 0.6468  | 0.6810  | 0.6143  |         |
| 1373 | S-795_Q140 | Q14005 | Pro-interleukin-1   | IL16    |         | 0.3966  | 0.1567  | 0.7922  | -0.1724 | 0.5866  | -0.4309 | 0.7590  | 0.2935  | 0.0418  | -0.0242 |         |
| 1374 | S-795_Q5T8 | Q5T8P6 | RNA-binding pro     | RBM26   | C13c    | -0.1808 | -0.1665 | 0.2833  | 0.3795  | 0.1855  | 0.1143  | 0.3149  | 0.3377  | 0.4811  | 0.5097  |         |
| 1375 | S-797_Q8IY | Q8IYB3 | Serine/arginine r   | SRRM1   | SRM     | 0.2286  | 0.2392  | 0.1557  | 0.2804  | -0.1300 | 0.0338  | 0.0000  | 0.1576  | -0.1321 | -0.2664 |         |
| 1376 | S-799_O949 | O94979 | Protein transpor    | SEC31A  | KIAA    | 0.6278  | 0.6057  | 0.9112  | 0.8332  | 0.6631  | 0.9389  | 0.5960  | 0.6817  | 0.7786  | 0.5373  |         |
| 1377 | S-80_P5160 | P51608 | Methyl-CpG-binc     | MECP2   |         | 1.8867  | 1.9127  | 0.7239  | 0.8122  | 0.5822  | 0.9158  | 1.1718  | 0.8781  | -0.3635 | 0.0752  |         |
| 1378 | S-80_Q1564 | Q15649 | Zinc finger HIT d   | ZNHIT3  | TRIP    | -0.2674 | -0.4574 | -0.4439 | -0.4936 | -0.3778 | -0.2231 | -0.4594 | -0.4522 | -0.2187 | -0.1306 |         |
| 1379 | S-80_Q6IQ1 | Q6IQ19 | Centriole, cilia ar | CCSAP   | C1orf   | -0.8921 | -1.3790 | -1.0796 | -1.2331 | -1.6422 | -1.1242 | -1.3071 | -1.0980 | -1.1696 | -1.1648 |         |
| 1380 | S-804_Q7L0 | Q7L014 | Probable ATP-de     | DDX46   | KIAA    | -2.1325 | -2.4051 | -2.4742 | -2.5240 | -2.4742 | -2.4220 | -2.4738 | -2.7741 | -2.5003 | -2.0645 |         |
| 1381 | S-805_Q9BT | Q9BT00 | Death-inducer of    | DIDO1   | C20o    | -0.1167 | 0.0231  | -0.2262 | -0.1400 | -0.3826 | -0.3257 | -0.3983 | -0.4376 | -0.2649 | -0.0753 |         |
| 1382 | S-808_Q154 | Q15424 | Scaffold attachm    | SAFB    | HAP     | HI      | -1.2394 | -1.5147 | -0.8340 | -0.8757 | -0.1139 | -0.6457 | -0.2319 | -0.6490 | -0.5528 | -0.3976 |
| 1383 | S-81_Q5VW  | Q5VWQ0 | Lysine-specific d   | RSBN1   |         | 0.6463  | 0.6073  | -0.2068 | 0.1866  | 0.1577  | -0.0499 | 0.1397  | 0.2556  | -0.0858 | -0.1362 |         |
| 1384 | S-810_Q8TE | Q8TEQ0 | Sorting nexin-29    | SNX29   | RUN1    | 0.5801  | 0.7279  | 0.7353  | 0.9667  | 0.6945  | 0.8188  | 0.6145  | 0.9101  | 0.5915  | 0.5267  |         |
| 1385 | S-819_P461 | P46100 | Transcriptional r   | ATRX    | RAD54   | 0.8755  | 0.9487  | 0.9104  | 1.1038  | 0.9759  | 0.9955  | 0.9130  | 0.9862  | 1.0705  | 0.9301  |         |
| 1386 | S-82_Q53GS | Q53GS9 | U4/U6.U5 tri-snR    | USP39   | CGI-2   | -0.6592 | -0.8720 | -1.0111 | -0.4295 | -0.7613 | -0.9381 | -0.4828 | -0.7443 | -1.2686 | -0.9683 |         |
| 1387 | S-82_Q9GZR | Q9GZR7 | ATP-dependent f     | DDX24   |         | 0.8466  | -0.1164 | 0.0544  | 1.3123  | 0.8650  | 0.6366  | 0.6000  | 0.6872  | -0.2571 | -0.1837 |         |
| 1388 | S-823_Q460 | Q460N5 | Protein mono-AC     | PARP14  | BAL     | -0.1108 | 0.7739  | -0.5766 | -0.0599 | -0.3730 | -0.1871 | -0.3628 | -0.5607 | -0.3702 | 0.0406  |         |
| 1389 | S-825_P552 | P55265 | Double-stranded     | ADAR    | ADAR    | 0.0000  | -0.3197 | -0.8604 | -0.2972 | -0.0028 | -0.6158 | 0.3170  | -0.3300 | -1.0734 | -1.4371 |         |
| 1390 | S-829_O155 | O15550 | Lysine-specific d   | KDM6A   | UTX     | 0.6440  | 0.6566  | 0.2599  | 0.5101  | 0.9580  | 0.9095  | 0.4128  | 0.2671  | 0.4849  | 0.5507  |         |
| 1391 | S-829_Q9HC | Q9HCG8 | Pre-mRNA-splicir    | CWC22   | KIAA    | 0.3241  | -0.1966 | 0.5596  | 1.3931  | 1.4306  | 1.0236  | 0.9096  | 1.0444  | 0.4357  | 0.5033  |         |
| 1392 | S-83_P1064 | P10644 | cAMP-dependen       | PRKAR1A | PK      | -0.2245 | -0.0867 | -0.3133 | -0.4204 | -0.1959 | -0.3145 | -0.0981 | -0.2827 | -0.1165 | -0.2373 |         |
| 1393 | S-83_Q1497 | Q14978 | Nucleolar and co    | NOLC1   | KIAA    | 0.1719  | 0.0121  | 0.2747  | 0.2950  | 0.1676  | 0.2937  | 0.0894  | 0.3341  | 0.3206  | 0.5647  |         |
| 1394 | S-83_Q8IV6 | Q8IV63 | Inactive serine/tl  | VRK3    |         | -0.6013 | -0.5911 | -0.2939 | -0.2712 | -0.6480 | -0.4320 | -0.2396 | -0.4564 | -0.1977 | -0.2267 |         |
| 1395 | S-8305_Q8N | Q8NF91 | Nesprin-1 (Enapt    | SYNE1   | C6orf   | 0.0108  | -0.1116 | 0.1030  | -0.1439 | -0.2695 | -0.0685 | -0.2319 | -0.3128 | -0.4839 | -0.7841 |         |
| 1396 | S-831_Q86Y | Q86YV0 | RAS protein activ   | RASAL3  |         | -2.1404 | -1.9945 | -2.0403 | -2.2123 | -1.8324 | -2.2424 | -2.0039 | -2.1412 | -1.9806 | -1.5837 |         |
| 1397 | S-832_Q96S | Q96ST3 | Paired amphipat     | SIN3A   |         | -0.0329 | -0.2017 | -0.3211 | -0.4204 | -0.0515 | -0.0937 | -0.2427 | 0.0496  | -0.0789 | -0.0739 |         |
| 1398 | S-834_Q128 | Q12872 | Splicing factor, s  | SFSWAP  | SFR     | -4.6402 | -3.6752 | -4.0708 | -5.1400 | -3.3470 | -3.5468 | -3.3628 | -3.1547 | -3.5301 | -3.5914 |         |
| 1399 | S-834_Q995 | Q99590 | Protein SCAF11 (    | SCAF11  | CASI    | -0.0534 | -0.2483 | 1.0031  | 1.2183  | 1.3462  | 1.0483  | 0.8116  | 1.1508  | 0.9211  | 1.0255  |         |
| 1400 | S-838_Q9UK | Q9UKV3 | Apoptotic chrom     | ACIN1   | ACIN1   | -0.1424 | -0.1009 | 0.3661  | 0.0980  | 0.1141  | -0.0826 | 0.1884  | 0.0599  | 0.0661  | -0.1633 |         |
| 1401 | S-84_O4356 | O43561 | Linker for activat  | LAT     |         | 1.3125  | 1.1477  | -0.0719 | 1.2598  | 1.2167  | 0.6864  | 1.4536  | 0.9455  | 0.0686  | -0.0471 |         |
| 1402 | S-844_Q6P2 | Q6P2E9 | Enhancer of mRN     | EDC4    | HEDLS   | -0.5930 | -0.5926 | -0.7657 | -0.7620 | -0.7367 | -0.6224 | -1.0361 | -0.9068 | -0.9339 | -0.9547 |         |
| 1403 | S-844_Q8W  | Q8WY36 | HMG box transcr     | BBX     | HBP2    | 0.9287  | 0.7771  | 1.3097  | 1.0988  | 1.4941  | 1.6394  | 1.1896  | 1.1117  | 1.5211  | 1.3212  |         |
| 1404 | S-846_Q9P1 | Q9P1Y6 | PHD and RING fir    | PHRF1   | KIAA    | 0.9855  | 1.0554  | -0.2262 | 0.2053  | 0.1806  | -0.6067 | 0.4541  | -0.0372 | -0.4948 | -0.0564 |         |

|      |                    |                                |         |         |         |         |         |         |         |         |         |         |
|------|--------------------|--------------------------------|---------|---------|---------|---------|---------|---------|---------|---------|---------|---------|
| 1405 | S-85_P1117: P11171 | Protein 4.1 (P4.1 EPB41 E41P   | -0.4653 | -0.4007 | 0.8219  | 0.9242  | 0.7471  | 0.8196  | 1.3837  | 1.1821  | 0.8120  | 0.7703  |
| 1406 | S-85_Q1518 Q15185  | Prostaglandin E s PTGES3 P23   | -0.2394 | -0.3364 | 0.0156  | -0.0342 | -0.1523 | 0.0236  | 0.1196  | 0.0846  | -0.0476 | -0.2237 |
| 1407 | S-85_Q9UHI Q9UHD8  | Septin-9 (MLL sep SEPTIN9 KIA  | 1.5384  | 1.8851  | 1.9418  | 1.4900  | 1.4100  | 1.6988  | 1.6439  | 1.6886  | 1.2176  | 1.0154  |
| 1408 | S-852_Q86V Q86VM9  | Zinc finger CCCH ZC3H18 NHM    | -1.7515 | -1.5695 | -0.8738 | -0.6720 | -0.6772 | -1.4998 | -0.5140 | -1.1581 | -0.8529 | -0.6031 |
| 1409 | S-857_Q86Y Q86YV0  | RAS protein activ RASAL3       | -0.1625 | -0.3547 | 0.1827  | -0.2041 | -0.2193 | -0.3827 | 0.1804  | -0.0123 | -0.6312 | -0.2977 |
| 1410 | S-857_Q928 Q92854  | Semaphorin-4D (SEMA4D C9c      | 1.6800  | 1.9077  | 1.7799  | 1.6918  | 1.5748  | 1.8368  | 1.5932  | 1.5829  | 1.8264  | 1.5871  |
| 1411 | S-86_P0511: P05114 | Non-histone chrc HMGN1 HM      | 0.6647  | 0.7622  | 0.2263  | 0.7690  | 0.7580  | 0.4456  | 0.5108  | 0.6863  | 0.4558  | 0.7726  |
| 1412 | S-86_Q3KQL Q3KQU3  | MAP7 domain-cc MAP7D1 KIA      | -0.5904 | -0.4819 | -0.3343 | -0.5164 | -0.2851 | -0.0623 | -0.3184 | -0.1161 | 0.0723  | 0.1902  |
| 1413 | S-860_Q96S Q96ST3  | Paired amphipat SIN3A          | -0.0278 | 0.1733  | 0.1889  | 0.4916  | 0.1724  | 0.3212  | 0.1231  | 0.1512  | 0.1462  | 0.0668  |
| 1414 | S-861_Q9UQ Q9UMN6  | Histone-lysine N- KMT2B HRX:   | -0.0723 | -0.0762 | -0.0168 | -0.1205 | -0.3635 | -0.0905 | 0.0447  | -0.0785 | -0.1873 | -0.3056 |
| 1415 | S-863_Q2KH Q2KHT3  | Protein CLEC16A CLEC16A KIA    | -3.1645 | -2.9298 | -2.2189 | -2.1090 | -2.2562 | -2.1603 | -2.0842 | -1.9578 | -2.2447 | -2.0538 |
| 1416 | S-864_P293: P29374 | AT-rich interactiv ARID4A RBB  | 0.9143  | 0.9238  | 0.9847  | 1.0000  | 0.8650  | 0.8196  | 0.9151  | 1.1046  | 0.9300  | 0.6343  |
| 1417 | S-865_Q86Y Q86YV0  | RAS protein activ RASAL3       | 0.3442  | 0.4139  | -0.3731 | -0.2041 | -0.2562 | -0.0858 | 0.3642  | 0.0362  | -0.3109 | -0.2237 |
| 1418 | S-867_Q9P1 Q9P1Y6  | PHD and RING fir PHRF1 KIAA:   | 1.6201  | 1.5982  | 1.1528  | 1.3829  | 1.0092  | 1.0126  | 1.1421  | 1.1159  | 0.9321  | 0.9721  |
| 1419 | S-868_P783: P78332 | RNA-binding pro RBM6 DEF3      | -0.1108 | -0.1492 | -0.2324 | -0.0544 | -0.1938 | -0.2834 | -0.1988 | -0.1446 | -0.1363 | -0.0039 |
| 1420 | S-868_Q86V Q86VM9  | Zinc finger CCCH ZC3H18 NHM    | 1.9615  | 1.9467  | 2.1356  | 2.4683  | 2.2546  | 2.0360  | 2.1950  | 2.1404  | 1.9744  | 1.9142  |
| 1421 | S-869_Q9Y2 Q9Y2K7  | Lysine-specific de KDM2A CXXI  | -0.2660 | -0.1920 | -0.3749 | -0.2992 | -0.5185 | -0.2462 | -0.3469 | -0.4038 | -0.4898 | -0.5098 |
| 1422 | S-87_P4123: P41236 | Protein phospho PPP1R2 IPP2    | -2.3923 | -2.6334 | -3.0190 | -5.0786 | -3.4845 | -2.9676 | -2.6914 | -2.6538 | -2.9755 | -2.4371 |
| 1423 | S-87_Q1388 Q13884  | Beta-1-syntrophin SNTB1 SNT2   | -0.2182 | -0.2562 | -0.1769 | -0.5761 | -0.6194 | -0.3866 | -0.2784 | -0.3319 | -0.2949 | -0.6208 |
| 1424 | S-87_Q8WM Q8WW12   | PEST proteolytic PCNP          | -2.3923 | -1.8841 | -0.2435 | -0.6083 | -0.0688 | -1.3788 | 0.7041  | -0.9939 | -1.3013 | -1.3427 |
| 1425 | S-87_Q9UK7 Q9UK76  | Jupiter microtub JPT1 ARM2 I   | 1.1958  | 1.3354  | 0.7003  | 0.7039  | 0.5270  | 0.4865  | 0.6913  | 0.5193  | 0.3393  | 0.2510  |
| 1426 | S-871_Q149 Q14974  | Protein phospho PPP1R12A M     | -0.0182 | 0.3034  | 0.2970  | 0.1325  | -0.0083 | 0.0810  | 0.0078  | 0.0287  | 0.0078  | 0.0703  |
| 1427 | S-873_Q7Z6 Q7Z6E9  | E3 ubiquitin-prot RBBP6 P2PR   | -0.4235 | -0.3675 | -0.9206 | -0.8056 | -0.8961 | -0.9275 | -0.8745 | -0.8996 | -0.8296 | -0.6149 |
| 1428 | S-874_Q8IYE Q8IYB3 | Serine/arginine r SRRM1 SRM    | 1.1747  | 1.0125  | 0.7694  | 0.8777  | 0.7996  | 0.5857  | 0.9644  | 0.6148  | 0.6240  | 0.7971  |
| 1429 | S-879_Q5T2 Q5T200  | Zinc finger CCCH ZC3H13 KIAA   | -1.6346 | -1.6299 | -0.1876 | -0.5164 | -0.4068 | -0.2476 | -0.4294 | -0.5033 | -0.0409 | 0.1174  |
| 1430 | S-88_P0675: P06753 | Tropomyosin alp TPM3           | 0.2979  | 0.1602  | 0.2799  | 0.3931  | 0.1394  | 0.1074  | 0.3842  | 0.2141  | 0.2080  | 0.3462  |
| 1431 | S-88_P3331: P33316 | Deoxyuridine 5'-I DUT          | 0.9864  | 0.8348  | 0.9165  | 0.7679  | 0.8548  | 1.0037  | 1.0548  | 1.2022  | 1.5971  | 1.3401  |
| 1432 | S-88_Q1315 Q13151  | Heterogeneous r HNRNPA0 H      | -1.9608 | -1.6858 | -2.2092 | -1.3282 | -1.3850 | -1.7469 | -0.9935 | -1.2716 | -1.8296 | -1.8732 |
| 1433 | S-88_Q86UL Q86UU0  | B-cell CLL/lymph BCL9L DLNB    | 0.9531  | 0.9337  | 1.0130  | 0.9938  | 1.0292  | 1.1362  | 0.9417  | 1.1110  | 1.2922  | 1.0734  |
| 1434 | S-88_Q9NX: Q9NXG2  | THUMP domain- THUMPD1          | -0.0666 | -0.0359 | -0.1912 | -0.1459 | -0.3377 | -0.3108 | -0.1120 | 0.1397  | -0.0236 | -0.3297 |
| 1435 | S-882_Q751 Q75151  | Lysine-specific de PHF2 CENP-: | -0.6687 | -0.5451 | -1.1292 | -1.2082 | -0.9954 | -1.4542 | -0.7823 | -1.2496 | -1.4426 | -1.3657 |
| 1436 | S-882_Q96T Q96T23  | Remodeling and RSF1 HBXAP      | -1.0403 | -1.0370 | -0.6768 | -0.6806 | -1.1421 | -0.9134 | -1.1461 | -0.9054 | -0.6867 | -0.6589 |
| 1437 | S-886_Q929 Q92974  | Rho guanine nuc ARHGEF2 KI     | -2.0329 | -1.3963 | -1.7279 | -2.2206 | -1.6480 | -1.6504 | -1.6178 | -1.5473 | -1.6721 | -1.5307 |
| 1438 | S-886_Q9BX Q9BXL7  | Caspase recruitr CARD11 CAF    | -0.5795 | -0.5116 | -0.7881 | -0.5814 | -1.0288 | -0.5381 | -0.4276 | -0.8085 | -0.7707 | -0.4284 |
| 1439 | S-888_P529: P52948 | Nuclear pore cor NUP98 ADAI    | 0.1639  | 0.1492  | 0.7950  | 0.4305  | 0.5711  | 0.5539  | 0.4283  | 0.6967  | 0.7820  | 0.5259  |
| 1440 | S-889_Q32P Q32P44  | Echinoderm micr EML3           | -0.7761 | -0.6858 | -0.9792 | -1.1479 | -0.9133 | -1.0639 | -1.0355 | -0.9578 | -0.8135 | -0.9187 |
| 1441 | S-89_P0511: P05114 | Non-histone chrc HMGN1 HM      | 0.5765  | 0.4773  | 0.5702  | 0.6414  | 0.7405  | 0.7803  | 0.8227  | 0.7729  | 0.9273  | 1.0734  |
| 1442 | S-89_Q9NR: Q9NR30  | Nucleolar RNA hi DDX21         | 1.4505  | 1.4753  | 1.3575  | 1.4754  | 1.5480  | 1.2937  | 1.5618  | 1.3836  | 1.0200  | 1.0580  |
| 1443 | S-890_Q9UH Q9UHV7  | Mediator of RNA MED13 ARC:     | 0.2515  | 0.6510  | -0.1223 | -0.0215 | -0.2540 | -0.1421 | -0.1432 | -0.1787 | -0.1235 | 0.0192  |



|      |             |         |                                       |         |         |         |         |         |         |         |         |         |         |
|------|-------------|---------|---------------------------------------|---------|---------|---------|---------|---------|---------|---------|---------|---------|---------|
| 1444 | S-891_Q150  | O15027  | Protein transport SEC16A KIAA         | 0.3299  | 0.3310  | 0.7670  | 0.6951  | -0.2964 | -0.1520 | 0.4906  | 0.4359  | 0.6939  | 0.8438  |
| 1445 | S-891_P783  | P78332  | RNA-binding protein RBM6 DEF3         | 0.0233  | -0.3253 | 1.3612  | 1.6940  | 1.4690  | 1.5519  | 1.6633  | 1.6132  | 1.4709  | 1.4983  |
| 1446 | S-893_Q86V  | Q86VM9  | Zinc finger CCCH ZC3H18 NHR           | 0.1815  | -0.0097 | 0.5787  | 0.9306  | 0.8225  | 0.4185  | 0.4817  | 0.4977  | 0.4033  | 0.4452  |
| 1447 | S-9_Q9NYM   | Q9NYM9  | BET1-like protein BET1L GS15          | 0.2424  | -0.0416 | 0.3998  | 0.2523  | 0.2223  | 0.5325  | 0.1350  | 0.1563  | 0.3718  | 0.1857  |
| 1448 | S-90_Q6PKG  | Q6PKG0  | La-related protein LARP1 KIAA         | -1.5475 | -1.5827 | -1.2559 | -1.3689 | -1.1421 | -1.3905 | -1.6706 | -1.6395 | -1.1094 | -0.9783 |
| 1449 | S-901_Q8IYE | Q8IYB3  | Serine/arginine rich SRRM1 SRM        | 1.2651  | 1.0377  | 1.2923  | 2.3062  | 2.0931  | 1.6193  | 1.5745  | 1.9451  | 0.8864  | 1.3558  |
| 1450 | S-906_P981  | P98171  | Rho GTPase-activating ARHGAP4 KI      | 0.2409  | 0.2504  | 0.0555  | 0.0386  | 0.1073  | 0.3273  | 0.0397  | -0.0278 | -0.0530 | -0.0168 |
| 1451 | S-906_Q134  | Q13428  | Treacle protein (TCOF1                | -0.2652 | -0.0427 | -0.0588 | 0.1145  | -0.1626 | -0.0717 | 0.1015  | 0.2785  | -0.4008 | -0.5972 |
| 1452 | S-907_P198  | P19838  | Nuclear factor of NFkB1               | -0.5291 | -0.6984 | -0.4829 | -0.4275 | -0.3730 | -0.1553 | -0.4594 | -0.4130 | -0.3190 | -0.3104 |
| 1453 | S-907_Q9P1  | Q9P107  | GEM-interacting GMIP                  | -0.1788 | -0.1248 | -0.0533 | -0.2863 | -0.3470 | -0.2601 | -0.0719 | -0.1079 | -0.0302 | -0.0498 |
| 1454 | S-91_P1281  | P12814  | Alpha-actinin-1 (ACTN1                | -0.7214 | -0.6966 | -1.5245 | -1.2373 | -1.2344 | -0.5446 | -0.9204 | -0.5834 | -0.7707 | -1.1193 |
| 1455 | S-91_Q9H6F  | Q9H6F5  | Coiled-coil domain CCDC86 CYC         | 0.5272  | 0.5809  | -0.8008 | -0.6083 | -0.7342 | -0.8584 | -0.5122 | -1.0721 | -1.0276 | -0.8268 |
| 1456 | S-910_B5ME  | B5ME19  | Eukaryotic translation EIF3CL         | -0.3251 | -0.0832 | 1.0715  | 1.3258  | 1.1968  | 1.0251  | 1.4762  | 1.5273  | 0.3898  | 0.5357  |
| 1457 | S-913_P188  | P18858  | DNA ligase 1 (EC LIG1                 | -1.0441 | -1.2549 | -0.9669 | -0.9221 | -1.1020 | -1.1049 | -1.1205 | -1.2496 | -0.8459 | -1.0780 |
| 1458 | S-914_Q9UC  | Q9UCQ35 | Serine/arginine rich SRRM2 KIAA       | 1.6289  | 1.6318  | 2.3561  | 2.7142  | 2.5245  | 2.3825  | 2.7593  | 2.5262  | 2.4562  | 2.6475  |
| 1459 | S-915_Q9P1  | Q9P1Y6  | PHD and RING finger PHRF1 KIAA        | -2.0628 | -1.7816 | -2.3569 | -2.2542 | -2.3946 | -2.4956 | -2.6258 | -2.2679 | -2.1493 | -2.1138 |
| 1460 | S-916_Q165  | Q16512  | Serine/threonine kinase PKN1 PAK1 I   | -0.5007 | -0.3949 | -0.9245 | -0.8118 | -0.9308 | -1.1973 | -0.6977 | -1.2316 | -0.8647 | -0.7276 |
| 1461 | S-920_Q9BY  | Q9BYX2  | TBC1 domain family TBC1D2 PAR         | -0.4504 | -0.7608 | -0.5565 | -0.5369 | -0.3123 | -0.5887 | -0.7557 | -0.6347 | -0.8600 | -0.7796 |
| 1462 | S-922_Q140  | Q14005  | Pro-interleukin-1 IL16                | 0.4247  | 0.6566  | -0.2115 | -0.1563 | -0.0592 | -0.1904 | 0.1800  | -0.0573 | -0.1806 | 0.0063  |
| 1463 | S-923_Q6PJ  | Q6PJG2  | Mitotic deacetylase MIDEAS C14        | -5.4703 | -5.5403 | -5.9689 | -4.3782 | -5.1544 | -5.9218 | -5.8697 | -5.7952 | -5.2082 | -4.0220 |
| 1464 | S-927_Q9UK  | Q9UK61  | Protein TASOR (TASOR C3orf            | -1.3502 | -1.4022 | -1.7141 | -1.2584 | -1.4742 | -1.7926 | -1.2048 | -1.3552 | -1.7663 | -1.3657 |
| 1465 | S-928_Q9Y2  | Q9Y2W1  | Thyroid hormone receptor THRAP3 BCL   | -0.4018 | -0.3211 | -0.2710 | -0.2670 | -0.2387 | -0.1620 | -0.2706 | -0.1615 | -0.2217 | -0.0848 |
| 1466 | S-93_P3523  | P35236  | Tyrosine-protein PTPN7                | 0.1190  | -0.0505 | 0.7181  | 0.8451  | 0.5940  | 0.6923  | 0.5520  | 0.6392  | 0.5626  | 0.5336  |
| 1467 | S-93_Q0966  | Q09666  | Neuroblast differentiation AHNAK PM2  | -1.6628 | -1.1457 | -1.2021 | -1.1486 | -1.8292 | -1.5341 | -1.4174 | -1.4831 | -1.9032 | -2.2554 |
| 1468 | S-930_P335  | P33527  | Multidrug resistance ABCB1 MRP        | 0.2801  | 0.6109  | -0.3120 | 0.2848  | 0.1544  | 0.3944  | 0.5914  | 0.2973  | -0.5395 | -0.6327 |
| 1469 | S-932_Q929  | Q92974  | Rho guanine nucleotide ARHGEF2 KI     | 0.5184  | 0.4362  | 0.2414  | 0.5051  | 0.1774  | 0.1307  | 0.5181  | -0.1013 | -0.0065 | 0.1812  |
| 1470 | S-936_Q9P1  | Q9P1Y6  | PHD and RING finger PHRF1 KIAA        | -0.4187 | -0.5006 | -0.1971 | -0.1697 | -0.2919 | -0.5577 | -0.5440 | -0.3768 | -0.2217 | -0.2403 |
| 1471 | S-938_Q754  | Q75400  | Pre-mRNA-processing PRPF40A FBI       | 0.5372  | 0.1954  | 0.7157  | 0.4266  | 0.6888  | 0.7121  | 0.4089  | 0.5819  | 0.7896  | 0.5655  |
| 1472 | S-94_I3L1I5 | I3L1I5  | Rho guanine nucleotide ARHGEF18 K     | -1.1703 | -1.2821 | -1.1767 | -1.0660 | -1.0863 | -0.8829 | -1.3730 | -1.2700 | -1.1540 | -1.1497 |
| 1473 | S-94_P1858  | P18583  | Protein SON (Bax) SON C21orf          | 1.3605  | 1.0979  | 1.1233  | 0.9382  | 1.1436  | 0.9354  | 1.2725  | 1.2696  | 1.0058  | 0.6549  |
| 1474 | S-94_Q0183  | Q01831  | DNA repair protein XPC XPC            | 0.4657  | 0.3835  | 0.5580  | 0.2587  | 0.6300  | 0.7950  | 0.4825  | 0.4801  | 0.5825  | 0.5574  |
| 1475 | S-94_Q53EL  | Q53EL6  | Programmed cell death PDCD4 H731      | 2.5409  | 2.7684  | 1.9328  | 2.3808  | 2.1146  | 1.8192  | 2.4560  | 2.1265  | 1.5671  | 1.5299  |
| 1476 | S-94_Q9NQ   | Q9NQG6  | Mitochondrial dynamics MIEF1 MID5     | -0.0761 | -0.0703 | -0.2572 | -0.0674 | -0.2717 | -0.1888 | -0.3039 | -0.7203 | -0.6252 | -0.3942 |
| 1477 | S-942_Q607  | Q60763  | General vesicular transport USO1 VDP  | -0.7516 | -0.8116 | -0.6753 | -0.5038 | -0.7123 | -0.5197 | -0.7136 | -0.6255 | -0.7455 | -0.6964 |
| 1478 | S-947_Q723  | Q72333  | Probable helicase SETX ALS4 KI        | -0.5634 | -0.5861 | -0.4511 | -0.2352 | 0.0210  | -0.3238 | -0.1404 | -0.3147 | -0.3652 | -0.0405 |
| 1479 | S-948_P517  | P51784  | Ubiquitin carboxyl-terminal UBX1 UHX1 | -1.3923 | -1.3761 | -1.7737 | -1.5761 | -1.5423 | -1.8397 | -1.8792 | -1.3052 | -1.6474 | -1.5798 |
| 1480 | S-95_Q96NY  | Q96NY9  | Crossover junction MUS81              | -2.1890 | -1.9088 | -2.9127 | -2.8434 | -3.2562 | -2.9332 | -2.6914 | -2.6065 | -2.1493 | -2.3492 |
| 1481 | S-95_Q9BW   | Q9BW61  | DET1- and DDB1- dependent DDA1 C19orf | -2.7450 | -2.7221 | -2.4979 | -2.1118 | -2.2760 | -2.5448 | -1.8643 | -1.8322 | -2.4797 | -2.5594 |
| 1482 | S-952_Q607  | Q60763  | General vesicular transport USO1 VDP  | -0.8265 | -0.8027 | -0.5907 | -0.8087 | -0.6919 | -0.4935 | -1.0597 | -0.9082 | -0.7954 | -1.0142 |

|      |            |        |                                |         |         |         |         |         |         |         |         |         |         |
|------|------------|--------|--------------------------------|---------|---------|---------|---------|---------|---------|---------|---------|---------|---------|
| 1483 | S-953_O750 | O75064 | DENN domain-cc DENND4B KIAA    | -0.7823 | -0.6699 | -0.5411 | -0.4299 | -0.9699 | -0.6457 | -0.6480 | -0.6708 | -0.3837 | -0.5251 |
| 1484 | S-953_Q96C | Q96Q05 | Trafficking protei TRAPP9 KIAA | -0.5527 | -0.6727 | -0.5904 | -0.6942 | -0.8787 | -0.5178 | -0.5949 | -0.4501 | -1.1771 | -1.0472 |
| 1485 | S-954_Q9UC | Q9UQ35 | Serine/arginine r SRRM2 KIAA   | -0.5634 | -0.3533 | -0.2978 | 0.1390  | -0.2806 | -0.2388 | -0.4559 | -0.1667 | -0.0342 | -0.1419 |
| 1486 | S-956_Q5T1 | Q5T1M5 | FK506-binding pr FKBP15 KIAA   | -0.6013 | -0.2106 | -1.0752 | -0.9947 | -1.0981 | -1.6044 | -1.0925 | -1.3669 | -1.1696 | -1.1998 |
| 1487 | S-957_Q9UF | Q9UPU7 | TBC1 domain fan TBC1D2B KIAA   | 1.4877  | 1.3472  | 1.6647  | 1.5885  | 1.4381  | 1.5013  | 1.4574  | 1.3865  | 1.2125  | 1.2020  |
| 1488 | S-958_Q007 | Q00722 | 1-phosphatidylin PLCB2         | -1.0818 | -1.1677 | -1.3277 | -1.7210 | -0.9343 | -1.3944 | -1.0842 | -1.4029 | -1.3702 | -1.1166 |
| 1489 | S-958_Q996 | Q99683 | Mitogen-activate MAP3K5 ASH1   | -1.4406 | -1.2261 | -0.7737 | -0.7687 | -1.2258 | -0.9618 | -1.1928 | -0.9197 | -1.3141 | -1.1910 |
| 1490 | S-96_P0268 | P02686 | Myelin basic pro: MBP          | -0.1808 | -0.2856 | 0.7701  | 0.1975  | 0.4670  | 0.1550  | 0.3469  | 0.2747  | 0.0611  | -0.0484 |
| 1491 | S-96_P5360 | P53602 | Diphosphomeval MVD MPD         | -0.3274 | -0.2762 | -0.7384 | -1.2584 | -0.7465 | -1.3634 | -0.6059 | -1.2316 | -0.7909 | -0.7361 |
| 1492 | S-96_Q9ULL | Q9ULL5 | Proline-rich prot: PRR12 KIAA  | 1.0135  | 0.7661  | 1.0244  | 1.1005  | 1.1030  | 0.6594  | 1.2150  | 0.9303  | 0.9211  | 1.0716  |
| 1493 | S-960_Q929 | Q92974 | Rho guanine nuc ARHGEF2 KIAA   | 0.0723  | 0.0734  | -0.2032 | -0.1818 | -0.1854 | -0.1939 | -0.1884 | -0.5098 | -0.4586 | -0.3264 |
| 1494 | S-961_Q928 | Q92834 | X-linked retinitis RPGR RP3 XI | -1.7761 | -1.6472 | -0.8970 | -1.1919 | -1.1060 | -1.7519 | -0.8093 | -1.1112 | -1.2981 | -1.8685 |
| 1495 | S-961_Q9Y4 | Q9Y4E8 | Ubiquitin carbox USP15 KIAA    | -0.6601 | -0.8759 | -0.6585 | -0.9356 | -0.8522 | -0.5599 | -0.7125 | -0.7127 | -0.6454 | -0.6691 |
| 1496 | S-97_P6192 | P61927 | 60S ribosomal pr RPL37         | -1.3049 | -1.0347 | -0.2398 | 0.3781  | -0.0863 | -0.4748 | -0.0583 | -0.0403 | -0.0396 | -0.0142 |
| 1497 | S-97_Q96T3 | Q96T37 | RNA-binding pro: RBM15 OTT     | -2.6745 | -2.8007 | -2.0533 | -2.2627 | -1.7009 | -2.2565 | -1.6789 | -1.7077 | -2.3271 | -2.1249 |
| 1498 | S-97_Q9C0K | Q9C0K0 | B-cell lymphoma BCL11B CTIP    | 0.7954  | 0.7504  | 1.2449  | 1.2782  | 1.3876  | 1.4302  | 1.2639  | 1.2460  | 1.6643  | 1.6804  |
| 1499 | S-970_Q6PD | Q6PD62 | RNA polymerase CTR9 KIAA001    | 0.2681  | 0.6545  | 0.1233  | 0.1566  | 0.1936  | -0.1161 | -0.0569 | 0.1425  | 0.1102  | 0.0994  |
| 1500 | S-973_P463 | P46379 | Large proline-ricl BAG6 BAT3 C | -0.7334 | -0.4881 | 0.1348  | 0.4305  | -0.5776 | -0.3350 | -0.9858 | -0.9758 | -0.6252 | -0.8109 |
| 1501 | S-973_Q9P1 | Q9P1Y6 | PHD and RING fir PHRF1 KIAA    | -0.2982 | -0.1966 | -0.6210 | -0.2352 | -0.4489 | -0.9190 | -0.6706 | -0.8911 | -0.6721 | -0.2773 |
| 1502 | S-974_Q140 | Q14005 | Pro-interleukin-1 IL16         | -0.7547 | -1.2410 | 1.6905  | 1.3277  | 1.7614  | 1.0263  | 1.9825  | 1.2737  | 1.2835  | 0.9280  |
| 1503 | S-974_Q9UC | Q9UQ35 | Serine/arginine r SRRM2 KIAA   | -0.2805 | 0.8097  | 0.9853  | 0.9391  | 0.8851  | 0.8895  | 0.8431  | 0.8822  | 0.9328  | 1.1048  |
| 1504 | S-975_P085 | P08575 | Receptor-type ty PTPRC CD45    | 0.5025  | 0.3208  | 0.0317  | 0.0307  | -0.0806 | 0.2317  | -0.0060 | -0.0404 | 0.1377  | 0.1819  |
| 1505 | S-98_Q1389 | Q13895 | Bystin BYSL ENP1               | 0.1989  | 0.1432  | 0.1610  | -0.2067 | 0.1495  | 0.1659  | 0.0812  | 0.1841  | -0.5453 | -0.5209 |
| 1506 | S-98_Q1481 | Q14814 | Myocyte-specific MEF2D         | -0.1973 | -0.2910 | -0.2660 | -0.1617 | -0.2236 | -0.1339 | -0.2566 | -0.2939 | -0.2602 | -0.1677 |
| 1507 | S-98_Q9BSL | Q9BSL1 | Ubiquitin-associ UBAC1 GBDI    | -0.4728 | -0.5712 | -0.3650 | -0.5867 | -0.1854 | -0.1097 | -0.4017 | -0.5207 | -0.4658 | -0.4599 |
| 1508 | S-98_Q9NS5 | Q9NS56 | E3 ubiquitin-prot TOPORS LUN   | 1.0384  | 1.0393  | 0.8986  | 1.0871  | 1.1073  | 1.1436  | 0.8880  | 0.9327  | 0.9039  | 0.6968  |
| 1509 | S-98_Q9UBE | Q9UBB9 | Tuftelin-interacti TFIP11 STIP | 0.8192  | 1.0366  | 1.1739  | 0.9354  | 0.8436  | 1.0045  | 0.7885  | 0.9931  | 1.0505  | 0.7126  |
| 1510 | S-981_Q8IX | Q8IX03 | Protein KIBRA (H WWC1 KIAA     | -2.1222 | -1.5663 | -0.0506 | -0.4508 | -0.2045 | -0.8460 | -0.1449 | -0.4272 | 0.0962  | 0.5894  |
| 1511 | S-983_Q083 | Q08378 | Golgin subfamily GOLGA3        | -0.5877 | -0.6787 | -0.4554 | -0.4204 | -0.1708 | -0.2336 | -0.3167 | -0.3948 | -0.2633 | -0.2945 |
| 1512 | S-985_Q994 | Q99490 | Arf-GAP with GTI AGAP2 CENT    | -0.7576 | -0.9748 | -1.0084 | -1.5189 | -1.1750 | -1.0060 | -1.4774 | -1.2388 | -1.1608 | -1.0431 |
| 1513 | S-988_Q86Y | Q86YV0 | RAS protein activ RASAL3       | -0.7261 | -1.0647 | -0.0372 | -0.2570 | -0.7533 | -0.2320 | -0.3847 | -0.3501 | -0.4483 | -0.4637 |
| 1514 | S-989_Q5VZ | Q5VZ89 | DENN domain-cc DENND4C C       | -1.5528 | -2.1188 | -1.7954 | -1.6863 | -2.0902 | -1.5252 | -1.7778 | -1.5880 | -1.5643 | -1.5344 |
| 1515 | S-99_P1386 | P13861 | cAMP-dependen PRKAR2A PK       | -0.6183 | -0.6617 | -0.5277 | -0.5881 | -0.8121 | -0.7848 | -0.7982 | -0.6746 | -0.5567 | -0.3783 |
| 1516 | S-99_Q1318 | Q13185 | Chromobox prot: CBX3           | 1.9531  | 1.8307  | 1.9966  | 2.1382  | 1.9195  | 1.9745  | 1.9346  | 1.8835  | 1.4923  | 0.9152  |
| 1517 | S-99_Q1476 | Q14761 | Protein tyrosine PTPRCAP LP    | 0.5594  | 1.1046  | 0.2191  | 0.2950  | -0.2475 | -0.1990 | 0.1409  | 0.0000  | -0.1221 | 0.0752  |
| 1518 | S-99_Q5D1E | Q5D1E8 | Endoribonucleas ZC3H12A M      | -0.2224 | -0.2030 | -0.3677 | -0.4762 | -0.3423 | -0.7444 | -0.5516 | -0.4171 | -0.4338 | -0.4885 |
| 1519 | S-99_Q5TAC | Q5TAQ9 | DDB1- and CUL4- DCAF8 H326     | -1.8137 | -1.2496 | -2.2287 | -2.0197 | -2.1139 | -2.6272 | -2.1988 | -2.4232 | -3.1725 | -3.7043 |
| 1520 | S-991_Q9P1 | Q9P1Y6 | PHD and RING fir PHRF1 KIAA    | -0.1767 | -0.0588 | -0.8970 | -0.3968 | -0.3493 | -0.8802 | -0.1884 | -0.5361 | -1.0329 | -0.7885 |
| 1521 | S-993_Q6W  | Q6WCQ1 | Myosin phospho: MPRIP KIAA     | 0.6486  | 0.4435  | 0.8640  | 0.6207  | 0.6934  | 0.6929  | 0.4860  | 0.5320  | 0.3382  | 0.2270  |

|      |             |        |                         |             |         |         |         |         |         |         |         |         |         |         |
|------|-------------|--------|-------------------------|-------------|---------|---------|---------|---------|---------|---------|---------|---------|---------|---------|
| 1522 | S-994_Q86Y  | Q86YV0 | RAS protein activ       | RASAL3      | 1.0919  | 1.1020  | 1.4257  | 1.4312  | 1.2908  | 1.6356  | 1.4312  | 1.6222  | 1.0574  | 1.0337  |
| 1523 | S-994_Q9UF  | Q9UPS6 | Histone-lysine N-       | SETD1B KIAA | -1.3595 | -1.0100 | -0.8100 | -0.3712 | -0.8064 | -0.7173 | -0.9082 | -1.2790 | -0.8577 | -0.6711 |
| 1524 | S;S-100 107 | Q86YP4 | Transcriptional r       | GATAD2A     | -1.0403 | -0.9682 | -0.9486 | -1.0599 | -1.1100 | -0.8370 | -1.3039 | -1.4946 | -1.0571 | -1.0511 |
| 1525 | S;S-1012 10 | O95785 | Protein Wiz (Wid        | WIZ ZNF803  | -0.6459 | -0.8759 | -0.8509 | -0.9187 | -0.9520 | -1.1905 | -0.8792 | -0.8940 | -1.1902 | -1.0834 |
| 1526 | S;S-1017 10 | Q7Z333 | Probable helicase       | SETX ALS4 K | -0.5187 | -0.7110 | -0.1223 | -0.2185 | -0.4264 | -0.1081 | -0.5196 | -0.5540 | -0.2385 | -0.1822 |
| 1527 | S;S-102 103 | P17096 | High mobility grc       | HMGA1 HM    | 0.2861  | 0.1740  | 0.3390  | 0.1390  | 0.4442  | 0.4769  | 0.4137  | 0.2022  | -0.0196 | 0.3155  |
| 1528 | S;S-102 105 | P05387 | 60S acidic riboso       | RPLP2 D11S  | 1.1950  | 1.1347  | 0.6444  | 0.4226  | 0.8880  | 0.9283  | 0.9226  | 1.0613  | 0.9644  | 0.9655  |
| 1529 | S;S-1023 10 | Q01804 | OTU domain-con          | OTUD4 HIN   | 0.9438  | 0.8697  | 1.1608  | 1.0334  | 0.9360  | 1.0803  | 0.9784  | 1.0788  | 0.9314  | 0.7883  |
| 1530 | S;S-103 105 | Q14839 | Chromodomain-l          | CHD4        | 0.4258  | 0.3467  | 0.8454  | 0.3712  | 0.3960  | 0.4169  | 0.3772  | 0.2620  | 0.6440  | 0.8517  |
| 1531 | S;S-103 106 | O60231 | Pre-mRNA-splicir        | DHX16 DBP2  | -0.0876 | -0.0634 | -0.0031 | -0.1899 | -0.3192 | -0.0670 | -0.2959 | -0.2679 | 0.0511  | 0.1925  |
| 1532 | S;S-104 106 | O43159 | Ribosomal RNA- $\gamma$ | RRP8 KIAA0  | 0.7755  | 0.5227  | 1.2742  | 1.4246  | 1.2969  | 1.2406  | 1.3535  | 1.3152  | 1.1216  | 1.3881  |
| 1533 | S;S-108 110 | Q8WUQ7 | Cactin (Renal car       | CACTIN C19  | -0.3116 | -0.1802 | -0.0479 | 0.2657  | 0.0246  | -0.2816 | -0.2123 | -0.0169 | -0.1536 | -0.0378 |
| 1534 | S;S-1085 10 | O14647 | Chromodomain-l          | CHD2        | -0.0422 | -0.1578 | 0.5425  | 0.5616  | 0.3649  | 0.1389  | 1.0961  | 0.5819  | -0.1464 | -0.0862 |
| 1535 | S;S-109 111 | Q56P03 | E2F-associated p        | EAPP C14orf | -1.0780 | -1.4711 | 0.7553  | 0.3449  | 0.4100  | 0.7524  | -0.1233 | 0.4505  | 0.9396  | 0.9727  |
| 1536 | S;S-109 111 | Q86XP3 | ATP-dependent f         | DDX42       | 0.1130  | -0.0011 | -0.4626 | -0.5787 | -0.2606 | -0.2744 | -0.2911 | -0.5585 | -0.3485 | -0.3378 |
| 1537 | S;S-11 13_C | Q92685 | Dol-P-Man:Man(          | ALG3 NOT N  | -1.6459 | -1.7038 | -1.1663 | -0.6891 | -0.7652 | -0.7370 | -0.7210 | -0.7228 | -1.3370 | -1.0458 |
| 1538 | S;S-112 115 | Q9P287 | BRCA2 and CDKN          | BCCIP TOK1  | -2.6977 | -2.6823 | -2.8434 | -2.4252 | -2.6365 | -3.0764 | -2.9884 | -2.8274 | -2.7057 | -2.8544 |
| 1539 | S;S-1122 11 | Q9UQ35 | Serine/arginine r       | SRRM2 KIAA  | -0.9892 | -0.6524 | -1.2710 | -1.2123 | -0.9991 | -1.5731 | -1.1605 | -1.2352 | -1.2293 | -1.1504 |
| 1540 | S;S-115 119 | Q7Z309 | Protein FAM122l         | FAM122B     | 0.6312  | 0.4749  | 1.0680  | 1.1858  | 0.7025  | 0.8831  | 0.8489  | 0.9668  | 1.0429  | 0.9707  |
| 1541 | S;S-116 118 | P55081 | Microfibrillar-ass      | MFAP1       | 0.3154  | 0.2260  | -0.2348 | -0.1818 | -0.0844 | -0.3201 | -0.2612 | -0.3788 | -0.3223 | -0.2633 |
| 1542 | S;S-116 120 | Q6JBY9 | CapZ-interacting        | RCS1 CAPZ   | 0.1146  | 0.0066  | 0.3652  | 0.1438  | 0.0867  | 0.1033  | -0.0091 | 0.0555  | 0.0536  | -0.1124 |
| 1543 | S;S-1161 11 | P46100 | Transcriptional r       | ATRX RAD54  | 0.1345  | 0.3007  | 0.2686  | 0.9694  | 0.6377  | 1.1348  | 0.9013  | 0.9808  | 0.5342  | 0.8229  |
| 1544 | S;S-121 122 | P41236 | Protein phospho         | PPP1R2 IPP2 | 0.4953  | 0.5272  | 0.8854  | 0.8182  | 0.7279  | 1.0257  | 0.5081  | 0.7242  | 1.0019  | 0.6110  |
| 1545 | S;S-121 124 | Q9Y5J1 | U3 small nucleol        | UTP18 WDR   | 0.2644  | 0.4428  | 0.6909  | 0.9691  | 0.5256  | 0.6808  | 0.6523  | 0.4513  | 0.3392  | 0.5406  |
| 1546 | S;S-125 133 | Q6NYC8 | Phostensin (Prot        | PPP1R18 HK  | -0.5037 | -0.3311 | 0.7194  | 0.0714  | 0.1461  | 0.3418  | 0.1418  | 0.2448  | 0.4885  | 0.2426  |
| 1547 | S;S-126 129 | Q96BR1 | Serine/threonine        | SGK3 CISK S | 1.2470  | 1.1794  | 0.6350  | 1.0796  | 1.0814  | 0.7184  | 1.4010  | 0.7845  | 0.4007  | 0.6888  |
| 1548 | S;S-1268 12 | Q96T58 | Msx2-interacting        | SPEN KIAA0  | 0.0215  | 0.1532  | 0.3139  | 0.4106  | 0.4238  | 0.3022  | 0.5007  | 0.4727  | 0.3258  | 0.2724  |
| 1549 | S;S-1281 12 | Q8WWQ0 | PH-interacting pr       | PHIP DCAF1  | 0.5234  | 0.7312  | 0.2379  | 0.2114  | 0.0657  | -0.0842 | 0.2222  | -0.3377 | -0.0026 | 0.0543  |
| 1550 | S;S-1306 13 | Q14160 | Protein scribble l      | SCRIB CRIB1 | -0.9398 | -0.7664 | -0.3068 | -0.7447 | -0.4691 | -0.4706 | -0.5960 | -0.2424 | -0.8022 | -0.6814 |
| 1551 | S;S-131 137 | O60341 | Lysine-specific hi      | KDM1A AOF   | -0.4480 | -0.3183 | -1.3382 | -1.2542 | -1.1020 | -1.3257 | -1.0705 | -1.1479 | -1.3109 | -1.2479 |
| 1552 | S;S-131 138 | O75446 | Histone deacetyl        | SAP30       | -2.3093 | -1.9510 | -1.9048 | -1.7932 | -2.3850 | -2.2565 | -2.0569 | -2.2679 | -3.2324 | -3.3624 |
| 1553 | S;S-1315 13 | Q6F5E8 | Capping protein,        | CARMIL2 LR  | -0.8988 | -0.6334 | -0.7809 | -0.9459 | -0.5831 | -0.5490 | -0.7890 | -0.6395 | -0.5974 | -0.3841 |
| 1554 | S;S-132 133 | P51858 | Hepatoma-deriv          | HDGF HMG1   | 0.9726  | 1.2740  | 0.7144  | 0.9223  | 0.7977  | 1.0957  | 0.6069  | 0.9769  | 1.0410  | 0.8403  |
| 1555 | S;S-134 143 | Q8NDX1 | PH and SEC7 don         | PSD4 EFA6B  | 1.3015  | 1.2826  | 1.1253  | 1.0880  | 0.7817  | 1.1442  | 1.1214  | 1.1713  | 0.4895  | 0.3792  |
| 1556 | S;S-1348 13 | P46100 | Transcriptional r       | ATRX RAD54  | 1.3527  | 1.6007  | 1.5804  | 1.7669  | 1.5804  | 1.6390  | 1.6322  | 1.5556  | 1.5516  | 1.4795  |
| 1557 | S;S-135 138 | Q15388 | Mitochondrial irr       | TOMM20 KI   | -1.9892 | -1.9214 | -0.0063 | 0.0036  | 0.7850  | 0.9707  | 0.7855  | 0.7774  | 0.1494  | -0.0391 |
| 1558 | S;S-136 138 | Q9HAZ1 | Dual specificity p      | CLK4        | -0.0311 | 0.1944  | -0.1453 | -0.0036 | -0.0902 | -0.0515 | 0.1941  | 0.0730  | -0.0789 | -0.1764 |
| 1559 | S;S-1369 13 | O14647 | Chromodomain-l          | CHD2        | 0.0995  | 0.1462  | 0.1538  | 0.2478  | 0.2064  | 0.1841  | 0.1148  | 0.1075  | 0.2337  | 0.2048  |
| 1560 | S;S-14 15_C | Q12846 | Syntaxin-4 (Rena        | STX4 STX4A  | 0.4696  | 0.5002  | 1.0275  | 1.1590  | 1.1260  | 0.8927  | 1.0315  | 1.1881  | 0.7035  | 1.1554  |

|      |                    |                                |         |         |         |         |         |         |         |         |         |         |
|------|--------------------|--------------------------------|---------|---------|---------|---------|---------|---------|---------|---------|---------|---------|
| 1561 | S;S-142 144 Q13523 | Serine/threonine PRPF4B KIAA   | 0.2132  | 0.1698  | 0.1495  | 0.1474  | 0.1361  | 0.0796  | -0.0488 | 0.0014  | 0.2696  | 0.3274  |
| 1562 | S;S-143 147 Q96E09 | Protein FAM122, FAM122A C      | -0.1625 | -0.6334 | 0.6769  | 0.7288  | 0.3960  | 1.0612  | 0.4673  | 0.7836  | 0.8779  | 0.9063  |
| 1563 | S;S-1432 14 Q7Z591 | Microtubule org; AKNA KIAA1    | -0.8622 | -0.9109 | -0.7612 | -0.7901 | -1.6251 | -0.7620 | -0.5459 | -0.5698 | -1.6680 | -1.2882 |
| 1564 | S;S-1439 14 Q9UQ35 | Serine/arginine r SRRM2 KIAA   | -1.1089 | -0.8902 | -0.3867 | -0.3507 | -0.3353 | -0.5167 | -0.2243 | -0.3338 | -0.2885 | -0.2297 |
| 1565 | S;S-145 148 Q86VQ1 | Glucocorticoid-ir GLCCI1       | -0.5634 | -0.9361 | 0.3013  | 0.5962  | 0.1692  | 0.1061  | 0.5662  | 0.3377  | -0.1947 | -0.3152 |
| 1566 | S;S-145 153 P19338 | Nucleolin (Protei NCL          | 1.1739  | 1.1611  | -0.0825 | -0.1177 | 0.2932  | 0.0606  | 0.4146  | 0.1195  | -0.0047 | -0.0230 |
| 1567 | S;S-1461 14 Q02880 | DNA topoisomer TOP2B           | -0.3206 | -0.2575 | -0.8210 | -0.7269 | -0.7281 | -1.0795 | -0.9477 | -0.5585 | -0.7227 | -0.5817 |
| 1568 | S;S-1462 14 Q9UQ35 | Serine/arginine r SRRM2 KIAA   | 0.6195  | 0.5010  | 0.1900  | -0.0730 | 0.7205  | 0.5013  | 0.5618  | 0.4815  | 1.0341  | 1.3896  |
| 1569 | S;S-148 149 Q9Y388 | RNA-binding moi RBMX2 CGI-     | 0.1525  | 0.0713  | 0.0311  | 0.2221  | 0.1243  | 0.4971  | 0.0104  | 0.0137  | 0.2665  | 0.1042  |
| 1570 | S;S-148 151 Q15185 | Prostaglandin E s PTGES3 P23   | -0.9157 | -1.2575 | -2.4340 | -3.3598 | -2.2044 | -2.7222 | -1.6419 | -2.2244 | -2.4930 | -2.4371 |
| 1571 | S;S-15 17_A A2AJT9 | BCLAF1 and THR, BCLAF3 CXo     | 0.5247  | 0.6167  | 0.7201  | 0.6962  | 0.5748  | 0.5138  | 0.6221  | 0.6112  | 0.6052  | 0.4572  |
| 1572 | S;S-15 17_C Q9NZ63 | Telomere length C9orf78 HCA    | -1.0628 | -1.3448 | -1.2019 | -0.9493 | -1.0746 | -0.9388 | -1.0039 | -0.9431 | -0.8624 | -1.0780 |
| 1573 | S;S-1512 15 P51531 | Probable global t SMARCA2 B,   | 0.1329  | 0.2826  | 0.1734  | 0.2993  | 0.3820  | 0.5149  | 0.0796  | 0.1928  | 0.1750  | -0.0551 |
| 1574 | S;S-1514 15 Q8NI27 | THO complex su t THOC2 CXor    | 1.3255  | 1.3782  | 1.6293  | 1.4792  | 1.5071  | 1.5417  | 1.3732  | 1.4951  | 1.7733  | 1.4749  |
| 1575 | S;S-1517 15 Q9UQ35 | Serine/arginine r SRRM2 KIAA   | -0.1706 | 0.0490  | 0.9762  | 0.7039  | 0.6424  | 0.4683  | 0.7496  | 0.7042  | 0.6737  | 0.9335  |
| 1576 | S;S-1537 15 Q43149 | Zinc finger ZZ-ty t ZFE1 KIAA0 | -1.6123 | -1.8241 | -1.1223 | -1.4688 | -1.0824 | -1.0240 | -0.5122 | -0.6854 | -1.5798 | -1.5381 |
| 1577 | S;S-154 156 Q9BTC0 | Death-inducer o t DIDO1 C20o   | 0.1879  | 0.3432  | 0.6977  | 0.5629  | 0.6797  | 0.5221  | 0.3752  | 0.5011  | 1.1078  | 1.1508  |
| 1578 | S;S-1541 15 Q9UQ35 | Serine/arginine r SRRM2 KIAA   | 1.1113  | 1.2279  | 1.0326  | 1.0947  | 1.5283  | 1.0119  | 1.3837  | 1.0302  | 1.4424  | 1.6663  |
| 1579 | S;S-155 157 Q15287 | RNA-binding pro RNPS1 LDC2     | 1.2971  | 0.9109  | 1.6945  | 1.9015  | 2.1688  | 1.3705  | 2.5599  | 1.6468  | 1.5662  | 2.2684  |
| 1580 | S;S-156 157 P28715 | DNA repair prote ERCC5 ERCN    | 0.0993  | 0.1191  | 0.1655  | 0.1109  | 0.1279  | 0.1705  | -0.1420 | 0.1746  | 0.1880  | 0.3378  |
| 1581 | S;S-156 159 Q7Z5K2 | Wings apart-like WAPL FOE K    | 0.3140  | 0.5668  | 0.1272  | 0.4463  | 0.0762  | 0.1590  | 0.2574  | 0.2722  | 0.0334  | 0.1732  |
| 1582 | S;S-1561 15 Q9UQ35 | Serine/arginine r SRRM2 KIAA   | -0.0719 | -0.0041 | 0.4929  | 0.6231  | 0.8040  | 0.7607  | 0.8141  | 0.7903  | 0.8346  | 0.9719  |
| 1583 | S;S-1568 15 P51531 | Probable global t SMARCA2 B,   | 1.4780  | 1.9346  | 0.9958  | 0.3971  | 0.9465  | 0.7030  | 1.0359  | 0.5299  | 0.8075  | 0.6467  |
| 1584 | S;S-157 159 Q92733 | Proline-rich prot PRCC TPRC    | 1.4258  | 1.5753  | 1.2037  | 1.3294  | 1.0328  | 1.4236  | 1.1816  | 1.3841  | 1.4285  | 0.9994  |
| 1585 | S;S-157 159 Q96ST2 | Protein IWS1 ho IWS1 IWS1L     | 0.5958  | 0.5675  | 0.5926  | 0.3904  | 0.2612  | 0.3728  | 0.2779  | 0.4946  | 0.6842  | 0.5250  |
| 1586 | S;S-1570 15 P51532 | Transcription act SMARCA4 B,   | 0.7294  | 0.6124  | 0.1973  | 0.5520  | 0.4442  | 0.5978  | 0.6009  | 0.2233  | -0.1321 | -0.0339 |
| 1587 | S;S-159 160 Q9BW71 | HIRA-interacting HIRIP3        | 0.9230  | 0.9045  | 1.0135  | 0.9354  | 0.8821  | 0.8579  | 0.8689  | 0.9463  | 1.1376  | 0.9402  |
| 1588 | S;S-160 166 Q8N108 | Mesoderm induc MIER1 KIAA:     | 0.2949  | 0.2662  | 0.3838  | 0.3958  | 0.2566  | 0.4247  | 0.3961  | 0.4760  | 0.5070  | 0.5811  |
| 1589 | S;S-1601 16 Q12873 | Chromodomain-l CHD3            | 0.6136  | 0.5297  | 0.2028  | 0.2191  | 0.3678  | 0.5478  | 0.5785  | 0.6301  | 0.6306  | 0.7181  |
| 1590 | S;S-161 168 Q1KMD3 | Heterogeneous r HNRNPUL2 I     | 1.1958  | 1.8551  | 1.2405  | 0.9955  | 0.8831  | 1.1157  | 1.2443  | 1.0144  | 1.2220  | 1.0192  |
| 1591 | S;S-1620 16 Q9UQ35 | Serine/arginine r SRRM2 KIAA   | 0.5297  | 0.6844  | 0.9832  | 1.0124  | 1.2278  | 1.1643  | 1.0771  | 1.0925  | 1.3576  | 1.4302  |
| 1592 | S;S-1627 16 P51532 | Transcription act SMARCA4 B,   | 1.9177  | 2.2744  | 1.0037  | 0.7928  | 1.1494  | 0.9646  | 1.2827  | 0.8521  | 0.8319  | 0.8567  |
| 1593 | S;S-167 168 P32519 | ETS-related trans ELF1         | 0.9745  | 0.6975  | 2.0262  | 1.9617  | 1.7580  | 2.0615  | 1.8329  | 2.0547  | 2.0458  | 2.0242  |
| 1594 | S;S-17 19_P P53999 | Activated RNA pr SUB1 PC4 RF   | 0.9754  | 1.1920  | 1.1001  | 1.3144  | 0.8436  | 1.3285  | 0.7817  | 1.3195  | 1.2943  | 1.3014  |
| 1595 | S;S-170 172 Q9NYV6 | RNA polymerase RRN3 TIFIA      | 0.0392  | -0.0785 | -0.4060 | -0.2885 | -0.6801 | -0.7394 | -0.8792 | -0.6586 | -0.3652 | -0.6090 |
| 1596 | S;S-1721 17 Q14980 | Nuclear mitotic s NUMA1 NM     | -0.9964 | -0.9489 | -1.0021 | -1.0599 | -0.6223 | -0.7246 | -0.9527 | -0.7741 | -0.5077 | -0.8970 |
| 1597 | S;S-1727 17 Q9UQ35 | Serine/arginine r SRRM2 KIAA   | 0.9009  | 0.8655  | 0.7403  | 0.9110  | 0.9350  | 0.5978  | 0.7419  | 0.5890  | 0.6239  | 0.9131  |
| 1598 | S;S-173 175 Q9NPG3 | Ubinuclein-1 (HIF UBN1         | 1.1926  | 1.3133  | 0.9932  | 0.9929  | 0.9465  | 0.9400  | 0.9981  | 0.8880  | 0.7948  | 0.7141  |
| 1599 | S;S-1731 17 Q9UQ35 | Serine/arginine r SRRM2 KIAA   | 1.7954  | 1.8329  | 1.7531  | 1.9139  | 2.2309  | 2.1321  | 2.0049  | 2.1797  | 2.3725  | 2.4684  |

|      |                    |                               |         |         |         |         |         |         |         |         |         |         |
|------|--------------------|-------------------------------|---------|---------|---------|---------|---------|---------|---------|---------|---------|---------|
| 1600 | S;S-174 175 Q7Z4V5 | Hepatoma-deriv HDGFL2 HDG     | 0.7162  | 0.6254  | 0.7315  | 0.8030  | 0.6530  | 0.7382  | 0.4147  | 0.6232  | 0.6001  | 0.6176  |
| 1601 | S;S-176 180 Q9Y4C8 | Probable RNA-bi RBM19 KIAA    | -0.7485 | -0.8085 | -0.5688 | -0.7123 | -0.6451 | -0.5274 | -0.9180 | -0.8005 | -0.1565 | -0.0471 |
| 1602 | S;S-1762 17 Q9UQ35 | Serine/arginine r SRRM2 KIAA  | 0.9051  | 0.3819  | 0.9729  | 1.1693  | 1.2399  | 0.9762  | 0.8968  | 1.2254  | 0.9764  | 1.1207  |
| 1603 | S;S-181 183 Q16629 | Serine/arginine-r SRSF7 SFRS7 | -0.2330 | 0.3580  | 0.3038  | 0.0142  | 0.1428  | 0.0324  | 0.3097  | -0.0092 | 0.1102  | 0.3289  |
| 1604 | S;S-181 183 Q96B97 | SH3 domain-cont SH3KBP1 CIP   | 0.9503  | 0.8397  | 0.6578  | 0.7093  | 0.4415  | 0.8644  | 0.5144  | 0.7576  | 0.4482  | 0.3113  |
| 1605 | S;S-182 183 Q8ND56 | Protein LSM14 h LSM14A C19    | 0.6289  | 0.5949  | 0.9597  | 0.9576  | 0.9815  | 1.0389  | 1.1070  | 1.2703  | 0.6786  | 0.5169  |
| 1606 | S;S-182 185 Q8NF99 | Zinc finger protei ZNF397 ZNF | 0.6405  | 0.9003  | 0.7378  | 0.7147  | 0.6114  | 0.8710  | 0.5957  | 0.8039  | 0.9409  | 0.8503  |
| 1607 | S;S-185 188 Q1KMD3 | Heterogeneous r HNRNPUL2 I    | -0.5007 | -0.7256 | -0.0275 | 0.4528  | 0.1494  | 0.2113  | 0.0181  | 0.2428  | -0.1080 | -0.0794 |
| 1608 | S;S-1866 18 Q9UQ35 | Serine/arginine r SRRM2 KIAA  | -2.3641 | -1.9130 | -1.4171 | -1.1479 | -1.3192 | -1.9162 | -1.0144 | -1.2138 | -1.5003 | -1.2510 |
| 1609 | S;S-189 191 Q01130 | Serine/arginine-r SRSF2 SFRS2 | 1.4890  | 1.8286  | 0.4179  | 1.0515  | 1.0892  | 0.1984  | 1.3556  | 0.6399  | 0.7075  | 1.1078  |
| 1610 | S;S-190 191 Q9UNF1 | Melanoma-assoc MAGED2 BC      | -1.3274 | -0.8985 | -0.3731 | -0.4936 | -0.4564 | -0.3788 | -0.8070 | -0.5098 | -0.1769 | 0.0064  |
| 1611 | S;S-190 193 P22059 | Oxysterol-bindin OSBP OSBP1   | 0.6041  | 0.4837  | 0.7787  | 0.5398  | 0.5219  | 0.5700  | 0.3911  | 0.5727  | 0.6289  | 0.7868  |
| 1612 | S;S-193 194 Q8NAV1 | Pre-mRNA-splicir PRPF38A      | 0.1079  | 0.1412  | -0.5782 | -0.7299 | -0.1812 | -0.7051 | -0.3023 | -0.6347 | -0.3125 | -0.4061 |
| 1613 | S;S-194 196 Q16629 | Serine/arginine-r SRSF7 SFRS7 | 1.0165  | 1.1169  | 0.9700  | 1.0581  | 0.7422  | 0.5637  | 1.0053  | 0.9463  | 1.2468  | 1.2391  |
| 1614 | S;S-196 199 Q9BW71 | HIRA-interacting HIRIP3       | -0.4430 | -0.4051 | -0.2385 | 0.0863  | -0.2387 | -0.0210 | -0.1678 | -0.0247 | -0.3109 | -0.2648 |
| 1615 | S;S-20 23_C Q13523 | Serine/threonine PRPF4B KIAA  | 0.2105  | 0.2026  | -0.6019 | -0.6942 | -0.6868 | -0.6861 | -0.6666 | -0.7296 | -0.5984 | -0.4689 |
| 1616 | S;S-2009 20 P18583 | Protein SON (Ba) SON C21orf5  | 0.2052  | -0.0461 | 0.5374  | -0.0071 | 0.6600  | 0.1198  | -0.0026 | 0.0437  | 1.0822  | 1.0412  |
| 1617 | S;S-202 213 Q92882 | Osteoclast-stimu OSTF1        | -2.2224 | -2.5274 | -1.8547 | -1.8434 | -1.9991 | -1.9050 | -1.9033 | -1.8166 | -2.1784 | -2.6387 |
| 1618 | S;S-2029 20 P18583 | Protein SON (Ba) SON C21orf5  | -0.0553 | -0.0167 | 0.1069  | -0.0599 | 0.1124  | -0.2093 | -0.0222 | -0.2049 | 0.0549  | 0.0280  |
| 1619 | S;S-204 206 Q9H5J8 | TATA box-bindin; TAF1D JOSD   | -0.8954 | -0.8458 | -0.9689 | -0.6440 | -0.7434 | -0.8186 | -1.0170 | -0.7899 | -0.4146 | -0.4353 |
| 1620 | S;S-204 214 Q96JM3 | Chromosome ali; CHAMP1 C1     | 0.5284  | 0.4476  | 0.7265  | 0.8492  | 0.6739  | 0.7890  | 0.4408  | 0.4427  | 0.4755  | 0.4412  |
| 1621 | S;S-2044 20 Q9UQ35 | Serine/arginine r SRRM2 KIAA  | -0.0072 | -0.0336 | 0.3546  | 0.1598  | 0.2871  | -0.0195 | 0.2725  | -0.1178 | 0.6137  | 0.7444  |
| 1622 | S;S-206 209 Q96JY6 | PDZ and LIM don PDLIM2 PP6    | -1.2266 | -0.9726 | -0.3853 | -0.6329 | -0.1381 | -0.4624 | -0.4865 | -0.2120 | -1.0356 | -0.8154 |
| 1623 | S;S-209 213 Q6NYC8 | Phostensin (Prot) PPP1R18 HK  | -0.1344 | 0.0382  | 0.2816  | 0.9072  | 0.2795  | 0.5978  | 0.6555  | 0.5593  | -0.3223 | -0.0273 |
| 1624 | S;S-210 216 Q09666 | Neuroblast differ AHNAK PM2   | -0.3138 | -0.3732 | -0.8642 | -0.7718 | -1.0942 | -1.1973 | -0.8555 | -1.1046 | -1.8483 | -1.5195 |
| 1625 | S;S-210 216 Q8TBF4 | Zinc finger CCHC: ZCRB1       | -0.8105 | -0.9857 | -0.9567 | -1.2755 | -1.0326 | -0.9247 | -0.9578 | -1.0657 | -0.8647 | -1.3993 |
| 1626 | S;S-211 213 Q9BW85 | Splicing factor YJ YJU2 CCDC9 | 0.9115  | 0.7707  | 0.6756  | 0.7352  | 0.6877  | 0.5710  | 0.5662  | 0.5161  | 0.7684  | 0.7831  |
| 1627 | S;S-211 216 Q13242 | Serine/arginine-r SRSF9 SFRS9 | -0.8886 | -0.7716 | -1.2572 | -1.1963 | -1.2629 | -1.4463 | -1.0915 | -1.6733 | -1.5396 | -1.3333 |
| 1628 | S;S-2133 21 Q75643 | U5 small nuclear SNRNP200 A   | 1.4500  | 1.4160  | 1.0843  | 1.0465  | 0.6728  | 1.0731  | 0.7864  | 0.9891  | 0.8762  | 0.7139  |
| 1629 | S;S-215 217 Q16629 | Serine/arginine-r SRSF7 SFRS7 | 1.0714  | 1.1769  | 1.2974  | 1.7474  | 1.7272  | 1.2437  | 1.9588  | 1.5951  | 1.8765  | 1.9486  |
| 1630 | S;S-215 220 Q96PK6 | RNA-binding pro RBM14 SIP     | -0.8556 | -0.7627 | -0.1476 | 0.0212  | 0.1209  | 0.0015  | 0.3842  | -0.0046 | -0.3652 | 0.0115  |
| 1631 | S;S-2152 21 P21333 | Filamin-A (FLN-A FLNA FLN FL  | 1.0550  | 1.0607  | 1.2664  | 1.2516  | 1.0101  | 1.3449  | 1.2939  | 1.4234  | 0.6704  | 0.4933  |
| 1632 | S;S-217 220 Q96F15 | GTPase IMAP fan GIMAP5 IAN    | -0.3711 | -0.3833 | -0.2685 | -0.4228 | -0.3238 | -0.1323 | -0.0897 | -0.0450 | -0.7575 | -0.8452 |
| 1633 | S;S-22 26_P P52824 | Diacylglycerol kir DGKQ DAGK  | 0.4028  | 0.4022  | 0.3942  | 0.5879  | -0.0844 | -0.1145 | 0.0257  | 0.2658  | -0.0052 | -0.0155 |
| 1634 | S;S-222 226 Q9BRD0 | BUD13 homolog BUD13           | -0.3387 | -0.6129 | 0.2028  | 0.1866  | 0.1141  | 0.2506  | 0.0257  | 0.0628  | 0.2248  | 0.4841  |
| 1635 | S;S-223 234 Q9H1E3 | Nuclear ubiquito NUCKS1 NUU   | 0.2816  | 0.2514  | 0.3902  | 0.1819  | 0.1192  | 0.1061  | -0.0382 | 0.0091  | 0.5414  | 0.8359  |
| 1636 | S;S-224 232 Q13573 | SNW domain-cor SNW1 SKIIP     | -0.1050 | -0.1865 | 0.1367  | 0.2508  | 0.2856  | -0.0301 | 0.2574  | 0.0569  | 0.2215  | 0.2915  |
| 1637 | S;S-225 227 Q16629 | Serine/arginine-r SRSF7 SFRS7 | -0.6302 | -0.5171 | 1.0894  | 1.2429  | 1.1056  | 1.0781  | 1.3734  | 1.4201  | 1.5631  | 1.8199  |
| 1638 | S;S-225 228 Q92844 | TRAF family mem TANK ITRAF    | 1.0018  | 1.0372  | 1.3440  | 1.1788  | 0.8041  | 1.0971  | 0.6530  | 0.9589  | 0.8406  | 0.4307  |

|      |                    |                               |         |         |         |         |         |         |         |         |         |         |
|------|--------------------|-------------------------------|---------|---------|---------|---------|---------|---------|---------|---------|---------|---------|
| 1639 | S;S-228 231 Q86YV0 | RAS protein activ RASAL3      | -0.0991 | -0.2549 | -0.5095 | -0.5113 | -0.9520 | -0.6574 | -0.3611 | -0.7637 | -0.6742 | -0.4795 |
| 1640 | S;S-229 234 Q9H1E3 | Nuclear ubiquito NUCKS1 NU    | -0.2372 | -0.2106 | 0.2476  | 0.1422  | -0.2964 | -0.0670 | -0.4720 | 0.0889  | 0.4867  | 0.5620  |
| 1641 | S;S-23 25_C Q92619 | Rho GTPase-activ ARHGAP45 F   | 0.5633  | 0.7727  | -0.2345 | -0.2052 | -0.0918 | -0.5160 | -0.1662 | -0.5348 | -0.4363 | -0.1815 |
| 1642 | S;S-232 234 Q9NYF3 | Protein FAM53C FAM53C C5c     | -0.5715 | -0.9510 | -0.7935 | -0.5012 | -0.8423 | -0.8638 | -0.6399 | -1.0915 | -0.9129 | -0.7534 |
| 1643 | S;S-233 242 Q9Y6M7 | Sodium bicarbon SLC4A7 BT N   | 1.3484  | 1.1031  | 1.1780  | 1.7325  | 1.1201  | 1.1328  | 1.3159  | 1.0399  | 0.6777  | 0.7793  |
| 1644 | S;S-234 240 Q9H1E3 | Nuclear ubiquito NUCKS1 NU    | 0.2694  | 0.1776  | 0.3672  | 0.5183  | 0.0434  | -0.0368 | -0.1518 | -0.0630 | 0.3673  | 0.6371  |
| 1645 | S;S-236 243 Q13469 | Nuclear factor of NFATC2 NFA  | 1.2912  | 1.2726  | 0.7920  | 1.1874  | 0.7892  | 0.6771  | 1.0912  | 0.8230  | 0.5243  | 0.5725  |
| 1646 | S;S-238 240 Q8NHQ1 | Centrosomal pro CEP70 BITE    | 0.1671  | 0.0901  | 0.5518  | 0.4025  | 0.2931  | 0.5700  | 0.2811  | 0.2008  | 0.5061  | 0.3175  |
| 1647 | S;S-24 26_C Q92466 | DNA damage-bin DDB2           | 1.9419  | 1.8015  | 1.5432  | 1.8253  | 1.7769  | 1.6139  | 2.2782  | 1.8647  | 1.3485  | 1.2336  |
| 1648 | S;S-24 27_C Q15435 | Protein phospho PPP1R7 SDS    | 0.8725  | 1.1089  | 0.9422  | 1.0976  | 0.7991  | 0.7124  | 1.2287  | 0.9407  | 0.7182  | 0.6322  |
| 1649 | S;S-248 253 Q9Y2W1 | Thyroid hormon THRAP3 BCL     | 0.2796  | 0.3140  | 0.3270  | 0.3231  | 0.5313  | 0.4976  | 0.6354  | 0.4848  | 0.3301  | 0.4402  |
| 1650 | S;S-249 252 P0C1Z6 | TCF3 fusion part TFPT INO80F  | -3.2309 | -3.3818 | -4.4284 | -3.8562 | -4.8064 | -5.1145 | -3.8509 | -4.8826 | -4.1378 | -3.7383 |
| 1651 | S;S-251 253 O75494 | Serine/arginine-r SRSF10 FUSI | 0.8979  | 1.3502  | 0.9148  | 1.0821  | 1.1013  | 0.4939  | 1.2843  | 0.7403  | 1.1558  | 1.3537  |
| 1652 | S;S-253 256 O75494 | Serine/arginine-r SRSF10 FUSI | 1.4670  | 1.6848  | 1.1025  | 1.1936  | 1.3656  | 0.8991  | 1.5199  | 1.3498  | 1.1628  | 1.0537  |
| 1653 | S;S-255 259 P17535 | Transcription fac JUND        | -0.1916 | -0.3230 | -0.1577 | 0.0224  | -0.0956 | 0.1946  | -0.0489 | 0.2172  | -0.6323 | -0.3493 |
| 1654 | S;S-255 261 P08238 | Heat shock prote HSP90AB1 H   | 1.0953  | 1.5335  | 1.2285  | 1.1292  | 1.3728  | 1.1550  | 1.6043  | 1.1597  | 1.2203  | 1.2862  |
| 1655 | S;S-258 260 Q86VR2 | Reticulophagy re RETREG3 FA   | -0.2077 | -0.2602 | -0.3330 | -0.6384 | -0.8357 | -0.7569 | -0.6338 | -0.7534 | -0.9302 | -0.8874 |
| 1656 | S;S-258 261 Q13422 | DNA-binding pro IKZF1 IK1 IK/ | -0.6516 | -0.6163 | -1.0447 | -0.8118 | -0.9627 | -0.8747 | -0.7361 | -0.9818 | -0.8296 | -0.7318 |
| 1657 | S;S-263 265 Q9NPI1 | Bromodomain-cc BRD7 BP75 C    | 0.1079  | 0.2031  | 0.2885  | 0.3643  | 0.3404  | 0.2518  | 0.2768  | 0.1188  | 0.6663  | 0.4240  |
| 1658 | S;S-266 271 Q6NY19 | KN motif and anl KANK3 ANKF   | -0.0145 | 0.1392  | 0.1566  | 0.3971  | 0.0083  | -0.1356 | 0.2077  | -0.0419 | -0.0598 | 0.0898  |
| 1659 | S;S-27 31_C O00418 | Eukaryotic elong EEF2K        | -0.3735 | -0.4302 | -0.5006 | -0.5814 | -0.7069 | -0.4956 | -1.5029 | -1.3988 | -0.3223 | -0.2479 |
| 1660 | S;S-2702 27 Q9UQ35 | Serine/arginine r SRRM2 KIAA  | 1.0550  | 1.1949  | 0.5127  | 0.8243  | 0.9009  | 0.5128  | 1.1706  | 0.8187  | 0.6298  | 0.8624  |
| 1661 | S;S-273 275 O75475 | PC4 and SFRS1-ir PSIP1 DFS70  | -0.4254 | -0.3894 | -0.3339 | -0.1576 | -0.1320 | -0.1604 | -0.3060 | -0.1428 | -0.2119 | -0.2070 |
| 1662 | S;S-274 280 Q6KC79 | Nipped-B-like pr NIPBL IDN3 : | -0.2140 | -0.2119 | -0.0986 | -0.0053 | -0.1421 | -0.0546 | -0.2628 | -0.1378 | -0.1638 | -0.2237 |
| 1663 | S;S-276 278 Q8N5A5 | Zinc finger CCCH-ZGPAT GPAT   | -2.1973 | -2.6894 | -2.3042 | -2.8822 | -2.4640 | -2.2852 | -2.3628 | -2.8826 | -2.3271 | -2.5914 |
| 1664 | S;S-277 279 Q13428 | Treacle protein ( TCOF1       | -1.0000 | -1.2815 | -1.0974 | -0.7597 | -0.9772 | -1.2179 | -1.3330 | -0.7978 | -1.5759 | -1.1419 |
| 1665 | S;S-279 281 Q9UQ35 | Serine/arginine r SRRM2 KIAA  | -2.1011 | -2.2081 | -2.0708 | -1.4688 | -1.1462 | -1.5040 | -1.0302 | -1.6978 | -1.9806 | -2.1764 |
| 1666 | S;S-28 34_P P19338 | Nucleolin (Protei NCL         | -0.5420 | -0.5847 | 0.1263  | -0.7540 | 0.0156  | -0.5163 | -0.0156 | -0.2416 | 0.2954  | 0.1135  |
| 1667 | S;S-281 287 Q2YD98 | UV-stimulated sc UVSSA KIAA   | -0.6318 | -0.6770 | -0.6098 | -0.6164 | -0.6683 | -0.4461 | -0.8276 | -0.9025 | -0.8296 | -0.9936 |
| 1668 | S;S-282 286 Q96JM3 | Chromosome ali CHAMP1 C1      | -0.3805 | -0.1640 | -0.5305 | -0.6636 | -0.3802 | -0.5124 | -0.4120 | -0.6088 | -0.2401 | -0.3558 |
| 1669 | S;S-29 31_C Q9BVJ6 | U3 small nucleol UTP14A SDC   | 0.6171  | 0.9139  | 0.2677  | 0.2672  | 0.5309  | 0.4434  | 0.5181  | 0.2620  | 0.4680  | 0.4421  |
| 1670 | S;S-29 34_C Q9HCD5 | Nuclear receptor NCOA5 KIAA   | 0.9325  | 0.9766  | 1.3085  | 1.3560  | 1.5032  | 1.1984  | 1.4998  | 1.3605  | 1.2220  | 1.4707  |
| 1671 | S;S-292 294 Q13523 | Serine/threonine PRPF4B KIA/  | -1.2309 | -1.4110 | -2.5035 | -1.8757 | -2.2919 | -2.6834 | -1.9229 | -2.0689 | -2.4497 | -2.6387 |
| 1672 | S;S-295 297 Q9UQ35 | Serine/arginine r SRRM2 KIAA  | 0.8843  | 1.0436  | 0.7658  | 0.7815  | 0.6728  | 0.8677  | 0.8481  | 0.7458  | 0.7476  | 0.7274  |
| 1673 | S;S-296 298 O00499 | Myc box-depend BIN1 AMPHI     | 0.4774  | 0.4139  | -0.1337 | -0.0711 | 0.0391  | 0.0583  | 0.4235  | 0.1397  | 0.0372  | -0.2102 |
| 1674 | S;S-299 307 Q14676 | Mediator of DNA MDC1 KIAAC    | -0.4753 | -0.4834 | -0.1698 | -0.4396 | -0.2065 | -0.3596 | -0.4000 | -0.5450 | -0.4129 | -0.2312 |
| 1675 | S;S-30 32_C Q7L4I2 | Arginine/serine-r RSRC2       | 1.4532  | 0.8428  | 1.6033  | 1.8263  | 1.9796  | 1.8579  | 1.8657  | 2.0329  | 1.5152  | 1.5850  |
| 1676 | S;S-30 32_C Q9Y2V2 | Calcium-regulate CARHSP1      | 0.6578  | 0.6892  | -0.1360 | -0.2499 | -0.0345 | -0.1973 | -0.1078 | -0.4314 | -0.1094 | -0.1376 |
| 1677 | S;S-301 303 Q13247 | Serine/arginine-r SRSF6 SFRS6 | -0.2471 | 0.0355  | -0.1982 | -0.0099 | 0.2868  | -0.0704 | -0.0382 | -0.0491 | 0.1175  | 0.2318  |

|      |                    |                                |         |         |         |         |         |         |         |         |         |         |
|------|--------------------|--------------------------------|---------|---------|---------|---------|---------|---------|---------|---------|---------|---------|
| 1678 | S;S-301 303 Q9NYV4 | Cyclin-dependen CDK12 CRK7     | 0.5716  | 0.4378  | 0.2299  | 0.6841  | 0.7525  | 0.3154  | 0.7450  | 0.6409  | 0.1471  | 0.1675  |
| 1679 | S;S-302 303 Q13435 | Splicing factor 3E SF3B2 SAP14 | -0.8475 | -0.8508 | -0.3847 | -0.8309 | -0.6859 | -0.8933 | -0.9183 | -0.9173 | -0.4807 | -0.4763 |
| 1680 | S;S-302 304 Q8TAQ2 | SWI/SNF comple SMARCC2 BAF     | 1.6800  | 1.6135  | 1.3030  | 1.6038  | 1.5859  | 1.3670  | 1.4128  | 1.5134  | 1.4080  | 1.5223  |
| 1681 | S;S-304 307 P05388 | 60S acidic riboso RPLP0        | -3.1325 | -2.6611 | -4.0190 | -4.7567 | -4.4845 | -3.3827 | -3.6419 | -4.7952 | -4.0927 | -3.8638 |
| 1682 | S;S-306 307 P35659 | Protein DEK DEK                | -0.4114 | -0.2721 | -0.6002 | -0.5037 | -0.7220 | -0.5977 | -0.5233 | -0.7354 | -0.7120 | -0.3674 |
| 1683 | S;S-309 311 Q96SB4 | SRSF protein kinã SRPK1        | 1.3731  | 1.3930  | 1.6772  | 1.4760  | 1.6808  | 1.6380  | 1.6747  | 1.7399  | 1.6688  | 1.1992  |
| 1684 | S;S-312 314 Q13769 | THO complex sub THOC5 C22c     | 0.7089  | 0.6809  | 0.9258  | 0.8185  | 0.5908  | 0.7808  | 0.5834  | 0.7622  | 0.9921  | 0.8778  |
| 1685 | S;S-312 318 O43586 | Proline-serine-th PSTPIP1 CD2  | 0.4499  | 0.3735  | 0.6815  | 0.3863  | 0.2704  | 0.5760  | 0.5627  | 0.4280  | -0.0968 | -0.2267 |
| 1686 | S;S-313 321 Q8TF01 | Arginine/serine-r PNISR C6orf  | -0.1186 | 0.0022  | 0.0280  | -0.3991 | -0.0176 | -0.2059 | -0.2879 | -0.1770 | 0.3607  | 0.6541  |
| 1687 | S;S-314 316 Q13247 | Serine/arginine-r SRSF6 SFRS6  | 0.2546  | -0.0044 | 0.7841  | 1.3002  | 1.2434  | 1.0309  | 1.0635  | 1.1524  | 0.8969  | 1.0179  |
| 1688 | S;S-320 321 Q9NY61 | Protein AATF (Aã AATF CHE1 L   | 0.9876  | 1.1271  | 0.9052  | 1.2606  | 0.7712  | 1.0814  | 0.9243  | 0.8971  | 1.0344  | 0.8919  |
| 1689 | S;S-322 323 Q9UQ35 | Serine/arginine r SRRM2 KIAA   | 1.0081  | 1.3305  | 1.4288  | 1.4982  | 1.2916  | 1.6356  | 1.2838  | 1.4633  | 1.5494  | 1.6050  |
| 1690 | S;S-328 330 P32249 | G-protein couple GPR183 EBI2   | 0.7835  | 0.8468  | 0.5246  | 0.3536  | -0.0050 | -0.0510 | 0.0069  | -0.1756 | -0.5040 | -0.4781 |
| 1691 | S;S-328 330 Q92922 | SWI/SNF comple SMARCC1 BAF     | 0.7652  | 0.9230  | 0.5630  | 0.3455  | 0.5826  | 0.3769  | 0.5115  | 0.3531  | 0.7401  | 0.7923  |
| 1692 | S;S-328 333 P32249 | G-protein couple GPR183 EBI2   | -0.5959 | -0.5532 | 0.1224  | -0.5841 | -0.0213 | -0.6551 | -0.1148 | -0.8166 | -0.6700 | -0.7297 |
| 1693 | S;S-33 37_C Q9Y4F9 | Rho family-interã RIPOR2 C6orf | -0.4956 | -0.6437 | -0.7773 | -0.9736 | -0.8859 | -0.3238 | -0.4774 | -0.5540 | -0.4967 | -0.8154 |
| 1694 | S;S-335 336 Q8IY81 | pre-rRNA 2'-O-riã FTSJ3 SB92   | 0.6918  | 0.8979  | 0.2037  | 0.5689  | 0.3095  | 0.7030  | 0.1689  | 0.1928  | 0.4577  | 0.1846  |
| 1695 | S;S-343 347 O75676 | Ribosomal protei RPS6KA4 M5    | -0.6890 | -0.7056 | -1.2509 | -1.1518 | -1.4389 | -1.6787 | -0.8721 | -1.0403 | -1.7270 | -1.6918 |
| 1696 | S;S-35 39_C Q9Y4H4 | G-protein-signali GPSM3 AGS3   | 0.6486  | 0.6246  | 0.0229  | 0.6459  | 0.5436  | 0.3601  | 0.8824  | 0.6976  | -0.2172 | -0.0418 |
| 1697 | S;S-351 353 Q9UQ35 | Serine/arginine r SRRM2 KIAA   | 0.1911  | 0.0033  | -0.1499 | 0.3985  | 0.2395  | -0.3071 | 0.1975  | -0.1961 | -0.2901 | 0.0934  |
| 1698 | S;S-351 355 P16150 | Leukosialin (GPL: SPN CD43     | 0.6635  | 0.7842  | 0.7968  | 0.7049  | 0.8156  | 1.2692  | 0.9592  | 1.3759  | 0.7783  | 0.4525  |
| 1699 | S;S-354 356 Q13523 | Serine/threonine PRPF4B KIAA   | -1.2543 | -1.2627 | 0.8517  | 0.2976  | 0.4465  | 0.3763  | 0.7661  | 0.7222  | 0.6911  | 0.8961  |
| 1700 | S;S-364 365 Q9BZD3 | Putative GRINL1ã GCOM2 GRIN    | 0.4722  | 0.4362  | 0.4550  | 0.5039  | 0.2673  | 0.3990  | 0.3149  | 0.2454  | 0.5521  | 0.2259  |
| 1701 | S;S-365 368 Q9NQZ2 | Something about UTP3 CRLZ1     | -0.3782 | -0.5147 | 0.0352  | -0.1617 | 0.2473  | 0.3819  | 0.2133  | 0.2466  | 0.1669  | 0.0898  |
| 1702 | S;S-366 368 Q13523 | Serine/threonine PRPF4B KIAA   | 0.0162  | -0.1827 | -0.1983 | -0.0599 | -0.0863 | -0.5146 | 0.0193  | -0.2716 | -0.4060 | -0.0207 |
| 1703 | S;S-367 369 Q12874 | Splicing factor 3ã SF3A3 SAP6ã | -0.3296 | -0.3434 | -0.4771 | -0.3349 | -0.1401 | 0.0309  | -0.3812 | -0.1892 | -0.0196 | -0.3476 |
| 1704 | S;S-37 42_P P16402 | Histone H1.3 (Hiã H1-3 H1F3 H  | -0.4755 | -0.3534 | -0.2591 | -0.3454 | -0.1021 | 0.1219  | -0.1173 | -0.2037 | -0.9877 | -0.7239 |
| 1705 | S;S-370 371 Q9UEW8 | STE20/SPS1-relat STK39 SPAK    | -0.6773 | -0.5761 | -0.5260 | -0.4180 | -0.7250 | -0.4240 | -0.2457 | -0.3908 | -0.7270 | -0.7490 |
| 1706 | S;S-378 379 Q8N554 | Zinc finger protei ZNF276 CEN  | 0.6918  | 0.8703  | 0.8811  | 0.8233  | 0.7914  | 0.9918  | 0.7160  | 0.7321  | 0.7414  | 0.8687  |
| 1707 | S;S-379 382 Q8N554 | Zinc finger protei ZNF276 CEN  | 0.7829  | 0.9481  | 0.8748  | 0.9082  | 0.9608  | 1.0052  | 0.8929  | 0.9207  | 0.9328  | 0.6235  |
| 1708 | S;S-380 382 Q9BVS4 | Serine/threonine RIOK2 RIO2    | -0.2630 | -0.4243 | -0.0807 | -0.2415 | -0.1001 | -0.2441 | -0.3265 | -0.4606 | -0.2822 | -0.1895 |
| 1709 | S;S-382 384 P28715 | DNA repair protei ERCC5 ERCCV  | -1.1484 | -0.8300 | -0.9958 | -0.9020 | -1.1585 | -1.0301 | -1.1605 | -1.4150 | -1.0789 | -1.0538 |
| 1710 | S;S-382 386 Q96JM3 | Chromosome aliã CHAMP1 C11     | 0.2224  | 0.2079  | 0.5009  | 0.5051  | 0.3360  | 0.4683  | 0.1930  | 0.2620  | 0.2676  | 0.3891  |
| 1711 | S;S-383 384 Q15424 | Scaffold attachm SAFB HAP HI   | 0.8356  | 0.6838  | 0.5289  | 0.4307  | 0.7627  | 0.6031  | 0.8800  | 0.8327  | 0.6496  | 0.8703  |
| 1712 | S;S-389 390 P55010 | Eukaryotic transl EIF5         | -0.5213 | -0.3646 | -0.1189 | -0.2268 | -0.2896 | -0.1736 | -0.1722 | -0.2846 | -0.0249 | -0.3184 |
| 1713 | S;S-389 393 Q8IYB3 | Serine/arginine r SRRM1 SRM    | 0.9522  | 1.1164  | 0.0270  | 0.2099  | 0.1643  | -0.0285 | 0.2939  | 0.1202  | 0.0586  | 0.2564  |
| 1714 | S;S-391 393 Q8IYB3 | Serine/arginine r SRRM1 SRM    | 1.7797  | 1.5495  | 1.3017  | 1.1558  | 1.5951  | 1.3728  | 1.3397  | 1.2614  | 1.4746  | 1.4202  |
| 1715 | S;S-392 394 Q86X95 | Corepressor inte CIR1 CIR      | 0.9191  | 0.6741  | 0.9948  | 1.1827  | 1.5436  | 1.1636  | 1.3206  | 1.3462  | 0.9314  | 1.0109  |
| 1716 | S;S-398 400 Q96ST2 | Protein IWS1 hor IWS1 IWS1L    | 0.6242  | 0.5555  | 0.5632  | 0.7553  | 0.3258  | 0.5978  | 0.4215  | 0.6777  | 0.4251  | 0.4383  |

|      |                    |                                 |         |         |         |         |         |         |         |         |         |         |
|------|--------------------|---------------------------------|---------|---------|---------|---------|---------|---------|---------|---------|---------|---------|
| 1717 | S;S-409 410 P23497 | Nuclear autoanti SP100          | -0.2761 | -0.2222 | 0.0000  | -0.1459 | -0.2762 | -0.2318 | -0.3039 | -0.2939 | -0.0157 | 0.3196  |
| 1718 | S;S-41 42_P P19338 | Nucleolin (Protei NCL           | -0.6123 | -0.5505 | -0.9840 | -0.6840 | -0.9894 | -0.4675 | -1.2176 | -0.6650 | -0.6029 | -0.7088 |
| 1719 | S;S-413 415 Q13427 | Peptidyl-prolyl ci PPIG         | 0.5838  | 0.6174  | 0.9580  | 1.2282  | 0.8821  | 1.3385  | 0.8561  | 1.2753  | 1.0097  | 0.8068  |
| 1720 | S;S-416 420 P85037 | Forkhead box pri FOXK1 MNF      | 0.2378  | 0.3319  | -0.0730 | -0.1090 | -0.6279 | 0.1469  | 0.4293  | 0.4074  | 0.2469  | 0.3812  |
| 1721 | S;S-421 423 Q13547 | Histone deacetyl HDAC1 RPD:     | 0.4069  | 0.3467  | 0.6912  | 0.8243  | 0.5981  | 0.6528  | 0.5654  | 0.6092  | 0.7752  | 0.4795  |
| 1722 | S;S-422 424 Q92769 | Histone deacetyl HDAC2          | -0.2394 | 0.1210  | 0.3173  | 0.2979  | 0.2175  | 0.2380  | -0.0117 | 0.0788  | 0.3918  | 0.3989  |
| 1723 | S;S-422 424 Q9NTZ6 | RNA-binding pro RBM12 KIAA      | 0.4784  | 0.6441  | 0.1907  | 0.7180  | 0.2780  | 0.4683  | 0.3655  | -0.0494 | 0.0187  | -0.0863 |
| 1724 | S;S-429 430 Q03468 | DNA excision rep ERCC6 CSB      | -0.3183 | -0.2158 | 0.1272  | -0.0269 | 0.1676  | 0.4401  | 0.0820  | 0.1342  | -0.0706 | -0.0142 |
| 1725 | S;S-429 431 Q8IYB3 | Serine/arginine r SRRM1 SRM     | 1.3696  | 1.3244  | 0.9853  | 1.4560  | 1.3820  | 0.9166  | 1.4326  | 1.2259  | 1.0901  | 1.0874  |
| 1726 | S;S-431 437 Q13523 | Serine/threonine PRPF4B KIA/    | 1.3392  | 1.3441  | 1.2936  | 1.1598  | 1.0639  | 0.8895  | 1.1362  | 1.0053  | 1.2298  | 1.1908  |
| 1727 | S;S-435 436 Q13435 | Splicing factor 3E SF3B2 SAP1/  | 0.3052  | 0.1915  | 0.1557  | 0.1390  | 0.3932  | 0.1643  | 0.0308  | 0.2415  | 0.4299  | 0.2904  |
| 1728 | S;S-44 47_C O00178 | GTP-binding prot GTPBP1         | -0.5895 | -0.5207 | -0.6530 | -0.6609 | -0.8198 | -0.5196 | -0.7579 | -0.8660 | -0.8561 | -0.8167 |
| 1729 | S;S-442 445 Q13422 | DNA-binding pro IKZF1 IK1 IK/   | -0.7214 | -1.5597 | 0.2028  | 0.0106  | 0.1260  | 0.5590  | 0.3540  | 0.6468  | 0.1990  | -0.0672 |
| 1730 | S;S-443 444 Q9BQF6 | Sentrin-specific p SENP7 KIAA:  | 0.0567  | 0.1281  | 0.1854  | -0.1697 | -0.0922 | 0.1157  | 0.2704  | 0.0031  | 0.1865  | 0.3713  |
| 1731 | S;S-453 455 P29374 | AT-rich interacti ARID4A RBB    | 0.7391  | 0.8728  | 0.1706  | 0.3822  | 0.2704  | 0.3922  | 0.4860  | 0.2823  | 0.0834  | 0.2093  |
| 1732 | S;S-454 456 Q9UQ35 | Serine/arginine r SRRM2 KIAA    | 2.3335  | 2.1913  | 1.7974  | 2.4146  | 2.4432  | 1.7988  | 2.5994  | 2.0932  | 1.7657  | 2.0157  |
| 1733 | S;S-455 457 Q7Z5L9 | Interferon regula IRF2BP2       | -0.9678 | -0.6984 | -0.7542 | -0.4987 | -0.4691 | -0.5775 | -0.4684 | -0.4480 | -0.4515 | -0.4777 |
| 1734 | S;S-459 461 Q7Z5K2 | Wings apart-like WAPL FOE K     | -0.3966 | -0.4311 | -0.3977 | -0.4160 | -0.4845 | -0.3951 | -0.5441 | -0.5809 | -0.3475 | -0.2608 |
| 1735 | S;S-460 462 P55201 | Peregrin (Bromo BRPF1 BR14/     | 0.8476  | 0.9788  | 0.9580  | 0.8785  | 0.9088  | 1.1867  | 0.8263  | 0.8571  | 1.0232  | 1.1663  |
| 1736 | S;S-463 465 Q8IYB3 | Serine/arginine r SRRM1 SRM     | 0.3299  | 0.3989  | 0.6181  | 1.1606  | 1.0444  | 1.0511  | 0.7581  | 0.9351  | 0.5732  | 0.6277  |
| 1737 | S;S-472 478 Q76N32 | Centrosomal pro CEP68 KIAA(     | -0.0972 | -0.2145 | -0.2201 | -0.0880 | -0.3970 | -0.2961 | -0.3728 | -0.3052 | -0.0530 | -0.2072 |
| 1738 | S;S-4752 47 Q9NU22 | Midasin (Dynein- MDN1 KIAA(     | 0.8476  | 0.9133  | 0.1510  | 0.0282  | 0.4947  | 0.2506  | 0.3702  | 0.1258  | 0.2114  | 0.1209  |
| 1739 | S;S-479 480 Q96KC8 | DnaJ homolog su DNAJC1 HTJ:     | 0.2621  | 0.1402  | 0.2573  | 0.0712  | -0.1421 | -0.1323 | -0.1576 | 0.0510  | -0.4766 | -0.8708 |
| 1740 | S;S-479 480 Q96RK0 | Protein capicua t CIC KIAA030   | 0.2131  | 0.3025  | 0.0146  | 0.2892  | 0.0674  | 0.0207  | -0.0289 | -0.1650 | 0.1990  | 0.2756  |
| 1741 | S;S-483 484 P42768 | Wiskott-Aldrich s WAS IMD2      | -0.3433 | -0.6752 | -0.4074 | -0.5498 | -0.8522 | -0.4220 | -0.6541 | -0.5207 | -0.7954 | -0.5683 |
| 1742 | S;S-483 485 O75925 | E3 SUMO-proteir PIAS1 DDXBI     | -0.4603 | -0.7797 | -0.0479 | -0.0730 | 0.1478  | 0.1102  | -0.2033 | 0.1272  | -0.0436 | -0.1068 |
| 1743 | S;S-483 492 Q96Q42 | Alsin (Amyotropl ALS2 ALS2CF    | -1.1524 | -1.1116 | -1.0599 | -1.0342 | -0.8324 | -0.7246 | -1.3200 | -1.1013 | -1.1493 | -0.8268 |
| 1744 | S;S-484 486 Q9UQ35 | Serine/arginine r SRRM2 KIAA    | 1.3807  | 1.4027  | 1.2458  | 2.1478  | 2.2481  | 1.4602  | 2.2741  | 1.8814  | 1.2616  | 1.4698  |
| 1745 | S;S-485 494 O60832 | H/ACA ribonucle DKC1 NOLA/      | 1.0063  | 0.9567  | 1.3681  | 1.3712  | 1.4590  | 1.4597  | 1.3586  | 1.4511  | 1.2627  | 1.2104  |
| 1746 | S;S-487 491 O75038 | 1-phosphatidylin PLCH2 KIAA(    | 0.4591  | 0.6131  | 0.7188  | 0.7006  | 0.0174  | 0.1590  | 0.2200  | 0.3365  | 0.2730  | 0.0568  |
| 1747 | S;S-489 494 O94913 | Pre-mRNA cleavz PCF11 KIAAC     | -0.7394 | -0.6403 | -0.5396 | -0.5472 | -0.3055 | -0.3257 | -0.3249 | -0.4314 | -0.5040 | -0.6650 |
| 1748 | S;S-496 497 Q9C0K0 | B-cell lymphoma BCL11B CTIP     | -1.2871 | -1.3476 | 0.3257  | 0.1227  | 0.0192  | 0.9330  | -0.4648 | 0.2428  | 0.9941  | 0.6442  |
| 1749 | S;S-498 499 Q8TCJ2 | Dolichyl-diphosp STT3B SIMP     | 2.3179  | 1.8369  | 0.7022  | 0.8423  | -0.5027 | 0.5948  | 0.8503  | 0.3389  | -0.1165 | -0.7818 |
| 1750 | S;S-498 500 Q9H7N4 | Splicing factor, ai SCAF1 SFRS1 | 0.3081  | 0.6022  | 0.2998  | 0.1687  | 0.2380  | 0.2490  | 0.2764  | 0.2896  | 0.3265  | 0.2861  |
| 1751 | S;S-499 501 Q9H0D6 | 5'-3' exoribonucl XRN2          | 0.3287  | 0.4055  | 0.1358  | 0.3008  | -0.0727 | 0.2190  | 0.1596  | 0.1046  | 0.0846  | 0.2862  |
| 1752 | S;S-502 514 Q9Y2X3 | Nucleolar proteir NOP58 NOL!    | 0.8365  | 1.0328  | 1.2245  | 1.0472  | 1.0710  | 1.4352  | 1.0875  | 1.1167  | 0.9644  | 0.8345  |
| 1753 | S;S-504 505 P29590 | Protein PML (Pro PML MYL PP     | 1.0593  | 1.1808  | 1.3165  | 1.2972  | 1.0867  | 1.0697  | 1.1964  | 1.1692  | 1.3393  | 1.2048  |
| 1754 | S;S-508 510 Q9UQ35 | Serine/arginine r SRRM2 KIAA    | -4.3183 | -3.2391 | -3.5955 | -3.2542 | -2.6949 | -3.3673 | -2.6998 | -2.9638 | -3.4285 | -3.5012 |
| 1755 | S;S-509 511 O94913 | Pre-mRNA cleavz PCF11 KIAAC     | 0.7975  | 0.7151  | 0.9242  | 0.7575  | 0.7998  | 1.0569  | 0.8190  | 1.1046  | 0.8708  | 0.9335  |



|      |                    |                                             |         |         |         |         |         |         |         |         |         |         |
|------|--------------------|---------------------------------------------|---------|---------|---------|---------|---------|---------|---------|---------|---------|---------|
| 1756 | S;S-509 511 Q96B97 | SH3 domain-cont SH3KBP1 CIP                 | -0.4018 | -0.2313 | -0.2128 | -0.3851 | -0.2695 | -0.2336 | -0.3363 | -0.3888 | -0.5509 | -0.3152 |
| 1757 | S;S-518 527 P29590 | Protein PML (Pro PML MYL PP                 | 0.8872  | 0.9033  | 0.2824  | 0.5867  | 0.5810  | 0.3531  | 0.5697  | 0.3865  | 0.6061  | 0.6590  |
| 1758 | S;S-519 520 O00567 | Nucleolar protein NOP56 NOL1                | 0.2084  | 0.0231  | -0.1852 | -0.5164 | -0.2806 | -0.0255 | -0.1346 | -0.1029 | -0.3803 | -0.0794 |
| 1759 | S;S-52 53_P P55081 | Microfibrillar-associated MFAP1             | 0.4774  | 0.1925  | 0.2546  | -0.0711 | 0.1887  | 0.4280  | 0.1585  | 0.4694  | 0.4124  | 0.5294  |
| 1760 | S;S-52 54_C Q8TAD8 | Smad nuclear-interacting SNIP1              | -0.1364 | 0.1710  | -0.3251 | -0.5087 | 0.1560  | -0.2708 | -0.0328 | -0.3689 | -0.2524 | 0.0886  |
| 1761 | S;S-527 529 Q5VTL8 | Pre-mRNA-splicing PRPF38B                   | 0.3626  | -0.2456 | 0.3072  | 0.9530  | 0.8364  | 0.4390  | 1.0219  | 0.6967  | 0.1305  | 0.3812  |
| 1762 | S;S-53 55_C Q9NVC6 | Mediator of RNA polymerase II MED17 ARCT    | -3.5317 | -3.5663 | 0.1301  | 0.0541  | 0.9039  | 0.6612  | -3.9278 | -2.9878 | -4.0706 | -3.5307 |
| 1763 | S;S-53 56_C Q9P2R6 | Arginine-glutamine-rich RERE ARG1           | -0.1050 | -0.1164 | 0.3990  | 0.4836  | -0.0326 | 0.2304  | 0.1303  | 0.2376  | 0.4830  | 0.3299  |
| 1764 | S;S-532 534 Q86VM9 | Zinc finger protein CCCH ZC3H18 NHR         | 1.1525  | 1.2141  | 1.3025  | 1.3244  | 1.3309  | 1.4613  | 1.5249  | 1.6920  | 1.0410  | 0.7459  |
| 1765 | S;S-533 539 Q9H6Z4 | Ran-binding protein RANBP3                  | 0.2964  | 0.2560  | 0.0962  | -0.0287 | -0.1259 | 0.0382  | -0.0939 | 0.0137  | -0.0118 | -0.0273 |
| 1766 | S;S-54 58_C Q9H1E3 | Nuclear ubiquitin-protein ligase NUCKS1 NUC | 0.9587  | 0.7759  | 1.0239  | 1.8338  | 1.6341  | 1.4130  | 1.5636  | 1.6152  | 0.8282  | 1.1467  |
| 1767 | S;S-544 546 Q13427 | Peptidyl-prolyl isomerase PPIG              | 2.0528  | 1.9033  | 2.1994  | 2.5373  | 2.5184  | 2.3288  | 2.4027  | 2.3935  | 2.1669  | 2.1543  |
| 1768 | S;S-547 550 Q9H1C4 | Protein unc-93 homolog UNC93B1 UPR          | 0.0688  | 0.0350  | 0.0665  | -0.0397 | -0.6742 | -0.6158 | -0.5824 | -0.5789 | -0.7292 | -0.5779 |
| 1769 | S;S-549 551 Q8IYB3 | Serine/arginine-rich SRRM1 SRM              | 0.2636  | 0.4484  | 0.4124  | 0.4515  | 0.5461  | 0.2481  | 0.3377  | 0.4572  | 0.2080  | 0.5612  |
| 1770 | S;S-557 558 Q9Y5B6 | PAX3- and PAX7-related PAXBP1 C21           | -0.1994 | -0.3547 | -0.3475 | -0.1878 | -0.6654 | -0.1956 | -0.2959 | -0.1496 | -0.3552 | -0.1662 |
| 1771 | S;S-558 560 Q14966 | Zinc finger protein ZNF638 NP2              | 0.6760  | 0.5080  | 0.4358  | 0.3364  | 0.4710  | 0.7647  | 0.6364  | 0.6122  | 0.5697  | 0.3832  |
| 1772 | S;S-560 562 Q8IYB3 | Serine/arginine-rich SRRM1 SRM              | -0.0551 | 0.2151  | 0.2534  | 0.2279  | 0.4552  | 0.2095  | 0.2786  | 0.2595  | 0.1976  | 0.3096  |
| 1773 | S;S-561 563 Q8TF01 | Arginine/serine-rich PNISR C6orf            | -0.2959 | -0.2196 | -0.3029 | 0.1975  | 0.4292  | -0.3963 | 0.1136  | -0.0031 | -0.3568 | -0.1619 |
| 1774 | S;S-569 570 O00567 | Nucleolar protein NOP56 NOL1                | 1.3731  | 1.2165  | 1.1725  | 1.0498  | 1.0867  | 1.2374  | 1.0491  | 1.1487  | 0.8793  | 0.3841  |
| 1775 | S;S-573 575 P21580 | Tumor necrosis factor TNFAIP3 OTI           | -0.2893 | 0.1422  | 0.1919  | 0.2130  | 0.4114  | 0.4302  | 0.0129  | 0.3653  | 0.1529  | -0.0930 |
| 1776 | S;S-576 578 O15014 | Zinc finger protein ZNF609 KIAA             | 1.7228  | 1.7951  | 1.1896  | 1.0930  | 1.1494  | 1.2643  | 1.2481  | 1.1604  | 1.6340  | 1.3881  |
| 1777 | S;S-576 580 Q8IZM8 | Zinc finger protein ZNF654                  | -0.7668 | -0.8046 | -0.7107 | -0.6551 | -0.8129 | -0.7222 | -0.7470 | -0.9343 | -0.6172 | -0.6070 |
| 1778 | S;S-58 61_C Q9H1E3 | Nuclear ubiquitin-protein ligase NUCKS1 NUC | 1.1175  | 1.0392  | 1.3055  | 2.2640  | 1.6633  | 1.6565  | 1.8091  | 1.8074  | 0.8860  | 1.0343  |
| 1779 | S;S-590 597 Q9H4E7 | Differentially expressed DEF6 IBP           | 0.8110  | 0.7557  | 1.8495  | 1.2130  | 1.5366  | 1.1570  | 1.5428  | 1.2415  | 1.2848  | 0.7165  |
| 1780 | S;S-60 63_C Q13442 | 28 kDa heat-shock and PDAP1 HASF            | 0.2289  | 0.1458  | 0.3378  | 0.2622  | 0.3996  | 0.3135  | 0.3520  | 0.3007  | 0.4675  | 0.3491  |
| 1781 | S;S-60 69_C Q7L2J0 | 7SK snRNA methyletransferase MEPCE BCDI     | 0.0843  | 0.0565  | 0.1780  | 0.3449  | 0.2380  | 0.3762  | 0.2110  | 0.4460  | 0.4007  | 0.4749  |
| 1782 | S;S-601 604 Q15424 | Scaffold attachment factor SAFB HAP1        | 1.0081  | 0.9855  | 1.0819  | 1.0779  | 1.3578  | 0.9677  | 1.7558  | 1.2428  | 0.9218  | 0.8438  |
| 1783 | S;S-602 603 Q96RT1 | Erbin (Densin-18) ERBIN ERBB2               | 0.7261  | 0.7131  | 0.8541  | 0.8142  | 0.7688  | 1.0704  | 0.7566  | 0.7977  | 0.6963  | 0.2596  |
| 1784 | S;S-61 63_C Q9NXX6 | Non-structural protein NSMCE4A C            | -0.8787 | -1.0715 | -1.1592 | -1.1919 | -1.1100 | -0.9823 | -1.1547 | -1.0403 | -0.9401 | -0.8382 |
| 1785 | S;S-612 614 Q9H7N4 | Splicing factor, arginine-rich SCAF1 SFRS1  | 0.2424  | 0.3459  | -0.0371 | 0.2297  | 0.1124  | -0.0407 | 0.4739  | 0.5352  | -0.2649 | -0.1807 |
| 1786 | S;S-618 619 Q9Y6X4 | Soluble lamin-associated FAM169A KIA        | -0.5904 | -0.5163 | -0.1499 | -0.1818 | -0.4240 | -0.2583 | -0.3897 | -0.2996 | 0.4434  | 0.4192  |
| 1787 | S;S-619 620 Q641Q2 | WASH complex subunit WASHC2A F              | -0.5768 | -0.6524 | -0.6454 | -0.8724 | -0.9772 | -0.7494 | -1.0981 | -0.7794 | -0.8529 | -0.7664 |
| 1788 | S;S-62 64_C O43159 | Ribosomal RNA-protein RRP8 KIAA0            | -0.2098 | -0.1176 | -0.5876 | -0.6192 | -0.6654 | -0.5709 | -0.6460 | -0.5295 | -0.5003 | -0.4180 |
| 1789 | S;S-626 628 Q8IYB3 | Serine/arginine-rich SRRM1 SRM              | -0.0364 | -0.6999 | 0.2011  | 0.3697  | 0.4880  | 0.0652  | 0.3175  | 0.2864  | 0.3582  | 0.6032  |
| 1790 | S;S-626 631 Q9Y2K2 | Serine/threonine kinase SIK3 KIAA09         | -0.5661 | -0.3434 | -0.6869 | -0.6978 | -0.6919 | -0.4441 | -0.7318 | -0.8770 | -1.0598 | -0.9581 |
| 1791 | S;S-627 631 Q6PKG0 | La-related protein LARP1 KIAA0              | 0.2379  | 0.0959  | 0.3611  | 0.4117  | 0.3085  | 0.5010  | 0.2311  | 0.2610  | 0.6098  | 0.6136  |
| 1792 | S;S-63 65_P P52701 | DNA mismatch repair MSH6 GTBP               | -0.8074 | -0.5695 | 1.1325  | 1.1398  | 0.9945  | 1.2241  | 1.0585  | 1.1131  | 1.0296  | 1.1936  |
| 1793 | S;S-636 638 Q8IYB3 | Serine/arginine-rich SRRM1 SRM              | -0.0200 | -0.0645 | 0.5425  | 0.4747  | 0.9796  | -0.2961 | 0.7612  | -0.1095 | 0.5351  | 0.4478  |
| 1794 | S;S-640 641 Q3YEC7 | Rab-like protein RABL6 C9orf                | 0.8161  | 0.9749  | 1.2299  | 1.3505  | 0.6542  | 1.3397  | 0.9110  | 1.2246  | 0.8399  | 0.6475  |

|      |                    |                                 |         |         |         |         |         |         |         |         |         |         |
|------|--------------------|---------------------------------|---------|---------|---------|---------|---------|---------|---------|---------|---------|---------|
| 1795 | S;S-643 646 Q86X29 | Lipolysis-stimulat LSR LISCH    | 0.8586  | 0.9799  | 0.8628  | 1.2137  | 0.8093  | 1.6125  | 0.9876  | 0.9101  | 0.9477  | 0.6067  |
| 1796 | S;S-650 653 Q9UKJ3 | G patch domain- GPATCH8 GF      | 0.3835  | 0.3380  | 0.5374  | 0.3849  | 0.5896  | 0.4467  | 0.4841  | 0.6380  | 0.6548  | 0.6293  |
| 1797 | S;S-653 655 Q8IYB3 | Serine/arginine r SRRM1 SRM     | 1.3654  | 0.9407  | 1.5064  | 1.9929  | 2.1469  | 1.8923  | 1.8739  | 1.9920  | 1.6440  | 1.6732  |
| 1798 | S;S-655 657 Q9UKV3 | Apoptotic chrom ACIN1 ACINI     | 1.2115  | 0.9389  | 0.8714  | 1.2613  | 1.1871  | 0.7664  | 1.2644  | 1.0122  | 0.9328  | 0.9994  |
| 1799 | S;S-659 663 Q15334 | Lethal(2) giant la LLGL1 DLG4   | -0.5161 | -0.7589 | -0.1223 | -0.4252 | -0.0083 | -0.8967 | 0.1124  | -0.3223 | -0.8113 | -0.9885 |
| 1800 | S;S-66 68_C Q9UJV9 | Probable ATP-de DDX41 ABS       | -0.1464 | 0.0361  | -0.0063 | 0.0264  | -0.1917 | 0.0697  | 0.0967  | 0.2180  | 0.0372  | -0.0917 |
| 1801 | S;S-67 74_C Q9BXP5 | Serrate RNA effe SRRT ARS2 A    | 0.9671  | 0.8824  | 1.0110  | 1.1349  | 1.0073  | 1.2171  | 1.0019  | 1.0000  | 1.0123  | 0.9288  |
| 1802 | S;S-670 674 Q96T37 | RNA-binding pro RBM15 OTT       | 0.0427  | 0.2232  | 0.0474  | 0.0980  | 0.0064  | 0.0796  | 0.0697  | 0.0107  | 0.0686  | 0.0242  |
| 1803 | S;S-672 673 Q9Y3T9 | Nucleolar compl NOC2L NIR       | -0.9055 | -0.7911 | -0.5275 | -0.8987 | -0.9735 | -0.6272 | -0.6809 | -0.8328 | -0.6742 | -0.4652 |
| 1804 | S;S-673 677 Q9UEY8 | Gamma-adducin ADD3 ADDL         | 0.1735  | 0.3363  | 0.4466  | 0.5324  | 0.4196  | 0.5590  | 0.6255  | 1.0265  | 0.1053  | 0.0934  |
| 1805 | S;S-678 680 Q9UKE5 | TRAF2 and NCK-i TNIK KIAA05     | 1.2794  | 1.1174  | 1.0223  | 1.1129  | 0.9302  | 0.9888  | 1.2612  | 1.1145  | 0.8997  | 0.7212  |
| 1806 | S;S-678 681 Q8N163 | Cell cycle and ap CCAR2 DBC1    | 0.2756  | 0.3034  | -0.9587 | -1.2842 | -0.6567 | -0.6272 | -0.5159 | -0.5517 | -0.5895 | -0.4546 |
| 1807 | S;S-683 685 Q8IYB3 | Serine/arginine r SRRM1 SRM     | -1.3319 | -1.2042 | -0.4208 | -0.3940 | -0.3359 | -0.5077 | -0.4638 | -0.3315 | -0.5221 | -0.1988 |
| 1808 | S;S-683 686 Q8TC05 | Nuclear protein I MDM1          | -0.1665 | -0.1752 | -0.3055 | -0.6083 | -0.0766 | -0.1307 | -0.1134 | -0.0293 | 0.0524  | 0.2193  |
| 1809 | S;S-688 689 P49959 | Double-strand br MRE11 HNG      | -0.4284 | -0.6231 | -0.2547 | -0.6551 | -0.4742 | -0.2888 | -0.3511 | -0.4130 | -0.2997 | -0.2043 |
| 1810 | S;S-710 718 Q8IXT5 | RNA-binding pro RBM12B          | 0.2239  | 0.5166  | 0.1519  | 0.2493  | 0.4086  | -0.0453 | 0.1964  | 0.0000  | 0.2348  | 0.5133  |
| 1811 | S;S-725 727 Q96T58 | Msx2-interacting SPEN KIAA09    | -0.1325 | 0.0995  | -0.2609 | -0.2103 | -0.0439 | -0.3294 | -0.2228 | -0.2921 | -0.2649 | -0.4078 |
| 1812 | S;S-729 731 P46100 | Transcriptional r ATRX RAD54    | 0.5120  | 0.2606  | 0.7707  | 0.3546  | 0.7081  | 0.4939  | 0.6456  | 0.6082  | 0.7422  | 0.5965  |
| 1813 | S;S-729 731 Q66K74 | Microtubule-assc MAP1S BPY2     | -0.4554 | -0.5100 | -0.3004 | -0.1128 | -0.0139 | -0.3257 | -0.3728 | -0.4273 | -0.4622 | -0.2804 |
| 1814 | S;S-736 738 P98175 | RNA-binding pro RBM10 DXS8      | 0.7797  | 0.9889  | -0.3422 | 0.1013  | 0.0355  | -0.3788 | 0.2992  | -0.0996 | -0.2758 | -0.0498 |
| 1815 | S;S-737 739 Q9UER7 | Death domain-as DAXX BING2      | 0.2393  | -0.0033 | 0.0585  | 0.1502  | -0.1917 | -0.0499 | -0.1092 | -0.0545 | 0.1692  | -0.1096 |
| 1816 | S;S-738 740 Q8IYB3 | Serine/arginine r SRRM1 SRM     | 1.3349  | 0.9273  | 2.0364  | 2.2679  | 2.2631  | 2.1500  | 2.1217  | 2.3170  | 1.8860  | 1.8428  |
| 1817 | S;S-738 743 Q8IYB3 | Serine/arginine r SRRM1 SRM     | 0.8794  | 0.7616  | 1.2651  | 1.3265  | 1.0910  | 1.1736  | 1.1821  | 1.2121  | 1.1553  | 1.2820  |
| 1818 | S;S-739 743 Q9Y6X9 | ATPase MORC2 ( MORC2 KIAA       | 0.8068  | 0.3615  | 0.9231  | 1.3159  | 1.6180  | 1.3722  | 1.5135  | 1.3647  | 1.0097  | 1.0412  |
| 1819 | S;S-74 76_C O60930 | Ribonuclease H1 RNASEH1 RN      | -0.8361 | -0.8538 | -0.7737 | -0.3259 | -0.7129 | -0.9078 | -0.3216 | -0.9758 | -0.9252 | -0.6670 |
| 1820 | S;S-743 751 Q08J23 | RNA cytosine C(5 NSUN2 SAKI     | -0.4905 | -0.5978 | -0.4005 | -0.5394 | -0.6742 | -0.4421 | -1.5707 | -1.6395 | -1.4181 | -1.4511 |
| 1821 | S;S-744 745 Q13427 | Peptidyl-prolyl ci PPIG         | 0.6590  | 0.8884  | 0.8023  | 0.9214  | 0.6005  | 0.8505  | 0.5271  | 0.9463  | 0.9856  | 0.9871  |
| 1822 | S;S-748 758 Q13627 | Dual specificity t DYRK1A DYR   | -0.4930 | -0.4865 | -0.4482 | -0.9255 | -0.3922 | -0.3313 | -0.4068 | -0.3090 | -0.2309 | -0.5779 |
| 1823 | S;S-77 83_P P10644 | cAMP-dependen PRKAR1A PK        | 1.2092  | 1.2899  | 1.0991  | 0.9603  | 1.0753  | 0.7211  | 0.9033  | 0.4382  | 0.9584  | 1.0568  |
| 1824 | S;S-778 780 Q9UQ35 | Serine/arginine r SRRM2 KIAA    | 0.6289  | 0.7083  | 1.1123  | 1.1178  | 1.1952  | 0.9646  | 1.0955  | 1.0628  | 1.1732  | 1.2607  |
| 1825 | S;S-779 782 Q8IWA0 | WD repeat-conta WDR75 UTP       | 0.3437  | 0.3237  | -0.3938 | -0.1511 | -0.3054 | -0.2404 | -0.3714 | -0.3657 | -0.2845 | -0.3519 |
| 1826 | S;S-78 80_P P13861 | cAMP-dependen PRKAR2A PK        | 0.0757  | -0.1009 | -0.0963 | 0.2130  | -0.0650 | -0.4727 | 0.2032  | -0.1361 | -0.2586 | -0.0260 |
| 1827 | S;S-781 782 O94880 | PHD finger prote PHF14 KIAA(    | 0.0480  | -0.3462 | -0.3502 | -0.8149 | -0.3238 | -0.2162 | -0.4034 | -0.3223 | 0.0586  | 0.1548  |
| 1828 | S;S-787 790 Q86YV0 | RAS protein activ RASAL3        | 0.8695  | 0.7305  | 1.4634  | 1.6448  | 1.2064  | 1.6149  | 1.8890  | 1.8453  | 1.0078  | 1.2899  |
| 1829 | S;S-79 81_C Q5VUA4 | Zinc finger protei ZNF318 HRII  | 0.2492  | 0.3173  | 0.3506  | 0.3968  | 0.2860  | 0.3027  | 0.3432  | 0.4057  | 0.4679  | 0.6556  |
| 1830 | S;S-797 802 Q8IYB3 | Serine/arginine r SRRM1 SRM     | 1.1245  | 1.1388  | 0.5228  | 0.8473  | 0.7326  | 0.7952  | 0.4964  | 0.8629  | 0.5281  | 0.4276  |
| 1831 | S;S-80 82_C Q15637 | Splicing factor 1 I SF1 ZFM1 ZM | 1.0036  | 1.0665  | -0.0787 | 0.1756  | -0.2458 | -0.0356 | -0.3495 | -0.1909 | 0.0285  | 0.4628  |
| 1832 | S;S-805 809 Q9BTC0 | Death-inducer ol DIDO1 C20o     | -0.8688 | -0.5794 | -0.7090 | -1.0636 | -0.9203 | -0.9218 | -0.8888 | -0.9638 | -0.7078 | -0.7148 |
| 1833 | S;S-807 808 Q9BZF1 | Oxysterol-bindin OSBPL8 KIAA    | 0.6544  | 0.6051  | 0.6458  | 0.3795  | 0.3081  | 0.4897  | 0.4607  | 0.4348  | 0.0956  | 0.3134  |

|      |                     |                                |         |         |         |         |         |         |         |         |         |         |
|------|---------------------|--------------------------------|---------|---------|---------|---------|---------|---------|---------|---------|---------|---------|
| 1834 | S;S-816 818 Q99590  | Protein SCAF11 ( SCAF11 CASI   | 0.9587  | 0.9273  | 1.3106  | 1.5641  | 1.6940  | 1.0483  | 1.8094  | 1.3096  | 0.8997  | 1.1919  |
| 1835 | S;S-826 828 Q14687  | Genetic suppress GSE1 KIAA0    | 0.5946  | 0.7655  | 0.2334  | 0.2950  | 0.1361  | -0.0561 | 0.0129  | -0.0231 | -0.0830 | -0.1519 |
| 1836 | S;S-8277 82 Q8NF91  | Nesprin-1 (Enapt SYNE1 C6orf   | -0.2015 | -0.3336 | -0.2597 | -0.2041 | -0.1938 | -0.1905 | -0.2033 | -0.3748 | -0.6618 | -0.6528 |
| 1837 | S;S-83 85_P P31323  | cAMP-dependen PRKAR2B          | -1.1808 | -1.2417 | -1.2116 | -1.2929 | -1.8324 | -1.9735 | -1.5746 | -1.3090 | -1.4930 | -1.3891 |
| 1838 | S;S-837 839 Q96FS4  | Signal-induced p SIPA1 SPA1    | 0.6053  | 0.7746  | 0.4649  | 0.3265  | 0.5473  | 0.4247  | 0.8532  | 0.6002  | 0.2837  | 0.3593  |
| 1839 | S;S-84 85_C O15541  | E3 ubiquitin-prot RNF113A RN   | -0.3041 | -0.2336 | -0.2515 | -0.3502 | -0.4194 | -0.3519 | -0.4856 | -0.5342 | -0.2127 | -0.2541 |
| 1840 | S;S-84 86_C Q14739  | Delta(14)-sterol i LBR         | 0.0036  | -0.0985 | -0.1042 | 0.3685  | 0.6623  | -0.4604 | 0.6929  | -0.1294 | -0.0899 | 0.0593  |
| 1841 | S;S-84 88_C Q13151  | Heterogeneous r HNRNPA0 H      | 0.5044  | 0.8734  | 0.2833  | 0.4213  | 0.6831  | 0.1603  | 0.9538  | 0.7549  | 0.1634  | 0.3522  |
| 1842 | S;S-849 850 P46100  | Transcriptional ri ATRX RAD54  | 1.3198  | 1.5853  | 1.1257  | 0.7575  | 0.8650  | 0.8205  | 0.8696  | 0.7907  | 1.1893  | 0.9159  |
| 1843 | S;S-85 87_C Q6UN15  | Pre-mRNA 3'-enc FIP1L1 FIP1 I  | -0.5265 | -0.3703 | -0.2299 | 0.2687  | -0.2874 | -0.2231 | -0.4276 | -0.4733 | 0.0000  | -0.1068 |
| 1844 | S;S-86 88_C Q9NXG2  | THUMP domain- THUMPD1          | 1.2809  | 1.3546  | 0.6497  | 0.7910  | 0.7301  | 0.8644  | 0.9829  | 0.8667  | 0.7738  | 0.5559  |
| 1845 | S;S-86 89_P P05114  | Non-histone chr- HMGN1 HM      | 0.9726  | 1.1062  | 0.4604  | 1.3733  | 1.0408  | 1.0037  | 1.2122  | 1.2061  | 0.6009  | 0.8417  |
| 1846 | S;S-860 861 Q6GYQ0  | Ral GTPase-activ RALGAPA1 C    | 1.6405  | 1.7596  | 0.9794  | 1.1112  | 1.1124  | 1.1280  | 1.2928  | 1.0795  | 0.9935  | 1.0703  |
| 1847 | S;S-862 865 Q726I6  | Rho GTPase-activ ARHGAP30      | -0.2783 | -0.3604 | -0.7791 | -0.7123 | -0.7904 | -0.7494 | -0.5122 | -0.7002 | -1.0625 | -0.9657 |
| 1848 | S;S-862 871 O14974  | Protein phosph- PPP1R12A N     | 0.6160  | 0.8794  | 0.3587  | 0.5483  | 0.1577  | 0.1143  | 0.0473  | 0.3771  | 0.0091  | 0.0630  |
| 1849 | S;S-87 89_C Q9C0C9  | (E3-independent UBE2O KIAA     | -1.8655 | -1.6095 | -1.5305 | -1.8056 | -2.0439 | -1.4665 | -1.7339 | -1.6635 | -1.6353 | -1.3104 |
| 1850 | S;S-87 93_C Q13523  | Serine/threonine PRPF4B KIAA   | -1.8329 | -2.3646 | -1.6210 | -1.4252 | 3.3606  | 3.2055  | NA      | NA      | -2.0598 | -2.0862 |
| 1851 | S;S-871 876 Q9UQ35  | Serine/arginine r SRRM2 KIAA   | -0.2982 | -0.1714 | -0.4539 | -0.2755 | -0.1259 | -0.4280 | -0.0746 | -0.5339 | -0.3255 | -0.0418 |
| 1852 | S;S-872 874 Q9Y5B0  | RNA polymerase CTDP1 FCP1      | 1.0945  | 1.1940  | 1.2307  | 0.8132  | 0.9370  | 0.8799  | 0.9431  | 1.2088  | 0.9280  | 0.6351  |
| 1853 | S;S-875 876 Q9UQ35  | Serine/arginine r SRRM2 KIAA   | 0.1163  | 0.2089  | 0.1706  | 0.3643  | 0.0009  | 0.1348  | -0.0774 | 0.0643  | 0.3060  | 0.1618  |
| 1854 | S;S-883 884 Q01831  | DNA repair prote XPC XPCC      | 0.4929  | 0.4638  | -0.2189 | -0.2021 | 0.2380  | 0.2766  | 0.0685  | 0.0242  | -0.4712 | -0.4215 |
| 1855 | S;S-89 90_C Q14738  | Serine/threonine PPP2R5D       | 0.1926  | 0.1612  | -0.2213 | -0.1677 | -0.2065 | -0.3164 | -0.1490 | -0.4089 | -0.3786 | 0.0000  |
| 1856 | S;S-89 91_C Q5VUA4  | Zinc finger protei ZNF318 HRII | 0.3612  | 0.0077  | 0.2182  | 0.5796  | 0.4127  | 0.0950  | 0.1998  | 0.4268  | 0.2954  | 0.4307  |
| 1857 | S;S-901 909 Q8IX07  | Zinc finger protei ZFPM1 FOG   | -0.7036 | -0.5597 | -0.8192 | -0.7537 | -0.9485 | -0.9360 | -0.4774 | -0.9226 | -0.9129 | -0.8591 |
| 1858 | S;S-91 93_C Q9HCG8  | Pre-mRNA-splicir CWC22 KIAA    | -0.3071 | -0.2788 | 0.4823  | 0.4239  | 0.5436  | 0.8847  | 0.5415  | 0.8995  | 0.5288  | -0.0181 |
| 1859 | S;S-919 923 Q9P107  | GEM-interacting GMIP           | 1.2052  | 0.9636  | 1.2119  | 1.0558  | 0.5499  | 0.8661  | 0.7073  | 0.7986  | 0.7398  | 0.5410  |
| 1860 | S;S-936 948 Q9P1Y6  | PHD and RING fir PHRF1 KIAA    | -0.7916 | -0.8498 | -0.6372 | -0.4911 | -1.0251 | -0.5753 | -0.7711 | -0.7253 | -0.7819 | -0.6327 |
| 1861 | S;S-94 98_I I3L1I5  | Rho guanine nuc ARHGEF18 K     | -0.9749 | -1.1727 | -1.2534 | -1.3282 | -1.3470 | -1.1736 | -1.1751 | -0.9969 | -0.9476 | -0.9987 |
| 1862 | S;S-942 952 O60763  | General vesicular USO1 VDP     | -0.8361 | -1.0279 | -0.6162 | -0.6083 | -0.8456 | -0.5977 | -0.8139 | -0.7482 | -0.7357 | -1.0299 |
| 1863 | S;S-946 948 O15042  | U2 snRNP-associ U2SURP KIAA    | 0.8173  | 0.8941  | 1.2208  | 2.0130  | 2.1166  | 1.4800  | 1.9735  | 1.8465  | 1.0447  | 1.2349  |
| 1864 | S;S-952 954 Q9UQ35  | Serine/arginine r SRRM2 KIAA   | -0.7948 | -1.3561 | 0.9132  | 0.2950  | 0.2597  | 0.9385  | -0.6338 | 0.5717  | 0.8464  | 0.8229  |
| 1865 | S;S-953 955 Q9H2P0  | Activity-depende ADNP ADNP     | -0.0054 | 0.0628  | -0.3462 | -0.2123 | -0.2129 | -0.2690 | -0.3880 | -0.4171 | -0.4077 | -0.2710 |
| 1866 | S;S-956 960 Q92974  | Rho guanine nuc ARHGEF2 KI     | 0.1671  | -0.1080 | 0.3790  | 0.3322  | 0.3578  | 0.5055  | 0.1941  | 0.4085  | 0.4173  | 0.4231  |
| 1867 | S;S;S-108 11 Q9HAZ1 | Dual specificity p CLK4        | 2.6910  | 2.1896  | 1.4077  | 2.3951  | 2.6309  | 1.8099  | 3.1450  | 2.4449  | 1.3469  | 1.6393  |
| 1868 | S;S;S-109 11 P19484 | Transcription fac TFEB BHLHE   | 0.3140  | 0.4924  | 0.5829  | 0.5176  | 0.4361  | 0.5355  | 0.2682  | 0.4200  | 0.4299  | 0.3663  |
| 1869 | S;S;S-12 13 P45973  | Chromobox prot CBX5 HP1A       | -0.1254 | -0.2055 | -0.2220 | 0.0098  | -0.3322 | -0.3606 | -0.3837 | -0.7265 | 0.0225  | 0.1452  |
| 1870 | S;S;S-124 1 Q9H4L7  | SWI/SNF-related SMARCAD1 I     | 0.3140  | 0.0860  | 0.0464  | -0.2627 | 0.0192  | -0.0717 | -0.0196 | -0.1261 | 0.2046  | 0.2215  |
| 1871 | S;S;S-140 1 Q9Y2U8  | Inner nuclear me LEMD3 MAN     | -3.3004 | -3.9553 | -3.9048 | -3.4936 | -2.9699 | -3.3219 | -3.0732 | -3.4232 | -3.5759 | -3.5456 |
| 1872 | S;S;S-141 1 Q5QJE6  | Deoxynucleotidy DNTTIP2 ERI    | 0.9028  | 1.0665  | 1.1310  | 1.2130  | 0.7394  | 1.4960  | 1.1706  | 1.2015  | 0.9066  | 1.1362  |

|      |              |        |                                  |         |         |         |         |         |         |         |         |         |         |
|------|--------------|--------|----------------------------------|---------|---------|---------|---------|---------|---------|---------|---------|---------|---------|
| 1873 | S;S;S-1478 1 | Q9UQ35 | Serine/arginine r SRRM2 KIAA     | 0.8182  | 0.6146  | 0.5730  | 1.0955  | 1.1065  | 0.7112  | 1.4494  | 0.9526  | 0.6357  | 0.9449  |
| 1874 | S;S;S-1512 1 | P51531 | Probable global t SMARCA2 B      | 0.7829  | 0.9978  | 0.6873  | 0.8403  | 0.3287  | 1.2042  | 0.6221  | 0.6526  | 0.3818  | 0.3452  |
| 1875 | S;S;S-1522 1 | Q02880 | DNA topoisomer TOP2B             | 0.2964  | 0.2002  | 0.0655  | -0.0397 | 0.0498  | 0.1389  | 0.1573  | -0.1161 | -0.1122 | -0.2373 |
| 1876 | S;S;S-154 1  | Q5JTV8 | Torsin-1A-interact TOR1AIP1 L    | -0.0385 | -0.2326 | -0.5923 | -0.5841 | -0.7009 | -0.7197 | -0.7210 | -0.8492 | -0.8135 | -0.8755 |
| 1877 | S;S;S-156 1  | O75494 | Serine/arginine-r SRSF10 FUSI    | -0.5850 | -0.4169 | 0.7054  | 0.5422  | 0.8083  | 0.7030  | 1.0378  | 0.9053  | 0.6171  | 0.9097  |
| 1878 | S;S;S-1579 1 | Q9UQ35 | Serine/arginine r SRRM2 KIAA     | -1.1484 | -0.7459 | -0.7124 | -0.5576 | -0.5290 | -0.8344 | -0.7125 | -0.6371 | -0.7400 | -0.5381 |
| 1879 | S;S;S-163 1  | Q16629 | Serine/arginine-r SRSF7 SFRS7    | 0.9191  | 0.9441  | 0.5149  | 0.6918  | 0.7036  | 0.5800  | 0.8027  | 0.5530  | 0.5680  | 0.5507  |
| 1880 | S;S;S-165 1  | Q16629 | Serine/arginine-r SRSF7 SFRS7    | 1.2232  | 1.6813  | 0.9661  | 0.8531  | 1.1243  | 0.7328  | 1.3566  | 0.7854  | 0.8500  | 0.9819  |
| 1881 | S;S;S-174 1  | Q9Y4C8 | Probable RNA-bind RBM19 KIAA     | -1.2479 | -1.0055 | -0.9206 | -1.1128 | -0.6567 | -0.8029 | -0.8485 | -1.0721 | -0.7752 | -0.7863 |
| 1882 | S;S;S-179 1  | Q16629 | Serine/arginine-r SRSF7 SFRS7    | 2.0441  | 2.1592  | 1.1753  | 1.9006  | 1.6991  | 1.0936  | 1.8943  | 1.4505  | 1.3541  | 1.4919  |
| 1883 | S;S;S-18 2   | Q9UHR5 | SAP30-binding p SAP30BP HC       | -2.2224 | -2.6403 | -3.2485 | -3.2373 | -3.7069 | -3.0392 | -2.9884 | -3.1145 | -3.0382 | -3.0116 |
| 1884 | S;S;S-192 1  | Q8N450 | Coiled-coil domain CCDC82 HT0    | -0.3525 | -0.4452 | -0.3436 | -0.3349 | -0.2431 | 0.0597  | -0.6059 | -0.1194 | -0.0720 | -0.2464 |
| 1885 | S;S;S-193 1  | Q8NAV1 | Pre-mRNA-splicing PRPF38A        | -0.0895 | -0.1009 | 0.2299  | -0.1244 | -0.0420 | 0.1984  | -0.0302 | 0.3736  | 0.2986  | 0.1525  |
| 1886 | S;S;S-2009 2 | P18583 | Protein SON (Bax) SON C21orf5    | 0.6077  | 0.5720  | 0.6451  | 0.4798  | 0.5785  | 0.5345  | 0.6431  | 0.5758  | 0.5983  | 0.6260  |
| 1887 | S;S;S-2042 2 | Q9UQ35 | Serine/arginine r SRRM2 KIAA     | 0.9587  | 1.0225  | 0.9450  | 0.8343  | 0.8041  | 0.7148  | 0.7665  | 0.7154  | 1.0219  | 1.1692  |
| 1888 | S;S;S-218 2  | P55198 | Protein AF-17 (Al) MLLT6 AF17    | -0.3049 | -0.5243 | 0.6418  | 0.7277  | 0.7014  | 0.7541  | 0.7403  | 0.8376  | 0.5758  | 0.9335  |
| 1889 | S;S;S-224 2  | Q86YV0 | RAS protein activ RASAL3         | -1.2224 | -1.0011 | -0.0907 | 0.0541  | -0.8032 | -0.1753 | -0.3330 | -0.2388 | -0.1977 | 0.1444  |
| 1890 | S;S;S-229 2  | Q9H1E3 | Nuclear ubiquitin NUCKS1 NU      | 0.5801  | 0.4702  | 0.6841  | 0.9603  | 0.5698  | 0.6594  | 0.3762  | 0.4325  | 0.7131  | 0.7658  |
| 1891 | S;S;S-230 2  | P35659 | Protein DEK DEK                  | 0.3640  | 0.5040  | 0.2804  | 0.2804  | 0.0242  | 0.2132  | -0.0632 | 0.2739  | 0.1819  | 0.0530  |
| 1892 | S;S;S-274 2  | Q6KC79 | Nipped-B-like protein NIPBL IDN3 | 0.3904  | 0.1838  | 0.7534  | 0.4657  | 0.3904  | 0.4510  | 0.5053  | 0.6910  | 0.6923  | 0.6736  |
| 1893 | S;S;S-296 2  | P08240 | Signal recognition SRPRA SRPR    | 0.1082  | 0.0184  | -0.0570 | -0.1900 | -0.1081 | -0.0866 | -0.6796 | -0.5936 | -0.2957 | -0.4168 |
| 1894 | S;S;S-299 3  | Q13247 | Serine/arginine-r SRSF6 SFRS6    | -0.3388 | -0.2771 | -0.3004 | -0.2007 | -0.0895 | -0.0628 | -0.1123 | 0.0279  | 0.2792  | 0.2822  |
| 1895 | S;S;S-30 3   | Q9Y2V2 | Calcium-regulate CARHSP1         | 1.0304  | 0.9922  | 0.8249  | 0.7627  | 0.6991  | 0.9993  | 0.7231  | 0.8963  | 0.8311  | 0.6598  |
| 1896 | S;S;S-307 3  | Q13769 | THO complex subunit THOC5 C22c   | -0.4374 | -0.3655 | -0.0426 | -0.3093 | -0.2825 | -0.2777 | -0.3671 | -0.4721 | -0.2387 | -0.2853 |
| 1897 | S;S;S-311 3  | Q8TF01 | Arginine/serine-r PNISR C6orf    | -1.2915 | -1.3675 | -1.3172 | -1.7269 | -1.0364 | -1.1049 | -0.9603 | -0.8883 | -1.2112 | -0.9657 |
| 1898 | S;S;S-316 3  | Q9NY61 | Protein AATF (A) AATF CHE1 I     | 0.6941  | 0.6010  | 0.4847  | 0.5445  | 0.6565  | 0.8302  | 0.6473  | 0.7123  | 0.5557  | 0.5548  |
| 1899 | S;S;S-317 3  | Q5C9Z4 | Nucleolar MIF4G NOM1 C7orf       | 0.4578  | 0.4098  | 0.4634  | 0.3294  | 0.3918  | 0.4554  | 0.2289  | 0.2298  | 0.3908  | 0.2946  |
| 1900 | S;S;S-323 3  | Q43823 | A-kinase anchor AKAP8 AKAF       | 0.7129  | 0.8453  | -0.1177 | 0.1788  | -0.0883 | -0.3905 | 0.2399  | -0.2515 | -0.3535 | -0.0352 |
| 1901 | S;S;S-330 3  | Q9BW71 | HIRA-interacting HIRIP3          | 0.8764  | 0.8673  | 0.7896  | 0.8442  | 0.8720  | 0.6947  | 0.8409  | 0.6633  | 1.0455  | 1.0032  |
| 1902 | S;S;S-331 3  | Q14978 | Nucleolar and co NOLC1 KIAA      | 0.7744  | 0.9794  | 0.5553  | 0.8639  | 0.8240  | 0.9213  | 0.7001  | 0.8204  | 1.2315  | 1.0709  |
| 1903 | S;S;S-332 3  | Q9NYV4 | Cyclin-dependent CDK12 CRK7      | 0.2786  | 0.1311  | 0.1613  | 0.4580  | 0.5698  | 0.2913  | 0.5081  | 0.4902  | 0.3937  | 0.4018  |
| 1904 | S;S;S-34 4   | P19338 | Nucleolin (Protein NCL           | -1.7394 | -1.8319 | -1.7038 | -1.8627 | -1.9203 | -2.0030 | -2.0408 | -1.7027 | -1.3337 | -1.4617 |
| 1905 | S;S;S-352 3  | P13746 | HLA class I histoc HLA-A HLAA    | 1.8897  | 1.8251  | -0.6437 | -0.4762 | -0.8589 | -0.7444 | -1.0382 | -1.1446 | 0.9961  | 0.6168  |
| 1906 | S;S;S-353 3  | Q9Y2W2 | WW domain-binding WBP11 NPV      | 0.1263  | 0.1552  | 0.2055  | 0.0779  | -0.0288 | 0.4258  | 0.0759  | 0.4639  | 0.4328  | 0.1409  |
| 1907 | S;S;S-357 3  | Q8N554 | Zinc finger protein ZNF276 CEN   | 0.1196  | 0.2146  | -0.6569 | -0.5215 | -0.0805 | -0.7670 | -0.1447 | -0.6562 | -0.5395 | -0.5934 |
| 1908 | S;S;S-362 3  | Q96ST2 | Protein IWS1 homolog IWS1L       | 0.9258  | 1.9366  | 2.0420  | 2.1886  | 1.9805  | 2.1043  | 2.0722  | 2.0946  | 1.9136  | 1.9264  |
| 1909 | S;S;S-364 3  | Q9BRD0 | BUD13 homolog BUD13              | 0.7744  | 0.7823  | 0.7099  | 0.4092  | 0.8333  | 0.4379  | 0.6953  | 0.4583  | 0.6907  | 0.9240  |
| 1910 | S;S;S-365 3  | Q12874 | Splicing factor 3A SF3A3 SAP6    | -0.6290 | -0.9682 | -0.8137 | -0.6973 | -0.8194 | -0.5621 | -0.8255 | -0.7767 | -0.7954 | -1.0131 |
| 1911 | S;S;S-366 3  | Q7Z4V5 | Hepatoma-derived HDGFL2 HDG      | 0.6089  | 0.7090  | 0.3790  | 0.3588  | 0.4496  | 0.3543  | 0.4711  | 0.4716  | 0.2215  | 0.4259  |

|      |                |        |                    |          |        |         |         |         |         |         |         |         |         |         |         |
|------|----------------|--------|--------------------|----------|--------|---------|---------|---------|---------|---------|---------|---------|---------|---------|---------|
| 1912 | S;S;S-378 37   | Q8N554 | Zinc finger protei | ZNF276   | CEN    | 0.4903  | 0.5742  | 0.6154  | 0.6617  | 0.7416  | 0.9948  | 0.5424  | 0.8135  | 0.6120  | 0.4777  |
| 1913 | S;S;S-389 38   | Q8IYB3 | Serine/arginine r  | SRRM1    | SRM    | 1.3918  | 1.5217  | 0.4765  | 0.6101  | 0.7671  | 0.3873  | 0.7232  | 0.5051  | 0.3555  | 0.4839  |
| 1914 | S;S;S-397 39   | Q01831 | DNA repair prote   | XPC      | XPCC   | 1.1934  | 1.1813  | 1.1538  | 1.5514  | 1.6347  | 1.6942  | 1.6297  | 1.5921  | 0.8355  | 1.4023  |
| 1915 | S;S;S-407 40   | P23497 | Nuclear autoanti   | SP100    |        | 0.0987  | -0.0189 | 0.0615  | 0.1503  | -0.2762 | 0.1589  | -0.2155 | -0.3223 | -0.3093 | -0.3624 |
| 1916 | S;S;S-419 41   | Q9P210 | Cleavage and pol   | CPSF2    | CPSF1  | 0.0945  | 0.3186  | 0.3620  | 0.1772  | 0.1344  | 0.2481  | -0.1050 | 0.2363  | 0.2943  | 0.1594  |
| 1917 | S;S;S-420 42   | Q9NTZ6 | RNA-binding pro    | RBM12    | KIAA   | 0.8304  | 1.0490  | -0.0522 | 0.8293  | 0.1774  | 0.6584  | 0.6179  | 0.1356  | -0.1784 | -0.1082 |
| 1918 | S;S;S-431 43   | Q13435 | Splicing factor    | 3E SF3B2 | SAP14  | 1.4479  | 1.3546  | 1.3878  | 1.3044  | 1.5084  | 1.2260  | 1.3128  | 1.3004  | 1.4825  | 1.5281  |
| 1919 | S;S;S-435 45   | Q9UQ35 | Serine/arginine r  | SRRM2    | KIAA   | 1.1246  | 1.2953  | 0.6002  | 0.7752  | 1.1056  | 0.5939  | 1.0378  | 0.6458  | 0.7194  | 0.8869  |
| 1920 | S;S;S-441 44   | Q5SSJ5 | Heterochromatir    | HP1BP3   |        | -0.7080 | -0.6618 | -0.9848 | -0.7618 | -0.3789 | -0.5695 | -0.9553 | -0.8870 | -1.1171 | -1.0041 |
| 1921 | S;S;S-455 48   | Q7Z5L9 | Interferon regula  | IRF2BP2  |        | -0.1504 | -0.0496 | -0.0697 | -0.1637 | 0.0373  | 0.1005  | -0.0475 | -0.0169 | -0.1579 | 0.0531  |
| 1922 | S;S;S-466 46   | O75925 | E3 SUMO-proteir    | PIAS1    | DDXBI  | -1.0366 | -1.4498 | -1.2238 | -1.2206 | -1.6772 | -1.3444 | -1.5707 | -1.2032 | -1.4533 | -1.1735 |
| 1923 | S;S;S-470 47   | Q5JSH3 | WD repeat-cont     | WDR44    |        | 0.7074  | 0.7218  | 0.3222  | 0.2529  | 0.4434  | 0.4412  | 0.3524  | 0.5103  | 0.4352  | 0.5302  |
| 1924 | S;S;S-488 49   | Q9C0K0 | B-cell lymphoma    | BCL11B   | CTIP   | -0.4753 | -0.3978 | 0.1547  | -0.0125 | 0.1774  | 0.2876  | -0.3412 | -0.0061 | 0.7043  | 0.7883  |
| 1925 | S;S;S-518 52   | P29590 | Protein PML (Pr    | PML      | MYL PP | 0.4644  | 0.5593  | 0.6756  | 0.4106  | 0.5723  | 0.7148  | 0.3180  | 0.4062  | 0.6273  | 0.5742  |
| 1926 | S;S;S-529 53   | Q9UPN7 | Serine/threonine   | PPP6R1   | KIAA   | 0.4352  | 0.4288  | 0.4234  | 0.3166  | 0.3635  | 0.6809  | 0.4196  | 0.5161  | 0.5243  | 0.2809  |
| 1927 | S;S;S-57 60    | Q13442 | 28 kDa heat- and   | PDAP1    | HASF   | 0.7670  | 0.6844  | 0.9165  | 0.7804  | 0.8751  | 1.1676  | 0.8725  | 1.2447  | 0.9273  | 0.8236  |
| 1928 | S;S;S-591 59   | Q43290 | U4/U6.U5 tri-sn    | R SART1  |        | -0.0628 | -0.0404 | -0.5813 | -0.8370 | -0.7589 | -0.9078 | -0.5980 | -0.9818 | -0.7954 | -0.8826 |
| 1929 | S;S;S-603 60   | Q05209 | Tyrosine-protein   | PTPN12   |        | 0.0251  | 0.1710  | 0.0331  | -0.0089 | -0.5316 | -0.3145 | -0.4720 | -0.3204 | -0.5320 | -0.5251 |
| 1930 | S;S;S-615 61   | Q9Y6X4 | Soluble lamin-as   | FAM169A  | KI     | -0.0459 | -0.2443 | -0.0105 | -0.2648 | -0.0195 | 0.0838  | -0.2228 | -0.0077 | 0.0956  | -0.0299 |
| 1931 | S;S;S-635 62   | Q9Y6X4 | Soluble lamin-as   | FAM169A  | KI     | -0.3491 | -0.3950 | -0.0335 | -0.0642 | -0.3461 | -0.1505 | -0.2760 | -0.3001 | 0.0713  | -0.1346 |
| 1932 | S;S;S-645 64   | Q8N2M8 | CLK4-associating   | CLASRP   | SFRS   | 0.2621  | -0.0055 | 0.5120  | 0.9252  | 0.7249  | 0.7532  | 0.7216  | 0.7228  | 0.4299  | 0.4656  |
| 1933 | S;S;S-671 67   | Q08945 | FACT complex su    | SSRP1    | FACT   | 1.2833  | 1.1294  | 1.5715  | 1.6047  | 1.3827  | 1.4757  | 1.3188  | 1.4703  | 1.6893  | 1.8861  |
| 1934 | S;S;S-69 73    | Q9H4L4 | Sentrin-specific   | SEN3     | SSP3   | -2.3923 | -2.6197 | -2.6937 | -2.7567 | -2.8194 | -2.6090 | -2.6338 | -3.1145 | -3.0490 | -2.4867 |
| 1935 | S;S;S-723 72   | P98175 | RNA-binding pro    | RBM10    | DXS    | 0.0000  | 0.0088  | 0.2083  | -0.3394 | -0.1120 | 0.0782  | -0.1050 | -0.1311 | 0.0993  | 0.2379  |
| 1936 | S;S;S-73 75    | Q7KZ85 | Transcription elo  | SUPT6H   | KIAA   | -0.0348 | 0.0671  | 0.1992  | -0.0636 | -0.0844 | 0.0133  | 0.0155  | -0.0899 | 0.0536  | -0.1633 |
| 1937 | S;S;S-738 74   | Q8IYB3 | Serine/arginine r  | SRRM1    | SRM    | 0.5417  | 0.6552  | 0.5611  | 0.9774  | 0.7642  | 0.6945  | 1.2805  | 0.9319  | 0.4732  | 0.6574  |
| 1938 | S;S;S-752 75   | Q8IYB3 | Serine/arginine r  | SRRM1    | SRM    | -0.2221 | -0.0169 | -0.5036 | -0.0287 | -0.1929 | -0.4494 | -0.0049 | -0.4004 | -0.7244 | -0.4763 |
| 1939 | S;S;S-778 78   | Q9UQ35 | Serine/arginine r  | SRRM2    | KIAA   | 0.5570  | 0.3195  | 0.2520  | 0.5114  | 0.5636  | 0.3046  | 0.6111  | 0.3617  | 0.2665  | 0.3940  |
| 1940 | S;S;S-795 79   | Q8IYB3 | Serine/arginine r  | SRRM1    | SRM    | 1.2247  | 1.1969  | 0.8885  | 1.2568  | 1.0444  | 1.2387  | 0.9123  | 1.2486  | 0.9457  | 0.9707  |
| 1941 | S;S;S-807 80   | Q9BZF1 | Oxysterol-bindin   | OSBPL8   | KIAA   | 0.6336  | 0.5653  | 0.5745  | 0.3657  | 0.2961  | 0.5427  | 0.4888  | 0.3158  | 0.1186  | 0.1629  |
| 1942 | S;S;S-860 86   | Q6GYQ0 | Ral GTPase-activ   | RALGAPA1 | C      | -0.9573 | -0.8985 | -0.4961 | -0.5734 | -0.6596 | -0.3944 | -0.8816 | -0.7559 | -0.8044 | -0.8222 |
| 1943 | S;S;S-914 91   | Q9P107 | GEM-interacting    | GMIP     |        | 0.7741  | 0.7716  | 0.8181  | 0.8228  | 0.2096  | 0.3573  | 0.3096  | 0.4031  | 0.6755  | 0.6355  |
| 1944 | S;S;S-95 97    | P62995 | Transformer-2 pr   | TRA2B    | SFRS   | 0.0757  | 0.4411  | 0.7608  | 0.2746  | 0.8292  | 0.5579  | 0.8710  | 0.9510  | 0.9987  | 1.1531  |
| 1945 | S;S;S-972 97   | Q9UQ35 | Serine/arginine r  | SRRM2    | KIAA   | 0.6617  | 0.9506  | 0.9169  | 1.3975  | 1.3421  | 1.1311  | 1.3122  | 1.1768  | 0.9887  | 1.2315  |
| 1946 | S;S;S-98 100   | Q14814 | Myocyte-specific   | MEF2D    |        | -0.4066 | -0.1941 | -0.2275 | -0.2248 | -0.3307 | -0.0654 | -0.3087 | 0.0918  | -0.3485 | -0.8382 |
| 1947 | S;S;S-99 102   | P17096 | High mobility gr   | HMGA1    | HM     | 1.2378  | 1.7225  | 1.1891  | 1.1999  | 1.4875  | 1.5914  | 1.4659  | 1.4251  | 1.2153  | 1.2237  |
| 1948 | S;S;T-2018 102 | Q9UQ35 | Serine/arginine r  | SRRM2    | KIAA   | 0.7606  | 0.8866  | 0.6391  | 0.7288  | 0.6210  | 0.6270  | 0.7604  | 0.7942  | 0.7131  | 0.8244  |
| 1949 | S;S;T-2030 102 | Q9UQ35 | Serine/arginine r  | SRRM2    | KIAA   | 0.0642  | 0.0037  | 0.0359  | -0.0327 | 0.0268  | -0.0328 | 0.0891  | 0.0801  | 0.0721  | 0.0898  |
| 1950 | S;S;T-288 102  | Q9UKM9 | RNA-binding pro    | RALY     | HNRPC  | -0.0403 | -0.0727 | -0.3004 | 0.0627  | -0.2784 | -0.3749 | -0.3745 | -0.2790 | -0.3974 | -0.4777 |

|      |              |          |                    |               |         |         |         |         |         |         |         |         |         |         |
|------|--------------|----------|--------------------|---------------|---------|---------|---------|---------|---------|---------|---------|---------|---------|---------|
| 1951 | S;S;T-461 48 | P18887   | DNA repair prote   | XRCC1         | -1.4703 | -1.2261 | -1.9365 | -1.7328 | -1.5158 | -1.4461 | -1.5631 | -2.1278 | -1.5528 | -1.4903 |
| 1952 | S;S;T-475 48 | P18887   | DNA repair prote   | XRCC1         | -0.7274 | -0.6437 | -1.0275 | -0.7387 | -0.9592 | -0.9735 | -1.0065 | -1.0372 | -1.1292 | -0.9859 |
| 1953 | S;T-108 110  | P35251   | Replication facto  | RFC1 RFC14C   | -1.5688 | -1.5243 | -2.1246 | -2.0197 | -1.7620 | -1.9970 | -1.9131 | -2.1822 | -2.0982 | -1.9066 |
| 1954 | S;T-114 118  | Q96T60   | Bifunctional poly  | PNKP          | 0.4774  | 0.3623  | 1.3055  | 0.6572  | 0.9205  | 0.8505  | 0.8718  | 0.7862  | 0.5134  | 0.4478  |
| 1955 | S;T-1376 13  | Q14669   | E3 ubiquitin-prot  | TRIP12 KIAA   | 0.1079  | -0.0891 | -0.6785 | -0.6083 | -0.7069 | -0.7394 | -0.7040 | -0.9788 | -0.9351 | -0.9859 |
| 1956 | S;T-161 165  | Q1KMD3   | Heterogeneous r    | HNRNPUL2 I    | 0.4617  | 0.5274  | 0.3340  | 0.5114  | 0.3974  | 0.2888  | 0.6841  | 0.4870  | -0.1449 | 0.1606  |
| 1957 | S;T-1925 19  | Q9UQ35;Q | Serine/arginine r  | SRRM2 KIAA    | -1.7154 | -2.1234 | -1.9420 | -1.5376 | -1.2987 | -2.3350 | -1.5463 | -1.8484 | -1.9992 | -1.8273 |
| 1958 | S;T-2020 20  | Q9UQ35   | Serine/arginine r  | SRRM2 KIAA    | -2.5742 | -2.5927 | -2.1246 | -2.6192 | -1.7069 | -2.6181 | -2.5478 | -2.1822 | -2.2385 | -1.8970 |
| 1959 | S;T-2032 20  | Q9UQ35   | Serine/arginine r  | SRRM2 KIAA    | -2.5602 | -2.2271 | -2.6990 | -2.4209 | -2.3503 | -2.6107 | -2.4502 | -2.3209 | -2.6504 | -2.4835 |
| 1960 | S;T-326 327  | P24723   | Protein kinase C   | PRKCH PKCL    | 1.2749  | 1.2312  | 1.6857  | 1.0089  | 1.3192  | 1.1116  | 1.8496  | 1.4432  | 0.8435  | 0.2746  |
| 1961 | S;T-329 331  | Q14676   | Mediator of DNA    | MDC1 KIAAC    | -0.4956 | -0.6594 | -0.1395 | -0.6274 | -0.4590 | -0.2583 | -0.2927 | -0.3377 | 0.0091  | -0.1166 |
| 1962 | S;T-337 338  | Q4G0J3   | La-related protei  | LARP7 HDCN    | 0.8489  | 1.0328  | 0.3252  | 0.5182  | 0.4522  | 0.3461  | 0.3506  | 0.4170  | -0.0743 | 0.0893  |
| 1963 | S;T-355 356  | Q9Y2K1   | Zinc finger and B  | ZBTB1 KIAAC   | -0.0274 | 0.0198  | -0.5534 | -0.3304 | -0.4215 | -0.3238 | -0.4470 | -0.8274 | -0.7976 | -0.8498 |
| 1964 | S;T-356 358  | Q13427   | Peptidyl-prolyl ci | PPIG          | 0.0877  | 0.1532  | -0.0285 | -0.1283 | -0.1421 | -0.5820 | -0.0144 | -0.1598 | -0.1977 | -0.0418 |
| 1965 | S;T-358 365  | Q92994   | Transcription fac  | BRF1 BRF GT   | -0.6318 | -0.7477 | -0.6275 | -0.9221 | -0.7311 | -0.5040 | -0.6809 | -0.4212 | -0.5133 | -0.4706 |
| 1966 | S;T-376 378  | Q14676   | Mediator of DNA    | MDC1 KIAAC    | 0.3356  | 0.4222  | 0.0331  | -0.0125 | -1.0942 | -1.0180 | -0.1036 | -0.1892 | -0.1917 | -0.1124 |
| 1967 | S;T-385 389  | P35269   | General transcrip  | GTF2F1 RAP    | 0.7029  | 0.8229  | 0.3232  | 0.4875  | 0.3692  | 0.1550  | 0.4767  | 0.2193  | 0.1400  | 0.0813  |
| 1968 | S;T-397 402  | Q9NYF8   | Bcl-2-associated   | BCLAF1 BTF    | 1.1403  | 0.9967  | 0.9537  | 0.9082  | 0.7580  | 0.7829  | 0.7915  | 0.9597  | 0.9777  | 0.8149  |
| 1969 | S;T-402 406  | Q8IYB3   | Serine/arginine r  | SRRM1 SRM     | 1.4890  | 1.5464  | 1.4950  | 1.4266  | 1.3806  | 1.5919  | 1.4432  | 1.5956  | 1.5858  | 1.3643  |
| 1970 | S;T-420 426  | Q9Y606   | tRNA pseudouric    | PUS1 PP898    | -2.2056 | -2.1979 | -1.7630 | -2.1878 | -2.2562 | -1.9106 | -2.2168 | -1.8658 | -2.3206 | -1.8591 |
| 1971 | S;T-485 488  | P18887   | DNA repair prote   | XRCC1         | -0.4187 | -0.3790 | -0.6114 | -0.3326 | -0.6223 | -0.6763 | -0.6238 | -1.0372 | -0.9832 | -0.4867 |
| 1972 | S;T-492 494  | Q6UN15   | Pre-mRNA 3'-enc    | FIP1L1 FIP1 I | -0.9678 | -0.4881 | -0.6852 | -0.6777 | -0.9238 | -0.6480 | -0.7535 | -0.8911 | -0.8459 | -0.7752 |
| 1973 | S;T-577 583  | Q9UQ88   | Cyclin-dependen    | CDK11A CDC    | 0.1655  | 0.0639  | 0.1594  | 0.4567  | 0.0987  | 0.5117  | 0.4813  | 0.6458  | 0.5697  | 0.3613  |
| 1974 | S;T-596 599  | Q3YEC7   | Rab-like protein   | RABL6 C9orf   | -1.2182 | -1.1382 | -1.4597 | -1.3782 | -1.6365 | -1.4872 | -1.6178 | -1.9758 | -1.8624 | -1.4027 |
| 1975 | S;T-710 711  | Q8IX21   | SMC5-SMC6 corr     | SLF2 C10orf   | 0.5322  | 0.4484  | 0.0824  | 0.2221  | 0.0426  | 0.0177  | 0.1873  | -0.1194 | -0.2837 | 0.0293  |
| 1976 | S;T-725 727  | Q8IYB3   | Serine/arginine r  | SRRM1 SRM     | -1.9055 | -2.3818 | -0.7056 | -0.5734 | -0.5721 | -0.5019 | -0.4311 | -0.3052 | -0.6993 | -0.7555 |
| 1977 | S;T-770 774  | Q02446   | Transcription fac  | SP4           | -0.7668 | -1.0599 | -1.2068 | -1.4109 | -1.6713 | -1.3983 | -1.7083 | -1.6159 | -1.4604 | -1.3591 |
| 1978 | S;T-790 793  | Q4LE39   | AT-rich interacti  | ARID4B BRC    | 0.4955  | 0.6418  | 0.8308  | 0.7373  | 0.4670  | 0.8120  | 0.5618  | 0.4727  | 0.7729  | 0.5854  |
| 1979 | S;T-808 810  | Q9UQ35;Q | Serine/arginine r  | SRRM2 KIAA    | -5.0553 | -4.4169 | -1.7701 | -1.3016 | 0.0515  | -0.7645 | -0.9204 | -1.2424 | -1.4967 | -1.3723 |
| 1980 | S;T-855 856  | Q9H0E3   | Histone deacetyl   | SAP130        | 0.2964  | 0.3221  | 0.1928  | 0.0490  | 0.2901  | 0.4434  | 0.1303  | 0.3402  | 0.5591  | 0.3009  |
| 1981 | S;T-915 917  | Q9P1Y6   | PHD and RING fir   | PHRF1 KIAA    | -0.7036 | -0.3775 | -0.4771 | -1.1919 | -1.2784 | -1.1372 | -1.1840 | -1.0785 | -1.0170 | -0.4885 |
| 1982 | S;T;S-105 11 | Q8NE71   | ATP-binding cass   | ABCF1 ABC5    | 0.9007  | 0.8471  | 1.0227  | 0.8733  | 0.8913  | 1.1003  | 0.6884  | 0.7307  | 0.9706  | 0.6183  |
| 1983 | S;T;S-161 16 | Q1KMD3   | Heterogeneous r    | HNRNPUL2 I    | 0.7228  | 0.9766  | 0.3742  | 0.1646  | 0.2581  | 0.2864  | 0.2992  | -0.1513 | 0.2192  | 0.2499  |
| 1984 | S;T;S-1854 1 | Q9UQ35   | Serine/arginine r  | SRRM2 KIAA    | 1.1879  | 1.6844  | 1.3415  | 1.1030  | 1.6454  | 1.0243  | 1.8890  | 1.4336  | 1.3133  | 1.4331  |
| 1985 | S;T;S-2067 2 | Q9UQ35   | Serine/arginine r  | SRRM2 KIAA    | 0.2934  | 0.5057  | 0.3974  | 0.4173  | 0.2871  | 0.3391  | 0.2520  | 0.4004  | 0.4173  | 0.5559  |
| 1986 | S;T;S-889 88 | Q9BTW9   | Tubulin-specific   | TBCD KIAA0    | -2.8329 | -3.1382 | -2.7559 | -3.1558 | -3.1060 | -2.9106 | -2.7339 | -2.2753 | -2.4930 | -2.2851 |
| 1987 | S;T;Y-113 11 | P58335   | Anthrax toxin rec  | ANTXR2 CM     | -0.2461 | -0.2057 | 0.0769  | -0.0399 | -0.3028 | -0.0102 | -0.2054 | -0.1825 | -0.3193 | -0.2201 |
| 1988 | S;Y-53 54_C  | Q9Y2W1   | Thyroid hormon     | THRAP3 BCL    | 1.6405  | 2.4112  | 1.3303  | 1.2906  | 1.3382  | 0.8935  | 1.5675  | 1.1848  | 1.3464  | 1.5334  |
| 1989 | T-1003_Q9U   | Q9UQ35   | Serine/arginine r  | SRRM2 KIAA    | 0.4041  | 0.2854  | 0.9693  | 0.9091  | 0.8861  | 0.8447  | 0.7496  | 0.7603  | 1.3258  | 1.3381  |

|      |            |        |                               |         |         |         |         |         |         |         |         |         |         |
|------|------------|--------|-------------------------------|---------|---------|---------|---------|---------|---------|---------|---------|---------|---------|
| 1990 | T-101_Q9UK | Q9UKK3 | Protein mono-AC PARP4 ADPF    | 0.6148  | 0.5072  | 0.3612  | 0.6595  | 0.1903  | 0.4147  | 0.2399  | 0.4016  | 0.6704  | 0.7771  |
| 1991 | T-103_Q9HE | Q9H8M2 | Bromodomain-cc BRD9 UNQ3      | 0.6370  | 0.6432  | 0.7534  | 0.5151  | 0.5436  | 0.7975  | 0.7489  | 0.8655  | 0.8075  | 0.4211  |
| 1992 | T-104_Q148 | Q14847 | LIM and SH3 don LASP1 MLN5    | 0.8666  | 0.7425  | 0.7509  | 0.8901  | 0.3169  | 0.8035  | 0.6137  | 0.8290  | 0.5556  | 0.5142  |
| 1993 | T-118_Q96T | Q96T60 | Bifunctional poly PNKP        | 0.3154  | 0.2744  | 0.6571  | 0.6539  | 0.5599  | 0.7093  | 0.4579  | 0.5310  | -0.2022 | 0.1114  |
| 1994 | T-122_P384 | P38432 | Coilin (p80-coilin COIL CLN80 | -0.0899 | -0.0611 | -0.1266 | -0.1397 | -0.0043 | 0.1125  | -0.0305 | 0.0045  | 0.0187  | -0.1599 |
| 1995 | T-1220_O43 | O43426 | Synaptojanin-1 (I SYNJ1 KIAA0 | 0.2115  | 0.2031  | 0.5829  | 0.7416  | 0.4684  | 0.5488  | 0.4147  | 0.3438  | 0.3454  | 0.1479  |
| 1996 | T-1305_Q96 | Q96T23 | Remodeling and RSF1 HBXAP     | -1.8785 | -1.7865 | -2.2886 | -2.1401 | -2.1721 | -2.6232 | -2.2722 | -2.5156 | -2.2931 | -2.3973 |
| 1997 | T-134_Q7LD | Q7LDG7 | RAS guanyl-relea RASGRP2 CC   | -0.0837 | -0.0212 | 1.4014  | 2.0871  | 1.4717  | 1.8750  | 2.0065  | 2.0665  | 1.6175  | 1.4717  |
| 1998 | T-135_Q9BR | Q9BRD0 | BUD13 homolog BUD13           | -2.9964 | -2.6197 | -3.4284 | -3.8822 | -3.1544 | -3.2353 | -3.3103 | -3.0123 | -3.1150 | -3.5307 |
| 1999 | T-139_Q8W  | Q8WW12 | PEST proteolytic PCNP         | 0.2255  | 0.3142  | -0.2773 | 0.2553  | -0.3055 | 0.1198  | -0.3678 | -0.0031 | 0.0091  | 0.1019  |
| 2000 | T-139_Q96N | Q96MW1 | Coiled-coil doma CCDC43       | -0.0292 | -0.0576 | 0.0177  | -0.1109 | -0.2964 | 0.0554  | -0.2675 | -0.0785 | 0.0296  | -0.0247 |
| 2001 | T-1440_Q96 | Q96BY6 | Dedicator of cytc DOCK10 KIA  | 0.5910  | 0.4492  | -0.0863 | 0.1788  | -0.1605 | 0.7515  | 0.4739  | 0.5043  | 0.0956  | 0.0468  |
| 2002 | T-1468_Q7Z | Q7Z6E9 | E3 ubiquitin-prot RBBP6 P2PR  | 0.7413  | 0.6066  | 0.5787  | 0.9839  | 0.9049  | 0.7699  | 0.7520  | 0.8169  | 0.6298  | 0.5232  |
| 2003 | T-148_Q96N | Q96MU7 | YTH domain-coni YTHDC1 KIA    | -2.1167 | -2.4407 | -0.7297 | -1.0197 | -0.7250 | -0.4002 | -0.9987 | -0.6205 | -0.1887 | -0.1490 |
| 2004 | T-149_Q9H7 | Q9H7E2 | Tudor domain-cc TDRD3         | -5.1167 | -6.0997 | -5.4742 | -4.6192 | -4.6138 | -5.7519 | -4.2350 | -5.4232 | -5.2082 | -5.4301 |
| 2005 | T-1492_Q9U | Q9UQ35 | Serine/arginine r SRRM2 KIAA  | -0.7184 | -0.6334 | -1.4713 | -0.9876 | -1.0669 | -1.3944 | -1.0435 | -0.8520 | -1.2949 | -1.0699 |
| 2006 | T-169_Q131 | Q13177 | Serine/threonine PAK2         | -0.0329 | -0.1104 | 0.1166  | -0.0994 | -0.0496 | 0.1945  | -0.0157 | 0.1740  | 0.3320  | -0.0958 |
| 2007 | T-1733_Q9B | Q9BTC0 | Death-inducer ol DIDO1 C20o   | -0.1128 | -0.2042 | -0.0952 | 0.0963  | 0.1806  | -0.0438 | -0.1722 | -0.3808 | 0.1090  | 0.1721  |
| 2008 | T-174_Q137 | Q13765 | Nascent polypep NACA HSD4     | 0.6681  | 0.7983  | -0.6034 | -0.0397 | -0.2279 | -0.0060 | -0.1795 | -0.1211 | -0.3871 | -0.2587 |
| 2009 | T-181_O438 | O43829 | Zinc finger and B ZBTB14 ZFP1 | -1.0478 | -1.1406 | -0.6356 | -0.7007 | -0.5237 | -0.3827 | -1.0760 | -0.8742 | -0.3905 | -0.2102 |
| 2010 | T-183_P247 | P24723 | Protein kinase C PRKCH PKCL   | -0.6977 | -0.9704 | -1.7314 | -0.8921 | -1.8194 | -1.4022 | -1.1664 | -1.2244 | -1.6597 | -1.9657 |
| 2011 | T-195_Q155 | Q15527 | Surfeit locus prot SURF2      | -0.3595 | -0.5274 | -0.2262 | -0.4015 | 0.1610  | 0.1630  | 0.0129  | 0.0889  | 0.0104  | -0.5288 |
| 2012 | T-206_Q96P | Q96PK6 | RNA-binding pro RBM14 SIP     | 0.1785  | 0.0412  | 0.1300  | 0.1365  | 0.1596  | 0.0986  | 0.0846  | 0.1091  | 0.2271  | 0.4837  |
| 2013 | T-208_P421 | P42167 | Lamina-associate TMPO LAP2    | 0.2455  | 0.2881  | 0.5582  | 0.6929  | 0.6222  | 0.7881  | 0.9116  | 0.6662  | 0.3341  | 0.3613  |
| 2014 | T-2083_Q9U | Q9UMN6 | Histone-lysine N- KMT2B HRX   | -0.9785 | -0.8841 | -0.7630 | -0.9982 | -0.8324 | -1.0270 | -0.7800 | -0.9818 | -0.6312 | -0.8685 |
| 2015 | T-21_Q9Y3Z | Q9Y3Z3 | Deoxynucleoside SAMHD1 MC     | -0.0609 | -0.1406 | -0.2140 | -0.2373 | -0.4615 | -0.2907 | -0.4488 | -0.3630 | -0.5338 | -0.2464 |
| 2016 | T-211_O151 | O15173 | Membrane-assoc PGRMC2 DG      | 1.3682  | 1.5798  | NA      | NA      | -0.0844 | 0.2937  | -0.0856 | 0.3232  | -0.2758 | -0.3740 |
| 2017 | T-215_Q7L1 | Q7L190 | Developmental p DPPA4         | -0.5768 | -0.5532 | -0.2250 | -0.2542 | -0.9308 | -0.7027 | -0.5459 | -0.7127 | -0.5817 | -0.4336 |
| 2018 | T-220_Q8IY | Q8IYB3 | Serine/arginine r SRRM1 SRM   | 1.5679  | 1.6787  | 0.8915  | 0.8870  | 1.2533  | 0.8939  | 1.0718  | 0.8751  | 0.9250  | 0.9139  |
| 2019 | T-223_Q9BX | Q9BXS5 | AP-1 complex sul AP1M1 CLT    | -0.4779 | -0.3114 | -0.4815 | -0.4062 | -0.4264 | -0.0577 | -0.5177 | -0.3319 | -0.2187 | -0.2147 |
| 2020 | T-228_Q161 | Q16181 | Septin-7 (CDC10 SEPTIN7 CD    | -0.9202 | -1.1004 | 0.1267  | -0.6862 | -0.1487 | -0.4519 | -0.6240 | -0.6399 | 0.8727  | 1.0087  |
| 2021 | T-2320_Q01 | Q01082 | Spectrin beta ch; SPTBN1 SPT  | -0.0685 | 0.3777  | -0.1395 | -0.1899 | -0.3588 | 0.5396  | 0.2487  | 0.2923  | 0.5503  | 0.4393  |
| 2022 | T-235_P176 | P17676 | CCAAT/enhancer CEBPB TCF5     | -0.3735 | -0.3032 | -0.1522 | -0.2352 | -0.1792 | -0.0165 | -0.3661 | -0.4335 | 0.1126  | 0.0331  |
| 2023 | T-242_O751 | O75113 | NEDD4-binding p N4BP1 KIAA    | 1.3682  | 1.2127  | 1.2595  | 1.3435  | 1.0683  | 1.2055  | 1.1969  | 1.1432  | 1.0877  | 1.0071  |
| 2024 | T-254_Q53G | Q53GL0 | Pleckstrin homol PLEKHO1 CK   | 1.0233  | 0.8991  | 0.4451  | 0.6044  | 0.3477  | 1.0915  | 0.4878  | 0.5172  | 0.2922  | 0.1947  |
| 2025 | T-262_O757 | O75791 | GRB2-related ad; GRAP2 GAD    | -2.4956 | -2.5632 | -1.9163 | -1.9775 | -1.7714 | -1.8460 | -2.0921 | -1.9687 | -1.8595 | -2.0425 |
| 2026 | T-267_P550 | P55081 | Microfibrillar-ass MFAP1      | -0.4728 | -1.0832 | -0.1733 | -0.3782 | -0.1300 | -0.3053 | -0.2879 | -0.4989 | -0.1392 | 0.1652  |
| 2027 | T-271_P279 | P27987 | Inositol-trisphos; ITPKB      | 0.9634  | 0.8618  | 0.9429  | 0.9205  | 0.9852  | 1.2387  | 0.9511  | 1.1025  | 1.0852  | 0.8481  |
| 2028 | T-280_O607 | O60759 | Cytoshesin-intera CYTIP PSCDE | 0.5247  | 0.4214  | 1.3013  | 0.8122  | 1.4347  | 0.7093  | 1.6489  | 0.7098  | 1.2080  | 0.8388  |

|      |            |        |                    |              |         |         |         |         |         |         |         |         |         |         |
|------|------------|--------|--------------------|--------------|---------|---------|---------|---------|---------|---------|---------|---------|---------|---------|
| 2029 | T-287_Q135 | Q13555 | Calcium/calmodu    | CAMK2G CA    | 0.9937  | 0.7635  | -0.1852 | 1.4715  | -0.1482 | 1.2126  | 1.3677  | 1.2524  | -0.1221 | -0.4095 |
| 2030 | T-287_Q135 | Q13557 | Calcium/calmodu    | CAMK2D CA    | 0.7478  | 0.8428  | 0.4581  | 2.3965  | 1.2635  | 1.9358  | 2.5960  | 2.0889  | 0.3566  | -0.9457 |
| 2031 | T-291_P041 | P04114 | Apolipoprotein B   | APOB         | -1.4211 | -1.3308 | 1.0755  | -0.4228 | 0.6412  | -1.3482 | 0.3232  | -1.0785 | -1.0463 | -1.3723 |
| 2032 | T-302_Q9BR | Q9BRQ0 | Pygopus homolo     | PYGO2 PP79   | 0.8735  | 0.8679  | 0.8077  | 0.5915  | 0.5649  | 0.4897  | 0.5750  | 0.6202  | 0.9497  | 0.6999  |
| 2033 | T-309_Q86Y | Q86YS7 | C2 domain-conta    | C2CD5 CDP1   | 1.2029  | 1.2890  | 1.5244  | 1.2590  | 1.5593  | 1.1490  | 1.2907  | 1.1418  | 1.0723  | 0.7149  |
| 2034 | T-314_Q8TB | Q8TB03 | Uncharacterized    | CXorf38      | 0.7445  | 1.0171  | -0.2522 | -0.0269 | -0.0515 | -0.2214 | -0.1332 | -0.4903 | -0.5778 | -0.3443 |
| 2035 | T-328_Q925 | Q92597 | Protein NDRG1 (I   | NDRG1 CAP4   | -0.8954 | -1.0122 | 0.2405  | -0.0452 | 0.2348  | -0.1471 | 0.4588  | -0.1857 | -0.1917 | -0.3459 |
| 2036 | T-33_P2798 | P27987 | Inositol-trisphos  | ITPKB        | -0.3735 | -0.3142 | -0.0952 | 0.0421  | -0.2673 | -0.0423 | -0.1605 | -0.1446 | -0.1179 | 0.0518  |
| 2037 | T-330_P0C7 | P0C7T5 | Ataxin-1-like (Br  | ATXN1L BOA   | -0.5317 | -0.6334 | -0.7366 | -0.4517 | -0.6365 | -0.4810 | -0.5863 | -0.4669 | -0.2790 | -0.2162 |
| 2038 | T-34_P6232 | P62328 | Thymosin beta-4    | TMSB4X TB4   | 0.1542  | -0.1188 | 0.2290  | -0.0107 | -0.1917 | -0.1871 | -0.1022 | -0.0641 | 0.1830  | 0.1256  |
| 2039 | T-358_Q134 | Q13427 | Peptidyl-prolyl    | ci PPIG      | -1.5634 | -1.5532 | -1.9689 | -1.6301 | -1.4794 | -1.6692 | -1.4276 | -1.6879 | -1.6888 | -1.6959 |
| 2040 | T-365_Q929 | Q92994 | Transcription fac  | BRF1 BRF G1  | -1.3049 | -1.3675 | -1.2509 | -1.4787 | -1.3146 | -1.1274 | -1.2198 | -1.0850 | -0.9401 | -1.0405 |
| 2041 | T-376_Q9C0 | Q9C0K0 | B-cell lymphoma    | BCL11B CTIP  | -0.5501 | -0.3046 | -0.6751 | -0.7994 | -0.8357 | -0.9332 | -0.6582 | -0.9314 | -0.6212 | -0.6208 |
| 2042 | T-393_Q9UK | Q9UKV3 | Apoptotic chrom    | ACIN1 ACINI  | 0.4852  | 0.8722  | 0.8314  | 0.8756  | -0.0288 | -0.2145 | 0.6849  | 0.7684  | 1.1899  | 0.9562  |
| 2043 | T-394_P365 | P36507 | Dual specificity n | MAP2K2 ME    | 0.4155  | 0.1830  | 0.7241  | 0.8026  | 0.7404  | 0.8534  | 0.7923  | 0.8014  | 0.2988  | 0.1668  |
| 2044 | T-398_Q435 | Q43516 | WAS/WASL-inter     | WIPF1 WASI   | -0.3876 | -0.3905 | -0.9425 | -0.3552 | -0.4439 | -0.0623 | -0.2457 | -0.0705 | -0.4111 | -0.4441 |
| 2045 | T-4030_Q15 | Q15149 | Plectin (PCN) (P   | L PLEC PLEC1 | -0.8854 | -1.2522 | 0.1575  | -0.9771 | 0.2333  | -1.4220 | 0.3822  | -0.0466 | -0.9426 | -0.9632 |
| 2046 | T-4100_Q09 | Q09666 | Neuroblast differ  | AHNAK PM2    | -0.6179 | -0.4711 | -0.6735 | -0.7036 | -1.0746 | -0.7874 | -0.9935 | -0.9939 | -0.9961 | -1.1193 |
| 2047 | T-416_Q8IY | Q8IYB3 | Serine/arginine r  | SRRM1 SRM    | -4.6402 | -3.5274 | -3.0533 | -3.1878 | -2.8064 | -3.4956 | -3.1988 | -3.8166 | -3.0816 | -2.9910 |
| 2048 | T-417_Q9C0 | Q9C0K0 | B-cell lymphoma    | BCL11B CTIP  | -0.1995 | -0.1872 | -0.2960 | -0.1447 | -0.0674 | -0.0030 | -0.3082 | -0.1050 | 0.3128  | 0.3588  |
| 2049 | T-418_Q9BR | Q9BRZ2 | E3 ubiquitin-prot  | TRIM56 RNF   | 1.2523  | 1.1056  | 1.1315  | 1.1534  | 1.3095  | 1.3291  | 1.2492  | 1.3365  | 1.2012  | 0.9213  |
| 2050 | T-426_Q161 | Q16181 | Septin-7 (CDC10    | SEPTIN7 CDC  | 0.8426  | 0.8818  | 0.8559  | 0.7846  | 0.4401  | 0.6260  | 0.6945  | 0.7449  | 0.5189  | 0.1721  |
| 2051 | T-426_Q9Y6 | Q9Y606 | tRNA pseudouric    | PUS1 PP898   | -0.1994 | -0.1212 | -0.0211 | -0.1838 | -0.1320 | -0.0392 | -0.0651 | -0.0185 | -0.0316 | -0.0312 |
| 2052 | T-447_Q9P2 | Q9P2N5 | RNA-binding pro    | RBM27 KIAA   | -3.7576 | -3.7477 | -3.3409 | -3.4347 | -2.9133 | -3.0515 | -3.5631 | -3.4903 | -3.5003 | -2.8922 |
| 2053 | T-450_Q152 | Q15233 | Non-POU domain     | NONO NRBS    | -0.3342 | -0.1467 | -0.3369 | -0.3735 | -0.5667 | -0.3866 | -0.3265 | -0.3435 | -0.0449 | -0.1376 |
| 2054 | T-453_P188 | P18887 | DNA repair prote   | XRCC1        | 1.4137  | 1.4476  | 1.5642  | 1.6201  | 1.3848  | 1.5948  | 1.3201  | 1.3800  | 1.3300  | 1.4577  |
| 2055 | T-454_Q8N1 | Q8N163 | Cell cycle and ap  | CCAR2 DBC1   | -0.6516 | -0.4635 | -0.2584 | -0.5343 | -0.7558 | -0.7569 | -0.6830 | -0.4397 | -0.3320 | -0.2464 |
| 2056 | T-458_Q608 | Q60832 | H/ACA ribonucle    | DKC1 NOLA4   | 0.8513  | 0.8548  | 0.4757  | 0.5624  | 0.8128  | 0.7773  | 0.5109  | 0.5978  | 0.7798  | 0.8048  |
| 2057 | T-475_Q8TD | Q8TDZ2 | [F-actin]-monoo    | MICAL1 MIC   | 0.9362  | 0.9481  | 0.9921  | 1.0071  | 1.1453  | 0.8238  | 1.1315  | 0.7693  | 0.6137  | 0.6360  |
| 2058 | T-4766_Q09 | Q09666 | Neuroblast differ  | AHNAK PM2    | 0.4813  | 0.5396  | -0.0708 | 0.0678  | -0.1523 | -0.1670 | -0.1781 | -0.3610 | -0.4515 | -0.3541 |
| 2059 | T-51_Q5SSJ | Q5SSJ5 | Heterochromatin    | HP1BP3       | 1.0945  | 1.3824  | 1.5064  | 1.4580  | 1.9283  | 1.5514  | 1.6318  | 1.5161  | 1.2740  | 1.2978  |
| 2060 | T-526_Q6PK | Q6PKG0 | La-related protei  | LARP1 KIAA   | 1.0419  | 1.0989  | 0.5546  | 0.8492  | 0.9068  | 0.9268  | 1.0289  | 0.7247  | 0.7918  | 0.8862  |
| 2061 | T-528_Q9NF | Q9NPI6 | mRNA-decapping     | DCP1A SMIF   | 0.1395  | 0.2108  | 0.1697  | 0.2598  | 0.0119  | 0.2418  | -0.0408 | 0.0875  | 0.0524  | 0.0331  |
| 2062 | T-53_Q96N  | Q96NI6 | Leucine-rich rep   | LFN5 C14o    | -0.7214 | -0.7038 | 0.0382  | 0.1804  | 0.6483  | 0.3485  | 0.2530  | 0.4946  | 0.1899  | 0.2883  |
| 2063 | T-544_Q9BX | Q9BXP5 | Serrate RNA effe   | SRRT ARS2 A  | 0.1724  | 0.1715  | 0.0050  | 0.2541  | 0.0504  | 0.0613  | 0.0072  | 0.0592  | 0.1562  | 0.4309  |
| 2064 | T-556_Q151 | Q15111 | Inactive phospho   | PLCL1        | -0.7668 | -0.7514 | -0.5907 | -0.7358 | -0.4539 | -0.3983 | -0.5785 | -0.3709 | -0.4622 | -0.4180 |
| 2065 | T-584_Q9UF | Q9UPR0 | Inactive phospho   | PLCL2 KIAA1  | 0.6284  | 0.5699  | 0.8257  | 0.5201  | 0.5494  | 0.9065  | 0.8467  | 0.9880  | 0.7769  | 0.5325  |
| 2066 | T-614_Q8IY | Q8IYB3 | Serine/arginine r  | SRRM1 SRM    | -0.5405 | -0.6186 | -0.3121 | -0.2373 | -0.2162 | -0.3508 | -0.3518 | -0.3085 | -0.3310 | -0.3179 |
| 2067 | T-620_Q2M  | Q2M218 | AP2-associated p   | AAK1 KIAA1   | 0.5989  | 0.6002  | 0.9926  | 0.7995  | 1.1310  | 1.1333  | 0.6683  | 0.7717  | 0.8864  | 0.7424  |



|      |             |        |                    |              |         |         |         |         |         |         |         |         |         |         |
|------|-------------|--------|--------------------|--------------|---------|---------|---------|---------|---------|---------|---------|---------|---------|---------|
| 2068 | T-671_Q96C  | Q96QT6 | PHD finger prote   | PHF12 KIAA   | 0.3370  | 0.3327  | -0.0436 | 0.0264  | 0.0083  | -0.1033 | 0.0410  | -0.1530 | 0.1281  | 0.1315  |
| 2069 | T-682_Q9UK  | Q9UKV3 | Apoptotic chrom    | ACIN1 ACINI  | -0.2871 | -0.3322 | -0.7227 | -0.5761 | -0.6138 | -0.3053 | -0.5765 | -0.4627 | -0.5605 | -0.4267 |
| 2070 | T-692_Q9NY  | Q9NYV4 | Cyclin-dependen    | CDK12 CRK7   | -0.5823 | -0.5745 | -0.5110 | -0.7507 | -0.6194 | -1.0180 | -0.5707 | -0.8826 | -0.9755 | -0.9309 |
| 2071 | T-723_Q5VT  | Q5VT52 | Regulation of nu   | RPRD2 KIAA   | 0.5765  | 0.7498  | 0.5603  | 0.6009  | 0.5181  | 0.4269  | 0.5126  | 0.5342  | 0.3647  | 0.6384  |
| 2072 | T-748_Q134  | Q13427 | Peptidyl-prolyl ci | PPIG         | -0.8721 | -0.8221 | -0.2092 | -0.1283 | -0.5184 | -0.5061 | -0.7275 | -0.4543 | -0.6192 | -0.2898 |
| 2073 | T-754_Q6GY  | Q6GYQ0 | Ral GTPase-activ   | RALGAPA1 C   | -1.8655 | -2.0484 | -0.0222 | -0.6551 | -0.1708 | -1.1049 | -0.4311 | -0.8547 | -0.4008 | -0.7752 |
| 2074 | T-754_Q9C0  | Q9C0K0 | B-cell lymphoma    | BCL11B CTIP  | 0.0706  | 0.0143  | -0.6114 | -0.2289 | -0.2762 | -0.5909 | -0.4883 | -0.7177 | -0.4268 | -0.0971 |
| 2075 | T-8_P45973  | P45973 | Chromobox prot     | CBX5 HP1A    | 0.3752  | 0.5779  | 0.5164  | 0.4476  | 0.5736  | 0.7202  | 0.4244  | 0.5140  | 0.8127  | 0.5690  |
| 2076 | T-84_Q9BW   | Q9BW71 | HIRA-interacting   | HIRIP3       | -1.9191 | -2.3818 | -2.3840 | -2.8181 | -2.1300 | -2.3444 | -2.4810 | -2.1412 | -1.9007 | -2.2541 |
| 2077 | T-848_Q9UC  | Q9UQ35 | Serine/arginine r  | SRRM2 KIAA   | -2.1726 | -1.9639 | -2.1155 | -1.9020 | -1.8927 | -1.7271 | -2.0732 | -1.9878 | -1.9501 | -1.9066 |
| 2078 | T-852_O954  | O95425 | Supervillin (Arch  | SVIL         | -0.3829 | 0.0436  | -0.8642 | -0.0018 | -0.4439 | 1.0583  | 0.6985  | 0.5363  | -0.4515 | -0.3120 |
| 2079 | T-866_Q9UC  | Q9UQ35 | Serine/arginine r  | SRRM2 KIAA   | -1.5422 | -1.1928 | -1.7489 | -1.7627 | -2.0364 | -1.8133 | -1.7601 | -1.9939 | -1.9302 | -1.9066 |
| 2080 | T-888_Q76F  | Q76FK4 | Nucleolar protei   | NOL8 C9orf   | 0.3569  | 0.3115  | 0.3156  | 0.2130  | 0.3621  | 0.4313  | 0.2189  | 0.1230  | 0.3788  | 0.2401  |
| 2081 | T-899_Q9HC  | Q9HC35 | Echinoderm micr    | EML4 C2orf   | -2.7948 | -2.4650 | -2.5095 | -2.6749 | -3.1708 | -2.2145 | -2.9180 | -2.7637 | -2.3939 | -1.8222 |
| 2082 | T-925_Q6PC  | Q6PD62 | RNA polymerase     | CTR9 KIAA01  | 0.9708  | 0.9003  | 1.5378  | 1.2305  | 1.4523  | 1.1341  | 1.3336  | 1.3402  | 1.4154  | 1.3752  |
| 2083 | T-947_Q140  | Q14005 | Pro-interleukin-1  | IL16         | 0.5692  | -0.0438 | 0.4273  | 0.1866  | 0.4842  | 0.3296  | 0.8109  | 0.9542  | -0.0329 | 0.3782  |
| 2084 | T-953_Q128  | Q12802 | A-kinase anchor    | AKAP13 BRX   | -0.3296 | -0.4619 | 0.2137  | 0.0813  | -0.0844 | 0.2087  | -0.1988 | 0.0889  | 0.1773  | 0.0318  |
| 2085 | T-99_Q0966  | Q09666 | Neuroblast differ  | AHNAK PM2    | 1.1387  | 1.0734  | 1.5695  | 1.2993  | 1.0657  | 1.0059  | 1.2250  | 1.1039  | 0.4075  | -0.0524 |
| 2086 | T;S-101 102 | Q9GZT3 | SRA stem-loop-ir   | SLIRP C14orf | 1.8212  | 1.7697  | 1.0433  | 1.2006  | 0.8477  | 0.9377  | 1.3065  | 1.2134  | 0.7668  | 0.6143  |
| 2087 | T;S-1010 10 | Q96L91 | E1A-binding prot   | EP400 CAGH   | 0.4205  | 0.6425  | -0.8738 | -0.4468 | -0.6654 | -0.5468 | -0.5140 | -0.9578 | -0.8250 | -0.4476 |
| 2088 | T;S-108 109 | Q8NE71 | ATP-binding cass   | ABCF1 ABC5   | 0.5838  | 0.4876  | 1.0448  | 0.5592  | 0.9731  | 1.1603  | 0.8241  | 0.9295  | 0.9804  | 0.6655  |
| 2089 | T;S-1171 11 | Q13017 | Rho GTPase-activ   | ARHGAP5 Rf   | 0.1312  | 0.1808  | 0.5432  | 0.4489  | 0.5142  | 0.5590  | 0.2949  | 0.2272  | 0.3607  | 0.3206  |
| 2090 | T;S-1186 11 | Q9Y3R5 | Protein dopey-2    | DOP1B C21c   | -0.7979 | -0.7969 | -0.9628 | -0.9597 | -0.8423 | -0.7721 | -1.0435 | -1.0031 | -0.8838 | -0.8041 |
| 2091 | T;S-12 14_C | Q9NZC7 | WW domain-con      | WWOX FOR     | -1.0478 | -1.2923 | -1.1200 | -1.0674 | -1.5970 | -1.2214 | -1.5289 | -1.6300 | -1.5226 | -1.3790 |
| 2092 | T;S-1305 13 | Q96T23 | Remodeling and     | RSF1 HBXAP   | -1.1564 | -0.6559 | -0.5065 | -0.8181 | -1.0213 | -1.0060 | -0.7756 | -0.7767 | -0.4444 | -0.5232 |
| 2093 | T;S-14 17_C | Q13761 | Runt-related trar  | RUNX3 AML    | -0.5877 | -0.7969 | -0.6618 | -1.1167 | -0.5694 | -0.4002 | -0.2706 | -0.4606 | -0.7487 | -0.7469 |
| 2094 | T;S-147 162 | P29692 | Elongation facto   | EEF1D EF1D   | 0.0708  | 0.3007  | 0.3704  | 0.2014  | 0.1121  | 0.4083  | 0.0566  | 0.3054  | 0.3278  | 0.1185  |
| 2095 | T;S-159 163 | Q9BRD0 | BUD13 homolog      | BUD13        | 0.1523  | 0.2321  | -0.0266 | -0.1503 | 0.0827  | -0.0078 | 0.1759  | -0.1643 | -0.1216 | 0.0031  |
| 2096 | T;S-165 168 | Q1KMD3 | Heterogeneous r    | HNRNPUL2 I   | 0.9239  | 1.1612  | 0.8896  | 0.8462  | 0.6774  | 0.7725  | 1.0808  | 0.7933  | 0.6180  | 0.8214  |
| 2097 | T;S-175 177 | P33241 | Lymphocyte-spei    | LSP1 WP34    | -0.1384 | -0.0622 | -0.5907 | -0.1858 | -0.0535 | -0.4260 | -0.2365 | -0.2496 | -0.4129 | -0.3345 |
| 2098 | T;S-202 204 | Q9H1E3 | Nuclear ubiquito   | NUCKS1 NU    | 1.0427  | 0.9476  | 0.0784  | 1.2083  | 0.8323  | 0.6622  | 0.8049  | 0.9383  | 0.5547  | 0.5905  |
| 2099 | T;S-258 260 | Q63ZY6 | Putative methylt   | NSUN5P2 N    | 1.6242  | 1.8116  | 1.5178  | 1.8182  | 1.8260  | 1.9063  | 1.7527  | 1.6536  | 1.5148  | 1.6409  |
| 2100 | T;S-263 265 | Q5T200 | Zinc finger CCCH   | ZC3H13 KIA   | -0.7080 | -0.7254 | -1.3253 | -0.6152 | -0.4249 | -1.3450 | -0.3698 | -0.9468 | -1.3698 | -1.2197 |
| 2101 | T;S-2738 27 | Q9UQ35 | Serine/arginine r  | SRRM2 KIAA   | -0.2783 | 0.0533  | -0.2850 | -0.4541 | -0.1340 | -0.3866 | -0.0157 | -0.1770 | -0.1814 | -0.1249 |
| 2102 | T;S-376 381 | Q9C0K0 | B-cell lymphoma    | BCL11B CTIP  | 0.3125  | 0.4517  | -0.1534 | 0.2993  | 0.1871  | 0.0382  | -0.0774 | 0.0347  | 0.2643  | 0.3742  |
| 2103 | T;S-391 392 | Q6GMV2 | SET and MYND d     | SMYD5 RAI1   | -2.2739 | -2.5728 | -2.4340 | -2.6749 | -2.9414 | -2.7721 | -2.2784 | -2.6442 | -2.6972 | -2.8638 |
| 2104 | T;S-436 441 | P85037 | Forkhead box pri   | FOXK1 MNF    | 0.4137  | 0.7550  | 0.3047  | 0.3726  | 0.1022  | 0.2506  | 0.5521  | 0.2633  | 0.4690  | 0.6872  |
| 2105 | T;S-471 473 | Q9NV70 | Exocyst complex    | EXOC1 SEC3   | 1.9909  | 2.1369  | 1.8947  | 2.1292  | 1.6460  | 1.9903  | 1.6816  | 1.7458  | 1.5432  | 1.4791  |
| 2106 | T;S-553 554 | Q9Y618 | Nuclear receptor   | NCOR2 CTG    | 1.1021  | 1.0468  | 1.2573  | 1.8462  | 1.5064  | 1.5569  | 1.5702  | 1.5357  | 0.9232  | 1.0096  |

|      |                      |                               |         |         |         |         |         |         |         |         |         |         |
|------|----------------------|-------------------------------|---------|---------|---------|---------|---------|---------|---------|---------|---------|---------|
| 2107 | T;S-581 583 Q8IYB3   | Serine/arginine r SRRM1 SRM   | 0.0368  | 0.2467  | -0.1852 | -0.0065 | 0.3719  | -0.3402 | 0.5109  | -0.0963 | -0.3606 | -0.1403 |
| 2108 | T;S-609 616 Q8NDX5   | Polyhomeotic-lik PHC3 EDR3 I  | 0.2037  | 0.2944  | -0.2311 | 0.0558  | -0.1020 | -0.2708 | 0.0422  | -0.1412 | -0.1681 | -0.1306 |
| 2109 | T;S-614 616 Q8IYB3   | Serine/arginine r SRRM1 SRM   | 0.9503  | 0.7810  | 0.6290  | 1.0652  | 1.1013  | 0.6231  | 1.1112  | 0.8630  | 0.4830  | 0.4431  |
| 2110 | T;S-620 624 Q2M2I8   | AP2-associated p AAK1 KIAA10  | 2.1485  | 2.1747  | 1.9322  | 1.9205  | 2.0373  | 2.2459  | 2.1556  | 2.1563  | 1.8899  | 1.5485  |
| 2111 | T;S-638 640 Q66K74   | Microtubule-assc MAP1S BPY2   | 0.5607  | 0.7319  | -0.0599 | -0.2103 | -0.2651 | -0.4360 | -0.3265 | -0.3242 | -0.3386 | -0.2087 |
| 2112 | T;S-740 747 Q9ULL5   | Proline-rich prot PRR12 KIAA  | 1.2286  | 1.2340  | 0.6478  | 0.6527  | 0.7828  | 0.6910  | 0.8618  | 0.4494  | 0.5261  | 0.5267  |
| 2113 | T;S-84 87_C Q9BW71   | HIRA-interacting HIRIP3       | -0.5269 | -0.3657 | -0.6940 | -0.4881 | -0.7061 | -0.8010 | -0.5871 | -0.9470 | -0.8655 | -0.8016 |
| 2114 | T;S-872 874 Q8IYB3   | Serine/arginine r SRRM1 SRM   | 0.5384  | 0.6601  | 0.0218  | 0.2493  | 0.1839  | -0.0180 | 0.4196  | -0.0899 | -0.1725 | 0.3319  |
| 2115 | T;S-882 884 Q9NZM3   | Intersectin-2 (SH ITSN2 KIAA1 | 1.2957  | 1.2528  | 0.2970  | 0.6253  | 0.3749  | 0.9182  | 0.6857  | 0.6002  | 0.4222  | 0.3381  |
| 2116 | T;S-888 890 Q76FK4   | Nucleolar protei NOL8 C9orf3  | -0.5161 | -0.6282 | -0.5275 | -0.6467 | -0.6308 | -0.4340 | -1.1810 | -0.5972 | -0.6618 | -0.9859 |
| 2117 | T;S-93 95_C Q15111   | Inactive phosphc PLCL1        | -0.1089 | -0.1903 | -0.0609 | -0.0525 | 0.9982  | 1.3076  | 0.5415  | 0.7603  | 0.9810  | 0.6277  |
| 2118 | T;S;S-120 12 Q8WXI9  | Transcriptional r GATAD2B KI  | -1.3782 | -1.6265 | -1.1200 | -1.2842 | -1.5639 | -1.1939 | -1.6541 | -1.4191 | -1.1932 | -1.0699 |
| 2119 | T;S;S-120 12 Q8WXI9  | Transcriptional r GATAD2B KI  | 0.3583  | 0.2680  | -0.2044 | -0.1777 | -0.5237 | -0.5577 | -0.4452 | -0.2902 | -0.3452 | -0.3707 |
| 2120 | T;S;S-138 14 Q8IXQ4  | GPALPP motifs-c GPALPP1 KIA   | -0.2937 | -0.2522 | -0.5534 | -0.8562 | -0.8456 | -0.6457 | -0.7579 | -0.7585 | -0.4694 | -0.4976 |
| 2121 | T;S;S-151 15 Q9BTC0  | Death-inducer of DIDO1 C20o   | 1.0215  | 1.0474  | 0.9580  | 0.8968  | 0.9674  | 0.9023  | 0.8234  | 0.8756  | 0.8486  | 0.6719  |
| 2122 | T;S;S-202 20 Q9H1E3  | Nuclear ubiquito NUCKS1 NU    | 1.2160  | 1.0911  | 0.3997  | 0.8542  | 1.0228  | 0.6708  | 1.2249  | 1.0893  | 0.5575  | 0.6109  |
| 2123 | T;S;S-2131 2075643   | U5 small nuclear SNRNP200 A   | 1.2196  | 1.1922  | 0.3503  | 0.4968  | 0.0826  | 0.4050  | 0.2874  | 0.2706  | 0.3016  | -0.0639 |
| 2124 | T;S;S-58 61 Q9NXX6   | Non-structural r NSMCE4A C    | -2.5742 | -2.3934 | -2.3569 | -2.6523 | -2.7069 | -2.4380 | -2.5863 | -2.4397 | -2.3271 | -2.3959 |
| 2125 | T;S;S-793 79 Q8IYB3  | Serine/arginine r SRRM1 SRM   | -0.0628 | -0.1603 | -0.3004 | -0.1677 | -0.2366 | -0.2025 | -0.3561 | -0.2977 | -0.3190 | -0.2804 |
| 2126 | T;T-190 195 Q15527   | Surfeit locus prot SURF2      | 0.3696  | 0.3692  | 0.4288  | 0.0880  | 0.6138  | 0.5549  | 0.6841  | 0.6882  | 0.2226  | -0.1166 |
| 2127 | T;T-207 211 O75533   | Splicing factor 3E SF3B1 SAP1 | 1.1337  | 1.2917  | 0.9916  | 0.9456  | 0.7261  | 0.9007  | 0.9206  | 0.7782  | 0.8164  | 1.0179  |
| 2128 | T;T-223 227 O75533   | Splicing factor 3E SF3B1 SAP1 | 1.4955  | 1.8640  | 0.6126  | 0.8600  | 1.0613  | 0.8863  | 1.3002  | 0.8444  | 0.7178  | 0.9077  |
| 2129 | T;T-230 231 Q8IWW6   | Rho GTPase-activ ARHGAP12     | 0.2068  | -0.0257 | -0.7314 | -0.3782 | -0.3564 | -0.8291 | -0.3265 | -0.8274 | -0.7184 | -0.4319 |
| 2130 | T;T-51 53_P P17544   | Cyclic AMP-depe ATF7 ATFA     | -0.5187 | -0.4498 | -0.4698 | -0.4252 | -0.1708 | -0.3846 | -0.1233 | -0.4008 | -0.3518 | -0.6347 |
| 2131 | T;T-572 574 Q8IYB3   | Serine/arginine r SRRM1 SRM   | 0.0282  | 0.2390  | 0.0234  | 0.1028  | 0.4903  | -0.3712 | 0.7687  | 0.0860  | -0.1400 | 0.2425  |
| 2132 | T;T-897 899 Q9HC35   | Echinoderm micr EML4 C2orf2   | -1.4601 | -1.5588 | -1.1340 | -1.2399 | -1.5127 | -1.3737 | -1.5575 | -1.3760 | -0.9996 | -0.8787 |
| 2133 | T;T;T-223 227 O75533 | Splicing factor 3E SF3B1 SAP1 | 0.6929  | 0.8938  | -0.0328 | 0.4541  | 0.2223  | 0.3831  | 0.6017  | 0.4438  | 0.2665  | 0.2778  |
| 2134 | Y-143_P161 P16104    | Histone H2AX (H H2AX H2AFX)   | 0.8745  | 1.0382  | 1.9374  | 2.4776  | 2.3287  | 1.4330  | 2.7359  | 2.6979  | 1.0993  | 1.4028  |
| 2135 | Y-160_P325 P32519    | ETS-related trans ELF1        | 1.8011  | 1.6037  | 1.4443  | 1.4239  | 1.2597  | 1.2649  | 1.4417  | 1.2291  | 1.3128  | 1.4269  |
| 2136 | Y-1874_P24 P24928    | DNA-directed RN POLR2A POL    | 0.8335  | 0.8323  | 0.8902  | 0.9812  | 0.8999  | 0.7881  | 0.9764  | 0.8495  | 1.0000  | 0.9877  |
| 2137 | Y-260_P050 P05023    | Sodium/potassiu ATP1A1        | -0.2959 | 0.0393  | 1.2923  | 0.0264  | 1.2254  | -0.1356 | -0.0039 | -0.0657 | 0.9664  | 0.9694  |
| 2138 | Y-269_Q8W Q8WUB8     | PHD finger prote PHF10 BAF4   | -2.2739 | -2.1979 | -1.9009 | -1.9701 | -1.8064 | -1.7874 | -2.0787 | -1.9054 | -1.8814 | -2.1998 |
| 2139 | Y-321_Q136 Q13627    | Dual specificity t DYRK1A DYR | 0.7691  | 0.8354  | -0.0941 | 0.2979  | -0.2065 | 0.2985  | 0.0685  | -0.0419 | -0.4042 | -0.2162 |
| 2140 | Y-44_P0673 P06733    | Alpha-enolase (E ENO1 ENO1)   | -0.1089 | -0.1541 | -0.1121 | -0.2457 | -0.1360 | 0.0583  | -0.0842 | -0.2173 | 0.0968  | 0.0837  |
| 2141 | Y-52_Q9UID Q9UID6    | Zinc finger protei ZNF639 ZAS | 0.8079  | 1.0171  | 1.0192  | 1.0412  | 1.0064  | 1.0704  | 0.8293  | 1.0810  | 0.9396  | 0.9125  |
| 2142 | Y-571_O151 O15117    | FYN-binding prot FYB1 FYB SL  | 0.0126  | -0.0055 | -0.1212 | 0.0264  | -0.3284 | 0.2556  | 0.1562  | 0.1875  | -0.3837 | -0.6031 |
| 2143 | Y-694_P422 P42229    | Signal transducer STAT5A STA  | 1.9372  | -1.3005 | 1.5797  | -1.2248 | -0.8161 | 1.9221  | 1.7885  | -0.9788 | 1.7881  | -1.9859 |
| 2144 | Y-712_Q86Y Q86YR7    | Probable guanin MCF2L2 DRC    | 1.3668  | 1.3760  | 0.7756  | 0.8492  | 1.1725  | 1.1068  | 1.3211  | 1.2226  | 0.7249  | 0.3871  |
| 2145 | Y-849_Q135 Q13523    | Serine/threonine PRPF4B KIA   | 0.6077  | 0.6810  | 0.4935  | 0.5139  | 0.2395  | 0.5909  | 0.2843  | 0.4672  | 0.5252  | 0.6549  |

|      |                           |                                |         |         |         |         |         |         |         |         |         |         |
|------|---------------------------|--------------------------------|---------|---------|---------|---------|---------|---------|---------|---------|---------|---------|
| 2146 | Y-88_Q1515 Q15154         | Pericentriolar ma PCM1         | -0.2351 | -0.3732 | -0.4185 | -0.9666 | -0.5612 | -0.3294 | -0.5554 | -0.0434 | -0.6888 | -0.4688 |
| 2147 | Y;S-160 168 P32519        | ETS-related trans ELF1         | 0.8268  | 0.9171  | 0.4410  | 0.6909  | 0.1416  | 0.2044  | 0.5240  | 0.5287  | 0.3485  | 0.2857  |
| 2148 | Y;S-1909 19 P24928;P24928 | DNA-directed RN POLR2A POL     | 1.0619  | 0.9911  | 0.2729  | 0.4963  | 0.4790  | 0.2139  | 0.4118  | 0.1131  | 0.4774  | 0.3421  |
| 2149 | Y;S;S-160 16 P32519       | ETS-related trans ELF1         | -0.1849 | -0.1541 | -0.4185 | -0.3552 | -0.7620 | -0.4872 | -0.7756 | -0.6395 | -0.4802 | -0.5721 |
| 2150 | Y;T-400 401 Q86UW9        | Probable E3 ubiq DTX2 KIAA1199 | -1.0329 | -1.9553 | -1.7384 | -1.5087 | -1.7009 | -1.3108 | -2.0462 | -1.7952 | -2.2142 | -1.2449 |

**Supplemental Table 3.1.** Log2/median normalized TMT reporter intensities of regulated proteins of 24 h IL-7 stimulation of human primary T cell total proteome

|   | Master.Pro | Description | Control_1 | Primed_1 | Control_2 | Primed_2 | Control_3 | Primed_3 | Control_4 | Primed_4 | Control_5 | Primed_5 | rank   | produ | log2    | change |
|---|------------|-------------|-----------|----------|-----------|----------|-----------|----------|-----------|----------|-----------|----------|--------|-------|---------|--------|
| 1 | P00395     | Cytochrom   | -2.9879   | -2.3416  | -2.5541   | -1.3377  | -2.3520   | -1.9151  | -3.0521   | -1.1444  | -3.1699   | -1.8893  | 0.0107 |       | 1.0976  |        |
| 2 | Q8N960     | Centrosom   | -3.3099   | -1.7632  | -1.9315   | -1.1312  | -3.1405   | -1.7225  | -2.2088   | -2.0465  | -2.3032   | -1.7194  | 0.0341 |       | 0.9022  |        |
| 3 | Q9NVV4     | Poly(A) RN  | 0.0121    | 0.4459   | 0.2888    | 0.8790   | -0.2424   | 0.3607   | -0.3322   | 0.2419   | -0.5092   | 0.2135   | 0.0341 |       | 0.5848  |        |
| 4 | Q9UM00     | Calcium loa | -1.7451   | -1.8171  | -2.6487   | -3.5236  | -3.0150   | -3.7225  | -1.4813   | -3.5850  | -3.4500   | -4.3487  | 0.0341 |       | -0.9313 |        |
| 5 | Q9Y3T9     | Nucleolar c | -1.9099   | -1.3839  | -3.2460   | -1.5976  | -2.8995   | -2.1375  | -3.2816   | -1.7294  | -3.3268   | -2.6991  | 0.0107 |       | 1.0233  |        |

**Supplemental Table 3.2.** Log2/median normalized TMT reporter intensities of regulated phosphorylation sites of 24 h IL-7 stimulation of human primary T cell phosphoproteome

|    | pSite.in    | Mas    | Master.Pro   | Descriptor | Control_1 | Primed_1 | Control_2 | Primed_2 | Control_3 | Primed_3 | Control_4 | Primed_4 | Control_5 | Primed_5 | rank   | produ | log2    | change |
|----|-------------|--------|--------------|------------|-----------|----------|-----------|----------|-----------|----------|-----------|----------|-----------|----------|--------|-------|---------|--------|
| 1  | S-1401_P21  | P21359 | Neurofibro   |            | -0.4162   | -0.7092  | 1.3369    | 0.4463   | 1.4836    | 0.2556   | 1.4579    | 0.7854   | 0.5983    | 0.1766   | 0.0007 |       | -0.7012 |        |
| 2  | S-146_Q96A  | Q96AT1 | Uncharact    |            | -2.2652   | -2.7110  | -0.6034   | -1.9562  | -0.8995   | -2.2708  | -1.0144   | -2.1547  | -1.6272   | -2.1419  | 0.0000 |       | -0.9650 |        |
| 3  | S-168_Q014  | Q01433 | AMP deam     |            | -0.1167   | -0.5978  | 1.4830    | 1.0447   | 1.3309    | 0.6017   | 1.1975    | 0.9589   | 1.2298    | 0.8410   | 0.0157 |       | -0.4552 |        |
| 4  | S-177_O753  | O75396 | Vesicle-tra  |            | 0.4929    | 0.2962   | 0.7137    | -0.0287  | 0.5810    | -0.2128  | 0.2617    | -0.0061  | -0.3045   | -1.0431  | 0.0157 |       | -0.5479 |        |
| 5  | S-231_P017  | P01732 | T-cell surfa |            | -0.8622   | -1.1627  | 1.9805    | 0.8263   | 1.8584    | -0.6668  | 2.5122    | 0.8030   | -0.1652   | -0.3476  | 0.0062 |       | -1.1743 |        |
| 6  | S-379_P423  | P42331 | Rho GTPas    |            | -2.1011   | -2.1928  | 1.3000    | -0.1637  | 0.8528    | -1.3866  | 0.5557    | -0.6854  | -0.3618   | -1.3394  | 0.0157 |       | -1.2027 |        |
| 7  | S-51_Q86YV  | Q86YV0 | RAS protei   |            | -1.4520   | -1.6002  | 0.0292    | -0.6209  | -0.1002   | -0.7755  | 0.1485    | -0.3737  | -0.2548   | -0.7480  | 0.0157 |       | -0.4978 |        |
| 8  | S-5830_Q09  | Q09666 | Neuroblast   |            | -0.5396   | -0.8221  | 1.4323    | 0.6482   | 0.8456    | -0.2494  | 1.1279    | 0.4074   | -0.1873   | -0.3690  | 0.0111 |       | -0.6128 |        |
| 9  | S-625_Q724  | Q724V5 | Hepatoma     |            | -3.7823   | -3.3364  | -2.9608   | -2.6412  | -3.7558   | -2.8884  | -3.1634   | -2.9169  | -2.9858   | -2.6876  | 0.0181 |       | 0.4355  |        |
| 10 | S-76_Q0143  | Q01433 | AMP deam     |            | -1.4691   | -1.5356  | 0.7142    | -0.4931  | 0.4188    | -1.2389  | 0.1068    | -1.0023  | -0.8424   | -1.3122  | 0.0322 |       | -0.9021 |        |
| 11 | S-974_Q140  | Q14005 | Pro-interle  |            | -0.7547   | -1.2410  | 1.6905    | 1.3277   | 1.7614    | 1.0263   | 1.9825    | 1.2737   | 1.2835    | 0.9280   | 0.0037 |       | -0.5297 |        |
| 12 | S;S-659 663 | Q15334 | Lethal(2) g  |            | -0.5161   | -0.7589  | -0.1223   | -0.4252  | -0.0083   | -0.8967  | 0.1124    | -0.3223  | -0.8113   | -0.9885  | 0.0490 |       | -0.4092 |        |
| 13 | T-280_O607  | O60759 | Cytohesin-   |            | 0.5247    | 0.4214   | 1.3013    | 0.8122   | 1.4347    | 0.7093   | 1.6489    | 0.7098   | 1.2080    | 0.8388   | 0.0322 |       | -0.5252 |        |
| 14 | T-754_Q6GY  | Q6GYQ0 | Ral GTPase   |            | -1.8655   | -2.0484  | -0.0222   | -0.6551  | -0.1708   | -1.1049  | -0.4311   | -0.8547  | -0.4008   | -0.7752  | 0.0157 |       | -0.5096 |        |



|       |      |                            |       |           |          |   |    |    |            |                    |   |            |         |          |        |        |
|-------|------|----------------------------|-------|-----------|----------|---|----|----|------------|--------------------|---|------------|---------|----------|--------|--------|
| FALSE | High | GGSGGSYGGGGSGGGYGGG'       | TRUE  | 1.57E-06  | 0.006854 | 1 | 1  | 1  | P35527     | Keratin, type I c  | 0 | 1791.72771 |         |          |        |        |
| FALSE | High | GGISGGGYGSGGGK             | TRUE  | 0.0004229 | 0.006854 | 1 | 1  | 3  | P35908     | Keratin, type II c | 0 | 1197.54945 | 429455  |          | 80.26  |        |
| FALSE | High | GSLGGGFSSGGFSGGSFSR        | TRUE  | 8.52E-06  | 0.006854 | 1 | 1  | 2  | P13645     | Keratin, type I c  | 0 | 1707.77214 | 258308  | 7190.4   | 36.67  | 59.01  |
| FALSE | High | GSSGGGCFG 1xCarbamido      | TRUE  | 0.0368815 | 0.006854 | 1 | 1  | 1  | P13645     | Keratin, type I c  | 0 | 2342.98433 | 38311   |          | 62.82  |        |
| FALSE | High | GTDVQAWIR                  | TRUE  | 0.0543694 | 0.006854 | 1 | 1  | 1  | cRAP078    | Lysozyme C OS=     | 0 | 1045.54252 | 122815  |          | 55.84  |        |
| FALSE | High | GTGASGSFKL 3xLabel:13C(€   | FALSE | 0.154538  | 0.006854 | 2 | 5  | 1  | P16401; P  | Histone H1.5 OS    | 2 | 1312.77176 | 52445   | 48797.8  | 137.31 | 127.49 |
| FALSE | High | GYSLGNWVC 1xCarbamido      | TRUE  | 0.0021442 | 0.006854 | 1 | 1  | 1  | cRAP078    | Lysozyme C OS=     | 0 | 1325.63068 | 78526   |          | 66.56  |        |
| FALSE | High | GYTVLAAAAT 2xCarbamido     | FALSE | 0.0547751 | 0.006854 | 1 | 1  | 2  | Q9P2S6     | Ankyrin repeat a   | 0 | 3125.51428 |         |          |        |        |
| FALSE | High | HAVSEGTKAVTK               | FALSE | 0.0014791 | 0.006854 | 2 | 15 | 4  | Q16778; C  | Histone H2B typ    | 1 | 1227.66918 | 2027029 | 377090.0 | 60.81  | 65.48  |
| FALSE | High | HAVSEGTKAVTKYTSSK          | FALSE | 0.0003066 | 0.006854 | 2 | 12 | 10 | Q16778; C  | Histone H2B typ    | 2 | 1793.9392  | 801608  | 322530.7 | 91.37  | 58.70  |
| FALSE | High | HAVSEGTKAV 3xLabel:13C(€   | FALSE | 0.0139867 | 0.006854 | 2 | 12 | 4  | Q16778; C  | Histone H2B typ    | 2 | 1811.99959 |         |          |        |        |
| FALSE | High | HGLDNYRGYS 1xCarbamido     | TRUE  | 0.0488071 | 0.006854 | 1 | 1  | 2  | cRAP078    | Lysozyme C OS=     | 1 | 2181.02943 | 99002   |          | 85.4   |        |
| FALSE | High | HGLDNYRGYS 1xCarbamido     | TRUE  | 0.0956824 | 0.006854 | 1 | 1  | 1  | cRAP078    | Lysozyme C OS=     | 2 | 3590.66182 |         |          |        |        |
| FALSE | High | HQGLPQEVLENLLR             | TRUE  | 0.061456  | 0.006854 | 1 | 1  | 1  | cRAP013    | Alpha-S1-casein    | 0 | 1759.94496 | 10911   |          | 82.56  |        |
| FALSE | High | HSGNITFDEIVNIAR            | FALSE | 0.0040327 | 0.006854 | 1 | 1  | 1  | P30050     | 60S ribosomal p    | 0 | 1685.86056 |         |          |        |        |
| FALSE | High | KATGPPVSELI 2xLabel:13C(€  | FALSE | 0.0761627 | 0.006854 | 1 | 1  | 2  | P16401     | Histone H1.5 OS    | 1 | 1352.81865 | 34427   | 53720.5  | 68.92  | 80.08  |
| FALSE | High | KGTVEGFPAI 1xCarbamido     | FALSE | 0.0017041 | 0.006854 | 1 | 1  | 1  | P37108     | Signal recognitio  | 2 | 1952.04041 | 66307   | 23172.0  |        | 88.69  |
| FALSE | High | KIEEIKDFLLTAR              | FALSE | 0.0113917 | 0.006854 | 1 | 1  | 2  | P63173     | 60S ribosomal p    | 2 | 1575.91047 | 73116   |          | 12.06  |        |
| FALSE | High | KLPFQR                     | FALSE | 0.111592  | 0.006854 | 1 | 5  | 1  | P84243     | Histone H3.3 OS    | 1 | 788.47773  | 78328   | 4456.7   | 41.54  | 67.25  |
| FALSE | High | KTVTAMDVVYALKR             | FALSE | 0.0067315 | 0.006854 | 1 | 1  | 2  | P62805     | Histone H4 OS=     | 2 | 1594.89852 | 75131   | 18065.0  | 69.36  | 49.18  |
| FALSE | High | KVPQVSTPTLVEVSR            | TRUE  | 0.002814  | 0.006854 | 2 | 2  | 2  | cRAP087; S | erum albumin (     | 1 | 1639.93775 | 36298   |          | 67.36  |        |
| FALSE | High | KYSQGNVSAVGVTYDGHTAL       | TRUE  | 1.32E-07  | 0.006854 | 1 | 1  | 4  | sp         | cRAP117 00000(     | 1 | 2324.16295 | 1164605 |          | 68.38  |        |
| FALSE | High | LALDIEIATYR                | TRUE  | 0.0085937 | 0.006854 | 1 | 6  | 2  | P04264     | Keratin, type II   | 0 | 1277.70998 | 10582   |          | 37.75  |        |
| FALSE | High | LGEHNIDVLEGNEQFINAAK       | TRUE  | 4.93E-07  | 0.006854 | 1 | 1  | 3  | cRAP112    | Trypsin OS=Sus     | 0 | 2211.10404 | 7712058 |          | 30.36  |        |
| FALSE | High | LGGSAVISLEG 1xLabel:13C(€  | FALSE | 0.0113917 | 0.006854 | 1 | 1  | 2  | P23528     | Cofilin-1 OS=      | 0 | 1346.79852 | 234457  | 43744.3  | 46.11  | 32.48  |
| FALSE | High | IGRIEDVTPIPSDSTRR          | FALSE | 0.0269043 | 0.006854 | 1 | 1  | 1  | P62263     | 40S ribosomal p    | 2 | 1912.02466 |         |          |        |        |
| FALSE | High | IHRHLK                     | FALSE | 0.138266  | 0.006854 | 1 | 2  | 2  | Q71UI9     | Histone H2A.V      | 1 | 803.49987  | 276482  |          | 16.99  |        |
| FALSE | High | LKECCDKPLLE 2xCarbamido    | TRUE  | 0.0224513 | 0.006854 | 1 | 1  | 1  | cRAP087    | Serum albumin (    | 1 | 1532.78111 | 13775   |          | 91.83  |        |
| FALSE | High | LLCGLLAER 1xCarbamido      | FALSE | 0.006095  | 0.006854 | 1 | 1  | 1  | P14174     | Macrophage mi      | 0 | 1044.58703 | 60850   | 130164.0 | 87.15  | 76.14  |
| FALSE | High | IIPEIQK 1xLabel:13C(€      | FALSE | 0.215364  | 0.006854 | 1 | 1  | 1  | P55060     | Exportin-2 OS=     | 0 | 959.62312  |         |          |        |        |
| FALSE | High | LLPGELAK                   | FALSE | 0.105635  | 0.006854 | 2 | 15 | 3  | Q16778; C  | Histone H2B typ    | 0 | 953.60299  | 852848  |          | 11.76  |        |
| FALSE | High | LLRKGNYAER                 | FALSE | 0.0434779 | 0.006854 | 1 | 9  | 2  | Q16777     | Histone H2A typ    | 2 | 1219.69058 | 131618  | 17218.2  | 54.7   | 36.76  |
| FALSE | High | IITHPNFNGNTLDNDIMLIK       | TRUE  | 0.0020716 | 0.006854 | 1 | 1  | 4  | cRAP112    | Trypsin OS=Sus     | 0 | 2283.18018 | 3407499 | 11848.9  | 58.42  | 3.35   |
| FALSE | High | IITHPNFNGNT 1xOxidation [I | TRUE  | 2.29E-05  | 0.006854 | 1 | 1  | 5  | cRAP112    | Trypsin OS=Sus     | 0 | 2299.17509 | 1019261 |          | 55.4   |        |
| FALSE | High | IITHPNFNGNTLDNDIMLIKLS'    | TRUE  | 0.0057335 | 0.006854 | 1 | 1  | 1  | cRAP112    | Trypsin OS=Sus     | 1 | 3309.72599 | 56782   |          | 34.75  |        |
| FALSE | High | IMLKGDNITLL 1xLabel:13C(€  | FALSE | 0.002194  | 0.006854 | 1 | 1  | 1  | P62304     | Small nuclear ri   | 1 | 1751.96673 | 133169  | 182769.6 | 15.25  | 62.34  |
| FALSE | High | IQVRLGEHNIDVLEGNEQFIN/     | TRUE  | 0.15126   | 0.006854 | 1 | 1  | 1  | cRAP112    | Trypsin OS=Sus     | 1 | 2707.4162  | 112527  |          | 39.29  |        |
| FALSE | High | LSAKPAPPKPEPRPK            | FALSE | 0.163014  | 0.006854 | 1 | 1  | 1  | O00479     | High mobility gr   | 0 | 1612.95334 | 45489   |          | 55.7   |        |
| FALSE | High | ISGLIYEETR                 | FALSE | 0.0016591 | 0.006854 | 1 | 1  | 2  | P62805     | Histone H4 OS=     | 0 | 1180.62083 | 185311  | 7845.3   | 15.46  | 108.96 |
| FALSE | High | LVAASQAALGL                | TRUE  | 0.0073214 | 0.006854 | 1 | 1  | 1  | P02768     | Serum albumin (    | 0 | 1013.59897 |         |          |        |        |
| FALSE | High | LVREIAQDFKTDLR             | FALSE | 0.0720589 | 0.006854 | 1 | 3  | 1  | P84243     | Histone H3.3 OS    | 2 | 1703.94389 |         |          |        |        |
| FALSE | High | LVSDLK 1xLabel:13C(€       | FALSE | 0.213174  | 0.006854 | 1 | 1  | 1  | Q15528     | Mediator of RN/    | 0 | 680.42845  |         | 309728.3 |        | 67.06  |

|       |      |                            |       |           |          |   |    |    |           |                            |   |            |          |          |        |       |
|-------|------|----------------------------|-------|-----------|----------|---|----|----|-----------|----------------------------|---|------------|----------|----------|--------|-------|
| FALSE | High | MVFTSSADGC 1xCarbamidoi    | TRUE  | 1.90E-06  | 0.006854 | 1 | 1  | 12 | sp        | cRAP117 00000(sp           | 0 | 2691.23889 | 20475620 | 19905.4  | 29.95  |       |
| FALSE | High | MVFTSSADGC 1xCarbamidoi    | TRUE  | 8.45E-06  | 0.006854 | 1 | 1  | 9  | sp        | cRAP117 00000(sp           | 0 | 2707.23381 | 494768   | 76106.5  | 28.22  | 54.26 |
| FALSE | High | NDYFSDFGVYSQISR            | TRUE  | 5.21E-05  | 0.006854 | 1 | 1  | 3  | sp        | cRAP117 00000(sp           | 0 | 1884.83988 | 1924722  |          | 40.08  |       |
| FALSE | High | NLCNIPCSALL 3xCarbamidoi   | TRUE  | 7.67E-05  | 0.006854 | 1 | 1  | 2  | cRAP078   | Lysozyme C OS= cRAP078     | 0 | 2508.18911 | 431405   | 11727.5  | 54.47  |       |
| FALSE | High | NLCNIPCSALL 3xCarbamidoi   | TRUE  | 0.133844  | 0.006854 | 1 | 1  | 1  | cRAP078   | Lysozyme C OS= cRAP078     | 1 | 2636.28407 | 80137    |          |        |       |
| FALSE | High | NLQTVNVVDEN                | FALSE | 0.189612  | 0.006854 | 1 | 1  | 1  | P62899    | 60S ribosomal p1P62899     | 0 | 1145.54331 |          |          |        |       |
| FALSE | High | NTDGSTDYGILQINSR           | TRUE  | 0.0002206 | 0.006854 | 1 | 1  | 3  | cRAP078   | Lysozyme C OS= cRAP078     | 0 | 1753.83513 | 393517   |          | 51.14  |       |
| FALSE | High | NVQALEIELQSQLALK           | TRUE  | 0.00024   | 0.006854 | 1 | 1  | 4  | P13645    | Keratin, type I c P13645   | 0 | 1797.01164 | 153442   | 5233.2   | 75.72  | 38.02 |
| FALSE | High | QVHPDTGISSK                | FALSE | 0.0207395 | 0.006854 | 2 | 15 | 1  | Q16778; C | Histone H2B typ Q16778; C  | 0 | 1168.59568 | 409722   | 63697.3  | 61.69  | 66.68 |
| FALSE | High | RDTLLLELK                  | TRUE  | 0.0037499 | 0.006854 | 1 | 1  | 5  | sp        | cRAP117 00000(sp           | 1 | 1100.66739 | 2377187  |          | 77.52  |       |
| FALSE | High | RDTLLLELKR                 | TRUE  | 0.0025966 | 0.006854 | 1 | 1  | 7  | sp        | cRAP117 00000(sp           | 2 | 1256.7685  | 1705324  |          | 86.79  |       |
| FALSE | High | RGDLPFVPPRR                | FALSE | 0.138765  | 0.006854 | 1 | 1  | 2  | P35579    | Myosin-9 OS=Hc P35579      | 2 | 1311.76441 | 50161    |          | 48.45  |       |
| FALSE | High | RHPYFYAPELFFAKR            | TRUE  | 0.0108419 | 0.006854 | 1 | 1  | 2  | P02768    | Serum albumin (P02768      | 2 | 2055.09631 | 72454    |          |        |       |
| FALSE | High | RKASGPPVSELITK             | FALSE | 0.0223667 | 0.006854 | 1 | 2  | 1  | P10412    | Histone H1.4 OS P16402; P  | 2 | 1482.86385 | 91270    | 19747.5  | 55.61  | 47.29 |
| FALSE | High | RKPDTIEVQQI 1xOxidation [I | FALSE | 0.0011576 | 0.006854 | 1 | 3  | 3  | P35241    | Radixin OS=Hom P35241; P   | 1 | 1488.78389 | 64871    |          | 87.2   |       |
| FALSE | High | RKPDTIEVQQMKAQAR           | FALSE | 0.180568  | 0.006854 | 1 | 3  | 1  | P35241    | Radixin OS=Hom P35241; P   | 2 | 1899.02289 | 41218    |          | 18.49  |       |
| FALSE | High | RTPPAGVFYQGW SATPIANG'     | TRUE  | 0.0152044 | 0.006854 | 1 | 1  | 4  | sp        | cRAP117 00000(sp           | 1 | 3239.62457 | 1593495  | 10592.4  | 37.27  | 17.82 |
| FALSE | High | RTPPAGVFYQGW SATPIANG'     | TRUE  | 0.0003348 | 0.006854 | 1 | 1  | 8  | sp        | cRAP117 00000(sp           | 2 | 3610.80506 | 21548810 |          | 37.09  |       |
| FALSE | High | RVTIMPK                    | FALSE | 0.0398971 | 0.006854 | 1 | 5  | 2  | P84243    | Histone H3.3 OS P84243; C  | 1 | 844.50732  | 1085997  | 196631.5 | 58.49  | 56.41 |
| FALSE | High | RVTIMPKDIQLAR              | FALSE | 0.149644  | 0.006854 | 1 | 5  | 1  | P84243    | Histone H3.3 OS P84243; C  | 2 | 1540.89919 | 586693   | 148745.7 | 87.68  | 77.29 |
| FALSE | High | RVTIMPKDIQI 1xOxidation [I | FALSE | 0.0201218 | 0.006854 | 1 | 5  | 1  | P84243    | Histone H3.3 OS P84243; C  | 2 | 1556.89411 | 170693   | 30635.3  | 72.39  | 60.41 |
| FALSE | High | SAHSIAQLQK                 | FALSE | 0.0717932 | 0.006854 | 1 | 1  | 1  | Q9ULS5    | Transmembrane Q9ULS5       | 0 | 1082.59528 | 5427     |          | 4.29   |       |
| FALSE | High | SCQAQPTTM/ 1xCarbamidoi    | TRUE  | 0.0032797 | 0.006854 | 1 | 1  | 2  | cRAP016   | Kappa-casein OS cRAP016    | 0 | 1250.56162 | 72070    |          | 90.65  |       |
| FALSE | High | SGGGGGGGF 1xCarbamidoi     | FALSE | 0.0279361 | 0.006854 | 1 | 1  | 1  | P13647    | Keratin, type II c P13647  | 1 | 2257.05269 | 26416    | 4687.2   | 62.93  | 83.86 |
| FALSE | High | SGGGGGRFSS 1xCarbamidoi    | TRUE  | 0.0297804 | 0.006854 | 1 | 1  | 1  | P04264    | Keratin, type II c P04264  | 2 | 3149.45658 | 20735    |          | 25.64  |       |
| FALSE | High | SGVSLAALKKALAAAGYDVEK      | FALSE | 0.0372982 | 0.006854 | 1 | 3  | 1  | P10412    | Histone H1.4 OS P16402; P  | 2 | 2062.15428 | 65407    | 17325.8  |        |       |
| FALSE | High | SLDLSIIAEVK                | TRUE  | 0.0637766 | 0.006854 | 1 | 1  | 2  | P04264    | Keratin, type II c P04264  | 0 | 1302.71512 | 7300     |          | 103.43 |       |
| FALSE | High | SIRDTPAKNAC 3xLabel:13C(€  | FALSE | 0.0535668 | 0.006854 | 1 | 1  | 2  | P06748    | Nucleophosmin P06748       | 2 | 1346.78847 | 32288    | 140792.4 | 74.18  | 59.73 |
| FALSE | High | SPAQLQWQV 1xCarbamidoi     | TRUE  | 0.141288  | 0.006854 | 1 | 1  | 1  | cRAP016   | Kappa-casein OS cRAP016    | 1 | 3211.63506 |          |          |        |       |
| FALSE | High | SSLLEKGLDGAK               | FALSE | 0.168891  | 0.006854 | 1 | 1  | 2  | P81605    | Dermcidin OS=H P81605      | 1 | 1217.67359 | 325464   |          | 87.2   |       |
| FALSE | High | SSLLEKGLDGAKK              | FALSE | 0.0433158 | 0.006854 | 1 | 1  | 1  | P81605    | Dermcidin OS=H P81605      | 2 | 1345.76856 | 26192    |          | 54.78  |       |
| FALSE | High | SSSSGSVGESSSKGPR           | TRUE  | 0.222795  | 0.006854 | 1 | 1  | 1  | P13645    | Keratin, type I c P13645   | 1 | 1495.6983  |          |          |        |       |
| FALSE | High | STELLIR                    | FALSE | 0.0433158 | 0.006854 | 1 | 5  | 1  | P84243    | Histone H3.3 OS P84243; C  | 0 | 831.49344  | 1534981  | 133888.6 | 30.84  | 48.00 |
| FALSE | High | STITSREIQTAVRLLLLPGELAK    | FALSE | 0.161861  | 0.006854 | 1 | 13 | 2  | Q16778    | Histone H2B typ Q16778; C  | 2 | 2396.38713 | 250218   | 76890.5  | 116.94 | 92.37 |
| FALSE | High | STSSFCLSR 1xCarbamidoi     | TRUE  | 0.0442971 | 0.006854 | 1 | 1  | 2  | P35908    | Keratin, type II c P35908  | 0 | 1131.5099  | 305723   |          | 46.78  |       |
| FALSE | High | SYELPDGQVITIGNER           | FALSE | 0.0022279 | 0.006854 | 1 | 10 | 2  | P60709    | Actin, cytoplasm A5A3E0; P | 0 | 1790.89192 | 90747    |          | 42.84  |       |
| FALSE | High | THNLEPYFESFINNLR           | TRUE  | 0.0560101 | 0.006854 | 1 | 1  | 1  | P04264    | Keratin, type II c P04264  | 0 | 1993.97665 | 18590    |          | 64.23  |       |
| FALSE | High | TIGISVDPR                  | FALSE | 0.0212953 | 0.006854 | 1 | 1  | 1  | P26373    | 60S ribosomal p1P26373     | 0 | 957.53637  | 36001    |          | 43.47  |       |
| FALSE | High | TLNDMRQEYEQLIAK            | TRUE  | 0.0371588 | 0.006854 | 1 | 1  | 1  | P35527    | Keratin, type I c P35527   | 1 | 1851.92692 | 38416    |          |        |       |
| FALSE | High | TLTSGGHAEH 2xCarbamidoi    | FALSE | 0.125847  | 0.006854 | 1 | 1  | 1  | P50238    | Cysteine-rich prc P50238   | 0 | 3117.3764  | 46790    | 12042.4  | 112.87 |       |
| FALSE | High | TPGSRNLCNIF 3xCarbamidoi   | TRUE  | 0.103719  | 0.006854 | 1 | 1  | 1  | cRAP078   | Lysozyme C OS= cRAP078     | 1 | 3006.44415 | 60354    |          |        |       |
| FALSE | High | TPPAGVFYQGW SATPIANGSI     | TRUE  | 0.0398971 | 0.006854 | 1 | 1  | 2  | sp        | cRAP117 00000(sp           | 0 | 3083.52346 | 622322   |          | 51.06  |       |

|       |      |                            |       |           |          |   |    |   |         |                            |   |            |          |         |        |       |
|-------|------|----------------------------|-------|-----------|----------|---|----|---|---------|----------------------------|---|------------|----------|---------|--------|-------|
| FALSE | High | TPPAGVFYQGWSATPIANGSI      | TRUE  | 0.0205057 | 0.006854 | 1 | 1  | 4 | sp      | cRAP117 00000(sp           | 1 | 3454.70394 | 1136332  |         | 58.02  |       |
| FALSE | High | TPPAGVFYQGWSATPIANGSI      | TRUE  | 0.0252357 | 0.006854 | 1 | 1  | 5 | sp      | cRAP117 00000(sp           | 2 | 3582.79891 | 1269281  |         | 58.18  |       |
| FALSE | High | TVTAMDVVYALK               | FALSE | 0.0218657 | 0.006854 | 1 | 1  | 1 | P62805  | Histone H4 OS=H P62805     | 0 | 1310.70245 | 132445   | 34616.5 | 18.23  |       |
| FALSE | High | TVTAMDVVYALKR              | FALSE | 0.0321038 | 0.006854 | 1 | 1  | 2 | P62805  | Histone H4 OS=H P62805     | 1 | 1466.80356 | 38727    | 26423.3 | 47.04  | 19.76 |
| FALSE | High | VATVSLPR                   | TRUE  | 0.0217833 | 0.006854 | 1 | 1  | 4 | cRAP112 | Trypsin OS=Sus s cRAP112   | 0 | 842.50943  | 21581588 |         | 30.71  |       |
| FALSE | High | VERADGYEPP 1xLabel:13C(€   | FALSE | 0.134815  | 0.006854 | 1 | 1  | 1 | P61247  | 40S ribosomal p P61247     | 1 | 1680.81708 | 115304   | 98579.9 | 85.29  | 67.77 |
| FALSE | High | VTIAQGGVLPNIQAVLLPK        | FALSE | 0.0128167 | 0.006854 | 1 | 10 | 4 | Q16777  | Histone H2A typ Q16777; C  | 0 | 1931.16881 | 244625   | 39166.4 | 115.61 | 98.71 |
| FALSE | High | VTIAQGGVLPNIQAVLLPKK       | FALSE | 0.02358   | 0.006854 | 1 | 10 | 1 | Q16777  | Histone H2A typ Q16777; C  | 1 | 2059.26377 | 53372    |         | 36.17  |       |
| FALSE | High | VTIMPKDIQLAR               | FALSE | 0.179307  | 0.006854 | 1 | 5  | 1 | P84243  | Histone H3.3 OS P84243; C  | 1 | 1384.79808 | 7734     |         | 88.88  |       |
| FALSE | High | VTIMPKDIQLA 1xOxidation [I | FALSE | 0.129553  | 0.006854 | 1 | 5  | 1 | P84243  | Histone H3.3 OS P84243; C  | 1 | 1400.793   | 78275    | 10603.1 | 88.37  | 84.07 |
| FALSE | High | WVGDLPNGR 1xCarbamidoi     | FALSE | 0.0456394 | 0.006854 | 1 | 1  | 2 | Q96DR8  | Mucin-like prote Q96DR8    | 1 | 1369.66813 | 69435    |         | 61.15  |       |
| FALSE | High | YADLTEDQLP 1xCarbamidoi    | FALSE | 0.0438037 | 0.006854 | 1 | 1  | 1 | P18669  | Phosphoglycerat P18669     | 1 | 2437.1954  |          |         |        |       |
| FALSE | High | YALYDATYETK                | FALSE | 0.0015907 | 0.006854 | 1 | 2  | 2 | P23528  | Cofilin-1 OS=Hor P23528; C | 0 | 1337.62597 | 140032   | 37581.3 | 60.32  | 54.83 |
| FALSE | High | YEKDIAAYR                  | FALSE | 0.0110923 | 0.006854 | 1 | 2  | 2 | P26583  | High mobility gr P26583; P | 1 | 1128.5684  | 399365   | 3144.5  | 68.84  |       |
| FALSE | High | YICDNQDTISS 1xCarbamidoi   | TRUE  | 0.0003102 | 0.006854 | 1 | 1  | 1 | cRAP087 | Serum albumin (cRAP087     | 0 | 1443.64203 | 20696    |         | 94.91  |       |
| FALSE | High | YLGYLEQLLR                 | TRUE  | 0.007238  | 0.006854 | 1 | 1  | 2 | cRAP013 | Alpha-S1-casein cRAP013    | 0 | 1267.7045  | 44967    | 14635.8 | 96.97  | 77.53 |
| FALSE | High | YRPGTVALR                  | FALSE | 0.224306  | 0.006854 | 1 | 5  | 2 | P84243  | Histone H3.3 OS P84243; C  | 0 | 1032.59489 | 162184   | 19325.8 | 40.38  | 37.11 |
| FALSE | High | YRPGTVALREI 3xLabel:13C(€  | FALSE | 0.114481  | 0.006854 | 1 | 5  | 1 | P84243  | Histone H3.3 OS P84243; C  | 1 | 1448.88304 | 167531   | 8276.1  | 34.44  | 70.35 |
| FALSE | High | YSQGNVSAVGVTYDGH TALT I    | TRUE  | 0.0512279 | 0.006854 | 1 | 1  | 2 | sp      | cRAP117 00000(sp           | 0 | 2196.06798 | 1345676  | 7148.6  | 56.04  | 3.98  |



| Abundance | Abundance | Abundance | Abundance | Abundance | Abundance | Precursor | Quantity          | Info    | Classification | Found  | Found  | Found  | Found  | Found  | Found | Confidence | Percolator q | Percolator P | XCorr  | Top | Apex | RT in min |
|-----------|-----------|-----------|-----------|-----------|-----------|-----------|-------------------|---------|----------------|--------|--------|--------|--------|--------|-------|------------|--------------|--------------|--------|-----|------|-----------|
| 131147    | 20021     | 12433     | 5540      |           |           | 1         |                   | Light   | High           | Peak F | Peak F | Peak F | Not F  | Not F  | High  | 0.008403   | 0.013350     | 3.84         | 66.16  |     |      |           |
| 416383    | 222224    | 112660    | 103472    | 55270     | 39419     | 2         |                   | Heavy   | Peak F         | Peak F | Peak F | High   | Peak F | High   | High  | 0.008403   | 0.031020     | 3.1          | 64     |     |      |           |
| 64110     | 40998     | 20062     |           | 5349      |           | 3         |                   | Light   | Peak F         | High   | Peak F | Not F  | Peak F | Not F  | High  | 0.009259   | 0.164900     | 3.39         | 139.93 |     |      |           |
| 2714467   | 3938081   | 1124488   | 503862    | 557639    | 211506    | 4         | NotUnique         | Light   | Peak F         | High   | Peak F | Peak F | Peak F | Peak F | High  | 0.009259   | 0.023860     | 3.13         | 122.24 |     |      |           |
| 285714    | 777584    | 200126    | 57371     | 75814     | 43269     | 5         |                   | Light   | High           | Peak F | Peak F | Peak F | Peak F | Peak F | High  | 0.008403   | 0.185400     | 2.51         | 94.63  |     |      |           |
| 6227066   | 7836148   | 4187765   |           |           |           | 6         |                   | Light   | High           | High   | High   | Not F  | Not F  | Not F  | High  | 0.008403   | 0.000196     | 6.34         | 113.99 |     |      |           |
| 8662712   | 20929875  | 6206443   |           |           |           | 7         |                   | Light   | High           | High   | High   | Not F  | Not F  | Not F  | High  | 0.009259   | 0.000061     | 6.5          | 139.94 |     |      |           |
| 9545468   | 4929521   | 3751901   |           |           |           | 8         |                   | Light   | Peak F         | High   | Peak F | Not F  | Not F  | Not F  | High  | 0.009259   | 0.159400     | 2.37         | 116.55 |     |      |           |
| 100211    | 129126    | 23246     | 49848     | 40339     | 11652     | 9         |                   | Light   | Peak F         | High   | Peak F | Peak F | Peak F | Peak F | High  | 0.009259   | 0.041590     | 2.51         | 73.16  |     |      |           |
| 123953    | 348765    | 89028     |           | 71991     | 17115     | 10        | NotUnique         | Light   | High           | High   | Peak F | Not F  | Peak F | Peak F | High  | 0.008403   | 0.029480     | 4.22         | 205.02 |     |      |           |
| 273366    | 625788    | 128432    | 61015     | 99925     | 30798     | 11        | NotUnique         | Light   | High           | Peak F | High   | Peak F | Peak F | Peak F | High  | 0.008403   | 0.011000     | 4.96         | 178.85 |     |      |           |
|           |           |           |           |           |           | 11        | Redundant         | Heavy   | Peak F         | Peak F | Peak F | Peak F | High   | Peak F | High  | 0.009259   | 0.136200     | 4.68         | 178.98 |     |      |           |
| 189156    | 302699    | 75620     | 61568     | 61808     | 25812     | 12        |                   | Heavy   | Peak F         | Peak F | Peak F | High   | High   | Peak F | High  | 0.008403   | 0.093700     | 2.4          | 117.49 |     |      |           |
| 13358     | 47495     | 27457     | 7366      | 18813     | 15832     | 13        | NotUnique         | Light   | Peak F         | High   | Peak F | Peak F | Peak F | Peak F | High  | 0.009259   | 0.150500     | 3.03         | 12.95  |     |      |           |
| 34516     | 23855     | 26805     | 10864     | 4284      | 8365      | 14        | NotUnique         | Light   | Peak F         | High   | Peak F | Peak F | Peak F | Peak F | High  | 0.009259   | 0.078640     | 2.24         | 21.3   |     |      |           |
| 10900042  | 8481269   | 4715281   |           |           |           | 15        |                   | Light   | High           | High   | High   | Not F  | Not F  | Not F  | High  | 0.008403   | 0.008673     | 3.64         | 62.25  |     |      |           |
| 45372     | 561857    | 313438    |           |           |           | 16        |                   | Light   | Peak F         | High   | High   | Not F  | Not F  | Not F  | High  | 0.009259   | 0.016490     | 5.8          | 200.54 |     |      |           |
|           |           |           |           |           |           | 17        | NoQuant           | Light   | High           | Not F  | Not F  | Not F  | Not F  | Not F  | High  | 0.008403   | 0.199300     | 3.04         |        |     |      |           |
| 180220    | 96483     | 53876     |           |           |           | 18        |                   | Light   | Peak F         | High   | High   | Not F  | Not F  | Not F  | High  | 0.009259   | 0.059760     | 2.76         | 62.16  |     |      |           |
| 788402    | 242991    | 88355     | 63342     | 31873     | 13918     | 19        |                   | Light   | High           | High   | High   | Peak F | Peak F | Peak F | High  | 0.008403   | 0.010090     | 3.01         | 69.55  |     |      |           |
| 82032     | 15630     | 5736      | 5005      |           |           | 20        |                   | Light   | High           | Peak F | Peak F | Peak F | Not F  | Not F  | High  | 0.008403   | 0.029440     | 3.69         | 118.44 |     |      |           |
| 209316    | 50083     | 35280     |           |           |           | 21        |                   | Light   | Peak F         | High   | Peak F | Not F  | Not F  | Not F  | High  | 0.009259   | 0.025180     | 3.29         | 50.67  |     |      |           |
| 138686    | 190650    | 87068     |           |           |           | 22        |                   | Light   | High           | High   | High   | Not F  | Not F  | Not F  | High  | 0.009259   | 0.001062     | 7.44         | 123.03 |     |      |           |
|           |           |           |           |           |           | 23        | Indistinguishable | Light   | Not F          | Not F  | Not F  | Not F  | Not F  | Not F  | High  | 0.008403   | 0.140200     | 2.36         | 81.13  |     |      |           |
| 135202    | 55957     | 10578     | 82451     | 44594     |           | 23        |                   | Light   | High           | Peak F | Peak F | Peak F | Peak F | Not F  | High  | 0.008403   | 0.113800     | 2.05         | 174.68 |     |      |           |
|           |           |           |           |           |           | 23        | Redundant         | Heavy   | Peak F         | Peak F | Peak F | High   | High   | Not F  | High  | 0.008403   | 0.082590     | 2.42         | 174.68 |     |      |           |
| 47426     | 55081     | 17960     |           |           |           | 24        |                   | Light   | High           | Peak F | Peak F | Not F  | Not F  | Not F  | High  | 0.008403   | 0.090260     | 2.72         | 91.45  |     |      |           |
|           |           |           |           |           |           | 24        | Inconsistently    | Labeled | Not F          | Not F  | Not F  | Not F  | Not F  | Not F  | High  | 0.009259   | 0.180000     | 2.26         | 166.98 |     |      |           |
| 1385639   | 5690543   | 692908    | 377343    | 1033143   | 40429     | 25        |                   | Light   | Peak F         | High   | High   | Peak F | Peak F | Peak F | High  | 0.009259   | 0.024520     | 3.13         | 171.74 |     |      |           |
| 53799     | 200947    | 27954     | 34404     | 26141     | 19912     | 26        |                   | Light   | High           | Peak F | Peak F | Peak F | Peak F | Peak F | High  | 0.008403   | 0.085850     | 3.15         | 162.91 |     |      |           |
| 168258    | 174210    | 65358     |           |           |           | 27        |                   | Light   | High           | Peak F | Peak F | Not F  | Not F  | Not F  | High  | 0.008403   | 0.089190     | 2.66         | 208.24 |     |      |           |
| 313989    | 313634    | 116116    |           |           |           | 28        |                   | Light   | Peak F         | High   | Peak F | Not F  | Not F  | Not F  | High  | 0.009259   | 0.035300     | 3.08         | 181.24 |     |      |           |
| 677341    | 531843    | 248219    |           |           |           | 29        |                   | Light   | High           | High   | High   | Not F  | Not F  | Not F  | High  | 0.008403   | 0.000424     | 5.59         | 111.32 |     |      |           |
| 68079     | 18525     | 14575     |           |           |           | 30        |                   | Light   | High           | Peak F | Peak F | Not F  | Not F  | Not F  | High  | 0.008403   | 0.009235     | 3.33         | 50.47  |     |      |           |
|           |           |           | 107449    |           | 4557      | 31        |                   | Light   | High           | Not F  | Not F  | Peak F | Not F  | Not F  | High  | 0.008403   | 0.247000     | 2.6          | 147.09 |     |      |           |
| 156044    |           |           | 16501     |           |           | 32        |                   | Light   | High           | Not F  | Not F  | Peak F | Not F  | Not F  | High  | 0.008403   | 0.040940     | 3.24         | 177.91 |     |      |           |
| 14492     | 36919     | 84898     |           |           |           | 33        |                   | Light   | High           | Peak F | Peak F | Not F  | Not F  | Not F  | High  | 0.008403   | 0.247000     | 9.42         | 216.39 |     |      |           |
| 578775    | 344903    | 130493    |           |           |           | 34        |                   | Light   | High           | Peak F | High   | Not F  | Not F  | Not F  | High  | 0.008403   | 0.000679     | 5.03         | 104.85 |     |      |           |
| 4785959   | 2521634   | 954559    |           |           |           | 35        |                   | Light   | High           | High   | High   | Not F  | Not F  | Not F  | High  | 0.009259   | 0.000677     | 7.12         | 186.96 |     |      |           |
| 22340     | 7005      | 7006      |           |           |           | 36        |                   | Light   | High           | Peak F | Peak F | Not F  | Not F  | Not F  | High  | 0.008403   | 0.000190     | 8.7          | 78.31  |     |      |           |

|         |         |         |        |        |        |    |                     |        |        |        |        |        |        |        |        |        |        |          |          |          |        |       |  |
|---------|---------|---------|--------|--------|--------|----|---------------------|--------|--------|--------|--------|--------|--------|--------|--------|--------|--------|----------|----------|----------|--------|-------|--|
|         |         |         |        |        |        | 37 | NoQuanV: Light      | High   | Not Fo | Not Fo | Not Fo | Not Fo | Not Fo | Not Fo | Not Fo | Not Fo | High   | 0.008403 | 0.000121 | 5.77     |        |       |  |
| 708358  | 429455  | 66048   |        |        |        | 38 | Light               | High   | High   | High   | Not Fo | Not Fo | Not Fo | Not Fo | Not Fo | Not Fo | High   | 0.008403 | 0.004315 | 4.56     | 45.26  |       |  |
| 314657  | 258308  | 142989  | 11214  |        | 4611   | 39 | Light               | High   | Peak F | High   | Peak F | Not Fo | Not Fo | Not Fo | Not Fo | Not Fo | High   | 0.008403 | 0.000355 | 5.99     | 140.92 |       |  |
| 81249   | 38311   | 23559   |        |        |        | 40 | Light               | Peak F | High   | Peak F | Not Fo | Not Fo | Not Fo | Not Fo | Not Fo | Not Fo | High   | 0.009259 | 0.039910 | 4.09     | 157.34 |       |  |
| 219009  | 122815  | 68264   |        |        |        | 41 | Light               | Peak F | High   | Peak F | Not Fo | Not Fo | Not Fo | Not Fo | Not Fo | Not Fo | High   | 0.009259 | 0.054750 | 3.01     | 122.96 |       |  |
| 25552   | 483616  | 52445   | 28816  | 361704 | 48798  | 42 | NotUniqui           | Heavy  | Peak F | Peak F | Peak F | Peak F | High   | Peak F | High   | Peak F | High   | 0.009259 | 0.128500 | 1.04     | 38.34  |       |  |
| 148056  | 78526   | 33518   |        |        |        | 43 | Light               | High   | Peak F | Peak F | Peak F | Not Fo | Not Fo | Not Fo | Not Fo | Not Fo | High   | 0.008403 | 0.012180 | 4.25     | 147.85 |       |  |
| 2790909 | 2027029 | 618584  | 655797 | 377090 | 143081 | 44 | NoQuanV: Light      | High   | High   | High   | Not Fo | Not Fo | Not Fo | Not Fo | Not Fo | Not Fo | High   | 0.008403 | 0.095850 | 2.2      |        |       |  |
| 801608  | 2958246 | 567347  | 322531 | 611066 | 182713 | 45 | NotUniqui           | Light  | High   | Peak F | High   | Peak F | Peak F | Peak F | Peak F | Peak F | High   | 0.008403 | 0.009605 | 4.01     | 24.59  |       |  |
|         |         |         |        |        |        | 46 | NotUniqui           | Light  | High   | High   | High   | Peak F | Peak F | Peak F | Peak F | Peak F | High   | 0.008403 | 0.003513 | 5.66     | 54.45  |       |  |
| 256435  | 99002   | 39028   |        |        |        | 46 | Redundan            | Heavy  | Peak F | Peak F | Peak F | High   | High   | High   | High   | High   | High   | 0.009259 | 0.018160 | 4.75     | 54.45  |       |  |
|         |         |         |        |        |        | 47 | Light               | High   | High   | Peak F | Not Fo | Not Fo | Not Fo | Not Fo | Not Fo | Not Fo | High   | 0.009259 | 0.068890 | 3.12     | 142.13 |       |  |
| 29334   | 10911   | 5358    |        |        |        | 48 | NoQuanV: Light      | Not Fo | High   | Not Fo | Not Fo | Not Fo | Not Fo | Not Fo | Not Fo | Not Fo | High   | 0.009259 | 0.086910 | 5        |        |       |  |
|         |         |         |        |        |        | 49 | Light               | High   | Peak F | Peak F | Not Fo | Not Fo | Not Fo | Not Fo | Not Fo | Not Fo | High   | 0.008403 | 0.103000 | 3.1      | 145    |       |  |
| 34427   | 90445   | 26638   | 53721  | 172209 | 42856  | 50 | NoQuanV: Light      | High   | Not Fo | Not Fo | Not Fo | Not Fo | Not Fo | Not Fo | Not Fo | Not Fo | High   | 0.008403 | 0.018210 | 3.7      |        |       |  |
| 66307   |         |         | 48408  |        | 11092  | 51 | Heavy               | Peak F | Peak F | Peak F | Peak F | High   | High   | High   | High   | High   | High   | 0.009259 | 0.072200 | 3.85     | 95.66  |       |  |
| 79944   | 73116   | 62721   |        |        |        | 52 | Heavy               | Peak F | Not Fo | Not Fo | Not Fo | High   | Not Fo | Not Fo | Peak F | High   | High   | 0.008403 | 0.010490 | 4.5      | 101.66 |       |  |
| 78328   | 90980   | 36523   | 7475   |        | 2657   | 53 | Light               | High   | Peak F | High   | Not Fo | Not Fo | Not Fo | Not Fo | Not Fo | Not Fo | High   | 0.008403 | 0.035260 | 2.92     | 144.77 |       |  |
| 75131   | 160719  | 37417   | 18065  | 28751  | 10143  | 54 | Light               | High   | Peak F | Peak F | Peak F | Not Fo | Not Fo | Not Fo | Not Fo | Not Fo | High   | 0.008403 | 0.150100 | 2.02     | 72.88  |       |  |
| 79489   | 36298   | 20395   |        |        |        | 55 | Light               | Peak F | High   | High   | Peak F | Peak F | Peak F | Peak F | Peak F | Peak F | High   | 0.009259 | 0.010050 | 4.15     | 135.17 |       |  |
| 2193594 | 1164605 | 462250  |        |        |        | 56 | NotUniqui           | Light  | High   | High   | Peak F | Not Fo | Not Fo | Not Fo | Not Fo | Not Fo | High   | 0.008403 | 0.014480 | 3.52     | 118.13 |       |  |
| 10582   | 9956    | 18832   |        |        |        | 57 | Light               | High   | High   | High   | Not Fo | Not Fo | Not Fo | Not Fo | Not Fo | Not Fo | High   | 0.008403 | 0.000025 | 6.67     | 103.03 |       |  |
| 7819909 | 7712058 | 4292076 |        |        |        | 58 | Light               | High   | Peak F | High   | Not Fo | Not Fo | Not Fo | Not Fo | Not Fo | Not Fo | High   | 0.008403 | 0.029480 | 3.26     | 173.15 |       |  |
| 242427  | 234457  | 88180   | 43744  | 46845  | 23977  | 59 | Light               | High   | High   | High   | Not Fo | Not Fo | Not Fo | Not Fo | Not Fo | Not Fo | High   | 0.008403 | 0.000057 | 6.35     | 151.39 |       |  |
|         |         |         |        |        |        | 60 | Heavy               | Peak F | Peak F | Peak F | High   | High   | Peak F | High   | Peak F | High   | High   | 0.009259 | 0.015360 | 3.65     | 150.8  |       |  |
| 276482  | 293969  | 210148  |        |        |        | 61 | NoQuanV: Light      | High   | Not Fo | Not Fo | Not Fo | Not Fo | Not Fo | Not Fo | Not Fo | Not Fo | High   | 0.008403 | 0.060990 | 2.13     |        |       |  |
| 46650   | 13775   | 7853    |        |        |        | 62 | Light               | High   | Peak F | Peak F | Not Fo | Not Fo | Not Fo | Not Fo | Not Fo | Not Fo | High   | 0.008403 | 0.171400 | 2.31     | 13.27  |       |  |
| 130234  | 60850   | 12546   | 268225 | 130164 | 45178  | 63 | Light               | High   | Peak F | Peak F | Not Fo | Not Fo | Not Fo | Not Fo | Not Fo | Not Fo | High   | 0.008403 | 0.054270 | 2.79     | 59.65  |       |  |
|         |         |         |        |        |        | 64 | Light               | High   | Peak F | Peak F | Peak F | Peak F | Peak F | Peak F | Peak F | Peak F | High   | 0.008403 | 0.023660 | 2.87     | 140.77 |       |  |
| 955794  | 852848  | 754764  |        |        |        | 65 | NoQuanV: Heavy      | Peak F | Peak F | Peak F | Peak F | High   | Peak F | High   | Peak F | High   | High   | 0.009259 | 0.169800 | 2.07     | 136.7  |       |  |
| 131618  | 252180  | 86351   | 17218  | 21065  | 9551   | 66 | NotUniqui           | Light  | High   | High   | Peak F | Peak F | Peak F | Peak F | Peak F | Peak F | High   | 0.009259 | 0.094670 | 2.22     | 136.7  |       |  |
| 3407499 | 5916807 | 1660899 | 11572  |        | 12133  | 67 | Light               | High   | Peak F | High   | Peak F | Peak F | Peak F | Peak F | Peak F | Peak F | High   | 0.008403 | 0.082730 | 2.43     | 37.97  |       |  |
| 1019261 | 1207273 | 316331  |        |        |        | 68 | Light               | High   | High   | High   | Peak F | Not Fo | Not Fo | Not Fo | Not Fo | Not Fo | High   | 0.009259 | 0.003908 | 4.92     | 170.08 |       |  |
|         | 72974   | 44183   |        |        |        | 69 | Light               | High   | High   | High   | Not Fo | Not Fo | Not Fo | Not Fo | Not Fo | Not Fo | High   | 0.008403 | 0.000668 | 4.5      | 161.67 |       |  |
| 119507  | 148393  |         | 182770 | 253721 | 53087  | 70 | Light               | Not Fo | High   | Peak F | Not Fo | Not Fo | Not Fo | Not Fo | Not Fo | Not Fo | High   | 0.009259 | 0.008847 | 4.4      | 187.17 |       |  |
| 209319  | 110152  | 112527  |        |        |        | 71 | Heavy               | Peak F | Peak F | Not Fo | High   | Peak F | Peak F | Peak F | Peak F | Peak F | High   | 0.008403 | 0.012340 | 3.38     | 167.62 |       |  |
| 71477   | 45489   | 20455   |        |        |        | 72 | Light               | Peak F | High   | Peak F | Not Fo | Not Fo | Not Fo | Not Fo | Not Fo | Not Fo | High   | 0.009259 | 0.126400 | 2.23     | 160.97 |       |  |
| 229328  | 185311  | 171474  | 21788  |        | 2825   | 73 | Light               | Peak F | High   | Peak F | Not Fo | Not Fo | Not Fo | Not Fo | Not Fo | Not Fo | High   | 0.009259 | 0.134500 | 2.48     | 45.15  |       |  |
|         |         |         |        |        |        | 74 | Light               | High   | Peak F | High   | Peak F | Not Fo | Not Fo | Not Fo | Not Fo | Not Fo | High   | 0.008403 | 0.010330 | 3.58     | 115.23 |       |  |
|         |         |         |        |        |        |    | IndistinguishableCl | Not Fo | Not Fo | Not Fo | Not Fo | Not Fo | Not Fo | Not Fo | Not Fo | Not Fo | Not Fo | High     | 0.008403 | 0.026600 | 3.33   | 155.7 |  |
|         |         |         | 893608 | 309728 | 307566 | 75 | NoQuanV: Light      | High   | Not Fo | Not Fo | Not Fo | Not Fo | Not Fo | Not Fo | Not Fo | Not Fo | Not Fo | High     | 0.008403 | 0.114000 | 3      |       |  |
|         |         |         |        |        |        | 76 | Heavy               | Not Fo | Not Fo | Not Fo | Peak F | High   | Peak F | High   | Peak F | High   | High   | 0.009259 | 0.168200 | 1.06     | 12.36  |       |  |

|          |          |          |        |        |       |     |                    |        |        |        |        |        |        |        |          |          |          |        |  |
|----------|----------|----------|--------|--------|-------|-----|--------------------|--------|--------|--------|--------|--------|--------|--------|----------|----------|----------|--------|--|
| 22899508 | 20475620 | 12292065 |        |        | 19905 | 77  | Light              | High   | High   | High   | Not Fo | Not Fo | Peak F | High   | 0.008403 | 0.000136 | 6.96     | 168.86 |  |
| 494768   | 582744   | 323550   | 172666 | 76107  | 69871 | 78  | Light              | High   | High   | High   | Peak F | Peak F | Peak F | High   | 0.008403 | 0.000354 | 6.46     | 161.39 |  |
| 2403952  | 1924722  | 1002535  |        |        |       | 79  | Light              | High   | Peak F | High   | Not Fo | Not Fo | Not Fc | High   | 0.008403 | 0.001131 | 5.55     | 190.68 |  |
| 431405   | 768994   | 250102   | 11727  |        |       | 80  | Light              | High   | Peak F | High   | Peak F | Not Fo | Not Fc | High   | 0.008403 | 0.001449 | 4.8      | 182.22 |  |
|          | 80137    |          |        |        |       | 81  | Light              | Not Fo | High   | Not Fo | Not Fo | Not Fo | Not Fc | High   | 0.009259 | 0.114400 | 2.3      | 165.92 |  |
|          |          |          |        |        |       |     | IndistinguishableC | Not Fo | Not Fo | Not Fo | Not Fo | Not Fo | Not Fc | High   | 0.008403 | 0.208900 | 2.63     | 95.47  |  |
| 530176   | 393517   | 163448   |        |        |       | 82  | Light              | High   | Peak F | High   | Not Fo | Not Fo | Not Fc | High   | 0.008403 | 0.002845 | 5.5      | 139.95 |  |
| 137791   | 484432   | 153442   | 5233   | 9500   | 5075  | 83  | Light              | High   | Peak F | High   | Peak F | Peak F | Peak F | High   | 0.008403 | 0.003002 | 5.33     | 195.01 |  |
| 578884   | 409722   | 125521   | 122297 | 63697  | 28072 | 84  | NotUnique          | Light  | High   | Peak F | Peak F | Peak F | Peak F | High   | 0.008403 | 0.051630 | 2.24     | 40.55  |  |
| 2377187  | 6228128  | 1348546  |        |        |       | 85  | Light              | High   | High   | High   | Not Fo | Not Fo | Not Fc | High   | 0.009259 | 0.012770 | 3.61     | 122.66 |  |
| 4367816  | 1705324  | 608795   |        |        |       | 86  | Light              | High   | High   | High   | Not Fo | Not Fo | Not Fc | High   | 0.009259 | 0.010940 | 3.84     | 102.08 |  |
| 71684    |          | 35100    |        |        |       | 87  | Light              | Peak F | High   | High   | Not Fo | Not Fo | Not Fc | High   | 0.009259 | 0.117900 | 3.92     | 100.36 |  |
|          | 72454    |          |        |        |       | 88  | Light              | High   | High   | Not Fo | Not Fo | Not Fo | Not Fc | High   | 0.008403 | 0.034170 | 2.96     | 167.71 |  |
| 60231    | 138306   |          | 19747  | 31688  | 11867 | 89  | Light              | Peak F | High   | Not Fo | Peak F | Peak F | Peak F | High   | 0.009259 | 0.026550 | 3.07     | 77.25  |  |
| 247699   | 57807    | 64871    |        |        |       | 90  | Light              | High   | High   | High   | Not Fo | Not Fo | Not Fc | High   | 0.008403 | 0.008213 | 3.14     | 39.98  |  |
| 40367    | 55399    | 41218    |        |        |       | 91  | Light              | Peak F | High   | Peak F | Not Fo | Not Fo | Not Fc | High   | 0.009259 | 0.146500 | 2.76     | 60.61  |  |
| 2171184  | 1593495  | 989839   | 12853  | 9017   | 10592 | 92  | Light              | Peak F | High   | High   | Peak F | Peak F | Peak F | High   | 0.009259 | 0.019450 | 3.44     | 139.68 |  |
| 21548810 | 24474535 | 11053491 |        |        |       | 93  | Light              | High   | High   | High   | Not Fo | Not Fo | Not Fc | High   | 0.008403 | 0.003714 | 4.86     | 131.62 |  |
| 1504040  | 1085997  | 365105   | 305514 | 196632 | 84785 | 94  | Light              | Peak F | High   | High   | Peak F | Peak F | Peak F | High   | 0.009259 | 0.042520 | 1.8      | 54.57  |  |
| 586693   | 1413747  | 168212   | 148746 | 277727 | 38433 | 95  | Light              | Peak F | High   | Peak F | Peak F | Peak F | Peak F | High   | 0.009259 | 0.125400 | 1.36     | 108.35 |  |
| 170693   | 467321   | 127986   | 30635  | 66973  | 21622 | 96  | Light              | Peak F | High   | Peak F | Peak F | Peak F | Peak F | High   | 0.009259 | 0.024390 | 2.43     | 93.07  |  |
| 5265     | 5594     |          |        |        |       | 97  | Light              | Peak F | High   | Not Fo | Not Fo | Not Fo | Not Fc | High   | 0.009259 | 0.068740 | 2.93     | 49.18  |  |
| 218478   | 72070    | 33014    |        |        |       | 98  | Light              | High   | High   | Peak F | Not Fo | Not Fo | Not Fc | High   | 0.008403 | 0.015950 | 3.3      | 50.17  |  |
| 26416    | 56783    | 16626    | 4687   | 12798  | 2259  | 99  | Light              | Peak F | High   | Peak F | Peak F | Peak F | Peak F | High   | 0.009259 | 0.031810 | 5.28     | 123.46 |  |
| 16509    | 27475    | 20735    |        |        |       | 100 | Light              | Peak F | High   | Peak F | Not Fo | Not Fo | Not Fc | High   | 0.009259 | 0.033480 | 3.7      | 131.5  |  |
|          | 65407    |          |        | 17326  |       | 101 | Light              | Not Fo | High   | Not Fo | Not Fo | Peak F | Not Fc | High   | 0.009259 | 0.040210 | 3.73     | 177.74 |  |
| 7300     | 29761    | 3800     |        |        |       | 102 | Light              | High   | Peak F | High   | Not Fo | Not Fo | Not Fc | High   | 0.008403 | 0.105500 | 2.93     | 199.6  |  |
| 56449    | 32288    | 8406     | 140792 | 153438 | 34345 | 103 | Heavy              | Peak F | Peak F | Peak F | Peak F | High   | Peak F | High   | 0.009259 | 0.054080 | 3.79     | 23.61  |  |
|          |          |          |        |        |       | 104 | NoQuanV            | Light  | Not Fo | High   | Not Fo | Not Fo | Not Fo | Not Fc | High     | 0.009259 | 0.119500 | 3.36   |  |
| 959801   | 325464   | 163114   |        |        |       | 105 | Light              | High   | Peak F | High   | Not Fo | Not Fo | Not Fc | High   | 0.008403 | 0.194300 | 1.87     | 92.33  |  |
| 46417    | 26192    | 14880    |        |        |       | 106 | Light              | High   | Peak F | Peak F | Not Fo | Not Fo | Not Fc | High   | 0.008403 | 0.082590 | 2.18     | 75.29  |  |
|          |          |          |        |        |       | 107 | NoQuanV            | Light  | High   | Not Fo | Not Fo | Not Fo | Not Fo | Not Fc | High     | 0.008403 | 0.231600 | 1.45   |  |
| 1540761  | 1534981  | 840631   | 133889 | 189729 | 65440 | 108 | Light              | High   | Peak F | Peak F | Peak F | Peak F | Peak F | High   | 0.008403 | 0.082590 | 2.53     | 95.34  |  |
| 94048    | 1218627  | 250218   | 19563  | 196173 | 76890 | 109 | Light              | High   | High   | Peak F | Peak F | Peak F | Peak F | High   | 0.009259 | 0.152300 | 1.51     | 195.18 |  |
| 305723   | 404664   | 141628   |        |        |       | 110 | Light              | Peak F | High   | High   | Not Fo | Not Fo | Not Fc | High   | 0.009259 | 0.046360 | 2.82     | 81.74  |  |
| 124064   | 66377    |          |        |        |       | 111 | Light              | High   | High   | Not Fo | Not Fo | Not Fo | Not Fc | High   | 0.009259 | 0.004144 | 3.7      | 164.94 |  |
|          | 30343    | 11389    |        |        |       | 112 | Light              | Not Fo | High   | Peak F | Not Fo | Not Fo | Not Fc | High   | 0.009259 | 0.056060 | 4.37     | 197.08 |  |
| 56858    | 36001    | 23487    |        |        |       | 113 | Light              | High   | Peak F | Peak F | Not Fo | Not Fo | Not Fc | High   | 0.008403 | 0.052550 | 2.57     | 105    |  |
| 38416    |          |          |        |        |       | 114 | Light              | High   | Not Fo | Not Fo | Not Fo | Not Fo | Not Fc | High   | 0.008403 | 0.074880 | 2.16     | 156.15 |  |
| 186950   | 46790    | 12214    | 12042  |        |       | 115 | Light              | High   | Peak F | Peak F | Peak F | Not Fo | Not Fc | High   | 0.008403 | 0.161600 | 1.24     | 97.25  |  |
| 60354    |          |          |        |        |       | 116 | Light              | High   | Not Fo | Not Fo | Not Fo | Not Fo | Not Fc | High   | 0.008403 | 0.143400 | 2.71     | 162.9  |  |
| 714867   | 622322   | 217377   |        |        |       | 117 | Light              | High   | High   | Peak F | Not Fo | Not Fo | Not Fc | High   | 0.009259 | 0.060220 | 3.76     | 152.12 |  |

|          |          |          |        |        |       |     |                |        |        |        |        |        |        |      |          |          |      |        |
|----------|----------|----------|--------|--------|-------|-----|----------------|--------|--------|--------|--------|--------|--------|------|----------|----------|------|--------|
| 1731916  | 1136332  | 449612   |        |        |       | 118 | Light          | High   | High   | High   | Not Fo | Not Fo | Not Fo | High | 0.008403 | 0.051290 | 3.89 | 142.98 |
| 1880454  | 1269281  | 477432   |        |        |       | 119 | Light          | High   | High   | High   | Not Fo | Not Fo | Not Fo | High | 0.008403 | 0.058570 | 3.17 | 134.9  |
| 150775   | 116343   |          | 34616  |        |       | 120 | Light          | High   | Peak F | Not Fo | Peak F | Not Fo | Not Fo | High | 0.008403 | 0.053370 | 3.6  | 174.13 |
| 38727    | 57176    | 20634    | 30107  | 26423  | 20122 | 121 | Light          | High   | High   | Peak F | Peak F | Peak F | Peak F | High | 0.008403 | 0.068230 | 2.85 | 155.53 |
| 23219206 | 21581588 | 12364321 |        |        |       | 122 | Light          | High   | High   | High   | Not Fo | Not Fo | Not Fo | High | 0.008403 | 0.053240 | 2.28 | 89.77  |
| 263272   | 115304   | 32557    | 163418 | 98580  | 31041 | 123 | Heavy          | Peak F | Peak F | Peak F | Peak F | High   | Peak F | High | 0.009259 | 0.115200 | 2.24 | 110.95 |
| 244625   | 1296031  | 128397   | 39166  | 168521 | 28853 | 124 | Light          | Peak F | High   | High   | Peak F | Peak F | Peak F | High | 0.009259 | 0.016900 | 5.01 | 208.05 |
| 41089    | 69325    |          |        |        |       | 125 | Light          | High   | Peak F | Not Fo | Not Fo | Not Fo | Not Fo | High | 0.008403 | 0.056100 | 1.69 | 185.53 |
| 7469     | 31636    | 7734     |        |        |       | 126 | Light          | Peak F | High   | Peak F | Not Fo | Not Fo | Not Fo | High | 0.009259 | 0.145300 | 2.28 | 124.2  |
| 78275    | 202871   | 26547    | 10603  | 27596  | 4504  | 127 | Light          | Peak F | High   | Peak F | Peak F | Peak F | Peak F | High | 0.009259 | 0.111400 | 2.62 | 107.38 |
| 135917   | 69435    | 38618    |        |        |       | 128 | Light          | High   | Peak F | High   | Not Fo | Not Fo | Not Fo | High | 0.008403 | 0.085330 | 2.79 | 132.23 |
|          |          |          |        |        |       | 129 | NoQuanV: Heavy | Not Fo | Not Fo | Not Fo | Not Fo | High   | Not Fo | High | 0.009259 | 0.045880 | 3.29 |        |
| 171941   | 140032   | 37473    | 37581  | 39541  | 10786 | 130 | Light          | High   | High   | Peak F | Peak F | Peak F | Peak F | High | 0.008403 | 0.010060 | 3.48 | 117.64 |
| 928364   | 399365   | 240996   | 3145   |        |       | 131 | Light          | High   | High   | Peak F | Peak F | Not Fo | Not Fo | High | 0.008403 | 0.034670 | 2.96 | 66.22  |
| 66440    | 20696    | 8914     |        |        |       | 132 | Light          | High   | Peak F | Peak F | Not Fo | Not Fo | Not Fo | High | 0.008403 | 0.003542 | 3.81 | 73.4   |
| 44967    | 203367   | 39556    | 14636  | 25989  | 3291  | 133 | Light          | High   | Peak F | High   | Peak F | Peak F | Peak F | High | 0.008403 | 0.026420 | 2.84 | 195.01 |
| 202305   | 162184   | 83695    | 22100  | 19326  | 9968  | 134 | Light          | Peak F | High   | High   | Peak F | Peak F | Peak F | High | 0.009259 | 0.175700 | 2.59 | 67.22  |
| 167531   | 260298   | 135771   | 8216   | 25166  | 8276  | 135 | Heavy          | Peak F | Peak F | Peak F | Peak F | High   | Peak F | High | 0.009259 | 0.100800 | 2.18 | 85.33  |
| 1984155  | 1345676  | 541102   | 7353   | 6950   |       | 136 | Light          | Peak F | High   | Peak F | Peak F | Peak F | Not Fo | High | 0.009259 | 0.052140 | 3.26 | 116.96 |

**Supplemental Table 4.2.** Raw Proteome discoverer output from the three replicates of Condition B

| Checked | Confid | Sequence       | Modifications  | Contami | Quality  | PEP      | Quality | q-va | Num1 | Num2 | Num          | Master         | Protei       | Master | Protei | Protein  | Acces  | Num    | Theo  | MH <sub>+</sub> | Abundances | Abundar | Abundar | Abundan |
|---------|--------|----------------|----------------|---------|----------|----------|---------|------|------|------|--------------|----------------|--------------|--------|--------|----------|--------|--------|-------|-----------------|------------|---------|---------|---------|
| FALSE   | High   | AAAAAAAAA      | AAAAATAPTTA    | FALSE   | 0.061508 | 0.009903 | 1       | 1    | 1    | 1    | P37108       | Signal recogni | P37108       | 0      | 2368.2 |          |        |        |       |                 |            |         |         |         |
| FALSE   | High   | RKPDTIEVQ      | QMK            | FALSE   | 0.058303 | 0.009903 | 1       | 3    | 2    | 2    | P35241       | Radixin OS=H   | P35241; P260 | 1      | 1472.8 | 334783   | 1502   | 34.95  |       |                 |            |         |         |         |
| FALSE   | High   | RKATGPPVSEI    | 3xLabel:13C(€  | FALSE   | 0.213189 | 0.009903 | 1       | 1    | 1    | 1    | P16401       | Histone H1.5   | P16401       | 2      | 1514.9 | 20857    | 37745  | 61.41  | 52.89 |                 |            |         |         |         |
| FALSE   | High   | RKASGPPVSELITK |                | FALSE   | 0.089855 | 0.009903 | 1       | 2    | 1    | 2    | P16402       | Histone H1.3   | P16402; P104 | 2      | 1482.9 | 81008    | 23323  | 33.12  | 40.08 |                 |            |         |         |         |
| FALSE   | High   | RGDLPFVVPRR    |                | FALSE   | 0.095214 | 0.009903 | 1       | 1    | 2    | 2    | P35579       | Myosin-9 OS=   | P35579       | 2      | 1311.8 | 26984    |        | 25.89  |       |                 |            |         |         |         |
| FALSE   | High   | RGAFSSVSMS     | 1xOxidation [I | FALSE   | 0.209531 | 0.009903 | 1       | 1    | 1    | 1    | P19013       | Keratin, type  | P19013       | 1      | 1442.7 | 195553   |        |        |       |                 |            |         |         |         |
| FALSE   | High   | RDTLLELKR      |                | TRUE    | 0.190443 | 0.009903 | 1       | 1    | 2    | 2    | cRAP117      | 000000 rLys-   | cRAP117      | 2      | 1256.8 | 787090   |        | 66.37  |       |                 |            |         |         |         |
| FALSE   | High   | RDTLLELKL      |                | TRUE    | 0.149668 | 0.009903 | 1       | 1    | 4    | 4    | cRAP117      | 000000 rLys-   | cRAP117      | 1      | 1100.7 | 11516309 |        | 50.17  |       |                 |            |         |         |         |
| FALSE   | High   | QVQSLTCEVD     | 1xCarbamido    | FALSE   | 0.095214 | 0.009903 | 1       | 1    | 1    | 1    | P08670       | Vimentin OS=   | P08670       | 1      | 2377.2 | 12020    |        | 92.23  |       |                 |            |         |         |         |
| FALSE   | High   | RKPDTIEVQQI    | 1xOxidation [I | FALSE   | 0.157091 | 0.009903 | 1       | 3    | 2    | 2    | P35241       | Radixin OS=H   | P35241; P260 | 1      | 1488.8 | 51681    |        | 64.77  |       |                 |            |         |         |         |
| FALSE   | High   | QVHPDTGISSK    |                | FALSE   | 0.131682 | 0.009903 | 1       | 15   | 1    | 1    | Q16778       | Histone H2B t  | Q16778; Q5Q  | 0      | 1168.6 | 96508    | 25493  | 67.53  | 68.1  |                 |            |         |         |         |
| FALSE   | High   | NLCNIPCSALL    | 3xCarbamido    | TRUE    | 0.057018 | 0.009903 | 1       | 1    | 3    | 3    | cRAP078      | Lysozyme C O   | cRAP078      | 0      | 2508.2 | 207152   | 7275   | 45.65  |       |                 |            |         |         |         |
| FALSE   | High   | NDYFSDFSGVYQ   | QISR           | TRUE    | 0.079309 | 0.009903 | 1       | 1    | 4    | 4    | cRAP117      | 000000 rLys-   | cRAP117      | 0      | 1884.8 | 1373511  |        | 25.27  |       |                 |            |         |         |         |
| FALSE   | High   | MVFTSSADGC     | 1xCarbamido    | TRUE    | 0.048778 | 0.009903 | 1       | 1    | 8    | 8    | cRAP117      | 000000 rLys-   | cRAP117      | 0      | 2707.2 | 302006   | 5463   | 37.06  |       |                 |            |         |         |         |
| FALSE   | High   | MVFTSSADGC     | 1xCarbamido    | TRUE    | 0.028311 | 0.009903 | 1       | 1    | 12   | 12   | cRAP117      | 000000 rLys-   | cRAP117      | 0      | 2691.2 | 5280815  |        | 30.41  |       |                 |            |         |         |         |
| FALSE   | High   | LSSPATLNSR     |                | TRUE    | 0.157091 | 0.009903 | 1       | 1    | 2    | 2    | cRAP112      | Trypsin OS=S   | cRAP112      | 0      | 1045.6 | 1476094  |        | 10.13  |       |                 |            |         |         |         |
| FALSE   | High   | ISLPLPNFSSLN   | LRETNLDSLPL    | FALSE   | 0.150329 | 0.009903 | 1       | 1    | 1    | 1    | P08670       | Vimentin OS=   | P08670       | 2      | 3376.8 | 12572    |        | 65.93  |       |                 |            |         |         |         |
| FALSE   | High   | ISGLIYEETR     |                | FALSE   | 0.157783 | 0.009903 | 1       | 1    | 2    | 2    | P62805       | Histone H4 O:  | P62805       | 0      | 1180.6 | 148545   | 3833   | 50.78  | 75.35 |                 |            |         |         |         |
| FALSE   | High   | LSAKPAPPKPE    | PRPK           | FALSE   | 0.214113 | 0.009903 | 1       | 1    | 1    | 1    | O00479       | High mobility  | O00479       | 0      | 1613.0 | 34684    | 1847   | 53.32  |       |                 |            |         |         |         |
| FALSE   | High   | NTDGSTDYGI     | LQINSR         | TRUE    | 0.073519 | 0.009903 | 1       | 1    | 2    | 2    | cRAP078      | Lysozyme C O   | cRAP078      | 0      | 1753.8 | 146877   |        | 7.12   |       |                 |            |         |         |         |
| FALSE   | High   | RTPPAGVFYQ     | GSATPIANG      | TRUE    | 0.044816 | 0.009903 | 1       | 1    | 4    | 4    | cRAP117      | 000000 rLys-   | cRAP117      | 1      | 3239.6 | 732045   |        | 23.04  |       |                 |            |         |         |         |
| FALSE   | High   | RTPPAGVFYQ     | GSATPIANG      | TRUE    | 0.122674 | 0.009903 | 1       | 1    | 3    | 3    | cRAP117      | 000000 rLys-   | cRAP117      | 2      | 3610.8 | 469226   |        | 62.62  |       |                 |            |         |         |         |
| FALSE   | High   | RVTIMPDKIQI    | 1xOxidation [I | FALSE   | 0.206826 | 0.009903 | 1       | 5    | 2    | 2    | P84243       | Histone H3.3   | P84243; Q16€ | 2      | 1556.9 | 450540   | 55894  | 66.99  | 30.74 |                 |            |         |         |         |
| FALSE   | High   | YEKDIAAYRAK    |                | FALSE   | 0.124316 | 0.009903 | 1       | 2    | 1    | 2    | P26583       | High mobility  | P26583; P094 | 2      | 1327.7 | 137167   |        | 81.06  |       |                 |            |         |         |         |
| FALSE   | High   | VTIAQGGVLP     | NIQAVLLPKKTE   | FALSE   | 0.084043 | 0.009903 | 2       | 8    | 1    | 1    | Q7L7L0; Q99€ | Histone H2A t  | Q7L7L0; P049 | 2      | 2778.6 | 56325    | 21715  | 104.38 |       |                 |            |         |         |         |
| FALSE   | High   | VTIAQGGVLP     | 1xLabel:13C(€  | FALSE   | 0.184721 | 0.009903 | 2       | 10   | 1    | 1    | Q7L7L0; Q99€ | Histone H2A t  | Q16777; Q7L: | 0      | 1937.2 | 246520   | 38289  |        |       |                 |            |         |         |         |
| FALSE   | High   | VFLENVIRDAV    | TYTEHAK        | FALSE   | 0.173004 | 0.009903 | 1       | 1    | 1    | 1    | P62805       | Histone H4 O:  | P62805       | 1      | 2105.1 | 11257    | 79386  | 26.42  | 13.09 |                 |            |         |         |         |
| FALSE   | High   | VDWPSAVVEGG    | SSGSGLLTV      | TRUE    | 0.038683 | 0.009903 | 1       | 1    | 4    | 4    | cRAP117      | 000000 rLys-   | cRAP117      | 0      | 2864.4 | 284304   |        | 23.6   |       |                 |            |         |         |         |
| FALSE   | High   | VAPEEHPVLL     | EAPLNPK        | FALSE   | 0.192946 | 0.009903 | 1       | 2    | 1    | 2    | P60709       | Actin, cytopla | P60709; P632 | 0      | 1954.1 | 51707    | 3738   | 22.82  | 73.52 |                 |            |         |         |         |
| FALSE   | High   | TVSLGAGAKD     | 3xLabel:13C(€  | FALSE   | 0.135224 | 0.009903 | 1       | 1    | 1    | 1    | P06748       | Nucleophosm    | P06748       | 2      | 3674.0 |          |        |        |       |                 |            |         |         |         |
| FALSE   | High   | TPPAGVFYQ      | GSATPIANGSI    | TRUE    | 0.149668 | 0.009903 | 1       | 1    | 3    | 3    | cRAP117      | 000000 rLys-   | cRAP117      | 2      | 3582.8 | 355737   |        | 27.73  |       |                 |            |         |         |         |
| FALSE   | High   | TPPAGVFYQ      | GSATPIANGSI    | TRUE    | 0.127665 | 0.009903 | 1       | 1    | 3    | 3    | cRAP117      | 000000 rLys-   | cRAP117      | 1      | 3454.7 | 1309984  |        | 50.76  |       |                 |            |         |         |         |
| FALSE   | High   | TLIKTVETRDG    | QVINETSQHI     | FALSE   | 0.213189 | 0.009903 | 1       | 1    | 1    | 1    | P08670       | Vimentin OS=   | P08670       | 2      | 2991.5 | 3726     |        | 120.55 |       |                 |            |         |         |         |
| FALSE   | High   | SYELPDGQVIT    | IGNER          | FALSE   | 0.188791 | 0.009903 | 1       | 10   | 1    | 1    | P60709       | Actin, cytopla | A5A3E0; P632 | 0      | 1790.9 | 46783    |        |        |       |                 |            |         |         |         |
| FALSE   | High   | STITSREIQTAV   | 2xLabel:13C(€  | FALSE   | 0.140708 | 0.009903 | 1       | 13   | 1    | 1    | Q16778       | Histone H2B t  | Q16778; Q5Q  | 1      | 1473.8 |          |        |        |       |                 |            |         |         |         |
| FALSE   | High   | STITSREIQTAVR  |                | FALSE   | 0.191274 | 0.009903 | 1       | 13   | 2    | 2    | Q16778       | Histone H2B t  | Q16778; Q5Q  | 1      | 1461.8 | 1035940  | 198732 | 63.46  | 66.43 |                 |            |         |         |         |
| FALSE   | High   | SRGSGGLGGA     | 1xCarbamido    | FALSE   | 0.079309 | 0.009903 | 1       | 3    | 1    | 1    | P04259       | Keratin, type  | P04259; P025 | 1      | 1667.8 | 143101   |        | 28.26  |       |                 |            |         |         |         |
| FALSE   | High   | SPAQILQWQV     | 1xCarbamido    | TRUE    | 0.055512 | 0.009903 | 1       | 1    | 1    | 1    | cRAP016      | Kappa-casein   | cRAP016      | 1      | 3211.6 | 38041    |        | 45.53  |       |                 |            |         |         |         |
| FALSE   | High   | SPAQILQWQV     | LSNTVPAK       | TRUE    | 0.065179 | 0.009903 | 1       | 1    | 4    | 4    | cRAP016      | Kappa-casein   | cRAP016      | 0      | 1980.1 | 338669   |        | 67.84  |       |                 |            |         |         |         |
| FALSE   | High   | SGGGGRFSS      | 1xCarbamido    | TRUE    | 0.099994 | 0.009903 | 1       | 1    | 1    | 1    | P04264       | Keratin, type  | P04264       | 1      | 2294.0 | 66971    |        | 40.4   |       |                 |            |         |         |         |

|       |      |                            |       |          |          |   |    |   |         |                             |   |        |         |       |        |        |
|-------|------|----------------------------|-------|----------|----------|---|----|---|---------|-----------------------------|---|--------|---------|-------|--------|--------|
| FALSE | High | SGGGGGGLGSGGSIR            | TRUE  | 0.073519 | 0.009903 | 1 | 1  | 2 | P35527  | Keratin, type P35527        | 0 | 1232.6 | 96449   |       | 46.31  |        |
| FALSE | High | SCAAAGTECL 2xCarbamido     | TRUE  | 0.147703 | 0.009903 | 1 | 1  | 2 | cRAP112 | Trypsin OS=S cRAP112        | 0 | 1882.8 | 26480   |       | 115.05 |        |
| FALSE | High | IITHPNFNNGT 1xOxidation [I | TRUE  | 0.096066 | 0.009903 | 1 | 1  | 3 | cRAP112 | Trypsin OS=S cRAP112        | 0 | 2299.2 | 85205   |       | 30.72  |        |
| FALSE | High | IITHPNFNNGTLDNDIMLIK       | TRUE  | 0.032653 | 0.009903 | 1 | 1  | 2 | cRAP112 | Trypsin OS=S cRAP112        | 0 | 2283.2 | 730113  | 7723  | 23.5   | 19.24  |
| FALSE | High | IIRSEDPNEDIVER             | FALSE | 0.173763 | 0.009903 | 1 | 1  | 1 | P01591  | Immunoglob P01591           | 1 | 1771.9 | 63887   |       | 120.09 |        |
| FALSE | High | LLCGLLAER 1xCarbamido      | FALSE | 0.210440 | 0.009903 | 1 | 1  | 1 | P14174  | Macrophage P14174           | 0 | 1050.6 | 25993   | 59316 | 60.3   | 53.89  |
| FALSE | High | GGGGSFGYSYGGGSGGFSA        | TRUE  | 0.052153 | 0.009903 | 1 | 1  | 2 | P35527  | Keratin, type P35527        | 0 | 2705.2 | 74580   | 10680 | 52.79  | 15.57  |
| FALSE | High | FSSCGGGGS 1xCarbamido      | TRUE  | 0.028311 | 0.009903 | 1 | 1  | 2 | P04264  | Keratin, type P04264        | 0 | 1765.7 | 171135  |       | 19.2   |        |
| FALSE | High | FGQSGPIVLDDVR              | FALSE | 0.217846 | 0.009903 | 1 | 1  | 1 | Q9UGM3  | Deleted in ma Q9UGM3        | 0 | 1459.8 | 199969  |       |        |        |
| FALSE | High | FFVAPPEVFGKEK              | TRUE  | 0.224524 | 0.009903 | 1 | 1  | 2 | cRAP013 | Alpha-S1-case cRAP013       | 1 | 1641.9 | 43065   |       | 57.07  |        |
| FALSE | High | FESNFNTQATNR               | TRUE  | 0.134627 | 0.009903 | 1 | 1  | 2 | cRAP078 | Lysozyme C O cRAP078        | 0 | 1428.7 | 104491  |       | 58.06  |        |
| FALSE | High | EIQTAVRLLLP 2xLabel:13C(€  | FALSE | 0.156402 | 0.009903 | 1 | 14 | 1 | Q16778  | Histone H2B t Q16778; Q5Q   | 1 | 1763.1 | 412612  | 98891 | 76.11  | 44.01  |
| FALSE | High | DGFGASGSCE 2xCarbamido     | TRUE  | 0.034448 | 0.009903 | 1 | 1  | 3 | cRAP117 | 000000 rLys- cRAP117        | 0 | 2231.9 | 118113  |       | 45.16  |        |
| FALSE | High | CNKEVYFAER 1xCarbamido     | FALSE | 0.092702 | 0.009903 | 1 | 1  | 2 | P50238  | Cysteine-rich P50238        | 1 | 1315.6 | 153072  | 16589 | 62.43  | 39.68  |
| FALSE | High | CKELGITALHIK 1xCarbamido   | FALSE | 0.184721 | 0.009903 | 1 | 1  | 1 | P62263  | 40S ribosoma P62263         | 1 | 1382.8 |         |       |        |        |
| FALSE | High | AYDNATAAVA 1xCarbamido     | TRUE  | 0.038856 | 0.009903 | 1 | 1  | 2 | cRAP117 | 000000 rLys- cRAP117        | 1 | 3766.8 | 234266  |       | 89.03  |        |
| FALSE | High | AYDNATAAVAK                | TRUE  | 0.137635 | 0.009903 | 1 | 1  | 4 | cRAP117 | 000000 rLys- cRAP117        | 0 | 1094.5 | 5687050 |       | 17.84  |        |
| FALSE | High | AVFVDLEPTVI 1xLabel:13C(€  | FALSE | 0.115285 | 0.009903 | 1 | 3  | 1 | Q71U36  | Tubulin alpha Q71U36; P68:  | 0 | 1707.9 |         | 16314 |        | 53.59  |
| FALSE | High | ATNYNAGDRSTDYGFQINSR       | TRUE  | 0.201514 | 0.009903 | 1 | 1  | 1 | P61626  | Lysozyme C O P61626         | 1 | 2363.1 | 15340   |       | 133.98 |        |
| FALSE | High | AQAAAPASVPAQAPK            | FALSE | 0.219735 | 0.009903 | 1 | 1  | 1 | P47914  | 60S ribosoma P47914         | 0 | 1377.7 | 168317  | 57903 | 52.57  | 59.27  |
| FALSE | High | AMGIMNSFVI 1xOxidation [I  | FALSE | 0.196331 | 0.009903 | 1 | 14 | 2 | Q16778  | Histone H2B t Q16778; Q5Q   | 0 | 1759.8 | 110048  | 32920 | 116.75 | 119.24 |
| FALSE | High | AGYRDGFGAS 2xCarbamido     | TRUE  | 0.034757 | 0.009903 | 1 | 1  | 8 | cRAP117 | 000000 rLys- cRAP117        | 2 | 3754.7 | 4393702 |       | 37.49  |        |
| FALSE | High | AGYRDGFGAS 2xCarbamido     | TRUE  | 0.028311 | 0.009903 | 1 | 1  | 8 | cRAP117 | 000000 rLys- cRAP117        | 1 | 2679.2 | 5771841 |       | 28.24  |        |
| FALSE | High | AGFAGDDAPRAVFPVGRPR        | FALSE | 0.208626 | 0.009903 | 1 | 9  | 1 | P60709  | Actin, cytopla A5A3E0; P632 | 1 | 2156.1 | 30625   | 4352  | 25.26  | 23.38  |
| FALSE | High | AAFSGSGGRGSSGGYSSGS        | TRUE  | 0.028311 | 0.009903 | 1 | 1  | 1 | P35908  | Keratin, type P35908        | 1 | 2501.1 | 26302   |       | 62.04  |        |
| FALSE | High | GGLYGGPSYC 1xCarbamido     | TRUE  | 0.073519 | 0.009903 | 1 | 1  | 4 | cRAP117 | 000000 rLys- cRAP117        | 0 | 1727.8 | 405943  |       | 40.87  |        |
| FALSE | High | YLGYLEQLLR                 | TRUE  | 0.213189 | 0.009903 | 1 | 1  | 2 | cRAP013 | Alpha-S1-case cRAP013       | 0 | 1267.7 | 424405  | 9055  | 64.49  | 62.34  |
| FALSE | High | GGLYGGPSYC 1xCarbamido     | TRUE  | 0.051921 | 0.009903 | 1 | 1  | 3 | cRAP117 | 000000 rLys- cRAP117        | 1 | 3593.6 | 2244644 |       | 43.86  |        |
| FALSE | High | GGSIGGGYGSGGGK             | TRUE  | 0.173004 | 0.009903 | 1 | 1  | 3 | P35908  | Keratin, type P35908        | 0 | 1197.5 | 54486   |       | 130.49 |        |
| FALSE | High | LKECCDKPLLE 2xCarbamido    | TRUE  | 0.097358 | 0.009903 | 1 | 1  | 1 | cRAP087 | Serum albumi cRAP087        | 1 | 1532.8 | 28537   |       | 42.66  |        |
| FALSE | High | LGTRLVPAERR                | FALSE | 0.155032 | 0.009903 | 1 | 1  | 1 | Q6NZI2  | Caveolae-assc Q6NZI2        | 2 | 1267.8 | 57586   |       | 16.57  |        |
| FALSE | High | LGEHNIDVLEGNEQFINAAK       | TRUE  | 0.039909 | 0.009903 | 1 | 1  | 2 | cRAP112 | Trypsin OS=S cRAP112        | 0 | 2211.1 | 3283452 |       | 26.43  |        |
| FALSE | High | KYSQGNVSAVGVTYDGHTAL       | TRUE  | 0.028311 | 0.009903 | 1 | 1  | 4 | cRAP117 | 000000 rLys- cRAP117        | 1 | 2324.2 | 1190312 |       | 30.49  |        |
| FALSE | High | KVPQVSTPTLVEVSR            | TRUE  | 0.147054 | 0.009903 | 1 | 2  | 2 | cRAP087 | Serum albumi cRAP087; P02   | 1 | 1639.9 | 41618   |       | 20.76  |        |
| FALSE | High | KTVTAMDVVYALKR             | FALSE | 0.138857 | 0.009903 | 1 | 1  | 1 | P62805  | Histone H4 O: P62805        | 2 | 1594.9 | 56835   | 12731 | 66.55  | 78.9   |
| FALSE | High | KLHTDVVENG 1xCarbamido     | FALSE | 0.175290 | 0.009903 | 1 | 1  | 1 | Q96J66  | ATP-binding c Q96J66        | 2 | 2824.5 |         |       |        |        |
| FALSE | High | KGTVEGFEPAL 1xCarbamido    | FALSE | 0.102701 | 0.009903 | 1 | 1  | 1 | P37108  | Signal recogni P37108       | 2 | 1952.0 |         |       |        |        |
| FALSE | High | HLQLAIRNDEELNKLLGR         | FALSE | 0.163424 | 0.009903 | 1 | 3  | 1 | Q7L7L0  | Histone H2A t Q7L7L0; P049  | 2 | 2132.2 | 19359   | 13576 | 130.31 |        |
| FALSE | High | HLQLAIRNDEF 3xLabel:13C(€  | FALSE | 0.146407 | 0.009903 | 1 | 7  | 1 | Q99878  | Histone H2A t Q16777; Q99:  | 2 | 2122.2 | 227957  | 15557 |        | 122.86 |
| FALSE | High | HLQLAIRNDEELNKLLGK         | FALSE | 0.097793 | 0.009903 | 1 | 7  | 1 | Q99878  | Histone H2A t Q16777; Q99:  | 2 | 2104.2 |         |       |        |        |
| FALSE | High | HGGGGGGFGGGGFSR            | TRUE  | 0.169258 | 0.009903 | 1 | 1  | 2 | P35908  | Keratin, type P35908        | 0 | 1320.6 | 96952   |       | 17.17  |        |
| FALSE | High | HAVSEGTKAV 3xLabel:13C(€   | FALSE | 0.100441 | 0.009903 | 1 | 12 | 1 | Q16778  | Histone H2B t Q16778; Q5Q   | 2 | 1812.0 |         |       |        |        |

|       |      |                          |       |          |          |   |    |   |         |                           |   |        |         |        |       |       |
|-------|------|--------------------------|-------|----------|----------|---|----|---|---------|---------------------------|---|--------|---------|--------|-------|-------|
| FALSE | High | HAVSEGTKAVTKYTSSK        | FALSE | 0.051921 | 0.009903 | 1 | 12 | 9 | Q16778  | Histone H2B t Q16778; Q5Q | 2 | 1793.9 | 631313  | 227158 | 68.21 | 43.65 |
| FALSE | High | HAVSEGTKAV 2xLabel:13C(€ | FALSE | 0.132266 | 0.009903 | 1 | 15 | 2 | Q16778  | Histone H2B t Q16778; Q5Q | 1 | 1239.7 |         |        |       |       |
| FALSE | High | HAVSEGTKAVTK             | FALSE | 0.082557 | 0.009903 | 1 | 15 | 6 | Q16778  | Histone H2B t Q16778; Q5Q | 1 | 1227.7 | 1225202 | 299464 | 50.69 | 65.3  |
| FALSE | High | GYSLGNWVC/ 1xCarbamido   | TRUE  | 0.143214 | 0.009903 | 1 | 1  | 2 | cRAP078 | Lysozyme C O cRAP078      | 0 | 1325.6 | 36316   |        | 41.37 |       |
| FALSE | High | GSRGGSGGSYGGGSGGGYGC     | TRUE  | 0.037662 | 0.009903 | 1 | 1  | 1 | P35527  | Keratin, type P35527      | 1 | 2091.9 | 15878   |        | 104.2 |       |
| FALSE | High | GSLGGGFSSGGFSGGSFSR      | TRUE  | 0.028311 | 0.009903 | 1 | 1  | 2 | P13645  | Keratin, type P13645      | 0 | 1707.8 | 83687   | 4005   | 65.19 |       |
| FALSE | High | GGSGGSYGGGSGGGYGGG!      | TRUE  | 0.149011 | 0.009903 | 1 | 1  | 1 | P35527  | Keratin, type P35527      | 0 | 1791.7 | 38309   |        | 94.47 |       |
| FALSE | High | YSQGNVSAVGVTYDGHTALTI    | TRUE  | 0.101339 | 0.009903 | 1 | 1  | 4 | cRAP117 | 000000 rLys- cRAP117      | 0 | 2196.1 | 1342856 |        | 18.47 |       |

| Abundance | Abundance | Abundance | Abundance | Abundance | Abundance | Precu | Quan I | Quan Ch           | Found   | Found   | Found   | Found   | Found   | Found   | Found | Confide  | Percolator q | Percolator PE | XCorr  | t Top | Apex | RT in min |
|-----------|-----------|-----------|-----------|-----------|-----------|-------|--------|-------------------|---------|---------|---------|---------|---------|---------|-------|----------|--------------|---------------|--------|-------|------|-----------|
| 581858    | 334783    | 327129    |           |           | 1502      | 60    |        | Indistinguishable | Not Fo  | Not Fo  | Not Fo  | Not Fo  | Not Fo  | Not Fo  | High  | 0.009524 | 0.03618      | 4.67          | 135.94 |       |      |           |
| 20857     | 17872     | 51110     | 37745     | 35640     | 85035     | 59    |        | Light             | High    | Peak Fr | High    | Not Fo  | Not Fo  | Peak Fr | High  | 0.009524 | 0.03428      | 3.31          | 57.03  |       |      |           |
| 62499     | 81008     | 119406    | 23323     | 16574     | 36672     | 58    |        | Heavy             | Peak Fr | Peak Fr | Peak Fr | Peak Fr | Peak Fr | High    | High  | 0.009524 | 0.1418       | 3.43          | 79.08  |       |      |           |
| 22423     |           | 32474     |           |           |           | 57    |        | Light             | Peak Fr | Peak Fr | High    | Peak Fr | Peak Fr | Peak Fr | High  | 0.009524 | 0.05484      | 3.6           | 76.54  |       |      |           |
| 195553    |           |           |           |           |           | 56    |        | Light             | High    | Not Fo  | High    | Not Fo  | Not Fo  | Not Fo  | High  | 0.009524 | 0.0584       | 3.74          | 99.89  |       |      |           |
| 576288    | 787090    | 1930723   |           |           |           | 55    |        | Light             | High    | Peak Fr | Peak Fr | Not Fo  | Not Fo  | Not Fo  | High  | 0.007576 | 0.1213       | 4.03          | 53.6   |       |      |           |
| 5953859   | 11516309  | 17718209  |           |           |           | 54    |        | Light             | High    | Peak Fr | High    | Not Fo  | Not Fo  | Not Fo  | High  | 0.009524 | 0.09604      | 3.22          | 121.82 |       |      |           |
| 4465      | 12020     | 34703     |           |           |           | 53    |        | Light             | Peak Fr | Peak Fr | High    | Not Fo  | Not Fo  | Not Fo  | High  | 0.009524 | 0.05838      | 2.91          | 139.48 |       |      |           |
| 86876     | 18902     | 51681     |           |           |           | 61    |        | Light             | High    | Peak Fr | High    | Not Fo  | Not Fo  | Not Fo  | High  | 0.009524 | 0.101        | 3.23          | 38.64  |       |      |           |
| 96508     | 95490     | 280054    | 25493     | 15390     | 58541     | 52    |        | Light             | Peak Fr | Peak Fr | High    | Peak Fr | Peak Fr | Peak Fr | High  | 0.009524 | 0.08341      | 1.75          | 39.03  |       |      |           |
| 207152    | 98600     | 272972    | 7275      |           |           | 50    |        | Light             | High    | Peak Fr | High    | Peak Fr | Not Fo  | Not Fo  | High  | 0.009524 | 0.0334       | 5.29          | 181.48 |       |      |           |
| 1360050   | 2066950   | 1373511   |           |           |           | 49    |        | Light             | High    | Peak Fr | High    | Not Fo  | Not Fo  | Not Fo  | High  | 0.007576 | 0.05251      | 5.32          | 190    |       |      |           |
| 335388    | 302006    | 152236    | 5463      |           |           | 48    |        | Light             | High    | Peak Fr | High    | Peak Fr | Not Fo  | Not Fo  | High  | 0.009524 | 0.02817      | 6.23          | 156.83 |       |      |           |
| 4131378   | 5280815   | 7504595   |           |           |           | 47    |        | Light             | High    | Peak Fr | High    | Not Fo  | Not Fo  | Not Fo  | High  | 0.009524 | 0.01554198   | 7.56          | 167.69 |       |      |           |
| 1581997   | 1476094   | 1291803   |           |           |           | 46    |        | Light             | High    | Peak Fr | High    | Not Fo  | Not Fo  | Not Fo  | High  | 0.009524 | 0.1016       | 2.56          | 71.41  |       |      |           |
|           | 7586      | 20835     |           |           |           | 45    |        | Light             | Not Fo  | Peak Fr | High    | Not Fo  | Not Fo  | Not Fo  | High  | 0.009524 | 0.0964       | 2.62          | 201.62 |       |      |           |
| 51633     | 148545    | 167935    | 3833      | 3016      | 11279     | 44    |        | Light             | High    | Peak Fr | High    | Peak Fr | Peak Fr | Peak Fr | High  | 0.009524 | 0.1015       | 3.8           | 114.28 |       |      |           |
| 16254     | 34684     | 53311     |           |           | 1847      | 43    |        | Light             | Peak Fr | Peak Fr | High    | Not Fo  | Not Fo  | Peak Fr | High  | 0.009524 | 0.1423       | 2.69          | 43.34  |       |      |           |
| 144278    | 146877    | 164154    |           |           |           | 51    |        | Light             | High    | Peak Fr | High    | Not Fo  | Not Fo  | Not Fo  | High  | 0.009524 | 0.07917      | 5.34          | 138.84 |       |      |           |
| 863108    | 732045    | 537521    |           |           |           | 62    |        | Light             | High    | Peak Fr | High    | Not Fo  | Not Fo  | Not Fo  | High  | 0.009524 | 0.02564      | 3.81          | 138.83 |       |      |           |
| 469226    | 1127767   | 372250    |           |           |           | 63    |        | Light             | High    | Peak Fr | High    | Not Fo  | Not Fo  | Not Fo  | High  | 0.009524 | 0.0772       | 4.19          | 130.66 |       |      |           |
| 120048    | 670726    | 450540    | 31485     | 55894     | 58691     | 64    |        | Light             | High    | Peak Fr | High    | Peak Fr | Peak Fr | Peak Fr | High  | 0.009524 | 0.1369       | 3.3           | 92.33  |       |      |           |
| 270668    | 33031     | 137167    |           |           |           | 82    |        | Light             | High    | Peak Fr | Peak Fr | Not Fo  | Not Fo  | Not Fo  | High  | 0.007576 | 0.06907      | 4.24          | 53.86  |       |      |           |
| 7119      | 56325     | 158513    |           |           | 21715     | 81    | NotUn  | Light             | Peak Fr | Peak Fr | High    | Not Fo  | Not Fo  | Peak Fr | High  | 0.009524 | 0.0509       | 2.28          | 145.95 |       |      |           |
|           |           | 246520    |           |           | 38289     | 80    | NotUn  | Heavy             | Not Fo  | Not Fo  | Peak Fr | Not Fo  | Not Fo  | High    | High  | 0.009524 | 0.1208       | 3.92          | 207.45 |       |      |           |
|           | 13599     | 9318      | 79386     | 77639     | 97705     | 79    |        | Light             | Not Fo  | Peak Fr | High    | Peak Fr | Peak Fr | Peak Fr | High  | 0.009524 | 0.1123       | 2.77          | 192.03 |       |      |           |
| 337714    | 284304    | 207854    |           |           |           | 78    |        | Light             | High    | Peak Fr | High    | Not Fo  | Not Fo  | Not Fo  | High  | 0.009524 | 0.02181      | 7.96          | 203.81 |       |      |           |
| 53953     | 34472     | 51707     | 2101      |           | 6650      | 77    |        | Light             | High    | Peak Fr | Peak Fr | Peak Fr | Not Fo  | Peak Fr | High  | 0.007576 | 0.1108       | 3.37          | 131.28 |       |      |           |
|           |           |           |           |           |           | 76    | NoQua  | Heavy             | Not Fo  | Not Fo  | Not Fo  | Not Fo  | Not Fo  | High    | High  | 0.009524 | 0.08569      | 3.97          |        |       |      |           |
| 464485    | 355737    | 264266    |           |           |           | 75    |        | Light             | High    | Peak Fr | High    | Not Fo  | Not Fo  | Not Fo  | High  | 0.009524 | 0.09595      | 3.63          | 133.96 |       |      |           |
| 1309984   | 1870732   | 595894    |           |           |           | 74    |        | Light             | High    | Peak Fr | High    | Not Fo  | Not Fo  | Not Fo  | High  | 0.009524 | 0.08048      | 4.72          | 142.03 |       |      |           |
| 3237      | 27382     | 3726      |           |           |           | 73    |        | Light             | Peak Fr | Peak Fr | High    | Not Fo  | Not Fo  | Not Fo  | High  | 0.009524 | 0.1418       | 4.22          | 122.55 |       |      |           |
| 46783     |           |           |           |           |           | 72    |        | Light             | High    | Not Fo  | Not Fo  | Not Fo  | Not Fo  | Not Fo  | High  | 0.007576 | 0.1084       | 4.26          | 163.88 |       |      |           |
|           |           |           |           |           |           | 71    | Redum  | Heavy             | Peak Fr | Peak Fr | Peak Fr | Peak Fr | Peak Fr | High    | High  | 0.009524 | 0.08965      | 3.4           | 82.05  |       |      |           |
| 223801    | 1035940   | 1184075   | 74905     | 198732    | 351093    | 71    |        | Light             | High    | Peak Fr | High    | Peak Fr | Peak Fr | Peak Fr | High  | 0.009524 | 0.1257       | 3.04          | 82.05  |       |      |           |
| 116862    | 175232    |           |           |           |           | 70    |        | Light             | High    | Peak Fr | Not Fo  | Not Fo  | Not Fo  | Not Fo  | High  | 0.007576 | 0.1771       | 5.5           | 69.21  |       |      |           |
|           | 27245     | 53116     |           |           |           | 69    |        | Light             | Not Fo  | Peak Fr | High    | Not Fo  | Not Fo  | Not Fo  | High  | 0.009524 | 0.03249      | 4.24          | 170.24 |       |      |           |
| 461526    | 74464     | 338669    |           |           |           | 68    |        | Light             | High    | Peak Fr | High    | Not Fo  | Not Fo  | Not Fo  | High  | 0.009524 | 0.0387       | 3.14          | 186.13 |       |      |           |
| 119497    | 58614     | 66971     |           |           |           | 67    |        | Light             | High    | Peak Fr | Peak Fr | Not Fo  | Not Fo  | Not Fo  | High  | 0.007576 | 0.05459      | 6.11          | 97.84  |       |      |           |



|         |         |         |       |        |       |                |         |                 |              |         |         |         |          |            |          |         |        |        |
|---------|---------|---------|-------|--------|-------|----------------|---------|-----------------|--------------|---------|---------|---------|----------|------------|----------|---------|--------|--------|
| 194898  | 96449   | 89827   |       |        | 66    | Light          | High    | Peak Fr High    | Not Fo       | Not Fo  | Not Fo  | High    | 0.009524 | 0.04932    | 4.79     | 56.14   |        |        |
| 26480   | 5102    | 103765  |       |        | 65    | Light          | Peak Fr | Peak Fr High    | Not Fo       | Not Fo  | Not Fo  | High    | 0.009524 | 0.09442    | 5.27     | 142.86  |        |        |
| 85205   | 57951   | 109717  |       |        | 42    | Light          | High    | Peak Fr High    | Not Fo       | Not Fo  | Not Fo  | High    | 0.009524 | 0.05906    | 3.94     | 160.51  |        |        |
| 837812  | 730113  | 516965  | 8856  | 6735   | 41    | Light          | High    | Peak Fr High    | Peak Fr      | Peak Fr | Not Fo  | High    | 0.009524 | 0.0182     | 3.5      | 169.23  |        |        |
| 223682  | 18247   |         |       |        | 40    | Light          | High    | Peak Fr Not Fo  | Not Fo       | Not Fo  | Not Fo  | High    | 0.007576 | 0.09923    | 4.8      | 84.06   |        |        |
| 29315   | 6373    | 25993   | 39708 | 88606  | 39    | Heavy          | Peak Fr | Peak Fr Peak Fr | Peak Fr      | Not Fo  | High    | High    | 0.009524 | 0.1396     | 2.29     | 139.75  |        |        |
| 93475   | 74580   | 26900   | 9563  | 11929  | 19    | Light          | High    | Peak Fr High    | Not Fo       | Peak Fr | Peak Fr | High    | 0.009524 | 0.03027    | 5.32     | 164.77  |        |        |
| 171135  | 173915  | 120921  |       |        | 18    | Light          | High    | Peak Fr High    | Not Fo       | Not Fo  | Not Fo  | High    | 0.009524 | 0.01554    | 5.81     | 110.29  |        |        |
| 199969  |         |         |       |        | 17    | Light          | High    | Not Fo          | Not Fo       | Not Fo  | Not Fo  | High    | 0.007576 | 0.1267     | 4.54     | 141.34  |        |        |
| 56550   | 14176   | 43065   |       |        | 16    | Light          | High    | Peak Fr High    | Not Fo       | Not Fo  | Not Fo  | High    | 0.009524 | 0.1503     | 3.87     | 180.53  |        |        |
| 104491  | 44313   | 166246  |       |        | 15    | Light          | High    | Peak Fr High    | Not Fo       | Not Fo  | Not Fo  | High    | 0.009524 | 0.08536    | 4.02     | 82.68   |        |        |
| 180204  | 938439  | 412612  | 52530 | 137040 | 98891 | 14             | Heavy   | Peak Fr         | Peak Fr      | Peak Fr | Peak Fr | High    | High     | 0.009524   | 0.1005   | 3.4     | 170.87 |        |
| 201507  | 118113  | 83467   |       |        | 13    | Light          | High    | Peak Fr High    | Not Fo       | Not Fo  | Not Fo  | High    | 0.009524 | 0.01922    | 3.79     | 121.85  |        |        |
| 287237  | 75175   | 153072  | 16589 | 8605   | 20435 | 12             | Light   | High            | Peak Fr High | Peak Fr | Peak Fr | Peak Fr | High     | 0.009524   | 0.05666  | 3.6     | 68.51  |        |
|         |         |         |       |        | 11    | NoQua          | Light   | Not Fo          | Not Fo       | High    | Not Fo  | Not Fo  | Not Fo   | High       | 0.009524 | 0.1209  | 2.89   |        |
| 40741   | 234266  | 497500  |       |        | 10    | Light          | High    | Peak Fr         | Peak Fr      | Not Fo  | Not Fo  | Not Fo  | High     | 0.007576   | 0.2278   | 4.58    | 199.81 |        |
| 5670736 | 7635451 | 5687050 |       |        | 9     | Light          | High    | Peak Fr High    | Not Fo       | Not Fo  | Not Fo  | High    | 0.009524 | 0.08756    | 4.1      | 60.89   |        |        |
|         |         |         | 10948 | 24308  | 8     | Heavy          | Not Fo  | Not Fo          | Not Fo       | Peak Fr | Not Fo  | High    | High     | 0.009524   | 0.07217  | 4.73    | 188.99 |        |
| 93306   |         | 2522    |       |        | 7     | Light          | High    | Not Fo          | Peak Fr      | Not Fo  | Not Fo  | Not Fo  | High     | 0.007576   | 0.1164   | 6.28    | 134.45 |        |
| 221806  | 64940   | 168317  | 57903 | 20431  | 84444 | 6              | Light   | High            | Peak Fr      | Peak Fr | Peak Fr | Peak Fr | High     | 0.007576   | 0.1277   | 3.44    | 73.38  |        |
| 34022   |         | 355968  | 9603  | 112848 | 5     | Light          | High    | Not Fo          | High         | Peak Fr | Not Fo  | Peak Fr | High     | 0.009524   | 0.1293   | 5.02    | 204.76 |        |
| 4393702 | 7842554 | 4190097 |       |        | 4     | Light          | High    | Peak Fr High    | Not Fo       | Not Fo  | Not Fo  | High    | 0.009524 | 0.01944    | 7.14     | 138.67  |        |        |
| 4072672 | 7299123 | 5771841 |       |        | 3     | Light          | High    | Peak Fr High    | Not Fo       | Not Fo  | Not Fo  | High    | 0.007576 | 0.01420443 | 6.95     | 112.96  |        |        |
| 42744   | 26570   | 30625   | 3683  | 5142   | 2     | Light          | Peak Fr | Peak Fr High    | Peak Fr      | Not Fo  | Peak Fr | High    | 0.009524 | 0.1385     | 3.07     | 138.93  |        |        |
| 41375   | 9480    | 26302   |       |        | 1     | Light          | High    | Peak Fr         | Peak Fr      | Not Fo  | Not Fo  | Not Fo  | High     | 0.007576   | 0.0142   | 7.73    | 67.77  |        |
| 731630  | 405943  | 357046  |       |        | 20    | Light          | High    | Peak Fr High    | Not Fo       | Not Fo  | Not Fo  | High    | 0.009524 | 0.06091    | 4.57     | 103.93  |        |        |
| 259410  |         | 694343  | 9055  | 20691  | 6556  | 83             | Light   | High            | Not Fo       | High    | Peak Fr | Peak Fr | Peak Fr  | High       | 0.009524 | 0.1418  | 2.96   | 194.52 |
| 2244644 | 4262019 | 1995427 |       |        | 21    | Light          | High    | Peak Fr High    | Not Fo       | Not Fo  | Not Fo  | High    | 0.009524 | 0.03012    | 5.19     | 186.21  |        |        |
| 307411  | 8299    | 54486   |       |        | 23    | Light          | High    | Peak Fr High    | Not Fo       | Not Fo  | Not Fo  | High    | 0.009524 | 0.1124     | 4.62     | 43.78   |        |        |
| 40128   | 16041   | 28537   |       |        | 38    | Light          | High    | Peak Fr         | Peak Fr      | Not Fo  | Not Fo  | Not Fo  | High     | 0.007576   | 0.05304  | 2.87    | 58.29  |        |
| 65711   | 46955   | 57586   |       |        | 37    | Light          | Peak Fr | Peak Fr High    | Not Fo       | Not Fo  | Not Fo  | High    | 0.009524 | 0.09985    | 2.07     | 58.7    |        |        |
| 3283452 | 3307397 | 1986920 |       |        | 36    | Light          | High    | Peak Fr High    | Not Fo       | Not Fo  | Not Fo  | High    | 0.007576 | 0.04276    | 5.99     | 150.14  |        |        |
| 943981  | 1709119 | 1190312 |       |        | 35    | Light          | High    | Peak Fr High    | Not Fo       | Not Fo  | Not Fo  | High    | 0.007576 | 0.0142     | 6.14     | 102.14  |        |        |
| 41618   | 32396   | 49470   |       |        | 34    | Light          | High    | Peak Fr High    | Not Fo       | Not Fo  | Not Fo  | High    | 0.007576 | 0.09083    | 4.41     | 117.15  |        |        |
| 21154   | 56835   | 100006  | 6782  | 23898  | 33    | Light          | Peak Fr | Peak Fr High    | Peak Fr      | Not Fo  | Peak Fr | High    | 0.009524 | 0.1084     | 3.99     | 134.04  |        |        |
|         |         |         |       |        |       | Inconsistently | La      | Not Fo          | Not Fo       | Not Fo  | Not Fo  | Not Fo  | Not Fo   | High       | 0.009524 | 0.1139  | 1.71   | 102.06 |
|         |         |         |       |        | 32    | NoQua          | Heavy   | Not Fo          | Not Fo       | Not Fo  | Not Fo  | Not Fo  | High     | High       | 0.009524 | 0.06356 | 4.82   |        |
| 2498    | 19359   | 106012  |       |        | 31    | Light          | Peak Fr | Peak Fr High    | Not Fo       | Not Fo  | Peak Fr | High    | 0.009524 | 0.1055     | 3.16     | 144.35  |        |        |
|         |         | 227957  | 4122  | 58705  | 30    | Heavy          | Not Fo  | Not Fo          | Peak Fr      | Peak Fr | Not Fo  | High    | High     | 0.009524   | 0.09345  | 3.01    | 141.3  |        |
|         |         |         |       |        | 30    | Redun          | Light   | Not Fo          | Not Fo       | High    | Peak Fr | Not Fo  | Peak Fr  | High       | 0.009524 | 0.06003 | 2.59   | 141.31 |
| 96952   | 127734  | 95173   |       |        | 29    | Light          | High    | Peak Fr High    | Not Fo       | Not Fo  | Not Fo  | High    | 0.007576 | 0.1068     | 4.95     | 63.27   |        |        |
|         |         |         |       |        | 28    | Redun          | Heavy   | Peak Fr         | Peak Fr      | Peak Fr | Peak Fr | Peak Fr | High     | High       | 0.009524 | 0.06197 | 5.4    | 52.99  |

|         |         |         |        |        |        |    |              |         |         |         |         |         |         |      |          |         |      |        |
|---------|---------|---------|--------|--------|--------|----|--------------|---------|---------|---------|---------|---------|---------|------|----------|---------|------|--------|
| 163333  | 954217  | 631313  | 121061 | 313170 | 227158 | 28 | Light        | High    | Peak Fr | High    | Peak Fr | Peak Fr | Peak Fr | High | 0.009524 | 0.0301  | 5.84 | 52.99  |
| 1225202 | 572051  | 1779299 | 299464 | 85267  | 443532 | 27 | Redund Heavy | Peak Fr | Peak Fr | Peak Fr | High    | Peak Fr | High    | High | 0.009524 | 0.08365 | 4.26 | 22.94  |
| 47663   | 19352   | 36316   |        |        |        | 27 | Light        | High    | Peak Fr | High    | Peak Fr | Peak Fr | Peak Fr | High | 0.009524 | 0.05004 | 4.75 | 22.94  |
| 78340   | 12515   | 15878   |        |        |        | 26 | Light        | High    | Peak Fr | High    | Not Fo  | Not Fo  | Not Fo  | High | 0.009524 | 0.0915  | 3.79 | 146.76 |
| 232213  | 81572   | 83687   | 4005   |        |        | 25 | Light        | High    | Peak Fr | Peak Fr | Not Fo  | Not Fo  | Not Fo  | High | 0.007576 | 0.01927 | 6.35 | 38.55  |
| 148720  | 26765   | 38309   |        |        |        | 24 | Light        | High    | Peak Fr | High    | Peak Fr | Not Fo  | Not Fo  | High | 0.009524 | 0.0525  | 5.75 | 139.83 |
| 1342856 | 1532910 | 1052667 |        |        |        | 22 | Light        | High    | Peak Fr | Peak Fr | Not Fo  | Not Fo  | Not Fo  | High | 0.007576 | 0.08377 | 5.39 | 47.83  |
|         |         |         |        |        |        | 84 | Light        | High    | Peak Fr | High    | Not Fo  | Not Fo  | Not Fo  | High | 0.007576 | 0.1046  | 3.53 | 115.91 |

**Supplemental Table 4.3.** Raw Proteome discoverer output from the three replicates of Condition C

| Checker | Confid | Sequence                   | Modifications | Contami | Quality  | PEP | Qval | Nurr | Nurr | Nurr      | Master Pri       | Master   | Protein | Protei | Nur      | Theo   | Abundances | Abundan | Abundan | Abundan | Abundance | Abundance |        |
|---------|--------|----------------------------|---------------|---------|----------|-----|------|------|------|-----------|------------------|----------|---------|--------|----------|--------|------------|---------|---------|---------|-----------|-----------|--------|
| FALSE   | High   | AAFGGSGGRGSSSSGGYSSG       |               | TRUE    | 1.30E-05 | 0   | 1    | 1    | 1    | P35908    | Keratin, type II | P3590    | 1       | 2501   | 23168    |        |            |         |         | 52.5    |           | 15248     | 42876  |
| FALSE   | High   | NTDGSTDYGILQINSR           |               | TRUE    | 0.000719 | 0   | 1    | 1    | 4    | cRAP078   | Lysozyme C       | OS cRAP0 | 0       | 1754   | 293812   |        |            |         |         | 30.79   |           | 293812    | 303813 |
| FALSE   | High   | NVQALEIELQSQLALK           |               | TRUE    | 0.041544 | 0   | 1    | 1    | 1    | P13645    | Keratin, type I  | P1364    | 0       | 1797   |          |        |            |         |         |         |           |           |        |
| FALSE   | High   | QVHPDTGISSK                |               | FALSE   | 0.087527 | 0   | 2    | 15   | 2    | Q16778; C | Histone H2B ty   | Q1677    | 0       | 1169   | 154430   | 37923  |            |         |         | 99.82   | 75.22     | 154430    | 599198 |
| FALSE   | High   | QVQSLTCEV 1xCarbamidom     |               | FALSE   | 0.063161 | 0   | 1    | 1    | 1    | P08670    | Vimentin OS=H    | P0867    | 1       | 2377   | 18431    |        |            |         | 105.38  |         | 18431     | 57463     |        |
| FALSE   | High   | RDLLLLLELK                 |               | TRUE    | 0.034554 | 0   | 1    | 1    | 10   | cRAP117   | 000000 rLys-C    | cRAP1    | 1       | 1101   | 25409181 |        |            |         | 26.29   |         | 25409181  | 32893649  |        |
| FALSE   | High   | RDLLLLLELKR                |               | TRUE    | 0.014499 | 0   | 1    | 1    | 7    | cRAP117   | 000000 rLys-C    | cRAP1    | 2       | 1257   | 2083050  |        |            |         | 45.02   |         | 2975330   | 2083050   |        |
| FALSE   | High   | RGDLPPFVVR                 |               | FALSE   | 0.039197 | 0   | 1    | 1    | 3    | P35579    | Myosin-9 OS=H    | P3557    | 1       | 1156   | 223080   |        |            |         | 33.61   |         | 223080    | 311783    |        |
| FALSE   | High   | RKASGPPVSELITK             |               | FALSE   | 0.064184 | 0   | 2    | 2    | 1    | P16402; P | Histone H1.3 O   | P1640    | 2       | 1483   | 55839    | 16959  |            |         | 73.59   | 42.91   | 55839     | 113532    |        |
| FALSE   | High   | RKPDTIEVQMK                |               | FALSE   | 0.003237 | 0   | 1    | 3    | 3    | P35241    | Radixin OS=H     | P3524    | 1       | 1473   | 515492   |        |            |         | 24.71   |         | 590632    | 515492    |        |
| FALSE   | High   | RKPDTIEVQ( 1xOxidation [N  |               | FALSE   | 0.02616  | 0   | 1    | 3    | 2    | P35241    | Radixin OS=H     | P3524    | 1       | 1489   | 45052    |        |            |         | 27.95   |         | 60166     | 45052     |        |
| FALSE   | High   | RKPDTIEVQMKQAQR            |               | FALSE   | 0.030557 | 0   | 1    | 3    | 2    | P35241    | Radixin OS=H     | P3524    | 2       | 1899   | 67966    |        |            |         | 14.5    |         | 67966     | 82354     |        |
| FALSE   | High   | NMAINPSKE 2xCarbamidom     |               | TRUE    | 0.024439 | 0   | 1    | 1    | 1    | cRAP014   | Alpha-S2-casei   | cRAP0    | 2       | 2497   | 25146    |        |            |         | 113.94  |         | 8250      | 76644     |        |
| FALSE   | High   | RKTVTAMDVVYALK             |               | FALSE   | 0.001462 | 0   | 1    | 1    | 3    | P62805    | Histone H4 OS=   | P6280    | 2       | 1595   | 21898    | 7103   |            |         | 120.09  | 92.65   | 21898     | 89281     |        |
| FALSE   | High   | RTPPAGVFYQGSATPIANG        |               | TRUE    | 0.000154 | 0   | 1    | 1    | 14   | cRAP117   | 000000 rLys-C    | cRAP1    | 2       | 3611   | 17143618 |        |            |         | 27.03   |         | 17143618  | 25095979  |        |
| FALSE   | High   | RVTIMPK 2xLabel:13C(6)     |               | FALSE   | 0.158995 | 0   | 1    | 5    | 1    | P84243    | Histone H3.3 O   | P8424    | 1       | 857    | 164674   | 38401  |            |         | 78.02   | 49.04   | 164674    | 351674    |        |
| FALSE   | High   | RVTIMPKDIQLAR              |               | FALSE   | 0.058097 | 0   | 1    | 5    | 2    | P84243    | Histone H3.3 O   | P8424    | 2       | 1541   | 419746   | 100357 |            |         | 65.12   | 33.73   | 419746    | 864734    |        |
| FALSE   | High   | RVTIMPKDIK( 1xOxidation [N |               | FALSE   | 0.030557 | 0   | 1    | 5    | 2    | P84243    | Histone H3.3 O   | P8424    | 2       | 1557   | 119908   | 24640  |            |         | 61.75   | 27.96   | 119908    | 222479    |        |
| FALSE   | High   | SADTLWDIQ 2xLabel:13C(6)   |               | FALSE   | 0.20043  | 0   | 1    | 1    | 1    | P07195    | L-lactate dehyd  | P0719    | 2       | 1773   | 22009    | 55908  |            |         |         |         |           | 22009     |        |
| FALSE   | High   | SCAAAGTEC 2xCarbamidom     |               | TRUE    | 0.000128 | 0   | 1    | 1    | 2    | cRAP112   | Trypsin OS=Sus   | cRAP1    | 0       | 1883   | 263061   |        |            |         | 48.5    |         | 99633     | 263061    |        |
| FALSE   | High   | SCQAQPTTV 1xCarbamidom     |               | TRUE    | 0.008706 | 0   | 1    | 1    | 2    | cRAP016   | Kappa-casein C   | cRAP0    | 0       | 1251   | 66023    |        |            |         | 106     |         | 66023     | 261664    |        |
| FALSE   | High   | SGDAAIIVDM 1xCarbamidom    |               | FALSE   | 0.022906 | 0   | 1    | 2    | 1    | P68104    | Elongation fact  | P6810    | 0       | 2995   |          |        |            |         |         |         |           |           |        |
| FALSE   | High   | SGGGGGGG 1xCarbamidom      |               | FALSE   | 0.036154 | 0   | 1    | 1    | 1    | P13647    | Keratin, type II | P1364    | 1       | 2257   | 14512    |        |            |         | 68.9    |         | 14512     | 34950     |        |
| FALSE   | High   | SGGGGGGG 1xCarbamidom      |               | TRUE    | 0.0001   | 0   | 1    | 1    | 1    | P13645    | Keratin, type I  | P1364    | 0       | 1550   | 22936    |        |            |         | 48.08   |         | 22936     | 45267     |        |
| FALSE   | High   | SGGGGGGGGLSGGSIR           |               | TRUE    | 0.000287 | 0   | 1    | 1    | 2    | P35527    | Keratin, type I  | P3552    | 0       | 1233   | 132472   |        |            |         | 22.57   |         | 132472    | 186149    |        |
| FALSE   | High   | RTPPAGVFYQGSATPIANG        |               | TRUE    | 0.006866 | 0   | 1    | 1    | 6    | cRAP117   | 000000 rLys-C    | cRAP1    | 1       | 3240   | 1409932  |        |            |         | 52.57   |         | 1409932   | 1869592   |        |
| FALSE   | High   | SGVSLAALK                  |               | FALSE   | 0.050747 | 0   | 2    | 3    | 1    | P16402; P | Histone H1.3 O   | P1640    | 0       | 846    | 14244    | 21348  |            |         | 107.61  |         | 14244     | 74293     |        |
| FALSE   | High   | NMAINPSKE 2xCarbamidom     |               | TRUE    | 0.144894 | 0   | 1    | 1    | 1    | cRAP014   | Alpha-S2-casei   | cRAP0    | 1       | 2014   | 214409   |        |            |         |         |         |           | 214409    |        |
| FALSE   | High   | NIETIINTFHQYSVK            |               | FALSE   | 0.180284 | 0   | 1    | 1    | 1    | P06702    | Protein S100-A   | P0670    | 0       | 1807   |          |        |            |         |         |         |           |           |        |
| FALSE   | High   | IITHPNFNGNTLDNDIMLIKLS     |               | TRUE    | 0.0326   | 0   | 1    | 1    | 2    | cRAP112   | Trypsin OS=Sus   | cRAP1    | 1       | 3310   | 624786   |        |            |         | 38.78   |         | 452225    | 972316    |        |
| FALSE   | High   | IQVRLGEHNNIDVLEGNQFIN      |               | TRUE    | 0.048821 | 0   | 1    | 1    | 2    | cRAP112   | Trypsin OS=Sus   | cRAP1    | 1       | 2707   | 27339    |        |            |         | 22.82   |         | 25500     | 38327     |        |
| FALSE   | High   | LSAKPAPPKPEPKPK            |               | FALSE   | 0.22784  | 0   | 1    | 1    | 1    | P05204    | Non-histone ch   | P0520    | 0       | 1585   | 122333   | 11782  |            |         | 54.86   | 33.98   | 122333    | 233706    |        |
| FALSE   | High   | LSAKPAPPKPEPKPR            |               | FALSE   | 0.095674 | 0   | 1    | 1    | 1    | Q15651    | High mobility g  | Q1565    | 0       | 1613   | 10597    |        |            |         | 122.83  |         | 10597     | 56689     |        |
| FALSE   | High   | LSAKPAPPKPEPRPK            |               | FALSE   | 0.196249 | 0   | 1    | 1    | 2    | O00479    | High mobility g  | O0047    | 0       | 1613   | 36507    | 2595   |            |         | 119.3   |         | 36507     | 201872    |        |
| FALSE   | High   | ISGLIYEETR                 |               | FALSE   | 0.019166 | 0   | 1    | 1    | 2    | P62805    | Histone H4 OS=   | P6280    | 0       | 1181   | 231603   | 16336  |            |         | 56.48   | 68.88   | 197903    | 524449    |        |
| FALSE   | High   | ISGLIYEETRGLVK             |               | FALSE   | 0.125901 | 0   | 1    | 1    | 1    | P62805    | Histone H4 OS=   | P6280    | 1       | 1578   |          |        |            |         |         |         |           |           |        |
| FALSE   | High   | ISLPLPNFSSNLNRETNLDSLPL    |               | FALSE   | 0.074142 | 0   | 1    | 1    | 1    | P08670    | Vimentin OS=H    | P0867    | 2       | 3377   | 20293    |        |            |         | 128.77  |         |           | 93783     |        |
| FALSE   | High   | LSSPATLNSR                 |               | TRUE    | 0.111366 | 0   | 1    | 1    | 2    | cRAP112   | Trypsin OS=Sus   | cRAP1    | 0       | 1046   | 1936401  |        |            |         | 22.76   |         | 1936401   | 2498953   |        |
| FALSE   | High   | ISTVVSSKEV 3xLabel:13C(6)  |               | FALSE   | 0.048821 | 0   | 1    | 1    | 1    | P37108    | Signal recogniti | P3710    | 2       | 2532   | 7324     | 20367  |            |         | 102.92  |         | 2907      | 18452     |        |
| FALSE   | High   | LTGKDVNFE 1xLabel:13C(6)   |               | FALSE   | 0.114932 | 0   | 1    | 1    | 1    | P62081    | 40S ribosomal    | P6208    | 1       | 1790   | 41534    |        |            |         | 10.31   |         | 38610     | 44680     |        |

|       |      |                           |       |          |   |   |    |    |           |                    |       |   |      |          |        |        |       |          |          |
|-------|------|---------------------------|-------|----------|---|---|----|----|-----------|--------------------|-------|---|------|----------|--------|--------|-------|----------|----------|
| FALSE | High | NLQEAEEWYK                | FALSE | 0.018494 | 0 | 1 | 2  | 1  | P08670    | Vimentin OS=H      | P0867 | 0 | 1310 | 17548    |        | 101.66 |       | 17548    | 51184    |
| FALSE | High | ITIADCGQLE 1xCarbamidom   | TRUE  | 0.063978 | 0 | 1 | 1  | 2  | P62937    | Peptidyl-prolyl    | P6293 | 0 | 1120 |          |        |        |       |          |          |
| FALSE | High | MFLRGDSVIVLNRNPLIAGK      | FALSE | 0.164978 | 0 | 1 | 1  | 1  | P62316    | Small nuclear r    | P6231 | 2 | 2198 | 40000    | 8558   |        | 93.27 |          | 40000    |
| FALSE | High | MFLRGDSVI 3xLabel:13C(6)  | FALSE | 0.032917 | 0 | 1 | 1  | 1  | P62316    | Small nuclear r    | P6231 | 2 | 2216 |          |        |        |       |          |          |
| FALSE | High | MKYLFSSWL 1xCarbamidom    | FALSE | 0.175403 | 0 | 1 | 1  | 1  | Q5T7M9    | Protein FAM69      | Q5T7M | 1 | 3799 | 8787     | 4621   | 106.8  | 34.99 | 7313     | 46839    |
| FALSE | High | MIAGQVLDINLAAEPK          | FALSE | 0.052918 | 0 | 1 | 1  | 1  | P07910    | Heterogeneous      | P0791 | 0 | 1683 |          |        |        |       |          |          |
| FALSE | High | MIAGQVLDI 1xLabel:13C(6)  | FALSE | 0.004677 | 0 | 1 | 1  | 1  | P07910    | Heterogeneous      | P0791 | 0 | 1689 | 7689     | 29166  | 120.71 |       | 7689     | 45717    |
| FALSE | High | MVFTSSADC 1xCarbamidom    | TRUE  | 4.69E-05 | 0 | 1 | 1  | 17 | cRAP117   | 000000 rLys-C      | cRAP1 | 0 | 2691 | 10457346 | 27286  | 28.04  | 84.88 | 7625672  | 13533387 |
| FALSE | High | MVFTSSADC 1xCarbamidom    | TRUE  | 8.49E-05 | 0 | 1 | 1  | 11 | cRAP117   | 000000 rLys-C      | cRAP1 | 0 | 2707 | 259130   | 44180  | 17.25  |       | 259130   | 322097   |
| FALSE | High | NDEELNKLGR                | FALSE | 0.159978 | 0 | 1 | 3  | 1  | Q93077    | Histone H2A ty     | Q7L7L | 1 | 1301 | 13759    | 10828  | 123.52 | 17.56 | 13759    | 109257   |
| FALSE | High | NDYFSDFGVYSQISR           | TRUE  | 0.000227 | 0 | 1 | 1  | 7  | cRAP117   | 000000 rLys-C      | cRAP1 | 0 | 1885 | 2601187  |        | 46.08  |       | 2601187  | 2744995  |
| FALSE | High | NGLSLAALKI 3xLabel:13C(6) | FALSE | 0.116023 | 0 | 1 | 1  | 1  | P16401    | Histone H1.5 O     | P1640 | 2 | 2107 | 12269    | 34387  |        |       |          | 12269    |
| FALSE | High | NLCNIPCSAL 3xCarbamidom   | TRUE  | 0.00137  | 0 | 1 | 1  | 4  | cRAP078   | Lysozyme C OS      | cRAP0 | 0 | 2508 | 628974   | 3636   | 40.41  | 48.55 | 476683   | 1034335  |
| FALSE | High | LYAERYPII 1xCarbamidom    | TRUE  | 0.15039  | 0 | 1 | 1  | 1  | cRAP086   | Ovalbumin OS=      | cRAP0 | 2 | 2845 |          |        |        |       |          |          |
| FALSE | High | IITHPNFNGN 1xOxidation [N | TRUE  | 0.047119 | 0 | 1 | 1  | 4  | cRAP112   | Trypsin OS=Sus     | cRAP1 | 0 | 2299 | 268084   |        | 47.46  |       | 268084   | 503479   |
| FALSE | High | SGVSLAALKK                | FALSE | 0.016402 | 0 | 2 | 3  | 1  | P16402; P | Histone H1.3 O     | P1640 | 1 | 974  | 70160    | 29407  | 90.47  | 67.18 | 70160    | 171299   |
| FALSE | High | SLDLDSIIAEVK              | TRUE  | 0.011817 | 0 | 1 | 1  | 1  | P04264    | Keratin, type II   | P0426 | 0 | 1303 | 39862    |        | 18.88  |       | 34853    | 45590    |
| FALSE | High | VATVSLPR                  | TRUE  | 0.072965 | 0 | 1 | 1  | 3  | cRAP112   | Trypsin OS=Sus     | cRAP1 | 0 | 843  | 18005166 |        | 15.03  |       | 18237082 | 18005166 |
| FALSE | High | VCNYVNWIK 1xCarbamidom    | TRUE  | 0.063568 | 0 | 1 | 1  | 1  | cRAP112   | Trypsin OS=Sus     | cRAP1 | 0 | 1794 |          |        |        |       |          |          |
| FALSE | High | VDWPSAVVEGGSSGGLLTV       | TRUE  | 0.000199 | 0 | 1 | 1  | 6  | cRAP117   | 000000 rLys-C      | cRAP1 | 0 | 2864 | 568199   |        | 14.41  |       | 511383   | 677496   |
| FALSE | High | VDWPSAVVI 1xCarbamidom    | TRUE  | 0.077536 | 0 | 1 | 1  | 1  | cRAP117   | 000000 rLys-C      | cRAP1 | 1 | 4573 |          |        |        |       |          |          |
| FALSE | High | VERADGYEPPVQESV           | FALSE | 0.067565 | 0 | 1 | 1  | 1  | P61247    | 40S ribosomal      | P6124 | 1 | 1675 | 69997    | 56631  | 48.47  | 33.83 | 69997    | 90440    |
| FALSE | High | VFLENVIR                  | FALSE | 0.100334 | 0 | 1 | 1  | 1  | P62805    | Histone H4 OS=     | P6280 | 0 | 990  | 25007    | 6471   | 119.61 | 96.19 | 25007    | 170334   |
| FALSE | High | VFLENVIRDAVYTEHAK         | FALSE | 0.058097 | 0 | 1 | 1  | 2  | P62805    | Histone H4 OS=     | P6280 | 1 | 2105 | 43788    | 55063  | 50.25  | 23.41 | 43788    | 26060    |
| FALSE | High | VHPAVVIR                  | FALSE | 0.07438  | 0 | 1 | 1  | 1  | P62829    | 60S ribosomal      | P6282 | 0 | 891  | 91940    | 1635   | 16.42  | 62.71 | 91940    | 95732    |
| FALSE | High | VLKQVHPDTGISSK            | FALSE | 0.063773 | 0 | 2 | 15 | 3  | Q16778; C | Histone H2B ty     | Q1677 | 1 | 1509 | 104612   | 25057  | 76.82  | 48.64 | 104612   | 256183   |
| FALSE | High | VLPVPQKAVPYPQR            | TRUE  | 0.203463 | 0 | 1 | 1  | 1  | cRAP015   | Beta-casein OS     | cRAP0 | 1 | 1592 | 78015    |        | 120.08 |       | 22289    | 273067   |
| FALSE | High | VTIAQGGVLPNIQAVLLPK       | FALSE | 0.000169 | 0 | 2 | 10 | 5  | Q16777; C | Histone H2A ty     | Q1677 | 0 | 1931 | 929054   | 263588 | 114.55 | 87.55 | 929054   | 4182895  |
| FALSE | High | VAPEEHPVLLTEAPLNPK        | FALSE | 0.018919 | 0 | 1 | 2  | 1  | P60709    | Actin, cytoplasmic | P6070 | 0 | 1954 | 52653    | 10873  | 81.84  | 51.36 | 52653    | 130167   |
| FALSE | High | VTIAQGGVLI 1xLabel:13C(6) | FALSE | 0.199828 | 0 | 2 | 10 | 2  | Q16777; C | Histone H2A ty     | Q1677 | 0 | 1937 |          |        |        |       |          |          |
| FALSE | High | VTIAQGGVLPNIQAVLLPKKTI    | FALSE | 0.06649  | 0 | 1 | 1  | 1  | Q16777    | Histone H2A ty     | Q1677 | 2 | 2642 | 9298     |        | 92.86  |       | 9298     | 28893    |
| FALSE | High | VTIMPKDIQLAR              | FALSE | 0.114571 | 0 | 1 | 5  | 2  | P84243    | Histone H3.3 O     | P8424 | 1 | 1385 | 178059   | 37362  | 93.07  | 59.44 | 178059   | 591331   |
| FALSE | High | WWCNDGR 1xCarbamidom      | TRUE  | 0.124331 | 0 | 1 | 1  | 1  | cRAP078   | Lysozyme C OS      | cRAP0 | 0 | 993  | 45752    |        | 30.13  |       | 36850    | 56804    |
| FALSE | High | WWCNDGR 1xCarbamidom      | TRUE  | 0.059229 | 0 | 1 | 1  | 1  | cRAP078   | Lysozyme C OS      | cRAP0 | 1 | 1492 | 150658   |        | 38.46  |       | 150658   | 166149   |
| FALSE | High | YADLTEDQL 1xCarbamidom    | FALSE | 0.120866 | 0 | 1 | 1  | 2  | P18669    | Phosphoglyceric    | P1866 | 1 | 2437 |          | 49149  |        | 61.06 |          |          |
| FALSE | High | YALYDATYETK               | FALSE | 0.071348 | 0 | 1 | 2  | 2  | P23528    | Cofilin-1 OS=H     | P2352 | 0 | 1338 | 88240    | 23967  | 59.79  | 47.23 | 88240    | 161864   |
| FALSE | High | YALYDATYEI 1xLabel:13C(6) | FALSE | 0.180284 | 0 | 1 | 2  | 1  | P23528    | Cofilin-1 OS=H     | P2352 | 0 | 1344 |          |        |        |       |          |          |
| FALSE | High | YEKDIAAYR                 | FALSE | 0.042631 | 0 | 1 | 2  | 1  | P26583    | High mobility g    | P2658 | 1 | 1129 | 324092   | 1500   | 16.33  |       | 324092   | 339278   |
| FALSE | High | YEKDIAAYRAK               | FALSE | 0.205918 | 0 | 1 | 2  | 2  | P26583    | High mobility g    | P2658 | 2 | 1328 | 121464   | 1853   | 19.89  | 71.35 | 157296   | 107648   |
| FALSE | High | YLGYLEQLLR                | TRUE  | 0.035574 | 0 | 1 | 1  | 3  | cRAP013   | Alpha-S1-casein    | cRAP0 | 0 | 1268 | 338391   | 31279  | 159.2  | 34.6  | 338391   | 6035232  |
| FALSE | High | YRPGTVALR                 | FALSE | 0.151325 | 0 | 1 | 5  | 2  | P84243    | Histone H3.3 O     | P8424 | 0 | 1033 | 265681   | 35127  | 80.63  | 76.01 | 265681   | 814862   |
| FALSE | High | VTIAQGGVLPNIQAVLLPKKTI    | FALSE | 0.008    | 0 | 1 | 8  | 1  | Q93077    | Histone H2A ty     | Q7L7L | 2 | 2779 | 8664     | 2674   | 32.09  |       | 6877     | 10915    |

|       |      |                           |       |          |   |   |    |   |           |                              |   |      |         |        |        |        |  |         |         |
|-------|------|---------------------------|-------|----------|---|---|----|---|-----------|------------------------------|---|------|---------|--------|--------|--------|--|---------|---------|
| FALSE | High | SGVSLAALKk 3xLabel:13C(6) | FALSE | 0.043185 | 0 | 2 | 3  | 1 | P16402; P | Histone H1.3 O P1640         | 2 | 2080 | 150952  | 37742  |        |        |  |         | 150952  |
| FALSE | High | TYSLGALRPSTSR             | FALSE | 0.049295 | 0 | 1 | 1  | 1 | P08670    | Vimentin OS=H P0867          | 0 | 1496 | 38737   |        | 124.04 |        |  | 9911    | 151407  |
| FALSE | High | TVTAMDVV 1xOxidation [N   | FALSE | 0.100334 | 0 | 1 | 1  | 2 | P62805    | Histone H4 OS- P6280         | 0 | 1327 | 54819   | 7653   | 95.46  | 102.9  |  | 54819   | 181129  |
| FALSE | High | SISISVAR                  | TRUE  | 0.105212 | 0 | 1 | 1  | 1 | P04264    | Keratin, type II P0426       | 0 | 832  | 338942  |        | 11.62  |        |  | 292698  | 338942  |
| FALSE | High | SLVNLGGSK                 | TRUE  | 0.062155 | 0 | 1 | 1  | 4 | P04264    | Keratin, type II P0426       | 0 | 874  | 930681  |        | 38.77  |        |  | 930681  | 1261590 |
| FALSE | High | SLVNLGGSKSISISVAR         | TRUE  | 0.032285 | 0 | 1 | 1  | 1 | P04264    | Keratin, type II P0426       | 1 | 1688 | 23151   |        | 66.49  |        |  | 10170   | 44222   |
| FALSE | High | SPAQILQWQVLSNTVPAK        | TRUE  | 0.016086 | 0 | 1 | 1  | 4 | cRAP016   | Kappa-casein C cRAP0         | 0 | 1980 | 157734  |        | 130.75 |        |  | 157734  | 1107873 |
| FALSE | High | SPAQILQWC 1xCarbamidom    | TRUE  | 0.006028 | 0 | 1 | 1  | 2 | cRAP016   | Kappa-casein C cRAP0         | 1 | 3212 | 64485   |        | 113.87 |        |  | 21186   | 196281  |
| FALSE | High | SPAQILQWC 1xCarbamidom    | TRUE  | 0.008593 | 0 | 1 | 1  | 1 | cRAP016   | Kappa-casein C cRAP0         | 1 | 3228 | 84172   |        |        |        |  |         | 84172   |
| FALSE | High | SQRAGLQFPVGR              | FALSE | 0.092683 | 0 | 1 | 2  | 1 | Q71UI9    | Histone H2A.V Q71UI          | 1 | 1316 | 47042   | 7174   | 44.05  | 48.06  |  | 47042   | 87394   |
| FALSE | High | SRGSGGLGG 1xCarbamidom    | FALSE | 0.0004   | 0 | 1 | 3  | 1 | P04259    | Keratin, type II P0425       | 1 | 1668 | 22980   |        | 117.04 |        |  | 14387   | 134761  |
| FALSE | High | SSGPTSLFAVTVAPPGAR        | FALSE | 0.149925 | 0 | 1 | 1  | 1 | Q00839    | Heterogeneous Q0083          | 0 | 1715 |         |        |        |        |  |         |         |
| FALSE | High | SSLLEKGLDGAKK             | FALSE | 0.102908 | 0 | 1 | 1  | 1 | P81605    | Dermcidin OS= P8160          | 2 | 1346 | 46600   |        | 43.12  |        |  | 51542   | 46600   |
| FALSE | High | STELLIR                   | FALSE | 0.160472 | 0 | 1 | 5  | 2 | P84243    | Histone H3.3 O P8424         | 0 | 831  | 800295  | 87946  | 66.12  | 85     |  | 800295  | 1746260 |
| FALSE | High | TVTAMDVVYALKR             | FALSE | 0.134454 | 0 | 1 | 1  | 1 | P62805    | Histone H4 OS- P6280         | 1 | 1467 | 25422   | 5768   | 82.14  | 54.53  |  | 25422   | 59816   |
| FALSE | High | STITSREIQTAVR             | FALSE | 0.016998 | 0 | 1 | 13 | 4 | Q16778    | Histone H2B ty Q1677         | 1 | 1462 | 407059  | 126464 | 81.99  | 45.71  |  | 407059  | 1162101 |
| FALSE | High | STSSFCLSR 1xCarbamidom    | TRUE  | 0.090356 | 0 | 1 | 1  | 2 | P35908    | Keratin, type II P3590       | 0 | 1132 | 121617  |        | 67.26  |        |  | 121617  | 293585  |
| FALSE | High | SYELPDGQVITIGNER          | FALSE | 0.00212  | 0 | 1 | 10 | 2 | P60709    | Actin, cytoplasmic A5A3E     | 0 | 1791 | 40516   | 8980   | 71.26  | 16.9   |  | 40516   | 72786   |
| FALSE | High | TKVIPYVR                  | TRUE  | 0.086144 | 0 | 1 | 1  | 1 | cRAP014   | Alpha-S2-casein cRAP0        | 1 | 976  | 38674   |        | 124.05 |        |  | 38674   | 224218  |
| FALSE | High | TKVIPYVRYL                | TRUE  | 0.192727 | 0 | 1 | 1  | 1 | cRAP014   | Alpha-S2-casein cRAP0        | 2 | 1252 | 18842   |        | 112.25 |        |  | 18842   | 102964  |
| FALSE | High | TIGISVDPR                 | FALSE | 0.169598 | 0 | 1 | 1  | 1 | P26373    | 60S ribosomal P2637          | 0 | 958  |         |        |        |        |  |         |         |
| FALSE | High | TIPSWATLSASQLAR           | FALSE | 0.212169 | 0 | 1 | 1  | 1 | Q5SSJ5    | Heterochromatin Q5SSJ!       | 0 | 1602 | 37080   | 7440   |        |        |  |         | 37080   |
| FALSE | High | TPPAGVFYQGWSATPIANGSI     | TRUE  | 0.003083 | 0 | 1 | 1  | 3 | cRAP117   | 000000 rLys-C cRAP1          | 0 | 3084 | 563851  |        | 59.22  |        |  | 592212  | 563851  |
| FALSE | High | TPPAGVFYQGWSATPIANGSI     | TRUE  | 0.040484 | 0 | 1 | 1  | 4 | cRAP117   | 000000 rLys-C cRAP1          | 1 | 3455 | 1949843 |        | 57.03  |        |  | 2012182 | 1949843 |
| FALSE | High | TPPAGVFYQGWSATPIANGSI     | TRUE  | 0.012366 | 0 | 1 | 1  | 7 | cRAP117   | 000000 rLys-C cRAP1          | 2 | 3583 | 985990  |        | 65.62  |        |  | 985990  | 1041720 |
| FALSE | High | TTLCSILERI 1xCarbamidom   | FALSE | 0.160967 | 0 | 1 | 1  | 1 | Q16401    | 26S proteasome Q1640         | 2 | 2942 |         |        |        |        |  |         |         |
| FALSE | High | TVTAMDVV 1xLabel:13C(6)   | FALSE | 0.22784  | 0 | 1 | 1  | 1 | P62805    | Histone H4 OS- P6280         | 0 | 1317 | 52305   | 8404   | 114.31 | 101.07 |  | 52305   | 257357  |
| FALSE | High | STITSREIQT 2xLabel:13C(6) | FALSE | 0.043325 | 0 | 1 | 13 | 1 | Q16778    | Histone H2B ty Q1677         | 1 | 1474 |         |        |        |        |  |         |         |
| FALSE | High | IITHPNFNGNTLDNDIMLIK      | TRUE  | 0.001531 | 0 | 1 | 1  | 5 | cRAP112   | Trypsin OS=Sus cRAP1         | 0 | 2283 | 2062590 |        | 64.31  |        |  | 1578225 | 5001836 |
| FALSE | High | LLRKGNYAER                | FALSE | 0.072732 | 0 | 2 | 9  | 2 | Q16777; C | Histone H2A ty Q1677         | 2 | 1220 | 90361   | 15202  | 56.03  | 56.49  |  | 90361   | 183926  |
| FALSE | High | LIQENVVSV 1xLabel:13C(6)  | FALSE | 0.204688 | 0 | 1 | 1  | 1 | Q9P2D7    | Dynein heavy chain Q9P2E     | 1 | 3796 |         |        |        |        |  |         |         |
| FALSE | High | AYDNATAAV 1xCarbamidom    | TRUE  | 0.000203 | 0 | 1 | 1  | 2 | cRAP117   | 000000 rLys-C cRAP1          | 1 | 3767 | 476341  |        | 21.42  |        |  | 626947  | 476341  |
| FALSE | High | AYDNATAAV 1xCarbamidom    | TRUE  | 0.120866 | 0 | 1 | 1  | 1 | cRAP117   | 000000 rLys-C cRAP1          | 2 | 3923 |         |        |        |        |  |         |         |
| FALSE | High | CELAAMKF 1xCarbamidom     | TRUE  | 0.085054 | 0 | 1 | 1  | 1 | cRAP078   | Lysozyme C OS cRAP0          | 1 | 1050 | 103086  |        | 37.32  |        |  | 117233  | 103086  |
| FALSE | High | CNKEVYFAEI 1xCarbamidom   | FALSE | 0.036154 | 0 | 1 | 1  | 2 | P50238    | Cysteine-rich protein P5023  | 1 | 1316 | 202990  | 24628  | 46.97  | 19.64  |  | 292308  | 202990  |
| FALSE | High | CSQAVYAAE 1xCarbamidom    | FALSE | 0.112071 | 0 | 1 | 1  | 2 | P21291    | Cysteine and glutamine P2129 | 1 | 1652 | 164138  |        | 27.17  |        |  | 212245  | 164138  |
| FALSE | High | DAEAWFNEK                 | TRUE  | 0.064805 | 0 | 1 | 4  | 1 | P13645    | Keratin, type I Q7Z3Y        | 0 | 1109 | 33988   |        | 28.42  |        |  | 26071   | 46027   |
| FALSE | High | DAKRDTLLLELK              | TRUE  | 0.020784 | 0 | 1 | 1  | 2 | cRAP117   | 000000 rLys-C cRAP1          | 2 | 1415 | 135205  |        | 26.84  |        |  | 163334  | 135205  |
| FALSE | High | DGFGASGSC 2xCarbamidom    | TRUE  | 1.15E-05 | 0 | 1 | 1  | 6 | cRAP117   | 000000 rLys-C cRAP1          | 0 | 2232 | 397312  |        | 37.64  |        |  | 397312  | 422952  |
| FALSE | High | DGFGASGSC 2xCarbamidom    | TRUE  | 0.001305 | 0 | 1 | 1  | 2 | cRAP117   | 000000 rLys-C cRAP1          | 1 | 3307 | 44814   |        | 21.74  |        |  | 44814   | 46690   |
| FALSE | High | DGQVINETSQHDDLE           | FALSE | 0.158017 | 0 | 1 | 1  | 2 | P08670    | Vimentin OS=H P0867          | 0 | 1837 |         |        |        |        |  |         |         |
| FALSE | High | DNIQGITKPAIR              | FALSE | 0.025408 | 0 | 1 | 1  | 3 | P62805    | Histone H4 OS- P6280         | 0 | 1326 | 335535  | 51605  | 88.63  | 72.41  |  | 335535  | 1016714 |

|       |      |                           |       |          |   |   |    |    |           |                          |   |      |         |        |        |         |          |          |
|-------|------|---------------------------|-------|----------|---|---|----|----|-----------|--------------------------|---|------|---------|--------|--------|---------|----------|----------|
| FALSE | High | AYDNATAAVAK               | TRUE  | 0.004106 | 0 | 1 | 1  | 5  | cRAP117   | 000000 rLys-C cRAP1      | 0 | 1095 | 8386054 | 1424   | 39.14  | 8386054 | 11817950 |          |
| FALSE | High | DTLLELEK                  | TRUE  | 0.14625  | 0 | 1 | 1  | 2  | cRAP117   | 000000 rLys-C cRAP1      | 0 | 945  | 136043  | 3517   | 53.04  | 41.76   | 136043   | 153569   |
| FALSE | High | EGIHAQQKE 1xOxidation [N  | TRUE  | 0.183605 | 0 | 1 | 1  | 1  | cRAP013   | Alpha-S1-casein cRAP0    | 1 | 3224 | 29082   |        |        |         |          | 29082    |
| FALSE | High | ELINSWVESQTINGIIR         | TRUE  | 0.025823 | 0 | 1 | 1  | 1  | cRAP086   | Ovalbumin OS= cRAP0      | 0 | 1859 |         |        |        |         |          |          |
| FALSE | High | EIQTAVRLLLPGELAK          | FALSE | 0.036037 | 0 | 1 | 14 | 5  | Q16778    | Histone H2B ty Q1677     | 1 | 1751 | 851452  | 171849 | 116.74 | 90.96   | 851452   | 4633597  |
| FALSE | High | EIQTAVRLLL 2xLabel:13C(6) | FALSE | 0.015075 | 0 | 1 | 14 | 1  | Q16778    | Histone H2B ty Q1677     | 1 | 1763 |         |        |        |         |          |          |
| FALSE | High | EVQTAVRLLLPGELAK          | FALSE | 0.175939 | 0 | 1 | 1  | 1  | Q8N257    | Histone H2B ty Q8N25     | 1 | 1737 | 10422   | 11651  | 115.75 | 110.21  | 10422    | 57806    |
| FALSE | High | EVQTAVRLLI 2xLabel:13C(6) | FALSE | 0.172743 | 0 | 1 | 1  | 1  | Q8N257    | Histone H2B ty Q8N25     | 1 | 1749 |         |        |        |         |          |          |
| FALSE | High | FESNFNTQATNR              | TRUE  | 0.009351 | 0 | 1 | 1  | 2  | cRAP078   | Lysozyme C OS cRAP0      | 0 | 1429 | 131975  |        | 38.79  |         | 133030   | 131975   |
| FALSE | High | FFSDKIAK                  | TRUE  | 0.154638 | 0 | 1 | 1  | 1  | cRAP016   | Kappa-casein C cRAP0     | 1 | 956  | 11642   |        | 96.16  |         | 11642    | 33455    |
| FALSE | High | FFVAPFPEVFGK              | TRUE  | 0.15321  | 0 | 1 | 1  | 2  | cRAP013   | Alpha-S1-casein cRAP0    | 0 | 1385 | 459240  |        | 130.44 |         | 459240   | 3257098  |
| FALSE | High | FFVAPFPEVFGKEK            | TRUE  | 0.005854 | 0 | 1 | 1  | 2  | cRAP013   | Alpha-S1-casein cRAP0    | 1 | 1642 | 204644  |        | 138.8  |         | 204644   | 1961150  |
| FALSE | High | FLEQQNKILLAELEQLKGQGK     | FALSE | 0.004454 | 0 | 1 | 1  | 2  | P08670    | Vimentin OS=H P0867      | 2 | 2427 | 61159   |        |        |         |          | 61159    |
| FALSE | High | EGIHAQQKEPMIGVNQELAYI     | TRUE  | 0.106214 | 0 | 1 | 1  | 1  | cRAP013   | Alpha-S1-casein cRAP0    | 1 | 3208 |         |        |        |         |          |          |
| FALSE | High | FSSCGGGG 1xCarbamidom     | TRUE  | 0.000918 | 0 | 1 | 1  | 3  | P04264    | Keratin, type II P0426   | 0 | 1766 | 134372  |        | 21.84  |         | 134372   | 177916   |
| FALSE | High | AVKPKAAKPK                | FALSE | 0.049775 | 0 | 2 | 3  | 3  | P16401; P | Histone H1.5 O P1640     | 1 | 1038 | 98013   | 38421  | 93.39  | 72.95   | 98013    | 292145   |
| FALSE | High | ASGQAFELIL 1xLabel:13C(6) | FALSE | 0.021123 | 0 | 1 | 1  | 1  | P16949    | Stathmin OS=H P1694      | 0 | 1395 |         | 30348  | 48.74  |         |          |          |
| FALSE | High | AGFAGDDAPR                | FALSE | 0.02133  | 0 | 1 | 10 | 1  | P60709    | Actin, cytoplasmic A5A3E | 0 | 976  | 159146  | 43474  | 73.45  | 66      | 159146   | 383623   |
| FALSE | High | AGFAGDDA 1xLabel:13C(6)   | FALSE | 0.020649 | 0 | 1 | 10 | 2  | P60709    | Actin, cytoplasmic A5A3E | 0 | 982  |         |        |        |         |          |          |
| FALSE | High | AGFAGDDAPRAVFPVGRPF       | FALSE | 0.092683 | 0 | 1 | 9  | 1  | P60709    | Actin, cytoplasmic A5A3E | 1 | 2156 | 22136   | 6101   | 92.88  | 42.23   | 22136    | 52190    |
| FALSE | High | AGLQFPVGR                 | FALSE | 0.016725 | 0 | 3 | 15 | 2  | Q16777; C | Histone H2A ty Q1677     | 0 | 945  | 2562606 | 508858 | 88.6   | 67.14   | 2562606  | 7816538  |
| FALSE | High | AGLQFPVGRVHR              | FALSE | 0.097203 | 0 | 2 | 12 | 1  | Q16777; C | Histone H2A ty Q1677     | 1 | 1337 |         |        |        |         |          |          |
| FALSE | High | AGLQFPVGR 2xLabel:13C(6)  | FALSE | 0.16753  | 0 | 2 | 12 | 1  | Q16777; C | Histone H2A ty Q1677     | 1 | 1349 | 173277  | 39685  | 75.86  | 44.87   | 173277   | 427179   |
| FALSE | High | AGYRDGFG 2xCarbamidom     | TRUE  | 3.08E-05 | 0 | 1 | 1  | 12 | cRAP117   | 000000 rLys-C cRAP1      | 1 | 2679 | 8177292 |        | 16.55  |         | 8177292  | 10001487 |
| FALSE | High | AGYRDGFG 2xCarbamidom     | TRUE  | 8.80E-06 | 0 | 1 | 1  | 9  | cRAP117   | 000000 rLys-C cRAP1      | 2 | 3755 | 7345876 |        | 7.75   |         | 6967360  | 8104098  |
| FALSE | High | AHVEHMQS 1xOxidation [N   | FALSE | 0.196842 | 0 | 1 | 1  | 1  | Q13029    | PR domain zinc Q1302     | 0 | 2064 | 2943165 |        | 8.94   |         | 2943165  | 3335101  |
| FALSE | High | AKAPKPKAAKPK              | FALSE | 0.007351 | 0 | 1 | 1  | 1  | P16402    | Histone H1.3 O P1640     | 2 | 1235 | 30126   | 5585   | 106.03 | 56.51   |          | 79658    |
| FALSE | High | AKAVKPKAAKPK              | FALSE | 0.05942  | 0 | 1 | 1  | 1  | P10412    | Histone H1.4 O P1041     | 2 | 1237 | 22924   | 4392   | 110.68 | 73.24   | 22924    | 101131   |
| FALSE | High | AVFVDLEPT 1xLabel:13C(6)  | FALSE | 0.02764  | 0 | 1 | 3  | 3  | Q71U36    | Tubulin alpha-1 Q71U3    | 0 | 1708 | 7443    | 37469  | 40.23  | 75.21   | 5555     | 9972     |
| FALSE | High | ALAAAGYDVEK               | FALSE | 0.008849 | 0 | 3 | 5  | 1  | P16402; P | Histone H1.3 O P1640     | 0 | 1108 | 55986   | 22797  | 121.71 | 98.91   | 55986    | 339908   |
| FALSE | High | ALAAAGYDV 2xLabel:13C(6)  | FALSE | 0.131545 | 0 | 3 | 5  | 1  | P16402; P | Histone H1.3 O P1640     | 1 | 1591 |         |        |        |         |          |          |
| FALSE | High | ALCSEKLDQ 2xCarbamidom    | TRUE  | 0.015272 | 0 | 1 | 1  | 2  | cRAP075   | Alpha-lactalbumin cRAP0  | 2 | 1893 | 18699   |        | 145.14 |         | 18699    | 293387   |
| FALSE | High | AMGIMNSFVNDIFER           | FALSE | 0.001904 | 0 | 2 | 14 | 3  | Q16778; C | Histone H2B ty Q1677     | 0 | 1744 | 236583  | 66805  | 67.61  |         | 236583   | 360602   |
| FALSE | High | AMGIMNSF 1xLabel:13C(6)   | FALSE | 0.051075 | 0 | 2 | 14 | 1  | Q16778; C | Histone H2B ty Q1677     | 0 | 1750 |         |        |        |         |          |          |
| FALSE | High | AMGIMNSF 1xOxidation [N   | FALSE | 9.09E-05 | 0 | 2 | 14 | 5  | Q16778; C | Histone H2B ty Q1677     | 0 | 1760 | 355563  | 98456  | 135.89 | 121.31  | 247926   | 3592699  |
| FALSE | High | AMGIMNSF 1xOxidation [N   | FALSE | 0.052578 | 0 | 2 | 14 | 2  | Q16778; C | Histone H2B ty Q1677     | 0 | 1766 |         |        |        |         |          |          |
| FALSE | High | AMGIMNSF 2xOxidation [N   | FALSE | 0.006822 | 0 | 2 | 14 | 2  | Q16778; C | Histone H2B ty Q1677     | 0 | 1776 | 123848  | 19662  | 105.63 | 135.82  | 123848   | 553199   |
| FALSE | High | AMGIMNSF 2xOxidation [N   | FALSE | 0.009474 | 0 | 2 | 14 | 1  | Q16778; C | Histone H2B ty Q1677     | 0 | 1782 |         |        |        |         |          |          |
| FALSE | High | AMKPWIQPK                 | TRUE  | 0.147618 | 0 | 1 | 1  | 1  | cRAP014   | Alpha-S2-casein cRAP0    | 0 | 1099 | 11935   |        | 127.02 |         | 11935    | 84374    |
| FALSE | High | ASGPPVSELITK              | FALSE | 0.062355 | 0 | 2 | 3  | 1  | P16402; P | Histone H1.3 O P1640     | 0 | 1199 |         |        |        |         |          |          |
| FALSE | High | ASGPPVSELI 1xLabel:13C(6) | FALSE | 0.102908 | 0 | 2 | 3  | 1  | P16402; P | Histone H1.3 O P1640     | 0 | 1205 | 180985  | 37835  | 104.45 | 80.58   | 180985   | 686499   |
| FALSE | High | ALAAAGYDVEKNNSR           | FALSE | 0.196842 | 0 | 3 | 5  | 2  | P16402; P | Histone H1.3 O P1640     | 1 | 1579 | 72012   | 27957  | 102.75 | 75.76   | 72012    | 239097   |

|       |      |                            |       |          |   |   |    |   |           |                        |   |      |         |        |        |        |         |         |
|-------|------|----------------------------|-------|----------|---|---|----|---|-----------|------------------------|---|------|---------|--------|--------|--------|---------|---------|
| FALSE | High | GAVHDVKDVLDSVL             | FALSE | 0.226497 | 0 | 1 | 1  | 1 | P81605    | Dermcidin OS= P8160    | 1 | 1467 | 293617  | 7357   | 57.11  |        | 191344  | 450555  |
| FALSE | High | GDEELDSLK                  | FALSE | 0.141333 | 0 | 1 | 2  | 1 | Q71UI9    | Histone H2A.V Q71UI    | 0 | 1119 | 14224   | 9620   | 108.06 |        | 5201    | 38901   |
| FALSE | High | GGLEPINFQTAADQAR           | TRUE  | 0.005989 | 0 | 1 | 1  | 2 | cRAP086   | Ovalbumin OS= cRAP0    | 0 | 1688 | 27849   |        | 64.82  |        | 27849   | 49954   |
| FALSE | High | KGTVEGFEP, 1xCarbamidom    | FALSE | 0.003797 | 0 | 1 | 1  | 2 | P37108    | Signal recogniti P3710 | 2 | 1934 |         |        |        |        |         |         |
| FALSE | High | KGTVEGFEP, 1xCarbamidom    | FALSE | 0.000701 | 0 | 1 | 1  | 2 | P37108    | Signal recogniti P3710 | 2 | 1952 | 32665   | 31068  | 27.88  |        | 39889   | 26750   |
| FALSE | High | KIEIEKDFLLTAR              | FALSE | 0.076551 | 0 | 1 | 1  | 1 | P63173    | 60S ribosomal P6317    | 2 | 1576 | 32120   | 3044   | 40.21  |        | 32120   | 40624   |
| FALSE | High | KIIGLK                     | FALSE | 0.215356 | 0 | 1 | 1  | 1 | Q6IN85    | Serine/threonii Q6IN8  | 1 | 671  | 45555   | 33993  | 84.79  | 65.05  | 45555   | 97200   |
| FALSE | High | KTVTAMDVVYALK              | FALSE | 0.012775 | 0 | 1 | 1  | 1 | P62805    | Histone H4 OS= P6280   | 1 | 1439 | 11346   | 2288   | 76.79  |        | 11346   | 21791   |
| FALSE | High | KTVTAMDVVYALKR             | FALSE | 0.032077 | 0 | 1 | 1  | 5 | P62805    | Histone H4 OS= P6280   | 2 | 1595 | 88764   | 36117  | 101.78 | 67.33  | 88764   | 303079  |
| FALSE | High | KTVTAMDV 1xOxidation [N    | FALSE | 0.104548 | 0 | 1 | 1  | 1 | P62805    | Histone H4 OS= P6280   | 2 | 1611 | 20111   | 5468   | 51.55  | 38.45  | 20111   | 37315   |
| FALSE | High | KVHGSLAR                   | FALSE | 0.166505 | 0 | 1 | 1  | 1 | P62861    | 40S ribosomal P6286    | 1 | 868  | 74936   | 83412  | 16.74  | 20.48  | 66535   | 84399   |
| FALSE | High | KVPQVSTPTLVEVSR            | TRUE  | 0.014036 | 0 | 1 | 2  | 4 | cRAP087   | Serum albumin cRAP0    | 1 | 1640 | 185260  |        | 117.13 |        | 871682  | 185260  |
| FALSE | High | KYSQGNVSAVGVTYDGHTAL       | TRUE  | 0.000407 | 0 | 1 | 1  | 4 | cRAP117   | 000000 rLys-C cRAP1    | 1 | 2324 | 1580930 |        | 28.02  |        | 1580930 | 1856555 |
| FALSE | High | LAPDYDALDVANKIGII          | FALSE | 0.002689 | 0 | 1 | 1  | 2 | P62750    | 60S ribosomal P6275    | 1 | 1801 | 218603  | 117227 | 29.89  | 53.66  | 270929  | 176383  |
| FALSE | High | KATGPPVSEI 2xLabel:13C(6)  | FALSE | 0.021608 | 0 | 1 | 1  | 2 | P16401    | Histone H1.5 O P1640   | 1 | 1353 | 33945   | 45366  | 74.96  | 81.18  | 33945   | 64835   |
| FALSE | High | LGEHNIDVLEGNEQFINAAK       | TRUE  | 1.52E-05 | 0 | 1 | 1  | 4 | cRAP112   | Trypsin OS=Sus cRAP1   | 0 | 2211 | 4406445 |        | 20.84  |        | 4406445 | 5378594 |
| FALSE | High | LGGSAVISLE 1xLabel:13C(6)  | FALSE | 0.006476 | 0 | 1 | 1  | 1 | P23528    | Cofilin-1 OS=Hc P2352  | 0 | 1347 | 61157   | 13108  | 63.76  | 63.2   | 61157   | 130659  |
| FALSE | High | LGKDAVEDLESV GK            | FALSE | 0.002462 | 0 | 1 | 1  | 1 | P81605    | Dermcidin OS= P8160    | 1 | 1460 | 165687  |        | 52.44  |        | 165687  | 183755  |
| FALSE | High | IGLGRRGGSGGSYGR            | TRUE  | 0.13572  | 0 | 1 | 1  | 1 | P35527    | Keratin, type I P3552  | 1 | 1351 | 252094  |        | 39.69  |        | 252094  | 408383  |
| FALSE | High | LGIKSLVSKGLTLVQTK          | FALSE | 0.07438  | 0 | 1 | 1  | 1 | Q02539    | Histone H1.1 O Q0253   | 2 | 1672 | 24656   | 5970   | 87.01  | 105.48 | 12033   | 50520   |
| FALSE | High | IGRIEDVTPIF 2xLabel:13C(6) | FALSE | 0.065642 | 0 | 1 | 1  | 1 | P62263    | 40S ribosomal P6226    | 1 | 1768 | 39121   | 26261  | 40.16  | 27.37  | 39121   | 46093   |
| FALSE | High | LLCGLLAER 1xCarbamidom     | FALSE | 0.098757 | 0 | 1 | 1  | 2 | P14174    | Macrophage m P1417     | 0 | 1045 |         |        |        |        |         |         |
| FALSE | High | LLCGLLAER 1xCarbamidom     | FALSE | 0.053605 | 0 | 1 | 1  | 2 | P14174    | Macrophage m P1417     | 0 | 1051 | 34677   | 85209  | 81.91  | 73.26  | 34677   | 55912   |
| FALSE | High | LLDFGSLSNLQVTQPTVGMNI      | FALSE | 0.007795 | 0 | 1 | 1  | 1 | P08708    | 40S ribosomal P0870    | 1 | 2763 |         |        |        |        |         |         |
| FALSE | High | LLDFGSLSNL 2xLabel:13C(6)  | FALSE | 0.004601 | 0 | 1 | 1  | 1 | P08708    | 40S ribosomal P0870    | 1 | 2775 | 172097  | 99799  |        |        |         | 172097  |
| FALSE | High | ILDKVGINYWLAHK             | TRUE  | 0.090933 | 0 | 1 | 1  | 1 | cRAP075   | Alpha-lactalbur cRAP0  | 1 | 1670 | 29708   |        |        |        |         | 29708   |
| FALSE | High | LLLPGELAK                  | FALSE | 0.219233 | 0 | 2 | 15 | 1 | Q16778; C | Histone H2B ty Q1677   | 0 | 954  | 2627716 | 612357 | 101.01 | 75.31  | 2627716 | 9988036 |
| FALSE | High | LGEYGFQNALIVR              | TRUE  | 0.045475 | 0 | 1 | 1  | 2 | cRAP087   | Serum albumin cRAP0    | 0 | 1480 | 124285  |        | 105.04 |        | 323469  | 47754   |
| FALSE | High | KASGPPVSELITKAVAASK        | FALSE | 0.087527 | 0 | 2 | 3  | 1 | P16402; P | Histone H1.3 O P1640   | 2 | 1854 | 9793    | 6783   | 114.04 |        | 3206    | 29915   |
| FALSE | High | HQGLPQEVNLNENLLR           | TRUE  | 0.018079 | 0 | 1 | 1  | 2 | cRAP013   | Alpha-S1-caseii cRAP0  | 0 | 1760 | 47804   | 2263   | 10.36  | 42.51  | 42208   | 47804   |
| FALSE | High | HPIKHQGLPQEVNLNENLLR       | TRUE  | 0.012816 | 0 | 1 | 1  | 3 | cRAP013   | Alpha-S1-caseii cRAP0  | 1 | 2235 | 42857   |        | 148.64 |        | 42857   | 533554  |
| FALSE | High | GGLYGGPSY 1xCarbamidom     | TRUE  | 0.001813 | 0 | 1 | 1  | 4 | cRAP117   | 000000 rLys-C cRAP1    | 0 | 1728 | 735480  |        | 52.98  |        | 735480  | 820584  |
| FALSE | High | GGLYGGPSY 1xCarbamidom     | TRUE  | 0.001267 | 0 | 1 | 1  | 4 | cRAP117   | 000000 rLys-C cRAP1    | 1 | 3594 | 3031392 |        | 72.23  |        | 3031392 | 5823678 |
| FALSE | High | GGSGGSYGGGSGGGYGGG         | TRUE  | 0.000535 | 0 | 1 | 1  | 2 | P35527    | Keratin, type I P3552  | 0 | 1792 | 66413   |        | 25.68  |        | 66413   | 93609   |
| FALSE | High | GGISGGGYGSGGGK             | TRUE  | 0.007304 | 0 | 1 | 1  | 2 | P35908    | Keratin, type II P3590 | 0 | 1198 | 46680   |        | 82.59  |        | 47234   | 46680   |
| FALSE | High | GHYTEGAEL 1xLabel:13C(6)   | FALSE | 0.100016 | 0 | 1 | 5  | 1 | Q13885    | Tubulin beta-2/ Q1388  | 0 | 1965 |         |        |        |        |         |         |
| FALSE | High | GSCGIGGGK 1xCarbamidom     | FALSE | 0.013153 | 0 | 1 | 2  | 1 | P02533    | Keratin, type I P0253  | 0 | 1279 | 14203   |        | 71.97  |        | 12586   | 41901   |
| FALSE | High | GSLGGGFSSGGFSGGSFSR        | TRUE  | 0.000311 | 0 | 1 | 1  | 3 | P13645    | Keratin, type I P1364  | 0 | 1708 | 92047   | 173055 | 43.97  | 29.67  | 91286   | 185222  |
| FALSE | High | GTDVQAWIR                  | TRUE  | 0.063978 | 0 | 1 | 1  | 2 | cRAP078   | Lysozyme C OS cRAP0    | 0 | 1046 | 164414  |        | 46.85  |        | 164414  | 176477  |
| FALSE | High | GTGASGSFKLNK               | FALSE | 0.083177 | 0 | 4 | 5  | 1 | P16401; P | Histone H1.5 O P1640   | 1 | 1167 |         |        |        |        |         |         |
| FALSE | High | GTGASGSFK 2xLabel:13C(6)   | FALSE | 0.062355 | 0 | 4 | 5  | 1 | P16401; P | Histone H1.5 O P1640   | 1 | 1179 | 29971   | 20523  | 86.29  | 70.81  | 29971   | 82751   |
| FALSE | High | GYS LGNWV 1xCarbamidom     | TRUE  | 0.055717 | 0 | 1 | 1  | 2 | cRAP078   | Lysozyme C OS cRAP0    | 0 | 1326 | 48968   |        | 45.11  |        | 48968   | 72932   |

|       |      |                          |       |          |   |   |    |    |                                |   |      |         |        |        |        |         |         |  |
|-------|------|--------------------------|-------|----------|---|---|----|----|--------------------------------|---|------|---------|--------|--------|--------|---------|---------|--|
| FALSE | High | HAVSEGTKAVTK             | FALSE | 0.003004 | 0 | 2 | 15 | 5  | Q16778; C Histone H2B ty Q1677 | 1 | 1228 |         |        |        |        |         |         |  |
| FALSE | High | HAVSEGTKA 2xLabel:13C(6) | FALSE | 0.005704 | 0 | 2 | 15 | 2  | Q16778; C Histone H2B ty Q1677 | 1 | 1240 | 885742  | 211587 | 65.79  | 50.53  | 885742  | 1843801 |  |
| FALSE | High | HAVSEGTKAVTKYTSSK        | FALSE | 0.000642 | 0 | 2 | 12 | 13 | Q16778; C Histone H2B ty Q1677 | 2 | 1794 |         |        |        |        |         |         |  |
| FALSE | High | HAVSEGTKA 3xLabel:13C(6) | FALSE | 0.001581 | 0 | 2 | 12 | 5  | Q16778; C Histone H2B ty Q1677 | 2 | 1812 | 481919  | 168786 | 87.63  | 65.39  | 481919  | 1487311 |  |
| FALSE | High | HFNAPSHIR                | FALSE | 0.052073 | 0 | 1 | 1  | 1  | P61254 60S ribosomal P6125     | 0 | 1079 | 25730   | 3716   | 28.02  | 43.01  | 25730   | 36803   |  |
| FALSE | High | HGGGGGGFGGGGFGSR         | TRUE  | 0.000153 | 0 | 1 | 1  | 1  | P35908 Keratin, type II P3590  | 0 | 1321 | 96535   |        | 46.57  |        | 96535   | 152190  |  |
| FALSE | High | HGLDNRYRGY 1xCarbamidom  | TRUE  | 0.030955 | 0 | 1 | 1  | 2  | cRAP078 Lysozyme C OS cRAP0    | 1 | 2181 | 96497   |        | 46.92  |        | 96497   | 100397  |  |
| FALSE | High | HGSSSGSSSHYGQHGSGSR      | FALSE | 0.021469 | 0 | 1 | 1  | 1  | Q86YZ3 Hornerin OS=H Q86YZ     | 0 | 1859 | 13039   |        | 79.16  |        | 13039   | 40302   |  |
| FALSE | High | HGSSSGSSRYGQHGSGSR       | FALSE | 0.061165 | 0 | 1 | 1  | 1  | Q86YZ3 Hornerin OS=H Q86YZ     | 1 | 1878 | 34149   |        | 12.64  |        | 28548   | 34149   |  |
| FALSE | High | HIQKEDVPSEER             | TRUE  | 0.021123 | 0 | 1 | 1  | 1  | cRAP013 Alpha-S1-casein cRAP0  | 1 | 1338 | 44798   |        | 117.77 |        | 44798   | 215258  |  |
| FALSE | High | HIQKEDVPSEERYLGYLEQLLR   | TRUE  | 0.103889 | 0 | 1 | 1  | 1  | cRAP013 Alpha-S1-casein cRAP0  | 2 | 2586 |         |        |        |        |         |         |  |
| FALSE | High | HLQLAIRNDEELNK           | FALSE | 0.18926  | 0 | 2 | 12 | 1  | Q16777; C Histone H2A ty Q1677 | 1 | 1693 | 21207   | 11584  | 92.94  |        | 21207   | 73765   |  |
| FALSE | High | HLQLAIRNDEELNKLLGK       | FALSE | 0.124331 | 0 | 1 | 7  | 3  | Q16777 Histone H2A ty Q1677    | 2 | 2104 | 207668  | 18197  | 118.37 | 129.22 | 61860   | 697159  |  |
| FALSE | High | HLQLAIRNDEELNKLLGR       | FALSE | 0.005292 | 0 | 1 | 3  | 3  | Q93077 Histone H2A ty Q7L7L    | 2 | 2132 | 43796   | 6625   | 143.36 | 124.95 | 43796   | 485860  |  |
| FALSE | High | YRPGTVALREIR             | FALSE | 0.112779 | 0 | 1 | 5  | 1  | P84243 Histone H3.3 O P8424    | 1 | 1431 | 112468  | 10540  | 40.39  | 55.76  | 112468  | 193060  |  |
| FALSE | High | YSQGNVSAVGVTYDGHALT      | TRUE  | 0.000325 | 0 | 1 | 1  | 6  | cRAP117 000000 rLys-C cRAP1    | 0 | 2196 | 1920979 |        | 41.65  |        | 1920979 | 2432481 |  |



| Abundance | F      | Abundance | Abundance | Abundance | Precur | Quan  | I      | Quan   | I      | Found  | Found  | Found  | Found  | Found | Found    | Found    | Confid | Perc | Percolator | XCorr | Top Apex | RT in min |
|-----------|--------|-----------|-----------|-----------|--------|-------|--------|--------|--------|--------|--------|--------|--------|-------|----------|----------|--------|------|------------|-------|----------|-----------|
| 23168     |        |           |           |           | 1      | Light | Peak F | High   | Peak F | Not Fc | Not Fc | Not Fc | Not Fc | High  | 0        | 3.13E-06 | 7.29   | 67.8 |            |       |          |           |
| 163748    |        |           |           |           | 123    | Light | High   | High   | Peak F | Not Fc | Not Fc | Not Fc | Not Fc | High  | 0        | 0.00028  | 6.09   | 139  |            |       |          |           |
|           |        |           |           |           | 124    | NoQu  | Light  | Not Fc | High   | Not Fc | Not Fc | Not Fc | Not Fc | High  | 0        | 0.02643  | 4.26   |      |            |       |          |           |
| 84944     | 37923  | 104363    | 26050     |           | 125    | NotUn | Light  | High   | High   | Peak F | Peak F | Peak F | Peak F | High  | 0        | 0.06103  | 2.52   | 39.1 |            |       |          |           |
| 3468      |        |           |           |           | 126    | Light | Peak F | High   | Peak F | Not Fc | Not Fc | Not Fc | Not Fc | High  | 0        | 0.0424   | 2.57   | 139  |            |       |          |           |
| 19315187  |        |           |           |           | 127    | Light | High   | High   | Peak F | Not Fc | Not Fc | Not Fc | Not Fc | High  | 0        | 0.02148  | 2.61   | 122  |            |       |          |           |
| 1121212   |        |           |           |           | 128    | Light | High   | High   | Peak F | Not Fc | Not Fc | Not Fc | Not Fc | High  | 0        | 0.008106 | 4.03   | 102  |            |       |          |           |
| 157247    |        |           |           |           | 129    | Light | High   | High   | Peak F | Not Fc | Not Fc | Not Fc | Not Fc | High  | 0        | 0.02475  | 3.27   | 122  |            |       |          |           |
| 21055     | 12398  | 23198     |           |           | 130    | NotUn | Light  | Peak F | High   | Peak F | Peak F | Peak F | Not Fc | High  | 0        | 0.04304  | 3.41   | 76.6 |            |       |          |           |
| 355040    |        |           |           |           | 131    | Light | High   | High   | Peak F | Not Fc | Not Fc | Not Fc | Not Fc | High  | 0        | 0.001513 | 3.9    | 57.3 |            |       |          |           |
| 34292     |        |           |           |           | 132    | Light | High   | High   | Peak F | Not Fc | Not Fc | Not Fc | Not Fc | High  | 0        | 0.01574  | 3.22   | 38.8 |            |       |          |           |
| 62438     |        |           |           |           | 133    | Light | High   | High   | Peak F | Not Fc | Not Fc | Not Fc | Not Fc | High  | 0        | 0.01875  | 2.61   | 59.5 |            |       |          |           |
|           |        |           |           |           | 122    | Light | Peak F | High   | Not Fc | Not Fc | Not Fc | Not Fc | Not Fc | High  | 0        | 0.01459  | 3.7    | 129  |            |       |          |           |
| 2556      | 3242   | 15560     |           |           | 134    | Light | High   | High   | Peak F | Peak F | Peak F | Not Fc | High   | 0     | 0.000621 | 4.46     | 129    |      |            |       |          |           |
| 15344767  |        |           |           |           | 136    | Light | High   | High   | Peak F | Not Fc | Not Fc | Not Fc | Not Fc | High  | 0        | 4.98E-05 | 4.69   | 131  |            |       |          |           |
| 57003     | 38401  | 56439     | 19169     |           | 137    | Heavy | Peak F | Peak F | Peak F | Peak F | High   | Peak F | High   | 0     | 0.1199   | 2.81     | 54     |      |            |       |          |           |
| 225447    | 100357 | 134489    | 66693     |           | 138    | Light | High   | High   | Peak F | Peak F | Peak F | Peak F | High   | 0     | 0.03859  | 3.25     | 108    |      |            |       |          |           |
| 59008     | 24640  | 25794     | 14745     |           | 139    | Light | High   | High   | Peak F | Peak F | Peak F | Peak F | High   | 0     | 0.01875  | 3.06     | 92.2   |      |            |       |          |           |
|           |        | 55908     |           |           | 140    | Heavy | Not Fc | Peak F | Not Fc | Not Fc | High   | Not Fc | High   | 0     | 0.1559   | 2.71     | 197    |      |            |       |          |           |
| 302365    |        |           |           |           | 141    | Light | Peak F | High   | Peak F | Not Fc | Not Fc | Not Fc | Not Fc | High  | 0        | 4.05E-05 | 5.92   | 143  |            |       |          |           |
| 27581     |        |           |           |           | 142    | Light | High   | High   | Peak F | Not Fc | Not Fc | Not Fc | Not Fc | High  | 0        | 0.004578 | 3.3    | 48.7 |            |       |          |           |
|           |        |           |           |           | 143    | NoQu  | Light  | Not Fc | High   | Not Fc | Not Fc | Not Fc | Not Fc | High  | 0        | 0.01356  | 4.25   |      |            |       |          |           |
| 9400      |        |           |           |           | 144    | Light | Peak F | High   | Peak F | Not Fc | Not Fc | Not Fc | Not Fc | High  | 0        | 0.02266  | 4.12   | 122  |            |       |          |           |
| 19373     |        |           |           |           | 145    | Light | Peak F | High   | Peak F | Not Fc | Not Fc | Not Fc | Not Fc | High  | 0        | 3.09E-05 | 5.64   | 56.1 |            |       |          |           |
| 124955    |        |           |           |           | 146    | Light | High   | High   | Peak F | Not Fc | Not Fc | Not Fc | Not Fc | High  | 0        | 0.0001   | 4.68   | 56.3 |            |       |          |           |
| 548263    |        |           |           |           | 135    | Light | High   | High   | Peak F | Not Fc | Not Fc | Not Fc | Not Fc | High  | 0        | 0.003503 | 2.94   | 139  |            |       |          |           |
| 10906     |        | 21348     |           |           | 147    | NotUn | Light  | Peak F | High   | Peak F | Not Fc | Peak F | Not Fc | High  | 0        | 0.03315  | 3.16   | 102  |            |       |          |           |
|           |        |           |           |           | 121    | Light | Not Fc | High   | Not Fc | Not Fc | Not Fc | Not Fc | Not Fc | High  | 0        | 0.108    | 2.88   | 118  |            |       |          |           |
|           |        |           |           |           | 119    | NoQu  | Light  | Not Fc | High   | Not Fc | Not Fc | Not Fc | Not Fc | High  | 0        | 0.1382   | 2.61   |      |            |       |          |           |
| 624786    |        |           |           |           | 98     | Light | High   | High   | Peak F | Not Fc | Not Fc | Not Fc | Not Fc | High  | 0        | 0.02013  | 4.27   | 186  |            |       |          |           |
| 27339     |        |           |           |           | 99     | Light | High   | High   | Peak F | Not Fc | Not Fc | Not Fc | Not Fc | High  | 0        | 0.03167  | 4.07   | 160  |            |       |          |           |
| 79432     | 11782  | 18234     | 9604      |           | 100    | Light | Peak F | High   | Peak F | Peak F | Peak F | Peak F | High   | 0     | 0.1803   | 1.77     | 40.2   |      |            |       |          |           |
| 3362      |        |           |           |           | 101    | Light | Peak F | High   | Peak F | Not Fc | Not Fc | Not Fc | Not Fc | High  | 0        | 0.06747  | 1.84   | 43.6 |            |       |          |           |
| 17022     |        | 2595      |           |           | 102    | Light | High   | High   | Peak F | Not Fc | Peak F | Not Fc | Not Fc | High  | 0        | 0.152    | 2.13   | 43.6 |            |       |          |           |
| 231603    | 13043  | 43552     | 16336     |           | 103    | Light | High   | High   | Peak F | Peak F | Peak F | Peak F | High   | 0     | 0.01109  | 3.74     | 114    |      |            |       |          |           |
|           |        |           |           |           | 104    | NoQu  | Light  | Not Fc | High   | Not Fc | Not Fc | Not Fc | Not Fc | High  | 0        | 0.09213  | 3.13   |      |            |       |          |           |
| 4391      |        |           |           |           | 105    | Light | Not Fc | High   | Peak F | Not Fc | Not Fc | Not Fc | Not Fc | High  | 0        | 0.05073  | 3.07   | 201  |            |       |          |           |
| 1593014   |        |           |           |           | 106    | Light | High   | High   | Peak F | Not Fc | Not Fc | Not Fc | Not Fc | High  | 0        | 0.08015  | 2.41   | 71.4 |            |       |          |           |
|           |        | 20367     |           |           | 107    | Heavy | Peak F | Peak F | Not Fc | Not Fc | High   | Not Fc | High   | 0     | 0.03166  | 3.14     | 159    |      |            |       |          |           |
|           |        |           |           |           | 108    | Heavy | Peak F | Peak F | Not Fc | Not Fc | High   | Not Fc | High   | 0     | 0.08304  | 2.94     | 208    |      |            |       |          |           |

|          |        |        |       |     |                |             |               |        |        |        |        |         |         |          |          |      |      |
|----------|--------|--------|-------|-----|----------------|-------------|---------------|--------|--------|--------|--------|---------|---------|----------|----------|------|------|
| 3536     |        |        |       | 120 | Light          | Peak F High | Peak F Not Fc | Not Fc | Not Fc | High   | 0      | 0.01065 | 3.17    | 123      |          |      |      |
|          |        |        |       |     | Indistinguish: | Not Fc      | Not Fc        | Not Fc | Not Fc | Not Fc | High   | 0       | 0.04301 | 3.19     | 131      |      |      |
|          | 8558   | 28287  | 4309  | 110 | Light          | Not Fc      | High          | Not Fc | Peak F | Peak F | Peak F | High    | 0       | 0.1249   | 2.84     | 182  |      |
|          |        |        |       | 110 | Redun          | Heavy       | Not Fc        | Peak F | Not Fc | Peak F | High   | Peak F  | High    | 0        | 0.02033  | 4.11 | 182  |
| 8787     | 3589   | 5948   |       | 111 | Light          | Peak F High | Peak F        | Peak F | Peak F | Not Fc | High   | 0       | 0.1337  | 2.25     | 123      |      |      |
|          |        |        |       | 112 | Redun          | Light       | Peak F High   | Peak F | Not Fc | Peak F | Not Fc | High    | 0       | 0.03466  | 3.2      | 172  |      |
| 3994     |        | 29166  |       | 112 | Heavy          | Peak F      | Peak F        | Peak F | Not Fc | High   | Not Fc | High    | 0       | 0.002284 | 4        | 172  |      |
| 10457346 |        | 54587  | 13640 | 113 | High           | High        | Peak F        | Not Fc | Peak F | Peak F | Peak F | High    | 0       | 1.32E-05 | 6.33     | 167  |      |
| 230886   |        | 44180  |       | 114 | Light          | High        | High          | Peak F | Not Fc | Peak F | Not Fc | High    | 0       | 2.57E-05 | 7.23     | 157  |      |
| 12082    |        | 12267  | 9557  | 115 | Light          | Peak F High | Peak F        | Not Fc | Peak F | Peak F | High   | 0       | 0.1206  | 2.71     | 120      |      |      |
| 991696   |        |        |       | 116 | Light          | High        | High          | Peak F | Not Fc | Not Fc | Not Fc | High    | 0       | 7.71E-05 | 5.2      | 190  |      |
|          |        | 34387  |       | 117 | Heavy          | Not Fc      | Peak F        | Not Fc | Not Fc | High   | Not Fc | High    | 0       | 0.08393  | 2.97     | 168  |      |
| 628974   | 3519   | 7756   | 3636  | 118 | Light          | High        | High          | Peak F | Peak F | Peak F | Peak F | High    | 0       | 0.000577 | 5.4      | 181  |      |
|          |        |        |       | 109 | NoQu:          | Light       | Not Fc        | High   | Not Fc | Not Fc | Not Fc | Not Fc  | High    | 0        | 0.1125   | 2.92 |      |
| 210242   |        |        |       | 97  | Light          | High        | High          | Peak F | Not Fc | Not Fc | Not Fc | High    | 0       | 0.03048  | 3.6      | 161  |      |
| 17588    | 29407  | 58444  | 13639 | 148 | NotUn          | Light       | Peak F High   | Peak F | Peak F | Peak F | Peak F | High    | 0       | 0.009329 | 2.91     | 76.7 |      |
|          |        |        |       | 150 | Light          | Peak F High | Not Fc        | Not Fc | Not Fc | Not Fc | Not Fc | High    | 0       | 0.006451 | 4.3      | 199  |      |
| 13783602 |        |        |       | 177 | Light          | Peak F High | Peak F        | Not Fc | Not Fc | Not Fc | Not Fc | High    | 0       | 0.04979  | 1.78     | 88.7 |      |
|          |        |        |       |     | Indistinguish: | Not Fc      | Not Fc        | Not Fc | Not Fc | Not Fc | Not Fc | Not Fc  | High    | 0        | 0.04256  | 3.55 | 218  |
| 568199   |        |        |       | 178 | Light          | High        | High          | Peak F | Not Fc | Not Fc | Not Fc | High    | 0       | 6.65E-05 | 6.73     | 204  |      |
|          |        |        |       | 179 | NoQu:          | Light       | Not Fc        | High   | Not Fc | Not Fc | Not Fc | Not Fc  | High    | 0        | 0.05332  | 5.54 |      |
| 29964    | 56631  | 75997  | 37600 | 180 | Light          | Peak F High | Peak F        | Peak F | Peak F | Peak F | Peak F | High    | 0       | 0.04566  | 3.23     | 110  |      |
| 19336    | 4162   | 25009  | 6471  | 181 | Light          | Peak F High | Peak F        | Peak F | Peak F | Peak F | Peak F | High    | 0       | 0.07128  | 2.88     | 141  |      |
| 73603    | 55063  | 76188  | 49442 | 182 | Light          | High        | High          | Peak F | Peak F | Peak F | Peak F | High    | 0       | 0.03848  | 3.57     | 191  |      |
| 69665    | 1635   | 3428   | 987   | 183 | Light          | Peak F High | Peak F        | Peak F | Peak F | Peak F | Peak F | High    | 0       | 0.05088  | 2.9      | 58.9 |      |
| 52462    | 25057  | 42263  | 15723 | 184 | NotUn          | Light       | High          | High   | Peak F | Peak F | Peak F | Peak F  | High    | 0        | 0.04275  | 2.46 | 55.1 |
|          |        |        |       | 185 | Light          | Peak F High | Not Fc        | Not Fc | Not Fc | Not Fc | Not Fc | High    | 0       | 0.1583   | 2.64     | 109  |      |
| 323708   | 127857 | 543409 |       | 186 | NotUn          | Light       | High          | High   | Peak F | Peak F | Peak F | Not Fc  | High    | 0        | 5.55E-05 | 4.58 | 207  |
| 21820    | 7432   | 15908  |       | 176 | Light          | Peak F High | Peak F        | Peak F | Peak F | Peak F | Not Fc | High    | 0       | 0.01094  | 3.45     | 131  |      |
|          |        |        |       | 186 | Redun          | Heavy       | Peak F        | Peak F | Peak F | High   | High   | Not Fc  | High    | 0        | 0.1554   | 2.54 | 207  |
| 4078     |        |        |       | 188 | Light          | Peak F High | Peak F        | Not Fc | Not Fc | Not Fc | Not Fc | High    | 0       | 0.04484  | 2.48     | 157  |      |
| 91583    | 37362  | 79918  | 26061 | 189 | Light          | High        | High          | Peak F | Peak F | Peak F | Peak F | High    | 0       | 0.08271  | 2.48     | 123  |      |
|          |        |        |       | 190 | Light          | Peak F High | Not Fc        | Not Fc | Not Fc | Not Fc | Not Fc | High    | 0       | 0.09064  | 2.25     | 88.7 |      |
| 72907    |        |        |       | 191 | Light          | Peak F High | Peak F        | Not Fc | Not Fc | Not Fc | Not Fc | High    | 0       | 0.03936  | 3.14     | 84.4 |      |
|          | 49149  | 69316  | 15393 | 192 | Heavy          | Not Fc      | Not Fc        | Not Fc | High   | High   | Peak F | High    | 0       | 0.088    | 3.16     | 150  |      |
| 45422    | 23967  | 47511  | 20935 | 193 | Light          | High        | High          | Peak F | Peak F | Peak F | Peak F | High    | 0       | 0.04856  | 3.37     | 116  |      |
|          |        |        |       | 193 | Redun          | Heavy       | Peak F        | Peak F | Peak F | Peak F | High   | Peak F  | High    | 0        | 0.138    | 3.04 | 116  |
| 246882   |        | 1500   |       | 194 | Light          | Peak F High | Peak F        | Not Fc | Peak F | Peak F | Not Fc | High    | 0       | 0.02723  | 3.58     | 65   |      |
| 121464   | 1063   | 3229   |       | 195 | Light          | High        | High          | Peak F | Peak F | Peak F | Peak F | Not Fc  | High    | 0        | 0.1609   | 3.1  | 54.1 |
| 10337    | 24367  | 40152  |       | 196 | Light          | High        | High          | Peak F | Peak F | Peak F | Not Fc | High    | 0       | 0.02219  | 3.58     | 194  |      |
| 189252   | 35127  | 110507 | 31009 | 197 | Light          | Peak F High | Peak F        | Peak F | Peak F | Peak F | Peak F | High    | 0       | 0.1131   | 2.12     | 66.2 |      |
|          |        | 2674   |       | 187 | Light          | Peak F High | Not Fc        | Not Fc | Peak F | Not Fc | Not Fc | High    | 0       | 0.004162 | 2.68     | 146  |      |

|         |        |        |       |     |                |        |        |        |        |        |        |        |      |   |          |      |      |
|---------|--------|--------|-------|-----|----------------|--------|--------|--------|--------|--------|--------|--------|------|---|----------|------|------|
|         |        | 37742  |       | 149 | NotUn          | Heavy  | Not Fc | Peak F | Not Fc | Not Fc | High   | Not Fc | High | 0 | 0.02762  | 4.39 | 177  |
|         |        |        |       | 175 |                | Light  | Peak F | High   | Not Fc | Not Fc | Not Fc | Not Fc | High | 0 | 0.03207  | 1.8  | 98.9 |
| 24791   | 7653   | 24064  | 1862  | 173 |                | Light  | Peak F | High   | Peak F | Peak F | Peak F | Peak F | High | 0 | 0.07133  | 3.66 | 147  |
| 369769  |        |        |       | 151 |                | Light  | Peak F | High   | Peak F | Not Fc | Not Fc | Not Fc | High | 0 | 0.07522  | 1.97 | 88.6 |
| 552575  |        |        |       | 152 |                | Light  | High   | High   | Peak F | Not Fc | Not Fc | Not Fc | High | 0 | 0.04151  | 2.07 | 85.4 |
| 23151   |        |        |       | 153 |                | Light  | Peak F | High   | Peak F | Not Fc | Not Fc | Not Fc | High | 0 | 0.01995  | 4.02 | 135  |
| 61459   |        |        |       | 154 |                | Light  | High   | High   | Peak F | Not Fc | Not Fc | Not Fc | High | 0 | 0.009108 | 3.27 | 186  |
|         |        |        |       | 155 |                | Light  | Peak F | High   | Not Fc | Not Fc | Not Fc | Not Fc | High | 0 | 0.00303  | 4.44 | 170  |
|         |        |        |       | 156 |                | Light  | Not Fc | High   | Not Fc | Not Fc | Not Fc | Not Fc | High | 0 | 0.004504 | 4.57 | 164  |
| 39917   | 5587   | 13552  | 7174  | 157 |                | Light  | Peak F | High   | Peak F | Peak F | Peak F | Peak F | High | 0 | 0.06516  | 3.02 | 96.2 |
| 22980   |        |        |       | 158 |                | Light  | Peak F | High   | Peak F | Not Fc | Not Fc | Not Fc | High | 0 | 0.000146 | 4.84 | 69.3 |
|         |        |        |       | 159 | NoQu:          | Light  | Not Fc | High   | Not Fc | Not Fc | Not Fc | Not Fc | High | 0 | 0.1119   | 2.22 |      |
| 19980   |        |        |       | 160 |                | Light  | Peak F | High   | Peak F | Not Fc | Not Fc | Not Fc | High | 0 | 0.07319  | 2.65 | 74.4 |
| 466167  | 87946  | 242246 | 41164 | 161 |                | Light  | Peak F | High   | Peak F | Peak F | Peak F | Peak F | High | 0 | 0.1209   | 2.25 | 94.3 |
| 9186    | 3841   | 8662   |       | 174 |                | Light  | Peak F | High   | Peak F | Peak F | Peak F | Not Fc | High | 0 | 0.09912  | 3.19 | 154  |
| 235097  | 126464 | 227966 | 96848 | 162 |                | Light  | High   | High   | Peak F | Peak F | Peak F | Peak F | High | 0 | 0.009689 | 3.12 | 82.1 |
| 83690   |        |        |       | 163 |                | Light  | High   | High   | Peak F | Not Fc | Not Fc | Not Fc | High | 0 | 0.06342  | 3.1  | 80.7 |
| 12896   | 7964   | 10126  |       | 164 |                | Light  | High   | High   | Peak F | Peak F | Peak F | Not Fc | High | 0 | 0.000942 | 3.51 | 164  |
| 14557   |        |        |       | 165 |                | Light  | Peak F | High   | Peak F | Not Fc | Not Fc | Not Fc | High | 0 | 0.05998  | 2.42 | 77.1 |
| 12856   |        |        |       | 166 |                | Light  | Peak F | High   | Peak F | Not Fc | Not Fc | Not Fc | High | 0 | 0.1491   | 3.35 | 133  |
|         |        |        |       | 167 | NoQu:          | Light  | Not Fc | High   | Not Fc | Not Fc | Not Fc | Not Fc | High | 0 | 0.1289   | 2.3  |      |
|         |        | 7440   |       | 168 |                | Light  | Not Fc | High   | Not Fc | Not Fc | Peak F | Not Fc | High | 0 | 0.1661   | 2.29 | 171  |
| 136694  |        |        |       | 169 |                | Light  | High   | High   | Peak F | Not Fc | Not Fc | Not Fc | High | 0 | 0.001429 | 4.84 | 151  |
| 509669  |        |        |       | 170 |                | Light  | High   | High   | Peak F | Not Fc | Not Fc | Not Fc | High | 0 | 0.02567  | 2.39 | 142  |
| 179152  |        |        |       | 171 |                | Light  | High   | High   | Peak F | Not Fc | Not Fc | Not Fc | High | 0 | 0.006794 | 3.46 | 134  |
|         |        |        |       |     | NoQuan         | Valur  | Not Fc | Not Fc | Not Fc | Not Fc | Not Fc | Not Fc | High | 0 | 0.1213   | 2.6  |      |
| 24291   | 8172   | 43122  | 8404  | 172 |                | Heavy  | Peak F | Peak F | Peak F | Peak F | High   | Peak F | High | 0 | 0.1803   | 3.25 | 173  |
|         |        |        |       | 162 | Redun          | Heavy  | Peak F | Peak F | Peak F | Peak F | High   | Peak F | High | 0 | 0.02771  | 3.46 | 82.1 |
| 2062590 |        |        |       | 96  |                | Light  | High   | High   | Peak F | Not Fc | Not Fc | Not Fc | High | 0 | 0.000654 | 5.24 | 169  |
| 63723   | 15202  | 30280  | 10145 | 95  | NotUn          | Light  | High   | High   | Peak F | Peak F | Peak F | Peak F | High | 0 | 0.04962  | 3.22 | 36.9 |
|         |        |        |       |     | Inconsistent   | h      | Not Fc | Not Fc | Not Fc | Not Fc | Not Fc | Not Fc | High | 0 | 0.1597   | 2.58 | 124  |
| 416384  |        |        |       | 23  |                | Light  | High   | High   | Peak F | Not Fc | Not Fc | Not Fc | High | 0 | 6.81E-05 | 7.98 | 200  |
|         |        |        |       | 24  | NoQu:          | Light  | Not Fc | High   | Not Fc | Not Fc | Not Fc | Not Fc | High | 0 | 0.08798  | 4.1  |      |
| 52641   |        |        |       | 25  |                | Light  | Peak F | High   | Peak F | Not Fc | Not Fc | Not Fc | High | 0 | 0.0592   | 2.53 | 61.1 |
| 104562  | 24628  | 26939  | 18137 | 26  |                | Light  | High   | High   | Peak F | Peak F | Peak F | Peak F | High | 0 | 0.02262  | 3.94 | 68.6 |
| 122036  |        |        |       | 27  |                | Light  | High   | High   | Peak F | Not Fc | Not Fc | Not Fc | High | 0 | 0.0807   | 3.25 | 120  |
| 33988   |        |        |       | 28  |                | Light  | Peak F | High   | Peak F | Not Fc | Not Fc | Not Fc | High | 0 | 0.04354  | 2.74 | 127  |
| 93596   |        |        |       | 29  |                | Light  | High   | High   | Peak F | Not Fc | Not Fc | Not Fc | High | 0 | 0.01214  | 3.57 | 116  |
| 191385  |        |        |       | 30  |                | Light  | High   | High   | Peak F | Not Fc | Not Fc | Not Fc | High | 0 | 2.72E-06 | 7.62 | 122  |
| 30522   |        |        |       | 31  |                | Light  | High   | High   | Peak F | Not Fc | Not Fc | Not Fc | High | 0 | 0.000547 | 5.6  | 148  |
|         |        |        |       |     | Indistinguish: | Not Fc | Not Fc | Not Fc | Not Fc | Not Fc | Not Fc | Not Fc | High | 0 | 0.1189   | 2.62 | 79.9 |
| 168601  | 51605  | 131744 | 33410 | 32  |                | Light  | High   | High   | Peak F | Peak F | Peak F | Peak F | High | 0 | 0.01521  | 3.71 | 90.3 |

|         |        |         |        |    |             |        |        |        |        |        |        |      |   |          |      |      |
|---------|--------|---------|--------|----|-------------|--------|--------|--------|--------|--------|--------|------|---|----------|------|------|
| 5192565 | 1424   |         |        | 22 | Light       | High   | High   | Peak F | Peak F | Not Fc | Not Fc | High | 0 | 0.001971 | 4.02 | 60.9 |
| 43830   | 4769   | 2594    |        | 33 | Light       | High   | High   | Peak F | Peak F | Peak F | Not Fc | High | 0 | 0.109    | 2.6  | 157  |
|         |        |         |        | 34 | Light       | Not Fc | High   | Not Fc | Not Fc | Not Fc | Not Fc | High | 0 | 0.1409   | 2.3  | 193  |
|         |        |         |        | 36 | NoQu: Light | Not Fc | High   | Not Fc | Not Fc | Not Fc | Not Fc | High | 0 | 0.0155   | 4.54 |      |
| 448355  | 167250 | 732087  | 171849 | 37 | Light       | High   | High   | Peak F | Peak F | Peak F | Peak F | High | 0 | 0.02255  | 3.01 | 171  |
|         |        |         |        | 37 | Redun Heavy | Peak F | Peak F | Peak F | Peak F | High   | Peak F | High | 0 | 0.008486 | 3.92 | 171  |
| 6111    | 4103   | 33086   |        | 38 | Light       | Peak F | High   | Peak F | Peak F | Peak F | Not Fc | High | 0 | 0.1342   | 2.75 | 162  |
|         |        |         |        | 38 | Redun Heavy | Peak F | Peak F | Peak F | Peak F | High   | Not Fc | High | 0 | 0.1315   | 3.29 | 162  |
| 59774   |        |         |        | 39 | Light       | High   | High   | Peak F | Not Fc | Not Fc | Not Fc | High | 0 | 0.004956 | 4.05 | 82.5 |
| 3379    |        |         |        | 40 | Light       | Peak F | High   | Peak F | Not Fc | Not Fc | Not Fc | High | 0 | 0.1162   | 2.45 | 76.5 |
| 189930  |        |         |        | 41 | Light       | Peak F | High   | Peak F | Not Fc | Not Fc | Not Fc | High | 0 | 0.1148   | 3.14 | 208  |
| 96593   |        |         |        | 42 | Light       | Peak F | High   | Peak F | Not Fc | Not Fc | Not Fc | High | 0 | 0.00293  | 3.6  | 180  |
|         |        |         |        | 43 | Light       | Not Fc | High   | Not Fc | Not Fc | Not Fc | Not Fc | High | 0 | 0.002157 | 5.03 | 175  |
|         |        |         |        | 35 | NoQu: Light | Not Fc | High   | Not Fc | Not Fc | Not Fc | Not Fc | High | 0 | 0.07597  | 3.45 |      |
| 117270  |        |         |        | 44 | Light       | High   | High   | Peak F | Not Fc | Not Fc | Not Fc | High | 0 | 0.000369 | 5.17 | 110  |
| 37378   | 38421  | 108148  | 29927  | 21 | NotUn Light | High   | High   | Peak F | Peak F | Peak F | Peak F | High | 0 | 0.03236  | 3.33 | 11.5 |
|         | 30348  | 49691   | 18072  | 19 | Heavy       | Not Fc | Not Fc | Not Fc | Peak F | High   | Peak F | High | 0 | 0.01237  | 3.06 | 165  |
| 87795   | 43474  | 98320   | 27340  | 2  | Light       | Peak F | High   | Peak F | Peak F | Peak F | Peak F | High | 0 | 0.01249  | 2.91 | 62.7 |
|         |        |         |        | 2  | Redun Heavy | Peak F | Peak F | Peak F | High   | High   | Peak F | High | 0 | 0.01206  | 3.54 | 62.7 |
| 4118    | 4484   | 8301    |        | 3  | Light       | Peak F | High   | Peak F | Peak F | Peak F | Not Fc | High | 0 | 0.06515  | 3.76 | 139  |
| 1309885 | 508858 | 1171630 | 319268 | 4  | NotUn Light | Peak F | High   | Peak F | Peak F | Peak F | Peak F | High | 0 | 0.009526 | 2.91 | 121  |
|         |        |         |        | 5  | Redun Light | Peak F | High   | Peak F | Peak F | Peak F | Peak F | High | 0 | 0.06864  | 2.04 | 93.8 |
| 91618   | 39685  | 61483   | 24164  | 5  | NotUn Heavy | Peak F | Peak F | Peak F | Peak F | High   | Peak F | High | 0 | 0.127    | 2.65 | 93.8 |
| 7244246 |        |         |        | 6  | Light       | High   | High   | Peak F | Not Fc | Not Fc | Not Fc | High | 0 | 8.24E-06 | 6.76 | 113  |
| 7345876 |        |         |        | 7  | Light       | High   | High   | Peak F | Not Fc | Not Fc | Not Fc | High | 0 | 2.02E-06 | 7.78 | 138  |
| 2814656 |        |         |        | 8  | Light       | Peak F | High   | Peak F | Not Fc | Not Fc | Not Fc | High | 0 | 0.1528   | 2.44 | 115  |
| 11393   | 3658   | 8527    |        | 9  | Light       | Not Fc | High   | Peak F | Peak F | Peak F | Not Fc | High | 0 | 0.003782 | 3.55 | 11.7 |
| 9796    | 4392   | 12386   | 3401   | 10 | Light       | Peak F | High   | Peak F | Peak F | Peak F | Peak F | High | 0 | 0.03959  | 4.52 | 11.4 |
|         | 37469  | 94931   | 21558  | 20 | Heavy       | Peak F | Peak F | Not Fc | High   | High   | Peak F | High | 0 | 0.01676  | 3.05 | 189  |
| 28815   | 22797  | 99712   | 17269  | 11 | NotUn Light | Peak F | High   | Peak F | Peak F | Peak F | Peak F | High | 0 | 0.004668 | 3.48 | 87.1 |
|         |        |         |        | 12 | Redun Heavy | Peak F | Peak F | Peak F | Peak F | High   | Peak F | High | 0 | 0.09676  | 2.12 | 72.2 |
| 16837   |        |         |        | 13 | Light       | High   | High   | Peak F | Not Fc | Not Fc | Not Fc | High | 0 | 0.008592 | 3.56 | 169  |
| 63941   |        | 66805   |        | 14 | NotUn Light | High   | High   | Peak F | Not Fc | Peak F | Not Fc | High | 0 | 0.000834 | 4.97 | 217  |
|         |        |         |        | 14 | Redun Heavy | Peak F | Peak F | Peak F | Not Fc | High   | Not Fc | High | 0 | 0.03339  | 4.02 | 217  |
| 355563  | 98456  | 684411  | 72713  | 15 | NotUn Light | High   | High   | Peak F | Peak F | Peak F | Peak F | High | 0 | 2.77E-05 | 5.91 | 205  |
|         |        |         |        | 15 | Redun Heavy | Peak F | Peak F | Peak F | Peak F | High   | Peak F | High | 0 | 0.03449  | 4.5  | 204  |
| 72578   | 5611   | 147817  | 19662  | 16 | NotUn Light | Peak F | High   | Peak F | Peak F | Peak F | Peak F | High | 0 | 0.003479 | 5.31 | 178  |
|         |        |         |        | 16 | Redun Heavy | Peak F | Peak F | Peak F | Peak F | High   | Peak F | High | 0 | 0.005035 | 4.94 | 177  |
| 6428    |        |         |        | 17 | Light       | Peak F | High   | Peak F | Not Fc | Not Fc | Not Fc | High | 0 | 0.1102   | 2.31 | 81.9 |
|         |        |         |        | 18 | Redun Light | Peak F | High   | Peak F | Peak F | Peak F | Peak F | High | 0 | 0.04168  | 3.31 | 116  |
| 73082   | 37835  | 123708  | 30908  | 18 | NotUn Heavy | Peak F | Peak F | Peak F | Peak F | High   | Peak F | High | 0 | 0.07328  | 2.63 | 116  |
| 21454   | 27957  | 70600   | 15642  | 12 | NotUn Light | High   | High   | Peak F | Peak F | Peak F | Peak F | High | 0 | 0.1528   | 2.13 | 72.2 |

|         |        |         |        |    |       |       |      |      |      |      |      |      |      |      |      |      |      |          |          |          |      |      |
|---------|--------|---------|--------|----|-------|-------|------|------|------|------|------|------|------|------|------|------|------|----------|----------|----------|------|------|
|         |        | 7357    |        | 45 | Light | Peak  | F    | High | Not  | Fc   | Not  | Fc   | Peak | F    | Not  | Fc   | High | 0        | 0.1793   | 2.86     | 177  |      |
|         |        | 9620    |        | 46 | Light | Peak  | F    | High | Not  | Fc   | Not  | Fc   | Peak | F    | Not  | Fc   | High | 0        | 0.1047   | 2.69     | 131  |      |
| 11503   |        |         |        | 47 | Light | High  | High | Peak | F    | Not  | Fc   | Not  | Fc   | Not  | Fc   | High | 0    | 0.003015 | 4.33     | 143      |      |      |
|         |        |         |        | 74 | Redun | Light | High | High | Not  | Fc   | Peak | F    | Not  | Fc   | Not  | Fc   | High | 0        | 0.001804 | 4.65     | 101  |      |
|         | 31068  |         |        | 74 | Heavy | Peak  | F    | Peak | F    | Not  | Fc   | High | High | Not  | Fc   | High | 0    | 0.000273 | 4.62     | 101      |      |      |
| 16905   |        | 3044    |        | 75 | Light | Peak  | F    | High | Peak | F    | Not  | Fc   | Peak | F    | Not  | Fc   | High | 0        | 0.05256  | 3.05     | 144  |      |
| 10898   | 33993  | 57485   | 12433  | 76 | Light | Peak  | F    | High | Peak | F    | Peak | F    | Peak | F    | Peak | F    | High | 0        | 0.1688   | 2.23     | 65.7 |      |
| 3225    |        | 2288    |        | 77 | Light | Peak  | F    | High | Peak | F    | Not  | Fc   | Peak | F    | Not  | Fc   | High | 0        | 0.007027 | 4.31     | 148  |      |
| 30845   | 21518  | 60623   |        | 78 | Light | High  | High | Peak | F    | Peak | F    | Peak | F    | Not  | Fc   | High | 0    | 0.01981  | 2.98     | 134      |      |      |
| 13684   | 4137   | 7227    |        | 79 | Light | Peak  | F    | High | Peak | F    | Peak | F    | Peak | F    | Not  | Fc   | High | 0        | 0.07466  | 2.68     | 114  |      |
|         | 72094  | 96507   |        | 80 | Light | Peak  | F    | High | Not  | Fc   | Peak | F    | Peak | F    | Not  | Fc   | High | 0        | 0.1264   | 2.61     | 12.9 |      |
| 61187   |        |         |        | 81 | Light | High  | High | Peak | F    | Not  | Fc   | Not  | Fc   | Not  | Fc   | High | 0    | 0.007829 | 3.88     | 117      |      |      |
| 1035574 |        |         |        | 82 | Light | High  | High | Peak | F    | Not  | Fc   | Not  | Fc   | Not  | Fc   | High | 0    | 0.000148 | 6.3      | 102      |      |      |
|         | 146172 | 117227  | 40833  | 83 | Light | High  | High | Not  | Fc   | Peak | F    | Peak | F    | Peak | F    | High | 0    | 0.001226 | 4.66     | 209      |      |      |
| 10427   | 45366  | 128253  | 26463  | 73 | Heavy | Peak  | F    | Peak | F    | Peak | F    | High | High | Peak | F    | High | 0    | 0.01267  | 3.93     | 94.6     |      |      |
| 3529360 |        |         |        | 84 | Light | High  | High | Peak | F    | Not  | Fc   | Not  | Fc   | Not  | Fc   | High | 0    | 3.74E-06 | 7.41     | 150      |      |      |
| 36988   | 13108  | 30984   | 9877   | 86 | Heavy | Peak  | F    | Peak | F    | Peak | F    | Peak | F    | High | Peak | F    | High | 0        | 0.003285 | 3.45     | 150  |      |
| 53670   |        |         |        | 87 | Light | Peak  | F    | High | Peak | F    | Not  | Fc   | Not  | Fc   | Not  | Fc   | High | 0        | 0.001114 | 5.17     | 119  |      |
| 190017  |        |         |        | 88 | Light | Peak  | F    | High | Peak | F    | Not  | Fc   | Not  | Fc   | Not  | Fc   | High | 0        | 0.1003   | 2.84     | 62   |      |
|         | 5970   | 33332   | 5783   | 89 | Light | Peak  | F    | High | Not  | Fc   | Peak | F    | Peak | F    | Peak | F    | High | 0        | 0.05081  | 3.22     | 115  |      |
| 19170   | 26261  | 32767   | 18614  | 90 | Heavy | Peak  | F    | Peak | F    | Peak | F    | Peak | F    | High | Peak | F    | High | 0        | 0.0442   | 2.68     | 116  |      |
|         |        |         |        | 91 | Redun | Light | High | High | Peak | F    | Peak | F    | Peak | F    | Peak | F    | High | 0        | 0.0699   | 2.33     | 140  |      |
| 4339    | 85209  | 134515  | 18563  | 91 | Heavy | Peak  | F    | Peak | F    | Peak | F    | High | High | Peak | F    | High | 0    | 0.03526  | 2.8      | 140      |      |      |
|         |        |         |        | 92 | Redun | Light | Not  | Fc   | High | Not  | Fc   | Not  | Fc   | Peak | F    | Not  | Fc   | High     | 0        | 0.004052 | 3.98 | 197  |
|         |        | 99799   |        | 92 | Heavy | Not   | Fc   | Peak | F    | Not  | Fc   | Not  | Fc   | High | Not  | Fc   | High | 0        | 0.002244 | 3.95     | 197  |      |
|         |        |         |        | 93 | Light | Not   | Fc   | High | Not  | Fc   | Not  | Fc   | Not  | Fc   | Not  | Fc   | High | 0        | 0.06377  | 2.58     | 147  |      |
| 1292379 | 612357 | 1656134 | 404076 | 94 | NotUn | Light | Peak | F    | High | Peak | F    | Peak | F    | Peak | F    | Peak | F    | High     | 0        | 0.1724   | 2.29 | 136  |
|         |        |         |        | 85 | Light | High  | High | Not  | Fc   | Not  | Fc   | Not  | Fc   | Not  | Fc   | High | 0    | 0.0293   | 3.91     | 164      |      |      |
|         |        | 6783    |        | 72 | NotUn | Light | Peak | F    | High | Not  | Fc   | Not  | Fc   | Peak | F    | Not  | Fc   | High     | 0        | 0.06119  | 2.71 | 134  |
| 51985   |        | 3086    | 1660   | 71 | Light | Peak  | F    | High | Peak | F    | Not  | Fc   | Peak | F    | Peak | F    | High | 0        | 0.01039  | 4.01     | 144  |      |
| 13337   |        |         |        | 70 | Light | Peak  | F    | High | Peak | F    | Not  | Fc   | Not  | Fc   | Not  | Fc   | High | 0        | 0.007053 | 3.89     | 121  |      |
| 235149  |        |         |        | 48 | Light | High  | High | Peak | F    | Not  | Fc   | Not  | Fc   | Not  | Fc   | High | 0    | 0.000791 | 5.08     | 104      |      |      |
| 1068967 |        |         |        | 49 | Light | High  | High | Peak | F    | Not  | Fc   | Not  | Fc   | Not  | Fc   | High | 0    | 0.000529 | 5.31     | 186      |      |      |
| 57893   |        |         |        | 50 | Light | High  | High | Peak | F    | Not  | Fc   | Not  | Fc   | Not  | Fc   | High | 0    | 0.000201 | 5.98     | 48       |      |      |
| 1475    |        |         |        | 51 | Light | High  | High | Peak | F    | Not  | Fc   | Not  | Fc   | Not  | Fc   | High | 0    | 0.003757 | 4.38     | 44.2     |      |      |
|         |        |         |        | 52 | NoQu  | Heavy | Not  | Fc   | Not  | Fc   | Not  | Fc   | Not  | Fc   | High | Not  | Fc   | High     | 0        | 0.07092  | 2.77 |      |
| 14203   |        |         |        | 53 | Light | Peak  | F    | High | Peak | F    | Not  | Fc   | Not  | Fc   | Not  | Fc   | High | 0        | 0.007259 | 4.18     | 66.1 |      |
| 92047   | 173055 | 273536  | 164980 | 54 | Light | High  | High | Peak | F    | Peak | F    | Peak | F    | Peak | F    | High | 0    | 0.00011  | 5.79     | 138      |      |      |
| 61978   |        |         |        | 55 | Light | High  | High | Peak | F    | Not  | Fc   | Not  | Fc   | Not  | Fc   | High | 0    | 0.043    | 3.4      | 122      |      |      |
|         |        |         |        | 56 | Redun | Light | Peak | F    | High | Peak | F    | Peak | F    | Peak | F    | Peak | F    | High     | 0        | 0.05763  | 3.13 | 54.9 |
| 13314   | 20523  | 49264   | 12352  | 56 | NotUn | Heavy | Peak | F    | Peak | F    | Peak | F    | Peak | F    | High | Peak | F    | High     | 0        | 0.04166  | 3.46 | 54.9 |
| 27911   |        |         |        | 57 | Light | High  | High | Peak | F    | Not  | Fc   | Not  | Fc   | Not  | Fc   | High | 0    | 0.0368   | 3.04     | 147      |      |      |

|        |        |        |        |                                                             |   |          |      |      |
|--------|--------|--------|--------|-------------------------------------------------------------|---|----------|------|------|
| 474476 | 211587 | 341776 | 116909 | 58 Redun Light High High Peak F Peak F Peak F Peak F High   | 0 | 0.001389 | 4.46 | 23.1 |
|        |        |        |        | 58 NotUn Heavy Peak F Peak F Peak F High High Peak F High   | 0 | 0.002851 | 4.49 | 23.1 |
|        |        |        |        | 59 Redun Light High High Peak F Peak F Peak F Peak F High   | 0 | 0.000246 | 4.12 | 53.2 |
| 264281 | 168786 | 414969 | 128216 | 59 NotUn Heavy Peak F Peak F Peak F High High Peak F High   | 0 | 0.000678 | 5.02 | 53.2 |
| 21606  | 3716   | 6437   | 2864   | 60 Light Peak F High Peak F Peak F Peak F Peak F High       | 0 | 0.03406  | 3.2  | 46.5 |
| 57585  |        |        |        | 61 Light Peak F High Peak F Not Fc Not Fc Not Fc High       | 0 | 4.95E-05 | 5.78 | 63.4 |
| 35564  |        |        |        | 62 Light High High Peak F Not Fc Not Fc Not Fc High         | 0 | 0.01903  | 4    | 141  |
| 9954   |        |        |        | 63 Light Peak F High Peak F Not Fc Not Fc Not Fc High       | 0 | 0.0126   | 4.06 | 11.5 |
| 36745  |        |        |        | 64 Light Peak F High Peak F Not Fc Not Fc Not Fc High       | 0 | 0.04088  | 2.56 | 11.8 |
| 15100  |        |        |        | 65 Light Peak F High Peak F Not Fc Not Fc Not Fc High       | 0 | 0.01237  | 3.5  | 36.5 |
|        |        |        |        | 66 NoQu: Light Not Fc High Not Fc Not Fc Not Fc Not Fc High | 0 | 0.07398  | 3.61 |      |
| 12273  |        | 11584  |        | 67 NotUn Light Peak F High Peak F Not Fc Peak F Not Fc High | 0 | 0.1457   | 2.21 | 91   |
|        | 18197  | 126624 | 7893   | 68 Light High High Not Fc Peak F Peak F Peak F High         | 0 | 0.09089  | 2.59 | 141  |
| 19619  | 6625   | 38041  | 2228   | 69 Light Peak F High Peak F Peak F Peak F Peak F High       | 0 | 0.002624 | 3.49 | 145  |
| 91822  | 6947   | 15990  |        | 198 Light Peak F High Peak F Peak F Peak F Not Fc High      | 0 | 0.08131  | 2.87 | 85.2 |
| 974569 |        |        |        | 199 Light High High Peak F Not Fc Not Fc Not Fc High        | 0 | 0.000115 | 6.33 | 116  |

**Supplemental Table 4.4.** Raw Proteome discoverer output from the three replicates of Condition D

| Checked | Confid | Sequence  | Modifications | Contamir       | Quality         | PEP      | Quality  | q      | Num | Num | Num     | Master                 | Prc                  | Master | Protei | Protein | A      | Num   | Theo | MH | Abundan | Abundan | Abundan | Abundan | Abundan | Abundan |
|---------|--------|-----------|---------------|----------------|-----------------|----------|----------|--------|-----|-----|---------|------------------------|----------------------|--------|--------|---------|--------|-------|------|----|---------|---------|---------|---------|---------|---------|
| FALSE   | High   | AAAAAAAAA | AAAAATPTTAA   | FALSE          | 0.006123        | 0.0064   | 1        | 1      | 1   | 1   | P37108  | Signal recogni         | P37108               | 0      | 2368.2 |         |        |       |      |    |         |         |         |         |         |         |
| FALSE   | High   | RTPPAGV   | FYQGW         | SATPIANGSI     | TRUE            | 9.45E-08 | 0.0064   | 1      | 1   | 3   | cRAP117 | 000000 rLys-(          | cRAP117              | 1      | 3239.6 | 1E+06   |        |       |      |    | 54.52   |         |         | 2E+06   | 1E+06   |         |
| FALSE   | High   | RTPPAGV   | FYQGW         | SATPIANGSI     | TRUE            | 0.000184 | 0.0064   | 1      | 1   | 3   | cRAP117 | 000000 rLys-(          | cRAP117              | 2      | 3610.8 | 2E+07   |        |       |      |    | 27.8    |         |         | 2E+07   | 3E+07   |         |
| FALSE   | High   | RVTIMPK   |               |                | FALSE           | 0.049925 | 0.0064   | 1      | 5   | 1   | P84243  | Histone H3.3 (P84243;  |                      | 1      | 844.51 | 810816  | 169458 |       |      |    | 55      | 47.13   | 387548  | 1E+06   |         |         |
| FALSE   | High   | RVTIMPK   | DIQLAR        |                | FALSE           | 1.89E-06 | 0.0064   | 1      | 5   | 1   | P84243  | Histone H3.3 (P84243;  |                      | 2      | 1540.9 | 802681  | 187820 |       |      |    | 41.96   | 36.09   | 382290  | 964873  |         |         |
| FALSE   | High   | RVTIMPK   | DIC           | 1xOxidation [M | FALSE           | 4.71E-05 | 0.0064   | 1      | 5   | 2   | P84243  | Histone H3.3 (P84243;  |                      | 2      | 1556.9 | 443413  | 73971  |       |      |    | 85.66   | 85.61   | 125552  | 1E+06   |         |         |
| FALSE   | High   | RYQK      | STELLIR       |                | FALSE           | 0.004882 | 0.0064   | 1      | 5   | 1   | P84243  | Histone H3.3 (P84243;  |                      | 2      | 1406.8 | 34500   | 7351.6 |       |      |    | 50.11   | 75.92   |         | 49965   |         |         |
| FALSE   | High   | RKPD      | TIEVQC        | 1xOxidation [M | FALSE           | 1.74E-05 | 0.0064   | 1      | 3   | 1   | P35241  | Radixin OS=Hc (P35241; |                      | 1      | 1488.8 | 45160   |        |       |      |    | 59.33   |         | 106120  | 37998   |         |         |
| FALSE   | High   | SCAAAG    | TECL          | 2xCarbamidom   | TRUE            | 7.32E-14 | 0.0064   | 1      | 1   | 3   | cRAP112 | Trypsin OS=Su cRAP112  |                      | 0      | 1882.8 | 402786  |        |       |      |    | 97.7    |         | 14361   | 820060  |         |         |
| FALSE   | High   | SGDAAI    | VDM           | 1xCarbamidom   | FALSE           | 8.97E-05 | 0.0064   | 1      | 2   | 1   | P68104  | Elongation fac P68104; |                      | 0      | 2995.4 |         |        |       |      |    |         |         |         |         |         |         |
| FALSE   | High   | SGDAAI    | VDM           | 1xCarbamidom   | FALSE           | 0.004989 | 0.0064   | 1      | 2   | 1   | P68104  | Elongation fac P68104; |                      | 0      | 3007.4 | 54704   | 21022  |       |      |    | 82.29   | 79.43   | 8423.6  | 95233   |         |         |
| FALSE   | High   | SGYR      | SGGFSSGS      | GAIINYQR       | TRUE            | 6.10E-05 | 0.0064   | 1      | 1   | 1   | P04264  | Keratin, type I P04264 |                      | 1      | 2121   | 42531   |        |       |      |    |         |         |         |         |         |         |
| FALSE   | High   | SIQAD     | GLVW          | 1xLabel:13C(6) | FALSE           | 0.000146 | 0.0064   | 1      | 1   | 1   | P24534  | Elongation fac P24534  |                      | 0      | 1353.7 |         |        |       |      |    |         |         |         |         |         |         |
| FALSE   | High   | SISIS     | VAR           |                | TRUE            | 0.000928 | 0.0064   | 1      | 1   | 1   | P04264  | Keratin, type I P04264 |                      | 0      | 832.49 | 1E+06   | 7326.4 |       |      |    | 25.97   |         | 776951  | 1E+06   |         |         |
| FALSE   | High   | SLVGL     | GGTK          |                | TRUE            | 0.138859 | 0.0064   | 1      | 1   | 1   | P35908  | Keratin, type I P35908 |                      | 0      | 831.49 | 600521  |        |       |      |    |         |         |         |         |         |         |
| FALSE   | High   | SCQAQ     | PTTM          | 1xCarbamidom   | TRUE            | 1.06E-06 | 0.0064   | 1      | 1   | 1   | cRAP016 | Kappa-casein cRAP016   |                      | 0      | 1250.6 | 66648   |        |       |      |    | 22.1    |         | 79977   | 50911   |         |         |
| FALSE   | High   | RKPD      | TIEV          | QQMK           | FALSE           | 2.72E-05 | 0.0064   | 1      | 3   | 1   | P35241  | Radixin OS=Hc (P35241; |                      | 1      | 1472.8 | 645745  |        |       |      |    | 28.2    |         | 826006  | 462377  |         |         |
| FALSE   | High   | RKATG     | PPVSE         | 3xLabel:13C(6) | FALSE           | 0.017192 | 0.0064   | 1      | 1   | 1   | P16401  | Histone H1.5 (P16401   |                      | 2      | 1514.9 | 37529   | 59763  |       |      |    | 66.26   | 84.13   | 15643   | 69523   |         |         |
| FALSE   | High   | RGDL      | PFV           | VPR            | FALSE           | 0.000381 | 0.0064   | 1      | 1   | 2   | P35579  | Myosin-9 OS= P35579    |                      | 1      | 1155.7 | 239921  |        |       |      |    | 38.13   |         | 237130  | 239921  |         |         |
| FALSE   | High   | LSSP      | ATLNSR        |                | TRUE            | 0.010985 | 0.0064   | 1      | 1   | 1   | cRAP112 | Trypsin OS=Su cRAP112  |                      | 0      | 1045.6 | 4E+06   |        |       |      |    | 33.86   |         | 2E+06   | 4E+06   |         |         |
| FALSE   | High   | ITIAD     | CGQLE         | 1xCarbamidom   | TRUE            | 0.051914 | 0.0064   | 1      | 1   | 1   | P62937  | Peptidyl-proly P62937  |                      | 0      | 1119.5 |         |        |       |      |    |         |         |         |         |         |         |
| FALSE   | High   | IVGGY     | TCAA          | 3xCarbamidom   | TRUE            | 4.34E-05 | 0.0064   | 1      | 1   | 1   | cRAP112 | Trypsin OS=Su cRAP112  |                      | 0      | 4660.2 | 55311   |        |       |      |    | 115.86  |         |         | 175490  |         |         |
| FALSE   | High   | LYAE      | ERYILP        | 1xCarbamidom   | TRUE            | 0.000264 | 0.0064   | 1      | 1   | 1   | cRAP086 | Ovalbumin OS cRAP086   |                      | 2      | 2845.5 | 112792  |        |       |      |    | 80.34   |         | 27571   | 220342  |         |         |
| FALSE   | High   | MDKNE     | L             | VQK            | 1xAcetyl [N-Ter | FALSE    | 0.000261 | 0.0064 | 1   | 1   | P63104  | 14-3-3 proteir P63104  |                      | 2      | 1345.7 | 111364  | 42799  |       |      |    | 60.99   | 67.84   | 27002   | 111364  |         |         |
| FALSE   | High   | MFLR      | GDSV          | 3xLabel:13C(6) | FALSE           | 0.021112 | 0.0064   | 1      | 1   | 1   | P62316  | Small nuclear P62316   |                      | 2      | 2216.3 | 64614   | 44992  |       |      |    |         | 77.06   |         |         |         |         |
| FALSE   | High   | MGCSS     | SALN          | 1xCarbamidom   | FALSE           | 0.114434 | 0.0064   | 1      | 1   | 1   | Q6P6B1  | Glutamate-ric Q6P6B1   |                      | 1      | 1649.7 |         |        |       |      |    |         |         |         |         |         |         |
| FALSE   | High   | MVFT      | S             | SADG           | 1xCarbamidom    | TRUE     | 3.89E-17 | 0.0064 | 1   | 1   | 11      | cRAP117                | 000000 rLys-(cRAP117 |        | 0      | 2691.2  | 2E+07  | 29473 |      |    |         | 45.09   | 73.54   | 1E+07   | 2E+07   |         |
| FALSE   | High   | MVFT      | S             | SADG           | 1xCarbamidom    | TRUE     | 3.84E-14 | 0.0064 | 1   | 1   | 11      | cRAP117                | 000000 rLys-(cRAP117 |        | 0      | 2707.2  | 369829 | 63224 |      |    |         | 86.15   | 92.92   | 68021   | 369829  |         |
| FALSE   | High   | NDYF      | SDFSG         | VYSQISR        | TRUE            | 1.64E-10 | 0.0064   | 1      | 1   | 1   | cRAP117 | 000000 rLys-(cRAP117   |                      | 0      | 1884.8 | 414028  |        |       |      |    | 25.27   |         | 340877  | 558256  |         |         |
| FALSE   | High   | NLCN      | IPCSAL        | 3xCarbamidom   | TRUE            | 3.52E-09 | 0.0064   | 1      | 1   | 1   | cRAP078 | Lysozyme C O cRAP078   |                      | 0      | 2508.2 | 343259  |        |       |      |    | 60.11   |         | 97953   | 441091  |         |         |
| FALSE   | High   | NLQN      | VDM           | KIGV           | FALSE           | 0.008616 | 0.0064   | 1      | 1   | 1   | P16070  | CD44 antigen P16070    |                      | 1      | 1230.7 | 50324   |        |       |      |    | 53.7    |         | 97788   | 50324   |         |         |
| FALSE   | High   | NTDG      | STDY          | GILQINSR       | TRUE            | 4.05E-06 | 0.0064   | 1      | 1   | 1   | cRAP078 | Lysozyme C O cRAP078   |                      | 0      | 1753.8 | 41488   |        |       |      |    | 71.09   |         | 21067   | 92340   |         |         |
| FALSE   | High   | QVEML     | NK            |                | FALSE           | 0.062429 | 0.0064   | 1      | 1   | 1   | Q5U623  | Activating tra Q5U623  |                      | 0      | 861.45 | 51638   |        |       |      |    | 77.77   |         | 3967.8  | 51638   |         |         |
| FALSE   | High   | RDTLL     | LLELK         |                | TRUE            | 7.29E-06 | 0.0064   | 1      | 1   | 1   | cRAP117 | 000000 rLys-(cRAP117   |                      | 1      | 1100.7 | 4E+06   |        |       |      |    | 0.92    |         | 4E+06   | 4E+06   |         |         |
| FALSE   | High   | SLVN      | LGGSK         |                | TRUE            | 0.037509 | 0.0064   | 1      | 1   | 1   | P04264  | Keratin, type I P04264 |                      | 0      | 874.5  | 2E+06   |        |       |      |    | 34.08   |         | 2E+06   | 2E+06   |         |         |
| FALSE   | High   | SLYAS     | SPGG          | VYATR          | FALSE           | 3.06E-08 | 0.0064   | 1      | 1   | 2   | P08670  | Vimentin OS= P08670    |                      | 0      | 1428.7 | 164463  |        |       |      |    | 61.88   |         |         | 102872  |         |         |
| FALSE   | High   | SPAQ      | LQWQ          | VLNS           | TPAK            | TRUE     | 2.37E-13 | 0.0064 | 1   | 1   | 2       | cRAP016                | Kappa-casein cRAP016 |        | 0      | 1980.1  | 631638 |       |      |    | 42.09   |         | 347046  | 631638  |         |         |
| FALSE   | High   | SPAQ      | LQWQ          | 1xCarbamidom   | TRUE            | 0.063035 | 0.0064   | 1      | 1   | 1   | cRAP016 | Kappa-casein cRAP016   |                      | 1      | 3211.6 | 74516   |        |       |      |    | 73.18   |         | 16697   | 74516   |         |         |
| FALSE   | High   | TVSL      | GAGAKI        | 3xLabel:13C(6) | FALSE           | 2.33E-08 | 0.0064   | 1      | 1   | 1   | P06748  | Nucleophosm P06748     |                      | 2      | 3674   |         |        |       |      |    |         |         |         |         |         |         |
| FALSE   | High   | TVTAM     | DVVY          | 1xOxidation [M | FALSE           | 0.007665 | 0.0064   | 1      | 1   | 1   | P62805  | Histone H4 O P62805    |                      | 0      | 1326.7 | 34389   | 6435.9 |       |      |    | 43.2    | 37.81   | 20331   | 50653   |         |         |

|       |      |                            |       |          |        |   |    |   |           |                 |          |   |        |        |        |        |        |        |        |
|-------|------|----------------------------|-------|----------|--------|---|----|---|-----------|-----------------|----------|---|--------|--------|--------|--------|--------|--------|--------|
| FALSE | High | VAPEEHPVLLTEAPLNPK         | FALSE | 0.000214 | 0.0064 | 1 | 2  | 2 | P60709    | Actin, cytopla  | P60709;  | 0 | 1954.1 | 86415  | 6111.3 | 15.85  | 22.33  | 100284 | 72857  |
| FALSE | High | VFLENVIR                   | FALSE | 0.000352 | 0.0064 | 1 | 1  | 1 | P62805    | Histone H4 O    | P62805   | 0 | 989.58 | 12989  | 11860  | 107.58 |        | 9557.5 | 66504  |
| FALSE | High | VLKQVHPDTGISSK             | FALSE | 0.001149 | 0.0064 | 2 | 15 | 2 | O60814; Q | Histone H2B t   | Q16778;  | 1 | 1508.8 | 153267 | 32517  | 54.01  | 53.67  | 123429 | 323803 |
| FALSE | High | VSLAGACGV 1xCarbamidom     | FALSE | 2.96E-10 | 0.0064 | 1 | 1  | 1 | P13647    | Keratin, type I | P13647   | 0 | 1410.7 | 77931  |        | 50.04  |        | 86467  | 27306  |
| FALSE | High | VTIAQGGVLPNIQAVLLPK        | FALSE | 2.63E-08 | 0.0064 | 1 | 10 | 1 | Q16777    | Histone H2A t   | Q16777;  | 0 | 1931.2 |        |        |        |        |        |        |
| FALSE | High | VTIAQGGVLF 1xLabel:13C(6)  | FALSE | 0.033614 | 0.0064 | 1 | 10 | 1 | Q16777    | Histone H2A t   | Q16777;  | 0 | 1937.2 | 48649  | 45094  | 134.88 | 28.45  | 7483.6 |        |
| FALSE | High | VTIMPK 1xLabel:13C(6)      | FALSE | 0.153498 | 0.0064 | 1 | 5  | 1 | P84243    | Histone H3.3 (P | P84243;  | 0 | 694.43 | 368255 | 63757  | 66.06  | 61.63  | 66715  | 399275 |
| FALSE | High | VTIMPKDIQLAR               | FALSE | 0.000645 | 0.0064 | 1 | 5  | 2 | P84243    | Histone H3.3 (P | P84243;  | 1 | 1384.8 | 327986 | 68485  | 74.81  | 65.45  | 95474  | 610256 |
| FALSE | High | VYQSLCPTSV 1xCarbamidom    | FALSE | 0.038261 | 0.0064 | 1 | 1  | 1 | P14854    | Cytochrome c    | P14854   | 2 | 3170.5 |        |        |        |        |        |        |
| FALSE | High | WWCNDGR 1xCarbamidom       | TRUE  | 0.008708 | 0.0064 | 1 | 1  | 1 | cRAP078   | Lysozyme C O    | cRAP078  | 0 | 993.4  | 93515  | 21175  | 67.78  | 63.33  | 25024  | 142377 |
| FALSE | High | WWCNDGRT 4xCarbamidom      | TRUE  | 5.00E-05 | 0.0064 | 1 | 1  | 1 | cRAP078   | Lysozyme C O    | cRAP078  | 2 | 3980.8 | 101383 | 18467  | 17.13  |        |        | 89766  |
| FALSE | High | YADLTEDQLF 1xCarbamidom    | FALSE | 0.006189 | 0.0064 | 1 | 1  | 1 | P18669    | Phosphoglyce    | P18669   | 1 | 2437.2 |        | 65622  |        | 49.18  |        |        |
| FALSE | High | YEKDIAAYRAK                | FALSE | 0.007665 | 0.0064 | 1 | 2  | 1 | P26583    | High mobility   | P26583;  | 2 | 1327.7 | 280139 |        | 45.49  |        | 495810 | 208990 |
| FALSE | High | TVSLGAGAKI 2xLabel:13C(6)  | FALSE | 0.010985 | 0.0064 | 1 | 1  | 1 | P06748    | Nucleophosm     | P06748   | 1 | 2941.5 | 28538  | 45107  | 69.82  | 15.24  | 5866   | 28538  |
| FALSE | High | ISGLIYEETR                 | FALSE | 1.62E-06 | 0.0064 | 1 | 1  | 1 | P62805    | Histone H4 O    | P62805   | 0 | 1180.6 | 281704 | 5287.5 | 30.26  | 90.6   | 214824 | 281704 |
| FALSE | High | TVETRDGQVINETSQHDDLE       | FALSE | 1.62E-07 | 0.0064 | 1 | 1  | 1 | P08670    | Vimentin OS=    | P08670   | 1 | 2423.1 | 28108  |        | 66.29  |        | 8040.7 | 28108  |
| FALSE | High | TTAEPQHQSPPGISSEGFWD       | FALSE | 0.153498 | 0.0064 | 1 | 1  | 1 | Q68DA7    | Formin-1 OS=    | Q68DA7   | 2 | 4839.3 |        |        |        |        |        |        |
| FALSE | High | SPAQILQWQ 1xCarbamidom     | TRUE  | 1.19E-07 | 0.0064 | 1 | 1  | 1 | cRAP016   | Kappa-casein    | cRAP016  | 1 | 3227.6 | 42978  |        | 94.3   |        |        | 19216  |
| FALSE | High | SQRAGLQFPVGR               | FALSE | 0.077095 | 0.0064 | 1 | 2  | 1 | Q71UI9    | Histone H2A.\   | Q71UI9;  | 1 | 1315.7 | 160048 | 24474  | 106.89 | 122.24 | 59686  | 429170 |
| FALSE | High | SRGSGGLGG 1xCarbamidom     | FALSE | 2.98E-05 | 0.0064 | 1 | 3  | 1 | P04259    | Keratin, type I | P04259;  | 1 | 1667.8 | 74282  |        | 18.22  |        | 77658  | 74282  |
| FALSE | High | SSLLEKGLDGAK               | FALSE | 0.129035 | 0.0064 | 1 | 1  | 1 | P81605    | Dermcidin OS    | P81605   | 1 | 1217.7 | 503275 |        | 66.19  |        | 491479 | 1E+06  |
| FALSE | High | SSLLEKGLDGAKK              | FALSE | 0.023143 | 0.0064 | 1 | 1  | 1 | P81605    | Dermcidin OS    | P81605   | 2 | 1345.8 | 98817  |        | 53.69  |        | 43867  | 147776 |
| FALSE | High | STELLIR                    | FALSE | 0.00105  | 0.0064 | 1 | 5  | 3 | P84243    | Histone H3.3 (P | P84243;  | 0 | 831.49 | 1E+06  | 79846  | 60.19  | 110.97 | 839521 | 3E+06  |
| FALSE | High | STITSREIQTAVR              | FALSE | 0.000443 | 0.0064 | 1 | 13 | 2 | O60814    | Histone H2B t   | Q16778;  | 1 | 1461.8 | 1E+06  | 387273 | 88.6   | 87.01  | 240609 | 3E+06  |
| FALSE | High | STITSREIQTA 2xLabel:13C(6) | FALSE | 5.00E-06 | 0.0064 | 1 | 13 | 1 | O60814    | Histone H2B t   | Q16778;  | 1 | 1473.8 |        |        |        |        |        |        |
| FALSE | High | SYELPDGQVITIGNER           | FALSE | 2.72E-06 | 0.0064 | 1 | 10 | 1 | P60709    | Actin, cytopla  | A5A3E0;  | 0 | 1790.9 |        |        |        |        |        |        |
| FALSE | High | THNLEPYFESFINNLR           | TRUE  | 0.001149 | 0.0064 | 1 | 1  | 1 | P04264    | Keratin, type I | P04264   | 0 | 1994   | 16235  |        | 70.88  |        | 16235  | 30093  |
| FALSE | High | TIGISVDPR                  | FALSE | 0.001074 | 0.0064 | 1 | 1  | 1 | P26373    | 60S ribosoma    | P26373   | 0 | 957.54 | 74904  | 8054.6 | 43.88  |        | 54346  |        |
| FALSE | High | TIPSWATLSASQLAR            | FALSE | 6.34E-09 | 0.0064 | 1 | 1  | 1 | Q5SSJ5    | Heterochrom     | Q5SSJ5   | 0 | 1601.9 | 47065  |        | 1.56   |        |        | 47588  |
| FALSE | High | TNGKEPELLEPIPYEFMA         | FALSE | 0.000959 | 0.0064 | 1 | 1  | 1 | P46778    | 60S ribosoma    | P46778   | 1 | 2078   | 31901  | 15786  |        |        |        |        |
| FALSE | High | TPPAGVFYQGW SATPIANGSL     | TRUE  | 9.50E-05 | 0.0064 | 1 | 1  | 2 | cRAP117   | 000000 rLys-    | (cRAP117 | 0 | 3083.5 | 441727 |        | 13.5   |        | 529182 | 441727 |
| FALSE | High | TPPAGVFYQGW SATPIANGSL     | TRUE  | 3.52E-06 | 0.0064 | 1 | 1  | 2 | cRAP117   | 000000 rLys-    | (cRAP117 | 1 | 3454.7 | 914063 |        | 22.21  |        | 1E+06  | 914063 |
| FALSE | High | TTEGCLNPR 1xCarbamidom     | FALSE | 0.00028  | 0.0064 | 1 | 1  | 1 | P05107    | Integrin beta-  | P05107   | 0 | 1047.5 | 28071  |        | 17.34  |        | 27828  | 37275  |
| FALSE | High | YLGYLEQLLR                 | TRUE  | 2.59E-05 | 0.0064 | 1 | 1  | 1 | cRAP013   | Alpha-S1-case   | cRAP013  | 0 | 1267.7 | 192268 |        | 50.54  |        | 105950 | 310113 |
| FALSE | High | LSAKPAPPKPEPRPK            | FALSE | 0.018477 | 0.0064 | 1 | 1  | 1 | O00479    | High mobility   | O00479   | 0 | 1613   | 50796  | 2517.2 | 92.09  |        | 26333  | 166184 |
| FALSE | High | IQVRLGEHNIDVLEGNEQFINA     | TRUE  | 0.00027  | 0.0064 | 1 | 1  | 1 | cRAP112   | Trypsin OS=S    | cRAP112  | 1 | 2707.4 | 188754 |        | 41.58  |        | 83010  | 188754 |
| FALSE | High | AVFVDLEPTV 1xLabel:13C(6)  | FALSE | 0.000205 | 0.0064 | 1 | 3  | 1 | Q71U36    | Tubulin alpha-  | Q71U36;  | 0 | 1707.9 |        | 136020 |        | 66.66  |        |        |
| FALSE | High | AYDNATAAAV                 | TRUE  | 1.31E-05 | 0.0064 | 1 | 1  | 1 | cRAP117   | 000000 rLys-    | (cRAP117 | 0 | 1094.5 | 1E+07  | 2371.4 | 38.47  |        | 9E+06  | 1E+07  |
| FALSE | High | AYDNATAAV 1xCarbamidom     | TRUE  | 1.50E-15 | 0.0064 | 1 | 1  | 2 | cRAP117   | 000000 rLys-    | (cRAP117 | 1 | 3766.8 | 771961 |        | 69.08  |        | 151660 | 771961 |
| FALSE | High | AYDNATAAV 1xCarbamidom     | TRUE  | 0.000731 | 0.0064 | 1 | 1  | 1 | cRAP117   | 000000 rLys-    | (cRAP117 | 2 | 3922.9 | 95746  |        | 38.68  |        |        | 126763 |
| FALSE | High | CDVDIRKDLY 1xCarbamidom    | FALSE | 0.03262  | 0.0064 | 1 | 2  | 1 | P60709    | Actin, cytopla  | P60709;  | 2 | 3117.5 | 28059  |        | 37.62  |        | 28059  | 13172  |
| FALSE | High | CELAAAMKR 1xCarbamidom     | TRUE  | 0.000928 | 0.0064 | 1 | 1  | 2 | cRAP078   | Lysozyme C O    | cRAP078  | 1 | 1049.5 | 137898 |        | 51.21  |        | 51238  | 169473 |



|       |      |                        |                |       |          |        |   |    |   |           |                |          |   |        |        |        |        |        |        |        |  |
|-------|------|------------------------|----------------|-------|----------|--------|---|----|---|-----------|----------------|----------|---|--------|--------|--------|--------|--------|--------|--------|--|
| FALSE | High | ASGQAFELIL             | 1xLabel:13C(6) | FALSE | 8.36E-05 | 0.0064 | 1 | 1  | 1 | P16949    | Stathmin OS=   | P16949   | 0 | 1394.8 |        | 92848  |        | 12.96  |        |        |  |
| FALSE | High | CNKEYVFAEF             | 1xCarbamidom   | FALSE | 4.24E-05 | 0.0064 | 1 | 1  | 2 | P50238    | Cysteine-rich  | P50238   | 1 | 1315.6 | 384790 | 55910  | 26.88  | 47.62  | 342569 | 384790 |  |
| FALSE | High | DGFGASGSCI             | 2xCarbamidom   | TRUE  | 4.37E-15 | 0.0064 | 1 | 1  | 2 | cRAP117   | 000000 rLys-(  | cRAP117  | 0 | 2231.9 | 228507 |        | 27.69  |        | 194969 | 228507 |  |
| FALSE | High | DGFGASGSCI             | 2xCarbamidom   | TRUE  | 9.47E-13 | 0.0064 | 1 | 1  | 1 | cRAP117   | 000000 rLys-(  | cRAP117  | 1 | 3307.5 | 43314  |        | 47.53  |        | 38959  | 87599  |  |
| FALSE | High | DIGFIKLD               |                | FALSE | 0.015992 | 0.0064 | 1 | 1  | 1 | P62273    | 40S ribosoma   | P62273   | 1 | 920.51 | 55823  | 41512  | 24.65  | 26.52  |        | 66572  |  |
| FALSE | High | DIGFIKLD               | 1xLabel:13C(6) | FALSE | 0.020266 | 0.0064 | 1 | 1  | 1 | P62273    | 40S ribosoma   | P62273   | 1 | 926.53 |        |        |        |        |        |        |  |
| FALSE | High | DNIQGITKPAIR           |                | FALSE | 0.144026 | 0.0064 | 1 | 1  | 1 | P62805    | Histone H4 O   | P62805   | 0 | 1325.8 | 48183  | 11665  | 68.05  |        | 15870  | 82228  |  |
| FALSE | High | DTLLELTK               |                | TRUE  | 0.00061  | 0.0064 | 1 | 1  | 1 | cRAP117   | 000000 rLys-(  | cRAP117  | 0 | 944.57 | 272519 | 14022  | 39.62  |        | 151182 | 272519 |  |
| FALSE | High | CSQAVYAAEI             | 1xCarbamidom   | FALSE | 0.000352 | 0.0064 | 1 | 1  | 1 | P21291    | Cysteine and   | P21291   | 1 | 1651.8 | 188528 |        | 14.5   |        | 194518 | 147415 |  |
| FALSE | High | ASGPPVSELITK           |                | FALSE | 0.0995   | 0.0064 | 1 | 3  | 1 | P16402    | Histone H1.3   | (P16402; | 0 | 1198.7 | 172967 | 47868  | 36.92  | 32.26  | 164135 | 305247 |  |
| FALSE | High | AQAAAPASVPAQAPK        |                | FALSE | 0.000544 | 0.0064 | 1 | 1  | 1 | P47914    | 60S ribosoma   | P47914   | 0 | 1377.7 | 555409 | 185552 | 46.95  | 57.59  | 200182 | 556051 |  |
| FALSE | High | AMKPWIQPK              |                | TRUE  | 0.031026 | 0.0064 | 1 | 1  | 2 | cRAP014   | Alpha-S2-case  | cRAP014  | 0 | 1098.6 | 37123  |        | 64.81  |        | 13027  | 37123  |  |
| FALSE | High | AAFSGSGGRGSSSSGGYSSGS  |                | TRUE  | 3.26E-15 | 0.0064 | 1 | 1  | 2 | P35908    | Keratin, type  | P35908   | 1 | 2501.1 | 67393  |        | 46.97  |        | 67393  | 64592  |  |
| FALSE | High | ACGVS RPVIA            | 2xCarbamidom   | FALSE | 0.007998 | 0.0064 | 1 | 1  | 1 | P55769    | NHP2-like pro  | P55769   | 2 | 3799   | 71598  |        | 33.73  |        |        | 91310  |  |
| FALSE | High | AEAESLYQSK             |                | TRUE  | 0.00016  | 0.0064 | 1 | 1  | 1 | P04264    | Keratin, type  | P04264   | 0 | 1125.5 | 31466  |        | 72.69  |        | 9936.6 | 31466  |  |
| FALSE | High | AEFVEVTKLVTDLTK        |                | TRUE  | 0.001257 | 0.0064 | 1 | 1  | 1 | cRAP087   | Serum albumi   | cRAP087  | 1 | 1692.9 | 28214  |        | 5.87   |        | 29412  | 27066  |  |
| FALSE | High | AGFAGDDAPR             |                | FALSE | 5.90E-07 | 0.0064 | 1 | 10 | 1 | P60709    | Actin, cytopla | A5A3E0;  | 0 | 976.45 | 295235 | 63361  | 71.55  | 64.16  | 295235 | 274361 |  |
| FALSE | High | AGLQFPVGR              |                | FALSE | 1.31E-06 | 0.0064 | 2 | 15 | 1 | Q16777; Q | Histone H2A t  | Q16777;  | 0 | 944.53 | 3E+06  | 529758 | 59.89  | 64.05  | 1E+06  | 4E+06  |  |
| FALSE | High | AGLQFPVGR              | 1xLabel:13C(6) | FALSE | 0.011822 | 0.0064 | 2 | 15 | 1 | Q16777; Q | Histone H2A t  | Q16777;  | 0 | 950.55 |        |        |        |        |        |        |  |
| FALSE | High | AGYRDGFGA              | 2xCarbamidom   | TRUE  | 8.62E-13 | 0.0064 | 1 | 1  | 3 | cRAP117   | 000000 rLys-(  | cRAP117  | 1 | 2679.2 | 9E+06  |        | 34.93  |        | 9E+06  | 9E+06  |  |
| FALSE | High | AGYRDGFGA              | 2xCarbamidom   | TRUE  | 8.56E-18 | 0.0064 | 1 | 1  | 2 | cRAP117   | 000000 rLys-(  | cRAP117  | 2 | 3754.7 | 2E+07  |        | 53.49  |        | 6E+06  | 2E+07  |  |
| FALSE | High | AHVEHMQSL              | 1xOxidation [M | FALSE | 0.058342 | 0.0064 | 1 | 1  | 1 | Q13029    | PR domain zir  | Q13029   | 0 | 2064   | 3E+06  |        | 92.35  |        | 8461.4 | 4E+06  |  |
| FALSE | High | ALAAAGYDVEKNNSR        |                | FALSE | 0.05091  | 0.0064 | 1 | 5  | 1 | P16402    | Histone H1.3   | (P16402; | 1 | 1578.8 | 108281 | 44694  | 109.67 | 109.77 | 23195  | 383101 |  |
| FALSE | High | ALCSEKLDQV             | 2xCarbamidom   | TRUE  | 0.009181 | 0.0064 | 1 | 1  | 1 | cRAP075   | Alpha-lactalb  | cRAP075  | 2 | 1892.9 | 99944  |        | 71.23  |        | 19746  | 142121 |  |
| FALSE | High | ALKAWSVAR              |                | TRUE  | 0.001521 | 0.0064 | 1 | 1  | 1 | cRAP087   | Serum albumi   | cRAP087  | 1 | 1001.6 | 84450  |        | 65.26  |        | 18032  | 103127 |  |
| FALSE | High | AMGIMNSFV              | 1xOxidation [M | FALSE | 0.003929 | 0.0064 | 2 | 14 | 1 | O60814; Q | Histone H2B t  | Q16778;  | 0 | 1759.8 | 130285 | 43204  | 82.37  | 48.43  | 18728  | 222347 |  |
| FALSE | High | AMGIMNSFV              | 1xOxidation [M | FALSE | 0.001027 | 0.0064 | 2 | 14 | 1 | O60814; Q | Histone H2B t  | Q16778;  | 0 | 1765.8 |        |        |        |        |        |        |  |
| FALSE | High | EIQTAVRLLLPGELAK       |                | FALSE | 0.019855 | 0.0064 | 1 | 14 | 1 | O60814    | Histone H2B t  | Q16778;  | 1 | 1751   | 6E+06  | 1E+06  | 75.2   | 74.47  | 733002 | 8E+06  |  |
| FALSE | High | EVQTAVRLLLPGELAK       |                | FALSE | 0.053979 | 0.0064 | 1 | 1  | 1 | Q8N257    | Histone H2B t  | Q8N257   | 1 | 1737   | 149249 | 82898  | 71.62  | 71.95  | 21130  | 175303 |  |
| FALSE | High | GGLYGGPSY              | 1xCarbamidom   | TRUE  | 3.56E-08 | 0.0064 | 1 | 1  | 1 | cRAP117   | 000000 rLys-(  | cRAP117  | 1 | 3593.6 | 4E+06  |        | 59.88  |        | 2E+06  | 7E+06  |  |
| FALSE | High | GGISISGGYGSGGGK        |                | TRUE  | 3.40E-08 | 0.0064 | 1 | 1  | 1 | P35908    | Keratin, type  | P35908   | 0 | 1197.5 | 67203  |        | 110.32 |        | 340998 | 42398  |  |
| FALSE | High | LAPDYDALDVANKIGII      |                | FALSE | 0.001778 | 0.0064 | 1 | 1  | 1 | P62750    | 60S ribosoma   | P62750   | 1 | 1801   | 49803  | 48001  |        | 43.24  |        |        |  |
| FALSE | High | LGEHNIDVLEGNQFINAAK    |                | TRUE  | 2.29E-15 | 0.0064 | 1 | 1  | 2 | cRAP112   | Trypsin OS=Su  | cRAP112  | 0 | 2211.1 | 7E+06  |        | 47.1   |        | 5E+06  | 7E+06  |  |
| FALSE | High | LGEHNIEVLEGNQFINAAK    |                | FALSE | 1.21E-07 | 0.0064 | 1 | 3  | 1 | P07477    | Trypsin-1 OS=  | P07477;  | 0 | 2225.1 | 25336  |        | 54.08  |        | 20919  | 25336  |  |
| FALSE | High | IGLGGRGGSGGSYGR        |                | TRUE  | 0.003601 | 0.0064 | 1 | 1  | 1 | P35527    | Keratin, type  | P35527   | 1 | 1350.7 | 32024  |        | 23.79  |        | 32024  | 25855  |  |
| FALSE | High | IHRHLK                 |                | FALSE | 0.081623 | 0.0064 | 1 | 2  | 1 | Q71UI9    | Histone H2A.\  | Q71UI9;  | 1 | 803.5  | 771043 | 14850  | 30.83  | 9.79   | 1E+06  | 771043 |  |
| FALSE | High | LKAEVEKQSK             |                | FALSE | 0.000847 | 0.0064 | 1 | 1  | 1 | Q9UM00    | Calcium load-  | Q9UM00   | 2 | 1159.7 | 10458  |        | 119.42 |        | 6412.4 | 10458  |  |
| FALSE | High | LKTKENLEK              |                | FALSE | 0.025617 | 0.0064 | 1 | 1  | 1 | Q6NZI2    | Caveolae-assc  | Q6NZI2   | 2 | 1102.6 | 45671  |        | 56.29  |        | 45671  | 16033  |  |
| FALSE | High | LLDFGSLSNLQVTQPTVGMNFI |                | FALSE | 5.62E-05 | 0.0064 | 1 | 1  | 1 | P08708    | 40S ribosoma   | P08708   | 1 | 2763.4 | 45069  | 17703  | 116.45 | 108.05 | 14025  | 144825 |  |
| FALSE | High | LLDFGSLSNL             | 2xLabel:13C(6) | FALSE | 2.81E-05 | 0.0064 | 1 | 1  | 1 | P08708    | 40S ribosoma   | P08708   | 1 | 2775.5 |        |        |        |        |        |        |  |
| FALSE | High | LLDFGSLSNL             | 1xOxidation [M | FALSE | 0.013828 | 0.0064 | 1 | 1  | 1 | P08708    | 40S ribosoma   | P08708   | 2 | 3032.6 |        |        |        |        |        |        |  |
| FALSE | High | ILGADTSVDL             | 2xLabel:13C(6) | FALSE | 0.056668 | 0.0064 | 1 | 1  | 1 | P25705    | ATP synthase   | P25705   | 1 | 2569.4 | 28057  | 22140  | 66.72  | 96.29  | 20391  | 28057  |  |

|       |      |                            |       |          |        |   |    |   |            |                         |   |        |        |        |        |        |        |        |
|-------|------|----------------------------|-------|----------|--------|---|----|---|------------|-------------------------|---|--------|--------|--------|--------|--------|--------|--------|
| FALSE | High | LLPGEELAK                  | FALSE | 0.102333 | 0.0064 | 2 | 15 | 1 | O60814; Q  | Histone H2B t Q16778;   | 0 | 953.6  | 4E+06  | 805175 | 71.42  | 63.99  | 2E+06  | 8E+06  |
| FALSE | High | IITHPNFNGNTLDNDIMLIK       | TRUE  | 8.04E-13 | 0.0064 | 1 | 1  | 4 | cRAP112    | Trypsin OS=Su cRAP112   | 0 | 2283.2 | 7E+06  |        | 31.31  |        | 4E+06  | 7E+06  |
| FALSE | High | IITHPNFNNGN 1xOxidation [M | TRUE  | 0.000246 | 0.0064 | 1 | 1  | 2 | cRAP112    | Trypsin OS=Su cRAP112   | 0 | 2299.2 | 529976 |        | 39.59  |        | 313067 | 529976 |
| FALSE | High | IITHPNFNGNTLDNDIMLIKLSI    | TRUE  | 2.78E-07 | 0.0064 | 1 | 1  | 1 | cRAP112    | Trypsin OS=Su cRAP112   | 1 | 3309.7 | 2E+06  | 12323  | 24.99  |        | 1E+06  | 2E+06  |
| FALSE | High | LAHYNKR                    | FALSE | 0.002678 | 0.0064 | 2 | 15 | 1 | O60814; Q  | Histone H2B t Q16778;   | 1 | 901.5  | 426349 | 94811  | 21.3   | 34.38  | 387307 | 574138 |
| FALSE | High | LSAKPAPPKPEPKPK            | FALSE | 0.003228 | 0.0064 | 1 | 1  | 1 | P05204     | Non-histone c P05204    | 0 | 1584.9 | 208000 | 22026  | 43.48  | 41.67  | 107420 | 278818 |
| FALSE | High | LAADEDDED 3xLabel:13C(6)   | FALSE | 3.36E-06 | 0.0064 | 1 | 1  | 1 | P06748     | Nucleophosm P06748      | 2 | 4264.6 | 29454  | 70471  |        |        |        |        |
| FALSE | High | KTVTAMDVVYALKR             | FALSE | 9.32E-06 | 0.0064 | 1 | 1  | 1 | P62805     | Histone H4 O P62805     | 2 | 1594.9 | 38976  | 15328  | 51.65  |        | 36480  | 85754  |
| FALSE | High | GSCGIGGGIG 1xCarbamidom    | FALSE | 1.09E-07 | 0.0064 | 1 | 2  | 1 | P02533     | Keratin, type I P02533; | 0 | 1278.6 | 53660  |        | 21.68  |        | 61101  | 39220  |
| FALSE | High | GSGGGSSGGSIGGRGSSGGV       | TRUE  | 0.020474 | 0.0064 | 1 | 1  | 1 | P04264     | Keratin, type I P04264  | 1 | 1751.8 | 67188  |        | 39.14  |        | 98163  | 43775  |
| FALSE | High | GSLGGGFSSGGFSGGSFSR        | TRUE  | 2.39E-11 | 0.0064 | 1 | 1  | 1 | P13645     | Keratin, type I P13645  | 0 | 1707.8 | 238125 |        | 13.4   |        | 248288 | 191505 |
| FALSE | High | GTGASGSFKL 3xLabel:13C(6)  | FALSE | 0.140134 | 0.0064 | 2 | 5  | 1 | P16401; P: | Histone H1.5 (P16401;   | 2 | 1312.8 | 98762  | 77330  | 108.52 | 111.47 | 21426  | 341526 |
| FALSE | High | HAVSEGTKAVTK               | FALSE | 8.81E-10 | 0.0064 | 2 | 15 | 3 | O60814; Q  | Histone H2B t Q16778;   | 1 | 1227.7 |        |        |        |        |        |        |
| FALSE | High | HAVSEGTKA\ 2xLabel:13C(6)  | FALSE | 9.23E-08 | 0.0064 | 2 | 15 | 2 | O60814; Q  | Histone H2B t Q16778;   | 1 | 1239.7 | 2E+06  | 448778 | 22.4   | 26.06  | 1E+06  | 2E+06  |
| FALSE | High | HAVSEGTKA\ 3xLabel:13C(6)  | FALSE | 2.20E-05 | 0.0064 | 1 | 3  | 1 | O60814     | Histone H2B t O60814;   | 2 | 1796   | 258319 | 30780  | 86.77  | 110.74 |        | 527826 |
| FALSE | High | HAVSEGTKAVTKYTSSK          | FALSE | 2.72E-08 | 0.0064 | 1 | 12 | 3 | Q8N257     | Histone H2B t Q16778;   | 2 | 1793.9 | 895498 | 226813 | 100.14 | 100.79 | 146279 | 2E+06  |
| FALSE | High | HAVSEGTKA\ 3xLabel:13C(6)  | FALSE | 9.22E-07 | 0.0064 | 1 | 12 | 2 | Q8N257     | Histone H2B t Q16778;   | 2 | 1812   |        |        |        |        |        |        |
| FALSE | High | HGGGGGGFSGGGGFGSR          | TRUE  | 1.41E-07 | 0.0064 | 1 | 1  | 1 | P35908     | Keratin, type I P35908  | 0 | 1320.6 | 47874  |        | 23.35  |        | 50704  | 31872  |
| FALSE | High | HGLDNRYGY 1xCarbamidom     | TRUE  | 0.005928 | 0.0064 | 1 | 1  | 1 | cRAP078    | Lysozyme C O cRAP078    | 1 | 2181   | 63638  |        | 67.11  |        | 41409  | 149087 |
| FALSE | High | KGTVEGFEP\ 1xCarbamidom    | FALSE | 1.89E-07 | 0.0064 | 1 | 1  | 1 | P37108     | Signal recogni P37108   | 2 | 1934   | 30619  | 41112  | 104.96 | 70.17  | 7206.9 | 99839  |
| FALSE | High | KGTVEGFEP\ 1xCarbamidom    | FALSE | 3.24E-05 | 0.0064 | 1 | 1  | 1 | P37108     | Signal recogni P37108   | 2 | 1952   |        |        |        |        |        |        |
| FALSE | High | KIEEIKDFLLTAR              | FALSE | 8.56E-05 | 0.0064 | 1 | 1  | 1 | P63173     | 60S ribosoma P63173     | 2 | 1575.9 | 50938  |        | 48.08  |        | 36319  | 50938  |
| FALSE | High | KIIGLK                     | FALSE | 0.002425 | 0.0064 | 1 | 1  | 2 | Q6IN85     | Serine/threon Q6IN85    | 1 | 671.48 | 89033  | 73974  | 74.78  | 71.62  | 30079  | 176551 |
| FALSE | High | KYSQGNVSAVGVTYDGHTALT      | TRUE  | 7.56E-08 | 0.0064 | 1 | 1  | 1 | cRAP117    | 000000 rLys-(cRAP117    | 1 | 2324.2 | 2E+06  |        | 16.75  |        |        | 2E+06  |
| FALSE | High | YSQGNVSAVGVTYDGHTALTR      | TRUE  | 1.12E-12 | 0.0064 | 1 | 1  | 2 | cRAP117    | 000000 rLys-(cRAP117    | 0 | 2196.1 | 118254 |        | 46.83  |        | 118254 | 210749 |

| Abundan | Abundan | Abundan | Abundan | Precurso | Quan | Infr    | Quan              | Ch       | Found in          | Found in | Found in | Found in | Found in | Found in | Found in | Confiden | Percolatc | Percolatc | XCorr by | Top Apex | RT in min |
|---------|---------|---------|---------|----------|------|---------|-------------------|----------|-------------------|----------|----------|----------|----------|----------|----------|----------|-----------|-----------|----------|----------|-----------|
|         |         |         |         |          |      |         |                   |          | Indistinguishable | CI       | Not Fou  | Not Fou  | Not Fou  | Not Fou  | Not Fou  | Not Fou  | Not Fou   | Not Fou   | Not Fou  | High     |           |
| 520478  |         |         |         |          | 86   | Light   | Peak Fou          | High     | High              | Not Fou  | Not Fou  | Not Fou  | Not Fou  | Not Fou  | Not Fou  | Not Fou  | 0.0096    | 0.1209    | 3.45     | 136.91   |           |
| 2E+07   |         |         |         |          | 87   | Light   | Peak Fou          | High     | High              | Not Fou  | Not Fou  | Not Fou  | Not Fou  | Not Fou  | Not Fou  | Not Fou  | 0.0096    | 0.0082    | 4.36     | 139.62   |           |
| 810816  | 105655  | 277367  | 169458  |          | 88   | Light   | Peak Fou          | Peak Fou | High              | Peak Fou | Peak Fou | Peak Fou | Peak Fou | Peak Fou | Peak Fou | Peak Fou | 0.0096    | 0.2053    | 1.7      | 57.14    |           |
| 802681  | 95773   | 205171  | 187820  |          | 89   | Light   | Peak Fou          | High     | Peak Fou          | Peak Fou | Peak Fou | Peak Fou | Peak Fou | Peak Fou | Peak Fou | Peak Fou | 0.0095    | 0.0024    | 3.84     | 109.5    |           |
| 443413  | 24360   | 179701  | 73971   |          | 90   | Light   | Peak Fou          | High     | High              | Peak Fou | Peak Fou | Peak Fou | Peak Fou | Peak Fou | Peak Fou | Peak Fou | 0.0096    | 0.0368    | 3.15     | 94.47    |           |
| 23822   |         | 13392   | 4035.6  |          | 91   | Light   | Not Fou           | High     | Peak Fou          | Not Fou  | Peak Fou | Peak Fou | Peak Fou | Peak Fou | Peak Fou | Peak Fou | 0.0095    | 0.049     | 2.72     | 73.21    |           |
| 45160   |         |         |         |          | 85   | Light   | Peak Fou          | Peak Fou | High              | Not Fou  | Not Fou  | Not Fou  | Not Fou  | Not Fou  | Not Fou  | Not Fou  | 0.0096    | 0.029     | 3.79     | 41.43    |           |
| 402786  |         |         |         |          | 92   | Light   | Peak Fou          | High     | High              | Not Fou  | Not Fou  | Not Fou  | Not Fou  | Not Fou  | Not Fou  | Not Fou  | 0.0096    | 0.0003    | 5.66     | 144.44   |           |
|         |         |         |         |          | 94   | Redunda | Light             | Peak Fou | High              | Peak Fou | Not Fou  | Peak Fou | Peak Fou | Peak Fou | Peak Fou | Peak Fou | 0.0095    | 0.0105    | 3.58     | 189.79   |           |
| 54704   |         | 39677   | 11138   |          | 94   | Heavy   | Peak Fou          | Peak Fou | Peak Fou          | Not Fou  | High     | Peak Fou | Peak Fou | Peak Fou | Peak Fou | Peak Fou | 0.0095    | 0.0493    | 3.1      | 189.79   |           |
| 42531   |         |         |         |          | 95   | Light   | Not Fou           | Not Fou  | High              | Not Fou  | Not Fou  | Not Fou  | Not Fou  | Not Fou  | Not Fou  | Not Fou  | 0.0096    | 0.0392    | 3.9      | 110.69   |           |
|         |         |         |         |          | 96   | NoQuan\ | Heavy             | Not Fou  | Not Fou           | Not Fou  | Not Fou  | Not Fou  | Not Fou  | Not Fou  | Not Fou  | Not Fou  | 0.0095    | 0.0127    | 3.63     |          |           |
| 1E+06   |         | 7326.4  |         |          | 97   | Light   | Peak Fou          | High     | Peak Fou          | Not Fou  | Peak Fou | Not Fou  | Not Fou  | Not Fou  | Not Fou  | Not Fou  | 0.0095    | 0.0258    | 2.29     | 91.63    |           |
| 600521  |         |         |         |          | 98   | Light   | Not Fou           | Not Fou  | High              | Not Fou  | Not Fou  | Not Fou  | Not Fou  | Not Fou  | Not Fou  | Not Fou  | 0.0096    | 0.2671    | 2.27     | 87.56    |           |
| 66648   |         |         |         |          | 93   | Light   | Peak Fou          | Peak Fou | High              | Not Fou  | Not Fou  | Not Fou  | Not Fou  | Not Fou  | Not Fou  | Not Fou  | 0.0096    | 0.0147    | 3.44     | 51.29    |           |
| 645745  |         |         |         |          | 84   | Light   | Peak Fou          | High     | Peak Fou          | Not Fou  | Not Fou  | Not Fou  | Not Fou  | Not Fou  | Not Fou  | Not Fou  | 0.0095    | 0.0066    | 3.54     | 59.67    |           |
| 37529   | 30609   | 168241  | 59763   |          | 83   | Heavy   | Peak Fou          | Peak Fou | Peak Fou          | Peak Fou | High     | Peak Fou | Peak Fou | Peak Fou | Peak Fou | Peak Fou | 0.0095    | 0.0799    | 3.04     | 81.46    |           |
| 440483  |         |         |         |          | 82   | Light   | Peak Fou          | High     | High              | Not Fou  | Not Fou  | Not Fou  | Not Fou  | Not Fou  | Not Fou  | Not Fou  | 0.0095    | 0.0488    | 3.25     | 123.75   |           |
| 4E+06   |         |         |         |          | 69   | Light   | Peak Fou          | High     | Peak Fou          | Not Fou  | Not Fou  | Not Fou  | Not Fou  | Not Fou  | Not Fou  | Not Fou  | 0.0095    | 0.0672    | 2.09     | 74.01    |           |
|         |         |         |         |          |      |         | Indistinguishable | CI       | Not Fou           | Not Fou  | Not Fou  | Not Fou  | Not Fou  | Not Fou  | Not Fou  | Not Fou  | 0.0096    | 0.2072    | 2.75     | 133.22   |           |
| 17433   |         |         |         |          | 70   | Light   | Not Fou           | Peak Fou | High              | Not Fou  | Not Fou  | Not Fou  | Not Fou  | Not Fou  | Not Fou  | Not Fou  | 0.0096    | 0.0361    | 4.85     | 189.33   |           |
| 112792  |         |         |         |          | 71   | Light   | Peak Fou          | High     | Peak Fou          | Not Fou  | Not Fou  | Not Fou  | Not Fou  | Not Fou  | Not Fou  | Not Fou  | 0.0095    | 0.0159    | 3.46     | 189.06   |           |
| 127981  | 6738.2  | 42799   | 43672   |          | 72   | Light   | Peak Fou          | Peak Fou | High              | Peak Fou | Peak Fou | Peak Fou | Peak Fou | Peak Fou | Peak Fou | Peak Fou | 0.0096    | 0.0557    | 2.92     | 77.13    |           |
| 64614   | 6691.3  | 66838   | 44992   |          | 73   | Heavy   | Not Fou           | Not Fou  | Peak Fou          | Peak Fou | Peak Fou | Peak Fou | High     | High     | High     | High     | 0.0096    | 0.1651    | 2.84     | 183.2    |           |
|         |         |         |         |          |      |         | Inconsistently    | Labe     | Not Fou           | Not Fou  | Not Fou  | Not Fou  | Not Fou  | Not Fou  | Not Fou  | Not Fou  | 0.0096    | 0.2538    | 2.87     | 81.67    |           |
| 3E+07   |         | 52449   | 16562   |          | 75   | Light   | Peak Fou          | High     | High              | Not Fou  | Peak Fou | Peak Fou | Peak Fou | Peak Fou | Peak Fou | Peak Fou | 0.0095    | #####     | 7.44     | 168.17   |           |
| 747191  | 11438   | 63224   | 148100  |          | 74   | Light   | Peak Fou          | High     | High              | Peak Fou | Peak Fou | Peak Fou | Peak Fou | Peak Fou | Peak Fou | Peak Fou | 0.0095    | #####     | 6.29     | 159.69   |           |
| 414028  |         |         |         |          | 76   | Light   | Peak Fou          | Peak Fou | High              | Not Fou  | Not Fou  | Not Fou  | Not Fou  | Not Fou  | Not Fou  | Not Fou  | 0.0096    | 0.0017    | 5.17     | 190.55   |           |
| 343259  |         |         |         |          | 77   | Light   | Peak Fou          | Peak Fou | High              | Not Fou  | Not Fou  | Not Fou  | Not Fou  | Not Fou  | Not Fou  | Not Fou  | 0.0096    | 0.0037    | 5.83     | 181.57   |           |
| 34929   |         |         |         |          | 78   | Light   | Peak Fou          | Peak Fou | High              | Not Fou  | Not Fou  | Not Fou  | Not Fou  | Not Fou  | Not Fou  | Not Fou  | 0.0096    | 0.1315    | 3.21     | 136.47   |           |
| 41488   |         |         |         |          | 79   | Light   | Peak Fou          | High     | Peak Fou          | Not Fou  | Not Fou  | Not Fou  | Not Fou  | Not Fou  | Not Fou  | Not Fou  | 0.0095    | 0.0032    | 4.53     | 140.75   |           |
| 56980   |         |         |         |          | 80   | Light   | Peak Fou          | High     | Peak Fou          | Not Fou  | Not Fou  | Not Fou  | Not Fou  | Not Fou  | Not Fou  | Not Fou  | 0.0095    | 0.1326    | 1.4      | 68.41    |           |
| 4E+06   |         |         |         |          | 81   | Light   | Peak Fou          | High     | Peak Fou          | Not Fou  | Not Fou  | Not Fou  | Not Fou  | Not Fou  | Not Fou  | Not Fou  | 0.0095    | 0.004     | 3.39     | 124.31   |           |
| 3E+06   |         |         |         |          | 99   | Light   | Peak Fou          | Peak Fou | High              | Not Fou  | Not Fou  | Not Fou  | Not Fou  | Not Fou  | Not Fou  | Not Fou  | 0.0096    | 0.1911    | 2.27     | 88.67    |           |
| 262929  |         |         |         |          | 100  | Light   | Not Fou           | High     | High              | Not Fou  | Not Fou  | Not Fou  | Not Fou  | Not Fou  | Not Fou  | Not Fou  | 0.0095    | 0.0005    | 3.84     | 106.52   |           |
| 862817  |         |         |         |          | 101  | Light   | Peak Fou          | High     | High              | Not Fou  | Not Fou  | Not Fou  | Not Fou  | Not Fou  | Not Fou  | Not Fou  | 0.0095    | #####     | 6        | 186.65   |           |
| 118925  |         |         |         |          | 102  | Light   | Peak Fou          | High     | Peak Fou          | Not Fou  | Not Fou  | Not Fou  | Not Fou  | Not Fou  | Not Fou  | Not Fou  | 0.0095    | 0.1334    | 2.52     | 170.21   |           |
|         |         |         |         |          | 121  | NoQuan\ | Heavy             | Not Fou  | Not Fou           | Not Fou  | Not Fou  | High     | Not Fou  | High     | High     | High     | 0.0095    | 0.0004    | 4.92     |          |           |
| 34389   |         | 8464.9  | 4893.2  |          | 122  | Light   | Peak Fou          | Peak Fou | High              | Not Fou  | Peak Fou | Peak Fou | Peak Fou | Peak Fou | Peak Fou | Peak Fou | 0.0096    | 0.128     | 2.9      | 148.36   |           |



|        |        |        |        |            |       |                                                   |                                          |        |        |        |        |        |
|--------|--------|--------|--------|------------|-------|---------------------------------------------------|------------------------------------------|--------|--------|--------|--------|--------|
|        |        | 84695  | 101785 | 17         | Heavy | Not Four Not Foun Not Four Not Foun Peak Fou High | High                                     | 0.0096 | 0.0423 | 3.27   | 166.97 |        |
| 560069 | 20137  | 55910  | 57961  | 24         | Light | Peak Fou High                                     | High                                     | 0.0095 | 0.0282 | 3.42   | 71.13  |        |
| 328373 |        |        |        | 26         | Light | Peak Fou High                                     | High                                     | 0.0096 | 0.0001 | 7.67   | 123.18 |        |
| 43314  |        |        |        | 27         | Light | Peak Fou Peak Fou High                            | Not Foun Not Foun Not Foun High          | 0.0096 | 0.0005 | 6.08   | 149.01 |        |
| 46809  |        | 50187  | 34337  | 28         | Light | Not Foun Peak Fou High                            | Not Foun Peak Fou Peak Fou High          | 0.0096 | 0.1537 | 2.03   | 176.4  |        |
|        |        |        |        | 28 Redunda | Heavy | Not Foun Peak Fou Peak Fou Not Foun Peak Fou High | High                                     | 0.0096 | 0.1634 | 2.16   | 176.4  |        |
| 48183  |        | 11665  |        | 29         | Light | Peak Fou High                                     | Peak Fou Not Foun Peak Fou Not Foun High | 0.0095 | 0.1842 | 2.73   | 92.47  |        |
| 355947 |        | 14022  |        | 30         | Light | Peak Fou High                                     | Peak Fou Not Foun Peak Fou Not Foun High | 0.0095 | 0.022  | 2.62   | 159.31 |        |
| 188528 |        |        |        | 25         | Light | Peak Fou Peak Fou High                            | Not Foun Not Foun Not Foun High          | 0.0096 | 0.0598 | 3.1    | 121.72 |        |
| 172967 | 45522  | 78678  | 47868  | 16         | Light | Peak Fou High                                     | Peak Fou Peak Fou Peak Fou Peak Fou High | 0.0095 | 0.1597 | 2.67   | 118.37 |        |
| 555409 | 57664  | 185552 | 236314 | 15         | Light | Peak Fou Peak Fou High                            | Peak Fou Peak Fou Peak Fou High          | 0.0096 | 0.0665 | 3.24   | 75.28  |        |
| 61097  |        |        |        | 14         | Light | Peak Fou High                                     | High                                     | 0.0095 | 0.1461 | 2.15   | 84.38  |        |
| 139606 |        |        |        | 1          | Light | Peak Fou High                                     | High                                     | 0.0096 | 0.0001 | 7.1    | 69.36  |        |
| 56142  |        |        |        | 2          | Light | Not Foun High                                     | Peak Fou Not Foun Not Foun Not Foun High | 0.0095 | 0.0594 | 3.77   | 166.72 |        |
| 58041  |        |        |        | 3          | Light | Peak Fou Peak Fou High                            | Not Foun Not Foun Not Foun High          | 0.0096 | 0.0495 | 3.31   | 68.09  |        |
|        |        |        |        | 4          | Light | Peak Fou High                                     | Not Foun Not Foun Not Foun Not Foun High | 0.0095 | 0.029  | 2.54   | 188.39 |        |
| 885674 | 63361  | 59845  | 170279 | 5          | Light | Peak Fou Peak Fou High                            | Peak Fou Peak Fou Peak Fou High          | 0.0096 | 0.0128 | 3.35   | 65.6   |        |
| 3E+06  | 166753 | 806791 | 529758 | 6 NotUniq  | Light | Peak Fou High                                     | Peak Fou Peak Fou Peak Fou Peak Fou High | 0.0095 | 0.002  | 2.87   | 123.36 |        |
|        |        |        |        | 6 Redunda  | Heavy | Peak Fou Peak Fou Peak Fou Peak Fou High          | Peak Fou High                            | 0.0095 | 0.069  | 2.74   | 123.36 |        |
| 2E+07  |        |        |        | 7          | Light | Peak Fou Peak Fou High                            | Not Foun Not Foun Not Foun High          | 0.0096 | 0.0005 | 5.76   | 113.7  |        |
| 2E+07  |        |        |        | 8          | Light | Peak Fou High                                     | Peak Fou Not Foun Not Foun Not Foun High | 0.0095 | #####  | 7.55   | 139.12 |        |
| 3E+06  |        |        |        | 9          | Light | Peak Fou Peak Fou High                            | Not Foun Not Foun Not Foun High          | 0.0096 | 0.2138 | 2.89   | 115.65 |        |
| 108281 | 9088.7 | 156613 | 44694  | 10         | Light | Peak Fou High                                     | Peak Fou Peak Fou Peak Fou Peak Fou High | 0.0095 | 0.1227 | 2.25   | 74.34  |        |
| 99944  |        |        |        | 11         | Light | Peak Fou High                                     | Peak Fou Not Foun Not Foun Not Foun High | 0.0095 | 0.0626 | 3.86   | 170.27 |        |
| 84450  |        |        |        | 12         | Light | Peak Fou High                                     | Peak Fou Not Foun Not Foun Not Foun High | 0.0095 | 0.0312 | 3.03   | 80.65  |        |
| 130285 |        | 61730  | 30238  | 13 NotUniq | Light | Peak Fou High                                     | Peak Fou Not Foun Peak Fou Peak Fou High | 0.0095 | 0.045  | 3.55   | 191.76 |        |
|        |        |        |        | 13 Redunda | Heavy | Peak Fou Peak Fou Peak Fou Not Foun High          | Peak Fou High                            | 0.0095 | 0.0268 | 4.69   | 192.11 |        |
| 6E+06  | 174891 | 2E+06  | 1E+06  | 31         | Light | Peak Fou High                                     | Peak Fou Peak Fou Peak Fou Peak Fou High | 0.0095 | 0.0845 | 3.38   | 171.72 |        |
| 149249 | 12769  | 104830 | 82898  | 32         | Light | Peak Fou Peak Fou High                            | Peak Fou Peak Fou Peak Fou High          | 0.0096 | 0.2093 | 2.93   | 163.1  |        |
| 4E+06  |        |        |        | 33         | Light | Peak Fou High                                     | Peak Fou Not Foun Not Foun Not Foun High | 0.0095 | 0.0005 | 5.14   | 185.97 |        |
| 67203  |        |        |        | 34         | Light | Peak Fou Peak Fou High                            | Not Foun Not Foun Not Foun High          | 0.0096 | 0.0064 | 4.37   | 46.65  |        |
| 49803  |        | 65831  | 35001  | 51         | Light | Not Foun Not Foun High                            | Not Foun Peak Fou Peak Fou High          | 0.0096 | 0.0888 | 3.48   | 209.83 |        |
| 1E+07  |        |        |        | 52         | Light | Peak Fou High                                     | High                                     | 0.0095 | #####  | 5.29   | 151.32 |        |
| 54282  |        |        |        | 53         | Light | Peak Fou Peak Fou High                            | Not Foun Not Foun Not Foun High          | 0.0096 | 0.0087 | 4.81   | 151.36 |        |
| 41502  |        |        |        | 54         | Light | Peak Fou Peak Fou High                            | Not Foun Not Foun Not Foun High          | 0.0096 | 0.1059 | 3.61   | 64.31  |        |
| 590188 | 14850  | 16356  | 13442  | 55         | Light | Peak Fou Peak Fou High                            | Peak Fou Peak Fou Peak Fou High          | 0.0096 | 0.2328 | 1.86   | 13.81  |        |
| 64273  |        |        |        | 56         | Light | Peak Fou Peak Fou High                            | Not Foun Not Foun Not Foun High          | 0.0096 | 0.0741 | 2.62   | 22.55  |        |
| 61638  |        |        |        | 57         | Light | Peak Fou Peak Fou High                            | Not Foun Not Foun Not Foun High          | 0.0096 | 0.1734 | 2.6    | 26.18  |        |
|        | 8026.9 | 75389  | 17703  | 58         | Light | Peak Fou High                                     | Not Foun Peak Fou Peak Fou Peak Fou High | 0.0095 | 0.0088 | 3.06   | 196.88 |        |
|        |        |        |        | 58 Redunda | Heavy | Peak Fou Peak Fou Not Foun Peak Fou High          | Peak Fou High                            | 0.0095 | 0.0067 | 3.93   | 196.88 |        |
|        |        |        |        | 59 NoQuan\ | Light | Not Foun High                                     | Not Foun Not Foun Not Foun Not Foun High | 0.0095 | 0.0734 | 2.56   |        |        |
| 68955  | 9647.2 |        | 50811  | 60         | Heavy | Peak Fou Peak Fou Peak Fou                        | Peak Fou Not Foun High                   | High   | 0.0096 | 0.2123 | 3.09   | 188.46 |

|        |        |        |        |     |         |       |          |          |          |          |          |          |      |        |        |      |        |
|--------|--------|--------|--------|-----|---------|-------|----------|----------|----------|----------|----------|----------|------|--------|--------|------|--------|
| 4E+06  | 428059 | 2E+06  | 805175 | 61  | NotUniq | Light | Peak Fou | Peak Fou | High     | Peak Fou | Peak Fou | Peak Fou | High | 0.0096 | 0.2467 | 2.29 | 138.03 |
| 7E+06  |        |        |        | 62  |         | Light | Peak Fou | High     | High     | Not Foun | Not Foun | Not Foun | High | 0.0095 | #####  | 4.58 | 169.57 |
| 727379 |        |        |        | 63  |         | Light | Peak Fou | Peak Fou | High     | Not Foun | Not Foun | Not Foun | High | 0.0096 | 0.0549 | 3.08 | 161.36 |
| 2E+06  |        | 12323  |        | 64  |         | Light | Peak Fou | High     | Peak Fou | Not Foun | Peak Fou | Not Foun | High | 0.0095 | 0.0011 | 3.49 | 186.17 |
| 426349 | 94811  | 154001 | 83038  | 50  | NotUniq | Light | Peak Fou | Peak Fou | High     | Peak Fou | Peak Fou | Peak Fou | High | 0.0096 | 0.0983 | 1.35 | 14.24  |
| 208000 | 10806  | 27051  | 22026  | 66  |         | Light | Peak Fou | High     | Peak Fou | Peak Fou | Peak Fou | Peak Fou | High | 0.0095 | 0.0417 | 2.83 | 42.4   |
| 29454  |        |        | 70471  | 49  |         | Light | Not Foun | Not Foun | Peak Fou | Not Foun | Not Foun | High     | High | 0.0096 | 0.0195 | 3.83 | 105.61 |
| 38976  |        | 15328  |        | 47  |         | Light | Peak Fou | High     | Peak Fou | Not Foun | Peak Fou | Not Foun | High | 0.0095 | 0.0044 | 3.33 | 135.7  |
| 53660  |        |        |        | 35  |         | Light | Peak Fou | High     | Peak Fou | Not Foun | Not Foun | Not Foun | High | 0.0095 | 0.0008 | 3.52 | 68.92  |
| 67188  |        |        |        | 36  |         | Light | Peak Fou | High     | Peak Fou | Not Foun | Not Foun | Not Foun | High | 0.0095 | 0.0855 | 2.02 | 33.18  |
| 238125 |        |        |        | 37  |         | Light | Peak Fou | High     | Peak Fou | Not Foun | Not Foun | Not Foun | High | 0.0095 | #####  | 5.5  | 141.29 |
| 98762  | 18569  | 293045 | 77330  | 38  | NotUniq | Heavy | Peak Fou | Peak Fou | Peak Fou | Peak Fou | High     | Peak Fou | High | 0.0095 | 0.1822 | 1.16 | 40.04  |
|        |        |        |        | 39  | Redunda | Light | Peak Fou | High     | High     | Peak Fou | Peak Fou | Peak Fou | High | 0.0095 | 0.0001 | 4.71 | 26.24  |
| 2E+06  | 300217 | 514389 | 448778 | 39  | NotUniq | Heavy | Peak Fou | Peak Fou | Peak Fou | Peak Fou | High     | High     | High | 0.0095 | 0.0007 | 4.24 | 26.24  |
| 126421 | 7657.7 | 115740 | 30780  | 40  |         | Heavy | Not Foun | Peak Fou | Peak Fou | Peak Fou | High     | Peak Fou | High | 0.0095 | 0.0061 | 4.58 | 57.41  |
| 895498 | 66568  | 719528 | 226813 | 41  |         | Light | Peak Fou | High     | High     | Peak Fou | Peak Fou | Peak Fou | High | 0.0095 | 0.0005 | 5.92 | 55.18  |
|        |        |        |        | 41  | Redunda | Heavy | Peak Fou | Peak Fou | Peak Fou | Peak Fou | High     | High     | High | 0.0095 | 0.0098 | 4.5  | 55.18  |
| 47874  |        |        |        | 42  |         | Light | Peak Fou | Peak Fou | High     | Not Foun | Not Foun | Not Foun | High | 0.0096 | 0.009  | 4.21 | 66.12  |
| 63638  |        |        |        | 43  |         | Light | Peak Fou | Peak Fou | High     | Not Foun | Not Foun | Not Foun | High | 0.0096 | 0.1199 | 3.31 | 142.37 |
| 30619  | 10477  | 64759  | 41112  | 44  |         | Light | Peak Fou | High     | Peak Fou | Peak Fou | Peak Fou | Peak Fou | High | 0.0095 | 0.001  | 4.33 | 102.46 |
|        |        |        |        | 44  | Redunda | Heavy | Peak Fou | Peak Fou | Peak Fou | Peak Fou | High     | Peak Fou | High | 0.0095 | 0.0071 | 4.59 | 102.46 |
| 91649  |        |        |        | 45  |         | Light | Peak Fou | Peak Fou | High     | Not Foun | Not Foun | Not Foun | High | 0.0096 | 0.0425 | 2.87 | 145.6  |
| 89033  | 29120  | 147712 | 73974  | 46  |         | Light | Peak Fou | High     | Peak Fou | Peak Fou | Peak Fou | Peak Fou | High | 0.0095 | 0.0374 | 2.07 | 69.03  |
| 2E+06  |        |        |        | 48  |         | Light | Not Foun | High     | Peak Fou | Not Foun | Not Foun | Not Foun | High | 0.0095 | 0.0007 | 3.54 | 102.4  |
| 85941  |        |        |        | 136 |         | Light | Peak Fou | High     | High     | Not Foun | Not Foun | Not Foun | High | 0.0095 | #####  | 5.87 | 116.8  |

**Supplemental Table 4.5.** Raw Proteome discoverer output from the three replicates of Condition E

| Checked | Confid | Sequence                    | Modifications | Contamin | Quality  | PEF     | Quality | q <sup>-1</sup> | Numl | Numl | Numl      | Master Pr             | Master Protein Des | Protein Ac | Numb | Theo    | MH <sub>z</sub> | Abundance: | Abundance: | Abundance: | Abundance: |
|---------|--------|-----------------------------|---------------|----------|----------|---------|---------|-----------------|------|------|-----------|-----------------------|--------------------|------------|------|---------|-----------------|------------|------------|------------|------------|
| FALSE   | High   | AAAAAAAAAPAAAATAPTTAAT      |               | FALSE    | 5.87E-07 | 0.00611 |         | 1               | 1    | 1    | P37108    | Signal recognition p  | P37108             |            | 0    | 2368.21 |                 |            |            |            |            |
| FALSE   | High   | RKATGPPVSE 3xLabel:13C(6) [ |               | FALSE    | 1.31E-06 | 0.00611 |         | 1               | 1    | 1    | P16401    | Histone H1.5 OS=H     | P16401             |            | 2    | 1514.94 | 88151           | 149552     | 49.17      | 66.27      |            |
| FALSE   | High   | RKPDTIEVQQMK                |               | FALSE    | 0.000286 | 0.00611 |         | 1               | 3    | 2    | P35241    | Radixin OS=Homo       | P35241; P          |            | 1    | 1472.79 | 1373099         |            | 32.66      |            |            |
| FALSE   | High   | RKPDTIEVQQ 1xOxidation [M1  |               | FALSE    | 0.080761 | 0.00611 |         | 1               | 3    | 1    | P35241    | Radixin OS=Homo       | P35241; P          |            | 2    | 1915.02 | 40257           |            | 30.49      |            |            |
| FALSE   | High   | RLPDAHSDYA 2xLabel:13C(6) [ |               | FALSE    | 0.002962 | 0.00611 |         | 1               | 1    | 1    | Q96PK6    | RNA-binding protei    | Q96PK6             |            | 1    | 1312.68 | 6257            | 37414      | 54.63      | 29.22      |            |
| FALSE   | High   | RSTITSREIQTAVR              |               | FALSE    | 0.023255 | 0.00611 |         | 1               | 13   | 1    | Q16778    | Histone H2B type 2    | Q16778; C          |            | 2    | 1617.9  | 88702           | 36744      | 68.69      | 34.23      |            |
| FALSE   | High   | RTPPAGVFYQGW SATPIANGSL     |               | TRUE     | 4.81E-08 | 0.00611 |         | 1               | 1    | 7    | cRAP117   | 000000 rLys-C rLys    | cRAP117            |            | 2    | 3610.81 | 28231713        |            | 50.98      |            |            |
| FALSE   | High   | RVTIMPKDIQLAR               |               | FALSE    | 1.16E-06 | 0.00611 |         | 1               | 5    | 2    | P84243    | Histone H3.3 OS=H     | P84243; C          |            | 2    | 1540.9  | 445451          | 159922     | 101.82     | 66.99      |            |
| FALSE   | High   | SAHSIAQLQK                  |               | FALSE    | 0.001217 | 0.00611 |         | 1               | 1    | 1    | Q9ULS5    | Transmembrane ar      | Q9ULS5             |            | 0    | 1082.6  | 41504           |            | 11.92      |            |            |
| FALSE   | High   | SAINEVVTR 1xLabel:13C(6) [  |               | FALSE    | 4.35E-05 | 0.00611 |         | 1               | 1    | 2    | P62899    | 60S ribosomal prot    | P62899             |            | 0    | 994.562 | 72233           | 75404      | 25.74      | 65.04      |            |
| FALSE   | High   | SCQAQPTTM. 1xCarbamidome    |               | TRUE     | 0.00065  | 0.00611 |         | 1               | 1    | 1    | cRAP016   | Kappa-casein OS=B     | cRAP016            |            | 0    | 1250.56 | 78666           |            | 36.16      |            |            |
| FALSE   | High   | SGDAIVDM 1xCarbamidome      |               | FALSE    | 0.147458 | 0.00611 |         | 1               | 2    | 1    | P68104    | Elongation factor 1   | P68104; C          |            | 0    | 2995.4  | 27486           | 23315      | 43.45      |            |            |
| FALSE   | High   | SGGGGGGGF 1xCarbamidome     |               | FALSE    | 1.02E-06 | 0.00611 |         | 1               | 1    | 1    | P13647    | Keratin, type II cytc | P13647             |            | 1    | 2257.05 |                 |            |            |            |            |
| FALSE   | High   | SGGGGGGGG 1xCarbamidome     |               | TRUE     | 3.10E-13 | 0.00611 |         | 1               | 1    | 2    | P13645    | Keratin, type I cyto  | P13645             |            | 0    | 1549.68 | 44797           |            | 6.46       |            |            |
| FALSE   | High   | SGGGGGGGLSGGSIR             |               | TRUE     | 2.91E-06 | 0.00611 |         | 1               | 1    | 1    | P35527    | Keratin, type I cyto  | P35527             |            | 0    | 1232.6  | 569856          |            | 58.83      |            |            |
| FALSE   | High   | SGGGGGGRFS 1xCarbamidome    |               | TRUE     | 4.04E-06 | 0.00611 |         | 1               | 1    | 1    | P04264    | Keratin, type II cytc | P04264             |            | 1    | 2293.98 | 380324          |            | 28.63      |            |            |
| FALSE   | High   | RKATGPPVSELITK              |               | FALSE    | 2.82E-06 | 0.00611 |         | 1               | 1    | 1    | P16401    | Histone H1.5 OS=H     | P16401             |            | 2    | 1496.88 |                 |            |            |            |            |
| FALSE   | High   | RKASGPPVSELITK              |               | FALSE    | 0.000105 | 0.00611 |         | 1               | 2    | 1    | P10412    | Histone H1.4 OS=H     | P16402; P          |            | 2    | 1482.86 | 217116          | 63159      | 59.41      | 68.23      |            |
| FALSE   | High   | RHPEYAVSVLLR                |               | TRUE     | 9.72E-05 | 0.00611 |         | 1               | 1    | 1    | cRAP087   | Serum albumin OS=     | cRAP087            |            | 1    | 1439.81 |                 |            |            |            |            |
| FALSE   | High   | RGDLPFVVP RR                |               | FALSE    | 6.67E-05 | 0.00611 |         | 1               | 1    | 1    | P35579    | Myosin-9 OS=Homo      | P35579             |            | 2    | 1311.76 | 152399          |            | 23.97      |            |            |
| FALSE   | High   | MFGGPGTASRPSSSR             |               | FALSE    | 0.10185  | 0.00611 |         | 1               | 1    | 1    | P08670    | Vimentin OS=Homo      | P08670             |            | 0    | 1494.71 | 209453          | 17994      | 48.45      |            |            |
| FALSE   | High   | MSVQPTVSLC 1xLabel:13C(6) [ |               | FALSE    | 0.003736 | 0.00611 |         | 1               | 1    | 1    | P06748    | Nucleophosmin OS      | P06748             |            | 0    | 2233.24 | 11300           | 26265      | 40.45      | 70.12      |            |
| FALSE   | High   | MVFTSSADG 1xCarbamidome     |               | TRUE     | 6.51E-21 | 0.00611 |         | 1               | 1    | 5    | cRAP117   | 000000 rLys-C rLys    | cRAP117            |            | 0    | 2691.24 | 7682254         | 18463      | 23.23      | 114.02     |            |
| FALSE   | High   | MVFTSSADG 1xCarbamidome     |               | TRUE     | 5.98E-12 | 0.00611 |         | 1               | 1    | 3    | cRAP117   | 000000 rLys-C rLys    | cRAP117            |            | 0    | 2707.23 | 411272          |            | 54.64      |            |            |
| FALSE   | High   | NDEELNKLGR                  |               | FALSE    | 0.003147 | 0.00611 |         | 1               | 3    | 1    | Q93077    | Histone H2A type 1    | Q7L7L0; P          |            | 1    | 1300.69 | 45002           | 7031       | 40.38      | 8.16       |            |
| FALSE   | High   | NDYFSDFGVYSQISR             |               | TRUE     | 2.91E-11 | 0.00611 |         | 1               | 1    | 5    | cRAP117   | 000000 rLys-C rLys    | cRAP117            |            | 0    | 1884.84 | 3432455         |            | 22.51      |            |            |
| FALSE   | High   | NGLSLAALKKALAAAGYDVEK       |               | FALSE    | 0.13847  | 0.00611 |         | 1               | 1    | 1    | P16401    | Histone H1.5 OS=H     | P16401             |            | 2    | 2089.17 | 25225           | 39174      |            | 46.42      |            |
| FALSE   | High   | SLDLDLSIAEVK                |               | TRUE     | 0.083977 | 0.00611 |         | 1               | 1    | 1    | P04264    | Keratin, type II cytc | P04264             |            | 0    | 1302.72 | 162864          |            | 47.73      |            |            |
| FALSE   | High   | NGLSLAALKK 3xLabel:13C(6) [ |               | FALSE    | 0.096164 | 0.00611 |         | 1               | 1    | 1    | P16401    | Histone H1.5 OS=H     | P16401             |            | 2    | 2107.23 |                 |            |            |            |            |
| FALSE   | High   | NLKVP SGQN 2xLabel:13C(6) [ |               | FALSE    | 0.114095 | 0.00611 |         | 1               | 1    | 1    | Q9GZZ1    | N-alpha-acetyltran:   | Q9GZZ1             |            | 2    | 1839.96 |                 |            |            |            |            |
| FALSE   | High   | NTDGSTDY GILQINSR           |               | TRUE     | 2.70E-09 | 0.00611 |         | 1               | 1    | 2    | cRAP078   | Lysozyme C OS=Ga      | cRAP078            |            | 0    | 1753.84 | 427205          |            | 23.23      |            |            |
| FALSE   | High   | NVQALEIELQSQLALK            |               | TRUE     | 0.002624 | 0.00611 |         | 1               | 1    | 1    | P13645    | Keratin, type I cyto  | P13645             |            | 0    | 1797.01 | 33289           |            | 39.64      |            |            |
| FALSE   | High   | QVHPDTGISSK                 |               | FALSE    | 0.009242 | 0.00611 |         | 2               | 15   | 1    | Q16778; C | Histone H2B type 2    | Q16778; C          |            | 0    | 1168.6  | 421372          | 73655      | 76.8       | 88.69      |            |
| FALSE   | High   | RDLLLLLELK                  |               | TRUE     | 6.26E-06 | 0.00611 |         | 1               | 1    | 2    | cRAP117   | 000000 rLys-C rLys    | cRAP117            |            | 1    | 1100.67 | 3677032         |            | 22.54      |            |            |
| FALSE   | High   | RDLLLLLELKR                 |               | TRUE     | 4.85E-06 | 0.00611 |         | 1               | 1    | 3    | cRAP117   | 000000 rLys-C rLys    | cRAP117            |            | 2    | 1256.77 | 3171991         |            | 82.52      |            |            |
| FALSE   | High   | RGDLPFVVP RR                |               | FALSE    | 0.002059 | 0.00611 |         | 1               | 1    | 2    | P35579    | Myosin-9 OS=Homo      | P35579             |            | 1    | 1155.66 | 620731          |            | 34.31      |            |            |
| FALSE   | High   | NLCNIPVCSALL 3xCarbamidome  |               | TRUE     | 1.59E-06 | 0.00611 |         | 1               | 1    | 2    | cRAP078   | Lysozyme C OS=Ga      | cRAP078            |            | 0    | 2508.19 | 592271          | 20274      | 22.66      |            |            |
| FALSE   | High   | SISISVAR                    |               | TRUE     | 0.066321 | 0.00611 |         | 1               | 1    | 1    | P04264    | Keratin, type II cytc | P04264             |            | 0    | 832.489 | 1539474         |            | 111.45     |            |            |
| FALSE   | High   | SLYNLGGSK                   |               | FALSE    | 0.080761 | 0.00611 |         | 1               | 1    | 1    | P13647    | Keratin, type II cytc | P13647             |            | 0    | 938.494 | 168494          |            | 53.93      |            |            |
| FALSE   | High   | SPAQILQWQVLSNTVPAK          |               | TRUE     | 1.87E-10 | 0.00611 |         | 1               | 1    | 1    | cRAP016   | Kappa-casein OS=B     | cRAP016            |            | 0    | 1980.09 | 171891          |            | 43.68      |            |            |

|       |      |                               |       |          |         |   |    |   |                                        |   |         |          |        |        |       |
|-------|------|-------------------------------|-------|----------|---------|---|----|---|----------------------------------------|---|---------|----------|--------|--------|-------|
| FALSE | High | VLKQVHPDTC 2xLabel:13C(6) [   | FALSE | 0.010964 | 0.00611 | 2 | 15 | 1 | Q16778; C Histone H2B type 2 Q16778; C | 1 | 1520.88 | 170994   | 56026  | 91.96  | 4.55  |
| FALSE | High | VTIAQGGVLPNIQAVLLPK           | FALSE | 5.61E-08 | 0.00611 | 2 | 10 | 3 | Q93077; C Histone H2A type 1 Q16777; C | 0 | 1931.17 | 1876839  | 275157 | 72.29  | 73.99 |
| FALSE | High | VTIAQGGVLP 1xLabel:13C(6) [   | FALSE | 2.57E-07 | 0.00611 | 2 | 10 | 1 | Q93077; C Histone H2A type 1 Q16777; C | 0 | 1937.19 |          |        |        |       |
| FALSE | High | VTIAQGGVLPNIQAVLLPKKTESH      | FALSE | 0.128731 | 0.00611 | 2 | 8  | 1 | Q93077; C Histone H2A type 1 Q7L7L0; P | 2 | 2778.6  | 135344   | 54964  | 45.4   |       |
| FALSE | High | VTIAQGGVLP 3xLabel:13C(6) [   | FALSE | 0.107824 | 0.00611 | 2 | 8  | 1 | Q93077; C Histone H2A type 1 Q7L7L0; P | 2 | 2796.66 |          |        |        |       |
| FALSE | High | VTIMPK                        | FALSE | 0.042787 | 0.00611 | 1 | 5  | 1 | P84243 Histone H3.3 OS=H P84243; C     | 0 | 688.406 | 826033   | 202446 | 77.97  | 66.85 |
| FALSE | High | VTIMPK 1xLabel:13C(6) [       | FALSE | 0.030163 | 0.00611 | 1 | 5  | 1 | P84243 Histone H3.3 OS=H P84243; C     | 0 | 694.426 |          |        |        |       |
| FALSE | High | VHRLLR                        | FALSE | 0.066981 | 0.00611 | 2 | 12 | 1 | Q93077; C Histone H2A type 1 Q16777; C | 1 | 793.516 | 93738    | 41516  | 81.88  | 13.67 |
| FALSE | High | VTIMPKDIQLAR                  | FALSE | 0.00069  | 0.00611 | 1 | 5  | 3 | P84243 Histone H3.3 OS=H P84243; C     | 1 | 1384.8  | 202584   | 65700  | 96.66  | 43.75 |
| FALSE | High | YADLTEDQLP 1xCarbamidome      | FALSE | 1.46E-05 | 0.00611 | 1 | 1  | 1 | P18669 Phosphoglycerate r P18669       | 1 | 2437.2  | 17391    | 162157 |        | 35.54 |
| FALSE | High | YALYDATYETK                   | FALSE | 2.04E-06 | 0.00611 | 1 | 2  | 1 | P23528 Cofilin-1 OS=Homo P23528; C     | 0 | 1337.63 | 98475    | 41837  | 24     | 54.1  |
| FALSE | High | YALYDATYETI 1xLabel:13C(6) [  | FALSE | 0.001431 | 0.00611 | 1 | 2  | 1 | P23528 Cofilin-1 OS=Homo P23528; C     | 0 | 1343.65 |          |        |        |       |
| FALSE | High | YEKDIAAYR                     | FALSE | 0.001089 | 0.00611 | 1 | 2  | 2 | P26583 High mobility group P26583; P   | 1 | 1128.57 | 2575152  | 9209   | 43.6   | 11.49 |
| FALSE | High | YGTCIYQGR 1xCarbamidome       | FALSE | 0.000213 | 0.00611 | 1 | 2  | 1 | P59665 Neutrophil defensin P59665; P   | 0 | 1117.51 | 44839    |        | 26.52  |       |
| FALSE | High | YQKSTELLIR                    | FALSE | 0.002678 | 0.00611 | 1 | 5  | 1 | P84243 Histone H3.3 OS=H P84243; C     | 1 | 1250.71 | 71446    | 6769   |        |       |
| FALSE | High | YRPGTVALR 2xLabel:13C(6) [    | FALSE | 0.061871 | 0.00611 | 1 | 5  | 1 | P84243 Histone H3.3 OS=H P84243; C     | 0 | 1044.64 | 1675282  | 355079 | 70.98  | 75.59 |
| FALSE | High | WWCNDGR 1xCarbamidome         | TRUE  | 0.009525 | 0.00611 | 1 | 1  | 1 | cRAP078 Lysozyme C OS=Ga cRAP078       | 0 | 993.4   | 142655   |        | 21.41  |       |
| FALSE | High | LYAEERYPILP 1xCarbamidome     | TRUE  | 1.20E-05 | 0.00611 | 1 | 1  | 1 | cRAP086 Ovalbumin OS=Gal cRAP086       | 2 | 2845.46 | 17528    |        | 29.1   |       |
| FALSE | High | VHPAVVIR                      | FALSE | 0.010854 | 0.00611 | 1 | 1  | 1 | P62829 60S ribosomal prot P62829       | 0 | 890.557 | 288681   | 17205  | 39.81  | 69.85 |
| FALSE | High | VCNYVNWIQ 1xCarbamidome       | TRUE  | 0.010532 | 0.00611 | 1 | 1  | 1 | cRAP112 Trypsin OS=Sus scr cRAP112     | 0 | 1793.86 |          |        |        |       |
| FALSE | High | SRGSGGLGG/ 1xCarbamidome      | FALSE | 4.96E-08 | 0.00611 | 1 | 3  | 1 | P04259 Keratin, type II cyto P04259; P | 1 | 1667.77 | 120815   |        | 32.87  |       |
| FALSE | High | SSLLEKGLDGAKK                 | FALSE | 0.001004 | 0.00611 | 1 | 1  | 1 | P81605 Dermcidin OS=Homo P81605        | 2 | 1345.77 | 123742   |        | 55.41  |       |
| FALSE | High | STELLIR 1xLabel:13C(6) [      | FALSE | 0.034692 | 0.00611 | 1 | 5  | 1 | P84243 Histone H3.3 OS=H P84243; C     | 0 | 837.514 | 3621997  | 803670 | 54.88  | 79.89 |
| FALSE | High | STELLIRK                      | FALSE | 0.087309 | 0.00611 | 1 | 5  | 1 | P84243 Histone H3.3 OS=H P84243; C     | 1 | 959.588 | 25943    | 4394   | 80.73  | 23.81 |
| FALSE | High | STITSREIQTAVR                 | FALSE | 0.124073 | 0.00611 | 1 | 13 | 1 | Q16778 Histone H2B type 2 Q16778; C    | 1 | 1461.8  | 2076987  | 654985 | 62.78  | 62.86 |
| FALSE | High | STITSREIQTAV 2xLabel:13C(6) [ | FALSE | 8.77E-06 | 0.00611 | 1 | 13 | 3 | Q16778 Histone H2B type 2 Q16778; C    | 1 | 1473.84 |          |        |        |       |
| FALSE | High | STITSREIQTAV 3xLabel:13C(6) [ | FALSE | 0.003698 | 0.00611 | 1 | 13 | 2 | Q16778 Histone H2B type 2 Q16778; C    | 2 | 2414.45 | 281015   | 58976  | 69.17  | 74.14 |
| FALSE | High | VERADGYEPPVQESV               | FALSE | 0.000125 | 0.00611 | 1 | 1  | 1 | P61247 40S ribosomal prot P61247       | 1 | 1674.8  | 158979   | 98215  | 33.24  | 69.34 |
| FALSE | High | SYELPDGQVITIGNER              | FALSE | 5.84E-05 | 0.00611 | 1 | 10 | 1 | A5A3E0 POTE ankyrin dom: A5A3E0; F     | 0 | 1790.89 | 94996    | 25392  | 23.83  | 8.16  |
| FALSE | High | TPPAGVFYQGWSATPIANGSLG        | TRUE  | 0.012121 | 0.00611 | 1 | 1  | 1 | cRAP117 000000 rLys-C rLys cRAP117     | 0 | 3083.52 | 798439   |        | 63.89  |       |
| FALSE | High | TPPAGVFYQGWSATPIANGSLG        | TRUE  | 0.096164 | 0.00611 | 1 | 1  | 1 | cRAP117 000000 rLys-C rLys cRAP117     | 1 | 3454.7  | 59012    |        | 82.9   |       |
| FALSE | High | TPPAGVFYQGWSATPIANGSLG        | TRUE  | 1.24E-05 | 0.00611 | 1 | 1  | 1 | cRAP117 000000 rLys-C rLys cRAP117     | 2 | 3582.8  | 323791   |        | 106.6  |       |
| FALSE | High | TTHFVEGGDAGNREDQINR           | FALSE | 0.000368 | 0.00611 | 1 | 1  | 1 | P18124 60S ribosomal prot P18124       | 1 | 2115.98 | 47278    | 35804  | 20.48  | 71.36 |
| FALSE | High | TVTAMDVVYALK                  | FALSE | 0.001111 | 0.00611 | 1 | 1  | 1 | P62805 Histone H4 OS=Homo P62805       | 0 | 1310.7  | 169141   | 52642  | 77.63  | 66.48 |
| FALSE | High | TVTAMDVVY 1xLabel:13C(6) [    | FALSE | 0.000677 | 0.00611 | 1 | 1  | 1 | P62805 Histone H4 OS=Homo P62805       | 0 | 1316.72 |          |        |        |       |
| FALSE | High | VATVSLPR                      | TRUE  | 0.082354 | 0.00611 | 1 | 1  | 1 | cRAP112 Trypsin OS=Sus scr cRAP112     | 0 | 842.509 | 50894856 |        | 35.77  |       |
| FALSE | High | SYSKLLCGLLA 1xCarbamidome     | FALSE | 2.99E-07 | 0.00611 | 1 | 1  | 1 | P14174 Macrophage migr P14174          | 1 | 1521.85 | 27840    | 35496  | 42.14  | 70.17 |
| FALSE | High | LVNELTEFAK                    | TRUE  | 0.00409  | 0.00611 | 1 | 1  | 1 | cRAP087 Serum albumin OS= cRAP087      | 0 | 1163.63 | 31826    |        | 69.7   |       |
| FALSE | High | LSFSLKTQD 1xLabel:13C(6) [    | FALSE | 0.052759 | 0.00611 | 1 | 1  | 1 | Q9NWB6 Arginine and glutar Q9NWB6      | 1 | 1044.57 | 19196    | 22770  | 20.96  | 75.42 |
| FALSE | High | LSAKPAPPKPEPRPK               | FALSE | 0.000499 | 0.00611 | 1 | 1  | 1 | O00479 High mobility group O00479      | 0 | 1612.95 | 62002    | 4151   | 140.71 | 83.45 |
| FALSE | High | DGFGASGSCE 2xCarbamidome      | TRUE  | 0.165314 | 0.00611 | 1 | 1  | 1 | cRAP117 000000 rLys-C rLys cRAP117     | 0 | 2231.93 | 104171   |        | 16.53  |       |
| FALSE | High | DGFGASGSCE 2xCarbamidome      | TRUE  | 3.33E-08 | 0.00611 | 1 | 1  | 1 | cRAP117 000000 rLys-C rLys cRAP117     | 1 | 3307.46 | 66696    |        | 34.17  |       |



|       |      |                              |       |          |         |   |    |   |           |                       |           |   |         |          |         |        |       |
|-------|------|------------------------------|-------|----------|---------|---|----|---|-----------|-----------------------|-----------|---|---------|----------|---------|--------|-------|
| FALSE | High | DNIQGITKPAIR                 | FALSE | 0.000863 | 0.00611 | 1 | 1  | 1 | P62805    | Histone H4 OS=Hor     | P62805    | 0 | 1325.75 | 245847   | 49643   | 69.35  | 59.16 |
| FALSE | High | EIQTAVR                      | FALSE | 0.051717 | 0.00611 | 1 | 14 | 1 | Q16778    | Histone H2B type 2    | Q16778; C | 0 | 816.457 | 264670   | 60205   | 73.74  | 84.52 |
| FALSE | High | EIQTAVRLLLPGLAK              | FALSE | 0.044976 | 0.00611 | 1 | 14 | 1 | Q16778    | Histone H2B type 2    | Q16778; C | 1 | 1751.04 | 2098210  | 754029  | 78.99  | 56.11 |
| FALSE | High | EIQTAVRLLLP 2xLabel:13C(6) [ | FALSE | 0.073209 | 0.00611 | 1 | 14 | 1 | Q16778    | Histone H2B type 2    | Q16778; C | 1 | 1763.08 |          |         |        |       |
| FALSE | High | ENAGEDPGLAR                  | FALSE | 0.02898  | 0.00611 | 1 | 1  | 1 | P81605    | Dermcidin OS=Hon      | P81605    | 0 | 1128.53 | 40932    |         | 32.07  |       |
| FALSE | High | DAVEDLESVVK                  | FALSE | 0.000142 | 0.00611 | 1 | 1  | 1 | P81605    | Dermcidin OS=Hon      | P81605    | 0 | 1161.56 | 38710    |         | 101.75 |       |
| FALSE | High | EVQTAVRLLLI 2xLabel:13C(6) [ | FALSE | 0.00177  | 0.00611 | 1 | 1  | 1 | Q8N257    | Histone H2B type 3    | Q8N257    | 1 | 1749.07 | 65949    | 42605   | 51.38  | 77.59 |
| FALSE | High | GFGRGGAESHTFK                | FALSE | 0.031081 | 0.00611 | 1 | 1  | 1 | P50238    | Cysteine-rich prote   | P50238    | 1 | 1350.65 | 37316    |         | 38.82  |       |
| FALSE | High | GGGGGGYSGSSYSGGGSYC          | TRUE  | 1.27E-18 | 0.00611 | 1 | 1  | 2 | P04264    | Keratin, type II cytc | P04264    | 0 | 2383.95 | 34101    |         | 139.96 |       |
| FALSE | High | GGLEPINFQTAADQAR             | TRUE  | 2.97E-06 | 0.00611 | 1 | 1  | 2 | cRAP086   | Ovalbumin OS=Gal      | cRAP086   | 0 | 1687.84 | 45369    |         | 18.17  |       |
| FALSE | High | GGLYGGPSYC 1xCarbamidome     | TRUE  | 3.46E-06 | 0.00611 | 1 | 1  | 2 | cRAP117   | 000000 rLys-C rLys    | cRAP117   | 1 | 3593.6  | 618670   |         | 3.35   |       |
| FALSE | High | GGSGGGGSISGGYSGGGSGC         | TRUE  | 1.70E-10 | 0.00611 | 1 | 1  | 1 | P35908    | Keratin, type II cytc | P35908    | 0 | 1741.75 | 12793    | 3521    | 113.58 |       |
| FALSE | High | GGSGGSHGGSGFGGESGGSYC        | TRUE  | 6.41E-23 | 0.00611 | 1 | 1  | 3 | P35527    | Keratin, type I cyto  | P35527    | 0 | 3223.28 | 57045    | 6738    | 90.48  |       |
| FALSE | High | GGSGGSHGGSGFGGESGGSYC        | TRUE  | 1.29E-06 | 0.00611 | 1 | 1  | 1 | P35527    | Keratin, type I cyto  | P35527    | 1 | 3621.44 | 8383     |         | 116.99 |       |
| FALSE | High | FADLSEANR                    | FALSE | 0.000917 | 0.00611 | 1 | 1  | 1 | P08670    | Vimentin OS=Hom       | P08670    | 0 | 1093.53 | 60621    |         | 13.86  |       |
| FALSE | High | GIVFGR                       | FALSE | 0.066981 | 0.00611 | 1 | 1  | 1 | Q96S38    | Ribosomal protein     | Q96S38    | 0 | 648.383 | 65340    |         | 16.83  |       |
| FALSE | High | DAEAWFNEK                    | TRUE  | 0.006244 | 0.00611 | 1 | 4  | 1 | P13645    | Keratin, type I cyto  | Q7Z3Y7; F | 0 | 1109.49 | 47855    |         | 80.13  |       |
| FALSE | High | AYDNATAAVAK                  | TRUE  | 9.24E-05 | 0.00611 | 1 | 1  | 1 | cRAP117   | 000000 rLys-C rLys    | cRAP117   | 0 | 1094.55 | 30425970 |         | 20.41  |       |
| FALSE | High | AAFGGSGGRGSSSGGYSSGS!        | TRUE  | 1.40E-10 | 0.00611 | 1 | 1  | 1 | P35908    | Keratin, type II cytc | P35908    | 1 | 2501.07 | 171962   |         | 88.8   |       |
| FALSE | High | AAFGGSGGRGSSSGGYSSGS!        | TRUE  | 3.23E-06 | 0.00611 | 1 | 1  | 1 | P35908    | Keratin, type II cytc | P35908    | 2 | 3016.31 | 42101    |         | 37.86  |       |
| FALSE | High | AGLQFPVGR                    | FALSE | 0.001388 | 0.00611 | 3 | 15 | 2 | Q71UI9; C | Histone H2A.V OS=     | Q16777; C | 0 | 944.531 | 4912568  | 1455481 | 74.8   | 68.58 |
| FALSE | High | AGYRDGFGA! 2xCarbamidome     | TRUE  | 8.79E-08 | 0.00611 | 1 | 1  | 4 | cRAP117   | 000000 rLys-C rLys    | cRAP117   | 1 | 2679.15 | 14686726 |         | 27.74  |       |
| FALSE | High | AGYRDGFGA! 2xCarbamidome     | TRUE  | 9.57E-12 | 0.00611 | 1 | 1  | 6 | cRAP117   | 000000 rLys-C rLys    | cRAP117   | 2 | 3754.68 | 18102221 | 7324    | 52.08  | 82.86 |
| FALSE | High | ALAAGGYDV! 2xLabel:13C(6) [  | FALSE | 5.22E-05 | 0.00611 | 1 | 1  | 1 | P16401    | Histone H1.5 OS=H     | P16401    | 1 | 1576.81 | 11111    | 30237   |        | 59.53 |
| FALSE | High | ALCSEKLDQM 2xCarbamidome     | TRUE  | 0.098971 | 0.00611 | 1 | 1  | 1 | cRAP075   | Alpha-lactalbumin     | cRAP075   | 2 | 1892.92 | 69210    |         | 59.63  |       |
| FALSE | High | CCTKPESERM 3xCarbamidome     | TRUE  | 0.005262 | 0.00611 | 1 | 1  | 1 | cRAP087   | Serum albumin OS=     | cRAP087   | 1 | 2888.3  | 46044    |         | 47.03  |       |
| FALSE | High | ALKAWSVAR                    | TRUE  | 0.146147 | 0.00611 | 1 | 1  | 1 | cRAP087   | Serum albumin OS=     | cRAP087   | 1 | 1001.59 | 116825   |         | 74.14  |       |
| FALSE | High | AMGIMNSFV 1xOxidation [M2    | FALSE | 1.04E-08 | 0.00611 | 2 | 14 | 1 | Q16778; C | Histone H2B type 2    | Q16778; C | 0 | 1759.81 | 302034   | 101632  | 48.02  | 70.09 |
| FALSE | High | AMGIMNSFV 2xOxidation [M2    | FALSE | 2.11E-05 | 0.00611 | 2 | 14 | 1 | Q16778; C | Histone H2B type 2    | Q16778; C | 0 | 1775.81 | 329370   | 196940  | 76.15  | 63.79 |
| FALSE | High | AMGIMNSFV 2xOxidation [M2    | FALSE | 1.54E-07 | 0.00611 | 2 | 14 | 2 | Q16778; C | Histone H2B type 2    | Q16778; C | 0 | 1781.83 |          |         |        |       |
| FALSE | High | ASGPPVSELIT 1xLabel:13C(6) [ | FALSE | 0.001616 | 0.00611 | 1 | 3  | 2 | P10412    | Histone H1.4 OS=H     | P16402; P | 0 | 1204.69 | 420934   | 162170  | 86.68  | 69.82 |
| FALSE | High | ATGPPVSELIT 1xLabel:13C(6) [ | FALSE | 0.009525 | 0.00611 | 1 | 1  | 1 | P16401    | Histone H1.5 OS=H     | P16401    | 0 | 1218.7  | 79874    | 158533  | 27.18  | 70.82 |
| FALSE | High | AVFVDLEPTV 1xLabel:13C(6) [  | FALSE | 0.000313 | 0.00611 | 1 | 3  | 1 | Q71U36    | Tubulin alpha-1A cl   | Q71U36; I | 0 | 1707.93 | 10377    | 71935   |        | 55.31 |
| FALSE | High | AVKPKAAKPK                   | FALSE | 0.000587 | 0.00611 | 2 | 3  | 1 | P16401; P | Histone H1.5 OS=H     | P16401; P | 1 | 1037.68 | 58700    | 32148   | 56.31  | 65.73 |
| FALSE | High | AMGIMNSFV 1xLabel:13C(6) [   | FALSE | 3.03E-06 | 0.00611 | 2 | 14 | 1 | Q16778; C | Histone H2B type 2    | Q16778; C | 0 | 1749.84 | 272596   | 105449  | 65.04  | 52.41 |
| FALSE | High | YRPGTVALREIR                 | FALSE | 0.002992 | 0.00611 | 1 | 5  | 2 | P84243    | Histone H3.3 OS=H     | P84243; C | 1 | 1430.82 | 843531   | 151115  | 37.75  | 11.24 |
| FALSE | High | GSCGIGGGIG 1xCarbamidome     | FALSE | 1.75E-06 | 0.00611 | 1 | 2  | 1 | P02533    | Keratin, type I cyto  | P02533; P | 0 | 1278.59 | 103476   |         | 51.84  |       |
| FALSE | High | GSRGGSGSYGGGGSGGGYGG         | TRUE  | 5.20E-21 | 0.00611 | 1 | 1  | 2 | P35527    | Keratin, type I cyto  | P35527    | 1 | 2091.88 | 36168    |         | 123.43 |       |
| FALSE | High | LAADEDDDDI 3xLabel:13C(6) [  | FALSE | 3.78E-07 | 0.00611 | 1 | 1  | 1 | P06748    | Nucleophosmin OS      | P06748    | 2 | 4264.61 | 6718     | 40173   |        | 64.78 |
| FALSE | High | LAHYNKR                      | FALSE | 0.054361 | 0.00611 | 2 | 15 | 1 | Q16778; C | Histone H2B type 2    | Q16778; C | 1 | 901.5   | 81313    |         | 17.13  |       |
| FALSE | High | LAPDYDALDVANKIGII            | FALSE | 9.10E-07 | 0.00611 | 1 | 1  | 2 | P62750    | 60S ribosomal prot    | P62750    | 1 | 1800.97 | 188194   | 129452  | 43.68  | 16.53 |
| FALSE | High | LGKDAVEDLESVVK               | FALSE | 7.77E-05 | 0.00611 | 1 | 1  | 1 | P81605    | Dermcidin OS=Hon      | P81605    | 1 | 1459.76 | 120207   |         | 62.92  |       |

|       |      |                               |       |          |         |   |    |   |           |                               |   |         |         |         |        |  |  |        |       |
|-------|------|-------------------------------|-------|----------|---------|---|----|---|-----------|-------------------------------|---|---------|---------|---------|--------|--|--|--------|-------|
| FALSE | High | IGRIEDVTPIP! 3xLabel:13C(6) [ | FALSE | 0.027021 | 0.00611 | 1 | 1  | 1 | P62263    | 40S ribosomal prot P62263     | 2 | 1930.09 |         |         |        |  |  |        |       |
| FALSE | High | LGTRLVPAERR                   | FALSE | 0.004049 | 0.00611 | 1 | 1  | 1 | Q6NZI2    | Caveolae-associate Q6NZI2     | 2 | 1267.76 | 293029  |         |        |  |  | 40.3   |       |
| FALSE | High | IHRHLK                        | FALSE | 0.032349 | 0.00611 | 1 | 2  | 1 | Q71UI9    | Histone H2A.V OS= Q71UI9; P   | 1 | 803.5   | 68968   | 3592    |        |  |  | 25.87  |       |
| FALSE | High | KYSQGNVSAVGVTYDGHTALTR        | TRUE  | 3.77E-15 | 0.00611 | 1 | 1  | 1 | cRAP117   | 000000 rLys-C rLys:cRAP117    | 1 | 2324.16 | 1341189 |         |        |  |  | 3.45   |       |
| FALSE | High | LKEKYEK                       | FALSE | 0.063742 | 0.00611 | 1 | 4  | 2 | P26583    | High mobility group O15347; F | 2 | 937.535 | 77331   |         |        |  |  | 67     |       |
| FALSE | High | LLDFGSLSNLQVTQPTVGMNFK        | FALSE | 0.003661 | 0.00611 | 1 | 1  | 1 | P08708    | 40S ribosomal prot P08708     | 1 | 2763.45 | 37120   | 21571   |        |  |  | 70.84  | 27.17 |
| FALSE | High | LLLPGELAK                     | FALSE | 0.05887  | 0.00611 | 2 | 15 | 1 | Q16778; C | Histone H2B type 2 Q16778; C  | 0 | 953.603 | 3932073 | 1443102 |        |  |  | 83.04  | 53.01 |
| FALSE | High | LLQSDVDFSLADAINTEFKNTR        | FALSE | 0.054905 | 0.00611 | 1 | 1  | 1 | P08670    | Vimentin OS=Hom P08670        | 1 | 2497.26 | 43181   |         |        |  |  | 28.3   |       |
| FALSE | High | LLRKGNYAER                    | FALSE | 0.009719 | 0.00611 | 2 | 9  | 1 | Q93077; C | Histone H2A type 1 Q16777; C  | 2 | 1219.69 | 106586  | 29222   |        |  |  | 78.1   | 76.8  |
| FALSE | High | IITHPNFNGNTLDNDIMLIK          | TRUE  | 4.31E-10 | 0.00611 | 1 | 1  | 2 | cRAP112   | Trypsin OS=Sus scri cRAP112   | 0 | 2283.18 | 8038655 |         |        |  |  | 45.9   |       |
| FALSE | High | IITHPNFNGNTLDNDIMLIKLSSP      | TRUE  | 3.95E-11 | 0.00611 | 1 | 1  | 2 | cRAP112   | Trypsin OS=Sus scri cRAP112   | 1 | 3309.73 | 1063314 | 4921    |        |  |  | 51.71  | 23.38 |
| FALSE | High | IMLKGDNITLI 1xLabel:13C(6) [  | FALSE | 0.007045 | 0.00611 | 1 | 1  | 1 | P62304    | Small nuclear ribon P62304    | 1 | 1751.97 | 30625   | 148919  |        |  |  | 63.17  | 41.61 |
| FALSE | High | LLCGLLAER 1xCarbamidome       | FALSE | 0.056011 | 0.00611 | 1 | 1  | 1 | P14174    | Macrophage migra P14174       | 0 | 1050.61 | 19930   | 66363   |        |  |  | 22.99  | 44.7  |
| FALSE | High | GSGSGQSPSSGQHGTGFR            | FALSE | 0.053822 | 0.00611 | 1 | 1  | 1 | Q86YZ3    | Hornerin OS=Hom Q86YZ3        | 0 | 1747.77 | 30851   |         |        |  |  | 34.11  |       |
| FALSE | High | KVPQVSTPTLVEVSR               | TRUE  | 4.44E-05 | 0.00611 | 1 | 2  | 1 | cRAP087   | Serum albumin OS: cRAP087;    | 1 | 1639.94 | 110391  |         |        |  |  | 47.9   |       |
| FALSE | High | KLLEAQSHFR                    | FALSE | 0.056571 | 0.00611 | 1 | 1  | 1 | Q13813    | Spectrin alpha chain Q13813   | 1 | 1228.68 | 81624   |         |        |  |  | 36.9   |       |
| FALSE | High | GTDVQAWIR                     | TRUE  | 0.000174 | 0.00611 | 1 | 1  | 1 | cRAP078   | Lysozyme C OS=Ga cRAP078      | 0 | 1045.54 | 160739  |         |        |  |  | 8.04   |       |
| FALSE | High | GTGASGSFKLNK                  | FALSE | 0.005315 | 0.00611 | 2 | 5  | 1 | P16401; P | Histone H1.5 OS=H P16401; P   | 1 | 1166.62 |         |         |        |  |  |        |       |
| FALSE | High | GTGASGSFKL 2xLabel:13C(6) [   | FALSE | 0.003889 | 0.00611 | 2 | 5  | 1 | P16401; P | Histone H1.5 OS=H P16401; P   | 1 | 1178.66 | 99611   | 117865  | 103.45 |  |  |        | 75.73 |
| FALSE | High | GYSLGNWVC 1xCarbamidome       | TRUE  | 0.005478 | 0.00611 | 1 | 1  | 1 | cRAP078   | Lysozyme C OS=Ga cRAP078      | 0 | 1325.63 | 98455   |         |        |  |  | 15.13  |       |
| FALSE | High | HAVSEGKAVTK                   | FALSE | 5.31E-09 | 0.00611 | 2 | 15 | 3 | Q16778; C | Histone H2B type 2 Q16778; C  | 1 | 1227.67 | 2305143 | 490877  | 47.63  |  |  |        | 82.86 |
| FALSE | High | HAVSEGKAV 2xLabel:13C(6) [    | FALSE | 2.95E-08 | 0.00611 | 2 | 15 | 2 | Q16778; C | Histone H2B type 2 Q16778; C  | 1 | 1239.71 |         |         |        |  |  |        |       |
| FALSE | High | HAVSEGKAVTKYTSSK              | FALSE | 8.36E-10 | 0.00611 | 2 | 12 | 4 | Q16778; C | Histone H2B type 2 Q16778; C  | 2 | 1793.94 | 665761  | 332061  | 111.4  |  |  |        | 72.58 |
| FALSE | High | KIVITDCGQLS 1xCarbamidome     | FALSE | 0.00123  | 0.00611 | 1 | 1  | 1 | P30405    | Peptidyl-prolyl cis-1 P30405  | 1 | 1239.67 |         |         |        |  |  |        |       |
| FALSE | High | HAVSEGKAV 3xLabel:13C(6) [    | FALSE | 1.57E-08 | 0.00611 | 2 | 12 | 3 | Q16778; C | Histone H2B type 2 Q16778; C  | 2 | 1812    |         |         |        |  |  |        |       |
| FALSE | High | HGLDNYRGY! 1xCarbamidome      | TRUE  | 0.061259 | 0.00611 | 1 | 1  | 1 | cRAP078   | Lysozyme C OS=Ga cRAP078      | 1 | 2181.03 | 77169   |         |        |  |  | 19.17  |       |
| FALSE | High | HGSSSSSSHYGQHGSGR             | FALSE | 1.50E-09 | 0.00611 | 1 | 1  | 1 | Q86YZ3    | Hornerin OS=Hom Q86YZ3        | 0 | 1858.78 | 6877    |         |        |  |  | 118.57 |       |
| FALSE | High | HGVQEIEIQLSQLSK               | TRUE  | 0.000387 | 0.00611 | 1 | 1  | 1 | P35527    | Keratin, type I cyto P35527   | 0 | 1837.97 | 23375   |         |        |  |  | 59.84  |       |
| FALSE | High | HLQLAIRNDE 3xLabel:13C(6) [   | FALSE | 0.099923 | 0.00611 | 1 | 7  | 1 | Q99878    | Histone H2A type 1 Q16777; C  | 2 | 2122.25 | 81231   | 25551   | 85.57  |  |  |        | 61.36 |
| FALSE | High | KALAAAGYDVEKNNSR              | FALSE | 0.000111 | 0.00611 | 1 | 5  | 1 | P10412    | Histone H1.4 OS=H P16402; P   | 2 | 1706.88 | 61591   | 30305   | 48     |  |  |        | 21.76 |
| FALSE | High | KATGPPVSELI 2xLabel:13C(6) [  | FALSE | 2.53E-05 | 0.00611 | 1 | 1  | 1 | P16401    | Histone H1.5 OS=H P16401      | 1 | 1352.82 | 161972  | 270347  | 54.49  |  |  |        | 68.97 |
| FALSE | High | KIEIKDFLLTAR                  | FALSE | 0.000541 | 0.00611 | 1 | 1  | 1 | P63173    | 60S ribosomal prot P63173     | 2 | 1575.91 | 89404   | 5795    | 46.79  |  |  |        |       |
| FALSE | High | HGGGGGGFGGGGFGSR              | TRUE  | 6.78E-09 | 0.00611 | 1 | 1  | 1 | P35908    | Keratin, type II cyto P35908  | 0 | 1320.58 | 67433   |         |        |  |  | 33.15  |       |
| FALSE | High | YSQGNVSAVGVTYDGHTALTR         | TRUE  | 3.66E-10 | 0.00611 | 1 | 1  | 2 | cRAP117   | 000000 rLys-C rLys:cRAP117    | 0 | 2196.07 | 2464041 |         |        |  |  | 22     |       |

| Abundance | Abundance | Abundance | Abundance | Abundance | Abundance | Abundance | Precur | Quan      | Ir        | Quan      | Cl        | Found in         | Found in  | Found in  | Found in  | Found in  | Found in  | Confide   | Percolato | Percolato | XCorr   | by Top | Apex   | RT |
|-----------|-----------|-----------|-----------|-----------|-----------|-----------|--------|-----------|-----------|-----------|-----------|------------------|-----------|-----------|-----------|-----------|-----------|-----------|-----------|-----------|---------|--------|--------|----|
|           |           |           |           |           |           |           |        |           |           |           |           | Indistinguishabl | Not Found | Not Found | Not Found | Not Found | Not Found | Not Found | High      | 0.00952   | 0.01364 | 4.38   | 136.14 |    |
| 30200     | 91035     | 88151     | 54815     | 149552    | 259609    | 94        | Heavy  | Peak Four | Peak Four | Peak Four | Peak Four | Peak Four        | Peak Four | High      | High      | High      | High      | High      | 0.00952   | 0.01649   | 3.59    | 80.38  |        |    |
| 1299181   | 2264745   | 1373099   |           |           |           | 95        | Light  | Peak Four | High      | High      | Not Found | Not Found        | Not Found | High      | High      | High      | High      | High      | 0.00848   | 0.01894   | 3.33    | 58.52  |        |    |
| 40257     | 62351     | 36133     |           |           |           | 96        | Light  | Peak Four | High      | Peak Four | Not Found | Not Found        | Not Found | High      | High      | High      | High      | High      | 0.00848   | 0.1143    | 2.28    | 41.32  |        |    |
| 4750      | 12943     | 6257      | 23832     | 43905     | 37414     | 97        | Heavy  | Peak Four | Peak Four | Peak Four | Peak Four | Peak Four        | Peak Four | High      | High      | High      | High      | High      | 0.00952   | 0.09798   | 2.97    | 51.15  |        |    |
| 21417     | 130767    | 88702     |           | 28704     | 47036     | 98        | Light  | Peak Four | High      | Peak Four | Not Found | Peak Four        | Peak Four | Peak Four | High      | High      | High      | High      | 0.00848   | 0.0771    | 3.22    | 69.85  |        |    |
| 32720126  | 28231713  | 9967951   |           |           |           | 99        | Light  | Peak Four | High      | High      | Not Found | Not Found        | Not Found | High      | High      | High      | High      | High      | 0.00848   | 0.00422   | 5.09    | 130.69 |        |    |
| 281172    | 1901984   | 445451    | 73502     | 315327    | 159922    | 100       | Light  | Peak Four | High      | High      | Peak Four | Peak Four        | Peak Four | High      | High      | High      | High      | High      | 0.00848   | 0.01065   | 3.84    | 108.86 |        |    |
| 34395     | 41504     | 43374     |           |           |           | 101       | Light  | Peak Four | High      | Peak Four | Not Found | Not Found        | Not Found | High      | High      | High      | High      | High      | 0.00848   | 0.03013   | 3.44    | 48.99  |        |    |
| 48942     | 83319     | 72233     | 30620     | 75404     | 134645    | 102       | Heavy  | Peak Four | Peak Four | Peak Four | Peak Four | High             | High      | High      | High      | High      | High      | High      | 0.00848   | 0.02152   | 3.2     | 80.29  |        |    |
| 106441    | 78666     | 49811     |           |           |           | 103       | Light  | Peak Four | Peak Four | High      | Not Found | Not Found        | Not Found | High      | High      | High      | High      | High      | 0.00952   | 0.06933   | 3.4     | 49.95  |        |    |
| 11112     | 28247     | 27486     |           |           | 23315     | 104       | Light  | Peak Four | Peak Four | High      | Not Found | Not Found        | Peak Four | High      | High      | High      | High      | High      | 0.00952   | 0.2333    | 3.13    | 189.58 |        |    |
|           |           |           |           |           |           | 105       | NoQuan | Light     | Not Found | Not Found | High      | Not Found        | Not Found | Not Found | High      | High      | High      | High      | 0.00952   | 0.01552   | 4.52    |        |        |    |
| 44714     | 44797     | 49957     |           |           |           | 106       | Light  | Peak Four | High      | High      | Not Found | Not Found        | Not Found | High      | High      | High      | High      | High      | 0.00952   | 0.00047   | 5.98    | 57.34  |        |    |
| 482257    | 569856    | 1332458   |           |           |           | 107       | Light  | Peak Four | Peak Four | High      | Not Found | Not Found        | Not Found | High      | High      | High      | High      | High      | 0.00952   | 0.01984   | 3.7     | 57.76  |        |    |
| 439621    | 242114    | 380324    |           |           |           | 108       | Light  | Peak Four | High      | Peak Four | Not Found | Not Found        | Not Found | High      | High      | High      | High      | High      | 0.00848   | 0.00485   | 4.96    | 98.15  |        |    |
|           |           |           |           |           |           | 94        | Reduc  | Light     | Peak Four | Peak Four | High      | Peak Four        | Peak Four | Peak Four | High      | High      | High      | High      | 0.00952   | 0.01967   | 3.7     | 80.38  |        |    |
| 78778     | 323331    | 217116    | 23908     | 63159     | 115896    | 93        | Light  | Peak Four | High      | Peak Four | Peak Four | Peak Four        | Peak Four | High      | High      | High      | High      | High      | 0.00848   | 0.01375   | 4.38    | 77.81  |        |    |
|           |           |           |           |           |           | 92        | NoQuan | Light     | Not Found | High      | Not Found | Not Found        | Not Found | High      | High      | High      | High      | High      | 0.00848   | 0.01342   | 3.33    |        |        |    |
| 168532    | 152399    | 103429    |           |           |           | 91        | Light  | Peak Four | Peak Four | High      | Not Found | Not Found        | Not Found | High      | High      | High      | High      | High      | 0.00952   | 0.04101   | 3.52    | 100.83 |        |    |
| 122273    | 337022    | 209453    |           | 17994     |           | 76        | Light  | Peak Four | High      | Peak Four | Not Found | Peak Four        | Not Found | High      | High      | High      | High      | High      | 0.00848   | 0.1231    | 1.41    | 64.05  |        |    |
| 8420      |           | 15165     |           | 15248     | 45240     | 77        | Heavy  | Peak Four | Not Found | Peak Four | Not Found | Peak Four        | High      | High      | High      | High      | High      | High      | 0.00952   | 0.1034    | 3.44    | 215.93 |        |    |
| 9415710   | 7682254   | 5860139   | 18463     | 10879     | 98717     | 78        | Light  | Peak Four | High      | High      | Peak Four | Peak Four        | Peak Four | High      | High      | High      | High      | High      | 0.00952   | 7.46E-06  | 8.2     | 167.65 |        |    |
| 438605    | 411272    | 119939    |           |           |           | 79        | Light  | Peak Four | High      | Peak Four | Not Found | Not Found        | Not Found | High      | High      | High      | High      | High      | 0.00848   | 6.61E-05  | 8.45    | 156.06 |        |    |
|           | 60364     | 33550     |           | 6636      | 7449      | 80        | Light  | Not Found | High      | Peak Four | Not Found | Peak Four        | Peak Four | High      | High      | High      | High      | High      | 0.00848   | 0.04083   | 2.9     | 121.18 |        |    |
| 3432455   | 3436577   | 2249297   |           |           |           | 81        | Light  | Peak Four | High      | High      | Not Found | Not Found        | Not Found | High      | High      | High      | High      | High      | 0.00848   | 0.00104   | 4.92    | 190.1  |        |    |
|           | 25225     |           |           | 55084     | 27860     | 82        | Light  | Not Found | High      | Not Found | Not Found | Peak Four        | Peak Four | High      | High      | High      | High      | High      | 0.00848   | 0.1361    | 3.11    | 167.75 |        |    |
| 212470    | 72087     | 162864    |           |           |           | 109       | Light  | Peak Four | High      | Peak Four | Not Found | Not Found        | Not Found | High      | High      | High      | High      | High      | 0.00848   | 0.1156    | 3.02    | 199.07 |        |    |
|           |           |           |           |           |           | 82        | Reduc  | Heavy     | Not Found | Peak Four | Not Found | Not Found        | High      | Peak Four | High      | High      | High      | High      | 0.00848   | 0.121     | 2.52    | 167.75 |        |    |
|           |           |           |           |           |           | 84        | NoQuan | Heavy     | Not Found | Not Found | Not Found | Not Found        | Not Found | High      | High      | High      | High      | High      | 0.00952   | 0.2201    | 2.73    |        |        |    |
| 435063    | 427205    | 278319    |           |           |           | 85        | Light  | Peak Four | High      | High      | Not Found | Not Found        | Not Found | High      | High      | High      | High      | High      | 0.00848   | 0.00112   | 5.39    | 139.58 |        |    |
| 33289     | 35398     | 15226     |           |           |           | 86        | Light  | Peak Four | High      | Peak Four | Not Found | Not Found        | Not Found | High      | High      | High      | High      | High      | 0.00848   | 0.03851   | 3.3     | 194.76 |        |    |
| 35381     | 458288    | 421372    | 10430     | 73655     | 146867    | 87        | NotUni | Light     | Peak Four | High      | Peak Four | Peak Four        | Peak Four | Peak Four | High      | High      | High      | High      | 0.00848   | 0.0576    | 1.75    | 40.68  |        |    |
| 3999452   | 3677032   | 2538715   |           |           |           | 88        | Light  | Peak Four | Peak Four | High      | Not Found | Not Found        | Not Found | High      | High      | High      | High      | High      | 0.00952   | 0.02373   | 3.44    | 123.2  |        |    |
| 8952939   | 3171991   | 1747931   |           |           |           | 89        | Light  | Peak Four | High      | High      | Not Found | Not Found        | Not Found | High      | High      | High      | High      | High      | 0.00848   | 0.00736   | 3.77    | 102.8  |        |    |
| 807565    | 620731    | 391961    |           |           |           | 90        | Light  | Peak Four | High      | Peak Four | Not Found | Not Found        | Not Found | High      | High      | High      | High      | High      | 0.00848   | 0.03564   | 2.98    | 122.73 |        |    |
| 509054    | 786892    | 592271    |           |           | 20274     | 83        | Light  | Peak Four | High      | High      | Not Found | Not Found        | Not Found | Peak Four | High      | High      | High      | High      | 0.00848   | 0.00408   | 5.31    | 181.27 |        |    |
| 1539474   | 1078827   | 8365539   |           |           |           | 110       | Light  | Peak Four | Peak Four | High      | Not Found | Not Found        | Not Found | High      | High      | High      | High      | High      | 0.00952   | 0.1956    | 1.86    | 90.19  |        |    |
| 168494    | 80287     | 264910    |           |           |           | 111       | Light  | Peak Four | Peak Four | High      | Not Found | Not Found        | Not Found | High      | High      | High      | High      | High      | 0.00952   | 0.204     | 2.62    | 89.86  |        |    |
| 335326    | 171891    | 161784    |           |           |           | 112       | Light  | Peak Four | Peak Four | High      | Not Found | Not Found        | Not Found | High      | High      | High      | High      | High      | 0.00952   | 0.00208   | 5       | 186.22 |        |    |

|          |          |          |        |        |         |     |                   |           |           |           |           |           |           |      |         |         |      |        |
|----------|----------|----------|--------|--------|---------|-----|-------------------|-----------|-----------|-----------|-----------|-----------|-----------|------|---------|---------|------|--------|
| 17876    | 344912   | 170994   |        | 54252  | 57859   | 130 | NotUni Heavy      | Peak Four | Peak Four | Peak Four | Not Found | Peak Four | High      | High | 0.00952 | 0.1315  | 2.83 | 56.22  |
| 282511   | 2372299  | 1876839  | 52516  | 275157 | 416725  | 131 | NotUni Light      | Peak Four | High      | High      | Peak Four | Peak Four | Peak Four | High | 0.00952 | 0.00788 | 3.65 | 207.66 |
|          |          |          |        |        |         | 131 | Redunc Heavy      | Peak Four | Peak Four | Peak Four | Peak Four | Peak Four | High      | High | 0.00952 | 0.01127 | 4.24 | 207.65 |
| 76720    | 135344   | 201955   |        |        | 54964   | 132 | NotUni Light      | Peak Four | Peak Four | High      | Not Found | Not Found | Peak Four | High | 0.00952 | 0.2263  | 1.43 | 146.3  |
|          |          |          |        |        |         | 132 | Redunc Heavy      | Peak Four | Peak Four | Peak Four | Not Found | Not Found | High      | High | 0.00952 | 0.2175  | 1.79 | 146.3  |
| 179013   | 1460574  | 826033   | 42808  | 202446 | 260362  | 133 | Light             | Peak Four | High      | Peak Four | Peak Four | Peak Four | Peak Four | High | 0.00848 | 0.09367 | 2.05 | 71.22  |
|          |          |          |        |        |         | 133 | Redunc Heavy      | Peak Four | Peak Four | Peak Four | Peak Four | High      | Peak Four | High | 0.00848 | 0.08381 | 1.88 | 71.22  |
| 35279    | 223049   | 93738    |        | 45743  | 37680   | 129 | NotUni Light      | Peak Four | High      | Peak Four | Not Found | Peak Four | Peak Four | High | 0.00848 | 0.1078  | 1.37 | 33.39  |
| 160603   | 867308   | 202584   | 56932  | 122857 | 65700   | 134 | Light             | Peak Four | High      | High      | Peak Four | Peak Four | Peak Four | High | 0.00848 | 0.04168 | 2.82 | 123.79 |
|          |          | 17391    | 84931  | 162157 | 180258  | 136 | Heavy             | Not Found | Not Found | Peak Four | Peak Four | Peak Four | High      | High | 0.00952 | 0.02887 | 2.99 | 150.51 |
| 86340    | 135545   | 98475    | 17978  | 41837  | 61766   | 137 | Light             | Peak Four | Peak Four | High      | Peak Four | Peak Four | Peak Four | High | 0.00952 | 0.01824 | 3.19 | 117.29 |
|          |          |          |        |        |         | 137 | Redunc Heavy      | Peak Four | Peak Four | Peak Four | Peak Four | Peak Four | High      | High | 0.00952 | 0.08292 | 2.96 | 117.29 |
| 1084485  | 2831901  | 2575152  |        | 8489   | 9990    | 138 | Light             | Peak Four | High      | High      | Not Found | Peak Four | Peak Four | High | 0.00848 | 0.04802 | 3.27 | 66.18  |
| 54114    | 31231    | 44839    |        |        |         | 139 | Light             | Peak Four | Peak Four | High      | Not Found | Not Found | Not Found | High | 0.00952 | 0.05365 | 3.11 | 80.1   |
|          | 71446    |          |        | 6769   |         | 140 | Light             | Not Found | High      | Not Found | Not Found | Peak Four | Not Found | High | 0.00848 | 0.03872 | 2.6  | 84.53  |
| 496332   | 2892928  | 1675282  | 38296  | 355079 | 426217  | 141 | Heavy             | Peak Four | Peak Four | Peak Four | Peak Four | High      | Peak Four | High | 0.00848 | 0.105   | 2.86 | 67.5   |
| 124547   | 142655   | 187582   |        |        |         | 135 | Light             | Peak Four | High      | Peak Four | Not Found | Not Found | Not Found | High | 0.00848 | 0.05811 | 2.25 | 90.22  |
| 17528    | 22263    | 12186    |        |        |         | 75  | Light             | Peak Four | High      | Peak Four | Not Found | Not Found | Not Found | High | 0.00848 | 0.00688 | 5.94 | 188.82 |
| 276048   | 534891   | 288681   | 2429   | 17900  | 17205   | 128 | Light             | Peak Four | High      | Peak Four | Peak Four | Peak Four | Peak Four | High | 0.00848 | 0.0607  | 2.61 | 60.46  |
|          |          |          |        |        |         |     | Indistinguishable | Not Found | Not Found | Not Found | Not Found | Not Found | Not Found | High | 0.00848 | 0.0601  | 3.61 | 218.29 |
| 120815   | 66204    | 130982   |        |        |         | 113 | Light             | Peak Four | Peak Four | High      | Not Found | Not Found | Not Found | High | 0.00952 | 0.00767 | 4.39 | 70.18  |
| 123742   | 270542   | 102015   |        |        |         | 114 | Light             | Peak Four | High      | Peak Four | Not Found | Not Found | Not Found | High | 0.00848 | 0.02835 | 3.52 | 75.52  |
| 1514576  | 5341536  | 3621997  | 51866  | 803670 | 938390  | 115 | Heavy             | Peak Four | Peak Four | Peak Four | Peak Four | High      | Peak Four | High | 0.00848 | 0.08756 | 2.37 | 96.25  |
| 8413     | 56916    | 25943    |        | 5209   | 3707    | 116 | Light             | Peak Four | High      | Peak Four | Not Found | Peak Four | Peak Four | High | 0.00848 | 0.1172  | 2.33 | 65.78  |
| 655104   | 3071636  | 2076987  | 237862 | 654985 | 1053453 | 117 | Light             | Peak Four | High      | Peak Four | Peak Four | Peak Four | Peak Four | High | 0.00848 | 0.1315  | 2.7  | 83.03  |
|          |          |          |        |        |         | 117 | Redunc Heavy      | Peak Four | Peak Four | Peak Four | Peak Four | High      | High      | High | 0.00952 | 0.02565 | 2.93 | 83.03  |
| 76199    | 445707   | 281015   | 15207  | 58976  | 102566  | 118 | Heavy             | Peak Four | Peak Four | Peak Four | Peak Four | High      | High      | High | 0.00848 | 0.04301 | 2.42 | 194.79 |
| 88053    | 158979   | 176834   | 39676  | 98215  | 190031  | 127 | Light             | Peak Four | Peak Four | High      | Peak Four | Peak Four | Peak Four | High | 0.00952 | 0.04747 | 2.9  | 110.52 |
| 114330   | 94996    | 70068    | 26902  | 23966  |         | 119 | Light             | Peak Four | High      | Peak Four | Peak Four | Peak Four | Not Found | High | 0.00848 | 0.01138 | 3.71 | 164.12 |
| 1474205  | 798439   | 360974   |        |        |         | 121 | Light             | Peak Four | High      | Peak Four | Not Found | Not Found | Not Found | High | 0.00848 | 0.06278 | 2.84 | 151.03 |
| 215379   | 59012    | 55755    |        |        |         | 122 | Light             | Peak Four | Peak Four | High      | Not Found | Not Found | Not Found | High | 0.00952 | 0.2117  | 2.53 | 141.96 |
| 1367592  | 323791   | 156024   |        |        |         | 123 | Light             | Peak Four | Peak Four | High      | Not Found | Not Found | Not Found | High | 0.00952 | 0.02775 | 3.31 | 133.89 |
| 36639    | 55645    | 47278    | 13437  | 35804  | 69578   | 124 | Light             | Peak Four | Peak Four | High      | Peak Four | Peak Four | Peak Four | High | 0.00952 | 0.06081 | 3.6  | 67.59  |
| 36437    | 295974   | 169141   | 9972   | 52642  | 61163   | 125 | Light             | Peak Four | Peak Four | High      | Peak Four | Peak Four | Peak Four | High | 0.00952 | 0.0783  | 3.49 | 173.94 |
|          |          |          |        |        |         | 125 | Redunc Heavy      | Peak Four | Peak Four | Peak Four | Peak Four | Peak Four | High      | High | 0.00952 | 0.06998 | 3.52 | 173.94 |
| 79364512 | 50894856 | 40045632 |        |        |         | 126 | Light             | Peak Four | Peak Four | High      | Not Found | Not Found | Not Found | High | 0.00952 | 0.205   | 2.12 | 90.06  |
| 20445    | 27840    | 46228    | 26594  | 35496  | 93681   | 120 | Heavy             | Peak Four | Peak Four | Peak Four | Peak Four | Peak Four | High      | High | 0.00952 | 0.01166 | 3.74 | 157.03 |
| 31826    | 49445    | 8078     |        |        |         | 74  | Light             | Peak Four | High      | Peak Four | Not Found | Not Found | Not Found | High | 0.00848 | 0.04441 | 3    | 136.25 |
| 17230    | 19196    | 25511    | 18921  | 22770  | 68871   | 73  | Heavy             | Peak Four | Peak Four | Peak Four | Peak Four | Peak Four | High      | High | 0.00952 | 0.1859  | 2.47 | 121.23 |
| 19158    | 560671   | 62002    |        | 8175   | 2108    | 72  | Light             | Peak Four | High      | Peak Four | Not Found | Peak Four | Peak Four | High | 0.00848 | 0.02266 | 2.61 | 44.56  |
| 104171   | 114194   | 81868    |        |        |         | 20  | Light             | Peak Four | High      | Peak Four | Not Found | Not Found | Not Found | High | 0.00848 | 0.1448  | 7.33 | 122.27 |
| 66696    | 87612    | 42758    |        |        |         | 21  | Light             | Peak Four | High      | Peak Four | Not Found | Not Found | Not Found | High | 0.00848 | 0.00105 | 5.16 | 148.36 |

|          |          |          |        |         |         |     |              |                |                     |                |                |         |          |      |        |
|----------|----------|----------|--------|---------|---------|-----|--------------|----------------|---------------------|----------------|----------------|---------|----------|------|--------|
| 36359    | 245847   | 261209   |        | 31790   | 77521   | 22  | Light        | Peak Four High | Peak Four Not Found | Peak Four      | Peak Four High | 0.00848 | 0.02697  | 3.53 | 91.24  |
| 30968    | 302052   | 264670   | 11084  | 60205   | 117191  | 23  | Light        | Peak Four High | Peak Four           | Peak Four      | Peak Four High | 0.00848 | 0.09922  | 1.67 | 49.02  |
| 802084   | 4756666  | 2098210  | 210735 | 816298  | 754029  | 24  | Light        | Peak Four High | Peak Four           | Peak Four      | Peak Four High | 0.00848 | 0.09501  | 2.93 | 171.13 |
|          |          |          |        |         |         | 24  | Redunc Heavy | Peak Four      | Peak Four           | Peak Four High | Peak Four High | 0.00848 | 0.1107   | 2.96 | 171.13 |
| 31265    | 58874    | 40932    |        |         |         | 25  | Light        | Peak Four      | Peak Four           | High           | Not Found      | 0.00952 | 0.1631   | 2.95 | 57.95  |
| 38710    | 186511   | 32151    |        |         |         | 19  | Light        | Peak Four      | Peak Four           | High           | Not Found      | 0.00952 | 0.04876  | 3.45 | 127.19 |
| 28419    | 91845    | 65949    | 17068  | 42605   | 95946   | 26  | Heavy        | Peak Four      | Peak Four           | Peak Four      | Peak Four High | 0.00952 | 0.08718  | 3.24 | 162.18 |
| 54886    | 37316    | 24758    |        |         |         | 28  | Light        | Peak Four High | Peak Four           | Not Found      | Not Found      | 0.00848 | 0.08464  | 2.37 | 50.27  |
| 34101    | 7573     | 278643   |        |         |         | 29  | Light        | Peak Four      | Peak Four           | High           | Not Found      | 0.00952 | 2.56E-05 | 6.96 | 70.1   |
| 38512    | 45369    | 55279    |        |         |         | 30  | Light        | Peak Four High | High                | Not Found      | Not Found      | 0.00848 | 0.00621  | 4.31 | 143.88 |
| 618670   | 628580   | 589151   |        |         |         | 31  | Light        | Peak Four High | High                | Not Found      | Not Found      | 0.00952 | 0.02066  | 4.59 | 185.88 |
| 12793    | 12536    | 85046    |        |         | 3521    | 32  | Light        | Peak Four      | Peak Four           | High           | Not Found      | 0.00952 | 0.00204  | 5.36 | 54.28  |
| 51621    | 57045    | 232465   |        |         | 6738    | 33  | Light        | Peak Four      | Peak Four           | High           | Not Found      | 0.00952 | 2.53E-06 | 9.57 | 76.99  |
| 5561     | 8383     | 50286    |        |         |         | 34  | Light        | Peak Four      | Peak Four           | High           | Not Found      | 0.00952 | 0.01641  | 5.02 | 68.46  |
|          | 54943    | 66886    |        |         |         | 27  | Light        | Not Found      | High                | Peak Four      | Not Found      | 0.00848 | 0.02754  | 2.53 | 91.09  |
| 49605    | 69050    | 65340    |        |         |         | 35  | Light        | Peak Four High | Peak Four           | Not Found      | Not Found      | 0.00848 | 0.1078   | 1.73 | 62.66  |
| 156517   | 47855    | 39743    |        |         |         | 18  | Light        | Peak Four High | Peak Four           | Not Found      | Not Found      | 0.00848 | 0.0508   | 2.6  | 127.74 |
| 30425970 | 37655656 | 25032102 |        |         |         | 16  | Light        | Peak Four High | Peak Four           | Not Found      | Not Found      | 0.00848 | 0.01319  | 3.43 | 62.26  |
| 171962   | 81458    | 510343   |        |         |         | 1   | Light        | Peak Four High | Peak Four           | Not Found      | Not Found      | 0.00848 | 0.00018  | 6.68 | 68.21  |
| 42101    | 24173    | 54488    |        |         |         | 2   | Light        | Peak Four      | Peak Four           | High           | Not Found      | 0.00952 | 0.02031  | 4.85 | 58.71  |
| 1384357  | 9011246  | 4912568  | 240201 | 1455481 | 1656935 | 3   | NotUni Light | Peak Four High | High                | Peak Four      | Peak Four High | 0.00848 | 0.03141  | 2.53 | 122.19 |
| 14686726 | 16488444 | 9296027  |        |         |         | 4   | Light        | Peak Four High | High                | Not Found      | Not Found      | 0.00848 | 0.00143  | 5.51 | 113.06 |
| 18102221 | 19988990 | 5914890  |        | 14332   | 3743    | 5   | Light        | Peak Four High | High                | Not Found      | Peak Four      | 0.00848 | 0.0001   | 7.03 | 138.36 |
|          |          | 11111    |        | 19302   | 47367   | 6   | Heavy        | Not Found      | Not Found           | Peak Four      | Not Found      | 0.00952 | 0.03873  | 4.07 | 68.53  |
| 163264   | 58135    | 69210    |        |         |         | 7   | Light        | Peak Four High | Peak Four           | Not Found      | Not Found      | 0.00848 | 0.1219   | 2.68 | 169.71 |
| 65061    | 32586    |          |        |         |         | 17  | Light        | Peak Four High | Not Found           | Not Found      | Not Found      | 0.00848 | 0.04815  | 3.05 | 160.17 |
| 116825   | 242797   | 45185    |        |         |         | 8   | Light        | Peak Four High | Peak Four           | Not Found      | Not Found      | 0.00848 | 0.1388   | 2.97 | 79.4   |
| 108544   | 318130   | 302034   | 19869  | 101632  | 138674  | 10  | NotUni Light | Peak Four      | Peak Four           | High           | Peak Four      | 0.00952 | 0.00533  | 4.53 | 204.63 |
| 98637    | 637886   | 329370   | 39218  | 208327  | 196940  | 11  | NotUni Light | Peak Four High | Peak Four           | Peak Four      | Peak Four High | 0.00848 | 0.00821  | 4.95 | 178.17 |
|          |          |          |        |         |         | 11  | Redunc Heavy | Peak Four      | Peak Four           | Peak Four High | High           | 0.00848 | 0.00366  | 4.93 | 178.6  |
| 83123    | 879617   | 420934   | 25905  | 162170  | 191276  | 12  | Heavy        | Peak Four      | Peak Four           | Peak Four High | High           | 0.00848 | 0.03292  | 2.94 | 117.41 |
|          | 97033    | 65748    | 21220  | 167379  | 158533  | 13  | Heavy        | Not Found      | Peak Four           | Peak Four High | Peak Four High | 0.00848 | 0.05814  | 2.61 | 120.26 |
|          |          | 10377    | 46994  | 71935   | 138917  | 14  | Heavy        | Not Found      | Not Found           | Peak Four      | Peak Four High | 0.00952 | 0.05861  | 3.59 | 189.26 |
| 25770    | 92021    | 58700    | 10788  | 32148   | 52686   | 15  | NotUni Light | Peak Four      | Peak Four           | High           | Peak Four High | 0.00952 | 0.06776  | 3.17 | 13.2   |
| 126573   | 521283   | 272596   | 34002  | 105449  | 116103  | 9   | NotUni Heavy | Peak Four      | Peak Four           | Peak Four      | Peak Four High | 0.00952 | 0.02003  | 3.9  | 217.58 |
| 774311   | 1481763  | 843531   |        | 163640  | 139548  | 142 | Light        | Peak Four      | Peak Four           | High           | Not Found      | 0.00952 | 0.09816  | 3.53 | 85.99  |
| 110889   | 33330    | 103476   |        |         |         | 36  | Light        | Peak Four      | Peak Four           | High           | Not Found      | 0.00952 | 0.01759  | 3.56 | 67.46  |
| 20944    | 36168    | 239539   |        |         |         | 38  | Light        | Peak Four High | High                | Not Found      | Not Found      | 0.00952 | 7.09E-06 | 8.12 | 39.72  |
|          |          | 6718     | 39128  | 40173   | 110718  | 56  | Heavy        | Not Found      | Not Found           | Peak Four      | Peak Four High | 0.00952 | 0.01232  | 4.12 | 106.39 |
|          | 71996    | 91836    |        |         |         | 57  | NotUni Light | Not Found      | High                | Peak Four      | Not Found      | 0.00848 | 0.1011   | 2.37 | 13.19  |
| 188194   | 254523   | 97759    | 104987 | 146812  | 129452  | 58  | Light        | Peak Four High | High                | Peak Four      | Peak Four High | 0.00848 | 0.00301  | 4.83 | 209.61 |
| 77043    | 260738   | 120207   |        |         |         | 59  | Light        | Peak Four High | Peak Four           | Not Found      | Not Found      | 0.00848 | 0.0125   | 3.57 | 119.43 |

|         |         |         |        |         |         |                 |           |         |           |           |           |           |      |         |         |      |        |
|---------|---------|---------|--------|---------|---------|-----------------|-----------|---------|-----------|-----------|-----------|-----------|------|---------|---------|------|--------|
| 293029  | 478152  | 219842  |        |         |         | 60 NoQua Heavy  | Not Foun  | Not Fou | Not Foun  | Not Foun  | Not Foun  | High      | High | 0.00952 | 0.1605  | 3.11 |        |
| 49532   | 84463   | 68968   |        | 3592    |         | 61 Light        | Peak Four | High    | Peak Four | Not Foun  | Not Foun  | Not Foun  | High | 0.00848 | 0.04421 | 2.32 | 60.58  |
| 1341189 | 1269742 | 1354392 |        |         |         | 62 Light        | Peak Four | High    | Peak Four | Not Foun  | Peak Four | Not Foun  | High | 0.00848 | 0.08559 | 2.09 | 15.86  |
|         | 46208   | 129417  |        |         |         | 55 Light        | Peak Four | Peak Fo | High      | Not Foun  | Not Foun  | Not Foun  | High | 0.00952 | 0.00017 | 6.07 | 102.3  |
| 83746   | 37120   | 19576   | 27989  | 21571   | 16108   | 63 Light        | Not Foun  | High    | High      | Not Foun  | Not Foun  | Not Foun  | High | 0.00848 | 0.1061  | 2.46 | 15.28  |
| 1589770 | 9841646 | 3932073 | 459025 | 1601906 | 1443102 | 65 Light        | Peak Four | High    | Peak Four | Peak Four | Peak Four | Peak Four | High | 0.00848 | 0.04286 | 3.83 | 196.33 |
|         | 52890   | 35254   |        |         |         | 66 NotUni Light | Peak Four | High    | Peak Four | Peak Four | Peak Four | Peak Four | High | 0.00848 | 0.1035  | 2.22 | 136.72 |
| 64564   | 290559  | 106586  | 4021   | 41646   | 29222   | 67 Light        | Not Foun  | High    | Peak Four | Not Foun  | Not Foun  | Not Foun  | High | 0.00848 | 0.1012  | 2.56 | 200.96 |
| 8038655 | 8363166 | 3052815 |        |         |         | 68 NotUni Light | Peak Four | High    | Peak Four | Peak Four | Peak Four | Peak Four | High | 0.00848 | 0.05843 | 2.8  | 38.6   |
| 1915259 | 1063314 | 682683  |        | 5815    | 4165    | 69 Light        | Peak Four | High    | High      | Not Foun  | Not Foun  | Not Foun  | High | 0.00952 | 0.00253 | 5.06 | 169.02 |
|         | 18940   | 49519   | 148919 | 245081  | 109343  | 70 Light        | Peak Four | High    | High      | Not Foun  | Peak Four | Peak Four | High | 0.00952 | 0.00145 | 4.56 | 186.05 |
| 19878   | 29041   | 19930   | 38654  | 66363   | 99534   | 71 Heavy        | Not Foun  | Peak Fo | Peak Four | Peak Four | Peak Four | High      | High | 0.00952 | 0.119   | 2.48 | 166.96 |
| 30851   | 19387   | 39817   |        |         |         | 64 Heavy        | Peak Four | Peak Fo | Peak Four | Peak Four | High      | Peak Four | High | 0.00848 | 0.1019  | 2.2  | 140.91 |
| 110391  | 165200  | 58524   |        |         |         | 37 Light        | Peak Four | Peak Fo | High      | Not Foun  | Not Foun  | Not Foun  | High | 0.00952 | 0.1867  | 1.86 | 43.5   |
| 81624   | 83586   | 39108   |        |         |         | 54 Light        | Peak Four | High    | Peak Four | Not Foun  | Not Foun  | Not Foun  | High | 0.00848 | 0.01044 | 4.36 | 117.71 |
| 160739  | 174273  | 148369  |        |         |         | 52 Light        | Peak Four | High    | Peak Four | Not Foun  | Not Foun  | Not Foun  | High | 0.00848 | 0.1021  | 2.62 | 64.37  |
|         |         |         |        |         |         | 39 Light        | Peak Four | Peak Fo | High      | Not Foun  | Not Foun  | Not Foun  | High | 0.00952 | 0.05115 | 3.32 | 123.01 |
|         |         |         |        |         |         | 40 Redunc Light | Peak Four | Peak Fo | High      | Peak Four | Peak Four | Peak Four | High | 0.00952 | 0.1118  | 3.13 | 56.31  |
| 15265   | 284553  | 99611   | 14771  | 154705  | 117865  | 40 NotUni Heavy | Peak Four | Peak Fo | Peak Four | Peak Four | High      | Peak Four | High | 0.00848 | 0.04372 | 3.37 | 56.31  |
| 78036   | 98455   | 105385  |        |         |         | 41 Light        | Peak Four | High    | Peak Four | Not Foun  | Not Foun  | Not Foun  | High | 0.00848 | 0.04873 | 3.1  | 147.29 |
| 842416  | 2446858 | 2305143 | 111339 | 490877  | 986358  | 42 NotUni Light | Peak Four | Peak Fo | High      | Peak Four | Peak Four | Peak Four | High | 0.00952 | 0.00455 | 4.57 | 24.81  |
|         |         |         |        |         |         | 42 Redunc Heavy | Peak Four | Peak Fo | Peak Four | Peak Four | High      | High      | High | 0.00952 | 0.00679 | 4.34 | 24.81  |
| 308671  | 3070234 | 665761  | 124186 | 659664  | 332061  | 43 NotUni Light | Peak Four | High    | High      | Peak Four | Peak Four | Peak Four | High | 0.00952 | 0.00295 | 4.04 | 54.45  |
|         |         |         |        |         |         | 53 NoQua Heavy  | Not Foun  | Not Fou | Not Foun  | Not Foun  | Not Foun  | High      | High | 0.00952 | 0.08023 | 3.02 |        |
|         |         |         |        |         |         | 43 Redunc Heavy | Peak Four | Peak Fo | Peak Four | Peak Four | High      | High      | High | 0.00952 | 0.00586 | 4.57 | 54.45  |
| 77169   | 103999  | 74435   |        |         |         | 45 Light        | Peak Four | High    | Peak Four | Not Foun  | Not Foun  | Not Foun  | High | 0.00848 | 0.1047  | 3.45 | 141.5  |
| 6877    | 5432    | 46156   |        |         |         | 46 Light        | Peak Four | Peak Fo | High      | Not Foun  | Not Foun  | Not Foun  | High | 0.00952 | 0.00338 | 4.29 | 13.03  |
| 10382   | 23375   | 39580   |        |         |         | 47 Light        | Peak Four | Peak Fo | High      | Not Foun  | Not Foun  | Not Foun  | High | 0.00952 | 0.0616  | 3.15 | 160.83 |
| 36994   | 223582  | 81231   | 16055  | 40664   |         | 48 Heavy        | Peak Four | Peak Fo | Peak Four | Peak Four | High      | Not Foun  | High | 0.00848 | 0.1225  | 2.44 | 141.7  |
|         | 87705   | 43253   |        | 25951   | 35390   | 49 Light        | Not Foun  | Peak Fo | High      | Not Foun  | Peak Four | Peak Four | High | 0.00952 | 0.04611 | 3.75 | 59.35  |
| 46361   | 161972  | 166384  | 67495  | 270347  | 408771  | 50 Heavy        | Peak Four | Peak Fo | Peak Four | Peak Four | High      | Peak Four | High | 0.00848 | 0.00871 | 4.29 | 95.73  |
| 89404   | 122953  | 43471   |        | 5795    |         | 51 Light        | Peak Four | High    | Peak Four | Not Foun  | Peak Four | Not Foun  | High | 0.00848 | 0.02322 | 3.35 | 144.64 |
| 92260   | 46706   | 67433   |        |         |         | 44 Light        | Peak Four | Peak Fo | High      | Not Foun  | Not Foun  | Not Foun  | High | 0.00952 | 0.00482 | 5.01 | 64.82  |
| 2676664 | 2464041 | 1718845 |        |         |         | 143 Light       | Peak Four | High    | High      | Not Foun  | Not Foun  | Not Foun  | High | 0.00848 | 0.00025 | 6.38 | 116.09 |

**Supplemental Table 4.6.** Raw Proteome discoverer output from the three replicates of Condition F

| Checked | Confide | Sequence             | Modificati | Contamin | Quality PE | Quality q | Num | Num | Master Pr | Master Proteir           | Protein A Numb | Theo    | MHp      | Abundance | Abundance | Abundanc | Abundance |         |
|---------|---------|----------------------|------------|----------|------------|-----------|-----|-----|-----------|--------------------------|----------------|---------|----------|-----------|-----------|----------|-----------|---------|
| FALSE   | High    | AAFGGSSGRGSSSSGG     | TRUE       | 2.26E-05 | 0.00661    | 1         | 1   | 1   | P35908    | Keratin, type II P35908  | 1              | 2501.07 | 90327    |           |           | 57.98    | 216939    |         |
| FALSE   | High    | RDLLLLLELK           | TRUE       | 0.04313  | 0.00661    | 1         | 1   | 3   | cRAP117   | 000000 rLys-C cRAP117    | 1              | 1100.67 | 19354741 |           |           | 27.09    | 19495408  |         |
| FALSE   | High    | RDLLLLLEKR           | TRUE       | 0.23353  | 0.00661    | 1         | 1   | 1   | cRAP117   | 000000 rLys-C cRAP117    | 2              | 1256.77 | 230148   |           |           | 75.21    | 540757    |         |
| FALSE   | High    | RGDLPFVVR            | FALSE      | 0.0566   | 0.00661    | 1         | 1   | 2   | P35579    | Myosin-9 OS=F P35579     | 1              | 1155.66 | 286722   | 1591      |           | 7.12     | 286722    |         |
| FALSE   | High    | RKPDTIEVQQMKAQA      | FALSE      | 0.0014   | 0.00661    | 1         | 3   | 1   | P35241    | Radixin OS=Ho P35241; F  | 2              | 1899.02 | 167958   |           |           | 21.89    | 188099    |         |
| FALSE   | High    | RTPPAGVFYQGWSAT      | TRUE       | 0.00957  | 0.00661    | 1         | 1   | 1   | cRAP117   | 000000 rLys-C cRAP117    | 1              | 3239.62 | 283951   |           |           | 21.65    | 283951    |         |
| FALSE   | High    | RTPPAGVFYQGWSAT      | TRUE       | 0.00282  | 0.00661    | 1         | 1   | 2   | cRAP117   | 000000 rLys-C cRAP117    | 2              | 3610.81 | 298296   |           |           | 88.44    | 760327    |         |
| FALSE   | High    | QVNEVLK              | FALSE      | 0.06523  | 0.00661    | 1         | 1   | 1   | Q96RW7    | Hemicentin-1 (Q96RW7     | 0              | 829.478 | 134673   |           |           | 15.62    | 170787    |         |
| FALSE   | High    | RVTIMPK 2xLabel:13   | FALSE      | 0.2036   | 0.00661    | 1         | 5   | 1   | P84243    | Histone H3.3 C P84243; C | 1              | 856.548 | 256800   | 54841     |           | 39.3     | 28.76     | 256800  |
| FALSE   | High    | RVTIMPKDIQLAR        | FALSE      | 0.00369  | 0.00661    | 1         | 5   | 2   | P84243    | Histone H3.3 C P84243; C | 2              | 1540.9  | 343080   | 60507     |           | 72.02    | 66.26     | 726929  |
| FALSE   | High    | RVTIMPKC 1xOxidatic  | FALSE      | 0.01917  | 0.00661    | 1         | 5   | 1   | P84243    | Histone H3.3 C P84243; C | 2              | 1556.89 | 189925   | 26998     |           | 111.23   | 106.13    | 819422  |
| FALSE   | High    | SAHSIAQLQK           | FALSE      | 0.01025  | 0.00661    | 1         | 1   | 1   | Q9ULS5    | Transmembran Q9ULS5      | 0              | 1082.6  | 37576    |           |           | 15.27    | 31988     |         |
| FALSE   | High    | SCAAAGTE 2xCarbam    | TRUE       | 0.00022  | 0.00661    | 1         | 1   | 1   | cRAP112   | Trypsin OS=Su: cRAP112   | 0              | 1882.84 | 78370    |           |           | 46.08    | 58212     |         |
| FALSE   | High    | SCQAQPTT 1xCarbam    | TRUE       | 0.03596  | 0.00661    | 1         | 1   | 1   | cRAP016   | Kappa-casein (cRAP016    | 0              | 1250.56 | 35977    |           |           | 28.08    | 51518     |         |
| FALSE   | High    | SGFSSVSVSR           | FALSE      | 0.00812  | 0.00661    | 1         | 1   | 1   | P02538    | Keratin, type II P02538  | 0              | 1012.51 | 83772    |           |           | 76.58    | 72416     |         |
| FALSE   | High    | RVTIMPK 1xOxidatic   | FALSE      | 0.08194  | 0.00661    | 1         | 5   | 1   | P84243    | Histone H3.3 C P84243; C | 1              | 860.502 | 88404    | 12353     |           | 28.35    | 38.04     | 54905   |
| FALSE   | High    | QSPSYGRHGSGSGR       | FALSE      | 0.12715  | 0.00661    | 1         | 1   | 1   | Q86Y23    | Hornerin OS=F Q86Y23     | 1              | 1432.67 | 69959    |           |           | 59.6     | 17806     |         |
| FALSE   | High    | NTDGSTDYGILQINSR     | TRUE       | 0.00067  | 0.00661    | 1         | 1   | 2   | cRAP078   | Lysozyme C OS cRAP078    | 0              | 1753.84 | 115816   |           |           | 64.09    | 280897    |         |
| FALSE   | High    | NLCNIPCS 3xCarbam    | TRUE       | 0.01022  | 0.00661    | 1         | 1   | 1   | cRAP078   | Lysozyme C OS cRAP078    | 0              | 2508.19 | 107270   |           |           | 60.57    | 277131    |         |
| FALSE   | High    | LLLPGELA 1xLabel:13  | FALSE      | 0.24035  | 0.00661    | 1         | 15  | 1   | Q16778    | Histone H2B ty Q16778; i | 0              | 959.623 | 2628580  | 499077    |           | 46.88    | 41.84     | 3659916 |
| FALSE   | High    | IITHPNFNGNTLDNDIM    | TRUE       | 0.05624  | 0.00661    | 1         | 1   | 1   | cRAP112   | Trypsin OS=Su: cRAP112   | 0              | 2283.18 | 1493997  |           |           | 63.97    | 2710962   |         |
| FALSE   | High    | IITHPNFNC 1xOxidatic | TRUE       | 0.0665   | 0.00661    | 1         | 1   | 1   | cRAP112   | Trypsin OS=Su: cRAP112   | 0              | 2299.18 | 216072   |           |           | 31.53    | 216072    |         |
| FALSE   | High    | IMLKGDNI 1xLabel:13  | FALSE      | 0.01612  | 0.00661    | 1         | 1   | 1   | P62304    | Small nuclear r P62304   | 1              | 1751.97 | 65015    | 59293     |           | 66.89    | 85.66     | 108696  |
| FALSE   | High    | LSAKPAPPKPEPKPK      | FALSE      | 0.01974  | 0.00661    | 1         | 1   | 2   | P05204    | Non-histone cl P05204    | 0              | 1584.95 | 229786   | 29282     |           | 35.59    | 37.16     | 366336  |
| FALSE   | High    | LSAKPAPPKPEPRPK      | FALSE      | 0.10941  | 0.00661    | 1         | 1   | 1   | O00479    | High mobility ξ O00479   | 0              | 1612.95 | 110647   | 2511      |           | 34.71    | 7.85      | 110647  |
| FALSE   | High    | ISGLIYEETR           | FALSE      | 0.03027  | 0.00661    | 1         | 1   | 1   | P62805    | Histone H4 OS P62805     | 0              | 1180.62 | 127584   | 4177      |           | 33.95    | 71.52     | 127584  |
| FALSE   | High    | LTGKDVNFEPFQQL       | FALSE      | 0.13998  | 0.00661    | 1         | 1   | 1   | P62081    | 40S ribosomal P62081     | 1              | 1783.89 | 35458    | 61689     |           | 88.61    | 48.41     | 85417   |
| FALSE   | High    | MIAGQVLDINLAAEPK     | FALSE      | 0.00086  | 0.00661    | 1         | 1   | 1   | P07910    | Heterogeneou P07910      | 0              | 1682.91 | 33872    | 21166     |           | 47.17    | 77.55     | 47912   |
| FALSE   | High    | MPCTEDIYI 1xCarbam   | TRUE       | 0.02325  | 0.00661    | 1         | 1   | 1   | cRAP087   | Serum albumir cRAP087    | 0              | 1724.83 | 123567   | 16028     |           | 92.92    | 20.62     |         |
| FALSE   | High    | MREIVHIQ 1xCarbam    | FALSE      | 0.08679  | 0.00661    | 1         | 4   | 1   | Q13885    | Tubulin beta-2 Q13885; i | 1              | 2122.1  | 9810     |           |           |          | 117.98    |         |
| FALSE   | High    | MSRFKFD 1xOxidatic   | FALSE      | 0.11909  | 0.00661    | 1         | 1   | 1   | Q6P1N9    | Putative deoxy Q6P1N9    | 2              | 2323.2  |          |           |           |          |           |         |
| FALSE   | High    | MVFTSSAI 1xCarbam    | TRUE       | 1.16E-05 | 0.00661    | 1         | 1   | 7   | cRAP117   | 000000 rLys-C cRAP117    | 0              | 2691.24 | 9616511  |           |           | 42.67    | 11244193  |         |
| FALSE   | High    | MVFTSSAI 1xCarbam    | TRUE       | 1.41E-06 | 0.00661    | 1         | 1   | 6   | cRAP117   | 000000 rLys-C cRAP117    | 0              | 2707.23 | 195400   |           |           | 38.47    | 218311    |         |
| FALSE   | High    | NDYFSDFGVYSQISR      | TRUE       | 0.00096  | 0.00661    | 1         | 1   | 1   | cRAP117   | 000000 rLys-C cRAP117    | 0              | 1884.84 | 380230   |           |           | 24.58    | 389549    |         |
| FALSE   | High    | SGGGGGG 1xCarbam     | TRUE       | 4.87E-05 | 0.00661    | 1         | 1   | 2   | P13645    | Keratin, type I P13645   | 0              | 1549.68 | 56494    |           |           | 41.23    | 56494     |         |
| FALSE   | High    | LLLPGELA 1xLabel:13  | FALSE      | 0.25812  | 0.00661    | 1         | 15  | 1   | Q16778    | Histone H2B ty Q16778; i | 0              | 953.603 |          |           |           |          |           |         |
| FALSE   | High    | SGGGGGGGLGSGGSIF     | TRUE       | 2.11E-05 | 0.00661    | 1         | 1   | 1   | P35527    | Keratin, type I P35527   | 0              | 1232.6  | 195864   |           |           | 29.77    | 171159    |         |
| FALSE   | High    | SGYRSGGFSSGSAGII     | TRUE       | 0.21403  | 0.00661    | 1         | 1   | 1   | P04264    | Keratin, type II P04264  | 1              | 2121.01 | 27433    |           |           | 41.14    | 27433     |         |
| FALSE   | High    | VDWPSAVVEGGSSGS      | TRUE       | 0.03107  | 0.00661    | 1         | 1   | 1   | cRAP117   | 000000 rLys-C cRAP117    | 0              | 2864.41 | 395539   |           |           | 62.03    | 817605    |         |
| FALSE   | High    | VHKECCHC 3xCarbam    | TRUE       | 0.0355   | 0.00661    | 1         | 1   | 1   | cRAP087   | Serum albumir cRAP087    | 2              | 2612.17 | 160926   |           |           | 71.63    | 23429     |         |

|       |      |                                 |       |          |         |   |    |   |         |                                      |   |         |         |        |        |       |         |
|-------|------|---------------------------------|-------|----------|---------|---|----|---|---------|--------------------------------------|---|---------|---------|--------|--------|-------|---------|
| FALSE | High | VHPAVVIR                        | FALSE | 0.06957  | 0.00661 | 1 | 1  | 1 | P62829  | 60S ribosomal P62829                 | 0 | 890.557 | 195711  | 2400   | 31.9   |       | 225760  |
| FALSE | High | VLKQVHPDTGISSK                  | FALSE | 0.0781   | 0.00661 | 1 | 15 | 1 | Q16778  | Histone H2B t <sub>y</sub> Q16778; I | 1 | 1508.84 | 113065  | 20657  | 34.52  | 45.34 | 161059  |
| FALSE | High | VLPGVDALSNI                     | FALSE | 0.14172  | 0.00661 | 1 | 1  | 1 | P00558  | Phosphoglycer P00558                 | 0 | 1097.62 |         |        |        |       |         |
| FALSE | High | VTIAQGGVLPNIQAVL                | FALSE | 0.00224  | 0.00661 | 1 | 10 | 1 | Q16777  | Histone H2A t <sub>y</sub> Q16777; I | 0 | 1931.17 | 586752  | 218455 | 91.83  |       | 1528001 |
| FALSE | High | VASLRETY <sup>1</sup> 2xCarbam  | TRUE  | 0.00179  | 0.00661 | 1 | 1  | 1 | cRAP087 | Serum albumin cRAP087                | 1 | 2004.85 | 26384   |        | 30.91  |       |         |
| FALSE | High | VTIAQGGVLPNIQAVL                | FALSE | 0.07491  | 0.00661 | 1 | 10 | 1 | Q16777  | Histone H2A t <sub>y</sub> Q16777; I | 1 | 2059.26 | 23689   | 5230   | 121.25 | 74.42 | 183326  |
| FALSE | High | VTIMPKDIQLAR                    | FALSE | 0.02302  | 0.00661 | 1 | 5  | 2 | P84243  | Histone H3.3 C P84243; C             | 1 | 1384.8  | 314119  | 50397  | 32.16  | 18    | 314119  |
| FALSE | High | WWCNDG 1xCarbam                 | TRUE  | 0.23353  | 0.00661 | 1 | 1  | 1 | cRAP078 | Lysozyme C O <sub>5</sub> cRAP078    | 1 | 1491.65 | 235539  |        | 138.94 |       | 2123806 |
| FALSE | High | YALYDATY 1xLabel:13             | FALSE | 0.01433  | 0.00661 | 1 | 2  | 1 | P23528  | Cofilin-1 OS=H P23528; C             | 0 | 1343.65 | 53030   | 17608  | 93.53  | 88.38 | 191504  |
| FALSE | High | YEKDIAAYR                       | FALSE | 0.02027  | 0.00661 | 1 | 2  | 2 | P26583  | High mobility $\xi$ P26583; F        | 1 | 1128.57 | 1186020 |        | 36.49  |       | 1934749 |
| FALSE | High | YICDNQDT 1xCarbam               | TRUE  | 0.00111  | 0.00661 | 1 | 1  | 2 | cRAP087 | Serum albumin cRAP087                | 0 | 1443.64 | 1944094 |        | 91.54  |       | 137243  |
| FALSE | High | YRPGTVALR                       | FALSE | 0.0689   | 0.00661 | 1 | 5  | 1 | P84243  | Histone H3.3 C P84243; C             | 0 | 1032.59 | 545248  | 59615  | 44.28  | 46.32 | 545248  |
| FALSE | High | VTIAQGGVLPNIQAVL                | FALSE | 0.05221  | 0.00661 | 1 | 1  | 1 | Q16777  | Histone H2A t <sub>y</sub> Q16777    | 2 | 2641.54 | 20021   |        | 10.28  |       | 21533   |
| FALSE | High | TVTAMDVVYALKR                   | FALSE | 0.05272  | 0.00661 | 1 | 1  | 2 | P62805  | Histone H4 OS P62805                 | 1 | 1466.8  | 67519   | 13487  | 50.94  | 3.86  | 67519   |
| FALSE | High | TVTAMDVVYALK                    | FALSE | 0.07419  | 0.00661 | 1 | 1  | 1 | P62805  | Histone H4 OS P62805                 | 0 | 1310.7  | 51863   | 7787   | 55.53  | 52.62 | 66569   |
| FALSE | High | TVETRDGQVINETSQH                | FALSE | 0.03027  | 0.00661 | 1 | 1  | 1 | P08670  | Vimentin OS=I P08670                 | 1 | 2423.11 | 21354   |        | 111.53 |       | 103619  |
| FALSE | High | SLDLSIIAEVK                     | TRUE  | 0.00902  | 0.00661 | 1 | 1  | 1 | P04264  | Keratin, type II P04264              | 0 | 1302.72 | 61236   |        | 12.67  |       |         |
| FALSE | High | SLHTLFGD 1xCarbam               | TRUE  | 0.01154  | 0.00661 | 1 | 1  | 1 | cRAP087 | Serum albumin cRAP087                | 0 | 1419.69 | 86133   |        | 86.67  |       | 7245    |
| FALSE | High | SLNNQFASFIDK                    | TRUE  | 0.01994  | 0.00661 | 1 | 1  | 1 | P04264  | Keratin, type II P04264              | 0 | 1383.69 | 11170   | 3236   | 113.8  |       | 3675    |
| FALSE | High | SLVNLGGSK                       | TRUE  | 0.11114  | 0.00661 | 1 | 1  | 1 | P04264  | Keratin, type II P04264              | 0 | 874.499 | 1255966 |        | 69.43  |       | 3263988 |
| FALSE | High | SPAQILQWQVLSNTVF                | TRUE  | 0.04412  | 0.00661 | 1 | 1  | 2 | cRAP016 | Kappa-casein C cRAP016               | 0 | 1980.09 | 138589  |        | 51.58  |       | 260141  |
| FALSE | High | SQRAGLQFPVGR                    | FALSE | 0.16215  | 0.00661 | 1 | 2  | 1 | Q71UI9  | Histone H2A.V Q71UI9; F              | 1 | 1315.72 | 67667   | 12047  | 67.74  | 93.21 | 149714  |
| FALSE | High | SSLLEKGLDGAKK                   | FALSE | 0.01261  | 0.00661 | 1 | 1  | 2 | P81605  | Dermcidin OS= P81605                 | 2 | 1345.77 | 120338  |        | 80.49  |       | 417258  |
| FALSE | High | STITSREIQTAVR                   | FALSE | 0.14978  | 0.00661 | 1 | 13 | 1 | Q16778  | Histone H2B t <sub>y</sub> Q16778; I | 1 | 1461.8  | 996142  | 247516 | 98.45  | 98.51 | 3125733 |
| FALSE | High | TAENATSETLEENEA                 | FALSE | 0.02317  | 0.00661 | 1 | 1  | 1 | Q9UQ80  | Proliferation-a Q9UQ80               | 0 | 1837.76 |         |        |        |       |         |
| FALSE | High | TCVADES <sup>1</sup> 2xCarbam   | TRUE  | 0.03875  | 0.00661 | 1 | 1  | 1 | cRAP087 | Serum albumin cRAP087                | 0 | 1463.59 | 213007  |        | 90.65  |       | 15623   |
| FALSE | High | TIPSWATLSASQLAR                 | FALSE | 0.13158  | 0.00661 | 1 | 1  | 1 | Q5SSJ5  | Heterochroma Q5SSJ5                  | 0 | 1601.86 | 14927   |        | 71.9   |       | 27738   |
| FALSE | High | TPPAGVFYQGSATP                  | TRUE  | 0.01911  | 0.00661 | 1 | 1  | 1 | cRAP117 | 000000  rLys-C cRAP117               | 0 | 3083.52 | 41729   | 3255   | 111.8  |       | 261807  |
| FALSE | High | TPPAGVFYQGSATP                  | TRUE  | 0.07785  | 0.00661 | 1 | 1  | 1 | cRAP117 | 000000  rLys-C cRAP117               | 1 | 3454.7  | 357966  |        | 40.92  |       | 423658  |
| FALSE | High | TPPAGVFYQGSATP                  | TRUE  | 0.01655  | 0.00661 | 1 | 1  | 1 | cRAP117 | 000000  rLys-C cRAP117               | 2 | 3582.8  | 52753   |        | 56.35  |       | 104495  |
| FALSE | High | TTHFVEGGDAGNRED                 | FALSE | 0.08142  | 0.00661 | 1 | 1  | 1 | P18124  | 60S ribosomal P18124                 | 1 | 2115.98 | 19886   | 18779  | 58.06  | 31.01 | 41793   |
| FALSE | High | SGGGGGR 1xCarbam                | TRUE  | 5.78E-05 | 0.00661 | 1 | 1  | 2 | P04264  | Keratin, type II P04264              | 1 | 2293.98 | 104624  |        | 71.63  |       | 303554  |
| FALSE | High | LLDFGSL <sup>1</sup> 1xOxidatic | FALSE | 0.08326  | 0.00661 | 1 | 1  | 1 | P08708  | 40S ribosomal P08708                 | 1 | 2779.44 | 17897   | 18677  | 87.99  |       | 37082   |
| FALSE | High | LLDFGSL <sup>1</sup> 2xLabel:13 | FALSE | 0.0337   | 0.00661 | 1 | 1  | 2 | P08708  | 40S ribosomal P08708                 | 1 | 2775.49 | 27446   | 20406  | 48.44  | 27.82 | 39219   |
| FALSE | High | LLDFGSLSNLQVTQPT                | FALSE | 0.00917  | 0.00661 | 1 | 1  | 1 | P08708  | 40S ribosomal P08708                 | 1 | 2763.45 |         |        |        |       |         |
| FALSE | High | CCTKPESE <sup>1</sup> 3xCarbam  | TRUE  | 0.02317  | 0.00661 | 1 | 1  | 1 | cRAP087 | Serum albumin cRAP087                | 1 | 2872.31 | 44770   |        | 57.24  |       |         |
| FALSE | High | CELAAMI 1xCarbam                | TRUE  | 0.12715  | 0.00661 | 1 | 1  | 1 | cRAP078 | Lysozyme C O <sub>5</sub> cRAP078    | 1 | 1049.52 | 18947   |        | 80.49  |       | 60345   |
| FALSE | High | CNKEVYFA 1xCarbam               | FALSE | 0.06136  | 0.00661 | 1 | 1  | 1 | P50238  | Cysteine-rich p P50238               | 1 | 1315.61 | 308034  | 53080  | 103.13 | 74.47 | 1631005 |
| FALSE | High | CSQAVYA <sup>1</sup> 1xCarbam   | FALSE | 0.00057  | 0.00661 | 1 | 1  | 3 | P21291  | Cysteine and g P21291                | 1 | 1651.85 | 127791  | 3753   | 14.44  |       | 106430  |
| FALSE | High | DAEAWFNEK                       | TRUE  | 0.05221  | 0.00661 | 1 | 4  | 1 | P13645  | Keratin, type I Q723Y7; I            | 0 | 1109.49 | 16999   |        | 77.95  |       | 16999   |
| FALSE | High | DAFLGSFLYEYSR                   | TRUE  | 0.00778  | 0.00661 | 1 | 1  | 1 | cRAP087 | Serum albumin cRAP087                | 0 | 1567.74 | 120773  |        | 115.46 |       | 11408   |
| FALSE | High | AYDNATA <sup>1</sup> 1xCarbam   | TRUE  | 0.00069  | 0.00661 | 1 | 1  | 1 | cRAP117 | 000000  rLys-C cRAP117               | 1 | 3766.77 | 75734   |        | 48.5   |       | 108271  |



|       |      |                      |       |          |         |   |    |   |           |                          |   |         |          |        |        |       |          |
|-------|------|----------------------|-------|----------|---------|---|----|---|-----------|--------------------------|---|---------|----------|--------|--------|-------|----------|
| FALSE | High | DAVEDLESV GK         | FALSE | 0.04572  | 0.00661 | 1 | 1  | 1 | P81605    | Dermcidin OS= P81605     | 0 | 1161.56 | 23461    |        | 35.04  |       | 28206    |
| FALSE | High | DGFGASG( 2xCarbam    | TRUE  | 0.01158  | 0.00661 | 1 | 1  | 1 | cRAP117   | 000000 rLys-C cRAP117    | 1 | 3307.46 | 48774    |        | 32.28  |       | 48774    |
| FALSE | High | DGQVINETSQHHDDL I    | FALSE | 0.24592  | 0.00661 | 1 | 1  | 1 | P08670    | Vimentin OS= P08670      | 0 | 1836.8  |          |        |        |       |          |
| FALSE | High | DNIQGITKPAIR         | FALSE | 0.01196  | 0.00661 | 1 | 1  | 2 | P62805    | Histone H4 OS P62805     | 0 | 1325.75 | 63037    | 5408   | 40.09  | 35.37 | 69027    |
| FALSE | High | DNIQGITKPAIRR        | FALSE | 0.11045  | 0.00661 | 1 | 1  | 1 | P62805    | Histone H4 OS P62805     | 1 | 1481.85 | 97908    | 16729  | 37.91  | 25    | 97908    |
| FALSE | High | DTHKSEIAHR           | TRUE  | 0.06316  | 0.00661 | 1 | 1  | 1 | cRAP087   | Serum albumir cRAP087    | 1 | 1193.6  | 1041120  |        |        |       |          |
| FALSE | High | DTLLELK              | TRUE  | 0.05715  | 0.00661 | 1 | 1  | 1 | cRAP117   | 000000 rLys-C cRAP117    | 0 | 944.566 | 115357   | 4217   | 73.16  | 17.67 | 273393   |
| FALSE | High | DGFGASG( 2xCarbam    | TRUE  | 7.67E-05 | 0.00661 | 1 | 1  | 2 | cRAP117   | 000000 rLys-C cRAP117    | 0 | 2231.93 | 258828   |        | 70.97  |       | 578893   |
| FALSE | High | AYDNATAAVAK          | TRUE  | 0.02094  | 0.00661 | 1 | 1  | 2 | cRAP117   | 000000 rLys-C cRAP117    | 0 | 1094.55 | 18712346 |        | 49.64  |       | 28097283 |
| FALSE | High | AVFVDLEP 1xLabel:13  | FALSE | 0.01607  | 0.00661 | 1 | 3  | 2 | Q71U36    | Tubulin alpha- Q71U36;   | 0 | 1707.93 |          | 51091  |        | 50.38 |          |
| FALSE | High | AVFPSIVGRPR          | FALSE | 0.09671  | 0.00661 | 1 | 9  | 1 | A5A3E0    | POTE ankyrin c A5A3E0; I | 0 | 1198.71 | 58828    | 14641  | 76.17  | 81.55 | 162925   |
| FALSE | High | AAKPKTAKPKAAKPK      | FALSE | 0.21153  | 0.00661 | 1 | 1  | 1 | P10412    | Histone H1.4 C P10412    | 2 | 1534.98 | 24822    | 8623   | 69.27  |       | 58332    |
| FALSE | High | AEFVEVTK             | TRUE  | 0.04244  | 0.00661 | 1 | 1  | 1 | cRAP087   | Serum albumir cRAP087    | 0 | 922.488 | 224498   |        | 81.01  |       | 46166    |
| FALSE | High | AGFADPDDFTLGAGPF     | FALSE | 0.23829  | 0.00661 | 1 | 1  | 1 | Q6ZRV2    | Protein FAM83 Q6ZRV2     | 0 | 1606.75 | 71480    |        | 70.83  |       | 210441   |
| FALSE | High | AGFAGDD. 1xLabel:13  | FALSE | 0.01778  | 0.00661 | 1 | 10 | 1 | A5A3E0    | POTE ankyrin c A5A3E0; I | 0 | 982.468 | 494633   | 143575 | 65.49  | 66.81 | 1054583  |
| FALSE | High | AGFAGDDAPRAVFP SI    | FALSE | 0.16463  | 0.00661 | 1 | 9  | 1 | A5A3E0    | POTE ankyrin c A5A3E0; I | 1 | 2156.14 | 225754   | 41290  | 59.16  | 52.65 | 443238   |
| FALSE | High | AGLQFPVGR            | FALSE | 0.06057  | 0.00661 | 2 | 15 | 1 | Q16777; C | Histone H2A ty Q16777; t | 0 | 944.531 | 2123992  | 430367 | 29.28  | 23.61 | 2123992  |
| FALSE | High | AGLQFPVC 1xLabel:13  | FALSE | 0.05884  | 0.00661 | 2 | 15 | 1 | Q16777; C | Histone H2A ty Q16777; t | 0 | 950.551 |          |        |        |       |          |
| FALSE | High | AGLQFPVGRVHR         | FALSE | 0.11578  | 0.00661 | 1 | 12 | 1 | Q16777    | Histone H2A ty Q16777; t | 1 | 1336.76 | 273415   | 56510  | 76.38  | 74.29 | 670676   |
| FALSE | High | AGYRDGF( 2xCarbam    | TRUE  | 0.0001   | 0.00661 | 1 | 1  | 5 | cRAP117   | 000000 rLys-C cRAP117    | 1 | 2679.15 | 6080934  |        | 30.58  |       | 7750479  |
| FALSE | High | AGYRDGF( 2xCarbam    | TRUE  | 1.81E-05 | 0.00661 | 1 | 1  | 4 | cRAP117   | 000000 rLys-C cRAP117    | 2 | 3754.68 | 5086647  | 4136   | 38.41  |       | 6551620  |
| FALSE | High | ALKAWSVAR            | TRUE  | 0.21466  | 0.00661 | 1 | 1  | 1 | cRAP087   | Serum albumir cRAP087    | 1 | 1001.59 | 725413   |        | 70.69  |       | 99009    |
| FALSE | High | AMGIMNSFVNDIFER      | FALSE | 0.06136  | 0.00661 | 1 | 14 | 1 | Q16778    | Histone H2B ty Q16778; t | 0 | 1743.82 | 86303    | 22213  | 72.08  | 57.01 | 206389   |
| FALSE | High | AMGIMNS 1xLabel:13   | FALSE | 0.14886  | 0.00661 | 1 | 14 | 1 | Q16778    | Histone H2B ty Q16778; t | 0 | 1749.84 |          |        |        |       |          |
| FALSE | High | AMGIMNS 1xOxidatic   | FALSE | 0.00637  | 0.00661 | 1 | 14 | 2 | Q16778    | Histone H2B ty Q16778; t | 0 | 1759.81 | 231113   | 100424 | 86.79  |       | 376023   |
| FALSE | High | ASGQAFEL 1xLabel:13  | FALSE | 0.2048   | 0.00661 | 1 | 1  | 1 | P16949    | Stathmin OS= P16949      | 0 | 1394.77 |          | 27107  |        | 44.08 |          |
| FALSE | High | EIQTAVRLLLP GELAK    | FALSE | 0.00192  | 0.00661 | 1 | 14 | 2 | Q16778    | Histone H2B ty Q16778; t | 1 | 1751.04 | 1289803  | 290166 | 73.39  | 63.96 | 2747081  |
| FALSE | High | EIQTAVRLI 2xLabel:13 | FALSE | 0.01688  | 0.00661 | 1 | 14 | 3 | Q16778    | Histone H2B ty Q16778; t | 1 | 1763.08 |          |        |        |       |          |
| FALSE | High | FESNFNTQATNR         | TRUE  | 0.00556  | 0.00661 | 1 | 1  | 2 | cRAP078   | Lysozyme C OS cRAP078    | 0 | 1428.65 | 147556   |        | 113.01 |       | 731085   |
| FALSE | High | FESNFNTQATNRNTDC     | TRUE  | 0.03189  | 0.00661 | 1 | 1  | 1 | cRAP078   | Lysozyme C OS cRAP078    | 1 | 3163.47 | 25765    |        | 76.86  |       | 47376    |
| FALSE | High | HIATNAVLF FGR        | TRUE  | 0.14841  | 0.00661 | 1 | 1  | 1 | cRAP086   | Ovalbumin OS: cRAP086    | 0 | 1345.74 | 10491    | 1570   | 109.26 | 4.72  | 58040    |
| FALSE | High | KVHGSLAR             | FALSE | 0.18962  | 0.00661 | 1 | 1  | 1 | P62861    | 40S ribosomal P62861     | 1 | 867.516 | 50922    | 70158  | 41.46  | 43.4  | 25991    |
| FALSE | High | KVPQVSTPTLVEVSR      | TRUE  | 0.00429  | 0.00661 | 1 | 2  | 1 | cRAP087   | Serum albumir cRAP087;   | 1 | 1639.94 | 735675   |        | 99.19  |       | 94480    |
| FALSE | High | KYSQGNVSAVGVTYDC     | TRUE  | 0.00018  | 0.00661 | 1 | 1  | 1 | cRAP117   | 000000 rLys-C cRAP117    | 1 | 2324.16 | 455605   |        | 108.51 |       | 2254218  |
| FALSE | High | LAPDYDALDVANKIGII    | FALSE | 0.04528  | 0.00661 | 1 | 1  | 1 | P62750    | 60S ribosomal P62750     | 1 | 1800.97 | 28014    | 37106  | 65.65  | 25.01 | 55724    |
| FALSE | High | LFIGGLSFETTEESLR     | FALSE | 0.04055  | 0.00661 | 1 | 1  | 1 | P22626    | Heterogeneous P22626     | 0 | 1798.92 |          |        |        |       |          |
| FALSE | High | LFTFHADK 1xCarbam    | TRUE  | 0.09764  | 0.00661 | 1 | 1  | 1 | cRAP087   | Serum albumir cRAP087    | 0 | 1907.92 | 67701    |        | 70.2   |       |          |
| FALSE | High | LGEHNIDVLEGN EQFI I  | TRUE  | 1.05E-05 | 0.00661 | 1 | 1  | 2 | cRAP112   | Trypsin OS=Su: cRAP112   | 0 | 2211.1  | 4547298  |        | 44.76  |       | 4877349  |
| FALSE | High | LGEYGFQNALIVR        | TRUE  | 0.03097  | 0.00661 | 1 | 1  | 1 | cRAP087   | Serum albumir cRAP087    | 0 | 1479.8  | 452717   |        | 95.43  |       | 62108    |
| FALSE | High | LGGSAVISLEGKPL       | FALSE | 0.02564  | 0.00661 | 1 | 1  | 1 | P23528    | Cofilin-1 OS=H P23528    | 0 | 1340.78 | 96772    | 30148  | 74.5   | 69.14 | 170102   |
| FALSE | High | LGGSAVISI 1xLabel:13 | FALSE | 0.03425  | 0.00661 | 1 | 1  | 1 | P23528    | Cofilin-1 OS=H P23528    | 0 | 1346.8  |          |        |        |       |          |
| FALSE | High | IGLGRRGGSGSYGR       | TRUE  | 0.18737  | 0.00661 | 1 | 1  | 1 | P35527    | Keratin, type I P35527   | 1 | 1350.69 | 576744   |        | 48.54  |       | 1073380  |

|       |      |                     |       |          |         |   |    |   |         |                           |   |         |         |        |       |        |         |
|-------|------|---------------------|-------|----------|---------|---|----|---|---------|---------------------------|---|---------|---------|--------|-------|--------|---------|
| FALSE | High | IHRHLK              | FALSE | 0.21718  | 0.00661 | 1 | 2  | 1 | Q71UI9  | Histone H2A.V Q71UI9; F   | 1 | 803.5   | 70028   | 2681   | 24.64 | 25.63  | 52997   |
| FALSE | High | LKECCDKP 2xCarbam   | TRUE  | 0.00379  | 0.00661 | 1 | 1  | 2 | cRAP087 | Serum albumin cRAP087     | 1 | 1532.78 | 1762565 | 2991   | 71.91 | 32.44  | 303397  |
| FALSE | High | LLCGLLAEf 1xCarbam  | FALSE | 0.04016  | 0.00661 | 1 | 1  | 1 | P14174  | Macrophage r P14174       | 0 | 1050.61 | 5395    | 15754  | 106   | 112.39 | 25286   |
| FALSE | High | HGSLGLGHSSSHGQHG    | FALSE | 0.06195  | 0.00661 | 1 | 1  | 1 | Q86YZ3  | Hornerin OS= F Q86YZ3     | 0 | 1885.84 | 27240   |        | 16.08 |        | 21980   |
| FALSE | High | YRPGTVALREIRR       | FALSE | 0.24663  | 0.00661 | 1 | 5  | 1 | P84243  | Histone H3.3 C P84243; C  | 2 | 1586.92 | 68552   | 7353   | 64.77 |        | 98593   |
| FALSE | High | HGLDNYRf 1xCarbam   | TRUE  | 0.02157  | 0.00661 | 1 | 1  | 1 | cRAP078 | Lysozyme C O f cRAP078    | 1 | 2181.03 |         |        |       |        |         |
| FALSE | High | HAVSEGTK 3xLabel:13 | FALSE | 0.01452  | 0.00661 | 1 | 12 | 1 | Q16778  | Histone H2B ty Q16778; i  | 2 | 1812    |         |        |       |        |         |
| FALSE | High | FKDLGEEHFK          | TRUE  | 0.00109  | 0.00661 | 1 | 1  | 1 | cRAP087 | Serum albumin cRAP087     | 1 | 1249.62 | 103708  |        | 94.32 |        | 12790   |
| FALSE | High | FSSCGGGC 1xCarbam   | TRUE  | 0.00011  | 0.00661 | 1 | 1  | 2 | P04264  | Keratin, type II P04264   | 0 | 1765.73 | 61827   |        | 48.84 |        | 133002  |
| FALSE | High | FVNVVPTFGK          | FALSE | 0.24875  | 0.00661 | 1 | 1  | 1 | P62861  | 40S ribosomal P62861      | 0 | 1107.62 | 43192   | 27981  | 36.32 | 22.31  | 49033   |
| FALSE | High | GAVHDVKDVLDSVL      | FALSE | 0.04677  | 0.00661 | 1 | 1  | 1 | P81605  | Dermcidin OS= P81605      | 1 | 1466.78 |         |        |       |        |         |
| FALSE | High | GFGRGAESHTFK        | FALSE | 0.03199  | 0.00661 | 1 | 1  | 1 | P50238  | Cysteine-rich p P50238    | 1 | 1350.65 | 25320   | 8542   | 58.16 | 53.55  | 63370   |
| FALSE | High | GGLYGGP f 1xCarbam  | TRUE  | 0.00014  | 0.00661 | 1 | 1  | 3 | cRAP117 | 000000  rLys-C cRAP117    | 0 | 1727.78 | 333247  |        | 92.3  |        | 1153182 |
| FALSE | High | GGLYGGP f 1xCarbam  | TRUE  | 0.00325  | 0.00661 | 1 | 1  | 2 | cRAP117 | 000000  rLys-C cRAP117    | 1 | 3593.6  | 1304975 |        | 93.39 |        | 3908541 |
| FALSE | High | GGSGGSYGGGGSGGC     | TRUE  | 2.25E-06 | 0.00661 | 1 | 1  | 2 | P35527  | Keratin, type I P35527    | 0 | 1791.73 | 50267   |        | 28.88 |        | 37378   |
| FALSE | High | GSCGIGGC 1xCarbam   | FALSE | 0.01299  | 0.00661 | 1 | 2  | 1 | P02533  | Keratin, type I P02533; F | 0 | 1278.59 | 130392  |        | 49.93 |        | 82394   |
| FALSE | High | GSLGGGFSSGGFSGGS    | TRUE  | 7.25E-05 | 0.00661 | 1 | 1  | 1 | P13645  | Keratin, type I P13645    | 0 | 1707.77 | 141630  |        | 13.94 |        | 141630  |
| FALSE | High | GTDVQAWIR           | TRUE  | 0.0337   | 0.00661 | 1 | 1  | 1 | cRAP078 | Lysozyme C O f cRAP078    | 0 | 1045.54 | 72458   |        | 56.51 |        | 168232  |
| FALSE | High | GTGASGSFKLNK        | FALSE | 0.08247  | 0.00661 | 1 | 5  | 1 | P10412  | Histone H1.4 C P16401; F  | 1 | 1166.62 | 84374   | 50139  | 80.95 | 75.26  | 209229  |
| FALSE | High | GTGASGSF 2xLabel:13 | FALSE | 0.0665   | 0.00661 | 1 | 5  | 2 | P10412  | Histone H1.4 C P16401; F  | 1 | 1178.66 |         |        |       |        |         |
| FALSE | High | GTGASGSF 3xLabel:13 | FALSE | 0.19943  | 0.00661 | 1 | 5  | 1 | P10412  | Histone H1.4 C P16401; F  | 2 | 1312.77 | 185626  | 123750 | 52.35 | 45.88  | 196212  |
| FALSE | High | HAVSEGTKAVTKYTSSI   | FALSE | 0.00073  | 0.00661 | 1 | 12 | 6 | Q16778  | Histone H2B ty Q16778; i  | 2 | 1793.94 | 1321874 | 226060 | 49.99 | 58.83  | 1594055 |
| FALSE | High | HGGGGGGFGGGGFG f    | TRUE  | 0.00423  | 0.00661 | 1 | 1  | 1 | P35908  | Keratin, type II P35908   | 0 | 1320.58 | 33923   |        | 38.05 |        | 57508   |
| FALSE | High | YSQGNVSAVGVTYDG     | TRUE  | 0.00019  | 0.00661 | 1 | 1  | 3 | cRAP117 | 000000  rLys-C cRAP117    | 0 | 2196.07 | 1549846 |        | 64.38 |        | 2795056 |

| Abundance F | Abundance F | Abundan | Abundan | Abundan | Precur    | Quan               | Char      | Found in S | Found in S | Found in S | Found in S | Found in S | Found in S | Confide | Percolator | Percolator | XCorr by S | Top Apex | RT in r |
|-------------|-------------|---------|---------|---------|-----------|--------------------|-----------|------------|------------|------------|------------|------------|------------|---------|------------|------------|------------|----------|---------|
| 90327       | 82748       |         |         |         | 1         | Light              | High      | Peak Foun  | Peak Foun  | Not Found  | Not Found  | Not Found  | Not Found  | High    | 0.00952    | 0.00022    | 7.51       |          | 67.25   |
| 11544733    | 19354741    |         |         |         | 86        | Light              | High      | Peak Foun  | Peak Foun  | Not Found  | Not Found  | Not Found  | Not Found  | High    | 0.00952    | 0.06392    | 3.14       |          | 122.18  |
| 230148      | 112179      |         |         |         | 87        | Light              | High      | Peak Foun  | Peak Foun  | Not Found  | Not Found  | Not Found  | Not Found  | High    | 0.00952    | 0.2299     | 2.15       |          | 101.71  |
| 293430      | 256193      |         | 1591    |         | 88        | Light              | High      | High       | Peak Foun  | Not Found  | Peak Foun  | Not Found  | Not Found  | High    | 0.00952    | 0.07847    | 2.78       |          | 121.72  |
| 167958      | 120407      |         |         |         | 89        | Light              | Peak Foun | High       | Peak Foun  | Not Found  | Not Found  | Not Found  | Not Found  | High    | 0.00926    | 0.00434    | 2.79       |          | 59.35   |
| 365444      | 238983      |         |         |         | 90        | Light              | Peak Foun | High       | Peak Foun  | Not Found  | Not Found  | Not Found  | Not Found  | High    | 0.00926    | 0.01887    | 2.54       |          | 138.35  |
| 298296      | 96198       |         |         |         | 91        | Light              | Peak Foun | High       | Peak Foun  | Not Found  | Not Found  | Not Found  | Not Found  | High    | 0.00926    | 0.00741    | 4.5        |          | 130.18  |
| 129109      | 134673      |         |         |         | 85        | Light              | Peak Foun | High       | Peak Foun  | Not Found  | Not Found  | Not Found  | Not Found  | High    | 0.00926    | 0.08222    | 1.91       |          | 56.6    |
| 323144      | 137613      | 54841   | 61461   | 33882   | 92        | Heavy              | Peak Foun | Peak Foun  | Peak Foun  | Peak Foun  | High       | Peak Foun  | Peak Foun  | High    | 0.00926    | 0.1976     | 2.46       |          | 54.89   |
| 343080      | 151174      | 138606  | 60507   | 38711   | 94        | Light              | High      | High       | Peak Foun  | Peak Foun  | Peak Foun  | Peak Foun  | Peak Foun  | High    | 0.00926    | 0.00909    | 3.12       |          | 107.93  |
| 189925      | 73261       | 118682  | 26998   | 14819   | 95        | Light              | Peak Foun | High       | Peak Foun  | Peak Foun  | Peak Foun  | Peak Foun  | Peak Foun  | High    | 0.00926    | 0.03213    | 2.91       |          | 92.11   |
| 43494       | 37576       |         |         |         | 96        | Light              | Peak Foun | High       | Peak Foun  | Not Found  | Not Found  | Not Found  | Not Found  | High    | 0.00926    | 0.01986    | 3.74       |          | 47.78   |
| 139682      | 78370       |         |         |         | 97        | Light              | High      | Peak Foun  | Peak Foun  | Not Found  | Not Found  | Not Found  | Not Found  | High    | 0.00952    | 0.00119    | 5.51       |          | 142.49  |
| 35977       | 30221       |         |         |         | 98        | Light              | High      | Peak Foun  | Peak Foun  | Not Found  | Not Found  | Not Found  | Not Found  | High    | 0.00952    | 0.05569    | 3.37       |          | 48.74   |
| 263304      | 83772       |         |         |         | 99        | Light              | Peak Foun | High       | Peak Foun  | Not Found  | Not Found  | Not Found  | Not Found  | High    | 0.00926    | 0.01663    | 3.74       |          | 80.46   |
| 98614       | 88404       | 6173    | 13990   | 12353   | 93        | Light              | Peak Foun | High       | Peak Foun  | Peak Foun  | Peak Foun  | Peak Foun  | Peak Foun  | High    | 0.00926    | 0.09784    | 1.59       |          | 33.54   |
| 69959       | 79624       |         |         |         | 84        | Light              | Peak Foun | High       | Peak Foun  | Not Found  | Not Found  | Not Found  | Not Found  | High    | 0.00926    | 0.1372     | 1.33       |          | 16.26   |
| 115816      | 89271       |         |         |         | 83        | Light              | High      | Peak Foun  | Peak Foun  | Not Found  | Not Found  | Not Found  | Not Found  | High    | 0.00952    | 0.00278    | 6.16       |          | 138.6   |
| 104841      | 107270      |         |         |         | 82        | Light              | High      | Peak Foun  | Peak Foun  | Not Found  | Not Found  | Not Found  | Not Found  | High    | 0.00952    | 0.02161    | 5.73       |          | 179.76  |
| 2628580     | 1295866     | 763062  | 499077  | 323659  | 68        | Heavy              | Peak Foun | Peak Foun  | Peak Foun  | High       | Peak Foun  | Peak Foun  | Peak Foun  | High    | 0.00952    | 0.2352     | 2.21       |          | 135.64  |
| 1493997     | 651313      |         |         |         | 69        | Light              | Peak Foun | High       | Peak Foun  | Not Found  | Not Found  | Not Found  | Not Found  | High    | 0.00926    | 0.07329    | 3.82       |          | 167.83  |
| 272338      | 140574      |         |         |         | 70        | Light              | High      | Peak Foun  | Peak Foun  | Not Found  | Not Found  | Not Found  | Not Found  | High    | 0.00952    | 0.08852    | 3.63       |          | 159.66  |
| 38888       |             | 156966  | 59293   | 24403   | 71        | Heavy              | Peak Foun | Peak Foun  | Not Found  | High       | Peak Foun  | Peak Foun  | Peak Foun  | High    | 0.00952    | 0.03042    | 3.18       |          | 165.63  |
| 229786      | 188484      | 42715   | 20042   | 29282   | 72        | Light              | High      | High       | Peak Foun  | Peak Foun  | Peak Foun  | Peak Foun  | Peak Foun  | High    | 0.00926    | 0.03282    | 3.19       |          | 40.4    |
| 150492      | 73141       | 2511    | 2405    | 2795    | 73        | Light              | Peak Foun | High       | Peak Foun  | Peak Foun  | Peak Foun  | Peak Foun  | Peak Foun  | High    | 0.00926    | 0.1222     | 2.92       |          | 43.58   |
| 203051      | 109114      | 10841   | 4177    | 2888    | 74        | Light              | High      | Peak Foun  | Peak Foun  | Peak Foun  | Peak Foun  | Peak Foun  | Peak Foun  | High    | 0.00952    | 0.04897    | 3.48       |          | 113.96  |
| 35458       | 9607        | 88128   | 43182   |         | 75        | Light              | Peak Foun | High       | Peak Foun  | Peak Foun  | Peak Foun  | Peak Foun  | Not Found  | High    | 0.00926    | 0.1477     | 2.95       |          | 206.5   |
| 23946       |             | 35616   | 21166   | 4148    | 76        | Light              | High      | Peak Foun  | Not Found  | Peak Foun  | Peak Foun  | Peak Foun  | Peak Foun  | High    | 0.00952    | 0.00336    | 5.33       |          | 171.17  |
| 56218       | 271603      |         | 13839   | 18562   | 77        | Light              | Not Found | High       | Peak Foun  | Not Found  | Not Found  | Peak Foun  | Peak Foun  | High    | 0.00926    | 0.03724    | 3.58       |          | 205.92  |
|             |             | 58902   | 9810    | 6174    | 78        | Heavy              | Not Found | Not Found  | Not Found  | High       | Peak Foun  | Peak Foun  | Peak Foun  | High    | 0.00952    | 0.1083     | 3.35       |          | 90.71   |
|             |             |         |         |         |           | InconsistentlyLabr |           | Not Found  | Not Found  | Not Found  | Not Found  | Not Found  | Not Found  | High    | 0.00926    | 0.1303     | 1.69       |          | 81.18   |
| 9616511     | 4375277     |         |         |         | 79        | Light              | High      | High       | Peak Foun  | Not Found  | Not Found  | Not Found  | Not Found  | High    | 0.00926    | 0.00011    | 6.8        |          | 166.35  |
| 195400      | 95508       |         |         |         | 80        | Light              | High      | High       | Peak Foun  | Not Found  | Not Found  | Not Found  | Not Found  | High    | 0.00926    | 2.19E-05   | 7.52       |          | 155.31  |
| 380230      | 241612      |         |         |         | 81        | Light              | Peak Foun | High       | Peak Foun  | Not Found  | Not Found  | Not Found  | Not Found  | High    | 0.00926    | 0.00323    | 3.93       |          | 188.7   |
| 89645       | 39479       |         |         |         | 100       | Light              | High      | High       | Peak Foun  | Not Found  | Not Found  | Not Found  | Not Found  | High    | 0.00926    | 0.00033    | 5.54       |          | 56.21   |
|             |             |         |         |         | 68 Redunc | Light              | High      | Peak Foun  | Peak Foun  | Peak Foun  | Peak Foun  | Peak Foun  | Peak Foun  | High    | 0.00952    | 0.2486     | 1.92       |          | 135.64  |
| 295338      | 195864      |         |         |         | 101       | Light              | Peak Foun | High       | Peak Foun  | Not Found  | Not Found  | Not Found  | Not Found  | High    | 0.00926    | 0.00017    | 4.51       |          | 56.55   |
| 47041       | 21890       |         |         |         | 103       | Light              | Peak Foun | High       | Peak Foun  | Not Found  | Not Found  | Not Found  | Not Found  | High    | 0.00926    | 0.2055     | 2.66       |          | 110.22  |
| 395539      | 237462      |         |         |         | 122       | Light              | High      | Peak Foun  | Peak Foun  | Not Found  | Not Found  | Not Found  | Not Found  | High    | 0.00952    | 0.04993    | 4.28       |          | 202.33  |
| 160926      | 193108      |         |         |         | 123       | Light              | Peak Foun | High       | Peak Foun  | Not Found  | Not Found  | Not Found  | Not Found  | High    | 0.00926    | 0.05149    | 3.02       |          | 83.68   |

|         |         |        |        |        |     |        |                   |           |           |           |           |           |           |         |         |         |        |        |
|---------|---------|--------|--------|--------|-----|--------|-------------------|-----------|-----------|-----------|-----------|-----------|-----------|---------|---------|---------|--------|--------|
| 195711  | 115351  |        | 2400   |        | 124 | Light  | Peak Foun         | High      | Peak Foun | Not Found | Peak Foun | Not Found | High      | 0.00926 | 0.08638 | 2.62    | 59.33  |        |
| 113065  | 80014   | 38181  | 20657  | 16732  | 125 | Light  | High              | Peak Foun | Peak Foun | Peak Foun | Peak Foun | Peak Foun | High      | 0.00952 | 0.09993 | 3.08    | 55.31  |        |
|         |         |        |        |        |     |        | Indistinguishable | C         | Not Found | Not Found | Not Found | Not Found | Not Found | High    | 0.00952 | 0.1569  | 2.83   | 190.6  |
| 586752  | 164949  | 218455 |        |        | 126 | Light  | High              | Peak Foun | Peak Foun | Peak Foun | Not Found | Not Found | High      | 0.00952 | 0.00689 | 5.2     | 206.33 |        |
| 21128   | 32947   |        |        |        | 121 | Light  | Not Found         | High      | Peak Foun | Not Found | Not Found | Not Found | High      | 0.00926 | 0.00524 | 3.65    | 100.94 |        |
| 23689   | 22137   | 9387   | 2914   |        | 127 | Light  | Peak Foun         | High      | Peak Foun | Peak Foun | Peak Foun | Not Found | High      | 0.00926 | 0.09124 | 1.57    | 183.32 |        |
| 333377  | 172406  | 50397  | 54719  | 38151  | 129 | Light  | High              | High      | Peak Foun | Peak Foun | Peak Foun | Peak Foun | High      | 0.00926 | 0.03694 | 2.39    | 122.82 |        |
| 235539  | 90164   |        |        |        | 130 | Light  | High              | Peak Foun | Peak Foun | Not Found | Not Found | Not Found | High      | 0.00952 | 0.23    | 2.22    | 84.17  |        |
| 53030   | 32680   | 64423  | 17608  | 13738  | 131 | Heavy  | Peak Foun         | Peak Foun | Peak Foun | High      | Peak Foun | Peak Foun | High      | 0.00952 | 0.02786 | 3.49    | 116.09 |        |
| 1186020 | 987063  |        |        |        | 132 | Light  | Peak Foun         | High      | Peak Foun | Not Found | Not Found | Not Found | High      | 0.00926 | 0.03352 | 2.77    | 64.97  |        |
| 1944094 | 3608354 |        |        |        | 133 | Light  | Peak Foun         | High      | Peak Foun | Not Found | Not Found | Not Found | High      | 0.00926 | 0.00362 | 3.96    | 72.15  |        |
| 584184  | 221110  | 64420  | 59615  | 22937  | 134 | Light  | Peak Foun         | High      | Peak Foun | Peak Foun | Peak Foun | Peak Foun | High      | 0.00926 | 0.08578 | 2.42    | 66.35  |        |
| 18615   |         |        |        |        | 128 | Light  | Peak Foun         | High      | Not Found | Not Found | Not Found | Not Found | High      | 0.00926 | 0.06937 | 1.49    | 155.62 |        |
| 76055   | 23273   | 13860  | 13124  |        | 120 | Light  | High              | High      | Peak Foun | Peak Foun | Peak Foun | Not Found | High      | 0.00926 | 0.06975 | 3.01    | 153.86 |        |
| 51863   | 17527   | 12228  | 7787   | 3859   | 119 | Light  | Peak Foun         | High      | Peak Foun | Peak Foun | Peak Foun | Peak Foun | High      | 0.00926 | 0.0907  | 3.57    | 172.4  |        |
| 21354   | 11283   |        |        |        | 118 | Light  | High              | Peak Foun | Peak Foun | Not Found | Not Found | Not Found | High      | 0.00952 | 0.0489  | 3.64    | 81.28  |        |
| 66991   | 55974   |        |        |        | 104 | Light  | Not Found         | High      | Peak Foun | Not Found | Not Found | Not Found | High      | 0.00926 | 0.01803 | 4.34    | 197.6  |        |
| 86133   | 143622  |        |        |        | 105 | Light  | Peak Foun         | High      | Peak Foun | Not Found | Not Found | Not Found | High      | 0.00926 | 0.02176 | 3.37    | 130.56 |        |
| 33955   |         |        | 3236   |        | 106 | Light  | Peak Foun         | High      | Not Found | Not Found | Peak Foun | Not Found | High      | 0.00926 | 0.03314 | 3.47    | 153.75 |        |
| 1255966 | 934571  |        |        |        | 107 | Light  | High              | Peak Foun | Peak Foun | Not Found | Not Found | Not Found | High      | 0.00952 | 0.1305  | 2.25    | 85.89  |        |
| 138589  | 96197   |        |        |        | 108 | Light  | High              | Peak Foun | Peak Foun | Not Found | Not Found | Not Found | High      | 0.00952 | 0.06506 | 4.78    | 184.61 |        |
| 67667   | 38325   | 36397  | 12047  | 4813   | 109 | Light  | High              | Peak Foun | Peak Foun | Peak Foun | Peak Foun | Peak Foun | High      | 0.00952 | 0.1738  | 2.68    | 96.2   |        |
| 111295  | 120338  |        |        |        | 110 | Light  | High              | High      | Peak Foun | Not Found | Not Found | Not Found | High      | 0.00926 | 0.02329 | 2.5     | 74.49  |        |
| 996142  | 329013  | 854416 | 247516 | 107353 | 111 | Light  | Peak Foun         | High      | Peak Foun | Peak Foun | Peak Foun | Peak Foun | High      | 0.00926 | 0.1554  | 1.97    | 81.99  |        |
|         |         |        |        |        |     |        | NoQuanValues      |           | Not Found | Not Found | Not Found | Not Found | Not Found | High    | 0.00952 | 0.04005 | 4.02   |        |
| 213007  | 388176  |        |        |        | 112 | Light  | Peak Foun         | High      | Peak Foun | Not Found | Not Found | Not Found | High      | 0.00926 | 0.0551  | 2.23    | 34.3   |        |
| 14927   | 4965    |        |        |        | 113 | Light  | High              | Peak Foun | Peak Foun | Not Found | Not Found | Not Found | High      | 0.00952 | 0.1483  | 3.36    | 169.77 |        |
| 39304   | 41729   |        | 3255   |        | 114 | Light  | Peak Foun         | High      | Peak Foun | Not Found | Peak Foun | Not Found | High      | 0.00926 | 0.03207 | 4.1     | 150.44 |        |
| 357966  | 172677  |        |        |        | 115 | Light  | Peak Foun         | High      | Peak Foun | Not Found | Not Found | Not Found | High      | 0.00926 | 0.09403 | 2.75    | 141.3  |        |
| 52753   | 34988   |        |        |        | 116 | Light  | Peak Foun         | High      | Peak Foun | Not Found | Not Found | Not Found | High      | 0.00926 | 0.02873 | 4.05    | 133.32 |        |
| 19886   | 14000   | 25011  | 18779  | 13229  | 117 | Light  | High              | Peak Foun | Peak Foun | Peak Foun | Peak Foun | Peak Foun | High      | 0.00952 | 0.1033  | 3.51    | 66.54  |        |
| 90622   | 104624  |        |        |        | 102 | Light  | High              | High      | Peak Foun | Not Found | Not Found | Not Found | High      | 0.00926 | 0.00038 | 7.03    | 97.1   |        |
| 8637    |         | 18677  |        |        | 66  | Light  | High              | Peak Foun | Not Found | Peak Foun | Not Found | Not Found | High      | 0.00952 | 0.1049  | 4.99    | 183.61 |        |
| 19207   |         | 24906  | 16719  |        | 67  | Heavy  | Peak Foun         | Peak Foun | Not Found | High      | High      | Not Found | High      | 0.00952 | 0.05309 | 3.11    | 194.75 |        |
|         |         |        |        |        | 67  | Redunc | Light             | High      | Peak Foun | Not Found | Peak Foun | Peak Foun | Not Found | High    | 0.00952 | 0.01989 | 4.37   | 194.75 |
| 29144   | 68773   |        |        |        | 19  | Light  | Not Found         | High      | Peak Foun | Not Found | Not Found | Not Found | High      | 0.00926 | 0.03715 | 2.35    | 169.43 |        |
| 18947   | 14699   |        |        |        | 20  | Light  | High              | Peak Foun | Peak Foun | Not Found | Not Found | Not Found | High      | 0.00952 | 0.1446  | 2.42    | 61.2   |        |
| 308034  | 294390  | 162349 | 53080  | 46588  | 21  | Light  | High              | Peak Foun | Peak Foun | Peak Foun | Peak Foun | Peak Foun | High      | 0.00952 | 0.08342 | 3.49    | 68.68  |        |
| 127791  | 142490  | 3753   |        |        | 22  | Light  | High              | High      | Peak Foun | Peak Foun | Not Found | Not Found | High      | 0.00926 | 0.00218 | 3.34    | 119.83 |        |
| 47363   | 10860   |        |        |        | 23  | Light  | Peak Foun         | High      | Peak Foun | Not Found | Not Found | Not Found | High      | 0.00926 | 0.06928 | 3.13    | 126.59 |        |
| 120773  | 425803  |        |        |        | 24  | Light  | Peak Foun         | High      | Peak Foun | Not Found | Not Found | Not Found | High      | 0.00926 | 0.01609 | 2.01    | 209.55 |        |
| 52976   |         |        |        |        | 18  | Light  | High              | Peak Foun | Not Found | Not Found | Not Found | Not Found | High      | 0.00952 | 0.00283 | 8.97    | 198.09 |        |

|          |         |        |        |        |    |                    |           |           |           |           |           |           |           |      |         |         |      |        |
|----------|---------|--------|--------|--------|----|--------------------|-----------|-----------|-----------|-----------|-----------|-----------|-----------|------|---------|---------|------|--------|
| 13340    | 23461   |        |        |        | 25 | Light              | High      | Peak Foun | Peak Foun | Not Found | Not Found | Not Found | Not Found | High | 0.00952 | 0.06686 | 2.97 | 126.12 |
| 63068    | 32121   |        |        |        | 27 | Light              | High      | Peak Foun | Peak Foun | Not Found | Not Found | Not Found | Not Found | High | 0.00952 | 0.0237  | 4.65 | 147.55 |
|          |         |        |        |        |    | IndistinguishableC |           | Not Found | Not Found | Not Found | Not Found | Not Found | Not Found | High | 0.00952 | 0.2393  | 1.94 | 79.8   |
| 63037    | 29091   |        | 6983   | 4189   | 28 | Light              | High      | High      | Peak Foun | Not Found | Peak Foun | Peak Foun | Peak Foun | High | 0.00926 | 0.02239 | 3.11 | 90.12  |
| 126373   | 55974   | 18019  | 16729  | 10883  | 29 | Light              | Peak Foun | High      | Peak Foun | Peak Foun | Peak Foun | Peak Foun | Peak Foun | High | 0.00926 | 0.123   | 1.99 | 75.4   |
| 1041120  |         |        |        |        | 30 | Light              | Not Found | High      | Not Found | Not Found | Not Found | Not Found | Not Found | High | 0.00926 | 0.08016 | 1.5  | 12.63  |
| 115357   | 62017   | 4217   | 3358   | 4808   | 31 | Light              | High      | Peak Foun | Peak Foun | Peak Foun | Peak Foun | Peak Foun | Peak Foun | High | 0.00952 | 0.0791  | 2.74 | 156.79 |
| 258828   | 133399  |        |        |        | 26 | Light              | High      | High      | Peak Foun | Not Found | Not Found | Not Found | Not Found | High | 0.00952 | 0.00054 | 7.68 | 121.21 |
| 18712346 | 9472472 |        |        |        | 17 | Light              | High      | Peak Foun | Peak Foun | Not Found | Not Found | Not Found | Not Found | High | 0.00952 | 0.0371  | 3.74 | 61.04  |
|          |         | 76291  | 51091  | 25084  | 16 | Heavy              | Not Found | Not Found | Not Found | High      | High      | Peak Foun | Peak Foun | High | 0.00952 | 0.03034 | 5.16 | 187.82 |
| 58828    | 39595   | 44951  | 14641  | 10103  | 15 | Light              | Peak Foun | High      | Peak Foun | Peak Foun | Peak Foun | Peak Foun | Peak Foun | High | 0.00926 | 0.111   | 2.97 | 111.77 |
| 24822    | 15091   | 8623   |        |        | 2  | Light              | High      | Peak Foun | Peak Foun | Peak Foun | Not Found | Not Found | Not Found | High | 0.00952 | 0.2127  | 3.23 | 12.53  |
| 224498   | 417943  |        |        |        | 3  | Light              | Peak Foun | High      | Peak Foun | Not Found | Not Found | Not Found | Not Found | High | 0.00926 | 0.05906 | 2.6  | 82.79  |
| 71480    | 65476   |        |        |        | 4  | Light              | Peak Foun | High      | Peak Foun | Not Found | Not Found | Not Found | Not Found | High | 0.00926 | 0.2237  | 2.82 | 130.31 |
| 494633   | 280920  | 324504 | 143575 | 87715  | 5  | Heavy              | Peak Foun | Peak Foun | Peak Foun | High      | Peak Foun | Peak Foun | Peak Foun | High | 0.00952 | 0.03278 | 3.05 | 62.87  |
| 225754   | 134784  | 78145  | 41290  | 28181  | 6  | Light              | Peak Foun | High      | Peak Foun | Peak Foun | Peak Foun | Peak Foun | Peak Foun | High | 0.00926 | 0.1674  | 1.32 | 138.38 |
| 2349152  | 1283064 | 438600 | 430367 | 278265 | 7  | NotUni             | Light     | Peak Foun | High      | Peak Foun | Peak Foun | Peak Foun | Peak Foun | High | 0.00926 | 0.0777  | 3.01 | 120.98 |
|          |         |        |        |        | 7  | Redunc             | Heavy     | Peak Foun | Peak Foun | Peak Foun | Peak Foun | High      | Peak Foun | High | 0.00926 | 0.07588 | 3.03 | 120.98 |
| 273415   | 140072  | 142741 | 56510  | 33423  | 8  | Light              | Peak Foun | High      | Peak Foun | Peak Foun | Peak Foun | Peak Foun | Peak Foun | High | 0.00926 | 0.1275  | 2.39 | 93.72  |
| 6080934  | 4099810 |        |        |        | 9  | Light              | High      | High      | Peak Foun | Not Found | Not Found | Not Found | Not Found | High | 0.00952 | 0.00067 | 7.86 | 111.98 |
| 5086647  | 2864086 |        | 4136   |        | 10 | Light              | High      | High      | Peak Foun | Not Found | Peak Foun | Not Found | Not Found | High | 0.00926 | 0.00015 | 7.5  | 137.63 |
| 725413   | 776229  |        |        |        | 11 | Light              | Peak Foun | High      | Peak Foun | Not Found | Not Found | Not Found | Not Found | High | 0.00926 | 0.206   | 2.63 | 78.33  |
| 86303    | 49231   | 46723  | 22213  | 16181  | 12 | Light              | High      | Peak Foun | Peak Foun | Peak Foun | Peak Foun | Peak Foun | Peak Foun | High | 0.00952 | 0.08346 | 3.94 | 216.93 |
|          |         |        |        |        | 12 | Redunc             | Heavy     | Peak Foun | Peak Foun | Peak Foun | Peak Foun | High      | Peak Foun | High | 0.00926 | 0.1549  | 3.07 | 216.93 |
| 231113   | 17064   | 100424 |        |        | 13 | Light              | High      | Peak Foun | Peak Foun | Peak Foun | Not Found | Not Found | Not Found | High | 0.00952 | 0.01513 | 3.67 | 203.33 |
|          |         | 48157  | 27107  | 21195  | 14 | Heavy              | Not Found | Not Found | Not Found | High      | Peak Foun | Peak Foun | Peak Foun | High | 0.00952 | 0.2079  | 3.03 | 164.18 |
| 1289803  | 543884  | 560740 | 290166 | 142998 | 32 | Light              | Peak Foun | High      | Peak Foun | Peak Foun | Peak Foun | Peak Foun | Peak Foun | High | 0.00926 | 0.00552 | 4.14 | 169.73 |
|          |         |        |        |        | 32 | Redunc             | Heavy     | Peak Foun | Peak Foun | Peak Foun | High      | High      | Peak Foun | High | 0.00926 | 0.02914 | 3.19 | 169.73 |
| 147556   | 75636   |        |        |        | 33 | Light              | High      | High      | Peak Foun | Not Found | Not Found | Not Found | Not Found | High | 0.00952 | 0.01368 | 4.1  | 82.39  |
| 14012    |         |        |        |        | 34 | Light              | High      | Peak Foun | Not Found | Not Found | Not Found | Not Found | Not Found | High | 0.00952 | 0.05095 | 4.3  | 147.31 |
| 8485     | 10491   | 1518   | 1623   |        | 52 | Light              | High      | Peak Foun | Peak Foun | Peak Foun | Peak Foun | Not Found | Not Found | High | 0.00952 | 0.1625  | 2.79 | 141.94 |
| 50922    | 64544   | 37232  | 70158  | 95903  | 53 | Light              | Peak Foun | High      | Peak Foun | Peak Foun | Peak Foun | Peak Foun | Peak Foun | High | 0.00926 | 0.1871  | 2.53 | 13.8   |
| 735675   | 1839442 |        |        |        | 54 | Light              | High      | Peak Foun | Peak Foun | Not Found | Not Found | Not Found | Not Found | High | 0.00952 | 0.01125 | 5.18 | 116.54 |
| 455605   | 296393  |        |        |        | 55 | Light              | High      | Peak Foun | Peak Foun | Not Found | Not Found | Not Found | Not Found | High | 0.00952 | 0.00101 | 4.93 | 101.16 |
| 28014    | 13762   | 44367  |        | 31034  | 56 | Light              | High      | Peak Foun | Peak Foun | Peak Foun | Not Found | Peak Foun | Peak Foun | High | 0.00952 | 0.06628 | 3.16 | 208.2  |
|          |         |        |        |        | 57 | NoQua              | Light     | Not Found | High      | Not Found | Not Found | Not Found | Not Found | High | 0.00926 | 0.05711 | 3.47 |        |
| 39274    | 116702  |        |        |        | 58 | Light              | Not Found | High      | Peak Foun | Not Found | Not Found | Not Found | Not Found | High | 0.00926 | 0.1118  | 3.25 | 155.94 |
| 4547298  | 1820489 |        |        |        | 59 | Light              | High      | High      | Peak Foun | Not Found | Not Found | Not Found | Not Found | High | 0.00926 | 0.0001  | 6.25 | 149.67 |
| 452717   | 1051039 |        |        |        | 60 | Light              | High      | Peak Foun | Peak Foun | Not Found | Not Found | Not Found | Not Found | High | 0.00952 | 0.04976 | 4.62 | 163.36 |
| 96772    | 25096   | 46410  | 30148  | 7724   | 61 | Light              | High      | Peak Foun | Peak Foun | Peak Foun | Peak Foun | Peak Foun | Peak Foun | High | 0.00952 | 0.04319 | 3.5  | 149.52 |
|          |         |        |        |        | 61 | Redunc             | Heavy     | Peak Foun | Peak Foun | Peak Foun | High      | Peak Foun | Peak Foun | High | 0.00952 | 0.05371 | 3.22 | 149.52 |
| 576744   | 431117  |        |        |        | 62 | Light              | Peak Foun | High      | Peak Foun | Not Found | Not Found | Not Found | Not Found | High | 0.00926 | 0.1852  | 1.95 | 62     |

|         |         |        |        |        |     |        |           |           |           |           |           |           |           |      |         |          |      |        |
|---------|---------|--------|--------|--------|-----|--------|-----------|-----------|-----------|-----------|-----------|-----------|-----------|------|---------|----------|------|--------|
| 87586   | 70028   | 2681   | 3552   | 2135   | 63  | Light  | Peak Foun | High      | Peak Foun | Peak Foun | Peak Foun | Peak Foun | Peak Foun | High | 0.00926 | 0.208    | 2.2  | 14.53  |
| 1762565 | 2376169 | 2368   | 3778   |        | 64  | Light  | High      | High      | Peak Foun | Peak Foun | Peak Foun | Not Found | High      |      | 0.00926 | 0.00929  | 2.65 | 58.52  |
| 5395    | 3488    | 95091  | 15754  | 13331  | 65  | Heavy  | Peak Foun | Peak Foun | Peak Foun | High      | Peak Foun | Peak Foun | High      |      | 0.00952 | 0.06052  | 2.47 | 139.87 |
| 30436   | 27240   |        |        |        | 51  | Light  | Peak Foun | High      | Peak Foun | Not Found | Not Found | Not Found | High      |      | 0.00926 | 0.07895  | 2.17 | 12.53  |
| 68552   | 19005   |        | 7353   |        | 135 | Light  | Peak Foun | High      | Peak Foun | Not Found | Peak Foun | Not Found | High      |      | 0.00926 | 0.2299   | 2.39 | 79.45  |
|         |         |        |        |        | 50  | NoQua  | Light     | High      | Not Found | Not Found | Not Found | Not Found | Not Found | High | 0.00952 | 0.0379   | 3.72 |        |
|         |         |        |        |        | 48  | Redunc | Heavy     | Peak Foun | Peak Foun | Peak Foun | High      | Peak Foun | Peak Foun | High | 0.00952 | 0.02813  | 4.37 | 53.44  |
| 103708  | 229300  |        |        |        | 35  | Light  | Peak Foun | High      | Peak Foun | Not Found | Not Found | Not Found | High      |      | 0.00926 | 0.00357  | 3.56 | 72.18  |
| 61827   | 60306   |        |        |        | 36  | Light  | High      | High      | Peak Foun | Not Found | Not Found | Not Found | High      |      | 0.00926 | 0.00061  | 5.66 | 109.64 |
| 43192   | 22576   | 30265  | 27981  | 19329  | 37  | Light  | High      | Peak Foun | Peak Foun | Peak Foun | Peak Foun | Peak Foun | High      |      | 0.00952 | 0.2412   | 2.78 | 145.57 |
|         |         |        |        |        | 38  | NoQua  | Light     | Not Found | High      | Not Found | Not Found | Not Found | Not Found | High | 0.00926 | 0.06369  | 3.16 |        |
| 25320   | 25038   | 12723  |        | 5735   | 39  | Light  | High      | Peak Foun | Peak Foun | Peak Foun | Not Found | Peak Foun | High      |      | 0.00952 | 0.05103  | 2.84 | 49.35  |
| 333247  | 195905  |        |        |        | 40  | Light  | High      | High      | Peak Foun | Not Found | Not Found | Not Found | High      |      | 0.00926 | 0.00073  | 6.01 | 103.01 |
| 1304975 | 504186  |        |        |        | 41  | Light  | High      | Peak Foun | Peak Foun | Not Found | Not Found | Not Found | High      |      | 0.00952 | 0.00912  | 5.57 | 184.36 |
| 50267   | 67079   |        |        |        | 42  | Light  | High      | High      | Peak Foun | Not Found | Not Found | Not Found | High      |      | 0.00926 | 3.14E-05 | 6.11 | 47.88  |
| 225789  | 130392  |        |        |        | 43  | Light  | High      | Peak Foun | Peak Foun | Not Found | Not Found | Not Found | High      |      | 0.00952 | 0.02587  | 3.42 | 66.22  |
| 172917  | 133482  |        |        |        | 44  | Light  | Peak Foun | High      | Peak Foun | Not Found | Not Found | Not Found | High      |      | 0.00926 | 0.00045  | 5.52 | 139.36 |
| 72458   | 64978   |        |        |        | 45  | Light  | Peak Foun | High      | Peak Foun | Not Found | Not Found | Not Found | High      |      | 0.00926 | 0.04958  | 3.59 | 121.87 |
| 84374   | 36661   | 116166 | 50139  | 23636  | 46  | Light  | High      | Peak Foun | Peak Foun | Peak Foun | Peak Foun | Peak Foun | High      |      | 0.00952 | 0.1042   | 3.14 | 55.16  |
|         |         |        |        |        | 46  | Redunc | Heavy     | Peak Foun | Peak Foun | Peak Foun | High      | High      | Peak Foun | High | 0.00926 | 0.0856   | 3.28 | 55.16  |
| 185626  | 58231   | 123750 | 135632 | 48730  | 47  | Heavy  | Peak Foun | Peak Foun | Peak Foun | High      | Peak Foun | Peak Foun | High      |      | 0.00952 | 0.2036   | 1.22 | 37.68  |
| 1321874 | 500573  | 471321 | 226060 | 152959 | 48  | Light  | High      | High      | Peak Foun | Peak Foun | Peak Foun | Peak Foun | High      |      | 0.00926 | 0.00263  | 5.15 | 53.44  |
| 33923   | 28922   |        |        |        | 49  | Light  | High      | Peak Foun | Peak Foun | Not Found | Not Found | Not Found | High      |      | 0.00952 | 0.01111  | 4.82 | 63.63  |
| 1549846 | 657740  |        |        |        | 136 | Light  | High      | High      | Peak Foun | Not Found | Not Found | Not Found | High      |      | 0.00952 | 0.00106  | 6.68 | 114.95 |



|    |        |                 |        |        |        |    |    |        |        |        |        |        |        |        |        |        |        |        |        |
|----|--------|-----------------|--------|--------|--------|----|----|--------|--------|--------|--------|--------|--------|--------|--------|--------|--------|--------|--------|
| 40 | Q86YZ3 | Hornerin OS=Hc  | NA     | NA     | NA     | NA | NA | 14.801 | 15.744 | 14.788 | NA     | NA     | NA     | 14.748 | 14.243 | 16.305 | 14.872 | 16.094 | 16.108 |
| 41 | Q8N257 | Histone H2B ty  | NA     | NA     | NA     | NA | NA | NA     | NA     | NA     | 1.136  | 1.741  | 1.981  | NA     | NA     | NA     | NA     | NA     | NA     |
| 42 | Q93077 | Histone H2A ty  | NA     | NA     | NA     | NA | NA | 2.725  | 3.675  | 3.138  | NA     | NA     | NA     | NA     | NA     | NA     | NA     | NA     | NA     |
| 43 | Q96DR8 | Mucin-like prot | 17.052 | 16.083 | 15.237 | NA | NA | NA     | NA     | NA     | NA     | NA     | NA     | NA     | NA     | NA     | NA     | NA     | NA     |
| 44 | Q96RW7 | Hemicentin-1 O  | NA     | NA     | NA     | NA | NA | NA     | NA     | NA     | NA     | NA     | NA     | NA     | NA     | NA     | 17.382 | 16.978 | 17.039 |
| 45 | Q96S38 | Ribosomal prot  | NA     | NA     | NA     | NA | NA | NA     | NA     | NA     | NA     | NA     | NA     | 15.598 | 16.075 | 15.996 | NA     | NA     | NA     |
| 46 | Q99878 | Histone H2A ty  | NA     | NA     | NA     | NA | NA | NA     | NA     | NA     | NA     | NA     | NA     | 1.204  | 2.459  | 16.310 | NA     | NA     | NA     |
| 47 | Q9ULS5 | Transmembran    | NA     | NA     | NA     | NA | NA | NA     | NA     | NA     | NA     | NA     | NA     | 15.070 | 15.341 | 15.405 | 14.965 | 15.409 | 15.198 |
| 48 | Q9UM00 | Calcium load-ac | NA     | NA     | NA     | NA | NA | NA     | NA     | NA     | 12.647 | 13.352 | 15.972 | NA     | NA     | NA     | NA     | NA     | NA     |



**Supplemental Table 5.2.** Master protein identifications from CD3 SPPLATed primary human T cells with SILAC abundance ratio Light/Heavy > 1 not present in controls

|    | Master.Pri | Master.Protei  | Condition A |        |        | Condition B |        |       | Condition C |         |         | Condition D |        |        | Condition E |      | Condition F |      |      |
|----|------------|----------------|-------------|--------|--------|-------------|--------|-------|-------------|---------|---------|-------------|--------|--------|-------------|------|-------------|------|------|
|    |            |                | rep1        | rep2   | rep3   | rep1        | rep2   | rep3  | rep1        | rep2    | rep3    | rep1        | rep2   | rep3   | rep1        | rep2 | rep3        | rep1 | rep2 |
|    | O60814     | Histone H2B t  | NA          | NA     | NA     | NA          | NA     | NA    | NA          | NA      | 2.042   | 2.166       | 2.167  | NA     | NA          | NA   | NA          | NA   | NA   |
| 1  | P05107     | Integrin beta- | NA          | NA     | NA     | NA          | NA     | NA    | NA          | NA      | 14.764  | 15.186      | 14.777 | NA     | NA          | NA   | NA          | NA   | NA   |
| 2  | P16070     | CD44 antigen   | NA          | NA     | NA     | NA          | NA     | NA    | NA          | NA      | 16.577  | 15.619      | 15.092 | NA     | NA          | NA   | NA          | NA   | NA   |
| 3  | P16402     | Histone H1.3   | NA          | NA     |        | 1.422       | 2.289  | 1.703 | NA          | NA      | 1.889   | 1.912       | 1.853  | NA     | NA          | NA   | NA          | NA   | NA   |
| 4  | P26373     | 60S ribosoma   | 15.795      | 15.136 | 14.520 | NA          | NA     | NA    | NA          | NA      | NA      | NA          | NA     | NA     | NA          | NA   | NA          | NA   | NA   |
| 5  | P47914     | 60S ribosoma   | NA          | NA     | NA     | NA          | NA     | NA    | NA          | NA      | 1.796   | 1.583       | 1.233  | NA     | NA          | NA   | NA          | NA   | NA   |
| 6  | P60709     | Actin, cytopla | 15.377      | 8.861  | 14.292 | 4.302       | 15.078 | 2.959 | 2.825       | 3.1029  | 13.3305 | 14.646      | 13.685 | 14.804 | NA          | NA   | NA          | NA   | NA   |
| 7  | P61254     | 60S ribosoma   | NA          | NA     | NA     | NA          | NA     |       | 2.792       | 2.5153  | 2.9152  | NA          | NA     | NA     | NA          | NA   | NA          | NA   | NA   |
| 8  | P63104     | 14-3-3 protei  | NA          | NA     | NA     | NA          | NA     | NA    | NA          | NA      | 2.003   | 1.380       | 1.551  | NA     | NA          | NA   | NA          | NA   | NA   |
| 9  | P68104     | Elongation fa  | NA          | NA     | NA     | NA          | NA     | NA    | NA          | NA      | 13.040  | 1.263       | 2.296  | NA     | NA          | NA   | NA          | NA   | NA   |
| 10 | Q13029     | PR domain zir  | 23.186      | 22.233 | 21.839 | NA          | NA     |       | 21.489      | 21.6693 | 21.4245 | 13.047      | 22.057 | 21.413 | NA          | NA   | NA          | NA   | NA   |
| 11 | Q15651     | High mobility  | NA          | NA     | NA     | NA          | NA     |       | 13.371      | 15.7908 | 11.7151 | NA          | NA     | NA     | NA          | NA   | NA          | NA   | NA   |
| 12 | Q5T7M9     | Protein FAM6   | NA          | NA     | NA     | NA          | NA     |       | 1.027       | 2.9771  | 13.1012 | NA          | NA     | NA     | NA          | NA   | NA          | NA   | NA   |
| 13 | Q5U623     | Activating tra | NA          | NA     | NA     | NA          | NA     | NA    | NA          | NA      | 11.954  | 15.656      | 15.798 | NA     | NA          | NA   | NA          | NA   | NA   |
| 14 | Q7L7L0     | Histone H2A t  | NA          | NA     |        | 11.286      | 14.241 | 2.965 | NA          | NA      | NA      | NA          | NA     | NA     | NA          | NA   | NA          | NA   | NA   |
| 15 | Q8N257     | Histone H2B t  | NA          | NA     | NA     | NA          | NA     | NA    | NA          | NA      | 1.136   | 1.741       | 1.981  | NA     | NA          | NA   | NA          | NA   | NA   |
| 16 | Q93077     | Histone H2A t  | NA          | NA     | NA     | NA          | NA     |       | 2.7247      | 3.6749  | 3.1383  | NA          | NA     | NA     | NA          | NA   | NA          | NA   | NA   |
| 17 | Q96DR8     | Mucin-like pr  | 17.052      | 16.083 | 15.237 | NA          | NA     | NA    | NA          | NA      | NA      | NA          | NA     | NA     | NA          | NA   | NA          | NA   | NA   |
| 18 | Q9UM00     | Calcium load-  | NA          | NA     | NA     | NA          | NA     | NA    | NA          | NA      | 12.647  | 13.352      | 15.972 | NA     | NA          | NA   | NA          | NA   | NA   |

**Supplemental Table 6.** List of antibodies used in this work

| Antigen                              | Conjugate | Application                           | Company             | Cat.           | Dilution                                          |
|--------------------------------------|-----------|---------------------------------------|---------------------|----------------|---------------------------------------------------|
| CD3, clone UCHT1 (mouse primary)     |           | Stimulation for Immunoblotting        | BioLegend           | 300402         | 10 µg/ml                                          |
| Anti-mouse secondary                 |           | Stimulation for Immunoblotting        | BioLegend           | 405301         | 30 µg/ml                                          |
| pERK1/2                              |           | Immunoblotting                        | Cell Signaling      | 4370           | 1/1000                                            |
| ERK1/2                               |           | Immunoblotting                        | Cell Signaling      | 9102           | 1/1000                                            |
| p-CYTIP(T280)                        |           | Immunoblotting                        | MRC PPU reagents    | SA512- bleed 4 | 1 µg/ml antibody and 10 µg/ml non-phospho peptide |
| CYTIP                                |           | Immunoblotting                        | Abcam               | 96623          | 1/1000                                            |
| Cytohesin-1                          |           | Immunoblotting                        | Abcam               | 151732         | 1/1000                                            |
| SNX27                                |           | Immunoblotting                        | Abcam               | 77799          | 1/1000                                            |
| Anti-Sheep secondary                 | HRP       | Immunoblotting                        | R&D Systems         | HAF016         | 1/10000                                           |
| Anti-rabbit secondary                | HRP       | Immunoblotting                        | Cell Signaling      | 9212           | 1/10000                                           |
| Cytohesin-1                          |           | Immunoprecipitation                   | R&D Systems         | AF4807         |                                                   |
| Goat IgG                             |           | Immunoprecipitation                   | R&D Systems         | AB-108-C       |                                                   |
| CD3, clone OKT3                      |           | T cell stimulation                    | ebioscience         | 16-0037        | see figures for concentrations used               |
| CD28, clone CD28.2                   |           | T cell stimulation                    | BD biosciences      | 555726         | see figures for concentrations used               |
| IFN $\gamma$                         |           | IFN $\gamma$ ELISA capture antibody   | BD biosciences      | 551221         | 4 µg/ml                                           |
| IFN $\gamma$                         | biotin    | IFN $\gamma$ ELISA detection antibody | BD biosciences      | 554550         | 1 µg/ml                                           |
| CD3, clone UCHT1 (mouse primary)     |           | SPPLAT                                | BD biosciences      | 555329         | 10 µg/ml                                          |
| CD3, clone UCHT1                     | HRP       | SPPLAT                                | Abcore              | AC14-0024-14   | 10 µg/ml                                          |
| Anti-mouse secondary                 | HRP       | SPPLAT                                | Jackson Immuno Rese | 115-035-071    | 50 µg/ml                                          |
| CD3, clone UCHT1 (mouse primary)     |           | Confocal microscopy                   | R&D Systems         | MAB100         | 10 µg/ml                                          |
| CD3, clone UCHT1                     | AF647     | Confocal microscopy                   | BioLegend           | 300416         | 10 µg/ml                                          |
| Anti-mouse secondary                 | AF647     | Confocal microscopy                   | BioLegend           | 405322         | 30 µg/ml                                          |
| LFA-1 (CD11a/CD18, clone m24)        | AF488     | Confocal microscopy                   | BioLegend           | 363403         | 10 µg/ml                                          |
| Integrin $\alpha$ L (rabbit primary) |           | Confocal microscopy                   | Covalab             | ?              | 1/5000                                            |
| anti-rabbit secondary                | FITC      | Confocal microscopy                   | Jackson Immuno Rese | ?              |                                                   |
| Cytohesin-1/2 (mouse primary)        |           | Confocal microscopy                   | Santa Cruz          | sc-166542      | 1/50                                              |
| Anti-mouse secondary                 | CFL488    | Confocal microscopy                   | Santa Cruz          | ?              | 1/50                                              |

|                                  |                                     |                     |                     |             |                  |
|----------------------------------|-------------------------------------|---------------------|---------------------|-------------|------------------|
| β-actin, clone 2F1-1             | AF488                               | Confocal microscopy | BioLegend           | 643812      | 5 µg/ml or 1/100 |
| CYTIP                            | AF488 (using Lightning-Link® Rapid) | Confocal microscopy | ThermoFisher        | PA5-52400   | ?                |
| CD3, clone SK7                   | BV605                               | Flow cytometry      | BioLegend           | 344836      | ?                |
| CD4, clone OKT4                  | BV710                               | Flow cytometry      | BioLegend           | 317439      | ?                |
| CD8, clone?                      | BV785                               | Flow cytometry      | BioLegend           | 301045      |                  |
| pSTAT5(pY694)                    | AF647                               | Flow cytometry      | BD biosciences      | 562076      | 1 test           |
| CD3, clone UCHT1 (mouse primary) |                                     | Flow cytometry      | BD biosciences      | 555329      | 10 µg/ml         |
| Anti-mouse secondary             | HRP                                 | Flow cytometry      | Jackson Immuno Rese | 115-035-071 | 50 µg/ml         |
| pERK                             | AF647(pT202/pY204)                  | Flow cytometry      | BD biosciences      | 612593      | 1 test           |

**Supplemental Table 7.** Stimulation scheme and antibody conjugation state used in each experiment and condition

| Experiment                              | Stimulation            | No IL-7 prime, no TCR activation | No IL-7 prime, TCR activation | IL-7 prime, no TCR activation | IL-7 prime, TCR activation | Negative control | Negative control |
|-----------------------------------------|------------------------|----------------------------------|-------------------------------|-------------------------------|----------------------------|------------------|------------------|
| Condition                               |                        | A                                | B                             | C                             | D                          | E                | F                |
| <b>SPLATT</b>                           | IL-7 24h prime         | -                                | -                             | +                             | +                          | -                | +                |
|                                         | Anti-CD3 antibody      | HRP                              | unconjugated                  | HRP                           | unconjugated               | -                | -                |
|                                         | Cross-linking antibody | -                                | HRP                           | -                             | HRP                        | HRP              | HRP              |
| <b>Immunofluorescence</b>               | IL-7 24h prime         | -                                | -                             | +                             | +                          | -                | +                |
|                                         | Anti-CD3 antibody      | AF647                            | unconjugated                  | AF647                         | unconjugated               | -                | -                |
|                                         | Cross-linking antibody | -                                | AF647                         | -                             | AF647                      | -                | -                |
| <b>Immunoprecipitation/western blot</b> | IL-7 24h prime         | -                                | -                             | +                             | +                          | -                | +                |
|                                         | Anti-CD3 antibody      | +                                | +                             | +                             | +                          | -                | -                |
|                                         | Cross-linking antibody | -                                | +                             | -                             | +                          | -                | -                |
